# Supplementary material
Source: publisher figshare collection journal article supplement (https://plos.figshare.com/articles/dataset/_/5160220)
Supplement: Supplementary file 1 [file 1]

Archive with 21 entries (21 files):
- S1 Fig.pdf
- S2 Fig.pdf
- S3 Fig.pdf
- S4 Fig.pdf
- S5 Fig.pdf
- S6 Fig.pdf
- S7 Fig.pdf
- S8 Fig.pdf
- S9 Fig.pdf
- S10 Fig.pdf
- S11 Fig.pdf
- S1 Table.pdf
- S2 Table.pdf
- S3 Table.pdf
- S4 Table.pdf
- S5 Table.pdf
- S6 Table.pdf
- S1 Dataset.txt
- S2 Dataset.zip
- S3 Dataset.txt
- S4 Dataset.txt
