# Supplementary material
Source: publisher figshare collection journal article supplement (https://plos.figshare.com/articles/dataset/_/5160220)
Supplement: Supplementary file 1 [file 1 › S1 Dataset.txt]

#RT_LTR: RTs from retrotransposons and retroviruses which have long terminal repeats (LTRs) in their DNA copies but not in their RNA templates
>gi|7267755|emb|CAB78181.1|
PVLFVKK--K-DG-S-----FRLCIDY--RE-LNRVT--VKNRYPLPRIDELLDQLR-GATCFSKIDLTSGYHQIPIAEADVRKTAFRTR-Y--GHFEFVVMPFGLTNAPAVFMRLMNSV--FQEFLDE-FVIIFIDDILVYSK--SPEE-QEVHLRRVMEKLREQKLFAKLSKCSFWQREMGFLGH
>gi|18092337|gb|AAL59229.1|
PVLFVNK--K-DG-S-----RRMCVDY--RS-LNEVT--IKNKYPLPRIEDLFDQMK-GAKVFSKIDLRSGYHQLKIRAEDVPKTAFTTR-Y--GLYEFLVMSFGLTNAPAYFMNLMNKV--FMEYLDQ-FVVVFIDDILIYSS--NEEA-HEDHLRLVLQKLRDNQLYAKFSKCDFWLKEVAFLGH
>gi|74013162|ref|XP_848677.1|
NPVLVRK--K-GG-K-----WRMCVDY--TG-LNKAC--PKVPYPLPRIDQIVDSTA-GCETLSFLDAYSGYHQIRMKESDQLATSFITP-F--GMYCYVTMPFGMRNAGATYQRCMNHV--FGEHIGR-TVEAYVDDIVVKTR--KASD-LLSDLEVTFRCLKAKGVKLNPEKCVFGVPRGMLLGF
>gi|6321547|ref|NP_011624.1|
PVVLVPK--K-DG-T-----FRLCVDY--RT-LNKAT--ISDPFPLPRIDNLLSRIG-NAQIFTTLDLHSGYHQIPMEPKDRYKTAFVTP-S--GKYEYTVMPFGLVNAPSTFARYMADT--FRDLR---FVNVYLDDILIFSE--SPEE-HWKHLDTVLERLKNENLIVKKKKCKFASEETEFLGY
>gi|44829171|tpg|DAA04499.1|
PIVLVKK--K-DS-S-----LRLCIDY--RR-LNAIT--KRDSFPLPRIDAILDALS-GACWFSTLDLASGYWQVEVRPQDRKKTAFVVP-N--GLYEFQVMPFGLTNAPATFQRLMQTV--LQDTVPH-KCLIYLDDIIVYGS--TPEQ-HNANLKAVLHRLQQHNLKVKPSKCRLLQKEVVFLGH
>gi|130398|sp|P20825|POL2_DROME
PTWVVPK--K-PD-ASGANKYRVVIDY--RK-LNEIT--IPDRYPIPNMDEILGKLG-KCQYFTTIDLAKGFHQIEMDEESISKTAFSTK-S--GHYEYLRMPFGLRNAPATFQRCMNNI--LRPLLNK-HCLVYLDDIIIFST--SLTE-HLNSIQLVFTKLADANLKLQLDKCEFLKKEANFLGH
>gi|6683624|dbj|BAA89272.1|
PVLFAKK--P-GG-G-----LRLCIDY--RA-LNAIT--KKDRYPLPLIRETLNNLS-KAKWFTKLDVIAAFHKIRVAEGDEWKTAFRTR-F--GLFEWLVTPFGMANSPSTFQRYINWT--LREFLDD-FCSAYLDDVLIYTDG-SLKQ-HQEHVRKVLRKLQDAGLQVDIKKCEFEVKSTKYLGF
>gi|21104022|emb|CAD32262.1|
PIVMVPK--P-DG-T-----LRFCNDF--RK-LNEIS--KFDGYPMPRVDELLDRLG-GARFISTIDLTKGYWQLPLSEDAKEKTAFSTP-G--GHWQYRVLPFGLHGAPATFQRMMDIL--LRPHQP--YAAAYLDDLIVHSE--SWEE-HLSRLRRVLLDLRRAGLTANPKKCHLGLAEARYLGF
>gi|58698914|ref|ZP_00373777.1|
PLHMVRK--P-TG-E-----WRPCGDY--RA-LNAQT--IPDRYPLPHIQDCTHVFY-GKTIFSKIDLNRAYNQIPIEPKDIPKTAITTP-F--GLFEFTHMTFGLCNAAQTFQRYMHTA--FRDLD---FVFVYVDDIAVASA--NIQQ-HHIHLRQVFEKLQEYNLTINPSKCSFGKESIEFLGH
>gi|11527879|gb|AAG37039.1|
PIVLSRK--N-DK-------IRFCVNY--KK-LNDLT--IKDRYPLPLISDCWYYLK-DAKVFSKIDLTSGYYQIKMKEEDKDKTTFVSH-M--GQFRYVVMPFGLCNAPATFQRYMNEL--LKDELRK-SNIGFIDDCIIYSK--NNEY-HIEHVKLLFEKFKEKGAKLQITKCEFEKEEIKFLGY
>gi|115634871|ref|XP_797040.2|
AIVVVRK--K-DG-S-----PRLCIDY--RL-LNART--IKDSFPLPRIEETLEALS-GAQYFTSLDLAHGYFQIVMDRESVEKTAFRVP-W--GLYEFLRMPQGLCNSPGTFQRTMEFI--LGDMNLT-EVVLYLDDILIFSS--TLDE-HLKRLDKVMTRLQDNGLRLKGKKCFFLKEKVSYLGH
>gi|29423677|gb|AAO73551.1|
PVIFVEK--A-DG-S-----LRMVLDY--RA-LNKIT--RKRRYPMPNITELFDQLA-GAKVFSSLDLQQGYNQIRIHPDDVPKTGFIAPGM--GQFEYKVLCFGLTNAPATFQSVMNNM--FGPHIGK-FVLVYLDDILVFSK--NAEE-HKEHLRTVLEILRKNQFKAKRSKCDFNRPELHFLGH
>gi|1710054|sp|Q05654|RT21_SCHPO
PVMFVPK--K-EG-T-----LRMVVDY--KP-LNKYV--KPNIYPLPLIEQLLAKIQ-GSTIFTKLDLKSAYHLIRVRKGDEHKLAFRCP-R--GVFEYLVMPYGISTAPAHFQYFINTI--LGEAKES-HVVCYMDDILIHSK--SESE-HVKHVKDVLQKLKNANLIINQAKCEFHQSQVKFIGY
>gi|93003286|tpd|FAA00226.1|
PVVMVRK--K-DG-T-----NRICIDY--RK-LNNLT--IFDPEPMTTAKEVFNTLS-NDHYFSTIDLTKGYWQVKVAEDDIQKTAFVTP-D--GCYEFCKMPFGMKNSSATFVRGMRKL--LEGME---NVEHYIDDVIVHTR--TWND-HLATLEELFKRLARANVTARPTKCRLGAGDVDFLGH
>gi|91176517|gb|ABE26648.1|
PVVLAKK--P-LG-G-----LRFCIDY--RK-LNSIT--KLMFYPIPLVEETLEALE-GATVFSVLDLEAGYHQVRVRECDRYKTTFSTR-T--GSFQWLRMPFGLINAPFTFQKIMNTI--LSPHLHK-FVKVYLDDIMIYSK--SWKE-HLEHLDCILGILDRLALKANATKCHIAKDSVDYLGY
>gi|67625725|tpe|CAJ00251.1|
PVLLVKK--P-NG-K-----YRFCVDF--RE-LNNIT--ELKPCAMPTVVETLDRLQ-NATVFTVLDLRSGYWQLPIKESDRSKTAFTIR-D--KQYQFRRMPFGLAGAPFTFRRLMSLL--LRDLD---NVEVYGDDVVVYSQ--TETD-HAKHVEAVLKRIEEFGLRINKDKSQMAKSSITLLGH
>gi|115762719|ref|XP_001200201.1|
PIVVAAK--K-SG-D-----VRLCVDL--CE-VNKAI--VVNKFPLPDIGELFSELE-GSTVFSKMDLASAYHQLELDEESRDLTAFITH-D--GLYRFKRVCFGLASAPSTFQKMMSII--LAGLP---GVQCYLDDVIVYGK--DKGE-HDKHLHEVLAKLQAAGLRLNPKKCQFHLSEFSYLGH
>gi|91176519|gb|ABE26649.1|
PTILVPK--R-TG-G-----FRLALDY--RQ-LNDRT--IKEVCQPPTIEECLNSLS-GARWFSQLDLERGYYQVPMAKESKELTAFMTP-I--GKFQFRKMPFGLTNAPATFQCLMYKV--FRDLINT-KVCVYMDDITIYSR--TEEE-HHRDLAEVLQVLLDNGLKLGKEKSVFCTQRVDLLGF
>gi|21431873|sp|P34431|YL52_CAEEL
PVVLVKK--K-DG-S-----IRMCIDY--RK-VNKVV--KNNAHPLPNIEATLQSLA-GKKLYTVFDMIAGFWQIPLDEKSKEITAFAIG-S--ELFEWNVLPFGLVISPALFQGTMEEI--IGDLLGV-CAFVYVDDLLIASK--DMEQ-HLQDVKEALTRIRKSGMKLRASKCHIAKKEVEYLGH
>gi|68439233|ref|XP_691635.1|
PIVPVVK--K-DK-T-----LRLCGDY--KLTVNQAV--TTEIYPLPRIEELMATLS-GGTMFSKIDLASAYQQVLLEDESKELLTINTH-R--GLFVYNRLPFGVSSAPSIFQRIMENL--MRDL----DVIVYLDDLLVTGK--TEQE-HLQRLQAVLKRLQENGLRVKKSKCEFGKSQIEYLGF
>gi|805077|gb|AAC47271.1|
PMTVGKK--K-DG-T-----VRICLDA--RM-INSKM--IADCESPPAADELLRRFH-EIRYMSTIDLRSSYWQIPLSPESRQYTAFLYN-G--RSYTYQVLPFGLKTAVGSFSRAMDVV--LGTEVRE-FVVNYIDDLLVASE--TLNE-HLEHLRQVFEKLKQARMTINLEKSNFIQKEVKFLGH
>gi|49035810|gb|AAT48675.1|
PSLLVRK--K-DG-R-----FRLVIDY--RR-LNDAT--LQMHHPLPNLEDSISYLE-KSRVYSMCDMIKGFHQIDLDEDSKQKTAFSNE-F--GQFQYTRMPMGCKNAPSFFMRIMDKA--LLGVKKT-EIIAYMDDLLCHSQ--TEVE-HIKILEKLFQILAVNNLRINSKKAAFFTDSVNFCGY
>gi|415798|emb|CAA81643.1|
RIVVVRK--K-DG-T-----LRVCVDY--RK-LNTMV--LMDCFPVPIMEEVLEKLQ-SAKWFTTMDLQNGFFHVAVEEASKPYTAFVTR-E--GLFEFNKAPFGFKNSPAAFIRFVQFI--FQELINSNIMQLYMDDIIVYAA--TPEE-CMEKTEMVLKRAAEFGLKIKWKKCNFMQRRIHFLGH
>gi|57506568|dbj|BAD86655.1|
PIVPVLK--R-NG-S-----VRICADY--STGVNKQL--VVDQYPLPTITELFTRLY-GGQQFSKLDLSSAYNQLVLDEESQELTCINTH-R--GVYKHTRLCFGLASSPAIFQRAIECV--LAGVP---GTLCLLDDILITGK--NKTE-HLLRLHQVLQRLQDAGLTLQREKCEFFKDDINYLGY
>gi|67625690|tpe|CAJ00230.1|
PIVVVKK--T-NG-S-----IRLCADY--STGLNEAL--GTHQYPLPLPEDPFAKLN-GGKLFAKLDLSEAYLQIPVADECKNLLTINTH-K--GLFRYNRLPFGVKTAPSIFQQVMDTM--LQDVP---GAAAYLDDIIIMGV--DKID-LEKKLDQVLSRIAEYGFRLRAEKCNFCMKKVSYLGF
>gi|91176525|gb|ABE26652.1|
NMNPVIK--P-NN-T-----YRITVNF--VK-LNKLV--ELDKYSLPKIEEMIYNLK-EMSYFSKIDLKDGFFQVPLAEEDRFKTAFRFK-H--QLYEWNVMPMGFKNSPAIFQRVMDNA--LREEIGK-CCFVYVDDILVFGR--TEKE-HDLGLERVLKQLERNKLEINKEKTILKIRETEFVGY
>gi|1764013|emb|CAB06047.1|
QVLVARE--G-SK-K-----PRMVIDY--SQTVNVFT--ELDAYPLPSIESIVNKVT-QDKVYSSLDLRSAYHQIPLKDSDRPFTAFEAE-G--QLYQYKRLPFGVTNGVSAFQRIINRF--IQDNHLN-KVYAYLDDITVTGE--TLEE-HDRNLKKLLVAAKRHNLTINEEKSKLRMTSIDFLGY
>gi|1353154|sp|Q09575|YRD6_CAEEL
PIVVIKK--KGTG-K-----IRVCADFKCSG-LNAAL--KDEFHPLPTSEDIFSRLK--GTVYSQIDLKDAYLQVELDEEAQKLAVINTH-R--GIFKYLRMTFGLKPAPASFQKIMDKM--VSGLT---GVAVYWDDIIISAS--SIEE-HEKILRELFERFKEYGFRVSAEKCAFAQKQVTFLGF
>gi|46440837|gb|EAL00139.1|
PVLFVRK--S-DS-S-----YRLCVDY--RL-LNLII--ISKQFSIPRAEELVRDIA-GHRFYTRLDMTAAFHQLRLEASSKYYTSFSAF-G--RRYHFNVLPFGLSISPASLCEVMSEV--LDGIE---GCKSYIDDIIVYSN--TLEE-HEEILRELFSRFRKYTFYLKPTKCSFGDTTTSFLGH
>gi|91176523|gb|ABE26651.1|
PAFMIEK--K-NK-E-----LRLVVDF--RK-INNFI--FDDVAAIPKIYDNLYRVG-RSRVFSKIDLKNGFNQIELATESRDVTSFTMF-G--LQYRYKRVPFGIKSGPKLFQKTISQI--LDGIN---NCSVYIDDILIYGE--TVEE-HNETLNRVLDKLEQYHVKINFNKSEFGANKIEILGN
>gi|49035813|gb|AAT48677.1|
PLQLVRK--S-SG-G-----YRICVDM--RS-LNNRL--AESKWPLPSLAETLESLA-GTAFFSCVDIRQAFFHMALTDESKHLTAFSAL-N--CQYQFRRLPMGLKISPSVYQMAMKET--LGNDLGN-KAVVYLDDVLVTGR--TEDE-HLEALDVVLDRLRKAGFLLNPDKCILGVKKTTFLGH
>gi|39967889|ref|XP_365335.1|
STLFVPK--P-QS-KE----QRFCVDY--RW-VNKFI--KGRQVLAPDVAGTLSRCG-KARRMTKIDIIRAFNRLLMDPKSRYLTAFKTR-Q--GTFQWKVLPFGLKVGPAWFQAFINAQ--LNELLDA-FASAYADDVLIYTEDKSEQV-HFEQTEEVIYRLHKAGLQGDIKKSSFGVFEIEYLGL
>gi|49035818|gb|AAT48680.1|
PLVIVRK--K-TG-G-----LRICSDF--KSSLNQCLDETTDIWPLPQMDHLFANIEHGHRIFTSLDVSKAYWNLLIDPRDRHKTNFTFD-N--KCWMYVRLPFGLKFSGDAFCRSISSM--LDRVSLKSNFCNYVDDVLAYSS--DCET-HVKVLQQIFSACRHFGARLGAKKCTFGQASTAFMGR
>gi|88184293|gb|EAQ91761.1|
PVFVVWRTMP-DGTRK----GRMVVDI--RM-LNKIV--LPDAYPMKSQDDIMARLA-NAKYITILDAVAFYYQWLVDPRDRWVFTMNTP-E--GQYTFNCVVMGYRNSNAYVQRQMNLL--LKHID---AADAYCDDVAIGSRKFDTDDGHLAHLRRVFDALRRRNISIGPSKSFIAFPSATVLGR
>gi|68480025|ref|XP_716059.1|
PIFPIRKTNA-NQSS-----TKIAVDL--RR-LNKVT--VRMYTYPTDTKDLLSSLT-DSHYFSALDLKNAFYQVSIHKDSIKYFGISTS-E--GNYCFTTLPFGAINSPTIFTNFVRQI--LEGIP---CIFIYMDDILIHTK--TLHD-HMSLLRRIMEKLNEHQLQMNYNKMQLLTTKINFLGY
>gi|89267076|emb|CAJ41904.1|
PVFVVYH----EG-K-----PCPVVDL--RQ-LNDVV--DPDVYPLPTPDKLREKLA-GAKYITMFDLCKAFYQMLLHPDDHWKATVLTH-C--GQETLSCTIMGQSHSVSFLQQVLTEA--FKVDRLSTMAFVYVDDFGVHSN--SLDE-HMDHIHTVLGVIQTLGLTLAQDKAHVACKEVPLLGH
>gi|50550751|ref|XP_502848.1|
PVLIIIS--K-DG-E-----FRMCTDH--RI-LDDRS--INDRFWLPKTDEILSQIG-HNGVFSKLHLFSGYYQA-----------FKKP-TGLSNNVISIFPLDLREDRDNHLGLSEVLDQLGGCLSG-VAFDEFDNLIVCSK--DRET-HTADLDNVLRVLRQRHIYVNKYQSDMFKSSLELLGH
>gi|32487832|emb|CAE05063.1|
NPVLVRK--K-TG-Q-----WRMCVDY--TD-LNKSC--PKDPFGLPRIDQVVDSTA-GCELLSFLDCYSGYHQIRLKESDCLKTSFITP-F--GAYCYVTMPFGLKNAGATYQRMIQRC--FSTQIGR-NVEAYVDDVVVKTK--QKDD-LISDLEETFASIRAFRMKLNPEKCTFGVPSGKLLGF
>gi|115482042|ref|NP_001064614.1|
PAVMVRK--K-DG-S-----WRLCVDY--RQ-LNAQT--IKNKFPMPIIEDLLDELH-GAKVFSKLDLRSGYHQIRMAEGDIPKTAFRTH-L--GHYEYNVMPFGLTNAPATFQALMNQV--LAPFLRK-FVLVFFADILIYSK--TQSE-HLEHIKLVMQALSANQLVVRLKKCEFGLDRVSYLGH
>gi|19920077|gb|AAM08509.1|AC068654_11
SIVPVIK--K-NG-K-----ERVCIDF--RD-LNKAT--PKDEYPMPVADQLVDAAS-GYKILSFMDGNVGYNQIFMAEEDIHKTAFRCP-SAIGLFEWVVMTFGLKSAGATYQRAMNYI--YHDLISW-LVEVYIDDVVVKSK--EIED-HIADLRKVFERTRKYGLKMNPTKCAFGVSAGQFLGF
>gi|71148686|gb|AAZ28939.1|
PMLLLTK--PGSGIRDIPPRLRCVFDL--RE-RNDNT--VKVTSPLPDMEGILRRIA-QKPYRSSLNGKDAYECIRVEPEHVERTAMTTP-D--GNMVSLVLQQGDCNAVATYQTLMNHL--FGQYIGV-LMDVYLDDILIYSD--TLED-HVRHVQTVIDVLRREQLYLNADKLRFLCSELKVLGR
>gi|116499329|gb|EAU82224.1|
PVFIVYR----NA-K-----PRMVIDL--RK-LNESV--VPDEHPIPRQEEILQSLQ-GCKYLSSLDALAGFTQLSIHEDDREKLAFRTH-R--GLFQFKRMPFGYRNGPAVFQRVMQNV--LSPYLWL-FTLVYIDDIVIYSK--TFDE-HLAHVDLVLKAIMESKLTLSPDKCHFGYGSILLLGQ
>gi|116503598|gb|EAU86493.1|
PVFFVKK--K-DG-K-----LRFVQDY--RR-LNEIT--VKNRYPLPLVSDIINRLR-GAKYFTKFDVRWGYNNIRIKEGDEWKAAFATN-Q--GLFEPLVMFFGLTNSPATFQALMNAI--FSDLIAAGKVAVYLDDILIFTV--TLEE-HRRVVHEVLDRLKRHDLYLRPEKCEFERQEVEYLGL
>gi|39944528|ref|XP_361801.1|
PILFVPK--K-NG-K-----LRLCVDY--RQ-LNDIT--IKNCYPLPLIGELRDMLY-QAQWFTTLDLKGAYNLIRMKEGEEWKTAFRTR-R--GHYEYLVMPFGLTNAPATFQTIINHV--LRECLDI-FVVVYLDDILVFSK--TLEE-HKQHVHTVLKKLQDAKLLVEPEKCLFHSKQVNFLGY
>gi|68394906|ref|XP_699218.1|
PIVLVPK--T-DG-S-----VRFCVDY--RK-VNAVS--KFDAYPMPRIDELLDRLG-AARYYSTLDLKKGYWQIPLSPISREKTAFTTP-F--GLHQFVTLPFGLFGAPATFQRLMDKI--LGPHTA--YAAAYLDDIIIYSN--DWQR-HMQHLRAVLSALRRAGLTANPRKCAIGRVEVRYLGF
>gi|9927274|dbj|BAB08213.2|
NIVPVEK--K-NG-Q-----VRVCVDF--RD-LNRAC--PKDDFPLPITEMVVDSTT-GYGALS------GYNQIKMDLLDAFDTAFRTP-K--GNFYYTVMPFGLKNAGATYQRAMQFV--LDDLIHH-SVECYVDDMVVKTK--DHEH-HQEDLRIVFERLRRHQLKMNPLKCAFAVQSGVFLGF
>gi|116500446|gb|EAU83341.1|
PRTPSGEGKP-AS-S-----WRICHNF--RE-INKVT--EIAPMPQGEIRMKQQNLS-GHRYIHVFDFAAGFYAVTVHEDSQPFITFYVEGR--GYFAYVRMPFGVTGGPSSFAHLTASK--FHDLVAEGTCELFVDDGGAASD--TFEE-GMTKLRRILERVRREKLSLSAGKMRVFMTEAVFAGA
>gi|4544372|gb|AAD22283.1|
NPVVVKK--K-NG-K-----WRVCIDF--TD-LNKAC--PKDSFPLPHIDRLVEATA-GNELLSFMDAFSGYNQILMHQNDREKTVFITD-Q--GTYCYKVMPFGLKNAGATYPRLVNQM--FTDQLDH-SMEVYIDDMLVKSL--RAEE-HITHLRQCFQVLNRYNMKLNPSKCTFGVTSGEFLGY
>gi|92867233|gb|ABE77575.1|
NIVPVPK--K-DG-K-----VRMCVDY--RD-LNKAS--PKDDFPLPHIDVLVDSTA-KSKVFSFMDGFFGYNQIKMAPEDREKTSFITP-W--GTFCYKVMPFGLINAGATYQRGMTTL--FHDMIHK-EIEVYVDDMIVKSI--TEED-HVKYLQKMFQRLRKYKLRLNPNKCTFGVRSGKLLGF
>gi|68441537|ref|XP_694607.1|
GFFFVKK--K-DG-S-----LRPCIDY--RG-LNDIT--IKNRYPLPLMSSAFELLQ-GAQVFTKLDLRNAYHLIRIREGDEWKTAFNTP-T--GHFEYRVLPFGLTNAPAVFQALVNDV--LRDMVNQ-FVFVYLDDILIFSP--SMQV-HTQHVRQVLQRLLENQLFVKAEKCVFHAKSVSFLGF
>gi|94732925|emb|CAK05210.1|
SMVAAHK--K-DSNS-----IRICIDP--RD-LNMAI--QRPHHPMRTVEEVATQMS-NSVVFSVLDAKSSFWQISLDHKSSLLTTFSTP-F--GRYRFLRMPFGINSASEVFQRSMEQI--FAGY----PCAVIVDDILVGGR--TIQE-HDDNLEKVLARARQVNLRLNPQKCKFRLKEVSYVGH
>gi|7522604|pir||T18348
PVLFVKK--Q-GG-G-----LRFCVDY--RA-LNNIT--VKDRYPLPLVRETLNNLA-GMKFFSKIDIVSAFNNIRIKKGEEYLTAFRTR-F--GLYESLVMPFGLTGAPATFQRYINDS--LREYLDV-FCTAYLDDILIYSR--TRTE-HEEHLKLVLEALRKAGLYANAAKCEFFVTETKFLGL

#RT_nLTR: Non-LTR retrotransposon and non-LTR retrovirus RTs
>gi|18568267|gb|AAL75999.1|
RPISLVHSVAKLLTKLLANRLAGRL---HD--MVSP--NQSAFIKGRFIQDNY-MLVQQTTRYLH---QQKQPRMLLKLDISKAFDSVSWPFLLEVLQHL-GFGQVWRDIISGLLWTSSSQVLLNGLPGQPI-LH-RRGLRQGDPLSPFLFIL-VMDTLGFLINKAAQDGLLQPLAPRALQHRV---SLYADDVVIFLRPAA-----MDINVILD-CLQLFGD-ASGLRTNVQKSSVYPVRCGDQ----------DLALLQNMLPCELAEFP-CRYLGL
>gi|3461840|gb|AAC33226.1|
RPISCCNVLYKVISKILANRLKLLL---PS--FILQ--NQSAFVKERLLMENV-LLATELVKDYHK--ESVTPRCAMKIDISKAFDSVQWQFLLNTLEAL-NFPETFRHWIKLCISTATFSVQVNGELAGFF-GS-SRGLRQGCALSPYLFVI-CMNVL-SHMIDEAAVHRNIGYHPKCEKIGL-THLCFADDLMVFVDGHQ-----WSIEGVIN-VFKEFAG-RSGLQISLEKSTIYLAGVSAS----------DRVQTLSSFPFANGQLP-VRYLGL
>gi|115975815|ref|XP_001181326.1|
RPISLTCICSKLMEHIVLSHISKHV---AANNILVD--DQHGFRQKLSTTTQL-ISATQDWAHTL---QCRGQTDVIFLDFQKAFDRVPHRHLQTKLEHY-GIRGDTLHWTMSLLSNRQQAVVVKGSRSSWM-PV-TSGVPQGSVIGPALFLL-YINDI-------------------TANIQS-KMRLFADDSVIYREIHT-KNDTSILQQDLQ-TLSDWSA-KWFMAFNVKKCASLTITRKRTP---------IQHDYRISNEIIPRIDK-YKYLGV
>gi|58532044|emb|CAE05097.3|
RPICLLNVCFKLLTKVLTMRITHVA---NK--VIGE--SQTAFLPGRFILDGV-VILHEVLHELK---NSGQSGIILKLDFEKAYDKVQWDFLFDVLQRK-GFCEKWIGWIKAATTKGSVAININGEVDQFF-RT-HKGVRQGDPLSPLMFYL-VADALPEMLNKAKEAGHLQGLVPHLVPGGL-THLQYADDTILFMTNSE------ENIVTVKFLLYCYEA-MSGLKINFQKSEVIVLGVEEM----------EAQRVADLFNCKRGALP-ITYLGL
>gi|72008974|ref|XP_784674.1|
RPISLTAILCKLCEYVVHCAVIHHL---IHHDILSD--NQHGFRKRRSCETQL-TLTIHDLARGL---EDTGQYDVIVLDFAKAFDKVSHKRFLLKAKHC-GIHGLTLQWIENFLTGRTQQVILEGQLSSEA-KV-TSGIPQGSVLGPLLFLI-YINDL-------------------QDCIRHSTTRFYADDCLLYKPIRS-IQDCDKLQEDLD-RLQDWEK-TWKMEFHPSKCQVLRVTNKKKP---------LLGQYTIHGHQLEQVNS-TKYLGV
>gi|77556102|gb|ABA98898.1|
RPISLCNVLYKVVSKCLVNRLRPIL---DE--LISP--NQSAFVPGRMITDNA-LIAFECFHSIQKNKKLSSATCAYKLDLSKAYDRVDWKFLEQSMYKL-GFAHCWVNWIMSCITSVRYSVKFNGTLLSTF-AP-SRGLRQGDPLSPFLFLF-VVDGLSLLLEERVAQGALSPVHICRRAPGI-SNLLFTDDTLLFFKATS-----EQANVVMN-VLADYAW-CTGQLINQEKCSIMFGEASPP----------DVQESVRSVLQVGSTSFDDKYLGF
>gi|2636680|gb|AAC06263.1|
RPVALLSIPSKIMESLIYDGILEYL---SSSKFFSP--QQHGFRKGHSCMTNL-LTAVDRWTTIL---DRKGKVDVIYLDFSKAFDRVNHICLIKKLRRL-GIKPPLIDWLSSYLENRHFKVRVNFTLSQAM-EC-PSGVPQGSILGPLLFLI-YINDL-------------------PQQVSS-DLLLFADDVKLWREIRN-HNDILVLQEDLT-RLQSWAD-DNGLTFNTSKCKVVHLRHV------------ADHSYNLGNSPLEVSQV-EKDLGV
>gi|126295|sp|P08547|LIN1_HUMAN
RPISLMNIDAKILNKILANQIQQHI---KK--LIHH--DQVGFIPAMQGWFNI-RKSINIIQHINR--TKDTNHMIISIDAEKAFDKIQQPFMLKPLNKL-GIDGTYLKIIRAIYDKPTANIILNGQKLEAP-PL-KTGTRQGCPLSPLLPNI-VLEVL-----ARAIRQEKEIKGIQLGKEEV-KLSLFADDMIVYLENPI-----VSAQNLLK-LISNFSK-VSGYKINVQKSQAFLYTNNRQ----------TESQIMSELPFTIASKR-IKYLGI
>gi|92887570|gb|ABE88933.1|
RPISLCNVVMKIVTKTIANRLKPIL---PE--IMDE--EQSAFVQGRLITDNA-IIAMECFHWMKKKTKGKKGVMAMKLDMAKAYDRIEWSFVKSMLQSM-NFPENIINTILQCISTVSYQILINGQPSRRF-FP-ERGLRQGDPLSPYLFIL-CANVLSGLLKKEEKDNKIHGIRIARNAPKI-THLLFADDGLLFARASV-----EEAQCIIS-VLNTYQD-ASGQIVNLDKSEVSYSRNVLN----------HDKEIICQRINIKTVNTHSRYLGL
>gi|2331059|gb|AAC60281.1|
RPVSLTSVPGKIMEQILLDDMLDHM---RNERVIRD--SQHGFTRGRSCLTNL-VAFYDGVTALV---DEGKATDVIYLDLTKAFDMVPHHILISKLEGC-GFDGWTTHWIRNWLKGRRQRVVTNGSMSRWR-PV-MSGVPQGSVLGPVLFNI-FINDI-------------------DDGIEC-TLSKFADDTKLSGAVDT-EEGRDAIQRDLD-RLERWAR-VNLMRFNTAKCRVLHLGWRN-----------PRHLYRLEGAVLESSSA-EKDLGV
>gi|27817327|emb|CAD61092.1|
RPISLMSCDTKILCKALSKRIEKFI---PN--LIMN--DQNGFVLGRQAFHNI-RRVLNIVFKK----QKAKDHAILSLDAEKAFDRIEWRYLFEVLERF-GLGDGYIRWIKLLYNDPQAEIITNNQISKPF-NL-SRGTRQGCPLSPLLLLF-AIEPL-----AMAIRSSPEIKGIIIGEREH-RLSLFADDIVVFLSSLE-----LSIQALNA-LLKVFGE-FSGYKVNNNKSALLLLNKD------------EQRNYTNNRQFFNSQEE-LTYLGI
>gi|77555695|gb|ABA98491.1|
RPISLCNVCYKLVSKVLANRLKKIL---PD--VISP--AQSAFVPGRLISDNI-LIADEMTHYMRNKRSGQVGYAAFKLDMSKAYDRVEWSFLHDMILKL-GFHTDWVNLIMKCVSTVTYRIRVNGELSESF-SP-GRGLRQGDPLSPYLFLL-CAEGFSALLSKTEEEGRLHGIRICQGAPSV-SHLLFADDSLILCRANG-----GEAQQLQT-ILQIYEE-CSGQVINKDKSAVMFSPNTSS----------LEKRAVMAALNMQRETTNERYLGL
>gi|34392581|dbj|BAC82623.1|
RPITLLNTDYKIISKVIAERLKLVM---PR--LIHD--DQKGFFKDRYIGENI-RLLFDVMDFAE---TENIPCVVLSLDLYKAFDLIEWVFIETVLQGY-GL-QSVVQWVKILFGKATGTINNAGFLSESF-PI-KRRVRQGDPLSPLLFVL-AIECF-----AQHIRLNQCIEGINTADKEL-KILLFADDTLCFINGSS------GSFNAMS-EEIRWSKVVSGCKINLEKSVTCAIGSM------------VKTQSRSTAIQLKWTKESFKYLGV
>gi|34392533|dbj|BAC82594.1|
RPITIGSMVLRLFTRVINTRLTEAC---P----LHP--RQRGFRRSPGCSENL-EVLECLLRHSK---EKRSQLAVVFVDFAQAFDTVSHEHMLSVLEQM-NVDPHMVNLIREIYTNSCTSVELGRKEGPDI-PV-RVGVKQGDPLSPLLFNL-ALDPL-------IQSLERTGKGCEAEGHKV-TALAFADDLALVAGSWE------GMAHNLA-LVDEFCL-TTGLTVQPKKCHSFMVRPCRGAFTVNDCP--PWVLGGKALQLTNIENS-IKYLGV
>gi|409764|gb|AAA21792.1|
RPISLLSNVGKILEALVAKRLTQAA---EEFNLLPE--GQMGNRAGRSTEFAV-RVVTDAVHTAW---KLGAVTSLMLLDLKGAFDRVNHRWLLHTLWEM-QLPTWIIRWVASFVAGRRGSLFFDDETSRPY-AI-TAGVPQGSPLSPILFIL-FITPL---------------YRKLATIPNT-ITVGFADDTNVVAVARTTEENCRTLQAAWE-VCSEWAG-ARGMEFEATKTELMHFTRTRAP---------RTETLQLGDTVLQPTES-TRFLGV
>gi|34392560|dbj|BAC82609.1|
RPVSLLCTDYKLLSKVLANRLSDVL---SH--IIHP--DQSYCVPGRRIFDNI-SFIRDILDIGK---IFNLNFGLLSLDQEKAFDRVEHKYLWNTLTAF-GFNNEFVSMLKALYNDVESVLKFNGNLCAPF-KV-FRGIRQGCALSGMLYTL-AIEPL-----LIKIRAKLSGLSLPSCTNCF-KVSAYADDIVVLINGQI------DVTLLLE-LMNDFKK-ISATKINWSKSEALLVGNWHN----------AEPKLPEGLTWTKQG---FKYLGV
>gi|4432866|gb|AAD20714.1|
RPIALCNVLYKVISKCLVNRLKSHL---NS--IVSD--SQAAFIPGRIINDNV-MIAHEVMHSLKVRKRVSKTYMAVKTDVSKAYDRVEWDFLETTMRLF-GFCNKWIGWIMAAVKSVHYSVLINGSPHGYI-TP-TRGIRQGDPLSPYLFIL-CGDILSHLINGRASSGDLRGVRIGNGAPAI-THLQFADDSLFFCQANV-----RNCQALKD-VFDVYEY-YSGQKINVQKSMITFGSRVYG----------STQSRLKQILEIPNQGGGGKYLGL
>gi|67625717|tpe|CAJ00246.1|
RPISVAPVATRCLHKILAKRWMPLF---P----QER--LQFAFLNRDGCFEAV-NLLHSVIRHVH---TRHTGASFALLDISRAFDTVSHDSIIRAAKRY-GAPELLCRYLNNYYRRSTSCVNRT-----EL-HP-TCGVKQGDPLSPLLFIM-VLDEV--------LEGLDPMTHLTVDGESL-NYIAYADDLVVFAPNAE------LLQRKLD-RISILLH-EAGWSVNPEKSRTLDLISGGHSKITALSQT-EFTIAGMRIPPLSAADT-FDYLGI
>gi|115803132|ref|XP_001198853.1|
RGISLLSHAGKVMTTILQRRILKRT---EE--ILSE--SQAGFRPGRATTDQI-FTLRQIAEKYL---EKNRSLYCCYIDFQKAFDSVWQKGLWKAMGCF-GYPSKLIRLLQALYDQSQSTVRVNGELTEWF-KT-TVGVRQGCAISPQLFNI-LLELV------MTMAMEEVQIGAKIQGTCI-NNLRFADDIVLIAETPE------ELQTLVD-KVYKASC-DLGLKVNIAKTEVQAISKSK-----------CNLNIDIANDRLKQVED-FVYLGG
>gi|34392523|dbj|BAC82589.1|
RPITLGSYVGRCLHKCLASRFERDL---P----ISI--RQKAFRCMDGVAENV-MILRSVLDDHK---KRLAELNLVFLDVSKAFDSVSHRSILHAVKRL-GVPPPLLKYVEELYADSETFLRGSGELSPSI-KV-RRGVKQGEPLSPHLFNA-VIDWA--------LSSLDQSFGVTVGEARV-NHLAFADDIVLLSSSQP------GLQRLID-QLTTHLG-ESGLRVNSTKSASIRIAVDGKNKRWVVDPRDSVHVGGVRIPAVAVSGS-YRYLGV
>gi|3559772|gb|AAC34904.1|
RPITISSIVLRLYTRILARRLERAV-------QINP--RQRGFVPQAGCRDNI-FLLQSAMRRA----KRKGTLALGLLDLSKAFDTVGHKHLLTSLERF-AVHPHFVRIVEDMYSGCSTSFRVGSQSTRPI-VL-MRGVKQGDPMSPILFNI-ALDPL-----LRQLEEESRGFMFREGQAPV-SSLAYADDMALLAKDHA------SLQSMLG-TVDKFCS-GNGLGLNIAKSAGLLIRGANKTFTVNDCP--SWLVNGETLPMIGPEQT-YRYLGA
>gi|115901733|ref|XP_796756.2|
RAITLLSIPGKVFCRMVLMRIQGTI---EN--HLTE--EQCGFRSLRGTTDAV-FVVRQIIEKAR---ERRIPIHLNFVDFKAAFDTIWREALWKCLRSI-GVDKPLVDLIESMYKQTKCSVMVNGKITEWF-DV-ITGVRQGCLLSPSLFNL-FLEYV-------MKDIQQLESGIQMGDMRI-NNIRYADDTTLMELIFE------NLQISTN-ELEKACR-RWGMKINATKCKVMTE---------------DHQDISLNNTNIEKVEK-FVFLGS
>gi|130551|sp|P16423|POLR_DROME
RPISVPSVLVRQLNAILATRLNSSI---N----WDP--RQRGFLPTDGCADNA-TIVDLVLRHSH---KHFRSCYIANLDVSKAFDSLSHASIYDTLRAY-GAPKGFVDYVQNTYEGGGTSLNGDGWSSEEF-VP-ARGVKQGDPLSPILFNL-VMDRL--------LRTLPSEIGAKVGNAIT-NAAAFADDLVLFAETRM------GLQVLLD-KTLDFLS-IVGLKLNADKCFTVGIKGQPKQKCTVLEAQ-SFYVGSSEIPSLKRTDE-WKYLGI
>gi|34392539|dbj|BAC82597.1|
RPITCLNCLLKVYTSILKMKIENQLMLNPIEKQLSL--NQIGCKKYTYASKEG-LLYNTIINQLLL--KTKWKWVETYYDVSKAYDSINHQWIKQCLIYF-NILLVVINSILYILNNTYLNLYYNQESDNMI-NV-ERGIIQGDSLSPLLFIL-SIDVLSKQLDKQISKLNI-KMNGEEKQVQL-NHILYMDDLKIMTNSLD------EMEKAHK-LTKEIFN-AIGLKINLEKSGIMTNISG------------KINGELDELPRVTNDNP-YKYLGI
>gi|134083|sp|P21328|RTJK_DROME
RPTSLLPSLGKIMERLILNRLLTCK---DVTKAIPK--FQFGFRLQHGTPEQL-HRVVNFALEAM---ENKEYAVGAFLDIQQAFDRVWHPGLLYKAKRL--FPPQLYLVVKSFLEERTFHVSVDGYKSSIK-PI-AAGVPQGSVLGPTLYSV-FASDM-----------PTHTPVTEVDEEDV-LIATYADDTAVLTKSKSILAATSGLQEYLD-AFQQWAE-NWNVRINAEKCANVTFANRTG----------SCPGVSLNGRLIRHHQA-YKYLGI
>gi|19067879|gb|AAK14815.1|
RGISLTNIVSKILASIILRRLTKAH---EE--QTRE--NQGGFRPGRGCIDQI-FTLRQVLEHRH---TFRRPTIAVFLDLKAAFDSIDRKVMWQCLSLK-GVPEKYINLIQALYSNTTCRVRAYGRLSSEL-TT-SSGVRQACPLSPFLFNF-IIDIL---LELTLSSSDFPGVDLFPGD-KL-TDLEYADDIVLLSEDAD------KMQDFLT-TLNMNVS-MLGMRFSPSKCKMLLQDWLN-----------SAPKLVIGRETIECVNR-FTYLGS
>gi|34392572|dbj|BAC82617.1|
RPITMLNTDLKILTKILANRLKEVM---PK--IIKT--TQAYAIKGRDIADIT-MSIKDIIEYMK---EKKEEGYIISLDFEKAFDRVEHQFLFKVLKKF-GFGEVFRKWIKILYKGILTKIKCNGFLTECF-KI-TRSIRQGCPLSALLYSL-VAEPL---GLAINEEEKIKGIEIEENKVNK-KMFQYADDTTLIVKGKE------SVKEAMK-IVQQFCK-GSGSKVNEDKTVYMKFGKETD---------------LAECTNFKEVEE-IKILGV
>gi|68359717|ref|XP_688700.1|
RPIALTPIIMKCFERLVMQHIKSVL---PP--SLDP--FQFAYRPNRSADDAISTALHTALTHLD---KKDSCVRMLFIDFSSAFNTIIPQQLSQKLLQL-GLNTSLCNWLLDFLTGRPQAVRAGSNTSSTI-TL-NTGAPQGCVLSPILFTL-LTHDC-------------------APSHNSNLFIKFADDTTVVGLINK--NDEENYRSEVS-RLAEWCR-DNNLFLNVEKTKEIVVDFRKEHT--------LHAPLTINGATVERVSS-TKFLGV
>gi|141475|sp|P14381|YTX2_XENLA
RPVSLLSTDYKIVAKAISLRLKSVL---AE--VIHP--DQSYTVPGRTIFDNV-FLIRDLLHFAR---RTGLSLAFLSLDQEKAFDRVDHQYLIGTLQAY-SFGPQFVGYLKTMYASAECLVKINWSLTAPL-AF-GRGVRQGCPLSGQLYSL-AIEPF-----LCLLRKRLTGLVLKEPDMRV-VLSAYADDVILVAQDLV------DLERAQE-CQEVYAA-ASSARINWSKSSGLLEGSL------------KVDFLPPAFRDISWESKIIKYLGV
>gi|7508572|pir||T25352
RPISLMPVIYKLYSSLWNRRIRAVP---N---VLSK--CQRGFQEREGCNESL-AILRTAIDVAK---GKRRNLAVAWLDLTNAFGSIPHELIEYALTAY-GFPQMVVDVVKDMYQGASMRVKNATEKSDRI-PI-MSGVKQGDPISPTLFNI-CLETV-------IRRHLESANGHQCLKTRI-KVLAFADDMAILTDSPD------QLQRELS-KLDNDCT-PLNLIFKPAKCASLVIQKGVVRSA-------SIKLKGNAIRCLDENTT-YKYLGV
>gi|2708259|gb|AAB92389.1|
RPISLSSFLLKTFERLVGLQLRTTI----NPQWLSG--AQHAYRKGKSTETAL-HEVISAVEKSL---HVKEYSLIAFLDIEGAFNNVIPGAITEALTDL-GVDRHLVMLIDQLLTCRTVTSSMGSSTQSRY--V-NRGTLQGGVLSPLLWNI-AVNKI-----------------LCDLEGEGCKVVAYADDVAIIFSGKFPQTLCELMTAKLA-RLSEWTK-SRGLGINPSKTELVLFTTKYKIP--------SLNPPILNGCRLSFSDS-ASYLGL
>gi|7496780|pir||T19605
RPISLLSPIAKLLEKAILKRIKNSI---ES----PA--HQHGFKPEHSTTTAV-IQVTNDIIGGLNMKNPPERAIMACLDLRAAFDKVPTKKLCNDLMEAQGIEPKIKLWLGNYLHKRMIRTNHYNHWSKWH-TL-LGGVPQGSVISPNLFTF-YLKDM-------------------PIQQDT-MLISYADDTSIIARDKKIEKAAGKVQLHID-EIAKYLK-ERGMSISAEKSTVTVFSCDPKEHK-------TKPDIYWMDDPIPVTNA-PKLLGI
>gi|46097581|gb|EAK82814.1|
RPLTVANSDYKLFTGILAKRLCSAL---NG--VVGP--HQYAFLPGRLIDDNI-RLVQSIIDENQG--SETEGVYLLFIDQEKAYDRVDHKFLWRLLKQV-GLPEPIRHAIKALYANVKLKVMVNGFASKPF-PV-RSGVRQGDPLSCILYVL-FLEPL------IRKIQTSEIEGITIPNSAPIKAVCYADDTVLVLKNQT------EVDLARS-ILQDFCE-GTGAQINWNKSSILKVGN-------------PPPITIPEVSFVSPDNP-YFHLGV
>gi|283590|pir||PC1123
RPIALTSCICKTMERMINSRLVWYL---ERNKVISN--YQCGFRQGRTTTDHL-VRLEAYIRNAL---LRREHLVAVFFDIEKAYDTTWKHGILRDLARM-GLKGHLPRFVEEFLKDRKFQVRVGNSTSDTH-DQ-EMGVSQGSILSVTMFNI-KINSI-----------------INALSPGI-ECSLYVDDFVILTYGKNMNTLERKLQLCLN-KIQGWAK-YNGFKFSDSKTVSMHFCNLRGLH--------LNPELFIHKKKIPVVKT-TKFLGL
>gi|34392547|dbj|BAC82601.1|
RPITICRTLYKLYAAVIARRIQTWA---KQGGVLSR--LQKGFMPVEGVFEHV-FMLDTVLSDAK---LRRKNLLAVFLDVRNAFGSVRHECLLKVLRHF-DAPHYLVELVRDIYTGATCRVRSSVGETGDI-PC-DRGVRQGYPLSGILFNL-VTEVL---IP--GLSAGNDGYRMACLGGKLTQVLAYADDLVVVTENRD------QMLRQLG-VCEEFGR-WAGLAFNQRKCGLIGWRTLRGGRRVALED--PLLLNGVEIPLLRPGEH-YKYLGA
>gi|5410432|gb|AAD43055.1|
RPITLANCIYKIHSKLINNRIIPIL---TK--VINH--NQKGFVPGRFIIDNI-ISMNELINYCN---DKRINGIITLYDFEKAFDSISHGSILRSLQHI-NIPTNIINLIMNLLTKSEARIEINGRTTIPF-EI-KRGVKQGDPLSPTLFVL-VIEAL---ARKILQDDRITGLPLNNSNHRE-KFQSFADDSASMVPDSQ------QLELVLQ-HFNSFCK-ATSSKLNIDKSSSILIGNPDN-----------------TNQRIPISTNPERYLGY
>gi|2735953|gb|AAB94030.1|
RPICLLPALGKIYEKLIVNRLWHFV---TINKALSD--NQFGFVPYRSTTMAI-DKLLGTFRHFE---DERCVTLLVSLDISNAFNSVWYPSVLRYLRQN-RFPGNLIDIIVDYFRDRTISVRFGSTRVTR--NV-VRGCPQGSVLGPLLWNM-VIDPV-----------------LRERLPGGAILQAYADDLVLAVPGKSRVDLLGKAVDCLS-TVREWAG-RSKLALDTAKSKAMVLNSKYR----------SLDLSHHLVGGIKVEKE-LKYLGL
>gi|4388654|emb|CAA29181.1|
RPVTLTSCLCKVMERIIAARLRDTV---ES--QLTP--QQSAFRPGCSTLEQL-LHVRAALCRP----THQSRTGAVFVDY-KAFDTVDHDKIAREMHRM-KVSPHIVKWCVSFLSNRTGRVRFKEKLSRSR-TF-ERGVPQGIVLGPIMFII-VMNSL----------------SQRLAEVPLLQHGFFADDLTLFSRHTERNVINHTLQCGLN-VVLQWSK-EYFMSVNVAKTKGTLCGCIER----------HPLTLQLDGERIGADRT-PKLLGV
>gi|4049661|gb|AAC97621.1|
RGINLINWACKLYSKILNNRLKPIM---EN--LISE--EQSGFRKNRSIKDNI-YILHEIIR------NRKKETYFAFIDFKKAFDNVDREILWNIMHLH-GYPPHLINAIKSLYENTRIIVK-----SKVI-KI-NKGIKQGCAVSLSLFNI-YIDHI---MN-EWKQHNIKGIEL-NDNTNL-NYILYADDLVIISTNKN------DFIHGID-MLNNLSK-KYKLPISFEKTKVMAFKGTET----------INIEIYIDDNLIQQVDC-FTYLGY
>gi|7507973|pir||T25005
RPIALTHPLSRLFERIVLNPIMKTF---SP--KISK--FQFGFLNNRSCTTAL-LNASSIYHKILA--DPNQYIDIVLFDFAKAFDSVPHELLLSKIRNF-GVDDNLCAWFRSFLSNRVSKVKIGDCLSDSSYKN-SSGVLQGTVTGPFLFLI-YINDI-----------------LEQFPPDV-HAMAFADDLKLFSNNCK------SLKSSIS-LIEAWCT-KWQLNLAENKTNVLHIGKKN-----------PKCEYYVNGQKIHSCSK-ARDLGI
>gi|11323019|emb|CAC16871.1|
RPISLLSCLGKTLEKIIAQRLTWFI---KRHNLISH--NQVAFKSNHSTMDAL-LRIQHFASNAL---STKNHVSILATDFERAFDRVGIHAVLCRLERW-GIGPRLYNLIKAFMTNRSFRVRINNVTSNSH-IL-HNGIPQGSPLSVVLFMI-AIEDI---------------NDIVTRHKDI-YISLYADDAIIFTKIKNINTVREKFLEILQ-EINSWGA-TSGASLAIEKCQTLHICRKQRC---------NLSDIVFNSRTIKDVNF-LKILGI
>gi|87162631|gb|ABD28426.1|
RGIKLMSHTMKLWERVIKRRLRKET-------LVTD--NQFGFMLGRSTMEAI-YLLQRVMERYR---TDKKDLHLVFFDLEKGYDRVPREILWKALEKK-RVRIAYIRAIKDMYERASTSVKTQDGTTEDF-PI-TIGLHQGSTLTPYLFTL-VLDVL--------------TEHIQELAPRC---MLFADDVVLVGESRE------EVNGRLE-TWRQALE-AYGFRLSRSKTKYMECNFSGRRSR-------STLEVKVGDHIIPQVTR-FKYLGS
>gi|2290213|gb|AAB65093.1|
RPISLTSFLLKCLERIIDHHIRDVY---LANMPLHV--NQHAYQSGKSTVTLL-HKVVYDIEKAF---AQKQSCLGVFLDIEGAFDNVSFDAILEAARNH-GLPTMITNWIHQMLKNRHLFSTLRQAAIRKL-SV--CGCPQGGVLSPLLWNL-VADTL-----------------LRQLNNCGFPTYGFADEYLALIVGMCISTLFDLMQSALQ-VVESWCR-QYGLSVNPNKTSIVLFTERRNRD--------GIRPLRLFGTEINVTDQ-VKYVGV
>gi|34392589|dbj|BAC82628.1|
RPISLLNTDYKLLSKVIKPRLDCII---GKWGIIST--AQKCCNKPCNIFQAV-LSVKERVVDLK---MKRKCGKLVSFDLSQAFDRVDRGFLFNNMVSM-GFNPGLVGLLRRFGDQSSSRILVNGSLSPPI-SI-RRSVRQGDPLSMHLFIL-YLHPL-----------ITRLEGICCDQDDL--VNAYADDISVVTTSSQ------KIELVRE-AFEAFGR-VSGARLNVDKTIALDVG--------------YTTSNAIQVPWLRTVER-LRLLGI
>gi|1549144|dbj|BAA07467.1|
RPIGLLPVLGKLYEKMLVARLKYHL---LP--RMST--RQFGFMPQRSTEDSL-YTLMQHVKEKL---KEKRIITIVSLDIEGAFDSAWWPALEVRLAEE-KCPEYLRRVISSYLSDRRVSVRYAGAEYER--AT-SKGCVQGSIGGPILWNL-LLDPL-----------------IHQLQARGEYIQAFADDVVLVFDGDSALQIERQANTSLE-HVQAWGV-RNKLKFAPHKTCAMTITRRLKY---------DTPRLNMGGTEIATYKE-LRILGL
>gi|3073779|dbj|BAA25763.1|
RPITLLNTDYKLAARAIASRIGPLL---NQ--VVDA--TQTGFLPKRWAGDNV-LAHLEEISYLE---ATHQPGVQVFLDFEKAFDRLDRAWIERCMAAV-GFGPGVQRWVHILHSGTTSRVAFNGWHTDAF-PV-AAGVFQGSPLSPLLFVL-ARAPMAAHARMLAGQLAFQPIRLPSGEPAP-VMHQHADDTSVHARTPG------MLRSCWGPSVGLHCA-ATGARLQRSKSQALGLAASAI----------SPGPIQSRGVTFAASSDGVKHLGI
>gi|83776057|dbj|BAE66176.1|
RPISLLATLGKVLESVVAERISHAV---ETHGLLPT--SHFGARKQRSAEQAL-VLLQEQIYAAW---RGRRVLSLISFDVKGAYNGVCKERLLQRMKAR-GIPEDLLRWVEAFCSERTATIQINGQLSEVH-SLPQAGLPQGSPLSPILFLF-FNADL-----------------VQRQIDSQGGAIAFVDDFTAWVTGPTAQSNREGIEGIIK-EALHWER-RSGATFEAEKTAIIHFTPKTSKL--------DREPFTIKGQAVEPKDH-VKILGV
>gi|115971292|ref|XP_001187179.1|
RPVALTPIAMNSFERIILKSLLQPI---RE--LIDP--HQYAYQQNKSVQDAT-LYLTHLLYKHTE--ETKSYVRALFVDFSSAFNTIRPHVLVEKLKRL-EVRPSLILWIVDFLQNRTQQVREKNTMSESI-VT-NIGSPQGCVLSAILFVL-YTNDC------------------RSSSENV-SVLKYADDTVIVGNIRG---SETEYEDYLN-WFTEWCN-ENFLDFNTTKTKEMIIDFRKVRPVDP-----SSCPMKINGKEIEIVKS-YKYLGT
>gi|115670804|ref|XP_001196820.1|
RPISLLCHTYKLFERLILNRIAPFV---DE--HLIP--EQAGFRPGKSCTGQL-LNLTQFIEDGY---ESKLITGAAFVDLSAAYDTVNHRILTRKIFEL-TKDVRLTGLIQTLLSNRRYFVVLNGNRSRWR-RQ-KNGLPQGSVLAPLLFNV-YTNDQ-------------------PIHPNT-RSFLYADDLCIATQNQSFVKLEESLSDALA-GLIPYYA-TNHLRANPDKTQISAFHLKNRDAN-------HQLRISWYGKRLKHTPN-PVYLGI
>gi|34761706|gb|AAQ82023.1|
RPITIQSSAIKILENAMLQHVQKLK---DEGKVKDFHISQCGFQKNRSTIINI-CRTIALIQSTV---AKKENRVAIFVDVKSAFDSVNHEQLFQALRNQ-GFDDIFIKSVAFLYQHC----RINGY------QI-GRGVIQGGKLSPILFNY-LYEEV--------RVKILAIWKSKKLDHQDLHFELFADDMLIILKKYK------LTATLLE-VLKQAYS-EINLQINESKTKIMLIGKQETYI--------KDSLRLRQAKDIDLVME-FKYLGL
>gi|6635955|gb|AAF20019.1|
RPISLTCCASKILERMVNRRLIRFL---EDNQFLDH--RQHAFRPGHGAETYF-TGLGDVLQDAM---GKGLHADMASLDLAKAYNRAWTPHAIRRLADW-GLCGHILHFLKNFLKGRTFQVIIGNNHSSIR-AE-ETGVPQGSVIAVTIFLV-LMNNI-----------------FEALPKEI-YIFVYADDILLVVIGRTLKFIRRKLQAAVS-AVARWAA-NSGFDLSAEKSVISHVCRSRHRV--------LQTPVMVNGCPIPCRKT-MVILGV
>gi|556020|gb|AAC13649.1|
RPVTLLPVLGKILEKVLLQCAPGLT----H--SISP--RQHGFSPGRSTVTAL-RTLLDVSRA-----SEQRYVMAIFLDISGAFDNAWWPMIMVKAKR--NCPPNIYRMLTDYFRGRRIAV-VAGECAEWK-VS-TMGCPQGSVLGPTLWNV-LMDDL---------------LALPQGIEGT-EMVAYADDVTVLVRGDSRAQLERRAHAVLG-LAEGWAS-RNKLDFAPAKSRCIMLRGKFQ----------RPPIVRYGSHVIRFENQ-VTVLGV
>gi|140023|sp|P16425|Y2R2_DROME
RGICLLPVFGKVLEAIMVNRVREVL---PEGCR-----WQFGFRQGRCVEDAW-RHVKSSVGA-----SAAQYVLGTFVDFKGAFDNVEWSAALSRLADL-GCRE--MGLWQSFFSGRRAVIRSSSGTVEV--PV-TRGCPQGSISGPFIWDI-LMDVL-----------------LQRLQPYC-QLSAYADDLLLLVEGNSRAVLEEKGAQLMS-IVETWGA-EVGDCLSTSKTVIMLLKGALR----------RAPTVRFAGRNLPYVRS-CRYLGI
>gi|20148855|gb|AAM12686.1|
RPIAIGKTVTNIFHRVLLKRLIRHA------NYLSC--EQIAFKQNAYAV-GV-RRAHEL--------ISRPGMHAVSLDTKNAFNSLPRAEVVRALNEA-GVPKVLVDYIRNFLDLRHSRDV----------KCEVCGVPQGDPLSTFLFCM-AIERL----------------LRRLKERGI-TFLAYADDIVAFHDEGY------PAGVITQ-QATAEAA-AMGLTIRSDKCKSTMAGEE------------------------------VTFLNH
>gi|1435079|emb|CAA67543.1|
RIVSLLNCMGKVAEKLVAFRLAQLC---EDKSLLHT--GQMGGRKHRSSQDAV-MALVHDIELGW---SRGLTSSALLLDVKGAFDNVSKVRLLESS-GM-RIPKPLVEWVSSFMSDRLIALAFDGSKEELQ-PV-NTGIPQGSPCSPILFLI-YLKPL--------------FNELERHKLNI-QTPSYIDDVAIMLTGKSTVKNAATLQKAAV-IAFEWAR-GNAIAFDDSKSELIHFANTNKVP--------TCPMVLPNGTELRPLPS-VRWLGI
>gi|118791936|ref|XP_001238246.1|
RGITVLNTAYKIFSLILQDRFVPHV---EE--IVGN--NQRGFRNGKSTTDQI-FTMRQILENLD---EYRNDTYHLFIDFKAAYDSIARVKMYDAMSSL-GIPAKLIRLVRMTMTNVTCQVRVDGKLSGPF-AT-TKGLRQGNGLACLLFNL-TLERA-------IRDSRVETTGTIFYKST--QILAYADDIDIIGLRRS------YVAEAYQ-GIEQAAE-SLGLQINEAKTKLMVA---------------TSADLPINNPNLLVPE--FTYLGS
>gi|115737728|ref|XP_001203833.1|
RPIALLNVEAKMFFAIPAKRLETYM---RKNGYLDTTVQKGGVGGHPGVWEHV-ATLWEVIKDAK---TSQKNLVAIWLDLANAFGSVPHAAIAFALKWY-HLPESLVSLMNNYYVGLYARFSVKDWNSEWQ-KF-SVGIFMGCTLSPILFVI-TFNLL----NDFLKSTPAKQYHLKKRDFNVPVMKEYMDDITIITASVE------SAGSILS-KVNDFMD-WSKMRIKPVKSRSLVVHGGKVKHI-------EPFAVDGQTIPGVHNKP-VKFLGR
>gi|77819847|gb|ABB04052.1|
RPIAVQETLLVAFHRLLLRRTPALR-------KLPA--WQLAFEH---------LAQMKAIRAAE---ELKRTHHLLTVDVRNAFNSVPHSVILFALRRA-GVVQPTVAYIESFLAARHSSDL----------PAVPAGVPQGDPLSMAMFCQ-SLVWP-----------------VETYLGQY-KVVAYADDLVIASEEAI------PIDTVKS-DAQSALS-RIGLTVELSKCSSTQAGA-------------------------------ISFMGT
>gi|4322565|gb|AAD16096.1|
RPITISSMVSRVYSGLLDQRVRAVI-------KQCD--RQKGFTEENGCFSNI-QLLDDAVSN-----AKKAGGVITILDVSKAFDTVPHAVIQGCLEKK-GIPETVAAYISNMYRDCSTAIRTRSGDVKI--GM-KRGVKQGIPCHLSFSIW-VLEPL--------LERLQETSGVEIEGMNL-SCAAFADDIVCFANTAP------EAGRQLR-MVADYLG-RLDMSLSVSKCIAVEYVPHRKTWYTKNP---GLEVNGNTVPSISPSET-FKYLGA
>gi|57227301|gb|AAW43760.1|
RPIAVGELIYRLCAKAILRSYFHTD-------FLLP--YQLGVKSPGGVEPIV-RAAERALEGSL----GAEYTHLASLDATNAFNRVDRKVMADAVEKH---APVLWRTCKWAYGEPSDLICGDTILQS------SQGVRQGDPFGPLFFSI-ALRPT-------------LHALSIALGPDT-QAVAYLDDIYLFSNDPN------VMQRTQA-FLAD--K-ENVIKLNNNKCKQVTFT--------------------------EMAENGFKMLGT
>gi|68399910|ref|XP_684355.1|
RIISLLSVEGKVFFSIVSRRLTEFL---LENNYIDPSVQKGGIPGAPGCLEHT-GVVTQLIREAH---ENRGDLVVLWLDLANAYGSIPHKLVELALHRH-HVPSKIKDLILDYYNNFKMRVTSGSETSSWH-RI-GKGIITGCTISVILFAL-AMNMV-----VKSAEVECRGPLTKSGVRQP-PIRAYMDDLTITTTTVP------GSRWILQ-GLERLIA-WARMSFKPSKSRSMVLKKGKVVDK-------FHFSISGSVNPTITEQP-VKSLGK
>gi|624681|gb|AAB40036.1|
RPITPESALMKLAAHIALDSVEKSF---RS--TFKG--WQYG------VWGDS-TEAVKRIREAY---AEASSDTLVALDATNAYNRMSRRHILEAAYAQPELRFAFGVVNLSLGAAGELALYENGAKIHAL-KS-TEGVRQGMVLSPLLFAN-AMSGI--------------IRPLMEMHPRV-KVVAYLDDVTLIGPHAA-------VQDFLA-EAGPQLS-RVGFDINPAKSHHLAKLE-------------VPEALSVSGRTIPIAQGVVRILGA
>gi|116498345|gb|EAU81240.1|
RTIGLESCLLKFMTMLVNARLVQWA---ECRGLLPP--SQNGFREGYRTNNNM-FILRCAIDKAK---ASRKPLYVAFVDMTNAFPSTDQPTLWTKLRAW-GAGGKVFDWIRKLYREMEYVVRHNNEQSEAF-RA-TIGILIGDTCSPILWVL-YMADL-------PQWIPNDDDDVVLGTTPV-TNLEQADDILLLSTTAR------GLQRKMS-GLFRWCG-RNFMIINSVKSEVMVFGTRST----------DMPQFRFGDEVVSVVDA-QSYIGF
>gi|134087|sp|P15594|RTP2_TRYBG
RPIGAESVWAKLASHIAISRVMKTA---EK--KFSG--IQFGV--GGHIEEAI-AKIRK---------DFATKGSLAMLDGRNAYNAISRRAILEAVYGDSTWSPLWRLVSLLLGTTGEVGFYENGKLCHTW-ES-TRGVRQGMVLGPLLFSIGTLATL---------------RRLQQTFPEA-QFTAYLDDVTVAAPPEE-------LKNVCA-ATAEAME-ALGIVNNADKTEVLELTGDTG-------------------------------FGT
>gi|7505997|pir||T23706
RPISLTDPFVRVMERIICSRIRADF---GH--LLSP--HQHGFLHYRSCPSSL-VRSVSLYHSLL---KKEKSLDIIFFDFAKAFDKVSHSILLGKLAKF-GLESLTCSWYKEFLENRTFSVKINKFVSKNSYPI-SSGVPQGSVSGPLLFIL-FINDL-----------------LIDLAPTI-NISCFANDVKIFHTDPT------IIQNSID-IIVSWSK-LNELPLAPTKSALLALGTRN-----------KNQSYSVDGVPITPSST-VRDLGL

#RT_DIRS1: RTs in the DIRS1 group of retransposons
>gi|22415757|gb|AAM94957.1|
ERLAEVPSYLLPEDWLYTTDDKSGYWQLSLHEREHTYLAMRWR----GQTLFWPHLPFGLAPACHLYTSMKLEVFRPLRQL-GVRMSF-LIDDQMGAAGSKAAAQFQCGAVVRLLAALG-FTLSLSKCQLIPRRRVRFLGM
>gi|68371094|ref|XP_689703.1|
LTQRRILQCVRPRDWFAAIDLKDAYFHVSILPRHRQFLRFAFE----GRAWQYKVLPFGLSLSPRVFTKLAEGALAPLRLA-GIRILS-YLDDWLILAHSREQLIVHRDEVLRHLRLLG-LQVNREKSKLAPVQRISFLGM
>gi|903714|gb|AAA70202.1|
EGIKNLPSMVKQGYYMVKLDIKKAYLHVLVDPQYRDLFRFVWK----GSHYRWKTMPFGLSTAPRIFTMLLRPVLRMLRDI-NVSVIA-YLDDLLIVGSTKEECLSNLKKTMDLLVKLG-FKLNLEKSVLEPTQSITFLGL
>gi|17066696|gb|AAL35360.1|
LTYKVLCSSIRPNDWFVTIDLADAYFHIAIYPAHRKFLRFAYQ----GAAYEFQRIPFGLSLAPRVFSKCVEAALFPLRNS-GIRIFS-YIDDYLVCSHSREQVITDSVTVLRHLRNLG-FTVNETKSRLEPSQYTDYLGL
>gi|25229104|gb|AAN71721.1|
DQAICLIKSVGRNAWLAKVDISSAFKIMPLHPDFWHLFGINWR----SKFYFAVRLTFRCKSSPKIFDMLSEAICWILTNNYGVSHLIHLLDDFLIISLPSEPPARQLAITQKVFANLG-IPLAEEKTA-GPSTSLEFLGI
>gi|115621288|ref|XP_001198299.1|
DEAVKLVVALGRNAFMGKSDIKSAFRLLPVNPADFDLLGMCFD----GQFYFDRCMPMGCSVSCAVFERFSSFLQACCRRIASSQGILHYLDDFFFVGRAADECAHLMRCFRAMCDRFG-IPIADEKTE-GPVQVITYLGL
>gi|115933520|ref|XP_001177444.1|
EHLATILPSIGPEDWVVSLDLRDAYFHEPIHPRSSDLLGFAFR----GETFRLKALPFGLRPAPRVFTRVVSALTAFLRRQ-GLRLFA-YLDDWLLVASSELRLREHLSLLLQVTQDQG-FLVNWEKSELSPTRRLVYLGA
>gi|68388247|ref|XP_694086.1|
LTISTIVSQIQSKDWFVTIDLKDAYFHISILSSHRKFLRFAFG----GKAYQYRVLPFGLALSPRIFTKVVDAALAPLRLQ-GIRILN-YLDDWLILARSRELAVQHRGVLWDSTTMFACLSPTRIESIRAAAKRIR-LGQ
>gi|115686250|ref|XP_001200766.1|
QTLVSNLPMIERTDWAVSLDLKDAYFYVPIHPRMLDLLGFAFE----GETFMFCALPFHLRLAPRVFTRVVAALAGFLRNR-GLRLFV-YLDNWLLLAISEAVLRVQFACYSRPLRSLT----GLCGAFCAGPRGQHYDGG
>gi|39594845|emb|CAE70713.1|
EDWRAVWSFLEKANYAATFDFKSGYHHIKIADPSSDLLAFSLSDPPLAPFYKFTALPFGLSSAPWLFTKVFRPLVGRWREK-GVKIFL-YIDDGLILAKTREEAVEAVRLVREGLAAAG-VTVEEEKSFWTPSEQFTWLGI
>gi|10058|emb|CAA43185.1|
ENVAIAKSLIPKSGFMLTFDMKSGYHQARMADSELIYLAFRWE----GKTFWMKALPFGLSSAPEYFTKLFRHPLATLRGD-GVNCLL-YLDDLLVWSETYEGACEASAKVRALFGKLG-VVLNNEKSSVTPQREVKWLGV
>gi|115939600|ref|XP_001192693.1|
DNIHTAKHLISPHCYLASIDLQDAYYSIPVDPNSRKYLRFMWQ----GERWQFAALTNGLSTAPRLFTKLLKPVFAELRQA-GHTVIG-YLDDTINIGETKEKLKESVMRQHFENRGLSRRTVDIITASWRASTCKQYQVY

#RT_pepA17: RTs of a multifunctional enzyme in retrotransposons, and C-terminal to the RT domain is a domain homologous to aspartic proteinases encoded by retrotransposons and retroviruses
>gi|115702688|ref|XP_788446.2|
RIVFNSSASF--QGHRLNEYWMKGPDLLNNLIGVLLRFRENKVALCGDISKMYHRVSIPESDQHVHRFLW----RDMDEHREPDIYMMKVVTFGDKPAPAIAQTALKLTAEQGEST-HPRAASVLKRNVYMDDICDSVRTVDEAR-KLSAEMDEVLNEGGFKVKGWI-SNESDVGDL--TQGKMKLLDEIAEE-------KVLGV
>gi|115613219|ref|XP_790598.2|
RVVFNCPISY--KGKSLNQELLQGPDLTNRLLGVLLRWRKEKVAIMADIQSMFYQVKVTPDQCDMLRYLW---WPEGDITKEPVAYRMLVHLFGATSSPSCSNYALKRTAKDNEGCAKEEVLDAIQKDFYVDDFLKSVSTPQEGI-DLAESLRQVLSKGGFKLTKWS-SNRREVLDSIPKEEHAVELKDLDLQREVLPTERALGV
>gi|44829169|tpg|DAA04498.1|
RVVLDCAAKF--AGVSLNDMIYQGPDTTAELVCILLRFRKEAIAICADVEEMFMQVKVPESDQGALRFLW---WQETDMSKEPSEFQMTVHPFGATSSPFCANFALIKTAQTFSDGFDSYIVEAVKNNFYVDDCLVSFSTSNQAK-NFVKQVSELLCKGGFALKKWI-TNSVEVRSVL--HGVCKEGPVMEMSRDCDVIHRTLGV
>gi|33327733|gb|AAQ09229.1|
RIVFDAASRY--EGKSLNDALLPGPDLLQSLFGVLLRFRQGPVAVVADIKEMFLQIKIREQDRDSLRFLW----RGEDRASKPREYRMTSVIFGAASSPATAIFVKNRNAEEHQAS-HPEAVKAIVRNHYMDDYLQSFATIEEAI-DTAATVDSIHKEAGFELRQWA-SNEQRVLDGLQREEASPTEVAIGSNEE-----KTLGL
>gi|115925893|ref|XP_001180941.1|
RVVYDCSAQY--KGESLNDYLLTGPDLTNALVGVLCRFRRDEIAFSCDIKEMFHQFKVREGHRDYLRYLW---WKDGDILQEPIELRMTVHLFGASSSPGCSNFCLKQTATDHAAEFGNDVKDFIHRDFYVDDGLKSVPSTKDTI-NLVSRTRQLCKKSGLHLHKFI-SNSREVMESVPEPDRAKGVSKTDLMGVDSPMEKALGV
>gi|68365152|ref|XP_695934.1|
RIVFNCSFQH--QGQSLNSQLLPGPTLGPSLLGVLLRFRQHAVAVSGDIKGMFHQVRLLPKDKQVLRFLW----RDMCRDREPDIYEWQVLPFGTTCSPCCAIFALQHHAQGHKGD-MPKLVNIVENSFYVDNCLYSTPTANEAK-DVVDGLRQLLAEGGFDLRQWA-CNVPSAIQHLPAEALSTNSERWLTKASTDLQEPTLGL
>gi|68697272|emb|CAJ14165.1|
RVVFDGSCKT-SNGRSLNDILKVGPTIQQDTTDILLRWRRRAIAVVGDVEKMYRQVWVHEEDRKFQRILW----RSHSSE-KIKTYELNTITYGTASAPFLAIRTLNQVLEDNKEK-YPLAASRI-NDFYVDDFISGADSENEAK-QLCEETKAALAMGGFPLRKWA-SNCPHILPSETEIDNIQRVIELKSREGAV---STLGL
>gi|27368143|gb|AAN87269.1|
RVVFDASAKT-TNNKSLNDIMWVGPRVQKDIFDIIIKWRKWEFVVSADIEKMYRQIKIDNNDQKYQYILW----RNSPKE-KIKTYKLTTVTYGTASAPYLATRVLVDIADKCKNQ---VISAIIRNDFYMDDLMTGADSVEEAN-KLITLIPHELQKVGFNLRKWI-SNNSKILTTVEDTGDNKVLNIIENECV-----KTLGL
>gi|17570531|ref|NP_508324.1|
RIVYDASARANKNSQSLNDALHTGEKLLPKLNGVLMRIRVPPILVSSDIEKAFLMLELHPQDRDCCRFLW-----QPPGQTQPVCYRFLRVPFGVKSSPFLLNASIKKHLRSEQSE----LAKKIALNIYVDNVFMGVANAKEGV-QFYRESKKIFAKVQMNLTQYE-SNSKELNEMIGIIEGKAADQKVNL--------KLLGT
>gi|4633116|gb|AAD26627.1|
RLVWNSSQRF--KGVSLNDLLLKGPDVLNQIRAVLLRFRSGVYAAIGDVRKMYNSVWLEDREVHLHRFLW----RNSAEE-EIQEYAVTRVNIGDKPAGCIAQLAMRETASLPQFSHLTAEREVLHRNAYVDDILTSHNDLKQLQ-ATTKGVEDILKAGGFALKPWVFSGQSGRGDHIDRQETVQKDAFVLPNQMSDDDNKALGL
>gi|58698875|ref|ZP_00373744.1|
RVVFDGSFQD-SSGQSLNDTLNVGPSIQRNLFDVCVRFRLHKYVFSADIIKMFRQIWINKHHRNYQRIVW----REHPSA-PLLHYQLCTVTYGTACAPFLAVRVLEQLARDYQHL-YPTAARILLEDFYVDDVLTGADTEEKLL-QYKQELIQLMSCAQLELGKWI-SNSNRVVDPETTITNNTSYSPLETTN------KVLGI
>gi|733532|gb|AAB03640.1|
RVVFDGSGKD-SSGVSLNDRLHIGPPIQRDLFGVCLRFRQHQYVLCADVEKMFRGIKVFKPHTNFQRIVW----RTTENE-PLLHFRLLTVTYGLAPSPFLAVRVLKQLADDHGHE-YPAAAHALLHDAYVDDIPTGANTFEELM-ILKDELIALLDKGKFKLRKWS-SNSWRLLKSLPEEDRCFEPIQLLNKSAADSPVKVLGI
>gi|21214752|emb|CAD32253.1|
RVVFNASSPS-ANGISLNDILHAGPVLQSDLTIQVLKWRYFQYVFSADITKMYRQIWVDPKHTPFQRILF----RNKEGD--IRDFELKTVTFGVNCAPFLAIRVLQQLAEDIQVP-FPNASRIIQQHMYVDDVLAGANSVNEAQ-SSIRELQAALSASGFPLRKWT-SNNKSVLKDVPAEHLLHSE---FLDIDAESTAKTLGI
>gi|17569839|ref|NP_508646.1|
RVVLDASSPI-GKDLSLNDCLHAGTNLLTPLYGILLRSRCYRYIIVADIEKAFHQVRLQVKHRSVTQFLWLADPSQPANADNVVRYRFTRIPFGVASSPFLLGAAIHHFLGRNPHR----LNNEIRDNLYVDNCMLGTDDFTKVM-PTAMAAKSIFRKMNMNLREFV-TNCDGIMQHIRAEDRAESRDI-----------KLLGC
>gi|72157018|ref|XP_794935.1|
RVVYDCAAAY--RGQSLNQNLLQGPDLTNSLLGVLTRFRQDHIAVMADIEAMFSQVRLRKEDKDLHRFLW---WPDGNIERPIKEYRMNVHVFGATSSPACANYALKQTAEQCEHE---EVAHIIQHNFYVDDCLYSSSTVEKAV-ELSKGLQATCGRGGFHLTKWN-SNHRAVLHAIPKDERASSVQQLNFEKDKLPQERALGI
>gi|2275629|gb|AAB63932.1|
RVVIDGSAHF-KNEPSLNDAIYQGPTILPD--SVDTRFRSGKTVLLADVEKAFLQVHLNESDRDVTRVLWVKNPDLPPTRENLRVLRFTRVLFGLNVSPFLLGATILFHLDRMEDK---KLANTIARNLYVDNLIIATDDDSEAMFKLYNKVKTVFNGLSMNIREFQ-SNDQSFTDLLDECDKTSESEV-----------KVLGV
>gi|7509786|pir||T26836
RVVYDASSHA-VGQLSLNDVVHAGANMVIPLFGILIRSRFIKLMIVGDLEKAFHQVQVQPEFRNLTLFLWLTDLNKPITRDNICTKRFVRLPFGMSCSPNLLASTIVHFLVHNPDE----LNNDILDNLYVDNILIGTNDLALIM-NRITRLKQIFSHMKMNIREFV-VNHDESMEKIDPKDRVSARTI-----------KLLGM

#RT_Rtv: RTs from retroviruses
>gi|4139739|pdb|1RTD|A
PVFAIKKKDSTKWRKLVDFRELNKRTQDFWEVQLGIPHPAGLKKKKSVTVLDVGDAYFSVPLDEDFRKYTAFTIPSINNETPGIRYQYNVLPQGWKGSPAIFQSSMTKILEPFRKQNPDIVIYQYMDDLYVGSDLEIGQHRTKIEELRQHLLRWGLTTPDKKHQKEPPFLWMGYELHPDKWTVQPIVLPE--KDSWTVNDICKLVGK
>gi|7107373|gb|AAF36395.1|
PIFVIKKK-SGAWRLLHDLRAVNKTMIPMGSLQPGLPAPVAIPAGFQKIVIDLKDCFFSIPLHPDDSKRFAFTVPVTNCVGPSPRFQWKVLPQGMTNSPTLCQKYVAQTIDPFRLQFPQLYIIHYMDDILIAGPCEQE-LLRITTLLITALKDRGLYISPDKVQLASPFFFLGFELHSSHIITQKAQIRT--NHLHTLNDFQKLLGD
>gi|26006405|gb|AAN77283.1|
PVFVIKKK-SGKWRLLHDLRAVNAIIKPMGALQCGLPNPNLIPQSYDMMIIDLKDCFFSIPLHPKDKHIFAFTVPALNNSQPTSRYQWKVLPQGMLNSPTMCQYFVSQVLQPYRDKYSSFLVYHYMDGILVATPGPKGTVLKTLPHLQRILQQGGLHIAPDKVQLSSPFHYLGHKVLESHANPCLPNIQL--PPAPTLLQLQQYLGS
>gi|294962|gb|AAA74707.1|
PVFVIRKKDKKKWRMLIDFRKLNEATQDFFEVQLGIPHPGGLKRQ-KLTIIDLKDAYYSVPLDKEFRPYTAFTVPSINNASPGERYQFTVLPQGWKGSPTIFQSTINQILQPFRKKYSDLTLIQYMDDLLIGTDRSEKAHQEIVQQIVTALLKVGFKVPKEKWQDQYPMQWLGYTLHPDKWQLQKIELPNI-DDEITVNQLQKLIGV
>gi|52001473|sp|P10266|PK10_HUMAN
PVFVIQKK-SGKWHTLTDLRAVNAVIQPMGPLQPGLPSPAMIPKDWPLIIIDLKDCFFTIPLAEQDCEKFAFTIPAINNKEPATRFQWKVLPQGMLNSPTICQTFVGRALQPVREKFSDCYIIHYIDDILCAAETKDK-LIDCYTFLQAEVANAGLAIASDKIQTSTPFHYLGMQIENRKIKPQKIEIRK--DTLKTLNDFQKLLGD
>gi|464433|sp|P33459|POL_CAEVC
PIFCIKKK-SGKWRMLIDFRELNKQTEDLTEAQLGLPHPGGLQKKKHVTILDIGDAYFTIPLYEPYREYTCFTLLSPNNLGPCKRYYWKVLPQGWKLSPSVYQFTMQEILEDWIQQHPEIQFGIYMDDIYIGSDLEIKKHREIVKDLANYIAQYGFTLPEEKRQKGYPAKWLGFELHPQTWKFQKHTLPELTKGTITLNKLQKLVGE
>gi|130635|sp|P11368|POL_IPMA
PIFVIKKK-SGKWRLLHDLRPINEQMNLFGPVQRGLPVLSALPRGWNLIIIDIKDCFFSIPLCPRDRPRFAFTIPSINSDEPDNRYQWKVLPQGMSNSPTMCQLYVQEALLPVREQFPSLILLLYMDDILLCHKELTM-LQKAYPFLLKTLSQWGLQIATEKVQISDTGQFLGSVVSPDKIVPQKVEIRR--DHLHTLNNFQKLLGD
>gi|130651|sp|P03354|POL_RSVP
PVFVIRKA-SGSYRLLHDLRAVNAKLVPFGAVQQGAPVLSALPRGWPLMVLDLKDCFFSIPLAEQDREAFAFTLPSVNNQAPARRFQWKVLPQGMTCSPTICQLVVGQVLEPLRLKHPSLCMLHYMDDLLLAASSHDG-LEAAGEEVISTLERAGFTISPDKVQREPGVQYLGYKLGSTYVAPVGL-VAE--PRIATLWDVQKLVGS
>gi|607779|gb|AAA62195.1|
PIFVIQKKDKSKFRMLHDLRAVNALIKDWGALQPGTPWPGAIPSEWPVIAMDISDCFFSIPLAERDSERFAFTIPSPNLREPAKRYQWTVLPQGMKNSPYICQQVVAEVIRPIRERFRDAVIIHYMDDILIAAAEERQ-TEVIFEAVKTTCHEKGLKINEAKTQRAPEVSYLGWRVMETGIAPLTVQLP---ETVTNLVQLQRLLGI
>gi|10504249|gb|AAG18012.1|
PVFVIKKK-SGKWRLLQDLRAVNATMHDMGALQPGLPSPVAVPKGWEIIIIDLQDCFFNIKLHPEDCKRFAFSVPSPNFKRPYQRFQWKVLPQGMKNSPTLCQKCVDKAILTVRDKYQDSYIVHYMDDILLAHPSRSI-VDEILTSMIQALNKHGLVVSTEKIQKYDNLKYLGTHIQGDVVSYQKLQIRT--DKLRTLNDFQKLLGN
>gi|51980735|gb|AAU20798.1|
PIFCIKKK-SGKWRMLIDFRTLNELTEKGAEVQLGLPHPAGLQERKQVTVLDIADAYFTIPLDPDYAPYTAFTLPKINNSGPGERFVWCGLPQGWVLSPLIYQSTLNNILKPFREQHPEIDLYQYMDDIYIGSDLGKKEHKQIVEELRKLLLWWGFETPEDKLQEQPPYKWMGYELYPRKWTIQTKELII--PEEPTLNELQKLVGI
>gi|21913258|gb|AAM81188.1|
PVFVIKKK-SGKYQLLHDLRAVNQQMQPMGALQPGLPVPTMIPKHWPLIVLDLKDCFFSIPLHEQDIQRFAFTVPSINHQGPDKRYEWKVLPQGMTNSPAICQLYVDQAVEPVRQQCPKVQILHYMDDLLITAESESH-LMEAYKLLLLYLEKVGLQVAPERIQKGEVVQYLGLKVTSEKVTPLEFEIAI--DGLQTLNDFQKLCGN
>gi|38093479|tpg|DAA01921.1|
PIFIIRKK-SGKWRLLQDLRKVNETMVLMGTLQPGLPSPVAIPKGYYKIVIDLKDCFFTIPLHPKDCERFAFSVPSVNFKEPMKRYHWTVLPQGMANSPTLCQRFVAKAIQPVRQQWPNIYIIHFTDDVLMAGKDPQD-LLLCYGDLQKALADKGLQIASEKIQTQDPYNYLGFRLTDQAVFPQKIVIRR--DNLRTLNDFQKLLGD
>gi|118126674|ref|XP_426835.2|
PIFVIKKK-SGQWCLLHDLRGMNSTLQDMGALQPGLPLPSMIPDAWSCLVVDLKDCFFSIPLHPDDCQHFAMTVPAVNNAAPSQRYHWVVLPQVMKNSPTICQMYVALALKEFRGCYLKLLIYHYMDDILVAGRELPK---DIERQLWHHLEEWGLRVGEDKTQQGHPIQYLGVIVEKHQIRAQKMVVTE--QRIQTLNDLQILIGA

#RT_ZFREV_like: RTs in sequences similar to the intact endogenous retrovirus ZFERV from zebrafish and to Moloney murine leukemia virus RT
>gi|7546282|pdb|1QAJ|A
PLLPVKKPGTND----YRPVQDLREVNKRVEDIHPTV-PNPYNLLSGLPPSHQ-WYTVLDLKDAFFCLRLHPTSQPLFAFEWRDPEMGISGQLTWTRLPQGFKNSPTLFDEALHRDLADFRIQHPDLILLQYVDDLLLAATSELDCQQGTRALLQTLGNLGYRASAKKAQIC-QKQVKYLGYLLKEGQR
>gi|76633826|ref|XP_874426.1|
PILPVKKEGGQD----YRPVQDLRLVSQATVTLHLSV-PKPYTLLSLLPPKTR-IYTCLDLTEAFSRICLAPASQPIFAFEWDDPIGGNKQQLTWTHLSQGFKNTPNIFGEALASDLEPFQPERYGCCLLQYVDDGLLAAETWVECCEGTPVLLHLRAEAGSRVSRKKAQIC-KEEIRYLGFVLRGGTR
>gi|325465|gb|AAA73090.1|
PLLPVPKPGTKD----YRPVQDLRLVNQATVTLHPTV-PNLYTLLGLLPAEDS-WFTCLDLKDAFFSIRLAPERQKLFAFQWEDPESGVTTQYTWTQLPQRFKNSPTIFGEALARDLQKFPTRDLGCVLLQYVDDLLLGHPTAVGCAKGTDALLRHLEDCGYKVSKKKSSDL-PTAGMLLGIYYPTGGA
>gi|76676203|ref|XP_607546.2|
PILLVKRSGGND----YRAIQDLRTIN--CSDHHPSSGPKFLHSLESLTHSGK-L-VHLPRSHGLILLPPAVTSQPLFAFEWEDPHTGRKTQLTWTQLPQGFKNSPILFGEALAANLAAFPSETFNCTLLLYVDNLLLASSTQGDCWRGTKALLALLSTTGYKVSWKKAQIC-RQEVKYLGFVITKRHW
>gi|86651882|gb|ABD14436.1|
PLLPVKKPGTND----YRPVQDLREVNKRVEDIHPTV-PNPYNLLSGLPPSHR-WYTVLDLKDAFFCLRLHPTSQPLFAFEWRDPGMGISGQLTWTRLPQGFKNSPTLFDEALHRDLADFRIQHPDLILLQYVDDLLLAATSELDCQQGTRALLQTLGDLGYRASAKKAQIC-QKQVKYLGYLLREGQR
>gi|47210214|emb|CAF93313.1|
PVLPVLKADGQS----YRMAHDLRSINVRVLEPPQAV-PNPAAALSLVIPEHQ-WFTVIDLANAFFCLPLSEELQPIFAFTYSG------QQYTYNRMPQGFSLTPGIFNSILKQCLQESPPLPDKTLLVQYVDDLLIASHTREQCLEASLALLQYLGKIGFLVKKTKIQLV-RPRVQFLGSVISGRGS
>gi|21070179|gb|AAM34208.1|
PILPVLKKTTGK----YRMVHDLRLINEKVLTATLPT-PNPYTIMSKLTPKHS-HFTCIDLANAFFCMPLAEQCQGIFAFSYQG------AQYTYNRLPQGFILSPGLFNQAL-RELLDSCTLHEGTIVIQYVDDLLLAAHSNEVCLQDTRKVLTLLSTAGLKVSKEKIQIS-RATVHFLGRIIGQTGT
>gi|68363092|ref|XP_693232.1|
PIFPVKKIRDNGMPTEWRFVQDLQAVNAAVKQRAPLV-PNPYTILSQIPEKSQ-FYSVVDLANAFFSVPVDKDSQFWFAFNFNG------KGYTFTRLCQGFTASPTLYNEALLRSLEPLT-LTAGTALLQYVDDLLICAENEETCVKDTVTVLRHLAKEGHKDMQTFATGLEKNKWRQSGCVMKDNVK
>gi|45382873|ref|NP_989963.1|
PVWPVRKPNGK-----WRLTIDYRRLNANTGPLTAAV-PNISELIAAIQEQAHPFMATIDVKDMFFMVPLHPDDQLRFAFTWEG------QQYTFTRLPQGFKHSPTLAHYALAKELEQIP-LEEGVRLYQYIDDILIGGDHLTPVKIMHDKIIKRLEELGLTIPPDKIQSP-AAEVKFLGIWWKGGMA
>gi|7522108|pir||T29097
PIWPVQKTDGS-----WRMTVDYRKLNQVVTPIAAAV-PDVVSLLEQINTSPGTWYAAIDLANAFFSVPVHKDHQKQIAFSWQG------QQYTFTVLPQVYINSPALCHNLVRRDLDRLD-LPQSITLVHYIDDIMLVGPSEQEVATTLDSLVTHMRIRGWEINPTKIQGP-STSVKFLGVQWCGACR
>gi|118088659|ref|XP_001234064.1|
PIWPVRKPDGT-----WRMTVDYRELNKVTPPIHAAV-PNIASLMDTLSREIETYHCVLDLANAFFSIPIAKESQDQFAFTWEG------RQWTFQVLPQGYVHSPTFCHNLVASDLANWN-KPSTVKMFHYIDDLMLTSDSIEALEKTVPSLITYLQEKGWAINPQKVQGP-GLSVKFLGVVWSGKTK

#RT_Bac_retron_I: RTs in bacterial retrotransposons or retrons
>gi|39982422|gb|AAR33883.1|
LLNADVSKCYHTIYTHSLPWALHTKPVAKNN--------QKWPPAGGK-PPLVGNGLDLWSR---NLQDAQTI-------------------GL---P-VGPDTSFVLAEALLSAVDQLVASKIAGAR-------------GFRFVDDYEFVCDTLE-QAEQVLSVLQWAL-AEFELSLNPKKTTIKELP-------------------TALDTTWVNA
>gi|14251228|gb|AAB53491.2|
KLHLDLSNFYHTLYTHSIPWMIDGKSASKQN--------R---------KKGFSNTLDTLIT---ACQYDETH-------------------GI---P-TGNLLSRIITELYMCHFDKQMEYKKFVYS---------------RYVDDFIFPFTFEN-EKQEFLNEFNLIC-RENNLIINDNKTKVDNFPFVDKSSKSDIFSFFENITSTNSNDKWIKE
>gi|17227201|ref|NP_478367.1|
ILNVDLSNFYHSLYTHSIPWVIMGKKNAKKE--------R---------NKGFSNQLDKLIT---SCQYNQTH-------------------GI---P-TGNILSRIISELYMCYIDSEMENKGYRYA---------------RYVDDISFSFNFEE-EKDKFYRDFNKLC-MKYELKINDKKTEVNDFPYIHPQNKDFIFNYFKNYSSNSKGETWIIG
>gi|115525547|ref|YP_782458.1|
ILQTDILSFYHSVYSHAIPWAIHGKAFAKSN--------RTD-------PSLLGNRLDALVR---SCQDGQTI-------------------GL---P-VGPDTSRIISEVLLCAVEARIPSKVGSRI-----------TGGYRYIDDFFLCFDSLA-EAEVGLAALRESC-LHFDLRLNPTKTHTIHAL-------------------DFNEETWATE
>gi|52208638|emb|CAH34574.1|
MVQFDVSKCFDSIYTHSLPWAVLGKDQTKFS--------LKQS------KATFGGQFDALMQ---NLNQKETN-------------------GI---V-TGPEFSRIFAEIILQSVDVELMTRLAQESN--LTH--KIDYEIFRYVDDFFVFYNAEF-AQLKIFETLQEVL-KSKKLSVNTSKIKRYQKPIITE---------------ITIAKEWISS
>gi|50119997|ref|YP_049164.1|
MWSLDIANCFDSIYTHTISWAIKNKEFIKAN--------LKK-------GKQFGDELDSIMQ---RSNNNETN-------------------GI---P-IGAEFSRVFAELIFQNIDDCIVKKLEEVYQ--YKL--KTHFEILRYVDDYFIFAINES-VAGRVHGIISDEL-GKYNLYLGDKKLSKLERPFLTN---------------KSEMVIEAKK
>gi|89094970|ref|ZP_01167900.1|
VLTTDISRFYHSIYTHSIPWALHTKPVAKAS--------RA--------LTLLGNKLDFLVR---QGQDGQTV-------------------GI---P-IGPDTSLVLAELIMHQCDHALITKLPLIK-------------GHRFIDDYELSFSTRT-EAEEAFHFLETCL-SDYELALNPKKTKVSELP-------------------LPLESDWSRE
>gi|89098464|ref|ZP_01171347.1|
ILKTDISRYFPTIYTHSIPWALHTKEVAKQT--------RG--------DSLLGNTIDEYVR---NIQDGQTM-------------------GL---P-VGPDTSLIISEVIGTAIDIKLQEAHPNII-------------GSRYTDDFEFYFKTQS-EAEKVLNTIQEIV-RHFELDINPVKTEIISSP-------------------NLLEPIWLSN
>gi|118579436|ref|YP_900686.1|
VVKLDIKGFYSNIDREMLRIKLVDGPTDEIR--------VAF-------KSLGETEIDKIKVLA-SWFISICD------------ATVEGKKGV---P-QGPAFARYLAELYLMDFDRFIERMVSGSL-----------GRYFRYVDDVFVFVDTEA-EAASILAYATNFL-KSLGLHLSHGKCFVGTIAQYKPEISR-----------YFSRAKYVVD
>gi|110679729|ref|YP_682736.1|
LRMLDVSKCFFNIYTHSISWSLKDKDFSKKN--------AK--------NYSFEQQFDTLMQ---HSNYNETA-------------------GI---L-VGPEVSRIFAEIILQRVDVELERAVSKRLK--LEC--GRDYDIRRYVDDFHLFANDED-VLDKVEGVLAEIL-ETYKLFLNTGKSEEVERPF------------------VTGISRLKFE
>gi|84716995|ref|ZP_01023338.1|
LLATDLINYFENITTEKIKEAFESKLPNIHA--------SGKE------KLKIRNAITTLCDLLVKWSYSEKH-------------------GL---P-QNRDSSSFIANMVLNDIDHEMKRRGYDYY---------------RYVDDIKIICDSPR-HARKILSELIKEL-RKVGMNINSSKTKVLTAEEKPD---------------VLAEFFPNTD
>gi|71554783|gb|AAZ33994.1|
LLVTDLLNYFENISIASIKNAFENLLQKVDA--------TGPE------KSLIRNAIQTLCELLARWSYNDLH-------------------GL---P-QNRDASSFVANIVLNSVDQTMVNLGHDYY---------------RYVDDIRIICASPR-AAKKVLTELISQL-RTVGMNINSGKTIILTSSNSEA---------------EIAEHFPTSD
>gi|116749530|ref|YP_846217.1|
LVSCDIANFYDRLNLHRLESILISLALDKNQ----------------------VRLLNELLL---FWANRDSY-------------------GL---P-VGSNASRILAEASLLEVDNFLLSIGVSFC---------------RFVDDYRIFAPDAH-TAHHWLTQLIERL-WLEGLTINKSKTKIEDVS------------------------DWKKE
>gi|78368541|ref|ZP_00838765.1|
IVNADIASCFDSIYSHSIPWAIKGYEFAKNN--------RG--------ENEWFNQFDKFLR---TTKRCETN-------------------GM---P-IGPATSSICLEIILARVDSRLHDLGFEHE---------------RYVDDFCCYCSTKE-QADEFIIKLSELL-AEYRLSLNLRKTTIIELP-------------------IASTDDWIVE
>gi|85708303|ref|ZP_01039369.1|
LLITDLSNFFENVSREQIIKALEQAVPNLLA--------TGPQ------KLHVRNAIATLDRLLGQWTYSGDH-------------------GL---P-QNRDASAFLSNILLSNVDRKMAEKGYDYY---------------RYVDDIRIITDSET-HARRGLQDLIREL-RTVGLNINAKKTEILAPDVSDE---------------KVAKYFPSQN
>gi|78063598|ref|YP_373506.1|
VIKLDLSAFYDNINIEGLVEKLTELYWRYSE--------TIAPTAKTSSARFWATLAKSLSI---GWQVEDAK-------WAPYLKGQKLPSGL---P-QGLVSSGFFANAYLVDFDEAVGESIGRSFNRRGVK--FRLHDYCRYVDDVRLVVSCDK-QVPS-EEELGLALTEWVQARLDSKANDVEFEE-------------------RLVVNEQKTE
>gi|84716887|ref|ZP_01023280.1|
VVKADVASCYPSIYTHSIPWALHDKITTKKN--------QKI-------TELAGNLLDKCTQ---NTRDGQTN-------------------GL---L-IGPHASSIISEIILTKIDTDLQKKYKKIV---------------RHIDDYTFFADTFD-EAEKFVKDLGLCL-RSYEMSLNYKKTSILPLP-------------------TPSVEDWIHR
>gi|84714397|ref|ZP_01021862.1|
AVVADIKRFYPSVKIENITKSLKCLFQNLPN--------E------------FSDGFTNFFV---QLLNASNG-------------------GI---P-IGPAPGHLLGHVALSQVDSDLTKKYGSNY--------------FRYVDDIVIVCPSAD-RAV-VLSDIENCV-KRSNFELNLSKTE------------------------YLTKEEWHAS
>gi|113936248|ref|ZP_01422143.1|
YVSADIRAFFHSIYTHAIPWAIYGKAWSKTH--------RD--------PYHYGNAIDLLCR---NGQDGQTI-------------------GL---P-VGPDTSRLIAEVIVSAIDTELRTRLNIGG-----------RDASRYIDDYTISGVNGE-SGEEILAALRQSA-ALFELELNNDKSAIYPTS-------------------HRQNTGWKQA
>gi|113866906|ref|YP_725395.1|
LVKLDLSAFYDNIDVGRLIESLRRHYAKFCE---------TFPDYPKHDEDFLAVAREALTL---RWDPQDST-------YAPLLRDRALPRGL---A-QGLAASGFFANAYLIDFDKEIGRQLNTAIHFEGDE--FTLVDYCRYVDDLRIVVSVDARLPHTHIPGVITQW-VQRILDVTVNEHVEDDRN-------------------VLKLNARKTE
>gi|90580000|ref|ZP_01235808.1|
IVSLDLTNFYGCIKKDLLIRKLKEIASEHHD--------IEYG------ETDEFWELIKNIL---DWEWSEES----LSLLKKLNITTSDITGL---P-QGLASAGALANAYLVKFDEKLGTKLNTKIN--DST--IMLHDYCRYVDDIRLVISGESLSSKDIKRSVRFFIQGILNETLEQKWDGVSSKPEQ-----------------YLEVNDDKTN
>gi|53718205|ref|YP_107191.1|
VVSLDIKSFFDCVDSKALVHELYRLQTTYQK--------HEGLSENDS-TDVPFWELASLIL---SWRWRESD--HQSAPLIRGQDFEHLAVGL---P-QGLVASGFFANAYLVGFDTEMWRVCEEQQQL-PED--IRILDYCRYVDDLRIVVEAPLAMGAAGSERTLQRV-QQFVSEMLANHCLRLQANV------------------SLTLSLQKSS
>gi|114567587|ref|YP_754741.1|
VVVTDIANYFDNISFSQLRNVLSGYGQI---------------------DEGLLDFLFFMLE---SWIWRPDY------------LPLSGL-GL---PQVNFDAPRLLAHSFLFEIDKYLTEKTNNNF--------------VRWMDDIDFGTNSIE-DAKEILRGLDEML-LTRGLRLNIGKTKILSSTEARKF--------------FLPDENRYLN
>gi|16331604|ref|NP_442332.1|
VLYCDIADFYNQIYHHTVENQLFASGFPNQA--------KKW--------------IISLIE---STTAKVSR-------------------GI---P-VGPHALHLIAESTMIPIDNCLVSKGINFI---------------RFADDIIVFCKSRN-HAKQLAYSIASTLDKQQRLTLQRHKTQTYNSE-------------------------EFKK
>gi|32473346|ref|NP_866340.1|
VITADLSQFYDRVRPSLLHSKLRNLLGDVAD------------------SKLLDALSTFFNW---SWHADDKAEAIKYATNSSPEIAGYDQIAL---P-QGLVSSGFFANLVLIDFDRDMVSKYRETRV--DDC--FQYVDYCRYVDDMRFVVRLDSRFAAKSSAAQEQILKESFSDMLKTSLAQHAPG--------------------LLAKESKLSV
>gi|89890656|ref|ZP_01202165.1|
IIVTDLSNYYDSIYIPELRKVISGFIDKKES---------------------VLDILFKIIERI-SWLPDYLP---------------YTGRGL---PTTNLEGVRLLAHSFVFEIDEVLKSKSNESF--------------TRWMDDIIIGVNSRT-EAVNVLSSTSDML-KSRGLALNLKKTNIYSSKEAEFHFQIEENQYLDSIDFDYHIEHGIRK
>gi|84716183|ref|ZP_01022930.1|
VLRLDAKRYYDSIQRYLVRDALLTPLKSALTTHGVPEGFRAIFGFHDADAPNWDAALERLVSGL-VFEYEYRD-----PGAVGAPRQSDAVMGI---A-QGPVLSAYLGTIALFPVDEVARRFMRDTAERLPDGQWRQRAGYARYVDDIVLFADSQE-LLKKLREVLQAKS-SELSIDLIHKGDRVRAGSPDQVMRQLNEGRGL-----AASVPAWETP
>gi|69935276|ref|ZP_00630256.1|
AASLDLSKFYPSVQVSAIQRGFDTLVEGFSD--------EPRL------SALLSAMLRFEVD---DGGLDQAL-----KAKVDPIAPVGSFDGI---P-TGLFVGGFLANVAMLPIDREVEKLLLQHR----------NIAHFRFVDDHEFLAYDFD-RLLEWMTEYAHLL-ARHGIGVEIEREKYSPAELKWLLHPD-----------ETVEPKKLSE
>gi|60682764|ref|YP_212908.1|
ILSLDIQRYFYSVRIDLDSIKNRCSHSNKQI--------EKCFHLLQIINKTYTSKINKLLDIP-LTNDELNA-------------------GYTILP-IGLLSSGLLGNLYLEDFDKTIKEELNPAY-------------YGRYVDDILFVFSDRK-VKLEVNNPIHDFI-DRYFIKKNILETIL-----------------------DENNITYLLP
>gi|54293035|ref|YP_125450.1|
AASLDLENFFHNIDPSFLSSEAFVKELIGDL--------SED-------EAEFNVQMSQFLK---RWSDKASS----------LFDKKPFKGGL---V-VGLTATRVISNIILYKFDKLVKEKITPIH-------------YGRYVDDLFLVILDPG-NVRNIVEFMDYLK-NRLGEDYLSNGNEKWSIKLGKDYQKKS----------IFQFQTEKQR
>gi|118745511|ref|ZP_01593484.1|
VVYLDLQKFYPSVSTELASATWKGAAASVQL------------------GQYWVTLGDKLLADY-STILGGRG-------------------GL---L-SGPVFGHVVGNIVLRGLDDTLHSHYPGRC--------------FRYVDDIALVIPFAD---MKSAKTLLKEA-LPEGLHINEAKTLEMEAK------------------------EWISI
>gi|119357506|ref|YP_912150.1|
WCSLDLEKFYPSLKLDIILRNITEFLPAELR--------VDA-------DNLIESMMLFEVDTA-NWSTDDLE----ALNEIGLSAKERDFKGI---P-TGLYVAGFLANAGLFKVDLEVDKLLKNRN-----------VAHFRFVDDHIVLAYSFN-ELVKWVEEYLKLL-DSLETGATVNRDKIEPEALAQYFGA------------KENPEKSLDD

#RT_Bac_retron_II: RTs in bacterial retrotransposons or retrons.
>gi|42775|emb|CAA44468.1|
RLVLAPDYLLKTVQRNILKNVLSQFP---LSP-FATAYRPG----CPIVSNAQPHCQ--Q-PQILKLDIENFFDSISWLQVWRVF--RQAQ---LPRNVVTMLTWIC-------------------------------CYNDALPQ-------GAPTSPAISNLVMRRFD----ERIGEWCQARG--ITYTRYCDDMTFS---------GHFNAR----------QVKNKV------------CGLLAELG---LSLNKRKGCL---IAA-CKRQQVTGIVV
>gi|8100799|gb|AAF72414.1|
RQIFEPKRSLKGIQKKINKEIFEKID---YPH-YLHGALSG----RDYISNAAVHTR--K-RTVICLDITNFYPSISKKDVCSIF-KNLMR---FSPDVSLCLTELV-------------------------------TLNNKVPQ-------GGCCSSYIANLLFFNSE----YNLYNRLKSMG--LSYSRLLDDITIS--------SDKDLSSE-EKT-----KVIKLV------------HGMVNQYR---LSINESKTTIEHSKDS-SSKLSVTGLWV
>gi|28854330|gb|AAO57394.1|
RNVYEPKYELKKLQKRINSRLFEKVH---YPF-YLQGGVRDEDHPRDYIENSRIHAG--S-KSLISLDIRNFYDNIPYESVVSIF-KYFFN---FPDEVSDLLSKIV-------------------------------TRDGKVPQ-------GACTSSYVANLIFHNSE----YNFVSRLRNQG--VTYSRLLDDVTLS--------SSRLLSQD-EVS-----GYIKYV------------AGLFSEHK---LRIKKSKTKIERSDDL-SAEYTVTGVWV
>gi|13702009|dbj|BAB43301.1|
RELMIPNMALKNIQRWILDNVLYRRQ---VHK-CATGFVPR----KSIVNNAIPHVG--Q-KYILKMDIENFFPSITFKQVRKIF--SEMG---YKFELATALANLC-------------------------------TVNNQLPQ-------GAPTSPYIANIIFYNID----KRIFSYCQKNN--LRYTRYADDITIS---------GSNKVS----------FSKEII------------REIVNQYN---FRINESKTIM---FKP-GDRKKVTGIIV
>gi|134069|sp|P23072|RT16_MYXXA
RTITSPKPELKAAQRWVLSNVVERLP---VHG-AAHGFVAG----RSILTNALAHQG--A-DVVVKVDLKDFFPSVTWRRVKGLL--RKGG---LREGTSTLLSLLSTEAPREA-----------VQFRGKLLHVA--KGPRALPQ-------GAPTSPGITNALCLKLD----KRLSALAKRLG--FTYTRYADDLTFS-------WTKAKQPKPRRTQRPPVAVLLSRV------------QEVVEAEG---FRVHPDKTRV---ARK-GTRQRVTGLVV
>gi|39546377|ref|NP_462745.2|
RTIAHPSKELKFIQREITEYLTDKLP---VHE-CAFAYKKG----SSIKTNAQVHLH--T-KYLLKMDFENFFPSITPRLFFSKLRLANID---LTADDKVLLENIL-------------------------FFKSKRNSNLRLSI-------GAPSSPLISNFVMYFWD----IEVQEICSKIG--VNYTRYADDLTFS-------TNNKDVLF----------DIPDML------------ENVLPKYSLGRIRINHEKTVF---SSK-GHNRHVTGITL
>gi|36788123|emb|CAE17248.1|
RIVYAPNRMLKSILRKINNRIFNQIN---FPD-YLYGSIPDKENPRDYILCAHQHCK--A-KILIKLDIENFFPTMKTKFVFNIF-KDLFK---FSDEVSNILTKLT-------------------------------TYDGFVPQ-------GAPTSTYLANLYFYDCE----PNKVNYLRSLG--FRYTRLIDDITVS------RLKKEGDWK----------FVETII------------SEFITQKE---LSVNKDKTQL-LSANS-PQSFKVHGLCI
>gi|9656957|gb|AAF95528.1|
RTIAHPSSKLKICQRHLNAILNPLLK---VHD-SSYAYVKG----RSIKDNALVHSH--S-AYVLKMDFQNFFNSITPTILRQCLIQNDIL---LSVNELEKLEQLI-----------------------FWNPSKKRNGKLILSV-------GSPISPLISNAIMYPFD----KIINDICTKHG--INYTRYADDITFS-------TNIKNTLN----------KLPEIV------------EQLIIQTYAGRIIINKRKTVF---SSK-KHNRHVTGITL
>gi|21233055|ref|NP_638972.1|
REIHAPKKALKYLQNKVAHALAGVVP---VRQ-IAKGYVPG----RSIYDHAKMHRS--K-KWVVLVDLKSFFPSINFGRVLGLLRAPPFS---LENEVAVAVAQLC-------------------------------TRAGELPQ-------GAPSSPVISNLICRKLD----RQLLELAKQAG--CGVSRYADDICFS-------TNRKRVSV----------EICDFVNEH-GWVPGAGLKQLICSNG---FEINFSKFRV---HEG-RDRKLVTGLVV
>gi|19703506|ref|NP_603068.1|
RKISEPLPSLKEIQKWILENILNKIQKEKVSK-YAKAYQKK----ISIKENVKFHRG--Q-KKVLSLDITNFFLNIKIDKIYEVF--YNLG---YSKSLSTLFSNLC-------------------------------TLNYSLPQ-------GAPTSPILSNIVMLNFD----NEIEKIVLEKR--IRYTRYADDMTFS---------GDFLEK----------EIIKYV------------KENLNKIG---LKINNKKTRV---RKN-WQQQMVTGIIV
>gi|134078|sp|P23070|RT86_ECOLI
RTIYQPSRELKALQGWVLRNILDKLS---SSP-FSIGFEKH----QSILNNATPHIG--A-NFILNIDLEDFFPSLTANKVFGVF--HSLG---YNRLISSVLTKIC-------------------------------CYKNLLPQ-------GAPSSPKLANLICSKLD----YRIQGYAGSRG--LIYTRYADDLTLS-------AQSMKKVV----------KARDFL------------FSIIPSEG---LVINSKKTCI---SGP-RSQRKVTGLVI
>gi|20090946|ref|NP_617021.1|
REINAPSKKMKYIQRWILDNILYKLN---SGD-YAHGFIPG----KTIFTNAKVHVN--Q-DLVLGVDIKDFFPSINFRSVYYVF--KSAG---YTKKIAWTLADLC-------------------------------TYHWKLPQ-------GAPTSPMLANLVALKLD----KKIAKYCARRN--FRYSRYADDVTIS---------GSYKLP----------MHKEKI------------IGIIEDDG---FVVNHEKTRM---FSK-GSRQKVTGLVV
>gi|39996465|ref|NP_952416.1|
RQIVVPEPELMHLQRWINEFILKRAK---VHS-CAAAYISG----SDIKMNASKHLG--A-NWLIKLDIQRFFESISELQVYYIF--HRLG---YPKLLSFEMARICTRVDTQSNRHFR--PRWNNRIHHFEILEYCDSRVGYLPQ-------GAPTSPSLSNLTCRKLD----KEIYDLSCRSD--CRYTRYADDFAFS-----FIDLDREKAS----------NFVNQV------------SRIISSYG---FRKNARKTKI---IPP-GSKKIITGLVL
>gi|23130511|ref|ZP_00112324.1|
RIISAPKPELKAAQRWILENILEKLE---VHN-AAHGFCKN----RSIVTNAKPHVG--A-NVIVNIDLQNFFQSISYKRIKELF--SGFG---YSESTATIFGLICTTAE--------------IAINGQINHTA--SENRHLPQ-------GSPASPAISNLVCRNLD----IRLAAIAENLG--FCYTRYADDLTFS-----TSEDASSKIS----------NLIKNT------------KFIIHGEN---FTVNDNKTKI---SSK-SVQQEVTGVIV
>gi|28211545|ref|NP_782489.1|
RNIAAPKSLLKNAQRKILEEILSKLP---VSE-YAHGFLKE----KSVVSGAKAHKN--KPELLINIDLEDFFPTITFERVRGMF--KGFG---YSGYVASLLSMICTYCERME-----------VEVRGEIKYVK--TSHRILPQ-------GSPASPMITNIICRKLD----KRLSGLASKYS--FTYTRYADDMSFS----FINENTDLTYG----------RLIGLI------------SKIVKEEG---FNINKNKTKF---LRQ-NNRQCITGIVI
>gi|134074|sp|P23071|RT65_MYXXA
RLLHAPKRRLKALQRRMLALLVSKLP---VSP-QAHGFVPG----RSIKTGAAPHVG--R-RVVLKLDLKDFFPSVTFARVRGLL--IALG---YGYPVAATLAVLM--------------------TESERQPVELEGILFHVPVGPRVCVQGAPTSPALCNAVLLRLD----RRLAGLARRYG--YTYTRYADDLTFS-------GDDVTALE----------RVRALA------------ARYVQEEG---FEVNREKTRV---QRR-GGAQRVTGVTV
>gi|17230453|ref|NP_487001.1|
RLVEKPKYELKLIQKRI-EGLLKRIE---IPK-YIHAPTKG----RSYVSNAKAHLN--S-YVISSLDIVKYFPSTKSKRVYWFF-HTRMK---CSPDVAAILTKLS-------------------------------TYKEHLPT-------GSPLSPILSYFAHIDMW----EEINNIVEDAG--CILTVYMDDVTIS---------GDYVSR----------NLIWQI------------KKKFHRYG---LSSNTKKEKY---YIG-KNSRKITGVIL
>gi|33240062|ref|NP_875004.1|
RLISSPKPALRNAQKWILESILNKLD---IHS-AATAFRPG----KSILDNAKLHAN--S-KVVLRLDLKDFFPSITFIRIRGLF--ESLG---YNPGISTVFSLLCTDSPRII-----------LKYHGETHFVK--VGPRNLPQ-------GACTSPALANLIAHKLD----RRLQKYTEKIG--WIYSRYADDLVFS-------SNAEEMPA--Y-------RLVKAA------------SKIVASEG---FRINKHKTNI---MRH-PHRQTVTGLVV
>gi|437206|gb|AAA03713.1|
RVIAQPAKGLKDIQRAFVQ--LYNFP---VHD-ASMAYMKG----KGIRDNAAAHAG--N-QYLLKADLEDFFNSITPAIFWRCIEMSSALTPQFEPQDKFFIEKIL-----------------------FWQPIKHRKTKLILSV-------GAPSSPVISNFCMYEFD----NRIHAACNKLE--ITYTRYADDLTFS-------CNIPNVLK----------AVPSTI------------EALLKDLFGSELRLNHSKTVF---SSK-AHNRHVTGVTI
>gi|42501|emb|CAA78293.1|
RIIAQPTPRVKAIQRDIIEILKQHTH---IHD-AATAYVDG----KNILDNAKIHQS--S-VYLLKLDLVNFFNKITPELLFKALARQKVD---ISDTNKNLLKQFC-----------------------FWNRTKRKNGALVLSV-------GAPSSPFISNIVMSSFD----EEISSFCKENK--ISYSRYADDLTFS-------TNERDVLG----------LAHQKV------------KTTLIRFFGTRIIINNNKIVY---SSK-AHNRHVTGVTL
>gi|15595912|ref|NP_249406.1|
RLVYKTDKDLRAYHRFLNKFLFERLP---VVDDVVFSYRKG----VNAVDAVEKHAG--S-KFYFQTDLRDFFSSLTKSDVRRTL--EWAKDVCVISDLDVWVERIL----------------------------KLVTIGDSLPM-------GFSTSPAISNACLYSLD----GILKTHCLSNG--VIYTRYADDLIFS-------SSNKQALD----------PLFGVV------------CRTLQSEFSGRMGINSQKTKY---LRK-GGKIKLLGLNV
>gi|46915659|emb|CAG22431.1|
RKIQCPCNGLEKIHSRI-ASLLCRIK---TPD-YLQSGKKG----HSNVSNANVHLG--S-SCLLATDIKSFFPSTKRYMLFSFF-FHSME---CSADVADILSDLC-------------------------------TINGHIPT-------GSQISMPLAFWANSHMF----DELYLLSVKHA--VKMTVYVDDLTFS---------GDAVNK----------LFMSVT------------QRIITKHN---QVMHPDKTKL---YRG-YESKLITGVVV
>gi|83646667|ref|YP_435102.1|
REISAPMPRMKRAQYWVLDNILAPLT---LHE-AAHGFVVE----RSIVSNAQPHVG--K-DVVINLDLKDFFPTVSYARIKGAF--RHLG---YSEQIATILGLLCSQPKTQE-----------VEMDGQKWFVS--EGERFLPQ-------GAPTSPAISNVICRKLD----RRLQSMAAKLG--FTYTRYADDVTFS-----ADGKSDDDVK----------RLLWRC------------RSIIKDEG---FVVHPDKTRI---MRK-HRRQEVTGVVV
>gi|77971993|ref|ZP_00827584.1|
RVIAQPTPEVKDLQRKLVEFLRTQLT---VHS-SATAYEPG----KGIRENAQQHVN--N-PYLLKMDFSNFFNSITPETFKNALLHDSVE---IDEHTLILLISIF-----------------------FWCPGKKLSGKLVLSV-------GAPSSPFISNYVMKKFD----QLLSEICHQAG--VTYTRYADDMTFS-------TQHENVLF----------TLKEQI------------PTLIVQSGYENISINESKTVF---SSK-AHNRHVTGVTL
>gi|75703186|gb|ABA22862.1|
RTIHSPNNSLEILQRKLSQILYSVYS---PKP-CVHGFAAN----RSIVTNAKVHTK--K-KFVLNIDIKDFFDVINFGRVRGLFIAKPYQ---LNEEVATILAQIC-------------------------------CFQNKLPQ-------GAPTSPIISNLVCARMD----KELQKFAKENG--IFYTRYADDITFS-------INREDLPVGLVSSYSK--GFSKVI-------LGDDLRSIIENNG---FKINEAKVRL---AYR-TQRQEVTGLVV
>gi|83649357|ref|YP_437792.1|
RLLEAPKVWLKGIQRRIYQEILAPLP---LHE-AVHGFRAQ----RSSLTHARVHVG--Q-ALLLKFDLKDFFPSVGYPQVYRVL--RRLG---YGHEVTRLLSRLCTQVTPNEILR--------SPAARHLERGEELFRRAHLPQ-------GAPTSPALANLVAAHLD----RRLSALADSMG--RRYSRYADDFVLS-----GALMSPGAIE----------RLQALV------------GAIALEEG---FVLNTRKSAV---IGQ-GARQQVGGVVV
>gi|72117123|gb|AAZ59386.1|
RVIDSPYPSLEIIQRSILRNVLSNFP---AHP-NAYAFIKG----RNAITHASHHLA--C-RELITLDIKDFFPSITRQMVIDAL--IENG---LANGVANYISLLC-------------------------------CLNGTLPQ-------GACTSPALSNLVFERID----ERLSRLAKTLK--LKYSRYADDLAFS---------GDAIPR----------DMPQLI------------ERILESRD---LKLNKEKIRL---KIA-GAKKIITGVSI
>gi|53753790|emb|CAH15250.1|
REINAPNRILKEIQYKLLNELQSYYS---KRN-CTHGFINE----RNVVTNARPHVK--K-NIILNLDLKEFFQSIHFGRVRNLFMSNPFN---FNKNVATVLAQIC-------------------------------CHKGHLPQ-------GAPTSPLITNLICYKLD----KELSKLAFNNN--CTVTRYVDDITFS-----FNCSHDKIPR----------DILDGISGE-SISISKKLVNIINKNG---FEINYKKVRL---SSS-NQRQQVTGIVT
>gi|56680464|gb|AAV97130.1|
REIVAPKVGLKVIQKWFSVQLQDCAR---IDD-HVFGFVPG----RSHIDAASVHTN--A-NWVYSIDLTNFFPSTPINWVASSL--INIG---YDADSADRISKLC-------------------------------CYRGALAQ-------GSPASPVLSNISMRGID----AALGALAAEMD--VRVTRYADDITFS--------AAGEFPQ----------VLPERL------------ESLFSQTP---WKISQEKTYF---SEA-PVRLKVHGLVV
>gi|85712389|ref|ZP_01043439.1|
RVIKVPQQDLKKAQQFINQNILSKME---PHE-CSVAFSPG----SKIYDAASEHCN--A-RWLLKFDIVSFFESITEKSVYRVF--RRYN---YPALLSFEMARIC---TALKARPPINWGGAPPNIRYRTIPGYSNKNLGTLPQ-------GAPTSPMLANLVSYNLD----RRLKLIADAYN--CHYSRYADDITFS--------TDSSLSRG-EVS-----RIIAMI------------NSTLREYG---HTMNKAKTTI---APP-GARKFYLGMNI
>gi|60493027|emb|CAH07807.1|
RTINSTNKDLKVIQKRLYNYLLSKTT---LPN-YFFGGIPK----KDNILNAKYHQG--N-KYVFTTDLKSFFPSINHKMVFYMF--LKLG---CTPEIARTLTKLT-------------------------------THNYQVPQ-------GVPTSTLIANLVFKPVG----DRIQALAKENN--IKFSIFVDDITMS--------SSIDFHK----------KIPEIL-------------SIITTSG---YKISHSKTFY-----K-TKNPIVTGVIC
>gi|62181269|ref|YP_217686.1|
RTIQEPIAQLKAVHRKI-GVLLSRIE---LPP-YLHSGRKK----HSTLTNVESHKL--A-TELLKLDIHKFFPSTRAAKVYKAF-VEKFE---MSPDVAYIMTNLS-------------------------------TFAGKVPT-------GSPISMAMAFWANKDMF----DELSNLAASNS--LVFTAYVDDVAFS---------GSKIPK----------GFAAQA------------KKCIRSHG---LTSKDKKERF---YPS-SEGKLLTGIVI
>gi|93453115|gb|EAT03589.1|
RVISSPRTFLKVVQYWILDYLLHPLP---CHP-NCHSYQKG----KSILSNSLPHVG--K-KYVANIDILNFFPSITERMVFDFL--KKNN---FGEQLSKSLSRIV-------------------------------TLNNGLPQ-------GAPTSPVISNSFLNKFD----EIISEKSLLLD--VSFTRYADDITIS-------GDRKENII----------SLIEIS------------EHYLNSIG---LKLNNKKTRI---ASK-GGQQRVTGIVV
>gi|89076261|ref|ZP_01162606.1|
RTISQPSKDVKIYQYAIIENVLNNLS---IHD-SATAYRKG----KSIYHNAFPHKD--S-MWILKLDFKDFFHSIRPEHLKSYLLDEIKG---ISSIEVDILNHYL-----------------------FWMD--KTDRKLKLSI-------GAPSSPIVSNIIMYKFD----ENVSNICSKFN--VIYTRYADDLTLS-------ANSRECLL----------ETEKEL------------KALVEETQIPLLVLNDKKRVL---IGE-HKSKRITGVVI
>gi|90407942|ref|ZP_01216116.1|
RDIFVGNEETKIFFKKVMNFLEKKYSDILSKNQCSHGFRKK----RSAISNAMCHMKLER-GYILSIDIKDFFSSIKKDMLRDII--------------SKKILDVC-------------------------------FIDDVLPQ-------GLSTSPVISNIVMCNIDHVIEKQLNSLGIKLDVNFCYSRYVDDLTISIYSDNVDDCFLKIQK----------KVHEMI------------KNILIFYG---FYLNESKTKY---GNL-NDNFHVTGISL
>gi|94310415|ref|YP_583625.1|
RNTYDAREPLKEVHRRIKSQILDHVN---YPA-YLTGSIKG----CDYKVNASLHAR--A-RIVINEDISGFFPSTSADRVFSIW-RGFFG---FSEDVARCLTQLT-------------------------------TRHGELPQ-------GAITSSFLANLVFWWDE----PELFGKFAAQG--LVYSRYVDDIAVS--------SKTFLTNE-AKT-----NVVRQV------------YGMLLKHG---YKAKRAKHEI---ATS-GSRMAVTKLAV
>gi|52215199|dbj|BAD47792.1|
RYISAPAGDFRSMQQTIYHRILLLAN---IHP-AVTGFCPG----KSVSDNARVHLG--R-KNVLKVDLHDFFPSIRSPRVRAAF--REMG---YSRPIAKVLAELC-------------------------------CLRCCLPQ-------GAPTSPALSNIIAYPMD----KKMMALAGEYG--LVYTRYADDLTFS---------GDYLPK--D-------EVLVRI------------HRIIREEG---FTMNVKKTRF---LSE-HKRKIITGVSV
>gi|113937250|ref|ZP_01423127.1|
RTIYAPATHLKIVQQKLSSILQLIYE---QKP-AVHGFVPH----KSIVSNAAMHLN--K-TYVLNLDLQDFFPSINFGRVRGLFMNQPYY---LNEEVATILAQIC-------------------------------CHRNTLPQ-------GAPTSPVISNMICAKLD----RELLRFAQANR--CVYTRYADDLTFS-------TNTRQPPS----------KLVRRTEATASIELGRDLVSIITANG---FQVHPEKSRL---QVK-GRRQEVTGLTV
>gi|118731333|ref|ZP_01579848.1|
RLISAPMPRLKRAQYWVLDNILAKVP---AHD-AAHGFLAG----RSIVSNAAPHAG--H-DVVINLDVKDFFPSIAFGRIKGVF--RHLG---YGEAIATLLALLCSENRAQA-----------WQVDGEKLFVGGKARERVLPQ-------GAPTSPMLTNLLCRRLD----RRLLGLARQLG--FVYTRYADDLTFS----ASGEAARDNVG----------RLLGRV------------RWILRDEG---FTPHPDKERV---MRK-GRRQEVTGLVV
>gi|116625419|ref|YP_827575.1|
RLIEIPKPRIKELQRRILHEILDAVP---VHA-AAHGFVHG----RSIATFAAPHTG--K-AAVLRLDLEDFFPAFPAARVQALF--RTLG---YPEPVADRLGGICANAVARE-AWKLRPPE--IASR-EWDAARILYGRPHLPQ-------GAPTSPALANLTAYRLD----CRLSGLARSSG--AVYTRYADDLAFS--------GGDEFAR--AVD-----RFQAHA------------AAVALEEG---FGVNHHKTRI---MRQ-GVRQHVAGVVV
>gi|118043046|ref|ZP_01511780.1|
RIIEIPKPRLRALQRKVLSGLLDRIP---AHE-SVHGFRHG----RNIVTFAAPHVG--K-AVVMRFDLTDFFASVHAGRVYSAF--YALG---YPQAVARALTALCTNRIPSG---RLLAPD--VRERIDW-RERQRYRNRHLPQ-------GAPTSPALANLCAFRLD----LRLAGLARSVG--ATYTRYADDLAFS--------GDEELAR--MAD-----RLCIRV------------AAIALEEG---FGVNLRKTRV---MRR-SARQHLAGVVV
>gi|117618233|ref|YP_856565.1|
RVIAQPTAELKKLQRAFINR--SKIP---VHE-CAMAYKDG----VSIKDNAQLHST--N-TFFLSMDFENFFNSITPDLLWGVF--NKFGKV-ISPNEKLWLSKLL-----------------------FWCPSKKNSNKLILSV-------GAPSSPKVSNFCMYFFD----EYISTYCQDRN--ITYSRYADDLSFS-------TNEKDILF----------QIPGVV------------KETLLKLFGRDITINNSKTVF---SSK-AHNRHVTGITI
>gi|108757904|ref|YP_633868.1|
RLLERPGLDLVLVQRKLLHDILDHIP---PHD-AAHGFVAG----RSVRRFAEPHAR--Q-AVVVRVDIEDFFFAVRPARIWAVF--RTAG---YPDGVVRALAGLCTNRTPSAVVSQARRPDSLADASTRWRLARR-LESRHLPQ-------GAPTSPALANLAAYRLD----VRLSALAEAMG--ARYTRYADDMAFS--------GGDALAR--RTH-----KLLRYV------------SQILREEG---FTPRTGKTRV---MHR-STQQRLAGVVV
>gi|111612943|ref|ZP_01400027.1|
RHIHAVTGELFKAHQFINTEILQKLE---PHV-ASFAFHAD----GGIRTCASEHCG--A-QWLFQFDLANFFYSVNEADVYGVF--VGLG---YRPLLAFEMARICTTTRLPKHLLPHLWTHRSHKSHGYQFYADRSGAMGVLPQ-------GAPTSPMLSNLVARRLD----EKLTEFSTQYG--FVYTRYADDLTLS--------CGGNLPRGMAIG-----NLHRKV------------TGIIRKNG---FRENLDKTRI---AGP-GSKKVVLGLLV
>gi|98660305|dbj|GAA02480.1|
RTIYAPDAEEKRALRGIVGILNQKCQHVCDPA-AVHGFMPL----KSPVTNALAHVG--R-KYTVSFDLEDFFDTVTPEKASKCL--------------TKEQKELV-------------------------------FVDGAARQ-------GLPTSPAVANLAATDMD----RAILKWIEKSGKSVVYTRYADDLAFS-------FDDPELIP----------VIQKKV------------PEIIRRSG---FRVNTDKTTV---QAAVAGRRIICGVAV
>gi|113936256|ref|ZP_01422151.1|
REIQQPKPVLRSVHDRV-GKLLSRIE---TPD-FLHSAIKG----RSYISNATTHCP--A-LPSVKVDIKKFYPSTRAHAVYHFF-LDRMQ---CAGDVAGMLAAML-------------------------------TVEGHLAT-------GSSASPILSFFAYEDMF----GEIAELAEVRG--CAMTCYVDDMVFT---------GKGATP----------RLLFEI------------RNIAKP-----YRLWTHKAFA---FGP-GQPKVITGLAV
>gi|113868455|ref|YP_726944.1|
REVLSPDDKLRAYHEFLRLFLLDFLP---QNEEVVFSYRKG----VSAYDAVSRHAQ--S-KFFFVCDIADFFPSLKRHRIRQTI--LSGKDSSPVADLDQWLERIL----------------------------DLVSVDDCLPM-------GFSTSPTISNAALLPFD----NAVQWYCASRG--LIYTRYSDDMVVS-------AKEFASLD----------GIEETL------------GAFFVEYMDGDLALHPGKSKL---LRT-GSKIRLLGMVL
>gi|116327817|ref|YP_797537.1|
REIQEPVYKLKSVHSKI-QKSLASIV---APE-FLFSGVKG----KSNISNASYHKD--G-NYIVTADIQSFYINCNKEHIFRFF-KYTLR---TSDDIARILTELC-------------------------------CYKTFLPT-------GSPVSQILAYHSYARIF----NRIDAFSKAND--ITFSLYVDDITLS--------SEKSIHR----------YILKTI------------SKLLKSVN---LSLKKEKTKF---YNK-NSYKIVTGCAI

#TERT: Telomerase RTs (TERT)
>gi|11463858|dbj|BAB18587.1|
TYYITMDIQKCYDTIILQKLLQFIEESKQ---FSSIYAINKYHIVSRNNR----------MLKPSFSMKDLFNILDRTCAIPFNKPQLLQKGYIEHIQKN---------KQTIIINQ---GFQNSVTFSEFLNSIKNICQNNI-----VQFEN---RYFRQTLGIPQGLNISGILCSFYLANLEQKL--TN-KILGD---------TLIMRLTDDYCCLAFSQDSSIKILNNFT-QIEKQYQIRLNHDKTQHNIERS----------------DRYFK----WIGK
>gi|17506433|ref|NP_492373.1|
IIGYTADVSKCFSTVNHDVLISIIDRLFS--QEHDIYTVCGK------------------GR-NHGGFHKLIFCSAGT-------------ELNAHEALRRKMEL----KGVFNFEV---CYREMSSSTTLYSVIRTTLSTYY-----YKRGP---TSWRITKGVPQGHPISSNLAHMYLNNFEQKY--WSNEKEDSR--------IVFCRYEDDFIFITTENSLFEKMMKPLS-TGNNTHFLTANPKKFKKSERCGAS---------------QVLQ----WCGV
>gi|50284761|ref|XP_444808.1|
LFYLKFDIHNCYDSIPIAKAKSVLNSLIN-NCGYEEFYVRSVTIL---------------NT-KNNEVRYDTIVNGHI----------NIRDFE------------------IMVDN---STTTFLTKEDIMDLIEFEMEMTS-----IRLFD---KCYLRKDGLFQGLSLSATIVDILYDDMLEKNRVFK-DILNND--------GLVLRHADDFLLISPSKEIISYARLKIN-EGFTEYNAQVNHRKIVFSESDNIA--------------NTAIP----FCGV
>gi|44985087|gb|AAS53865.1|
LFVLKFDIASCYDSIPMIKVTEVVQKLMK---DETCFYLRKMLIY---------------DT-KHHIIKRKSAVNGNL----------QAS------------------DGSIIIDN---SQTMYFSKEEIMSVLEMETKRTA-----FRWHG---NCFLRKDGIFQGSQLSSCLVDIVYDDLLESYKEFG-TPPGHA--------SLVMKLADDFLVISTSKEHVDRLKTLLH-HGFQDYNASVNRDKVMSFYSPELS--------------DPIFS----FCSV
>gi|50306115|ref|XP_453019.1|
LYLLKFDIQSCYDSIPVQKVMKLVEARIC---EEQQFFIRSQDIL---------------TT-ASTRLKRLHAVNGDI-------------QFQ---------------ENDLVIDS---VKTTVLSKEDVLTVVKMELFKTS-----IFYRG---KCYLRKDGLFQGTPLSSVLVDILYDDLLEFYTEFT-DENDSD--------PMIIRLVDDFLIVSTSKKYIERLNNLAQ-TGFKSFNTYINPQKVLVTSSESET--------------STNVP----FCAL
>gi|6226218|sp|Q06163|TERT_YEAST
LYFMKFDVKSCYDSIPRMECMRILKDALK---NENGFFVRSQYFF---------------NT-NTGVLKLFNVVNASR----------VPKPYELY------------------IDN---VRTVHLSNQDVINVVEMEIFKTA-----LWVED---KCYIREDGLFQGSSLSAPIVDLVYDDLLEFYSEFK-ASPSQD--------TLILKLADDFLIISTDQQQVINIKKLAM-GGFQKYNAKANRDKILAVSSQSDD--------------DTVIQ----FCAM
>gi|6716754|gb|AAF26732.1|
LFILKFDMKECYDRLSQPVLMKKLEELFENQDNKTSYYVRYYAQL---------------DA-SHKLKKVKTTIDTQY------------HNLNILSSSRHLS------NCKSLVDK---TKTIALQKGNILEVCRSQIYDVVGSVKDARGNL---HLYKRKRGVFQGFSLSSIFCDILYSAMVHDCFQFL-WKSKQD--------FLFVRLVDDFLLVTPDSNIYDQVHNILSGKILESYGAFVNKDKTVVVNQTTT---------------KTSID----FVGL
>gi|71896531|ref|NP_001026178.1|
FYFVKGDVSRAFDTIPHKKLVEVISQVLK-PESQTVYGIRWYAVIMITPT----------GK-ARKLYKRHVSTFEDF------IP--DMKQFVSKLQERTSL------RNAIVVEQ---CLTFNENSSTLFTFFLQMLHNNI-----LEIGH---RYYIQCSGIPQGSILSTLLCSLCYGDMENKL--LC-GIQKD---------GVLIRLIDDFLLVTPHLMQARTFLRTIA-AGIPEYGFLINAKKTVVNFPVDDI---PGCSKFKHLPDCRLIS----WCGL
>gi|115891701|ref|XP_781093.2|
LYFVKIDIEKCYDSIKHSKLLQIISMLLQGHDKPDEYQLQRYVTVTRAASA---------STGLQKRSHRHVTTELSS----------FHRQLIQMAHHGKI-------KNAIIINQ---VHTVKVTPKDLLQRLKQHVMADV-----VKSGR---KYYWRQDGISQGSILSSLLCSFFYAHLERCY--LS-DIDQE---------GLMMRLIDDFLLITPHHDKAQRFLQLLL-SGVKQYGCSANPSKTLANFDFMHD-------GQLVPRSKELFP----WCGI
>gi|22652870|gb|AAN03860.1|
TYFMSMDIHKCYDSIQLEFLLKFIEESNL---IQSAYVINKYYLIIRNNR----------QSRGSKQMRELFNIFDRTCAIPINNPQALQKGYIEYIQQN---------KLAIIANL---GIQTTVTFSEFLLSIKELCQNNI-----VQFED---RYFIQTLGIPQGLNISGILCSFYIANIEKNL--TR-KLIGD---------TLIMRLTDDYCCLTFDKQNLITIKNNFK-EVEKQYSIHLNDDKTQHNIDQKIV----------------SFK----WIGK
>gi|40740771|gb|EAA59961.1|
LYFVKLDIQSCFDTIPQAKIVRLVEKLVS----EENYHWMKYVEMRLASEFDNMWPLRKPQQ-RRTWSKYLQRVGPVG----------RPENLADAIANGSVVGR----RNTVLVDT---IAQKEYNGEGLLDILNEHIRNNL-----VKIGK---KYFRQRKGIPQGSVLSSLLCSLLYAEMERDV--LG-FLQTDD--------ALLLRLLDDFLLVTLDSGLAMDFLRVMV-RGQPDYGISVNPAKSLVNFAAVVD-----GAQIPRLVDTPLFP----YCGS
>gi|50419279|ref|XP_458163.1|
LFMLKFDMKHCFDNVSQDRILKSVEELFAEDSSDKVYYIRQFVES---------------SVFKQELKKQRYVIKNES----------NVQEYNILEGQCSNFQFNR--SPKIIVDK---AKTFRFRKSQVLETVREHVFHST-----MVLPNNTEKYFRRTKGVFQGLPLLATLCNLVYNSLVDENFQFL-LNDNSD--------SILLRLVDDFLVISTDRSQCQKVYDIVLGQEFQSSGAFVNTSKTYWAETTMDL--------------EDSIK----FVGL
>gi|6226780|sp|O14746|TERT_HUMAN
LYFVKVDVTGAYDTIPQDRLTEVIASIIK---PQNTYCVRRYAVVQKAAH----------GH-VRKAFKSHVSTLTDL--------QPYMRQFVAHLQETSPL------RDAVVIEQ---SSSLNEASSGLFDVFLRFMCHHA-----VRIRG---KSYVQCQGIPQGSILSTLLCSLCYGDMENKL--FA-GIRRD---------GLLLRLVDDFLLVTPHLTHAKTFLRTLV-RGVPEYGCVVNLRKTVVNFPVEDE--ALGGTAFVQMPAHGLFP----WCGL
>gi|70834469|gb|EAN79971.1|
VTMVRGDAARCYDHLPQEAVVNIMRGLVT----HETYYSLKLTVVTLTTVKNVSKKTR--SSHAESQLSSMKETNGSTVKHRKLQLSKRVKLVPGRYVQEGVLYGIA--RGCIAYEEQSVGSDSLVSGEEIRSVLQKHLQSHL-----VMLNG---KMYIQRMGINQGSAVAMLLCDQLLERVDAALSSIL-SEHEEP--------ALLLRRVDDVLVVTLSRAAASRCEDALR-SGWSEIGFFCQEEKLRRVTC------------------GQPVR----WCGL
>gi|12003360|gb|AAG43537.1|
FYFVKTDVKGAYDTIPHSKLDEVISKVIN-PNANEVYCIRRYATVSVDPT----------GR-IIKSFKRHVSELADV------LP--NMKQFVSNQQEKNLL------RNTILVEQ---NLLLNESSVKLLAVFQQIIRSHI-----LRIKD---RYYMQCCGIPQGSMLSTILCSLCYGDMENAM--LG-GIQKN---------GVLMRLIDDFLLVTPHLDQAKTFLRTLA-EGIPQYGCSISPQKTVVNFPVDDI---PECSEVEQLPSHCLFR----WCGL
>gi|47229475|emb|CAF99463.1|
LYFVKVDVSGAYDSLPHSKLIEVVNRVLT-PVLNQIFIIRRFAKIWANSH----------EG-LKKTFIRQADFLQEI------MGSVNMKTFVTSLQEKGKI------HHSILVEQ---HFSSDLQGEDALKFFTQMLTGSV-----VKFGK---KTYRQCRGVPQGSAVSSVLCCLCYGLMENVL--FK-DIIKNK--------GSLMRLVDDFLLITPDLRDAQTFLKILL-AGVPQYGLVANPQKIVVNFEDSES--TNSCPGIRVLPLRCLFP----WCGL
>gi|50258162|gb|EAL20856.1|
LYFIKTDIKAAFDSIKQDKMLEMLEDMLR---QSSEYRVILYSVLLPPGHKAYQ------GT-SKRFFKSRAIPTEDV-----------SLTFADHAKEIAASM-----RNATIVDM---VRRYSVTTQECLDLLRTHIKDNV-----WQVGK---QYYRQKTGIPQGSKVSTLLCTMFYSYLENEH--LS-WTRREG--------SLLLRYIDDFLFITDNYNLARRFVDVMS-RGFPEYGARISVDKTLLSFEYDTGKQLAPVCGVNEQGDVADFP----YCGF
>gi|42545017|gb|EAA67860.1|
LYFAKTDVKAAFDTIPQEAVVELMKSVPS----QTNYTIMKHVEVKPGERAVIDDD----KYSSKAIRRWHATALSEN----------ESSVFVERLEKDLAPKK----KNTVFVDS---AFRRTKNVGELMHLLRQHVEQNL-----VLVGK---KYYRQKVGIPQGSVLSSFLCNYFYADLEAKH--LG-FLDSPD--------CLLLRLIDDFLLVTLDQNKAAKFVNAMH-GGFPEYGVAVNPAKTMVNFDMLYA-----GEPVRNYNHEKGFP----YCGT
>gi|6226782|sp|O13339|TERT_SCHPO
KYFVRIDIKSCYDRIKQDLMFRIVKKKLK----DPEFVIRKYATIHATS-----------DRATKNFVSEAFSYFDMV----------PFEKVVQLLSMKT--------SDTLFVDF---VDYWTKSSSEIFKMLKEHLSGHI-----VKIGN---SQYLQKVGIPQGSILSSFLCHFYMEDLIDEY--LS-FTKKKG--------SVLLRVVDDFLFITVNKKDAKKFLNLSL-RGFEKHNFSTSLEKTVINFENSNG----IINNTFFNESKKRMP----FFGF
>gi|100815792|ref|NP_001035771.1|
LYFVCCDVINAFGSIIQVELYNIIQSLCK--DLPENLILKYYTMKSEISKK---------DNTYHKYFSDLQLPFPSD-------------QFYAN-----------------LVDN---QWYQLINKSWLLESISKYIFYQR-----IKINK---NIHIIGKGIVQGSMLSPILSDIYYNYILNKE--MSTYLKT----------GEIIKYMDDILYITENKTLAEQFLELTK-KGIPQYNCYFKQSKTQSNLISDRN-----------KIVKKNII----YIGY
>gi|49648600|emb|CAG80920.1|
LKFVKIDVTAAFDTIPASKVKDISKRLLD----CESYSLHSHSRILPMSS----------KT-VLRWFTTSRACNGRS--------EGALQAFRRLG------------NKGIIVDE---NKSDSVGKQLLYKLLNDHLFRND-----VFIDG---QVHRQVRGIPQGSILSSLFCSMVYEEMVREK--FSDLVDRPD--------TCLMRFVDDFMLITTDTAIATEFLNRAL-KGLPDYGVSVNRSKCLVNFPLSVG-----GVRIAQLEEGEMMP----FLGM
>gi|6226215|sp|O00939|TERT_EUPAE
LFFATMDIEKCYDSVNREKLSTFLKTTKL---LSSDFWIMTAQILKRKNNIVI-------DS-KNFRKKEMKDYFRQKFQKIALEGGQYPTLFSVLENEQNDLNA----KKTLIVEA---KQRNYFKKDNLLQPVINICQYNY-----INFNG---KFYKQTKGIPQGLCVSSILSSFYYATLEESS--LG-FLRDESMNPENPNVNLLMRLTDDYLLITTQENNAVLFIEKLI-NVSRENGFKFNMKKLQTSFPLSPS--KFAKYGMDSVEEQNIVQDYCDWIGI
>gi|116502465|gb|EAU85360.1|
LYFVKVDVQACFDSIEQTKLLEILRELIS-----KAGLIRYSHFL---------------GY-CSRFNRTLMSPNAMA---NSIFPQIALRERHDTHFVKTAQDLSRTLRNIIFVDQ---VRYPEETKDNILELLEEHITDNT-----VKIGK---HYYKQKVGIPQGSVLSALLCSFFYGDLERRT--MR-FTEDIE--------SVLMRLIDDYLFITTSLKKAKAFLEMMN-NGHPEYGCFISKDKTLTNFDYGTD-----VMNVVDPSSSKNFA----WCGY
>gi|116057341|emb|CAL51768.1|
PCILATDIKGAFDNLPLESLERVATNLIS----SCSYQALHYAVVKHNGE----------AK-YKKLVSSLGASGSEE------TPGPLYTEANRRTNTGGVAILKRESRNSIVVDA---GFAKTISDANVAPLLRAHLRENI-----VSARG---KYLLQTVGIPQGSIVSPLLCSLFYGHLEHEYRLLS-EFCSDH--------STVCRWMDDILVVGTDKEKAASFFRACK-RSFEEHGCSLNEEKTLCNFDHGED---IQQKTFVNADGRSYIP----WCGL

#RT_G2_intron: RTs with group II intron origin
>gi|22536745|ref|NP_687596.1|
RPLGIPTVRDRVVQTAVKIVIEPIFEADFQEFSY-----GFR---PKRSANQAIREIYKYLN---YGCE-WVIDADLKGYFDTIPHDKLLLLVKERVTDKSI----IKLLSLWLEAGIME---------DNQV----------------------------RSNI-LG-TPQGGVISPLLANIYLNALDRYWKNNR-----------------LEGRGHDAHLIRYADDFVILC-------SNNPKKYY----QYAKQRIDK-LGLTLNEEKTRIVH
>gi|68549663|ref|ZP_00589124.1|
RMLGVPTVADRVAQSVVKMVLEPILEPVFHEDSY-----GYR---PGRSAHDAIAVVRKRNW----EYD-WVVEFDIKGLFDNIDHELLMRALRKHCQTPWV----FLYVERWLKAPMET--------PEGEL----------------------------IERT-KG-TPQGGVVSPLLANLFLHYAFDRW---------------------VSENLPGVPFCRYSDDGVLHC----K-SKIQAELVK----RKIGERFRE-CGLELHPDKTQIVY
>gi|30020772|ref|NP_832403.1|
RPLGIPTIKDRVYQNIVRNALEPQWEARFEAISY-----GFR---PKRSTHDAIRSIFNRIN-GGTKKK-WIVEGDFQGCFDHLNHEWILKQTSYFPG--------RKLLKRWLKMGYME---------QSFF----------------------------AETQ-EG-TPQGGIISPLLANIALHGMEETLGITYKKNYKANDSY-------IMNPACKFTLIRYADDFVVLT----E-TKEQALSVY----MRLRPYLKD-RGLELSPEKTKVTH
>gi|3337033|dbj|BAA31792.1|
RPLGIPTMKDRAMQALYLLALEPVAEVTADQRSF-----GFR---TGRSTADAIAQCFCVLA-QKTSAE-WVLEGDIRGCFDNISHQWLIDNT------STD----RQILTKWLKAGYRE---------KGQL----------------------------FPVN-SG-TPQGGIISPVLANIALDGLEALLASEFKKRTVK-----------GRLVNPKVNYVRYADDFIITG----E-SKELLESQVL---PVVRRFMAE-RGLMLSPEKTKITH
>gi|113939021|ref|ZP_01424882.1|
RPLGIPTIKDRVVQEMVRLILDPIYESTFYRHSY-----GFR---PYRATHHAVVRLRDLIG--RRGYQ-MALEGDIRACFDRIHHTTLIRILRRTIKDERL----ITVIHQMLKAGVMD---------DGQW----------------------------RVTE-DG-TPQGGIVSPLLANIYLNELDQWVANRWDTYTPLERYYHR-----KAGTGYPCQITRYADDFVVLL----HGTHAEATTLK----TALATFLADHLHLELSAEKTLITP
>gi|42520940|ref|NP_966855.1|
RPLGIPTIKDRAMQALYLFALEPIAETISDRHSY-----GFR---PKRSCADATVACHLLLA-SRNQLQ-WILKGDIKWCFDNINHEWLMKHI------PME----KKILHSWLKAGFLE---------SKTL----------------------------YSTT-AG-TPQGSIISPILANLALNGLEKSLESQFGKLGSKR----------RSKIRSGVNVIRYADDFIISG----I-TREVLENEVK---PLVSSFLQE-RGLILSEEKTKITS
>gi|93452894|gb|EAT03405.1|
RPLGIPTIKDRVVQTAVLLVIEPIFEADFEDCSH-----GFR---PGRNAHGALSEIRQALK---EGYR-EIFDADLSSYFDTIPHDQLMACVERRIADRSL----LKLIRMWLSSPAVE------GGVDGGK----------------------------RTRPQVG-TPQGGVVSPLLANIYLHEFDKKFNGAE-----------------GPGQTMDVRLVRYADDWVALA-------RRIDHRLS----DFVETTLDG-LGLTLNRDKTSTVN
>gi|94311815|ref|YP_585025.1|
RPLGIPTLHDRAMQALYLLALEPVSEGTSDPNSY-----GFR---INRSTADAMSQLFVSLS-KKASAQ-WVLEADIKGCFDHISHDWLERNV------PMD----KAILRKWLKAGVVF---------QSQF----------------------------QATD-AG-TPQGGIISPTLANVALNGLERDLMKFLRTKLGT-----------VQANRLKVNVVRYADDFVITG----N-TPEVLEHEVK---PWVEQFLAV-RGLTLSPEKTRIVN
>gi|38259488|emb|CAE51716.1|
RPLGIASLEDKIVQYALVKILNAVYENDFMGFSY-----GFR---PGRSQHDALDALATGLV--RTNVN-WVLDADISQFFDRVSHEWLIRFTEHRIGDRRV----IRLIRKWLTAGTSE---------EGQW----------------------------RATE-EG-TPQGAVISPLLANIYLHYVFDLWAHQWR----------------RRYATGNVVMVRYADDIVIGF----D-KRYDARRFR----IAMQRRLRE-FGLTVHPEKTRLME
>gi|32471097|ref|NP_864090.1|
RPLGIPTVRDRVVQTALVNVIEPIFDNEFHERSF-----GFR---HGRSCHDALRVVEELLE---TDHV-FVVDADLQGYFDTIPKDRLLALVSEKISDRRV----LDLVKRFLDQSILE---------ELRE----------------------------WTPE-SG-VPQGAVLSPLLSNLYLNELDHRM------------------------ADLGYEMVRYADDFVILC----R-SQEQAELAL----EEVKRFVCE-AGLTLHPEKTHIVD
>gi|22298704|ref|NP_681951.1|
RPLGIPTMKDRAMQALYALALEPVAETTADRNSY-----GFR---RGRCTADAAGQCFLALA-RAKSAE-HVLDADISGCFDNISHEWLLANT------PLD----KGILRKWLKSGFVW---------KQQL----------------------------FPTH-AG-TPQGGVISPVLANITLDGMEELLA--------------------KHLRGQKVNLIRYADDFVVTG----K-DEETLEKAR----NLIQEFLKE-RGLTLSPEKTKIVH
>gi|91215025|ref|ZP_01251997.1|
RPLGIPTVSDRIAQQVVKQYLEPRLESIFSKNSY-----GYR---PNRSAHTAIEIVRLNVL----RYS-WVIDLDIQEFFENVDHSLLLKALERHVSEKWV----LLYIKRWLEAPVIL--------EDGTV----------------------------KISTGKG-TPQGGVISPLLSNLYMHYCVDKW---------------------LEKYYPQVKMVRYADDLIVHC----R-SYEESVHTL----AVLKERLTE-CGLTAHPEKTKIVY
>gi|91204437|emb|CAJ70937.1|
RPLGIPVIKDRVVQMSVKLVIEPIFEADFEDSSY-----GFR---PGRSAGDAVRKIKEKLR---EGKT-EVFDADLSSYFDTIPHKELLLLIGMRISDKNV----LHLIKMWLKAPVIE---------EGKP-------------------------GGGRKNK-IG-TPQGSVISPLLANIYLHMLDKAVNREN-----------------GVFYKYGITIIRYADDWVLMA-------KRIPREAL----DYLNRLLKK-LKLSLNEDKSKIVK
>gi|68551894|ref|ZP_00591288.1|
RPLGIAALEDKIVQRAVVAILTPIYEAEFLGFSY-----GFR---PGRSQHDALDALAYGIK--VKKIN-WVLDADISRFFDTISHEWMIRFLEHRIGDKRI----VRLIIKWLKTGVLE---------DGVR----------------------------NEAE-EG-TPQGAVISPLLANIYLHYVYDLWAKQWK----------------EKHCKGDMVVVRFADDSVAGF----Q-NKEDGERFL----ADLRDRLAK-FALTLHPEKTRLIE
>gi|90203633|ref|ZP_01206278.1|
RPLGIPTVRDRVAQAAAKIVLEPIFEADFMSCSY-----GFR---PKRSATQAMERLRVGFI---EGSQ-FVVEFDIANFFGEIDHDRLLAEVSRRVSDRRV----LKLLRLWLQAGVMV---------DGVV----------------------------SRTV-AG-TPQGGVISPLLANIYLHVLDTEL-----------------------ARRNVGELVRYADDGVVLC----R-SAAQAEHAL----AAVGEILAS-LGLRLHPDKTKVVD
>gi|116621672|ref|YP_823828.1|
RPLGIPTVRDRVVQMATLLILEPIFEADFLDCSY-----GFR---PGRSAHQALEEIRGHVE---AGYQ-AVYDADLKGYFDSIPHTQLLACVRMRVVDRSV----LKLIRMWLEAPVVE---REEGGGGSKW----------------------------SRPE-KG-TPQGGVASPLLANLYLHWFDALFYGPE-----------------GPGGKADAKLVRYADDFVVMA-------KQMGTETI----EFIESRLEGKFQLEINREKTRVVD
>gi|114844631|ref|ZP_01455073.1|
RPLGIPCYEDKLVAAVMADILNEVYENIFLDTSY-----GFR---PGRSCHDAIKELNRIIG--RCKIS-YVLEADIKGFFDNVDQKQLMEFIAHDIDDKNF----SRYIVRFLKSGIME---------EGKY----------------------------HESD-KG-TAQGSPLSPILANIYLHYTLDVWFAYLKR---------------NGKFRGEAYIVRYADDFVMLF----Q-YKSDADKMY----EALPKRMAK-FGLELAMDKTKILP
>gi|4106929|gb|AAD03096.1|
RHLGIPTIRDRAKQCLVKFALEPQYEAIFEPNSY-----GFR---PGRSSNDARQAIVKCLQ---QLPK-HVLDADIERCFDNIDHSKLIHGINTF---PLL----REQVRAWLKACILT------GFKENIK----------------------------EVIPEAG-TPQGGIISPLLANIALHGMEKAV------------------------CKSGVYLIRYADDFLILC----N-EEKELSEAK----NKIEIFLQN-LGLKLSESKTKITY
>gi|98660302|dbj|GAA02477.1|
RPLGIPTVRDRVVQQALLNILQPIFEPGFHPSSY-----GYR---PGRSCHQAVAKAERFMN--KYGLE-YVVDMDLSKCFDRLDHELILEEVNRKISDGSV----LKLIKKFLTAGVMK---------DGQW----------------------------DEID-TG-SPQGGVISPLLANIYLDRFDQAM------------------------KSRGIRIVRYADDILVFA----R-TRKEAGNYR----QVATQILEGELKLEVNKEKTHLTS
>gi|58696892|ref|ZP_00372402.1|
RGLGIPSTEDKLVQVMLKKILENIYEANFMDSSY-----GFR---PGRNCHQAINALDKAVM--HKPIN-YIVEVDIKKFFDNVQHKWLMNCLRERIADPNL----LWLIKRFLKAGIVE---------VGCY----------------------------KATD-QG-TPQGGIVSPVLANIYLHYVLDLWFEKKF----------------KPKARGYLQLIRFCDDFVVGC----E-REEDAKEFL----ELLKQRLSK-FGLEIAENKTKIVK
>gi|17232933|ref|NP_489471.1|
RPLSIPTLYDRALQSLVKLALEPEWEARFEPNSF-----GFR---PGRNAHDAMKAIFNTIK---FKPK-YVLDADIAKCFDKIDHNVLLSKLNTF---PTI----SRQIRAWLKAGVID---------FSEYA---------------------LREKSDHTTS-MG-VPQGGTISPLLANIALHGMENRIKQVALTLPGC-----------KSENRQAISLIRFADDFVILH----K-DLAVIQRCQ----QIISEWLSE-LGLELKPSKTRISH
>gi|29826766|ref|NP_821400.1|
RPLGIPVIRDRVDQARFKNALEPEWEARFEARSY-----GFR---PGRGAWDAIEMIFNVAGRRTAKRL-WVLDADLSAAFDHISHQHLMDSVGLFPG--------RRQIQQWLRAGVME---------DGRF----------------------------VSTP-EG-TPQGGVISPLLMNIALHGMGEVIGANRP----------------WNAKTTSPTLVRYADDFVVFC----T-TENEAIKAK----QDLAAWLEP-RGLSFNEEKTRVVH
>gi|29347707|ref|NP_811210.1|
RPLGIPTMKDRAMQALYLLALEPVSETTADSNSY-----GFR---KERSTGDAREQCFCVLA-KKASPE-WIMEGDIQGCFDHISHEWLLNNI------PMD----KVMLRKWLKCGFVF---------NKEL----------------------------FPTE-EG-TPQGGIISPTLANMTLDGLQTMLAEKYHKKFVTRK---------TTTYYPKVHLVRYADDFIITG----R-NKEALEEIK----PLVVDFLKE-RGLTLSEEKTKITH
>gi|98662632|dbj|GAA00503.1|
RPLGIPTIKDRIAQMACLTVIQPIFEADFLDCSY-----GFR---PKRNAHQAIGAITENIK---QGFT-AVYDADLTKCFDSIQHRLIMDSLAERITDGKV----LRLIKGWLEAPIVE--------PGGPK---------------------------QGRKNYQG-TPQGGVISPLLANIVLNRLDRLWHRPG-----------------GPRERYNARLVRYADDFVVLA-------RFIGEPIK----NELESIITS-MGLNLNEKKTRILD
>gi|115377048|ref|ZP_01464265.1|
RPLGIPTFEDKVAQRAIVLLLEPIYEQDFRPFSF-----GFR---PGRSAHQALRELRSSIL--ERNGR-WVLDVDLRRYFDTIEHGKLREVLARRVADGVV----RRMIDKWLKAGVLE---------EGPL----------------------------LRLE-QG-TPQGGVISPLLANVYLHYVLDEWYEREV----------------VPRMKGKCSLIRYADDLVMVF----E-DFLDCRRVL----EVLGKRLAK-YGLTLHPGKTRMVD
>gi|20091619|ref|NP_617694.1|
RILGIPTVLDRVAQMVTKIYLEPQLEPLFHPDSY-----GYR---PGKSAADALAATRKRCW----RYN-WLLEFDIKGLFDNINHDLLMKQVSMHTDKPWI----ILYIQRWLKAPFQM--------ADGTV----------------------------NERT-KG-TPQGGVVSPLLANLFLHYAFDQW---------------------MDSHHRYNPFERYADDSVIHC----R-SKKDADRLR----IKLEKRLSE-FGLELHPTKTRIVY
>gi|113944057|ref|ZP_01429758.1|
RRLGIPTVADRVVQAALKLVLEPIFEADFLPVSY-----GFR---PKRRAQDAIAEIHYYGT---HGYR-WVLDADIEACFDSIDHVALMDRVRTRIKDKRV----LTLVKAFLKAGILT--------ELGDR----------------------------RDTH-TG-TPQGGILSPLLANIALTVLDEHLMAGWRPDATMASEYRRAQ--LRKRGEATWRLVRYADDFVVLV----HGGEDHAQALR----EDVATMLAP-LGLRLSPAKTRVVH
>gi|34980273|gb|AAQ84048.1|
RLLGIPTIKDRCLQALFKLALEPEWEAKFEENSY-----GFR---PGRNCHDAIAAIRAFVQ---KRPN-YVLDADIAKCFDRIKHEELLNKIGMIGKYRKQ----LKY---WLKSGVLD---------QDVF----------------------------KTTE-LGPYPQGGIISPLLANIALHGMEEFCKNLIKDIPVSGSTGILVK---RAQRIDMLGFVRYADDFVIMH----P-DLDIILLIK----DKIPEFLGS-IGLELSPTKTRVTH
>gi|51892932|ref|YP_075623.1|
RMLGIPTVMDRLIQQALLQVLTPIFDPTFSESSY-----GFR---PGRRGHDAVRKARQYVE---EGYD-WVVDMDLEKFFDRVNHDVLMARVARRVTDKRV----LRLIRRYLQAGVML---------NGVV----------------------------VATE-EG-TPQGGPLSPLLANILLDDLDKEL------------------------ERRGHHFVRYADDCNIYV----R-SKRAGERVY----RSVRHFLQERLRLKVNEEKSAVDR
>gi|118031948|ref|ZP_01503400.1|
RPLGIAALEDKLVQSVMVDVLNAIYEEDFLGFSY-----GFR---PGRNQHDALDALAAAIQ--WRPVN-WILDADIRSFFDTVNRQWLIRFVKHRVADPRV----IRLIGKWLDAGVLD---------NGRL----------------------------MSVQ-AG-TPQGSVISPLLANIYLHYVFDLWIERWR----------------RQRARGTVIVSRYADDTVVGF----Q-YEADALLLL----KDLRQRMEE-FDLTLHPEKTRLLE
>gi|113941958|ref|ZP_01427728.1|
RPLGIPTMHDRAMQALHLLALAPIAETTADPNSY-----GFR---SERAPADAIGQCFVALA-KRKAPT-WILEGDIRSCFDRISHDWLLAHV------PMD----KAILQKWLKAGYME---------GTTL----------------------------YPTE-HG-TPQGGIISPVLANLALDGLERILLEHCPRRT-------------VRGIAAKVNLVRYADDFIITG----R-SRELLEQTVK---PLVEAFLKE-RGLELAPEKTRITT
>gi|88858898|ref|ZP_01133539.1|
RPLGLPTVDDKLVQQGVSQILQSIWEADFLPNSY-----GYR---PNKSAHQALHSLALNLQ--FKGYG-YIVEADIKGFFNNLDHNWLMKMLKQRIDDKAM----LSLISQWLKARIKS--------PEGVF----------------------------EYPK-SG-TPQGGIISPVLANIYLHYALDLWFEKKV----------------KPRMRGRAMLIRYADDFVCAF----Q-YANDAERFY----EVLPKRLKK-FNLEVAEEKTSLLR
>gi|76795889|ref|ZP_00778259.1|
RLLGIPTALDRLIQQAIAQILNRVYNHTFSDSSY-----GFR---PGRSAKDAIKAAEAYIN---EGYT-WVVDMDLEKFFDRVNHDIIMSKLEKRIGDKRV----LKLIRRYLESGVMI---------NGVK----------------------------VSTE-EG-TPQGGPLSPLLANIMLDELDKEL------------------------EKRGHKFCRYADDCNIYV----K-SRSAGNRVM----KSIKKFIESKLKLKVNEAKSAVDR
>gi|116621135|ref|YP_823291.1|
RPLGIAALEDKIVQHAVGRVLNQIWEEDFLGFSY-----GYR---PGRNQHDALDALSVGIM--RKKVN-WVLDLDVRSFFDKVDHKWLVQFVEHRIADPRI----VRLIQKWLKAGVME---------DGRW----------------------------FETE-EG-TPQGSVISPSLANLYLHHVLDLWVEAWR----------------KKIAKGDVIVVRYADEAVLGF----Q-YREEAEGFL----KELQERVAK-FGLELHPEKTRLIE
>gi|575622|emb|CAA54637.1|
RILGIPTVSDRIAQTVVKLAFEPQVEPHFLADSY-----GYR---PNKSALDAIGVTRKRCW----YYD-WVLEFDIKGLFDNIPHELIMKAVDKHNPARWV----KLYIQRWLTAPMVM--------SDGEV----------------------------RART-MG-TPQGGVISPLLANLFMHYVFDKW---------------------LAKYYPKVPWYRYADDGILHC----H-SEAEATEMR----EVLRKRFSE-CGLEMHPEKTRVIY
>gi|91218535|ref|ZP_01255473.1|
RKLGIPTISDRVGQMVVKMFFEPRLELVFSPNSY-----GYR---PKRSAHQALSRVRENCW----KKN-WVIDLDIKGFFDNIDHNKLMLAVEKHVPENWV----KLYITRWLEAPVVT--------KSGKL----------------------------TQRKGKG-TPQGGVISPLLANLFLHYAFDTW---------------------LEKVDKNVVFTRYADDVILHC----N-TKAHAEQIL----QLVHQRMES-VGLELHPKKTKIVY
>gi|82746451|ref|ZP_00908957.1|
RPLGIPTMYDRAMQTLYALALEPIAETKGDSISF-----GFR---RGRSAKDACEQIFCVLA-RKCSPT-WILEGDIKGCFDNINHEWLQNNI------PMD----KIIMKQFLKSGYIY---------EEKL----------------------------FPTE-TG-SPQGGAISSIYANMTLDGLEKVIQDKYHRNSKGKIEN-------HYRAKTKVNLIRYADDFVITA----N-SKEIAEELK----TTVSQFLQS-RGLALSEEKTAITH
>gi|15613174|ref|NP_241477.1|
RKLGIPTVMDRFLQQAIAQILTQLYDPTFSERSF-----GFR---PHRRGHNAVRQAKQWMK---EGYR-WVVDIDLEKFFDKVNHDRLMRKLSSRIQDPRV----LQLIRRYLQTGVME---------RGLV----------------------------SPNT-EG-TPQGGPLSPLLSNIVLDELDNEL------------------------EKRGLKFVRYADDCNIYV----R-SKRAGLRIM----ESVTSFIENRLKLKVNREKSAVDR
>gi|15147719|emb|CAC50820.1|
RPLGIPNMYDRGLQYLWKLALDPIAECRADRHSY-----GFR---KGRSTQDVHTILHLLLS-PKSRCD-WVLEADIRGFFDNINHDWIIQNI------PMD----KNILREWLKAGALE-------TTTQEF----------------------------HKGI-AG-VPQGGPISPLIANMTLDGLEVWVANSVKHLYKKSK---------ETSWSPKVNVVRYADDFVVTA----A-TKRILEDIVK---PSIQDFLAS-RGLVLNQEKTCITS
>gi|91773973|ref|YP_566665.1|
RPLGIPTMYDRAMQALYALALDPIAEVTADKRSF-----GFR---KFRSTHDACSQIFGTIS-KKDSAQ-CILEGDIKGCFDNISHQWLIDNI------PMD----KSILKQFLKAGFVY---------ENSL----------------------------FPTK-AG-TPQGGIISPILANMTLDGIEGVLADKYHRGVSGKITT-------RQRAKHKVNFVRYADDFIVTA----K-TKEIAEEAK----ELIKNFLTD-RGLELSDEKTLITH
>gi|86741015|ref|YP_481415.1|
RPLGIATLEDKIVQRAVVEVLNAVFEEDFVNFSY-----GFR---PGRSQHMALDALAVGIQ--RKRVN-WVLDLDIKEFFSSLNHQWLVRFLEYRIADKRL----LRLIEKWLRAGVVE---------NGEW----------------------------AETT-VG-SPQGASASPLLANVYLHHVFDLWAQWWR----------------NHNAHGDVIVVRFADDAIVGF----Q-AEDDARRFL----ADLRERFAK-FGLELHPDKTRLIE
>gi|117925277|ref|YP_865894.1|
RVLGIPSIRDRVVQGALKLILEPIFEADFQSGSY-----GYR---PKRMAHQAVNRVAIAIA---QGKT-QVIDADLKSYFDTVQHDLALRKVSERVDDDQV----MHLLKLIFKT-------------SGK----------------------------------RG-VPQGGVISPLISNLYLNEVDKMLERAKEVT--------------RKGKYTHIEYARFADDLVILVDGHHR-WNGLARKVY----QRLGEELAK-LKVQLNLEKTRVVD
>gi|82747933|ref|ZP_00910425.1|
RPLGIPSYEDKLVQMALNKILQSIYEAEFKDFSY-----GFR---PKRNCHSAIKALNKVIE--NGRIN-YVVDADIKGFFNNVNHEWMIKFLEVRIGDPNI----ISLVKKFLKAGLMD---------NGII----------------------------KTTE-IG-TPQGSIVSPTLANIYLHYSLDLWFEKVI----------------KRNFRGQSEITRYADDFVCCF----Q-YESEARQFC----RLLVSRLNK-FNLEVERTKSKLIL
>gi|49146402|ref|YP_025510.1|
RPLGISAIENKIVESGIMLILQSIYEQDFLECSY-----GFR---PGRNTHQALNEVDKAIM--TQPVN-HLVEADIKGFFDNVSHEKLKDFVKIRVKDTSL----LHLIDCFLRAGYID---------KGVL----------------------------IDTE-KG-TPQGSILSPMLANIFLHYVLDKWFEDTV----------------KQHVEGFCRLVRYADDFVCLI----Q-YQEDARKIE----RALANRFNK-HELQLHPEKSRNIS
>gi|91201360|emb|CAJ74420.1|
RPLGIPIVKDRIVQQAFRQIIEPIFEKGFSDNSF-----GFR---PDRCCHDAIKRLEQYKQ---EGYT-SVLDADIMAFYDTIPHKLIMDSLREKIADGWV----LNSIENMLKAGVME---------DGIV----------------------------HETN-KG-TPQGGVISPLLANLIGDIIDKEL------------------------EKAGYKFVRYADDFVVMT----K-TKDELPAAL----SYVKEIIAGKLGMKLSEDKTKLTN
>gi|87133431|gb|ABD24341.1|
RTLQIPCIRDRVVQGALKLILEAIFEADFCPNSY-----GFR---PKRSPHQALAEVRRSIL---RRMT-IIIDVDLSRYFDTIRHNILLEKIAKRVQDPQV----MHLVKQVIKA-------------TGKI----------------------------------G-VPQGGPFSPLAANIYLNEVDWTFDTIRRKT--------------ADGNYEAVNYHRFADDIVIAVSGHSS-KSGWAELAL----RRLWEQLKP-LGVELNLEKTQMVN
>gi|91218170|ref|ZP_01255119.1|
RVLGIPTIRDRVVQMAVKMLIEPLWEADFEHTSF-----GFR---PKRGAKDAIKQVKQNIY---DRHQ-FVYDADLSKYFDTIPHTKLFILLKKRLVDHSI----LSLIHQWLTAPVRL--------PNGKL----------------------------VAST-KG-SPQGGVISPLLSNIYLHAFDQIVNNPK-----------------GKFAKANIRIVRYADDFLLMG------KWYFSKEIL----DYITSIMDN-MGLTLNKEKTKLLH
>gi|108757513|ref|YP_633367.1|
RVISIPSIRDRVVQGALRLVLEPIFEADFSGSSF-----GAR---PGRSAHEAIDTVRQGLR---RRRH-RVVDVDLKAYFDSIRHAPLLERVARRVQDGEV----LALVKQFLRS-------------TGD----------------------------------RG-IPQGSPLSPLLANIALNDLDHVL----------------------DRGRGFLTYARYLDDMVVLA----P-DSEKGRRWAARALERIRQEAEA-LGVSLNKEKTRTVT
>gi|75758415|ref|ZP_00738538.1|
RTLGIPTVEDRVAQMVAKLYFEPNVERLFYEDSY-----GYR---PNKSAIQAIEATRKRCW----RKD-WVLEFDIKGLFDNIRHDYLIEMVKRHTNQEWV----TLYVQRWLITPFQM--------EDGTL----------------------------IERT-AG-TPQGGVISPVLANLFLHYTFDDF---------------------MVKEFSSIPWARYADDGIAHC----T-SLKQAKYLQ----RRLEERFKL-FGLELNLEKTKIAY
>gi|24369939|gb|AAN57785.1|
RILGIPTVSDRIAQGAIKLFMEEKLDPIFHADSY-----GYR---PGKSAHDALKQCAIRCW----RYS-WILEVDISAFFDHVRHDLVLKALEHHGMPKWV----ILYCRRWMEAPMQS-------CENGEL----------------------------ITRT-RG-TPQGGVISPLLANLFLHYAFDLW---------------------MEREYRGVPFERYADDIVVHC----S-RMSDATRLK----NRLSERFSE-VGLVLNAGKTNIAY
>gi|29348025|ref|NP_811528.1|
RPLGIPTVSDRVAQMAVVMLITPSIEPCFHEDSY-----AYR---PHRSAHDAVGKARERCW----KYA-WVLDMDISKFFDTIDHELLLKALKRHTQEKWV----LMYIERWLKVPYEK--------SDGSQ----------------------------VDRA-LG-VPQGSVIGPVLANLFLHYTFDKW---------------------MEKNFPRVPFERYADDTICHC----H-SLKQAEYMQ----AMIQQRFEC-CRLRLNEEKTKIVY
>gi|14518322|ref|NP_116805.1|
RQLGIPTVQDRLVQQAIAQQLSKRYDPTFSQYSY-----GFR---KGRNAHQALRQAGAYVK---EGFN-YVVDLDLEKFFDKVNHDRLMWLLGRRISDKRV----LKLIGKFLRSGILI---------GGLE----------------------------NQRI-SG-TPQGSPLSPLLSNIVLDELDKEL------------------------ERRGHRFVRYADDMILLV----R-SQEAAERAY----SSITSFIENRLLLKVNKDKSRICR
>gi|46915908|emb|CAG22679.1|
RLLGIPAVRDRIVQQCLSTIMTPIFDPDFHPSSY-----GYR---PGRSCHQAISKATMFIR--KYGRR-HVVDMDLSKCFDMLDHDVIIQSVKRRITDGSI----LKLIDKFLKSGIMI---------GGVW----------------------------QESE-LG-SPQGGVFSPLLANIYLDAFDQEM------------------------KQRNHRIVRYADDILILC----C-TQTAAEHAR----KVTSHILEKKLKLIVNERKTHIAH
>gi|113478104|ref|YP_724165.1|
GPLGIPTVKNRVAQAVVKNGLEPIWDAEFETNSY-----GFH---PGRSCHDPLEQFWIRLQ--KGKDT-WILDVDIKQDFDNITHEYILKAIGEIPG--------RELIKQWLKAGYLE---------AEVF----------------------------HKTE-GG-TSSRGIISPLLANIAFDGMERLLARYKTVKTYQCTRPTTDEEYTKKKKLDKYGFIRYADDFIITA----R-SEEDIKAII----PTIEKWLSE-RGLELNKDKTNLVH
>gi|67550085|ref|ZP_00427901.1|
RKLGIPCALDRFVQQAVLQVLQRQWDPTFSEASY-----GFR---PGRSAHQAVAKAQSYIQ---SGYR-WVVDLDLEKFFDRVNHDILMSRVARRVSDRRV----LKLIRSFLTAGVME---------HGLV----------------------------GATD-EG-TPQGGPLSPLLSNLMLDDLDREL------------------------GRRGLRFVRYADDCNVYV----R-SERAGQRVM----VGLKAFLTGKLKLKVNEAKSAVAR
>gi|92109307|ref|YP_571595.1|
RPLGIPTIRDRVVQAAAKIVLEPIFEAGFEDSAY-----GYR---PRRSAIDAVKETHRLLC---RGYT-DVVDADLSKYFDTIPHADLLRSVARRVLDRNV----LRLIKLWLQVPVEERDGDGKRHMSGG-----------------------------KSST-RG-TPQGGVASPLLSVIYMNRFLKHWRLT------------------GRGEVFHAHVISYADDFVIL-------SRGHAEEAL----TWTRAVMTK-LGLTLNEAKTSVKN
>gi|116622418|ref|YP_824574.1|
RKLGIPTVLDRFIQQAVMQVLQRRWDRTFSDYSY-----GFR---PGRSAQQAVAQAQQYIA---EGHG-WCVDLDLEKFFDRVNHDKLMGQIAKRIADKRL----LKLIRAFLNAGVME---------NGLV----------------------------SPSV-EG-TPQGGPLSPLLSNLVLDEFDREL------------------------ERRGHRFVRYADDCNIYV----R-SERAGQRVM----ESITQFITQKLKLKVNETKSAVAR
>gi|4586216|emb|CAA72334.3|
RVLGVPTVSDRIAQMVVKQMIEPDLDSLFLPDSY-----GYR---PGKSALDAVGVTRQRCW----KYD-WVLEFDIKGLFDNLPHDLLLKAVRKDVKCNWA----LLYIERWLTAPMEK---------NGEV----------------------------IERS-RG-TPQGGVVSPILANLFLHYAFDLW---------------------MTRTHPDLPWCRYADDGLVHC----Q-SEQQAEALR----VELSSRLAA-CGLQMHPTKTKIVY
>gi|54399801|gb|AAV34200.1|
RMLGIPAVIDRVIQQAIAQVISPYFEPQFSPHSY-----GYR---PHKRASQAVNHVQSCVK---QGYK-TAVDIDLSKFFDEVDHDMLMNRVSRKIKDKAL----MRLLGKYLRAGIAE-------RETGLW----------------------------FEST-KG-VPQGGPLSPLLSNILLDELDKKL------------------------TYKHLKFARYADDIIILV----K-TKSEGLIIQ----REITAFITKRLKLKVNESKSRVGP
>gi|16264581|ref|NP_437373.1|
RELGIPTVTDRLIQQALLQVLQPLLDPAFSEHSH-----GFR---PGRSAHDAVLEAQSYVQ---SGRR-IVVDVDLEKFFDRVNHDILIDRLSKRISDRRV----IRLIRAYLNSGIMD---------HGVV----------------------------QERV-MG-TPQGGPLSPLLANVLLDEVDKEL------------------------ERRGHCFVRYADDCNVYV----G-SRKAGERVM----ALLRRLYGR-LHLTINEGKSAVTS
>gi|86740895|ref|YP_481295.1|
RPLSIPAVRDRVVQTAVKIVLEPVFEADMAGCSF-----GFR---PRRSAHDALQVLVDACG---KGRR-WVVETDIADCFTAIPFEGLMQTIKERVCDQAM----LRLVRAVLRAGVMR---------DGEV----------------------------RRPV-SG-MSQGGPLSPLLCNVYLNRLDREW------------------------DDGDGMMVRFADDIVVMC----W-SEDQAVRAM----DCLVRLLAD-LGLETKAAKTRIVH
>gi|71849054|gb|AAZ48550.1|
RPLGISTLHDRVCMTAAMLVLEPIFEADLPDEQY-----AYR---PGRNAQQAAEEVKNRLY---LGQT-DVVDADLSDYFGSIPHSELMKSLARRIVDRRV----LHLIKMWLECAVEETDQRGRKKRTTEA----------------------------KDQG-RG-IPQGSPISPLLSNLYMRRFVLAWKKL------------------GLERSLGSRIVTYADDLVILC------KCGKAEEAL----QWMRTIMGK-LKLTVNEEKTRICQ
>gi|27377026|ref|NP_768555.1|
RPLAIAALEDKIVQGATVIVLNAIYEGDFCGFSY-----GFR---PGRGPHDALDALCTAIE--TRQVN-WIIDADIQNFFGAVSQPWLVRFLEHRIGDKRI----IRLIQKWLKAGILE---------DGVV----------------------------TADD-RG-TGQGSVISPLLGNIYLHYALDLWAKRWR----------------QREVSGGMIIVRYADDVVVGF----E-REDDARRFL----DAMRARLEE-FELTLHPAKTRLIE
>gi|77685027|ref|ZP_00800440.1|
RVLGVPSIDDRIAQNVMVSELNPKVEPIFYEDSY-----GYR---ENKSAIDAIEVTRKRCW----EYD-WLIEFDIVGLFDNINHDLLMKAVKQHTNEKWV----ILYIERTLKVPMVM--------SDGIH----------------------------VERT-KG-TPQGGVISAVLANLFMHYAFDHW---------------------MTRKHSNNPWVRYADDGLIHS----H-SLKEAEVLL----LKLGERFKD-CHLEIHPNKTKIIY
>gi|37677204|ref|NP_937600.1|
RQLAIPTVADRIIHTAIAQKLVAKFEPEFEHISY-----GYR---PNRSYTHAIRHIEQLRN---QGYL-YVLDADIKGYFDHICHKRLKQILQKYLEDNWV----ESIMTLLLSQQMPA---------QTLL--------------------------FGVELG-RG-IPQGSPLSPLLANLYLDGFDEAL------------------------LDRGEQIVRYADDFVVLV----T-HEQQAQHCL----AFVTQYLAS-LKLQLNTEKTRVVS
>gi|19917704|gb|AAM07000.1|
RPLSIPTMYDRAMQTLHSLVLGPIESAIGDKTSF-----GFK---PYRSTKDAYAYLHICLS-KKIAPE-WIVEGDIKACFDEINHTWILDNI------PMD----KRILKEFLKAGYVE---------NYHL----------------------------FPTE-KG-TPQGSPISPIIGNMALNGLENALAMRFYSRSDGTIDK-------SHQNRHKVNCARFADDFVATA----D-SPETALEII----DVIQEFLDP-RGLKLSEEKTLVTN
>gi|15147718|emb|CAC50819.1|
RPLGIPNMIDRALQALVLSCLDPIVEENSDSCSY-----GFR---KYRSTNDAIQRIRFILD-KAGAPR-YIWDADISKCFDNISHTFLNKVVRENLC-RKG----CELVEAWLKAPIIE---------KGSK----------------------------SYPS-RG-TPQGGVLSPLLCNMTLNGLENVIRDGLPSSSST-----------AGRKLKGRWVVRYADDFIITN----PIGKSQFIDNDI---PLINKFMAD-RGLEISEKKSRIID
>gi|68232157|ref|ZP_00571311.1|
RTLGIPNVVDRVAQTVLKLALEPKVEPVFHRDSY-----GYR---PGRSQRQALEVCRKRCW----SHD-WVVDLDVRKFFDTVPWEKLLKAVAYHTDQKWV----LMYVERCLKAPTKH--------ADGTL----------------------------QERT-MG-TVQGGPFSPLAANIYLHWGLDAW---------------------MAREFPTVPFERWADDVVFHC----V-SLEQAREVR----DAVVARLVE-VGLEAHPDKTRIVY
>gi|132208|sp|P19593|RDPO_SCEOB
RPLSIPSYTDRCLQALYKLAIEPMAEEVADLSSY-----GFR---PMRNVSWAVGRVLNGLNNPLANYQ-YVVEIDIKGCVDNINHQFISQVTPFIP---------KKILWAWLKCGYIE-------RNSNTL----------------------------QPTT-TG-VPQGGIISPLIMNLTLDGLEFHIYKKIQK---------------SSSQSKGNTYCRYADDMVILT----T-TEETALIAL----PAVKEFLAV-RGLEVKLAKTTIKN
>gi|27383306|ref|NP_774835.1|
RPLSIPTVKDRTVMTAAMLVIGAIFEADLLENQY-----GFR---PKVDAKMAVRRVFWHIR--DHRRS-EIVDADLRDYFTSIPHAPLMKCLTRRIADGRL----LSMIKGWLTVAVIEKDGR-RITRTAEA----------------------------RTKK-RG-TPQGSPLSPLLANLYFRRFLLAWRKH------------------GHQDQLDAHIVNYADDFVICC------RPGSSETAM----ARMQTLMNR-LGLEVNDTKTRLAR
>gi|17228961|ref|NP_485509.1|
RLIGIHTVRDRIIQRLLLDELYFPLEDTFLDCSY-----AYR---PGHSIQQAVQHLYGYYQ---YQPK-WIIKADVADFFDNLSWALLLTYLEELSLEPSL----LQLLEQQLKSGIII---------AGQY----------------------------RNFG-KG-VLQGGILSGALANLYLTSFDRKC------------------------LSQGINLVRYGDDFVIAC----N-SWLEANRIL----DKITGWLGE-VYLTLQPEKTQIFT
>gi|91201518|emb|CAJ74578.1|
RALCIPSVRDRIVQAAVLQLIEPVLEKEFEECSF-----AYR---KGRSVKQAVYKVREYYE---QGYQ-WVVDADIDAFFDSVDYSLLLLKFKCYIHDPCI----QNLVGLWLKGEVW----------DGKT----------------------------VTTLKKG-IPQGSPISPILANLYLDEFDEEL------------------------TRNGYKLVRFSDDFIILC----K-NSGMAKESL----KLTKKILEK-LLLELDEEQ--VIN
>gi|68548733|ref|ZP_00588202.1|
RTLLIPTVMERVAQTAAAIVLTPLVESELGANTF-----AYR---PGLSRMTAAREIERLRN---LGYN-WVVDADISSFFDTVDHPLLFQRFRELCDDEEL----LTLIARWLTAEIVD---------GQNP----------------------------KVKNTIG-LPQGCPISPMLANLYLDKFDERM------------------------EQEGFKLVRFADDFLILC----K-SKPKAEAAL----QLSESALAE-LKLQLNNEKTRITT
>gi|91176244|ref|YP_537115.1|
KLLNITTLYVIGLQHLINLVLEPLVEKTGELHSF-----GFR---PNKSAKNALGYLNSNLL--KQDSR-WILNTEIKGFFDKINQKWILNNLFLH---PDL----IKFIKSWFNSGRID---------KEVF----------------------------FETE-MGISP-GGVLSPTLVNFTLNGLENLLMNSLIPLTNIKQQQLFNY---SSQFTSNLVYIRYLDNLVILI----R-SKYIFNIYVK---PILNKFLEL-RGLSLCQEKSKLFK
>gi|1084279|pir||S51490
KSLGISTIRYRAMQYLIKYALDPVYEALASDSSY-----DFR---PTYSTWEVQDKIFQNLKSSSKGYKKSILKLHIENCQNKVDHKKLLFFI---LLPGTA----KKFIRSSLKYGILH---------ENDK----------------------------SLIR----MPQESILSALLCNIALHGMENLNNECAYR---------------SERQQKGLKGLRYANNMLYIV----D-EKENWKVLQ----KKIDRFQFS-RGLRISKVKTTFSS
>gi|113478103|ref|YP_724164.1|
KPM-ISTVKDQPLQILVKMSLENQWEAKFELSSY-----GFK---LPKSCQDAMKAIVNCVK---FHPK-YLLKADISQCFKCFDHEQLLKKLDTY---PTL----RKQIRVWLKDGLIN---------GKDL------------------------------------FKWEEVISPLLANIAFHDTEEKIKHYTKA---------------LSDQCEGLSLIRYGGNLVIAH----K-NIEVVQKCQ----YIIRECLSD-LCLELKPSQIIIYH
>gi|89893427|ref|YP_516914.1|
RELCYSAHIDRYIFQYYGYKLNQLYNERVVNDGINDSVIAYRDNLKKSNIHFAKKAIDFIRD---TKSC-FIVVGDFTNFFDNLDHKYLKKMLKELIGGLPE--DYYAVFKNITRYSTWDMEHILKLNGLPNNKKGIQELNQKDLALTLSQFKKYKSKYQKPNTKGYG-IPQGSAISAVLSNIYMLYFDNMINDYV--------------------KKHNGLYMRYSDDFIIIL--PEN-NKSLFVEQY----GFLVKTINSVDRLNLQPDKTQVFQ
>gi|110799504|ref|YP_695460.1|
RNIFYSSHVDGYIYQYYGQLVNEYYDKKSIELGINKVATAYRNNLRGKCNIHFAKEVFEFIC--KCNNA-FIYVSDFKGFFDNLDHNYLKEKLEYVLNVSKLPIDQYVIYKNITKYTYIELSDIKSVKDKNDNK-----VNAKAKYFNTQEFRSFKKNNLKKNKEEYG-IPQGASISSVYSNIYMIDFDKKVNDYV--------------------TSNKGLYRRYCDDLIIII--PIR-DDEEFNNECIEYGNKIESIVQDTPRLELSPEKTEKFI
>gi|114847552|ref|ZP_01457859.1|
RPISYAAHTDSHIYSYYATLLQPIYEKFIEKHGLGTNITGFR-KLDGECNIDFAHRAFNAIR--SMTPC-IALSFDVKSFFDEIDHSILKQAWCTILEKTLLPEDHFAIFKSLTTYSYVD--RDDAFNAFGITKSSKKNGIRRICNPLEFRSILRPAGLIKRNKNSYG-IPQGSPISGLLSNIYLFEFDKAIS--------------------YFASDTKSHYYRYCDDIIIIC------NEEHEELFK----NLVSDELKK-LNLRTNEKNVIRKF

#RT_like_1: A subfamily of RTs
>gi|46099807|gb|EAK85040.1|
IKQQLLRMITAEQLIQCDLYGHFTILQSDFRWFGPSLSHTTILTVLKFFGMPRKWLDLFAKFLSPSISFAADGAQA--Q-RRVRTCGMPIAHQLSALFGETVLFALDFTINQATEGGYLYRIHDDLWFWGRQE-QCAVAWKTLQEFSAATGLQLNMDKTAACTLQSTT-ASPLFDEDRQELPAPSKVDTTSTSDAILPWNPIRWGFLVL
>gi|83771580|dbj|BAE61711.1|
AKQNLLHLLATDILIKTQLEGELTCFRSKYDSLNPDLSHATIHAVLGFFGVSEKWLGFFQRFLKAPLKFIDDPHAE----PRQRQRGTPGAHVLSDVFGESILFCLDFMINQKTEGELLWRVHDDFWFWSSNHQTCVTAWNAIQRFNKTMGISLDPLKTGTAQVQHKA-TKSP---------------T--SLDPALPPGQVRWGMLYL
>gi|40746281|gb|EAA65437.1|
TKHSLLHLLITESILHTNLHGQFTAIRSDFKWFGPSLPHTTMLTVLSYFGVPQQWLEFFRTFLEAPMKFVHDGPNA--T-VLRRKRGIPMSHTLSTAMGEAVLFCMDYAVNQSTDGAYLYRLHDDFWFWGQER-TCVKAWTAMTVFAEVMGLEFNEEKTGTVRWQGAG-EKLP------QILTPPPVQP--EGEDLLPSGNIRWGFLKL
>gi|90306364|gb|EAS35995.1|
VKQLLLRTLATEVLMGRAFDGEVAVVQSDFLWFATSVSHNTIFAVLRFVGFEEEWINFFKNFLEPPLDMLTGDQ------IRIRKRGLPMAHIFEKVFGELILFFMDVAVSQQA-NILLYRFHDDLWLCGKPD-SCAKAWLTMENFAKIMGLEFNKSKTGSVYLVEEGRTKKP------------------EVVKVLPEGPVAINFLVL
>gi|90300817|gb|EAS30448.1|
LKHSLLHLVMAEIWLNKALYGDVTIVQSDFRWFGPSLPHTTLLSVLKFFHVPQVWLDFFKRFLEAPLRFVQNGDSG--P-VRIRKNGAPLSHTISDWLGETLLFCLDFSVNQHADGLLLYRLHDDFWFWGQEQ-TCAKAWKAVNEFCTVMGLEINDEKSGTARLHGGK-RRFSGDTEGEPEQSPSTIST--DLPATLPNGDIRWGFLKL
>gi|83764444|dbj|BAE54588.1|
IKQQLLRKVASQVLLERQIYGQAVVVQSDMKWYATALPHSTILAVMKFFGFPDEWLAFFRKYLAAPLNLDHSAEGRMQTGPRIRRRGVPISHAMEKLTGELVLFPMDLAVNRET-GLLLYRIHDDLWVCGKPE-KCARAWEVMQDYAKVTGLEFNRGKTGSVYLTD---TPDP------------------QITARLPTGQVTFGFLTL
>gi|88183034|gb|EAQ90502.1|
VVQELLQRLQAEIIMQTKLGKDVTVIRSDFKWFGPSIPHSTIYAVLEFFGVQSEWIDFFRRVLEAEIRFKQDSPDA--P-VQIRKRGTPMSTPITDLFGESILFCLDYAVNQKAAGTRLYRLHDDMWLWGNSG-TCADAWKVITQFTDTMGLELNSEKTGSVQVKSDN-GTAA--------------ST--TSSGTLPEGDVKWGFLKL
>gi|42553607|gb|EAA76450.1|
LKQTLLHLLSSEITVNTHLYGEMTAFQSVFEDWNPRLPHDTVLEILKYFGVSDTWLSFFKKFLEAPLKFVDEDDSA----TRKRRRGTPASHVLSDVFGETTLFCLDFSVNQST-SSNLWRMHDNFWFWSNDHKVAVKAWETVDEFITVTGVDINPAKSGSVRISKDS-NMEL------------------TIDESLPAGDIRWGFLRL
>gi|28629058|gb|AAO49461.1|
AKQDLLHLVATEIIINKRLHGELTCFRTVFHSWNPVLPHDTIRTVLDFFGVSEKWQKFFVKFLQAPLKFADDQSP-----PRLRRRGAPGSHSLSDVLGEVVMFSLDYKINQATDGGLLHRLYDDLWFWSRDYEKCMKAWASIEEFANLAGVELDGKKTGSVRISQ---DPDV------------------KVDSRLPEGEIRWGFLYL
>gi|39951443|ref|XP_363438.1|
LKQSLLHIFSTDIAIETATKGEISAFHSVLKDWNPLLPHETILAVLKFLGVSSKWLDFFSSFLRAPLRFVGDDPSS--TEPRVRRRGTPASHQLSDVFGESVLFCLDFSVNQATDGEPLWRIKDDIWFWSSNSVTTVKAWKAVSDFAKVTGTSVKDEKSGSARISNVS-FREG------------GKSR--PVDPSLPQGDLRWGFLRL
>gi|115437090|ref|XP_001217723.1|
IKQQLLRKIATETLIQRQVNGRAAVVQSDLQWYATALPHSTIFAVVKYLGFPEKWIRFFEKYLKTPLNLIRSFEDS-QSGPRIRHRGVPMSHASEKFLGELVLFFMDVTVNRKT-GMLLYRMHDDLWFCGEPE-QCVKTWEVLQKYARITGLDFNYSKTGSVYLAD---IVDE------------------AVVSKLPQGPVKFGFLIL
>gi|111071397|gb|EAT92517.1|
TKQTMLRLLTTEILLNTKVYGECSVLQSDFKWFGPSLPHDTIFAVLEFFGVPAKWLRFFKRFLEVPVVFAQDGAGA--K-ARVRKCGIPNSHILSDALGEAVLFCLDFAVNRRTKGANIHRFHDDLWFWGQET-TSVQAWEAIKEFTEVMGLQLNEEKTGSSIIVADK-SRAR------------------VPHPNLPEGNLHWGFLEL
>gi|111056487|gb|EAT77607.1|
LRQAFLQQLATNVIIRRELHGEVAVVQSDLQWYATGLPHSTLWAVLRFWGIPDDFIALFKKYAEAPLRMTATPGEN----VRTRRRGIPITDAFETLFGEIVLFCMDVAVNRLS-GMTMTRFHDDLYLYGAPK-QTSEAWKTIEMFVKVLGLDINTSKTGSVYISDG--TKDD------------------AIAATFPEGPVGMGMLQL

#RNA_dep_RNAP: RNA-dependent RNA polymerase (RdRp)
>gi|18655895|pdb|1KHV|A
RLLWGCDVGVAVCAAAVFHNICYKLKMVAR-FGPIAVG-VDMTSRD-----VDVIINNL-TSKASDFLCLDYSKWDSTMSPCVVRLAIDILADCCEQ--TE--LTKS---------VVLTLKSHPMTILDA----MIVQTKRGLPSGMPFTSVINSICHWLLWSAAVYKSCAEIG------LHCSNLYEDAPFYTYGDDGVYAMTPMM----VSLLPAIIENL----RDYGLSPTAADKT-EFIDVCP----LNKISFLKRTF---E-LTDI--GWV-----SKLDKSSI
>gi|47169137|pdb|1SH0|A
RLLWGSDLATMIRCARAFGGLMDELKTHCV-TLPIRVG-MNMNEDG------PIIFERH--SRYRYHYDADYSRWDSTQQRAVLAAALEIMVKFSSE--PH--LAQV---------VAEDLLSPSVVDVGD----FTISINEGLPSGVPCTSQWNSIAHWLLTLCALSEVTN---------LSPDIIQANSLFSFYGDDEIVSTDIKL----DPEKLTAKL------KEYGLKPTRPDKT-EGPLVISED--LNGLTFLRRTV---T-RDPA--GWF-----GKLEQSSI
>gi|18655897|pdb|1KHW|A
RLLWGCDVGVAVCAAAVFHNICYKLKMVAR-FGPIAVG-VDMTSRD-----VDVIINNL-TSKASDFLCLDYSKWDSTMSPCVVRLAIDILADCCEQ--TE--LTKS---------VVLTLKSHPMTILDA----MIVQTKRGLPSGMPFTSVINSICHWLLWSAAVYKSCAEIG------LHCSNLYEDAPFYTYGDDGVYAMTPMM----VSLLPAIIENL----RDYGLSPTAADKT-EFIDVCP----LNKISFLKRTF---E-LTDI--GWV-----SKLDKSSI
>gi|130472|sp|P26580|POLG_HPAV2
RAIDACPLDYTILCRMYWGPAISYFHLNPGFHTGVAIG-IDPDKQ------WDELFKTM-IRFGDVGLDLDFSAFDASLSPFMIREAGRIMSELSGT--PS--HFGT---------ALINTIIYSKHLLYN----CCYHVCGSMPSGSPCTALLNSIINNVNLYYVFSKIFG---------KSPVFFCQALKILCYGDDVLIVFSRDVQIDNLDLIGQKIVDEF---KKLGMTATSADKN-VPQLKP-----VSELTFLKRSF---N-LVED--RIR-----PAISEKTI
>gi|2507210
RVIQPRDPRYNVEVGRFLRHSEEMLFKAINKTFGGRTI-FKGLSSDQAGEEFKTLWDSF---KDPVGIGMDASRFDQHISKDALEFEHKMWLSMFPK--SERAELAR---------LLSWQINNRGLARCPDG-EIRYRVEGCRMSGDMNTSSGNCYIMCATVHNWCDNI---------------KHIKHFRLANNGDDCMLVVERSD----EKKVRNGLIEYY---ATLGFTMKVEPTV-DV---------LERLEFCQTRP---V-LVDG--KYR-----MVRNLHQS
>gi|1685121
RVIQPRSPRYNLQVARYLKKTEHHIYRGLDKIWGGPCV-MKGYNVEEVASHIIGAWEQF---QKPVAIGFDMSRFDQHVSVPALQFEHSIYQAIFKG--DR--ELQQ---------LLSWQLRNYGTGFAHDG-LIRYKVDGCRMSGDMNTALGNCILACLITKHICRGL-------------------DARLINNGDDCVLICETRD----VGRVVDKLTTAW---LHFGFTCIAEEPV-YE---------PEKIRFCQMAP---V-YDGE--KWV-----MVRDPKVS
>gi|1040741
RVISPRDPKYNLALGRYLRPMEERIFKALGKLFGHRTV-MKGMDTDVTARVIQEKWNMF---NKPVAIGLDASRFDQHVSLEALEFEHSVYLKCVRRMVDKR-KLGN---------ILRHQLLNKCYGNTPDG-AVSYTIEGTRMSGDMNTSLGNCVLMCMMIH-----------------AYGLHKSVNIQLANNGDDCVVFLEQSD----LATFSEGLFEWF---LEMGFNMAIEEPS-YE---------LEHIEFCQCRP---V-FDGV--KYT-----MCRNPRTA
>gi|133643
RTIQPRSKRYNLAIGQYLRLNEKKMLDSIDDVFKEKTV-LSGLDNRAQGRAIAHKWRKY---QNPIGIGLDASRFDQHCSVDALKFEQTFYKACFPG--DQ--QLET---------LLKWQLSNTGSALLPTGELVRYRTKGCRMSGDINTGLGNKILMCSMVHAFLKET-----------------GVRASLANNGDDCVLFCEKGD----YEQINRNLEQWF---LCRGFEMTVEKPV-DV---------LEKVAFCRSQP---V-CIAT--QWA-----MVRQLGSL
>gi|133660
RVIQPRSPRYNVCLGRYLRHYEHHAFKTIAKCFGEITV-FKGFTLEQQGEIMRSKWNKY---VNPVAVGLDASRFDQHVSVEALEYEHEFYLRDYPN--DK--QLKW---------LLKQQLCNVGTAFASDG-IIKYKKKGCRMSGDMNTSLGNCILMCAMVY-----------------GLKEHLNINLSLANNGDDCVIVCEKAD----LKKLTSSIEPYF---KQFGFKMEVEKPV-DI---------FERIEFCQTQP---V-FDGS--QYI-----MVRKPSVV
>gi|5921572
RVIQPRNPRYNVELGRYLRHMESKLMKAVDGVFGETTC-IKGYTADEVGAIFREKWDRF---DKPVAIGLDASRFDQHCSMEALQYEHSFYRAMYPG--NK--LLSK---------LLEWQLHNKGKGYVPDG-TITYRKEGCRMSGDINTSLGNYLLMCAMVHGYMRHL----------------GINEFSLANCGDDCVLIVERRN----LKQVQRTLPEYF---LNLGYTMKVEAPV-FQ---------MEEVEFCQAHP---V-QFQG--GWK-----MVRNVRTA
>gi|2213432
RIIQPRAPRYNVELGVYLRPFEHKAFRAVERVFGSPTI-MKGYTAEEQASIAREKWDRF---SKPVAIGLDASRFDQHVSVAALKWEHKLYHHAFNH--DK--TLKK---------LLKWQIHNEGTAFASDG-CIKYKKTGCRMSGDMNTSLGNCLIMCGMVYDLLVTH-----------------DIDAELLNNGDDCVLICERSE----EAHLLEVIPQYF---RQYGFTMEVEKPV-HI---------FEKLEFCQTQP---V-YVDG--KWI-----MVRKPNPA
>gi|332142
RVIQPRNVRYNVEVGRYLRRFEHYLYRGIDEIWNGPTI-IKGYTVEQIGKIARDAWDSF---VSPVAIGFDMKRFDQHVSSDALKWEHSVYLDAFCH--DS--YLAE---------LLKWQLVNKGVGYASDG-MIKYKVDGCRMSGDMNTAMGNCLIACAITHDFFRSR-----------------GIRARLMNNGDDCVVICEKEC----AAVVKADMVRHW---RQFGFQCELECDA-EI---------FEQIEFCQMRP---V-YDGE--KYV-----MVRNPLVS
>gi|436018
RLICPRNKRYNVELGRRLKFNEKKFMHAIDSTFDSPTV-LSGYDSFRVGKIIANKWSKF---KRPVAIGVDASRFDQHVGVEALQWEHSIYNGAFK---DP--ILKE---------LLHWQTENRIMLFVEDK-ILKFKVKGHRMSGDINTSSGNKLIMCGMMHYYFKTL-----------------GVKAELCNNGDDCVIICERKD----ENKF-QHMHSWF---KDYGFDMQIETPV-YK---------IGQIEFCQSKP---V-KING--YYR-----MVRKPESI
>gi|4210474|dbj|BAA74537.1|
RIFEILPFQINIIIRRYFMFWMQLLMAAHD-QLPSKVG-LNVYSES-----WDILLGRH--TRLANHFTGDYSGFDTSTPRILVYAIVDKINELAGD--SE--MNQR---TRR---NIIRFVLNRYLISDG----YVYEIHGGTPSGFAPTVMINSIVNEFYLKWSWMGLMKEAGYAKE--ASLYAFHEATEISLYGDDNFVSVATPV----ASLYNLKTISEFL--RRIGVKLGDGAKT-GITKPFIP---LEEVDFLKRQF---V-ADAGSTAIL-----CPLKKISI
>gi|13111602|gb|AAK12396.1|
RVIDVAGFGHAIVGRMLFGRLFAFFHKNPGWNTGSAVG-VNPDLA------WTQIFYTA---PSRNVLAMDYSGFDASHTSGMFCILKHFLTTLGYG------TLQL---------SYIDSLCYSKHHWDD----ETYRLDGGLPSGCSGTTIFNTIMNNIVARAAASYA----------------AEGPVGILCYGDDILVSSPEKF----------SVSDWLEFYSKTPYKVTAADKS-EHIDWRD----ITQCTFLKRGF---V-LDGS--LVR-----PVMEEQHL
>gi|25057979|ref|NP_740257.1|
RVVEAAPVHAIVAGRMLLGGLIEYMQAYPG-RHGSAVG-CNPDLH------WSKFFFKF--AKFDQVYDLDYKCFDATLPSCAFRIVEDYLVKLTGD------ERVR---------AYVETIRHSKHVYGS----QTYEMIGGNPSGCVGTSIINTIINNICVLSALIQ-------------HPDFSPDNYRILAYGDDVIYGCDPPI----HPRYIKEFYD-----KHTPLVVTPANKG-SDFPDSST---LYDVTFLKRWF---V-PDDQRPFYIH----PVMDPDTY
>gi|18766569|gb|AAL79021.1|
RVFCNPPIDYIVSMRQYYMHFVAAFMEQRF-KLMHAVG-INVQSTE-----WTLLASKL-LAKGNNICTIDYSNFGPGFNAQIAKAAMELMVRWTMEHVEGVNEIEAY--------TLLHECLNSVHLVSN----TLYQQKCGSPSGAPITVVINTLVNILYIFVAWETLVGSKERG----QTWESFKQNVELFCYGDDLIMSVTDKY----KDIFNALTISQFL--AQYGIVATDANKG-EEVEAYTT---LLNSTFLKHGF---RPHEVYPHLWQ-----SALAWSSI
>gi|6226677|sp|P27407|POLN_FCVC6
RMIWGCDVGVATVCAAAFKGVSDAITANHQ-YGPIQVG-INMDSPS-----VEALFQRI--KSARKVFAVDYSKWDSTQSPRVSAASIDILRYFSDR--TP--IVDS---------ATNTLKSPPIAVFNG----VAVKVSSGLPSGMPLTSVINSLNHCLYVGCAILQSLEARNV-----PVTWNLFSTFDMMTYGDDGVYMFPTMY----ASISDQIFANL----SAYGLKPTRVDKS-VGSIEPID---PNSVVFLKRTI---T-RTPQ--GIR-----GLLDRSSI
>gi|38224698|gb|AAR14150.1|
RTFTILPPEINILFRQYFGDFAAMVMTCRA-KLFCQVG-INPESME-----WGDLMLGL-KEKSTKGFAGDYSKFDGIGDPQIYHSITQVVNNWYND--GE--ENAT---IRH---ALISSIIHRRGIVKE----YLFQYCQGMPSGFAMTVIFNSFMNYYYLSLAWMNLISASPLSPQ--ASLRYFDEYCKVIVYGDDNIVAVNEEF----LEYYNLRLVAGYL--SQFGVSYTDDAKN-PIEKSERYVK-IEDVTFLKRRW---V--SLG--GRASMLYKAPLDKVSI
>gi|2493476|sp|Q69014|POLN_MANCV
RLLWGCDAATTLIATAAFKAVATRLQVVTP-MTPVAVG-INMDSVQ-----MQVMNDSL---KGGVLYCLDYSKWDSTQNPAVTAASLAILERFAEP--HP--IVSC---------AIEALSSPAEGYVND----IKFVTRGGLPSGMPFTSVVNSINHMIYVAAAILQAYESHNV-----PYTGNVFQVETIHTYGDDCMYSVCPAT----ASIFHTVLANL----TSYGLKPTAADKS-DAIKP------TNTPVFLKRTF---T-QTPH--GIR-----ALLDITSI
>gi|31580557|ref|NP_853540.1|
RMILCTDPVFTRIGAAFEQHQNSLMKLETE-NHHAQVG-WSPFFGG-----IHRRATRL-YGEHRYYVELDWTRFDGTIPPELFRRI--KLMRFFLL--DP--KYKT-PENRDRYNWYVENLIDKVVLLPT---GEVCKIYGGNPSGQFSTTVDNNFVNVWLTVFELAYLFYKEHNRL---PTICEIKKHTDWICYGDDRLLAVDKRF----INSYDTAAVIAMYK-DVFGMWVKPDNIK-VFPS-------LEGVSFCGMVW---T-KRKG--QYV-----GKPNVDKI
>gi|2668620|gb|AAC58718.1|
RLFNNVDPAVNAILKIMFGDWFSRAMAKSS-EGYYAIG-QNPYTTS------TEIWHRF-STKQGKILNTDFKAFDKLLITELIEAFCYIGGELTKNEKHP--QSALMYE------AISLTLIHAVHILNG----SVYVVNNGNESGTFVTTLLNCVSVHIIFNYSFIVCWNKVPSYVHIKPLLKDIMSRSELAILGDDKTQVVSKDI-----PMEEEDLIDIA---ASLGMECTKAKGG-LDD--------GKQINFCSRVL---V-WDEVEQIVY-----PRLKKSSI
>gi|2344757|dbj|BAA21898.1|
RLFSASPLPYLILCRMYLQGGVSRLIRGKI-VNNIAVG-TNPYSDD-----WTRVAHHL--LRNRHFVAGDFASYDSSQEKEILRAACEVIVELCEDLSLPQSERDKHRRVRW---VLLESLLNSVHYSYG----KLYYWSKSLPSGHFLTSIINSIFVNIAMCYAFVESQEKGNRSE---ENIRVFFNDFSIVTYGDDHVIGVPEKY----VEDFNQLTLPKLL--KTLGLDYTMEDKD-RICDIKS--RKLEEVTFIKRSF---R-YVKELDRWL-----APLDLNSI
>gi|25013881|ref|NP_734292.1|
RVFTGAPIDTLLAGKILVDNFNNYFYKCHL-QGPWTVG-INKFNRG-----WNKLANYF--NHDWVFIDCDGSRFDSSIPPIMFNAVCMLRSVFGDL--DP--DENQ--TLSN---LYTEIVNTPILTIEG----NIIRKFRGNNSGQPSTVVDNTLILMIAMEYAIAKV--------------FVTRPDIKYVCNGDDLLINCPRST----ANAISEHFKDVF---ADLSLNYDFDHVC-DK---------ITDVDFMSHSF---M-WLDTEQMYI-----PKLDKERI
>gi|40538720|gb|AAN09930.2|
RAIKACPVSFTILFRKYLGYALAQIQSHPGFHTGIAVG-VDPDQD------WHCMWYSI-VTQCDLVVGLDFSNYDASLSPFMIYHAGRVLGQICGL--DP--RLVD---------RIMEPIVNSVHQLGS----MRYYVDGSMPSGTPATSVLNSIINVVNISHVLCALEK---------ISVFEVFKLSKILTYGDDVLFCIKKES----LDQKSFPLSSFVQGLKELGMSPTGADKM-EVKVTP-----VHKMSFLKRTF---Y-VD----EWSICH--PRISEETV
>gi|130392|sp|P29149|POL1_GFLV
RLFSVLPLAYNLLLRVKFLSFSRLLMKKRG-HLPCQVG-INPYSRE-----WTDLYHRL-GELSDVGYNCDYKAFDGLITEQILSTIADMINAGYRDPVGN--RQRK---------NLLLAICGRLSICGN----QVYATEAGIPSGCALTVVLNSIFKELLMRYCFKKIVPP--------VYKECFDRCVVLITYGDDNVFTVAQSV----MQYFTGDALKMQM--AKLGVTITDGKDK-SLS-TIPA-RPLLELEFLKRGF---V-RSSG--GMIN----APLEKLSI
>gi|50403733|sp|P29150|POL1_TORVR
RTFVVLPMHYNLLLRKYVGILCSSMQVNRH-RLACAVG-TNPYSRD-----WTDIYQRL-AEKNSVALNCDYSRFDGLLNYQAYVHIVNFINKLYND--EH--SIVRG--------NLLMAMYGRWSVCGQ----RVFEVRAGMPSGCALTVIINSLFNEMLIRYVYRITVPR--------PLVNNFKQEVCLIVYGDDNLISIKPDT----MKYFNGEQIKTIL--AKYKVTITDGSDK-NSP-VLRA-KPLKQLDFLKRGF---R-VESD--GRVL----APLDLQAI
>gi|130439|sp|P03304|POLG_EMCV
RIVDVPPFEHCILGRQLLGKFASKFQTQPGLELGSAIG-CDPDVH------WTAFGVAM--QGFERVYDVDYSNFDSTHSVAMFRLLAEEFFTPENG--FD--PLTR---------EYLESLAISTHAFEE----KRFLITGGLPSGCAATSMLNTIMNNIIIRAGLYLT------------YKNFEFDDVKVLSYGDDLLVATNYQL------DFDKVRASL----AKTGYKITPANTT-STFPLNST---LEDVVFLKRKF---K-KEGP--LYR-----PVMNREAL
>gi|15192762|gb|AAK91591.1|
RVVEVAAVDHVVAGRMLLGKFTAKMHANNGLGIGSAVG-CNPDVD------FTRFAYQI--LDWDYVYDIDYKNFDASHSPKVFQHLKKLLSPANG---FD--VRVQ---------NYIDSLCYSKHQFGE----TYYECEGALPSGCSATSILNCLMNNIVLRAAAYDV------------FTNYEEGDLAFLTYGDDVLLCANQPL---PLERFRKSL-------AKLGYTITPADKS-SFFPEVST---LADVVFLKRQF---K-PDEEFPFLFK----PVMDVRNL
>gi|264099
RVIQPRDPRSNIVLAKYIKPLEPMLYKALGKLYKYPAV-AKGFNAVETGEIIAGKWRCF---KDPVVVGLDASRFDQHVSVEALQFTHAVYRGFIK---SR--EFNN---------LLQMMYTNRGLGSAKDG-FVRYKVKGRRMSGDMDTSLGNCVLMVLLTRNLCKVL-----------GIPH------ELFNNGDDCIVFFDRCH----LEKFNNAVKTYF---ADLGFKMKVEPPV-DV---------LEKIEFCQTQP---I-YDGE--KWR-----TVRCISSI
>gi|6143720
RVIQPRDPRYNVEVGRYLKPLEPRLMKAIDKLWGEKTA-IKGYTVEKVGEILHQKSLRF---KNPCFVGLDASRFDQHCSRQALEWEHSVYNAIFR---DP--YLSE---------LLTWQIDNVGTAYLKDG-FVRYRVDGCRMSGDMNTSMGNYLIMSCLVYQFCKDI-----------------GIDASLANCGDDCVLYLEKED----LPKL-KALPDWF---GKMGYSMKVEKPV-FT---------VEEIEFCQQHP---V-QLSR--GYV-----MVRRPDVC
>gi|1572848
RFIVFPPLDFRIAEKMILGDPGIVAKSILGDAYLFQYT-PNQRVKA-----LVKAWEGK---LHPAAITVDATCFDSSIDEHDMQVEASVFAAASD---NP--SMVH---------ALCKYYSGGPMVSPD---GVPLGYRQCRSSGVLTTSSANSITCYIKVSAACRRV----------------GIKAPSFFIAGDDCLIIYENDG----TDPCPALKAAL----ANYGYRCEPTKHA-S----------LDTAECCSAYLAECV--AGGAKRWW-----LSTDMRKP
>gi|1944461
RLIVFPPLDFRIAEKLILGDPGRVAKAVLGGAYAFQYT-PNQRVRE-----MLKLWESK---KTPCAICVDATCFDSSITEEDVALETELYALASD---HP--DWVR---------ALGKYYASGTMVTPE---GVPVGERYCRSSGVLTTSASNCLTCYIKVKAACERV----------------GLKNVSLLIAGDDCLIICERPM----CDPSDALGRAL----ASYGYACEPSYHA-S----------LDTAPFCSTWL---A-ECNADGKRHFF---LTTDFRRP
>gi|765145
RLISYPHLEMRCVEKMYYGQVAPDVVKA---VMGDAYGFVDPRTR------VKRLLSMW--SPDAVGATCDTVCFDSTITPEDIMVETDIYSAAKLSDQHR--AGIH---------TIARQLYAGGPMIAYDGREIGYRR--CRSSGVYTTSSSNSLTCWLKVNAAAEQA----------------GMKNPRFLICGDDCTVIWKSAG----ADADKQAMRVFASWMKVMGAPQDCVPQP-KYS--------LEELTSCSSNVTSGI-TKSGKPYYF-----LTRDPRIP
>gi|1262768|emb|CAA65614.1|
RLIDVPPMPHVVVGRQLLGRFVAKFHEANGFETGSAIG-CDPDVD------WTRFGLEL--ERYRYVYACDYSRFDANHAADAMRVVLNYFFSEDHG--FD--PGVP---------AFIESLVDSVHAYEE----KRFNIYGGLPSGCSCTSILNTVLNNVYILAAMMKA------------FENFEPDDIQVICYGDDCLIASDLEI------DFQKLVPVF----SSFGQVITTADKT-DFFKLTT----LSEVTFLKRAF---V-PDGA--FYK-----PVMDVKTL
>gi|130391|sp|P13025|POL1_GCMV
RLFEIMPLHYNLLLRVKTCAFTAFLQHNRH-RLPCQVG-TNPYSRE-----WGHLLNRLRRVKTNEAINCDYSGFDGLLTPQLVEMMAKMINRLYLR--SG--ESEVMQAQRL---NMIMALCGRYALVGT----QVYKVNCGLPSGFALTVVMNSIFNEILIRYAYKTLAPT--------PEKNSFGINVCLLVYGDDNLISVSPAV----ASWFTGEAIRVTL--AEKRIKITDGSDK-DAP-TIEA-KPFSELDFLKRKF---YVHPEHGQVW------APLDKSAI
>gi|21309876|gb|AAM46079.1|
RCIEACSIDYVIAYRVVMSSLYEAIYQTPAQELGLAVG-MNPWTD------WDPMINVL----QPYNYGLDYSSYDGSLSEQLMRYGVEILAYCHE---QP--EAVM---------ILHEPVINSQHLVMD----EIWHVNGGMPSGAPCTTVLNSICNLLVCTYL---------------AYEQSLDIEVLPIVYGDDVIFSVSSPL----DAEYLVQSAA-----QNFGMEVTSSDKS-GPPKLLK----MDEIEFLKRTT---K-FFPGSTYKV-----GALSLDTM
>gi|50400782|sp|Q8V5E0|POL1_BRAV
RLFSILPLEFNLLLRKKFLHFSSSLQMHRD-TLPTQVG-VNPYSRE-----WGELLQRL-RAQSSVAINCDYASFDGLLTGQILEKIGTMINKMYIG--SE--ASKI---QRL---NLLMSIVNRKSICGA----RVYEVRAGIPSGCALTVLLNSIFNEFLIRFVWRTTIIG--------VPRERFSQYVTLLIYGDDNLIAVHPDY----LPHFNGEIIRTRL--ADVNVIITDGSDK-TAE-KIEE-KPLVQLDFLKRRF---R-KLND--GTVY----APLDLASV
>gi|20977018|gb|AAM33242.1|
RVIECSSLNDTIMMKQTFGRLFQVCHKNPGTYTGGWVG-CNPD-VD-----WSK--LRE-IG-DAYVCAFDYTNWDASLSPLWFDALKLFLSKLGYS------GRDL---------VLIAQLCYSNHIYKN----EGYKVAGGMPSGCSGTSVFNSIINNIVIRTLIMLV------------YKNINLDELLVLCYGDDLLVAYPYEL----DPNVLVPLA------KSYGLTITPADKS-TTFQTGTK---LTDVTFLKRGF---K-FDEE----YPFLCHPVFPMEEV
>gi|6174922|sp|Q66578|POLG_EC22H
RCIEACEVDYCIVYRMIMMEIYDKIYQTPCYYSGLAVG-INPYKD------WHFMINAL----NDYNYEMDYSQYDGSLSSMLLWEAVEVLAYCHD---SP--DLVM---------QLHKPVIDSDHVVFN----ERWLIHGGMPSGSPCTTVLNSLCNLMMCIYTTNLISPGI---------------DCLPIVYGDDVILSLDKEI----EPEKLQSIMA-----DSFGAEVTGSRKD-EPPSLKP----RMEVEFLKRKP---G-YFPESTFIV-----GKLDTENM
>gi|50400736|sp|Q6W8W4|POL1_RRVC
RLFSICPAWYNIVVRQHFVYIAESVRKRRR-TLSSQVG-IVVGSRE-----WDDLAARLRSKKNDKMYCCDYSKFDGLMTPQIVHAITNIYERMFSG--ND--GMSQ---FRQ---NLLMGICNRISICGS----QVYRVEAGMPSGFALTVDFNSIFNEILVRCAYRSLVPE--------IERPFFSNNVVLIVYGDDNVLGIHPNI----ESAFNGNAIKAYMK-EELGIKITDGADK-LSPVICA--RPLEQCEFLKRTW---R-KDRQYGLYR-----APLVETSI
>gi|138362|sp|P03600|VGNB_CPMV
RCFTILPMEYNLVVRRKFLNFVRFIMANRH-RLSCQVG-INPYSME-----WSRLAARM-KEKGNDVLCCDYSSFDGLLSKQVMDVIASMINELCGG--ED--QLKN---ARR---NLLMACCSRLAICKN----TVWRVECGIPSGFPMTVIVNSIFNEILIRYHYKKLMREQQAPE---LMVQSFDKLIGLVTYGDDNLISVNAVV----TPYFDGKKLKQSL--AQGGVTITDGKDK-TSL-ELPF-RRLEECDFLKRTF---V-QRSS-TIWD-----APEDKASL
>gi|21655151|gb|AAL99277.1|
RLIWGADARVALIASAALSPIANALKTVTN-LLPVQVG-VDPSSAS-----CVSAWVNR-LNRHDHCLELDYSKWDSTMSPVLINIAIDILCNTCAS--DG--LRVA---------VCQTLKTRPTALVEG----VAVPTKSGLPSGMPFTSQINSIVHWILWSATVRKCSLP--------LNIGSVNELAPFLTYGDDGLYTIPSHL----TKSIDEIVSTL----KGYGLSPTAPDKGMNIEIKKTSFTYMSGPVFLKRRI---V-LTPG--GHR-----ALLDLTSL
>gi|20451019|ref|NP_620560.1|
RMFSACPLDYLIACKMYFGGVVSLLQKSRN-ICGISVG-TNVYSYD-----WTIIANTL-LSKSPCMIAGDFEGFDSSQLQDILRAASQVLLNVSRDMLGS--TEEDLLVMQ----VLLESLLSSVHLNNN----YVYMWLKGLPSGHFLTAIINSIFVLISFNSVWQIAFGVNV------KKAFEFFEVCGIVAYGDDHIVSVPEWA----TNVFNQYELASLF--KQIGLSYTLEDKD-AT-VNAPY-RSLNEVSYLKRKF---L-WDEDKRQYL-----APLSLETI
>gi|3914379|sp|Q65730|POLG_BSTV1
RTFTSAPIDILFGAKAVVDDFNKQFYKRHL-LGPWTVG-INKFNKG-----WDLLARSL--MRYEWFIDADGSQFDSSITPLLMNAVLTIRLYFMER--DD--ITEL--MLRN---LYTQIISTCMLAEDG----LIVQKHRGNNSGQPSTVVDNTLCLMIAMEYARQRA-----------ISDGHLNMQMRYVCNGDDLLINANEEA----KDVVQGKYEQYI---KELELNYCFDDAF-QS---------IEGVEFMSHKF---M-LRNG--IYI-----PKLARHRI
>gi|20451022|ref|NP_620564.1|
RMFSNGPIDYLVWSKMYFNPIVAVLSELKN-VDHISVG-SNVYSTD-----WDVIARYL-KSKSHHMVAGDFEGFDASEQSDILYAAGEVLQELSKKIFNS--TEDEMLQQR----AIIHSLVNSLHINEN---GIVLQWCKSLPSGHYLTAIINSVFVNLVMCLVFMEANQKYSF-----TTASSFFRECGIVAYGDDHVVSVPEKY----LSVFNQQTLPVLM--SKFGMFYTIETKD-DTEIDFLS-RRLEDVSYLKRNF---V-YDESRQRYI-----APLSLDVV
>gi|13516401|dbj|BAB40439.1|
RLFTVLPMSYNIAIRKKFLNFVRFFMKRRD-VLPAQVG-VNPYSRE-----WTRIANKL-LSKGNNILCCDYSRFDGFLPKCVMNEIGDMIARVMRA--ND--ESKT---QIK---NLMLACTSRYAMCNR----ILYRVENGIPSGFPLTVIVNSILNEILVKYAYWHCFVDNP------IVQSNFDAHVSMVVYGDDNLISVSDAI----SSKFDGNFLVKFM--EGLGIKVTDGIDK-TKI-GIEF-RRLENCDFLKRSF---K-LNPD-GTWR-----SPMSKESL
>gi|18623498|gb|AAL76111.1|
RVFTGAPIDVLLGAKVLVDNFNHLFTETHL-KGPWTVG-INKFNCG-----WNALAQAF--NHEWAFIDADGSRFDSSITPLMFHNVLEIREYFGNF--CD--DEVQ--ALRS---LYTQIIYTPIQTIEG----FVCKKFRGNNSGQPSTVVDNTLILMLAVEYC---------------RARSGAKMNFKFVANGDDLILNAPREE----VSVIKSEFPGWL---RECGLTYDLSKEN-ES---------IKDVDFLSHRF---L-YDDRLGIYL-----PKLDEERI
>gi|25014020|ref|NP_733954.1|
RIFEILPFHYNILVRKYYLFFMQFIMSLHD-FLPCKVG-LNVYSKS-----WDTMHAEH--NRFAYHFNGDYTGFDTATPRVLMMKIADMVSNLAGD--GR--ENAI---VRR---NLMKMAVERRILVLR----DLYQVKGGTPSGFALTVIINSVVNQFYLMWAWRKIMSRIDPGL---VPYRVMRSHCTFSVYGDDNVVSFSLQV----KDMYNLVTIAAEL--KTIGVNLSDGKKT-GNLVKWME---FSELDFLKRRW---VLYSGQ--GFL-----CPLHKSAI
>gi|19744020|emb|CAA76842.3|
RVFTAAPFDVSFGAKAFVDGFNNKFYERQA-GSHWTVG-INKFNCG-----WDELARRF--NHDWKFIDADGSRYDSSLTPLLFNCVLHIREHFMDL--DS--DEKR--CLRN---LYTQLVWTPVSTITG----QIVKKCKGGPSGQPSTVVDNTLMLMIAVEYSKLRT--------------KIADSELNYTCNGDDLLLNASLDT----CTKIRESFTETM---KDLGLTYEFDVEV-DN---------IGQVEYMSHKW---L-NACG--MLI-----PKLSRERI
>gi|464431|sp|Q05057|POLG_PYFV1
RLFSILPVEFNMHARRLFLDFNVFVMANRH-KHGIMVG-INPHSRE-----WSDLAISL-ASFSPYGFNGDFANFDGMFHPSSFSMVSELANIFYGNFLST--ERD----------NLTRMLTNRFSLMKG----AILRVPGGGPSGFPMTVIFNSFINLFYLQSAWIMLARFNGRQDI--SHPCNFPKYVRACVYGDDNIVAIKMEV----LPWYNLQTVSEALF-DYFGVTMTDGAKN-KASEAKPY-GKILEFDFLKRHF---K-ADEL----IPSLFHAPLHKRSI
>gi|6003485|gb|AAF00472.1|
RAFSGCPLEYLAVCKMYFQGIVSVLTKCKN-ETHISVG-TNVYSKD-----WDFMARYL-KSKSDGFVAGDFEGFDSSQLVPILREIGNVFNGIARQ--FP--DWKPEDDEVRL--VLLQSLWHSIHINGG----DVVMWGHALPSGHYLTAPYNSLYATMLFSMAFVILSRRNGTRMGPSMLASKFFKEFGFVAYGDDHICAVPKRY----QSFFNQMTLEKVF--LELGIGYTTEDKR-EIDVPIRS---LDEIAYLKRSF---V-LDEERQQWI-----APLTLDTV
>gi|30793780|ref|NP_851403.1|
RVFSNGPMDFSIAFRMYYLGFIAHLMENRI-TNEVSIG-TNVYSQD-----WSKTVRKL-TKFGNKVIAGDFSTFDGSLNVCIMEKFADLANEFYDD--GP--ENAL---IRH---VLLMDVYNSVHVCND----SVYMMTHSQPSGNPATTPLNCFINSMGLRMCFSICATKAAVK----MTMRDFSKHVSLVSYGDDNVINFSDEV----SAWYNMSTIAEAF--STLGFTYTDELKG-VRGEVPNW-RSIQDVQYLKRKF---R-YDNQRKVWE-----APLCMDTI
>gi|14701765|gb|AAK72220.1|
RVFAASNQGLALALRRYYLSFLDHVMTNRI-DNEIGLG-VNVYSYD-----WTRIVNKL-KRVGDKVIAGDFSNFDGSLNSQILSRVSEIVTDWYGD--DA--ENGL---IRH---TLLEYLFNATWLMNG----KVFQLNHSQPSGNPLTTLINCVYNMIIFRYVYLLAQRENGFP----MTLSGFTTNVACIFYGDDSLCSVSDKV----SEWFNQHVITRLM--AATGHEYTDETKS-GSPPPYRS---LSEVTFLKREF---V-LRDH--FWI-----APLSRNTI

##Information on RT-like domains are obtained from the NCBI database. The Alignment for the plant PRV RT domain is avaiable in S4D Fig.
