# Supplementary material
Source: publisher figshare collection journal article supplement (https://plos.figshare.com/articles/dataset/_/5160220)
Supplement: Supplementary file 1 [file 1 › S1 Fig.pdf]

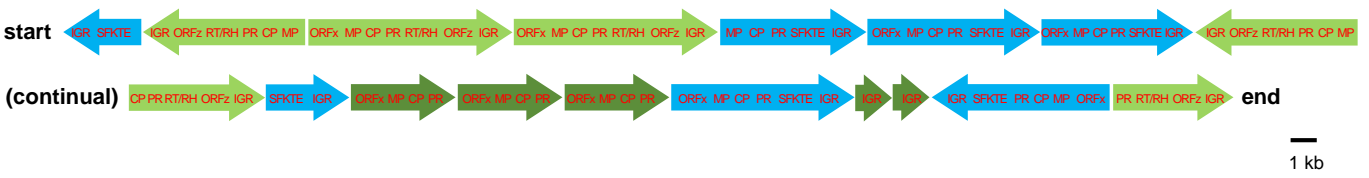

**S1 Fig. Clustering of eRTBVL2 and eRTBVL-X sequences on chromosome 8 of the *Oryza sativa* genome.** Blue, light green, and dark green indicate eRTBVL2, eRTBVL-X, and ambiguous (eRTBVL2 or eRTBVL-X) sequences, respectively. The structures of eRTBVL2 and eRTBVL-X sequences are marked with red fonts and their lengths are drawn roughly to scale. These eRTBVL2 segments were formerly undistinguished from eRTBVL-X segments in the eRTBVL-X cluster [30].
