# Supplementary material
Source: publisher figshare collection journal article supplement (https://plos.figshare.com/articles/dataset/_/5160220)
Supplement: Supplementary file 1 [file 1 › S1 Table.pdf]

**S1 Table. Information on grass genomes investigated in this study.**

| Genome                         | Common name              | Data source | Data version   |
|--------------------------------|--------------------------|-------------|----------------|
| <i>Oryza sativa (japonica)</i> | Rice (AA-genome)         | Gramene     | IRGSP-1.0      |
| <i>Oryza glaberrima</i>        | African rice (AA-genome) | Gramene     | AGI1.1         |
| <i>Oryza glumaepatula</i>      | Wild rice (AA-genome)    | Gramene     | ALNU02000000   |
| <i>Oryza longistaminata</i>    | Wild rice (AA-genome)    | NCBI        | AMDW00000000.1 |
| <i>Oryza meridionalis</i>      | Wild rice (AA-genome)    | Gramene     | ALNW00000000   |
| <i>Oryza punctata</i>          | Wild rice (BB-genome)    | Gramene     | AVCL00000000   |
| <i>Oryza brachyantha</i>       | Wild rice (FF-genome)    | Gramene     | V1.4b          |
| <i>Zizania latifolia</i>       | Wild rice                | NCBI        | ASSH00000000.1 |
| <i>Hordeum vulgare</i>         | Barley                   | Gramene     | IBSC_1.0       |
| <i>Hordeum pubiflorum</i>      | -                        | NCBI        | CBMN00000000.1 |
| <i>Triticum aestivum</i>       | Bread wheat              | Gramene     | IWGSP1         |
| <i>Triticum urartu</i>         | Wheat                    | Gramene     | ASM34745v1     |
| <i>Aegilops tauschii</i>       | Goatgrass                | Gramene     | ASM34733v1     |
| <i>Brachypodium distachyon</i> | Purple false brome       | Phytozome   | JGI v1.0       |
| <i>Zea mays</i>                | Maize                    | Gramene     | AGPv3          |
| <i>Sorghum bicolor</i>         | Sorghum                  | Phytozome   | JGI v2.1       |
| <i>Setaria italica</i>         | Foxtail millet           | Phytozome   | JGI v2.0       |
| <i>Setaria viridis</i>         | Green foxtail            | NCGR        | V02            |
| <i>Panicum virgatum</i>        | Switchgrass              | Phytozome   | V1.1           |
| <i>Panicum hallii</i>          | Hall's panicgrass        | Phytozome   | V0.5           |
