# Supplementary material
Source: publisher figshare collection journal article supplement (https://plos.figshare.com/articles/dataset/_/5160220)
Supplement: Supplementary file 1 [file 1 › S2 Table.pdf]

**S2 Table. Identification of functional domains in protein sequences of ePVCVL and ePVCVL2.**

| Query                                 | Domain number | Domain name/description                          | Note  | Query residues | Subject residues | Probability (%) | <i>P</i> value | E value  |
|---------------------------------------|---------------|--------------------------------------------------|-------|----------------|------------------|-----------------|----------------|----------|
| ePVCVL <i>Oryza</i> group (ORF1)      | PF01107       | MP: Viral movement protein                       | MP    | 52-215         | 13-182           | 99.9            | 1.50E-30       | 1.80E-25 |
|                                       | g.40.1        | Retrovirus zinc finger-like domains              | CP    | 920-944        | 15-39            | 96.4            | 3.20E-08       | 3.80E-03 |
|                                       | PF02160       | Peptidase_A3: Cauliflower mosaic virus peptidase | PR    | 1143-1277      | 6-144            | 99.7            | 1.40E-22       | 1.70E-17 |
| ePVCVL2 <i>Oryza</i> group            | PF01107       | MP: Viral movement protein                       | MP    | 53-212         | 14-179           | 99.9            | 8.30E-31       | 9.80E-26 |
|                                       | PF02160       | Cauliflower mosaic virus peptidase (A3)          | PR    | 783-968        | 3-201            | 99.6            | 5.90E-20       | 7.00E-15 |
|                                       | 4OL8          | Reverse transcriptase/ribonuclease H             | RT/RH | 941-1417       | 13-478           | 100             | 1.40E-82       | 1.70E-77 |
| ePVCVL non- <i>Oryza</i> group (ORF1) | PF01107       | MP: Viral movement protein                       | MP    | 48-216         | 9-183            | 99.9            | 1.30E-30       | 1.60E-25 |
|                                       | g.40.1        | Retrovirus zinc finger-like domains              | CP    | 937-962        | 16-41            | 97.5            | 8.20E-10       | 9.80E-05 |
|                                       | PF02160       | Peptidase_A3: Cauliflower mosaic virus peptidase | PR    | 1158-1332      | 6-197            | 99.8            | 1.70E-24       | 2.00E-19 |
| ePVCVL2 non- <i>Oryza</i> group       | PF02160       | Peptidase_A3: Cauliflower mosaic virus peptidase | PR    | 714-896        | 6-201            | 99.4            | 1.40E-17       | 1.70E-12 |
|                                       | 4OL8          | Reverse transcriptase/ribonuclease H             | RT/RH | 881-1343       | 25-476           | 100             | 2.70E-81       | 3.20E-76 |

Domain identification was fulfilled with HHpred [38]. The hits with the best *P* value for each block of query residues are displayed. The SFKTE domain of ePVCVL and the ORF2 of ePVCVL2 are functionally unknown.
