# Supplementary material
Source: publisher figshare collection journal article supplement (https://plos.figshare.com/articles/dataset/_/5160220)
Supplement: Supplementary file 1 [file 1 › S3 Dataset.txt]

#for Fig. 1C
>Chr08:11154175-11155263:-1
AGCTAGCTCTCGTGAATCCACAGTAGCGAAGAGATAAGCAGGAGACACAGGCGACGCCATCCCTGGCCTCTATAAAAGGAGACGTTGGCCTTCACTCCGAGACACCATCCAGAGCAAAGCTTTCAAGCGCGCTCTCACCCTCCATTCCACCATTCTTAGTAGTAGTGACTTTAGCATACCTTGCATA--GTATATTGAAGCAAGGAGTTGTGTAATAACGCTGTGTAAGGTAAGAACAGCTTGCTTGTACCTACCTTCGGGCTTCCCGAAAGGGAAAACCGTATGTAAGCTTATCTGTTTAATATGAAGTAATTTTCCTTAAGTATTCCTGCACGTTTGTTCTAGACAAGTGTTTATGCTAAGGACCCTATAGGAGAAACCTCTTCGGTTTGTTCTCGTTTTTAGCCTGCATCTTGCATAGGCGTCTGGAGAATCGGTATCCGTAGAGAAGTGTTCCCTTCGGGTGGAACTGCCTGGGGAGACGATAAACTCTTAGCTAGAACAAGTGTGACTTGGAATATCTTGTTA-AGTTGCTTCTAAAAAGATAGATAGGTGAGGCATACGGTGAGTACCGAGTAGGACTTTACATCAT
>Chr08:11267374-11268378:1
AGCTAGCTCTCGTGAATCCACAGTAGCGAAGAGATAAGCAGGAGACACAGGCGACGCCATCCCTGGCCTCTATAAAAGGAGACGTTGGCCTTCACTCCGAGACACCATCCAGAGCAAAGCTTTCAAGCGCGCTCTCACCCTCCATTCCACCATTCTTAGTAGTAGTGACTTTAGCCTACCTTGCATAA-GTATATTGAAGCAAGGAGTGGTGTAATAACGCTGTGTAAGGTAAGAACAGCTTGCTTGTACCTACCTTCGGGTTTCCCGAAAGGGAAAACCGTATGTAAGCTTATCTGTTTAATATGAAGTAATTTTCCTTAAGTATTCCTGCACGTTTGTTCTAGACAAGTGTTTATGCTAAGGACCCTATAGGAGAAACCTCTTCGGTTTGTTCTCGTTTTTAGCCTGCATCCTGCATAGGCGTCTGGAGAACCGGTATCCGTAGAGAAGTGTTCCCTTCGGGTGGAACTGCCTGGGGAGACGATAAACTCTTAGCTAGAACAAGTGTGACTTGGAATATCTTTTTA-AGTTGCTTCTAAAAAGACAGATAGGTGAGGCATACGGTGAGTACCGAGTAGGACTTTACATCAT
>Chr08:11273819-11274880:1
AGCTAGCTCTCGTGAATCCACAGTAGCGAAGAGATAAGCAGGAGACACAGGCGACGCCATCCCTGGCCTCTATAAAAGGAGACGTTGGCCTTCACTCCGAGACACCATTCAGAGCAAAGCTTTCAAGCGCGCTCTCACCCTCCATTCCACCGTTCTTAGTAGTAGTGACTTTAGCCTACCTTGCATAA-GTATATTGAAGCAAGGAGTGGTGTAATAACGCTGTGTAAGGTAAGAACAGCTTGCTTGTACCTACCTTCGGGTTTCCCGAAAGGGAAAACCGTATGTAAGCTTATCTGTTTAATATGAAGTAATTTTCCTTAAGTATTCCTGCACGTTTGTTCTAGACAAGTGTTTATGCTAAGGACCCTATAGGAGAAACCTCTTCGGTTTGTTCTCGTTTTTAGCCTGCATCTTGCATAGGCGTCTGGAGAATCGGTATCCGTAGAGAAGTGTTCCCTTCGGGTGGAACTGCCTGGGGAGACGATAAACTCTTAGCTAGAACAAGTGTGACTTGGAATATCTTGTTA-AGTTGCTTCTAAAAAGATAGATAGGTGAGGCATACGGTAAGTACCGAGTAGGACTTTACATCAT
>Chr08:11281063-11282067:1
AGCTAGCTCTCGTGAATCCACAGTAGCGAAGAGATAAGCAGGAGACACAGGCGACGCCATCCCTGGCCTCTATAAAAGGAGACGTTGGCCTTCACTCCGAGACACCATTCAGAGCAAAGCTTTCAAGCGCGCTCTCACCCTCCATTCCACCGTTCTTAGTAGTAGTGACTTTAGCCTACCTTGCATAA-GTATATTGAAGCAAGGAGTGGTGTAATAACGCTGTGTAAGGTAAGAACAGCTTGCTTGTACCTACCTTCGGGTTTCCCGAAAGGGAAAACCGTATGTAAGCTTATCTGTTTAATATGAAGTAATTTTCCTTAAGTATTCCTGCACGTTTGTTCTAGACAAGTGTTTATGCTAAGGACCCTATAGGAGAAACCTCTTCGGTTTGTTCTCGTTTTTAGCCTGCATCCTGCATAGGCGTCTGGAGAACCGGTATCCGTAGAGAAGTGTTCCCTTCGGGTGGAACTGTCTGGGGAGACGATAAACTCTTAGCTAGAACAAGTGTGACTTGGAATATCTTTTTA-AGTTGCTTCTAAAAAGACAGATAGGTGAGGCATACGGTAAGTACCGAGTAGGACTTTACATCAT
>Chr08:11287245-11288210:1
AGCAAGCTCTCGTGAATCCACAGTAGCGAAGAGATAAGCAGGAGACACAGGCGAAGCCATCCCTGGCCTCTATAAAAGGACAACAACAACGAAACAACGAGACACCATTCAGAGCAAAGCTTCCAAGCGCGCTCTCACCCTCCATTCCACCATTCTTAGTAGTAGTGACTTTAGACTACCTTGCATA--GTATATTGAAGCAAGGAGGTGTGTTATAACGCTGTGTAAGGTAAGAACAGCTTGCTTGTACCTACCTTCGGGTTTCCCGAAAGGGAAAACCGTATGTAAGCTTATCTGTTTAATATGAAGTAATTTTCCTTAAGTATTCCTGCACGTTTGTTCTAGACAAGTGTTTATGCTAAGGACCCTATAGGAGAAACCTCTTCGGTTTGTTCTCGTTTTTAGCCTGCATCTTGCATAGGCGTCTGGAGAATCGGTATCCGTAGAGAAGTGTTCCCTTCGGGTGGAACTGCCTGGGGAGACGATAAACTCTTAGCTAGAACAAGTGTGGCTTGGAATATCTTTTTA-AGTTGCTTCTAAAAAGACAGATAGGTGAGGCATACGGTGAGTACCGAGTAGGACTTTATATCAT
>Chr08:11301730-11302733:1
AGCTAGCTCTCGTGAATCCACAGTAGCGAAGAGATAAGCAGGAGACACAGGCGACGCCATCCCTGGCCTCTATAAAAGGAGACGTTGGCCTTCACTCCGAGACACCATCCAGAGCAAAGCTTTCAAGCGCGCTCTCACCCTCCATTCCACCGTTCTTAGTAGTAGTGACTTTAGCCTACCTTGCATA--GTATATTGAAGCAAGGAGTTGTGTAATAACGCTGTGTAAGGTAAGAACAGCTTGCTTGTACCTACCTTCGGGTTTCCCGAAAGGGAAAACCGTATGTAAGCTTATCTGTTTAATATGAAGTAATTTTCCTTAAGTATTCCTGCACGTTTGTTCTAGACAAGTGTTTATGCTAAGGACCCTATAGGAGAAACCTCTTCGGTTTGTTCTCGTTTTTAGCCTGCATCCTGCATAGGCGTCTGGAGAACCGGTATCCGTAGAGAAGTGTTCCCTTCGGGTGGAACTGCCTGGGGAGACGATAAACTCTTAGCTAGAACAAGTGTGACTTGGAATATCTTTTTA-AGTTGCTTCTAAAAAGACAGATAGGTGAGGCATACGGTAAGTACCGAGTAGGACTTTACATCAT
>Chr08:11321347-11322354:1
AGCTAGCTCTCGTGAATCCACAGTAGCGAAGAGATAAGCAGGAGACACAGGCGACGCCATCCCTGGCCTCTATAAAAGGAGACGTTGGCCTTCACTCCGAGACACCATTCAGAGCAAAGCTTTCAAGCGCGCTCTCACCCTCCATTCCACCGTTCTTAGTAGTAGTGACTTTAGCCTACCTTGCATA--GTATATTGAAGCAAGGAGTTGTGTAATAACGCTGTGTAAGGTAAGAACAGCTTGCTTGTACCTACCTTCGGGTTTCCCGAAAGGGAAAACCGTATGTAAGCTTATCTGTTTAATATGAAGTAATTTTCCTTAAGTATTCCTGCACGTTTGTTCTAGACAAGTGTTTATGCTAAGGACCCTATAGGAGAAACCTCTTCGGTTTGTTCTCGTTTTTAGCCTGCATCTTGCATAGGCGTCTGGAGAATCGGTATCCGTAGAGAAGTGTTCCCTTCGGGTGGAACTGCCTGGGGAGACGATAAACTCTTAGCTAGAACAAGTGTGACTTGGAATATCTTTTTA-AGTTGCTTCTAAAAAGACAGATAGGTGAGGCATACGGTGAGTACCGAGTAGGACTTTATATCAT
>Chr08:11324551-11325552:-1
AGCTAGCTCTCGTGAATCCACAGTAGCGAAGAGATAAGCAGGAGACACAGGCGACGCCATCCCTGGCCTCTATAAAAGGAGACGTTGGCCTTCACTCCGGGACACCATTCAGAGCAAAGCTTTCAAGCGCGCTCTCACCCTCCATTCCACCGTTCTTAGTAGTAGTGACTTTAGCCTACCTTGCATA--GTATATTGAAGCAAGGAGTTGTGTAATAACGCTGTGTAAGGTAAGAACAGCTTGCTTGTACCTACCTTCGGGTTTCCCGAAAGGGAAAACCGTATGTAAGCTTATCTGTTTAATATGAAGTAATTTTCCTTAAGTATTCCTGCACGTTTGTTCTAGACAAGTGTTTATGCTAAGGACCCTATAGGAGAAACCTCTTCGGTTTGTTCTCGTTTTTAGCCTGCATCTTGCATAGGCGTCTGGAGAATCGGTATCCGTAGAAAAGTGTTCCCTTCGGGTGGAACTGCCTGGGGAGACGATAAACTCTTAGCTAGAACAAGTGTGACTTGGAATATCTTGTTA-AGTTGCTTCTAAAAAGATAGATAGGTGAGGCATACGGTAAGTACCGAGTAGGACTTTATATCAT
>Chr09:15200233-15201270:1
AGCTAGCTCTCGTGAATCCACAGTAGCGAAGAGATAAGCAGGAGACACAGGCGAAGCCATCTCTGGCCTCTATAAAAGGAGACGTTGGCCTTCACTCCGAGACACCATTCAGAGCAAAGCTTCCAAGCGCGCTCTCACCCTCCATTCCACCGTTCTTAGTAGTAGTGACTTTAGCCTACCTTGCATA--GTATATTGAAGCAAGGAGTTGTGTTATAACGCTGTGTAAGGTAAGAACAGCTTGCTTGTACCTACCTTCGGGTTTCCCGAAAGGGAAAACCGTATGTAAGCTTATCTGTTTAATATGAAGTAATTTTCCTTAAGTATTCCTGCACGTTTGTTCTAGACAAGTGTTTATGCTAAGGACCCTATAGGAGAAACCTCTTCGGTTTGTTCTCGTTTTTAGCCTGCATCTTGCATAGGCGTCTGGAGAATCGGTATCCGTAGAGAAGTGTTCCCTTCGGGTGGAACTGCCTGGGGAGACGATAAACTCTTAGCTAGAACAAGTGTGGCTTGGAATATCTTTTTA-AGTTGCTTCTAAAAAGACAGATAGGTGAGGCATACGGTGAGTACCGAGTAGGACTTTATATCAT
>Chr10:23209998-23211035:-1
AGCCAGCTCCCGTGAAGATACAGTAGCGAAGAGATAAGCAGGAGGCACAGGCGACGCCATCCCTGGCCTCTATAAAAGGAGACGTTGGCCTTCACTCCGGGACACCATTCAGAGCAAAGCTTCCAAGCGCGCTCTCACCCTCCATTCCACCGTTCTTAGTAGTAGTGACTTTAGCCTACCTTGCATA--GTATATTGAAGCAAGGAGTTGTGTAATAACGCTGTGTAAGGTAAGAACAGCTTGCTTGTACCTACCTTCGGGTTTCCCGAAAGGGAAAACCGTATGTAAGCTTATCTGTTTAATATGAAGTAATTTTCCTTAAGTATTCCTGCACGTTTGTTCTAGACAAGTGTTTATGCTAAGGACCCTATAGGAGAAACCTCTTCGGTTTGTTCTCGTTTTTAGCCTGCATCTTGCATAGGCGTCTGGAGAATCGGTATCCGTAGAGAAGTGTTCCCTTTGGGTGGAACTGCCTGGGGAGACGATAAACTCTTAGCTAGAACAAGTGTGACTTGGAATATCTTGTTA-AGTTGCTTCTAAAAAGATAGATAGGTGAGGCATACGGTGAGTACCGAGTAGGACTTTACATCAT
>Chr10:23216877-23217921:-1
AGCCAGCTCCCGTGAAGATACAGTAGCGAAGAGATAAGCAGGAGGCACAGGCGACGCCATCCCTGGCCTCTATAAAAGGAGACGTTGGCCTTCACTCCGGGACACCATTCAGAGCAAAGCTTCCAAGCGCGCTCTCACCCTCCATTCCACCGTTCTTAGTAGTAGTGACTTTAGCCTACCTTGCATA--GTATATTGAAGCAAGGAGTTGTGTAATAACGCTGTGTAAGGTAAGAACAGCTTGCTTGTACCTACCTTCGGGTTTCCCGAAAGGGAAAACCGTATGTAAGCTTATCTGTTTAATATGAAGTAATTTTCCTTAAGTATTCCTGCACGTTTGTTCTAGACAAGTGTTTATGCTAAGGACCCTATAGGAGAAACCTCTTCGGTTTGTTCTCGTTTTTAGCCTGCATCTTGCATAGGCGTCTGGAGAATTGGTATCCGAAGAGAAGTGTTCCCTTTGGGTGGAACTGCCTGGGGAGACGATAAACTCTTAGCTAGAACAAGTGTGACTTGGAATATCTTGTTA-AGTTGCTTCTAAAAAGATAGATAGGTGAGGCATACGGTGAGTACCGAGTAGGACTTTACATCAT
>Chr11:9662604-9663553:1
AGCCAGCTCCCGTGAAGATACAGTAGCGAAGAGATAAGCAGGAGGCACAGGCGACGCCATCCCTGGCGTCTATAAAAGGAGACGTTGGCCTTCACTCCGGGACACCATTCAGAGCAAAGCTTCCAAGCGCGCTCTCACCCTCCATTCCATCTTTCTTAGTAGTAGTTCCTCTAGCCTACCTTGCATAATATATATTGAAGCAAGGAGTTGTAATATAAAGGTTTGTAAGGTGAGAAAAACTTGTTTGTATCTACCTTCGGGGTTCCCGAAAGGGAAAACCGTATGTAAGCCTATTTGCTTAATATGAAGTAATTTTCTTTAAGTTTCCCTGTTTGTTTGCTCTAGATAAGCGTTTATGCTAGGGACCCTATAGGAGAAACCTC-TCGGAT-GTTCTCGTTTTTAGCCTGCATCTTGCATAGGCGTCTGGAGAACCAGTATCCGTAGAGAAGTGTTCCCCTCGGGTGGAACTGCCTGGGGAGATGGTAAACGCTTAGCTAGTTCAAATATGACTAGGGATACCTGAAGTTGGTTGCTT--AAATAGGCAGATAAGTGAGGCATACGGCTAGTACCGAGTAGGACTTTAAAATTT
>Chr12:23127508-23128541:-1
AGCCTGCTCTCGTGAATCCACAGTAGCGAAGAGATAAGCAGGAGGCACAGGCGACGCCACCCCTGACCTCTATAAAAGGAGGGGTTTGCCCA-GCTGAGAGACACCATTCAGAGCAAAGCTTCCAAGCGCGCTCTCACCCTCCATTCCACCGTTCTTAGTAGTAGTGACTTTAGCCTACCTTGCATA--GTATATTGAAGCAAGGAGGTGTGTTATAACGCTGTGTAAGGTAAGAACAGCTTGCTTGTACCTACCTTCGGGTTTCCCGAAAGGGAAAACCGTATGTAAGCTTATCTGTTTAATATGAAGTAATTTTCCTTAAGTATTCCTGCACGTTTGTTCTAGACAAGTGTTTATGCTAAGGACCCTATAGGAGAAACCTCTTCGGTTTGTTCTCGTTTTTAGCCTGCATCTTGCATAGGCGTCTGGAGAATCGGTATCCGTAGAGAAGTGTTCCCTTCGGGTGGAACTGCCTGGGGAGACGATAAACTCTTAGCTAGAACAAGTGTGACTTGGAATATCTTTTTA-AGTTGCTTCTAAAAAGACAGATAGGTGAGGCATACGGTGAGTACCGAGTAGGACTTTACATCAT
>Chr10:9815562-9814658:-1
AGCCTGCTCTCGTGACTCCACAGTAGCGAAGAGATAAGCAGGAGGCACAGGCGACGCCACCCCTGACCTGTATAAAAGGAGGGGCCTGCCCA-GCTGAGGGACAGCATTCAGAGCAAAGCTTCCAAGCGCGCTCTCACCCTCCATTCCACCGTTCTTAGTAGTAGTGACTTTAGCCTACCTTGCGTA--GTATATTGAAGCAAGGAGTTGTATTATAACGCTGTGTAAGGTAAGAACAACTTGCTTGTACCTACCTTCGGGTTTCCAGAAAGGGAAAACCGTATGTAAGCTTATCTGTTTAATATGAAGTAATTTTCCTTAAGTATTCCTGCACGTTTGTTCTAGAGAAGTGTTTATGCTAAGGACCCTATAGGAGAAACCTCTTCGGTTTGTTCTCGTTTTTAGCCTGCATCTTGCATAGGCGTCTGGAGAATCGGTATCCGTAGAGAAGTGTTCCCTTCGGGTGGAACCGCCTGGG-AGACGATAAACTCTTAGCTAGAACAAGTGTGACTTGGAATATCTTTTTA-AGTTGCTTCTAAAAAGACAGATAGGTGAGGCATACGGTGAGTACCGAGTAGGACTTTACATCAT
>Chr10:9826644-9827712:-1
AGCCTGCTCTCGTGAATCCACAGTAGCGAAGAGATAAGCAGGAGGCACAGGCGACGCCACCCCTGACCTGTATAAAAGGAGGGGCCTGCCCA-GCTGAGGGATACCATTCAGAGCAAAGCTTCCAAGCGCGCTCTCACCCTCTATTCCACCGTTCTTAGTAGTAGTGACTTTAGCCTACCTTACATA--GTATATTGAAGTAAGGAGTTGTGTTATAACGGTGTGTAAGGTAAGAACAGCTTGCTTGTACCTACCTTCGGGTTTCCAGAAAGGAAAAACCGTATGTAAGCTTATCTGTTTAATATGAAGTAATTTTCCTTAAGTATTCCTGCACGTTTGTTCTAAACAAGTGTTTATGCTAAGGACCCTATAGGAGAAACCTCTTCGGTTTGTTCTCGTTTTTAGCCTGCATCTTGCATAGGCGTCTGGAGAATCGGTATCCGTAGAGAAGTGTTCCCTTCGGGTGGAACCGCCTGGGGAGACGATAAACTCTTAGCTAGAACAAGTGTGACTTGGAATATCTTTTTA-AGTTGCTTCTAAAAAGACAGATAGGTGAGGCATACGGTGAGTACCGAGTAGGACTTTACATCAT
>Chr10:14872094-14873207:-1
AGCCAGCTCCCGTGAAGATACAGTAGCGAAGAGATAAGCAGGAGGCACAGGCGACGCCATCCCTGGCCTCTATAAAAGGAGACGTTGGCCTTCACTCTGGGACACCATTCAGAGCAAAGCTTCCAAGCGCGCTCTCACCCTCCATTCCACCGTTCTTAGTAGTAGTGACTTTAGCCTACCTTGCATA--GTATATTGAAGCAAGGAGTTGTGTAATAACGCTGTGTAAGGTAAGAACAGCTTGCTTGTACCTACCTTCGGGTTTCCCGAAAGGGAAAACCGTATGTAAGCTTATCTGTTTAATATGAAGTAATTTTCCTTAAGTATTCCTGCACGTTTGTTCTAGACAAGTGTTTATGCTAAGGACCCTATAGGAGAAACCTCTTCGGTTTGTTCTCGTTTTTAGCCTGCATCTTGCATAGGCGTCTGGAGAATCGGTATCCGTAGAGAAGTGTTCCCTTCGGGTGGAACTGCCTGGGGAGACGATAAACTCTTAGCTAGAACAAGTGTGACTTGGAATATCTTGTTA-AGTTGCTTCTAAAAAGATAGATAGGTGAGGCTTACGGTGAGTACCGAGTAGGACTTTACATCAT
>Chr08:11298698-11299763:1
AGCTAGCTCTCGTGAATCCACAGTAGCGAAGAGATAAGCAGGAGACACAGGCGACGCCATCCCTGGCCTCTATAAAAGGAGACGTTGGCCTTCACTCCGAGACACCATTCAGAGCAAAGCTTTCAAGCGCGCTCTCACCCTCCATTCCACCGTTCTTAGTAGTAGTGATTTTAGCCTACCTTGCATA--GTATATTGAAGCAAGGAGTTGTGTAATAACGCTGTGTAAGGTAAGAACAGCTTGCTTGTACCTACCTTCGGGTTTCCCGAAAGGGAAAACCGTATGTAAGCTTATCTGTTTAATATGAAGTAATTTTCCTTAAGTATTCCTGCACGTTTGTTCTAGACAAGTGTTTATGCTAAGGACCCTATAGGAGAAACCTCTTCGGTTTGTTCTCGTTTTTAGCCTGCATCTTGCATAGGCGTCTGGAGAATCGGTATCCGTAGAGAAGTGTTCCCTTCGGGTGGAACTGCCTGGGGAGACGATAAACTCTTAGCTAGAACAAGTGTGACTTGGAATATCTTGTTA-AGTTGCTTCTAAAAAGATAGATAGGTGAGGCATACGGTAAGTACCGAGTAGGACTTTACATCAT
>Chr08:11288728-11289779:-1
AGCTAGCTCTCGTGAATCCACAGTAGCGAAGAGATAAGCAGGAGACACAGGCGACGCCATCCCTGGCCTCTATAAAAGGAGACGTTGGCCTTCACTCCGAGACACCATTCAGAGCAAAGCTTTCAAGCGCGCTCTCACCCTCCATTCCACCGTTCTTAGTAGTAGTGACTTTAGCCTACCTTGCATA--GTATATTGAAGCAAGGAGTGGTGTAATAACGCTGTGTAAGGTAAGAACAGCTTGCTTGTACCTACCTTCGGGTTTCCCGAAAGGGAAAACCGTATGTAAGCTTATCTGTTTAATATGAAGTAATTTTCCTTAAGTATTCCTGCACGTTTGTTCTAGACAAGTGTTTATGCTAAGGACCCTATAGGAGAAACCTCTTCGGTTTGTTCTCGTTTTTAGCCTGCATCTTGCATAGGCGTCTGGAGAATCGGTATCCGTAGAGAAGTGTTCCCTTCGGGTGGAACTGCCTGGGGAGACGATAAACTCTTAGCTAGAACAAGTGTGACTTGGAATATCTTGTTA-AGTTGCTTCTAAAAAGATAGATAGGTGAGGCATACGGTGAGTACCGAGTAGGACTTTACATCAT
>Chr01:754037-755077:-1
AGCCAGCTC--GTGAAAATACAGTATCTAGAAGATAAGCTTGAAGCACAGTCGA-GCC-TCCCGAGCTTCTATAAAAGGAGGGGTTTGCTCAAGCTGAGAGACACCATTCAGAGCAAAGCTTCCAAGCGCGCTCTCACCCTCCATTCCACCATTCTTAGTAGTAGTGACTTTAGCCTACCTTGCATA--GTATATTGAAGCAAGGAGTTGTGTAATAACGCTGTGTAAGGTAAGAACAGCTTGCTTGTACCTACCTTCGGGTTTCCCGAAAGGGAAAACCATATGTAAGCTTATCTGTTTAATATGAAGTAATTTTCCTTAAGTATTCCTGCACGTTTGTTCTAGACAAGTGTTTATGCTAAGGACCCTATAGGAGAAACCTCTTCGGTTTGTTCTCGTTTTTAGCCTGCATCTTGCATAGGCATCTGGAGAATCGGTATCCGTAGAGAAGTGTTCCCTTCGGGTGGAACTGCCTGGGGAGACGATAAACTCTTAGCTAGAACAAGTGTGACTTGGAATATCTTTTTA-AGTTGCTTCTAAAAAGACAGATAGGTGAGGCATACGGTGAGTACCGAGTAGGACTTTACATCAT
>Chr12:4597626-4598547:1
AGCCAGCTCCCGTGAAGATATAGTAGCGAAGAGATAAGCAGGAGGCACAGGCGACGCCATCCCTGGCCTCTATAAAAGGAGACGTTGGCCTTCACTCCGAGACACCATTCAGAGCAAAGCTTCCAAGCGCGCTCTCACCCTCTATTCCATCTTTCTTAGTAGTAGTTCCTCTAGCCTACCTTGCATAATATATATTGAAGCAAGGAGTTGTAATATAAAGGTTTGTAAGGTGAGAAAAACTTGTTTGTATCTACCTTCGGGGTTCCCGAAAGGGAAAACCGTATGTAAGCCTATTTGCTTAATATGAAGTAATTTTCTTTAAGTTTCCCCGTTTGTTTGCTCTAGATAAGCGTTTATGCTAGGGACCCTATAGGAGAAACCTC-TCGGTT-GTTCTCGTTTTTAGCCTGCATCTTGCATAGGCGTCTGGAGAACCAGTATCCGTAGAGAAGTGTTCCCCTCGGGTGGAACTGCCTGGGGAGACGGTAAACGCTTAGCTAGTTCAAATATGACTAGGGATACCTGAAGTTGGTTGCTT--AAATAGGCAGATAAGTGAGGCATACGGCTAGTACCGAGTAGGACTTTAAAATTT
>Chr12:18047746-18048690:1
AGCCAGCTCCCGTGAAGATACAGTAGCGAAGAGATAAGCAGGAGGCACAGGCGACGCCATCCCTGGCCTCTATAAAAGGAGACGTTGGCCTTCACTCCGGGACACCATTCAGAGCAAAGCTTCCAAGCGCGCTCTCACCCTCCATTCCATCTTTCTTAGTAGTAGTTCCTCTAGCCTACCTTGCATAATATATATTGAAGCAAGGAGTTGTAATATAAAGGTTTGTAAGGTGAGAAAAACTTGTTTGTATCTACCTTCGGGGTTCCCGAAAGGGAAAACCGTATGTAAGCTTATTTGCTTAATATGAAGTAATTTTCTTTAAGTTTCCCTGTTTGTTTGCTCTAGATAAGCGTTTATGCTAGGGACCCTATAGGAGAAACCTC-TCGGTT-GTTCTCGTTTTTAGCCTGCATCTTGCATAGGCGTCTGGAGAACCAGTATCCGTAGAGAAGTGTTCCCCTCGGGTGGAACTGCCTGGGGAGATGGTAAACGCTTAGCTAGTTCAAATATGACTAGGGATACCTGAAGTTGGTTGCTT--AAATAGGCAGATAAGTGAGGCATACGGCTAGTACCGAGTAGGACTTTAAAATTT
>Chr12:23186822-23187922:1
AGCCTGCTCTCGTGAATCCACAGTAGCGAAGAGATAAGCAGGAGGCACAGACGACGCCACCCCTGACCTCTATAAAAGGAGGGGCCTGCCCA-GCTGAGGGACACCATTCAGAGCAAAGCTTCCAAGCGCGCTCTCACCCTTCATTCCACCGTTCTTAGTAGTAGTGACTTTAGCCTACCTTGCATA--GTATATTGAAGCAAGGAGTTGTGTTATAACGCTGTGTAAGGTAAGAACAGCTTGCTTGTACCTACCTTCGGGTTTCCCGAAAGGGAAAACTGTATGTAAGCTTATCTGTTTAATATGAAGTAATTTTCCTTAAGTATTCCTGCACGTTTGTTCTAGACAAGTGTTTATGCTAAGGACCCTATAGGAGAAACCTCTTCGGTTTGTTTTCGTTTTTAGCCTGCATCTTGCATAGGCGTCTGGAGAATCGGTATCCGTAGAGAAGTGTTCCCTTCGGGTGGAACTGCCTGGGGAGACGATAAACTCTTAGCTAGAATAAGTGTGACTTGGAATATCTTTTTA-AGTTGCTTCTAAAAAGACAGATAAGTGAGGCATACGGTGAGTACCGAGTAGGACTTTACATCAT
>Chr12:25297171-25298170:-1
AGCCTGCTCTCGTGAATCCACAGTAGCGAAGAGATAAGCAGGAGGCACATGCGACGCCACCCCTGATCTCTATAAAAGGAGGGGCCTGCCCA-GCTGAGAGACACCATTCAGAGCAAAGCTTCCAAGCGCGCTCTCACCCTCCATTCCACCGTTCTTAGTAGTAGTGACTTTAGCCTACCTTGCATA--GTATATTGAAGCAAGGAGTTGTATTATAACGCTGTGTAAGGTAAGAACAGCTTGCTTGTACCTACCTTCGGGTTTCCCGAAAGGGAAAACCGTATGTAAGCTTATCTGTTTAATATGAAGTAATTTTCCTTAAGTATTCCTGCACGTTTGTTCTAGACAAGTGTTTATGCTAAGGACCCTATAGGAGAAACCTCTTCGGTTTGTTCTCGTTTTTAGCCTGCATCTTGCATAGGCGTCTGGAGAATCGGTATCCATAGAGAAGTGTTCCCTTCGGGTGGAACTGCCTGGGGAGACGATAAACTCTTAGCTAGAACAAGTGTGACTTGGAATATCTTTTTA-AGTTGCTTCTAAAAAGACAGATAGGTAAGGCATACGGTGAATACCGAGTAGGACTTTACATCAT
>Chr12:26690733-26691771:-1
AGCCTGCTCTCGTGAATCCACAGTAGCGAAGAGATAAGCAGGAGGCACAGGCGACGCCACCCCTGACCTCTATAAAAGGAGGGGCCTGCCCA-GCTGAGGGACACCATTCAGAGCAAAGCTTCCAAGCGCGCTCTCACCCTCCATTCCACCGTTCTTAGTAGTAGTGACTTTAGCCTACCTTGCATA--GTATATTGAAGCAAGGAGTTGTGTTATAACGCTGTGTAAGGTAAGAACAGCTTGCTTGTACCTACCTTCGGGTTTCCCGAAAGGGAAAACCGTATGTAAGCTTATCTGTTTAATATGAAGTAATTTTCCTTAAGTATTCCTGCACGTTTGTTCTAGACAAGTGTTTATGCTAAGGACCCTATAGGAGAAACCTCTTCGGTTTGTTCTCGTTTTTAGCCTGCATCTTGCATAGGCGTCTGGAGAATCGGTATCCGTAGAGAAGTGTTCCCTTCGGGTGGAACTGCCTGGGGAGACGATAAACTCTTAGCTAGAACAAGTGTGACTTGGAATATCTTTTTA-AGTTGCTTCTAAAAAGACAGATAGGTGAGGCATACGGTGAGTACCGAGTAGGACTTTACATCAT
>Chr01:11691615-11692654:-1
AGCCAGCTC--GTGAAAATACAATATCTAGAAGATAAGCTTGAAGCACAGTCGA-GCC-TCCCGAGCTCCTATAAAAGGAGGGGTTTGCTCA-GCTGAGAGACACCATTCAGAGCAAAGCTTCCAAGCGCGCTCTCACCCTCCATTCCACCGTTCTTAGTAGTAGTGACTTTAGCCTACCTTGCATA--GTATATTGAAGCAAGGAGGTGTGTTATAACGCTGTGTAAGGTAAGAACAGCTTGCTTGTACCTACCTTCGGGTTTCCCGAAAGGGAAAACCGTATGTAAGCTTATCTGTTTAATATGAAGTAATTTTCCTTAAGTATTCCTGCACTTTTGTTCTAGACAAGTGTTTATGCTAAGGACCCTATAGGAGAAATCTCTTCGGTTTGTTCTCGTTTTTAGCCTGCATCTTGCATAGGCGTCTGGAGAATCGGTATCCGTAGAGAAGTGTTCCCTTCGGGTGGAACTGCCTGGGGAGACGATAAACTCTTAACTAGAACAAGTGTGGCTTGGAATATCTTTTTA-AGTTGCTTCTAAAAAGACAGATAGGTGAGGCATACGGTGAGTACCGAGTAGGACTTTACATCAT
>Chr01:32638773-32639736:1
AGCCAGCTC--GTGAAAATACAGTATCTAGAAGATAAGCTTGAAGCATAGTCGA-GCC-TCCCGAGCTCCTATAAAAGGAGGGGTTTGCTCA-GCTGAGAGACACCATTCAGAGCAAAGCTTTCAAGCGCGCTCTCACCCTCCATTCCACCATTCTTAGTAGTAGTGACTTTAGCCTACCTTGCATA--GTATATTGAAGCAAGGAGTTGTGTTATAACGCTGTGTAAGGTAAGAACAGCTTGCTTGTACCTACCTTCGGGTTTCCCGAAAGGGAAAACCGTATGTAAGCTTATCTGTTTAATATGAAGTAATTTTCCTTAAGTATTCCTGCACGTTTATTCTAGACAAGTGTTTATGCTAAGGACCCTATAGGAGAAACCTCTTCGGTTTGTTCTCGTTTTTAGCCTGCATCTTGCATAGGCGTCTGGAGAATCGGTATCCGTAGAGAAGTGTTCCCTTCGGGTGGAACTGCCTGGGGAGACGATAAACTCTTAGCTAGAACAAGTGTGACTTGGAATATCTTTTTA-AGTTGCTTCTAAAAAGATAGATAGGTGAGGCATACGGTGAGTACCGAGTAGGACTTTACATCAT
>Chr02:8821097-8822166:1
AGCCAGCTCCCGTGAAGATACAGTAGCGAAGAGATAAGCAGGAGGCACAGGCGACGCCATCCCTGGCCTCTATAAAAGGAGACGTTGGCCTTCACTCCGGGACACCATTCAGAGCAAAGCTTCCAAGCGCGCTCTCACCCTCCATTCCACCGTTCTTAGTAGTAGTGACTTTAGCCTACCTTGCATA--GTATATTGAAGCAAGGAGTTGTGTAATAGCGCTGTGTAAGGTAAGAACAGCTTGCTTGTACCTACCTTCGGGTTTCCCGAAAGGGAAAACCGTATGTAAGCTTATCTGTTTAATATGAAGTAATTTTCCTTAAGTATTCCTGCACGTTTGTTCTAGACAAGTGTTTATGCTAAGGACCCTATAGGAGAAACCTCTTCGGTTTGTTCTCGTTTTTAGCCTGCATCTTGCATAGGCGTCTGGAGAATCGGTATCCGTAGAGAAGTGTTCCCTTCGGGTGGAACTGCCTGGGGAGACGATAAACTCTTAGCTAGAACAAGTGTGACTTGGAATATCTTGTTA-AGTTGCTTCTAAAAAGATAGATAGGTGAGGCTTACGGTGAGTACCGAGTAGGACTTTACATCAT
>Chr03:5281653-5282618:1
AGCCTGCTCTCGTGAATCCACAGTAGCGAAGAGATAAGCAGGAGGCACAGGCGACGCCACCCCTGACCTCTATAAAAGGAGGGGCCTGCCCA-GCTGAGGGACACCATTCAGAGCAAAGCTTCCAAGCACGCTCTCACCCTCCATTCCACCGTTCTTAGTAGTAGTGACTTTAGCCTACCTTGCATA--GTATATTGAAGCAAGGAGTTGTGTTATAACGCTGTATAAGGTAAGAACAGCTTGCTTGTACCTACCTTCGGGTTTCCCGAAAGGGAAAACCGTATGTAAGCTTATCTGTTTAATATGAAGTAATTTTCCTTAAGTATTCCTGCACGTTTGTTCTAGACAAGTGTTTATGCTAAGGACCCTATAGGAGAAACCTCTTCGGTTTGTTCTCGTTTTTAGCCTGCATCTTACATAGGCGTCTAGAGAATCGGTATCCGTAGAGAAGTGTTCCCTTCGGGTGGAACTGTCTGGGGAGACGATAAACTCTTAGCTAGAACAAGTGTAACTTGGAATATCTTTTTA-AGTTGCTTCTAAAAAGACAGATAGGTGAGACATACGATGAGTACCGAGTAGGACTTTACATCAT
>Chr04:9822368-9823344:-1
AGCCAGCTC--GTGAAAATACAGTATCTAGAAGATAAGCTTGAAGCACAGTCGA-GCC-TCCCGAGCTCCTATAAAAGGAGGGGTTTGCCCA-GCTGAGGGACACCATTCAGAGCAAAGCTTCCAAGCGCGCTCTCACCCTCCATTCCACCGTTCTTAGTAGTAGTGACTTTAGCCTACCTTGCATA--GTATATTGAAGCAAGGAGTTGTGTTATAACGCTGTGTAAGGTAAGAACAGCTTGCTTGTACCTACCTTCGGGTTTCCCAAAAGGGAAAACCGTATGTAAGCTTATCTGTTTAATATGAAGTAATTTTCCTTAAGTATTCCTGCACGTTTGTTCTAGACAAGTGTTTATGCTAAGGACCCTATAGGAGAAACCTCTTCGGTTTGTTCTCGTTTTTAGCCTGCATCTTGCATAGGCGTCTGGAGAATCGGTATCCGTAGAGAAGTGTTCCCTTCGGGTGGAACTGCCTGGGGAGACGATAAACTCTTAGCTAGAACAAGTGTGACTTGGAATATCTTTTTA-AGTTGCTTCTAAAAAGACAGATAGGTGAGGCATACGGTGAGTACCGAGTAGGACTTTACATCAT
>Chr04:18574167-18575032:1
AGCCAGCTCCCGTGAAGATACAGTAGCGAAGAGATAAGCAGGAGGCACAGGTGACGCCACCCCTGGCCTCTATAAAAGGAGACGTTGGCCTTCACTCCGGGACACGATTCAGAGAAAGGCTTCCAAGCGCACTCTCACCCTCCATTCCATCTTTCTTAGTAGTAGTTCCTCTAGCCTACCTTGCATAATATATATTGAAGCAAGGAGTTGTAATATAAATGTTTCTAAGGTGAGAAAAACTTGTTTGTATCTACCTTCAGGGTTCCTGAAAGGGAAAACCGTATGTAAGCCTATCTGCTTAATATGAAGTAATTTTCTTTAAGTTTCCCTGTCTGTTTGCTCTAGACAAGCGTTTATGCTAGGGACCCTATAGGAGAAACCTC-TCGGTT-GTTCTCGTTTTTAGCCTGCATCTTGCATAGGCGTCTGGAGAACCAGTATCCGTAGAGAAGTGTTCCCCTCGGGTGGAACTGCCTGGGGAGACGGTAAACGCTTAGCTAGTTCAAATATGACTAGGGATACCTGAAGATGGTTGCTT--AAATAGGCAGATAAGTGAGGCATACGGCTAGTACCGAGTAGGACTTTAAAATTT
>Chr04:18581522-18582414:1
AGCCAGCTCCCGTGAAGATACAGTAGCGAAGAGATAAGCAGGAGGCACAGGTGACGCCACCCCTGGCCTCTATAAAAGGAGACGTTGGCCTTCACTCCGGGACACGATTCAGAGAAAGGCTTCCAAGCGCACTCTCACCCTCCATTCCATCTTTCTTAGTAGTAGTTCCTCTAGCCTACCTTGCATAATATATATTGAAGCAAGGAGTTGTAATATAAATGTTTCTAAGGTGAGAAAAACTTGTTTGTATCTACCTTCGGGGTTCCTGAAAGGGAAAACCGTATGTAAGCCTATCTGCTTAATATGAAGTAATTTTCTTTAAGTTTCCATGTCTGTTTGCTCTAGACAAGCGTTTATGCTAGGGACCCTATAGGAGAAACCTC-TCGGTT-GTTCTCGTTTTTAGCCTGCATCTTGCATAGGCGTCTGGAGAACCAGTATCCGTAGAGAAGTGTTCCCCTCGGGTGGAACAGCCTGGGGAGACGGTAAACGCTTAGCTAGTTCAAATATGACTAGGGATACCTGAAGATGGTTGCTT--AAATAGGTAGATAAGTGAGGCATACGGCTAGTACCGAGTAGGACTTTAAAATTT
>Chr04:21942302-21943269:1
AGCCTGCTCTCGTGAATCCACAGTAGCGAAGAGATAAGCAGGAGGCACAGTCGACGCCACCCCTGACCTCTATAAAAGGAGGGGCCTGCCCA-GCTGAGGGACACCATTCAGAGCAAAGCTTCCAAGCGCGCTCTCACCCTCCATTCCACCGTTCTTAGTAGTAGTGACTTTAGCCTACCTTGCATA--GTATATTGAAGCAAGGAGTTGTGTTATAACGCTGTGTAAGGTAAGAACAGCTTGCTTGTACCTACCTTCGGGTTTCCCGAAAGGGAAAACCGTATGTAAGCTTATCTGTTTAATATGAAGTAATTTTCCTTAAGTATTCCTGCACGTTTGTTCTAGACAAGTGTTTATGCTAAGGACCCTATAGGAGAAACCTCTTCGGTTTGTTCTCGTTTTTAGCCTGCATCTTGCATAGGCGTCTGGAGAATCGGTATCCGTAGAGAAGTGTTTCCTTCGGGTGGAACTGCCTGGGGAGACGATAAACTCTTAGCTAGAACAAGTGTGACTTGGAATATCTTTTTA-AATTGCTTCTAAAAAGACAGATAGGTGAGGCATACGGTGAGTACCGAGTAGGACTTTACATCAT
>Chr05:18266009-18267039:-1
AGCCAGCTC--GTGAAAATACAGTATCTAGAAGATAAGCTTGAAGCACAGTCGA-GCC-TCCCGAGCTCCTATAAAAGGAGGGGTTTGCTCA-GCTGAGAGACACCATTCAGAGCAAAGCTTCCAAGCGTGCTCTCACCCTCCATTCCACCGTTCTTAGTAGTAGTGACTTTAGCCTACCTTGCATA--GTATATTGAAGCAAGGAGGTGTGTTATAACGCTGTGTAAGGTAAGAACAGCTTGCTTGTACCTACCTTCGGGTTTCCCGAAAGTGAAAACCGTATGTAAGCTTATCTGTTTAATATGAAGTAATTTTCCTTAAGTATTCCTGCACGTTTGTTCTAGACAAGTGTTTATGCTAAGGACCCTATAGGAGAAACCTCTTCGGTTTGTTCTCGTTTTTAGCCTGCATCTTGCATAGGCGTCTGGAGAATCGGTATACGTAGAGAAGTGTTCCCTTCGGGTGGAACTGCCTAGGGAGACGATAAACTCTTAGCTAGAACAAGTGTGGCTTGGAATATCTTTTTA-AGTTGCTTCTAAAAAGACAGATAGGTGAGGCATACGGTGAGTACCGAGTAGGACTTTACATCAT
>Chr05:18283177-18284262:-1
AGCCTGCTCTCGTGAATCCACAGTAGCGAAGAGATAAGCAGGAGGCACAAGCGACGCCACCCCTGACCTCTATAAAAGGAGGGGCCTGCCCA-GCTGAGGGACACCATTCAGAGCAAAGCTTCCAAGCGCACTCTCACCCTCCATTCCACCGTTTTTAGTAGTAGTGACTTTAGCCTACCTTGCATA--GTATATTGAAGCAAGGAGTTCTGTTATAACGCTGTGTGAGGTAAGAACAGCTTGCTTGTACCTACCTTCGGGTTTCCCGAAAGGGAAAACCGTATGTAAGCTTATCTGTTTAATATGAAGTAATTTTCCTTAAGTATTCCTGCACGTTTGTTCTAGACAAGTGTTTATGCTAAGGACCCTATAGAAGAAACCTCTTCGGTTTGTTCTCGTTTTTAGCCTGCATCTTGCATAGGCGTTTGGAGAATCGGTATCCGTAGAGAAGTGTTCCCTTCGGGTGGAACTGCTTAGGGAGACGATAAACTCTTAGCTAGAACAAGTGTGATTTGGAATATCTTTTTA-AGTTGCTTTTAAAAAGACAGATAGGTGAGGCATACGGTGAGTACCGAGTAGGACTTTACATCAT
>Chr05:19064689-19063739:-1
AGCCTGCTCTCGTGAATCCACAGTAGCGAAGAGATAAGCAGGAGGCACAGGCGACGCCACCCCTGACCTCTATAAAAGGAGGGGCCTGCCCA-GCTGAGGGACACCATTCAGAGCAAAGCTTCCAAGCGCGCTCTCACCCTCCATTCCACCGTTCTTAGTAGTAGTGACTTTAGCCTACCTTGCATA--GTGTATTGAAGCAAGGAGTTGTGTTATAACGCTGTGTAAGGTAAGAACAGCTTGCTTGTACCTACCTTCGGGTTTCCCAAAAGGGAAAACCGTATGTAAGCTTATCTATTTAATATGAAGTAATTTTCCTTAAGTATTCCTGCACGTTAGTTCTAGACAAGTGTTTATGCTAAGGACCCTATAGGAGAAACCTCTTCGGTTTGTTCTCGTTTTTAGCCTGCATCTTGCATAGGCGTCTGGAGAATCGGTATCCGTAGAGAAGTGTTCCCTTCGGTTGGAACTGCCTGGGGAGACGATAAACTCTTAGCTAGAACAAGTGTGACTTGGAATATCTTTTTA-AGTTGCTTCTAAAAAGACAGATAGGTGAGGCATACGGTGAGTACCGAGTAGGACTTTACATCAT
>Chr06:1712981-1713981:-1
AGCCTGCTCTCGTGAATCCACAGTAGCGAAGAGATAAGCAGGAGGCACAGGCGACGCCACCCCTGACCTCTATAAAAGGAGGGGCCTGCCCA-GCTGAGGGACACCATTCAGAGCAAAGCTTCAAAGCGCGCTCTCACCCTCCATTCCACCGTTCTTAGTAGTGGTGACTTTAGCCTACCTTGCATA--GTATATTGAAGCAAGGAGTTGTGTTATAACGCTGTGTAAGGTAAGAACAGCTTGCTTGTACCTACCTTCGGGTTTCCCGAAAGGGAAAACCATATGTAAGCTTATCTGTTTAATATGAAGTAATTTTCCTTAAGTATTCCTGCACGTTTGTTCTAGACAAATGTTTATGCTAAGGACCCTATAGGAGAAACCTCTACGGTTTGTTCTCGTTTTTAGCCTGCATCTTGCATAGGCGCCTAGAGAATCGGTATCCGTAGAGAAGTGTTCCCTTCGGGTGGAACTGCCTGGGGAGACGATAAACTCTTAGCTAGAACAAGTGTGACTTGGAATATCTTTTTA-AGTTGCTTCTAAAAAGACAGATAGGTGAGGCATACGGTGAGTACCGAGTAGGACTTTACATCAT
>Chr06:10648851-10649764:1
AGCCAGCTCCCGTGAAGATATAGTAGCGAAGAGATAAGCAGGAGGCACAGGCGACGCCATCCCTGGCCTCTATAAAAGGAGACGTTGGCCTTCACTCCGAGACACCATTCAGAGCAAAGCTTCCAAGCGCGCTCTCACCCTCTATTCCATCTTTCTTAGTAGTAGTTCCTCTAGCCTACCTTGCATAATATATATTGAAGCAAGGAGTTGTAATATAAAGGTTTGTAAGGTGAGAAAAACTTGTTTGTATCTACCTTCGGGGTTCCCGAAAGGGAAAACCGTATGTAAGCCTATTTGCTTAATATGAAGTAATTTTCTTTAAGTTTCCCCGTTTGTTTGCTCTAGATAAGCGTTTATGCTAGGGACCCTATAGGAGAAACCTC-TCGGTT-GTTCTCGTTTTTAGCCTGCATCTTGCATAGGCGTCTGGAGAACCAGTATCCGTAGAGAAGTGTTCCCCTCGGGTGGAACTGCCTGGGGAGACGGTAAACGCTTAGCTAGTTCAAATATGACTAGGGATACCTGAAGTTGGTTGCTT--AAATAGGCAGATAAGTGAGGCATACGGCTAGTACCGAGTAGGACTTTAAAATTT
>Chr06:12697189-12698089:1
AGCCAGCTCCCGTGAAGATACAGTAGCGAAGAGATAAGCAGGAGGCACAGGCGATGCCATCCCTGGCCTCTATAAAAGGAGACGTTGGCCTTCACTCCGAGACACCATTCAGAGCAAAGCTTCCAAGCGCGCTCTCACCCTCCATTCCATCTTTCTTAGTAGTAGTTCCTCTAGCCTACCTTGCATAATATATATTGAAACAAGGAGTTGTAATATAAAGGTTTGTAAGGTGAGAAAAACTTCTTTGTATCTACCTTCGAGGTTCCCGAAAGGGAAAACCGTATGTAAGCCTATTTGCTTAATATGAAGTAATTTTCTTTAAGTTTCCCTGTCTGTTTGCTCTAGACAAGTGTTTATGCTAGGGACCCTATAGGAGAAACCTC-TCGGTT-GTTCTCGTTTTTAGCCTGCATCTTGCATAGGCGTCTGGAGAACCAGTATCCGTAGAGAAGTGTTCCCCTCGGGTGGAACTGCCTGGGGAGACGGTAAACACTTAGCTAGTTCAAATATGACTAGGGATACCTGAATATGGTTGCTT--AAATAGGCAGATAAGTGAGGCATACGACTAGTACCGAGTAGGACTTTAAAATTT
>Chr07:1753021-1753961:1
AGCCAGCTCTCATGAAGATACAGTAGCGAAGAGATAAGCAGGAGGCACAGGCGACGCCATCCCTGGCCTCTATAAAAGGAGACGTTGGCCTTCACTCCGGGACACCATTCAGAGCAAAGCTTCCAAGCGCGCTCTCACCCTCCATTCCATCTTTCTTAGTAGTAGTTCCTCTAGCCTACCTTGCATAATATATATTGAAGCAAGGAGTTGTAATATAAAGGTTTGTAAAGTGAGAAAAACTTGTTTGTATCTACCTTCGGGGTTCCCGAAAGGGAAAACCGTATGTAAGCCTATTTGCTTAATATGAAGTAATTTTCTTTAAGTTTCCCTGTTTGTTTGCTCTAGATAAGCGTTTATGCTAGGGACCCTATAGGAGAAACCTC-TCGGTT-GTTCTCGTTTTTAGCCTGCATCTTGCATAGGCGTCTGGAGAACCAGTATCCGTAGAGAAGTGTTCCCCTCGGGTGGAACTGCCTGGGGAGACGGTAAACGCTTAGCTAGTTCAAATATGACTAGGGATACCTGAAGATGGTTGCTT--AAATAGGCAGATAAGTGAGGCATACGGCTAGTACCGAGTAGGACTTTAAAATTT
>Chr07:2821394-2822455:1
AGCCAGCTC--GTGAAAATACAGTATCTAGAAGATAAGCTTGAAGCACAGTCGA-GCC-TCCCGAGCTCCTATAAAAGGAGGGGTTTGCCCA-GCTGAGGGACACCATTCAGAGCAAAGCTTCCAAGCGCGCTCTCACCCTCCATTCCACAGTTCTTAGTAGTAGTGACTTTAGCCTACCTTGCATA--GTATATTGAAGCAAGGAGGTGTGTTATTACGCTGTGTAAGGTAAGAACAGCTTGCTTGTACCTACCTTCGGGTTTCCCGAAAGGGAAAACCGTATGTAAGCTTATCTGTTTAATATAAAGTAATTTTCCTTAAGTATTCCTGCACGTTTGTTCTAGACAAGTGTTTATGCTAAGGACCCTATAGGAGAAACCTCTTCGGTTTGTTCTCGTTTTTAGCCTGCATCTTGCATAGGCGTCTGGAGAATCGGTATCCGTAGAGAAGTGTTCCCTTCGGGTGGAACTGCCTGGGGAGACGATAAACTCTTAGCTAGAACAAGTGTGACTTGGAATATCTTTTTA-AGTTGCTTCTAAAAAGACAGATAGGTGAGGCATACGGTGAGTACCGAGTAGGACTTTACTTCAT
>Chr07:6681259-6682313:-1
AGCCAGCTC--GTGAAAATACAGTATCTAGAAGATAAGCTTGAAGCACAGTCGA-GCC-TCCCGAGCTCCTATAAAAGGAGGGGTTTGCCCA-GCTGAGGGACACCATTCAGAGCAAAGCTTCCAGGCGCGCTCTCACCCTCCATTCCACCGTTCTTAGTAGTAGTGACTTTAGCCTACCTTGCATA--GTATATTGAAGCAAGGAGTTGTGTTATAATGCTGTGTAAGGTAAGAACAGCTTGCTTGTACCTAGCTTCGGGTTTCCCGAAAGGGAAAACCGTATGTAAGCTTATCTGTTTAATATGAAGTAATTTTCCTTAAGTATTCCTGCACGTTTGTTCTAGACAAGTGTTTATGCTAAGGACCCTATAGGAGAAACCTCTTCGGTTTGTTCTCTTTTTTAGCCTGCATCTTGCATAGGCGTCTGGAGAATCGGTATCCGTAGAGAAGTGTTCCCTTCGGGTGGAACTGCCTGGGGAGACGATAAACTCTTAGCTAGAACAAGTGTGACTTGGAATATCTTTTTA-AGTTGCTTCTAAAAAGACAGATAGGTGAGGCATACGGTGAGTACCGAGTAGGACTTTACATCAT
>Chr07:18552416-18551470:-1
AGCCAGCTCCCGTGAAGATATAGTAGCGAAGAGATAAGCAGGAGGCACAGGCGACGCCATCCCTGGCCTCTATAAAAGGAGACGTTGGCATTCACTCCGAGACACCATTCAGAGCAAAGCTTCCAAGCGCGCTCTCACCCTCTATTCCACCTTTCTTAGTAGTAGTTCCTCTAGCCTACCTTGCATAATATATATTGAAGCAGTGAGTTGTAATATAAAGGTTTGTAAGGTGAGAAAAACTTGTTTGTATCTACCTTCGGGGTTCCCGAAAGGGAAAACCGTATGTAAGCCTATTTGCTTAATATGAAGTAATTTTCTTTAAGTTTCCCCGTTTGTTTGCTCTAGATAAGCGTTTATGCTAGGGACCCTATAGGAGAAACCTC-TCGGTT-GTTCTCGTTTTTAGCCTGCATCTTGCATATGCGTCTGGAGAACCAGTATCCGTAGAGAAGTGTTCCCCTCGGGTGGAACTGCCTGGGGAGACGGTAAACGCTTAGCTAGTTCAAATATGACTAGGGATACCTGAAGTTGGTTGCTT--AAATAGGCAGATAAGTGAGGCATACGGCTAGTACCGAGTAGGACTTTAAAATTT
>Chr08:4252460-4253523:-1
AGCCAGCTC--GTGAAAATACAGTATCTAGAAGATAAGCTTGAAGCACAGTCGA-GCC-TCCCGAGCTCCTATAAAAGGAGGGGTTTGCTCA-GCTGAGAGACACCATTCAGAGCAAAGCTTCCAAGCGCGCTCTCACCCTCCATTCCACCATTCTTAGTAGTAGTGACTTTAGCCTACCTTGCATA--GTATATTGAAGCAAGGAGTTGTGTAATAACGCTGTGTAAGGTAAGAACAGCTTGCTTGTACCTACCTTCGGGTTTCCCGAAAAGGAAAACCGTATGTAAGCTTATCTGTTTAATATGAAGTAATTTTCCTTAAGTATTCCTGCACGTTTGTTCTAGACAAGTGTTTATGCTAAGGACCCTATAGGAGAAACCTCTTCCGTTTTTTCTCGTTTTTAGCCTGCATCTTGCATAGGCGTCTGGAGAATCGGTATCCGTAGAGAAGTGTTCCCTTCGGGTGGAACTGCCTGGGGAGACGATAAACTCTTGGCTAGAACAAGTGTGACTTGGAATATCTTTTTA-AGTTGCTTCTAAAAAGATAGATAGGTGAGGCATACGGTGAGTACCGAGTAGGACTTTACATCAT
>Chr08:11334478-11335523:1
AGCTAGCTCTCGTGAATCCACAGTAGCGAAGAGATAAGCAGGAGACACAGGCGACGCCATCCCTGGCCTCTATAAAAGGAGACGTTGGCCTTCACTCCGGGACACCATTCAGAGCAAAGCTTTCAAGCGCGCTCTCACCCTCCATTCCACCGTTCTTAGTAGTAGTGATTTTAGCCTACCTTGCATA--GTATATTGAAGCAAGGAGTTGTGTAATAACGCTGTGTAAGGTAAGAACAGCTTGCTTGTACCTACCTTCGGGTTTCCCGAAAGGGAAAACCGTATGTAAGCTTATCTGTTTAATATGAAGTAATTTTCCTTAAGTATTCCTGCACGTTTGTTCTAGACAAGTGTTTATGCTAAGGACCCTATAGGAGAAACCTCTTCGGTTTGTTCTCGTTTTTAGCCTGCATCTTGCATAGGCGTCTGGAGAATCGGTATCCGTAGAGAAGTGTTCCCTTCGGGTGGAACTGCCTGGGGAGACGATAAACTCTTAGCTAGAACAAGTGTGACTTGGAATATCTTGTTA-AGTTGCTTCTAAAAAGATAGATAGGTGAGGCATACGGTAAGTACCGAGTAGGACTTTACATCAT
>Chr08:21343338-21344359:-1
AGCCTGCTCTCGTGAATCCACAGTAGCGAAGAGATAAGCAGGAGGCACAGGCGACGCCACCCCTCACCTTTATAAAAGGAGGGGCCTGCCCA-GCTGAGGGACACCATTCAGAGCAAAGCTTCCAAGCGCGCTCTCACCCTCCATTCCACCGTTCTTAGTAGTAGTGACTTTAGCCTACCTTGCATA--GTATATTGAAGCAAGAAGTTGTGTTATAACGCTGTGTAAGGTAAGAACAGCTTGCTTGTACCTACCTTCGGATTTCCCGAAAGGGAAAACCGTAAGTAAGCTTATCTGTTTAATATGAAGTAATTTTCCTTAAGTATTCCTGCACGTTTGTTATAGACAAGTGTTTATGCTAAGGACCCTATAGGAGAAACATCTTCGGTTTGTTCTCGTTTTTAGCCTGCATCTTGCATAGGCGTCTGGAGAATCGGTATCCGTAGAGAAGTGTTCCCTTCGGGTGGAACTGCCTAGGGAGACGATAAACTCTTAGCTAGAACAAGTGTGACTTGAAATATCTTTTTA-AGTTGCTTCTAAAAAGACAGATAGGTGAGGCATACGGTGAGTACCGAGTAGGACTTTACATCAT
>Chr08:21351748-21350822:-1
AGCCTGCTCTCGTGAATCCACAGTAGCGAAGAGATAAGTAGGAGGCACAGGCGACGCCACCCCTGACCTCTATAAAAGGAGGGGCCTGCCCA-GCTGAGGGACACCATTCAGAGCAAAGCTTCCAAGCGCGCTCTCACCCTCCATTCCACCGTTCTTAGTAGTAGTGACTTTAGCCTATCTTGCATA--GTATATTGAAGCAAGAAGTTGTGTTATAACGCTGTGTAAGGTAAGAACAGCTTGCTTGTACCTACCTTCGGGTTTCCCGAAAGGGAAAACCGTATGTAAGCTTATCTGTTTAATATGAAGTAATTTTCCTTAAGTATTCCTGCACGTTTGTTTTAGACAAGTGTTTATGCTAAGGACCCTATAGGAGAAACCTCTTCGGTTTGTTCTCGTTTTTAGCCTGCATCTTGCATAGGCGTCTGGAGAATCGGTATCCGTAGAGAAGTGTTCCCTTCGGGTGGAACTGCCTGGGGAGACGATAAACTCTTAGCTAGAACAAGTGTGACTTGGAATATCTTTTTA-AGTTGCTTCTAAAAAGACAGATAGGTGAGGCATACGGTGAGTACCGAGTAGAACTTTACATCAT
>Chr08:25004409-25005372:-1
AGCCAGCTC--GTGAAAATACAGTATCTAGAAGATAAGCTTGAAGCACAGTCGA-GCC-TCCCGAGCTCCTATAAAAGGAGGGGTTTGCTCA-GCTGAGAGACACCATTCAGAGCAAAGCTTCCAAGCGCGCTCTCACCCTCCATTCCACCATTCTTAGTAGTAGTGACTTTAGCCTACCTTGCATA--GTATATTGAAGCAATGAGTTGTGTTATAACGCTGTGTAAGGTAAGAACAGCTTGCTTGTACCTACCTTCGGGTTTCCCGAAAGGGAAAACCGTATGTAAGCTTATCTGTTTAATATGAAGTAATTTTCCTTAAGTATTCCTACACGTTTGTTCTAGACAAGTGTTTATGCTAAGGACCCTATAGGAGAAACCTCTTCGGTTTGTTCTCGTTTTTAGCCTGCATCTTGCATAGGCGTCTGGAGAATCGGTATCCGTAGAGAAGTGTTCCCTTCGGGTGGAACTGCCTGGGGAGACGATAAACTCTTAGCTAGAACAAGTGTGACTTGGAATATCTTTTTA-AGTTGCTTCTAAAAAGATAGATAGGTGAGGCATACGGTGAGTACCGAGTAGGACTTTACATCAT
>Chr08:25128590-25129611:1
AGCCAGCTC--GTGAAAATACAGTATCTAAAAGATAAGCTTGAAGCACAGTCGA-GCC-TTCAGAGCTCCTATAAAAGGAGGGGTTTGCTCA-GCTGAGAGACACCATTCAGAGCAAAGCTTCCAAGCGCGCTCTCACCCTCCATTCCACCGTTCTTAGTAGTAGTGACTTTAGCCTACCTTGCATA--GTATATTGAAGCAAGGAGGTGTGTTATAACGCTGTGTAAGGTAAGAACAGCTTGCTTGTACCTACCTTCGGGTTTCCCGAAAGGGAAAACCGTATGTAAGCTTATCTGTTTAATATGAAGTAATTTTCCTTAAGTATTCCTGCACGTTTGTTCTAGACAAGTGTTTATGCTAAGGACCCTATAGGAGAAACCTCTTCGGTTTGTTCTCGTTTTTAGCCTGCATCTTGTATAGGCGTCTGGAGAATCGGTATCCGTAGAGAAGTGTTCCCTTCGGGTGGAACTGCCTGGGGAGACGATAAACTCTTAGCTAGAACAAGTGTGACTTGGAATATCTTTTTA-AGTTGCTTCTAAAAAGACAGATAGGTGAGGCATACGGTGAGTACCGAGTAGGACTTTACATCAT
>Chr09:1108745-1109847:-1
AGCCAGCTCCCGTGAAGATACAGTAGCGAAGAGATAAGCAGGAGGCACAGGCGACGCCATCCCTGGCCTCTATAAAAGGAGACGTTGGCCTTCACTCCGGGACACCATTCAGAGCAAAGCTTCCAAGCGCGCTCTCACCCTCCATTCCACCGTTCTTAGTAGTAGTGACTTTAGCCTACCTTGCATA--GTATATTGAAGCAAGGAGTTGTGTAATAACGCTGTGTAAGGTAAGAACAGCTTGCTTGTACCTACCTTCGGGTTTCCCGAAAGGGAAAACCGTATGTAAGCTTATCTGTTTAATATGAAGTAATTTTCCTTAAGTATTCCTGCACGTTTGTTCTAGACAAGTGTTTATGCTAAGGACCCTATAGGAGAAACCTCTTCGGTTTGTTCTCGTTTTTAGCCTGCATCTTGCATAGGTGTCTGGAGAATCGGTATCCGTAGAGAAGTGTTCCCTTCGGGTGGAACTGCCTGGGGAGACGATAAACTCTTAGCTAGAACAAGTGTGACTTGGAATATCTTGTTA-AGTTGCTTCTAAAAAGATAGATAGGTGAGGCATACGGTGAGTACCGAGTAGGACTTTACATCAT

#for Fig. 2A
>10_8398922-8399833
ILC-AVKRDDQG--------------------------------R---PLPDRDGNGNPTGNISDALA-------------------------TLIYNIIY-HFAGNY--HDIYEKNREQLINLKCKTMSD--FRWYKDTF-LSKLYTLPEPNQDFW-KEK-------YI-SGLPPLFAEKVSNSLRKEGGGSINYH---YLDIGKITQKIQLVGAELCNDLKIKDQLKKQ---RILGKREMG-DFCYQFGFQDPYVYRKRKTHSKP-MTKPNDKSKMSFQATKRKPKR--IYNKNIRTQDT---------------------ESKETI-----CYKCGLKGHIANRC--FKSKVK-KEIQA------------------------------------LLDSESEDVKEKLEAILNNIDNDSSSDEEKNAEINCCQDSG
>6_16935565-16936476
ILC-AVKRDDQG--------------------------------R---PLPDRDGNGNPTGNISDALA-------------------------TLIYNIIY-HFAGNY--HDIYEKNREQLINLKCKTMSD--FRWYKDTF-LSKLYTLPEPNQDFW-KEK-------YI-SGLPPLFAEKVRNSLRKEGGGSINYH---YLDIGKITQKIQLVGAELCNDLKIKDQLKKQ---RILGKREMG-DFCYQFGFQDPYVYRKRKTHSKP-MTKPNDKSKMSFQATKRKPKR--IYNKNIRTQDT---------------------ESKETI-----CYKCGLKGHIANRC--FKSKVK-KEIQA------------------------------------LLDSESEDVKEKLEAILNNIDNDSSSDEEKNAEINCCQDSG
>11_6585466-6586377
ILS-AVKRDDQG--------------------------------R---PLRDRDGNGNPTGNISDALA-------------------------TLIYNIIY-HFAGNY--HDIYEKNRKQLINLKCKTMSD--FRWYKDTF-LSKLYTLPEPNQDFW-KEK-------YI-SGLPPLFAEKVRNSLRKEEGGSINYH---YLDIGKITQKIQLVGAELCNDLKIKDQLKKK---RILGKREMG-DFCYQFGFQDPYVHRKRKTHSKP-MTKPNDKSKMSFQATKRKPKR--IYNKNIRTQDT---------------------ESKETI-----CYKCSLKGHIANRC--FKSKVK-KEILA------------------------------------LLDSESEDVKEKLEAILNNIDNDSNSDEEKNAEINCCQDSG
>10_6512262-6513161
ILC-AVKRDDEG--------------------------------R---PLPDRDGNGNPTGNISDALA-------------------------TLIYNIIY-HFAGNY--HDIYEKNREQLINLKCKTMSD--FRWYKDTF-LSKLYTLPEPNQDFW-KEK-------YI-SGLPPLFAEKVRNSLRKEGGGSINYH---YLDIGKITQKIQLVGAELCNDLKIKDQLKKQ---RILGKREMG-DFCYQFGFQDPYVYRKRKTHSKP-MTKPNDKSKMSFQATKRKPKR--IYNKNIRTQDT---------------------ESKETI-----CYKCGLKGHIANRC--FKSKVK-KEIQA------------------------------------LLDSESEDVKEKLEAILNNIDNDSSSD----AEINCCQDSG
>12_13435198-13436109
ILC-AVKRDDQG--------------------------------R---PLPDRDGNGNPTGNISDALA-------------------------TLIYNIIY-HFAGNY--HDIYEKNREQLINLKCKTMSD--FRWYKDTF-LSKLYTLPEPNQDFW-KEK-------YI-SGLPPLFAEKVRNSLRKEGGGSINYH---YLDIGKITQKIQLVGAELCNDLKIKDQLKKQ---RILGKREMG-DFCYQFGFQDPYVYRKRKTHSKP-MTKPNDKSKMSFQATKRKPKR--IYNKNIRTQDT---------------------ESKETI-----CYKCGLKGHIANRC--FKSKVK-KEIQA------------------------------------LLDSESEDVKEKLEAILNNIDNDSSSDEEKNAEINCCQDSG
>4_26263637-26264548
ILC-AVKRDDQG--------------------------------R---PLPDRDGNGNPTGNISDALA-------------------------TLIYNIIY-HFAGNY--HDIYEKNREQLINLKCKTMSD--SRWYKDTF-LSKLYTLPEPNQDFW-KEK-------YI-SGLPPLFAEKVRNSLRKEGGGSINYH---YLDIGKITQKIQLVGAELCNDLKIKDQLKKQ---RILGKREMG-DFCYQFGFQDPYVYRKRKTHSKH-MTKPNDKSKMSFQATKRKPKR--IYNKNIRTQDT---------------------ESKETI-----CYKCGLKGHIANRC--FKSKVK-KEIQA------------------------------------LLDSESEDVKEKLEAILNNIDNDSSSDEEKNAEINCCQDSG
>9_2512152-2513073
ILC-AVKRDDQG--------------------------------R---PFPDRDGNGNPIGNISDALA-------------------------TLIYNIIY-HLAGNY--HDIYEKNREQLINLKCKTISD--FRWYKDTF-LSKLYTLPEPNQDFW-KEK-------YT-SGLPPLFAEKVRNSLRKEEGGSINYH---YLDIGKITQKIHLVGAELCDELKIKYQLKKQ---RILGKRELE-DFCYQFGFQDPYVYRKRKTHSKP-MTKPNDKSKMSYQATKRN-KR--IYNRNMRTQDT-----------------EIIRESKETI-----CYKCGLKGHIASRC--FKSKVK-KEIQA------------------------------------LLDSDSEDVKEKLEALLDHIDNDTSSGG-KNAEINCCQDSG
>3_1874114-1874991
ILC-AVKRDDQE--------------------------------R---PFPDRDGNGNPIGNISDALA-------------------------TLIYNIIY-HFAGNY--HDIYEKNREQLINLKCKTISD--FRWYKDTF-LSKLY------------------------SGLPPLFAEKVRNSLRKEWGGSINYH---YVDIGKITQKIQLVGAELCNDLKIKDQLKKQ---RILGKRELG-DFFYQFGFQDPYVYRKRKTHSKP-MTKPNDKSKMSFQA-KKKPKG--IHNRSMRTQDT-----------------KIIRENKETI-----CYKCGLKGHIASRC--FKSKVK-KKIQA------------------------------------LLDSDSEDVK-KLEVLLDHIDNDSSSEGEKNAEINCCQDSG
>4_11090697-11091619
ILC-AVKRDDQG--------------------------------R---PFPDRDGNGNPIGNIFDALA-------------------------TLIYNIIY-HFAGNY--HDIYEKNREQLINLKCKTMSD--FRWYKDTF-LSKLYTLPEPNQDFW-KEK-------YI-SGLPPLFAEKVRNSLRKEGGGSINYH---YLDIGKITQKIQLVGAELCNDLKIKDQLKKQ---RILGKRELG-DFCYQFGFQDPYVYRKRKTHSKP-MTKPNDKNKMSFQATKRKPKR--IYNRDMRTQDT-----------------ELIRENKETI-----CYKCGLKGHIASRC--FKSKVK-KEIQA------------------------------------LLDSDSEDVKEKLEALLDNIDNDSSSEEEKNAEINCCQDSS
>1_8842965-8843877
ILC-AVKRDDQG--------------------------------R---PLPDRDGNGNPTGNISDALA-------------------------TLIYNIIY-HFAGNY--HDIYEKNREQLINLKCKTMSD--FRWYKDTF-LSKLYTLPEPNQDFW-KEK-------YI-SGLPPLFAEKVRNSLRKEGGGSINYH---YLDIGKITQKIQFVGAELCNDLKIKD-LKKQ---RILGKREMG-DFCYQFGFQDPYVYRKRKTHSKP-MTKPNDKSKMSFQATKRKPKR--IYNMNIRTQDT---------------------ESKETI-----CYKCGLKGHIANRC--FKSKVK-KEIQA------------------------------------LLDSESEDVKEKLEAILNNIDNDSSSDEEKNAEINCCQDSG
>9_20416980-20417891
ILC-AVKRDDQG--------------------------------R---PLPDRDGNGNPTGNISDALA-------------------------TLIYNIIY-HFARNY--HDIYEKNREQLINLKCKTMSD--FRWYKDTF-LSKLYTLPEPNQDFW-KEK-------YI-SGLPPLFAEKVRNSLRKEGGGSINYH---YLDIGKITQKIQLVGAELCNDLKIKDQLKKQ---RILGKREMG-DFCYQFGFQDPYVKQDDKTHDKP-MTKPNDKSKMSFQATKRKPKR--IYNKNIRTQDT---------------------ESKETI-----CYKCGLKGHIANRC--FKSKVK-KEIQA------------------------------------LLDSESEDVKEKLEAILNNIDNDSSSDEEKNAEINCCQDSG
>11_8295812-8296723
ILC-AVKRDDQG--------------------------------R---PLPDRDGNGNPTGNISDALA-------------------------TLIYNIIY-HFAGNY--HDIYEKNREQLINLKCKTMSD--FRWYKDTF-LSKLYTLPEPNQDFW-KEK-------YI-SGLPPLFAEKVRNSLRKEGGGSINYH---YLDIGKITQKIQLVGAELYNDLKIKDQLKKQ---KILGKREMG-DFCYQFGFQDPYVYRKRKTQSKP-MTKPNDKSKMSFQATKRKPKR--IYNKNIRTQDT---------------------ESKETI-----CYKCGLKGHIANRC--FKSKVK-KEIQA------------------------------------LLDSESEDVKEKLEAILNNIDNDSSSDEEKNAEINCCQDSG
>2_11307220-11308131
ILC-AVKRDDQG--------------------------------R---PLPDRDGNGNPTGNISDALA-------------------------TLIYNIIY-YFAENY--HDIYEKNREQLINLKCKTMSD--FRWYKDIF-LSKLYTLPEPNQDFW-KEK-------YI-FGLPPLFAEKVRNSQRKEGGGSINYH---YLDIGKITQKIQLVGAELCNDLKIKDQLKKQ---RILGKREMR-DFCYQFGFQDPYVNRKRKTHSKP-RTKPNDKSKMSFQATKRKPKR--IYNKNIRTQDT---------------------ESKETI-----CYKCGLKGHIANRC--FKSKVK-KEIQA------------------------------------LLDSESEDVKEKLETILNNIDNDSCSDEEKNAEINCCQDSG
>10_8406318-8407229
ILC-AVKRDDQG--------------------------------R---PLPDRDGNGNPTGNISDALA-------------------------TLIYNIIY-HFAGNY--HDIYEKNREQLINLKCKTMSD--FRWYKDTF-LSKLYTLPEPNQDFW-KEK-------YI-SGLPPLFAEKVRNSLRKEGGGSINYH---YLDIGKITQKIQLVGVELCNDLKIKDQLKKQ---RILGKREMG-DFCYQFGFQDPYVYRKRKTHSKP-MTKPNDKSKMSFQATKRKPKR--IYNKNIRTQDT---------------------ESKETI-----CYKCGLKGHIANRC--FKSKVK-KEIQA------------------------------------LLDSESEDVKEKLEAILNNIDNDSSSDEEKNAEINCCQDSG
>9_21431082-21431914
------------------------------------------------------GLVNSTGNISDALA-------------------------TLIYNIIY-HFDKNY--HDIYEKNREQLINLKCKTISD--FRWYKDTF-LSKLYTLPEPNQDFW-KEK-------YI-SGLPPLFAKKVRNSLRKEGGGSINYH---YLDIGKITQKIQLVGAELCNDLKIKDQLKKQ---RILGKREMG-DFCYQFGFQDPYVYRKRKTHSKP-MTKPNDKSKMSFQATKRKPKR--IYNKNIRTQDT---------------------ESKETI-----CYKCGLKGHIANRC--FKSKVK-KEIQA------------------------------------LLDSKSEDVKEKLEAILNNIDNDSSSDEEKNAEINCCQDSG
>1_23905982-23906893
ILC-AVKRDDQG--------------------------------R---PLPDRDGNGNPTGNISDALA-------------------------TLIYNIIY-HFAGNY--HDIYEKNREQLINLKCKTMSD--FRWYKDTF-LSKLYTLPEPNQDFW-KEK-------YI-SGLPPLFAEKVRNSLRKEGGGSINYH---YLDIGKITQKIQLVGAELCNDLKIKDQLKKQ---RILGKREMG-DFCYQFGFQDPYVYRKRKTHSKP-MTKPNDKSKMSFQATKRKPKR--IYNKNIRTQDT---------------------ESKETI-----CYKCGLKGHIANRC--FKSKVK-KEIQA------------------------------------LLDSESEDVKEKLEAILNNIDNDLSSDEEKNAEINCCQDSG
>8_25044462-25045373
ILC-AVKRDDQG--------------------------------R---PLPDRDGNGNPTGNISDALA-------------------------TLIYNIIY-HFAGNY--HDIYEKNREQLINLKCKTMSD--FRWYKDTF-LSKLYTLPEPNQDFW-KEK-------YI-SGLPPLFAEKVRNSLRKEGGGSINYH---YLDIGKITQKIQLVGAELCNDLKIKDQLKKQ---RILGKREMG-DFCYQFGFQDPYVHRKRKTHSKP-MTKPNDKSKMSFQATKRKPKR--IYNKNIRTQDT---------------------ESKETI-----CYKCGLKGHIANRC--FKSKVK-KEIQA------------------------------------LLDSESEDVKEKLEAILNNIDNDSSSDEEKNAEINCCQDSG
>3_22475740-22476651
ILC-AVKRDDQG--------------------------------R---PLPDRDGNGNPTGNISDALA-------------------------TLIYNIIY-HFAGNY--HDIYEKNREQLINLKCKTMSD--FRWYKDTF-LSKLYTLPEPNQDFW-KEK-------YI-SSLPPLFAEKVRNSLRKEGGGSINYH---YLDIGKITQKIQLVGAELCNDLKIKDQLKKQ---RILGKREMG-DFCYQFGFQDPYVYRKRKTHSKP-MTKPNDKSKMSFQATKRKPKR--IYNKNIRTQDT---------------------ESKETI-----CYKCGLKGHIANRC--FKSKVK-K-IQA------------------------------------LLDSESEDVKEKLEAILNNIDNDSSSDEEKNTEINCCQDSG
>1_34123480-34124392
ILC-AVKRDDQG--------------------------------R---PLPDRDGNGNPTGNISDALA-------------------------TLIYNIIS-HFAGNY--HDIYKKNREQLINLKCKTMSD--FRWYKDTF-LSKLYTLPEPNQDFW-KEK-------YI-SGLPPLFAEKVRNSLRKEGGGSINYH---YLDIGKITQKIQLVGAELCNDLKIKDQLKKQ---RILGKREMG-DFCYQFGFQDPYVYRKRKTHSKP-MTKPNDKSKMSFQATKRKPKR--IYNKNIRTQDT---------------------ESKETI-----CYRCGLKGHIANRC--FKSKVK-KEIQA------------------------------------LLDSESEDVKEKLEAILNNIDNDSSSDEEKNAEINCCQDSG
>7_36900695-36901617
IIE-AVKIDENG--------------------------------R---PIVLTND-GQSLGSVSDAIS-------------------------TLLYNIVY-HFAGNY--QDIYEKNREQLINLRCKTMTD--FRWYKDSF-LSKLYTLPDPNQDFW-KEK-------YI-SGLPPLFAEKVRNSLRKEGEGSINYQ---NLDIGKITQKIQLVGAELCNDLKIKEQLKKQ---RAIGKKELG-EFCYQFGFQDPFESQRRRSHRDH-KRNYDDNKKAKHPMRRRHKKK---YDTGNVFKNF-----------------KKDHKANDLV-----CFKCGQKGHKSSNC--FKSKVK-QEIQA------------------------------------LLESDSEDIKGRLGEILNHIQSDDSS--EDNTEINCCENNE
>5_47932677-47933590
IIE-AVKIDENG--------------------------------R---PIVLTNDQGQSLGSVSDAIS-------------------------TLLYNIVY-HFAGN---QDIYEKNREQLISLRCKTMTD--FRWYKDSF-LSKLYTLPDPNQDFW-KEK-------YI-SGLPPLFAEKVRNSLRKEGEGSINYQ---NLDIGKITQKIQLVGAELCNDLKIKEQLKKQ---RAIGKKELG-EFCYQFGFQDPFESQRRRSHRDH-KRNYDDNKKAKHPMRRRHKKK---YDKGNVFKNF-----------------KKEHKANDLV-----CFNCGKKGHKSSNC--FKSKVK-QEIQA------------------------------------LLESDSEDIKERLGEILNHIQSDDSS--EDNTEINCCENNE
>5_13016279-13017193
IIE-AVKIDENG--------------------------------R---PIVLTNDQGQSLGSVSDAIS-------------------------TLLYNIVY-HFAGNY--QDIYEKNREQLISLRCKTMTD--FRWYKDSF-LSKLYTLPDPNQDFW-KEK-------YI-SGLPPLFAEKVRNSFRKEGEGSINYQ---NLDIGKITQKIQLVGAELCNDLKIKEQLKKQ---RAIGKKELG-EFCYQFGFQDPFESQRRRSHRDH-KRNYDDNKKAKHPMRRRHKKK---YDTGNVFKNF-----------------KKGHKANDLV-----CFNCGQKGHKSSNC--FKSKVK-QEIQA------------------------------------LLESDSEDIKGRLGEILNHIQSDDSS--EDNTEINCCENNE
>5_58538795-58539703
IIE-AVKIDENG--------------------------------R---PIVLTNDQGQSLGSVSDAIS-------------------------TLLYNIVY-HFAGNY--QDIYEKNREQLISLRCKTMTD--FRWYKDSF-LSKLYTLPDPNQDFW-KEK-------YI-SGLPPLFAEKVRNSLRKEGEGSINYQ---NLDIGKITQKIQLVGAELCNDLKIKEQLKKQ---RAIGKKELG-EFCYQFGFQDPFESQRRRSHRDH-KRNYD--KKAKHPMRRRHKKK---YDTGNVFKNF-----------------KKEHKANDLV-----CFNCGKKGHKSSNC--FKSKVK-QEIQA------------------------------------LLESDSEDIKERLGEILNHIQSDDSS--EDNTEINCCENNE
>5_58532258-58533172
IIE-AVKIDENG--------------------------------R---PIVLNNDQGQSLGSVSNAIS-------------------------TLLYNIVY-HFAGNY--QDIYEKNREQLISLRCKTMTD--FRWYKDSF-LSKLYTLPDPNQDFW-KEK-------YI-SGLPPLFAEKVRNSLRKEGEGSINYQ---NLDIGKITQKIQLVGAELCNDLKIKEQLKKQ---RAIGKKELG-EFCYQFGFQDPFESQRRRSHRDH-KRNYDDNKKAKHPMRRRHKKK---YDTGNVFKNF-----------------KKDHKANDLV-----CFNCGQKGHKYSNC--FKSKVK-QEIQA------------------------------------LLESDSEDINGRLGEILNHIQSDDSS--EDNTEINCCENKE
>5_13713541-13714427
IIE-AVKIDENG--------------------------------R---PIVLTNDQGQSLG-AIS----------------------------TLLYNIVY-HFAGNY--QDIYEKNREQLINLRCKTMTD--FRWYKDSF-LSKLYTFPDPNQDFW-KEK-------YI-SGLPPLFAKKVRNSLRKEGEGSINYQ---NLDIGKITQKIQLVGAELCNDLKTKE-LKK---------KELG-EFCYQFGFQDPFESQRRKSHRDH-KRNYDDNKKAKHPMRRRHKKR---YDTGNVFKNF-----------------KREHKANDLV-----CFNCGQKGH-SSNC--FKSKVK-QEIQA------------------------------------LLESDSEDIKERLGEILNHIQSDDGS--EDNTEINCCENNE
>5_33534571-33535478
IIE-ADKIDENG--------------------------------R---PIVLTNDQGQ-LGSVSDAIS-------------------------TLLYNIVY-HFAGNY--QDIYEKNREQLINLRCKTMTD--FRWYKDSF-LSKLYTLPDPNQDFW-KEK-------YI-SGLPPLFAEKDRNSLRKEGEGSINY----NLDIGKITQKIQMVGAELCNDF--KEQLKKQ---RAIGKKELG-EFCYQFGFQDPFESQRRSSHRNH-KRNYDDNKKGKHPMRRRHKRI---YNKENMFKNF-----------------KREHKANDLV-----CFNCGQKGHKSSNC--FKSKVK-QEIQA------------------------------------LLVSESEDIKERLGEILKHIQSDDDS--EDNTEINCYENNE
>6_44427308-44428215
IIE-AVKIDENG--------------------------------R---PIVLTNDQGQSLGSVSDAIS-------------------------TLLYNIVY-HFAGNY--QDIYEKNREQLISLRCKTMTD--FRWYKDSF-LSKLYTLSDPNQDFW-KEK-------YI-SGLPPLFAEKVRNSLRKEGEGSINYQ---NLDIGKITQKIQLVGAELCNDLKIKEQLKKQ---RAIGK-ELG-EFCYQFGFQDPFESQRRRSHRDH-KRNYD--KKAKHPMRRRHKKK---YDTGNVFKNF-----------------KKEHKANDLV-----CFNCGQKGHKSSNC--FKSKVK-QEIQA------------------------------------LLESDSEDIKGRLGEILNHIQSDDSS--EDNTEINCCENNE
>7_36894557-36895466
IIE-AVKIDEDG--------------------------------R---PIVLTNNQGQSLGSVSDAIS-------------------------TLLYNIVY-HFAGNY--QDIYEKNREQLINLRCKTMTD--FRWYKDSL-LSKLYTLPDPNQDFW-KEK-------YI-SGLPPLFAEKVRNSLRKEGEGSINYQ---NLDIGKITQKIQLVGAELCNDLKIKEQLKKQ---RAIGKKELG-EFCYQFGFQDPFESQ--RSHRDH-KRNYDDNKKAKHPMRRRQKKK---YDTGNVFKNF-----------------KKDHKANDLV-----CFNCGQKGHKSSNC--FKSKVK-QEIQA------------------------------------LLESDSEDIKGRLGEILNHIQSDDSS--EDNTEINCCENNE
>4_46233018-46233932
IIE-AVKIDENG--------------------------------R---PIVLTNDQGQSLGSVFDAIS-------------------------TLLYNIVY-HFAGNY--QDIYEKNREQLINLRCKTMTD--FRWYKDSF-LSKLYTLPDPNQDYW-KEK-------YI-SGLPPLFAEKVRNSLRKEGEGSINYQ---NLDIGKITQKIQLVGAKFCNDLKIKEQLKKQ---RAIGKKELG-EFCYQFGFQDPFESQRRRSHRDH-KRNSDDNKKAKHPMRRRHKKR---YDTGNVFKNF-----------------KRKHKVNDLV-----CFNCGQKGHKSSNC--FKSKVK-QEIQA------------------------------------LLESDSEDIKERLGEILNHIQSDDGS--EDNSEINCCENNE
>5_13009378-13010290
IIE-AVKIDENG--------------------------------R---PIVLTNDQGQSLGSVSDAIS-------------------------TLLYNIVY-HFAGNY--QDIYEKNREQLISLRCKTMTD--FRWYKDSF-LSKLYTLPDPNQDFW-KEK-------YI-SGLPPLFAEKVRNSLRKEGEGSINYQ---NLDIGKITQKIQLVGAELCNDLKIKEQLKKQ---RAIGKKELG-EFCYQFGFQDPFESQRRRSHRDH-KRNYDDNKKEKHPVRRRHKKK---YDTGNVFKNF-----------------KKGHKANDLV-----CFNCGQKGHKSSNC--FKSKVK-QEIQA------------------------------------LLESDSEDIKGRLGEILNYIQSDDSS--EDNTEINCCENDE
>6_37583753-37584665
IIE-AVKIDENG--------------------------------R---PIVLTNDQGQSLGSVSDAIS-------------------------TLLYNIVY-HFAGNY--QDVYEKNREQLISLRCKTMTD--FRWYKDSF-LSKLYTLPDPNQDFW-KEK-------YI-SGLPPLFAEKVRNSLRKEGEGSINYQ---NLDIGKITQKIQLVGAELCNDLKIKEQLKKQ---RAIGKKELG-EFCYQFGFQDPFESQRRRSHRDH-KRNYDDNKKAKHPVRRRHKKK---YDTGNVFKNF-----------------KKGHKANDLV-----CFNCGQKGHKSSNC--FKSKVK-QEIQA------------------------------------LLESDSEDIKGRLGEILNYIQSDDSS--EDNTEINCCENNE
>3_290133-291043
IIE-AVKIDENG--------------------------------R---PIVLTNDQGQSLGSVSDAIS-------------------------TLLYNIVY-HFAGNY--QDIYEKNREQLISLRCKTMTD--FRWYKDSF-LSKLYTLPDPNQDFW-KEK-------Y--SGLPPLFAEKVRNSLRKEGEGSINYQ---NLDIGNITQKIQLVGAELCNDLKIKEQLKKQ---RAIGKKELG-EFCYQFGFQDPFESQRRRSHRDH-KRNYDDNKKAKHPMRRRHKKK---YDTGNVFKNF-----------------KKGHKANDLV-----CFNCGQKGHKSSNC--FKSKVK-QEIQA------------------------------------LLESDSEDIKGRLGEILNHIQSDDSS--ENNTEINCCENNE
>Super19_791933-792838
IIE-AVKIDENG--------------------------------R---PIVLTNDQGQPLGSVSDAIS-------------------------TLLYNIVY-HFAGNY--QDIYEKSREQLINLRCKTMTD--FRWYKDSF-LSKLYTLPDPNQDFW-KEK-------YI-SGLPPLFAEKVRNSLRKEGEGSINYQ---NLDIGKITQKIQLVGAELCNDLKIKEQLKKQ---RAIGK-ELG-EFCYQFGFQDPFESQRRRSHRDH-KRNYD--KKAKHPMRRRHKKK---YDTGNVFKNF-----------------KKEHKANDLV-----CFNCGQKGHKSSNC--FKSKVK-QEIQA------------------------------------LLESDSEDIKGRLGEILNHIQSDDSS--EDNTEINCCENNE
>7a_39593523-39594368
--------------------------------------------------VLINDHGQSLGTISDAIS-------------------------TLLYNIVY-HFAGNY--EDIYEKNREQLINLRCKTMSD--FRWYKDYF-LSKLYTLLDPNQDFW-KKI-------YI-SGLPPLFAQKVRNSLRKEGEGSINYQ---ELDIAKITQRIQMVGAELCNDLKIKERLIKQ---KTIGKRELG-DFYYQFGVQNPYESSKRGSHRK--HRGNQENNKRVRQPIRRKRQNNNTYNKESASKLF-----------------KRETKPNVLV-----WFKCGQKGHKASTC--FKSTVK-QEIQA------------------------------------LLQLDSENIKEKLGQILNHIHSDTG---FDNEELNCCKNSE
>Contig04516_9130-9955
IIE-VVKIDNNG--------------------------------R---PIVLTNDQGQSLE-VSNAIS-------------------------TLLYNIVY-HFAGNY--QDIYEKNREQLINLRCKTMSD--FRWYKDYF-LSKLYTLPDPNQDSW-KEK-------YI-P-SPPLFVEKVRNSLRKEGEGSINYQ---GLDIVKITQKIQMVGA----------------------------DFCYQFGFQDPYKNSKRSSHRKHRGNHENNKRVRQPIRKKRHNKN--TYNKESASKLF-----------------KRETKPNDLV-----CFKCGQKGHKASTC--FKTKMK-QEIQA------------------------------------LLESDSESIKEKLGEILNHIHSDTG---SDNEELNCCENSE
>eRTBVL-A1
LWE-QWVEKNPN--------------------------------N----YEELKRAGSNPHNFANIVS-------------------------NIII-----AEDPELGYTTLQNERLKEIEKLTLTSWKG--IKEFSQHY-LYNATTAKQGYNKGI-VER-------YF-NKLPDPLGSMIFEEYKKETEGA-------EINISQAITFVFKQLRKICTGIQAQRSMKHS---DYNFCNKII-QIPLSYGEDRPRNKRNHRYQSRNXNNIKTKKRYFLRRSDNRAPFL--HKRNVRRYNPK-------------------KTYDKTCR-----CFICNSPDHLSRTC--PNKDQKRYSSKYEEQ---------------------------------ERVLIIDSVNENILVCDDEIKDDE----SIYSIIETDEIEN
>eRTBVL-A2
LWE-QWVEKNPN--------------------------------N----YEELKRAGSNPHNFANIVS-------------------------NIII-----AEDPELGYTTLQNERLKEIEKLTLTSWKG--IKEFSQHY-LYNATTAKQGYNKGI-VER-------YF-NKLPDPLGSMIFEEYKKETEGA-------EINISQAITFVFKQLRKICTGIQAQRSMKHS---DYNFCNKII-QIPLSYGEDRPRNKRNHRYQSRNXNNIKTKKRYFLRRSDNRAPFL--HKRNVRRYNPK-------------------KTYDKTCR-----CFICNSPDHLSRTC--PNKDQKRYSSKYEEQ---------------------------------ERVLIIDSVNENILVCDDEIKDDE----SIYSIIETDEIEN
>eRTBVL-B
LWE-QWVEKNPN--------------------------------N----YEELKRAGSNPHNFANVIS-------------------------NIII-----AEDPELGYTTLQNERLKEIEKLTLTSWKG--IKEFSQHY-LYNATTAKQGYNRGI-VER-------YF-NKLPDPLGSMIFEEYKKETEGA-------EINISQAITFVFKQLRKICTGIQAQRSMKHS---DYNFCNKIV-QIPLSYGEDKPRSKRIYKHQNRNNNNIRTKKRYFLRRSDNRAPFL--HKRNVRRYNPK-------------------KTYDKTCR-----CFICNSPDHLSRTC--PNKDQKRYSSKYEEQ---------------------------------ERVLIIDSVNENILVCDDEIKDDE----SIYSIIETDEVET
>eRTBVL-C
LWE-QWVEKNPN--------------------------------N----YEELKRAGSNPHNFANVIS-------------------------NIII-----AEDPELGYTTLQNERLKEIEKLTLTSWKG--IKEFSQHY-LYNATTAKQGYNRGI-VER-------YF-NKLPDPLGSMIFEEYKKETEGA-------EINISQAITFVFKQLRKICTGIQAQRSMKHS---DYNFCNKIV-QIPLSYGEDKPRSKRIYKHQNRNXNNIRTKKRYFLRRSDNRAPFL--HKRNVRRYNPK-------------------KTYDKTCR-----CFICNSPDHLSRTC--PNKDQKRYSSKYEEQ---------------------------------ERVLIIDSVNENILVCDDEIKDDE----SIYSIIETDEVET
>eRTBVL-X
LWE-QWVEKNPN--------------------------------N----YEELKRAGSNPHNFANVVS-------------------------NIII-----AEDPELGYTTLQNERLKEIEKLTLTSWKG--IKEFSQHY-LYNATTAKQGYNRGI-VER-------YF-NKLPDPLGSMIFEEYKKETEGA-------EINISQAITFVFKQLRKICTGIQAQRSMKHS---DYNFCNKIV-QIPLSYGEDKPRSKRIYKHQNRNHNNIRTKKRYFLRRSDNRAPFL--HKRNVRRYNPK-------------------KTYDKTCR-----CFICNSPDHLSRTC--PNKDQKRYSSKYEEQ---------------------------------ERVLIIDSVNENILVCDDEIKDDE----SIYSIIETDEVET
>eRTBVL2
LWE-QWVEKNPN--------------------------------N----YEELKRAGSNPHNFANVVS-------------------------NIII-----AEDPELGYTTLQNERLKEIEKLTLTSWKG--IKEFSQHY-LYNATTAKQGYNRGI-VER-------YF-NKLPDPLGSMIFEEYKKETEGA-------EINISQAITFVFKQLRKICTGIQAQRSMKHS---DYNFCNKIV-QIPLSYGEDKPRSKRIYKHQNRNHNNIRTKKRYFLRRSDNRAPFL--HKRNVRRYNPK-------------------KTYDKTCR-----CFICNSPDHLSRTC--PNKDQKRYSSKYEEQ---------------------------------ERVLIIDSVNENILVCDDEIKDDE----SIYSIIETDEVET
>Rice tungro bacilliform virus NP_056762.1
LVQ-DWISKNQA--------------------------------A----YNDIKSRGDRPENFVKMVK-------------------------DRFLI----EDPTDERRTALQRLAQRELEALNCEDPTK--IQPFMAEY-LKKASEAKKGFDVVY-VER-------LF-DRLPEAVGKVVKADFVKDGNSY-------EAGIGIAVSYISTWMRAKCIKETEAKTQKKA-----------SLAFCRSIYTIGDYKKRKILKR----VTNYNKNRRKNYV---RRPSI-----------------------------------KKKCR-----CYICQDENHLANRC--PRRYTNQARASL------------------------------------I-----DGLDEDIVSIASDDEDIE----NFLEIIELDEFIA
>Petunia vein clearing virus NP_127504.1
WWN-SVGPDDKN--------------------------------R-------------FLTSQDFTWN----------------------------IRILYSYFCGDQ--SQNKEELRRQIFEMKCLSYDR--KKIDRHFQRMIKLFYHIGGDISL--KQA-------FI-SSLPPILSERISALIKERGTSVT------QMHVGDIRQTAFYVLDDLCSKRKFFNQMKKMSRDLEKACTKSDLIIKGDKGCSGYCNPSRRRK-----YKRFKLPSFKERDGRQYRKRR-RFFRRSKTSKAM---------------------RQKPRS-----CFTCGKIGHFSRNC--PQNKKSIKLISE------------------------------------IQKYTGIDIEDDLESVFS--IEDEPSEDTLFSLEFYEEYA-
>Commelina yellow mottle virus NP_039820.1
IFV-SWRMRFKD--------------------------------E----YQNLAKIANQDGGTQAIL--------------------------SQIRRIFL-GEDPVLGQNTVQNIAFRKLKQLVCPNYQS--IRRYLMDY-----LTLAAETGLMWSETEGPAISEELF-TKMPAAIGERVAQAYKIMDPTS-------AVNLPSRVYFTINYLTEQCKEASYMRSLKAL-------------DFCRDFPIEGYYGRSGEKK-------KYTARKATKYTGKAHDNHI-------RVTKAK---------------------YQRKCK-----CYICGQEGHYANQC--RNKHKDQQRVAI------------------------------------LQ---SLDLKENEEVVSADDKEEE--DDEIFSVLGEEDYQE
>Banana streak GF virus YP_233107.1
AFM-TWRMKYLP--------------------------------E----FEALKAAALGNNGTQNIL--------------------------NQIRMIFF-LENPKVGTTDEQDAAYKTIKSLVCNEMTDKAVYRYMNDY-----FHLASKSGRMWANEE---LSTEFF-TKLPRHLGDKVEKAFKERHPTN-------SIGVTARIAFTRNYLKDMCQEALFQSQLKKM-------------NFCGNTPVHGIYGKNKEGG-----FRKYGVRKNTSYKGKPHKSHI--RIGKQKHLNLR----------------------KKDCK-----CFACGETGHYASEC--TNPKKFTHRVAI------------------------------------LE---SLDLQEGLEVVSVGMDESDVS--DIYSISENEDNHQ
>Blueberry red ringspot virus NP_395468.1
VVF-NYIVDIDI--------------------------------P----NISSMKNLEILEEIATKIY-------------------------QEFLGGMS-TQRATAADKHDQERVKYILHKMKICDMCE--FEEFYCQF-IHYYYMLESRERTEY-MNV-------FI-QKLPYPLSKTINDEFQSQKNANLIP----DTIRRYSQSNKSIHILLQCTKEQEKMQLINV---T-KCCPKFE-YIPHKFGCSPNSSFRRGRKRTKPKYSKYKQRKYHTFKP--WYKKK-RYRMYKRKYQPKYKQRYWKNKS----NQKYCPKGKKDCK-----CWICQEDGHYANEC--PNKDKRRDKVKL------------------------------------LE----QLSQVNLEPIENDNISEE----ELWYLQTDEESEE
>Tobacco vein clearing virus NP_569139.1
WLH-NLTKESID--------------------------------T---LRSNKKFNGDMATTSMEILYKYE----------------------IAIRNEFSSMTTETEEQHKEKQINRNLMTKLAICNMCY--IDEYTCAF-REYYYKGTYNTEEGREIRK------LYF-TKLPEPFSSKIIKDWNEAGL---------TDTLGARIKFLQQWFVQLCEKYKEEIKMEKILIKNLKCCKN---KTAPQFGCTDKYNKKWKTK-------KYKKHRSKYKYKKPRKRYYVKNYQAKKPFRPK--------------------KKLTECT-----CYNCGKLGHIAKDCKAPKNPKKKQITEI------------------------------------IID---DEEYMQMEYIDYELDSED----SIYEISDSDDEID
>Cassava vein mosaic virusNP_056846.1
WYK-NLTNEAKQ---------------------------------------KLEGNAPLLSLTHMELGL------------------------RAEFGKLG-IESDVEKHEKKTSIARHKILQLQICSMDHQNLNAYLCEF-QEYYYSANYTEAESENILN-------MFYSKLPEPWGQQVLNGYLSEIKGKNL-----LDSIGARMTYLQEFISDKCKENWTQKQARKIQLSKNLDCSY---YEVGKYGCKQIRPHKRKRY-----YKKYIPIKRKYFNKKRYKK----YYRPKKFLKRK--------------------NPHKACK-----CYNCGEEGHISPNCKKPKKKTRINNLEA------------------------------------LEFKNTEMENLEFETNKNDIIWVE----EIEVIQPLHYEEE
>Cauliflower mosaic virus NP_056727.1
IAK-ELIRNTRW--------------------------------N--------RTTGDIIEQVIDAMY-------------------------TMFLGLNY-SDNKVAEKIDEQEKAKIRMTKLQLCDICY--LEEFTCDY-EKNMYKTELADFPGY-INQ-------YL-SKIP-IIGEKALTRFRHEANGTS------IYSLGFAAKIVKEELSKICDLSKKQKKLKKF---NKKCCSIG--EASTEYGCKKTSTKKYHKK-------RYKKKYKAYKPYKKKKKFRSGKYFKPKEKKGS--------------KQKYCPKGKKDCR-----CWICNIEGHYANEC--PN-RQSSEKAHI------------------------------------LQ----QAEKLGLQPIEEPYEGVQ----EVFILEYKEEEEE
>Figwort mosaic virus NP_619547.1
IAK-SFIKQATW--------------------------------D------ILITPEKIIEEVLTGFY-------------------------TMFIGLDY-ALSAEKEEEKRIKKAEELLIKSQLCNICE--LDNFTCFY-EKQINQLKFEDFPKW-IEL-------YL-GKIP-IIGKQSKERWDNEKSFTT------KYSLAFAKRIIQEEIAKYCDFQRTSKKLKNF---SKKCCSKNSLDPLVSFGCRDTKKKDFKKS------SKYKAYKKKKTLKKLWKKKK-RKFTPGKYFSKK---------K----PEKFCPQGRKKCR-----CWICTEEGHYANEC--PNRKSHQEKVKI------------------------------------LI----HGMNEGYYPLEDAYTGNL----EVFSMEIIEETTS
>Strawberry vein banding virus NP_043932.1
LLE-SLHTEAFK--------------------------------Q------ASTTGEEFLTTLTNSFY-------------------------TIFVGTNY-LTQGTREKEKAVQEARNRLVKLQICNLCS--LESFFCDY-ETNLLKLPIEEWPKY-IEE-------YI-RKIP-FVGMEVLEEYSKQDSIT-------KGSLGYAHNLIKAYMEKKCKSLKIKKEIRRN-----MCCPKFS-SPETQYGCKPISHKKAKKQK----YKQYYKKKYRLRKPKRWTNSR-RKYSGRKLFRRKRDQKEETSQQSPEEKKKFCPQGKTTCR-----CWICNEIGHFAKDC--RNKSANHNKIIE------------------------------------------ELQSLQLEPV---FDLNELKIEEKFWELKEVSES-
>Peanut chlorotic streak virus NP_042512.1
VLA-DWAQNTQI--------------------------------PFPQGLTGSETTAEAKLQYLNRYA-------------------------QEIFSEFI-GYGPDEARKEDKPNIIRILSNMKLCDPCY--IENFFCQV-EANYYKVT--DRTGL-LDI-------VL-SKMPPPMVTYIQTQINDPSRTRR------ILTLGLIRRFAIEYRQNLCLRKIEKNYIRNV---DPKCCKQLD-DVPQEYGCSQPYRYKKKRK-------PFRRIKARKYPYRKWKPKYRYKVRRKGYSKQQ---------N----KQKTCPRGKKTCR-----CWICQEEGHYANEC--PNRKINQKKDKY------------------------------------VR----MLYSVGYEPIEEDYETDESLDFDIYSLTSETDSET
>Soybean chlorotic mottle virus NP_068728.1
YLS-NLPSEVLS--------------------------------R----------IPADRKQVDDWVY-------------------------NLLLREFVGRLERPESEEAFSQNNYYKLINLEICNMCY--LENFLCEF-QSRYYGINPIDRENLKVDL-------LLYAKLPEYVRTQVEAYFNASITSNKL-----DNTLGGRITALKLWQTEQCNQKLAKRQASVG-----LCCSKIE-DKIGKYGCRKSNPRAKKPKKKFRKIKKYPKKNFWKWNNQRKKK----TFRKKRPFRKQ----------------QTCPTGKKKCQ-----CWLCHEEGHYANEC--PKK--DNKKAQT------------------------------------LK----LIFDLGFEPVESDIETDE----ELFELTSEDSSED
>RIRE3 AB014738.1
WLH-AVGKKLDT--------------------------------VQCNDKEKVIFATHQLQGPASLWWDYFQA--------------TQPEGQPITWARFTAAFRRTHVPAGVVALKKREFRELKQGNRS---VMEYLHEFNNLARYAPEDVREDEEKQEK-------FL-AGMDPELSVGLVSGDYPDFQRLVDK----SIRLEAKHKELESHKRRLANFRNQQGANQRV-------------RYTNPYPGGSSSQQQQQQQ------QQSRPAPRPQFVVRVPQPQQQQNQQGTRAPRPP---------T----PAVQPVQGRRDASGPQRLCFNCFEPGHFADKC--PKPRRQQGQAPPRPNNGGKDVI-----------------------RGRVNHVTAEDVLTTPDFIVGTFLVHSIPATILFDSGASHSFIS
>RIRE7 BAA89466.1
FACHDFPENKRV--------------------------------R---------AATSEFTDFASIWWSEFVR--------------SNPNNTPQTWDAMKRVMRARFVPSYHARDLLHKLQQLRQGNKS---VEEYYQAL-QIGMLRCGLVENDDAGMAR-------FM-GGLNREIQDILAYKEYNSINRLFHLACKAEREVQGRRASFRTNISAGCASSWTSSNAA---------------APSTRAAAPSCSSNKLRPSTTNSTPCPSEPTRGVAATPSKSSSSV------------------------------ASSGRTRDIQ-----CLRCKGYGHVRKDC--PSTRVMIVRADG----------------------------------GYYFDSDLDEETYALLATNNAGEGDAPHQDEEHIRAEAAEHYE
>Dagul ABA99634.1
WLK-DVDRKLNL--------------------------------VQCTPVEKTLYASHQLRGPAADWWENYCN--------------AHPEPTNIAWDEFAAAFRAAHVPESTIDMKKEEFNRLKQGHSS---VNEYLSQFNKLARYAPEEVNTDKKKIRK-------FL-KGIAVGMRLQLLAHDFPTFQHMINKA---LLLEDARKEATEEYKKRKSNH---QGNSSRG-------------APRPRYGQPMQYHQSVTQTNRQPGYAPRPQINRPAPQPQKHAPSGNTAPNSVTSFKSP--------------------QGPSAVQ-----CFRCNQMGHYARQC--PQNPTNTNSGHANGSTARTPTPAAAQSRPNSQASGQGSRASNHFGRGRVNHIQAETAQDAPDVVMGMFSVNSVPAIVLFDSGASHSFIS
>RIRE8 ABA97812.1
WLH-AVEKKLDL--------------------------------IQCTEQEKVSFASHQLHGPAAEWWDHFRQ--------------GRAEGEPITWQEFTAAFKKTHIPAGVVALKKREFRALNQGSRS---VTEYLHDFNRLARYAPEDVRTDEERQEK-------FL-EGLNDELSYALMSTDFRDFQQLVDK----AIRQEDKYNRMEQKKRRAAQFKAQQGSNQRP---RLVIGPQ---APSYPQGGSSSVIRPQRQFYNNNTGNRGNDNRNVVARPAATPAQN-------QPVRKE--------------------QGSKPVV-----CFNCGDPGHYADKC--PKPRRVKNAPAPNNSNVPVPKAR-------------------------VNHVVAAEAQNAPYVVLGTFPVNSIPATVLFDSGATHSFLS
>Tma AAC26240.1
LLR-QLLERLPGVVLVQAPVAPRVTEVQQRAAVAEEVPSYLRMMEQLQRIGTRYFSGGTSPEEADNWRLRVERNFGSSRCPGSIGVTARRRQADMSWADFVVEFNAKYFLKEALDRMEARFLELKQGERS---VREYDREFNRLLAYAGRGMEDDQAQMRK-------FL-RGLRT------------------------DLRVRCRVSQYATKAALVETAAEVEEDLQRQ-----------------VVGVSPAVQPKKTQQQ----MTPSKGGKPATEQKRKWDHPS---------------------------------RAGQGCRAG---CFSCGSLDHKVADC--TQRAETRECYHCRERGYLHVK---------------------------VAGGQVLAVLGRAKGVDIQIAGESMPADLIISLVELYD---

#for Fig. 2B
>12_19508430-19509650
LDKGLIRKSSSPWSCAAFYVENAAEKERGVPRLVINYKPLNKVLQWIRYPIPYKHDLIRR-IQGSKIYSKFDMKSGFWQIQIKEEDRYKTAFTTP-FGHYEWNVMPFGLKNAPSEFQKIMNEIFL-PFTSFIIVYIDDVLIFSQ-DVDQHWKHLNMFYKIIVQNGLVVSAKKMKLFQTNVQFLGYKIQ-YDQVQPVARVIEFAEKFP-DEIKDKTQLQRFLGCLNYVSD--FYKDLAKDRKILTERLKKKPP---AWTANHTQAVKKIKGKVKTLP-CLYILD--QDAFKIIESDASDQGYGGILKQKKDSKEQLVRFTSGTWNEAQKNYSTIKKEILAIVKVISKFQG-ELLNQRFLLRIDCKAAKDVLQKDVENLVSKQIFARWQ--AILSCFDFEIEYIKGELNSLPDFLSR
>7_11602879-11604099
LDKGLIRKSSSPWSCAAFYVENAAEKEQGVPRLVINYKPLNKVLQWIRYPIPYKHDLIRR-IQGSKIYSKFDMKSGFWQIQIKEEDRYKTAFTTP-FGHYEWNVMPFGLKNAPSEFQKIMNEIFL-PFTSFIIVYIDDVLIFSQ-DVDQHWKHLNIFYKIIVQNGLVVSAKKMKLFQTNVQFLGYKIQ-YDQVQPVARVIEFAEKFP-DEIKDKTQLQRFLGCLNYVSD--FYKDLAKDRKILTERLKKKPP---AWTAKHTQAVKKIKGKVKTLP-CLYILD--QDAFKIIESDASDHGYGGILKQKKDSKEQLVRFTSGTWNEAQKNYSTIKKEILAIVNVISKFQG-ELLNQRFLLRIDCKAAKDVLQKDVENLVSKQIFARWQ--AILSCFDFEIEYIKGELNSLPDFLSR
>5_20226636-20227853
LDKGLIRKSSSPWSCAAFYVENAAEKEQGVPRLVINYKPLNKVLQWIRYPIPYKH-LIRR-IQGSKIYSKFDMKSGFWQVQIKEEDRYKTAFTTP-FGHYEWNVMPFGLKNAPSEFQKIMNEIFL-PFTSFIIVYIDDVLIFSQ-DVDQHWKHLNIFYKIIVQNGLVVSAKKMKLFQNNVQFLGYKIQ-YDQVQPVARVIEFAEKFP-DEIKDKTQLQRFLGCLNYVSD--FYKDLAKDRKILTERLKKKPL---AWTAKHTQAVKKIKGKVKTLP-CLYILD--QDAFKIIESDASDHGYGGILKQKKDSREQLVRFTSGTWNEAQKNYSTIKK-ILAIVKVISKFQG-ELLNQRFLLRIDCKAAKYVLQKDVENLVSKQIFARWQ--AILSCFDFEIEHIKGELNSLPDFLSR
>7_27574401-27575480
-----------------------------------------------RYPIPYKHDLIRR-IQGSKIYSKFDMKSGFWQIQIKEEDRYKTAFTTP-FGHYEWNIMPFGLKNAPSEFQKIMNEIFL-PFTSFIIVYIDDVLIFSQ-DVDQHWKHLNIFYKIIVQNGLVVSAKKMKLFQTNVQFLGYKIQ-YDQVQPVARVIEFAEKFP-DEIKDKTQLQRFIGCLNYVSD--FYKDLAKDRKILTERLKKKPP---AWTAKHTQAVKKIKGKVKTLP-CLYILD--QDAFKIIESDASDHGYGGILKQKKNSKEQLVRFTSGT-NEAQKNYSTIKKEILAIVKVISKFQG-ELLNQRFLLRIDCKAAKDVLQKDVENLVSKQIFARWQ--AILSCFDFEIEYIKGELNSLPDFLSR
>11_6589388-6590608
LDKGLIRKSSSPWSCAAFYVENAAEKERGVPRLVIKYKPLNKVLQWIRYPIPYKHDLIRR-IQGSKIYSKFYMKSGFWQVQIKEEDRYKTAFTTP-FGHYEWNVMPFGLKNAPSEFQKIMNEISL-PFTSFIIVYIDDVLIFSQ-DVDQHWKHLKIFYKIIVQNGLVVSAKKMKLFQTNVQFLGYKIQ-YDRVQPVARVIEFAEKFP-DEIKDKTQLQRFLGCLNYVSD--FYKDLAKDRKILTERLKKKPP---AWTAKHTQAVKKIKGKVKTLP-CLYILD--QDAFKIIESDASDHGYGGILKQKKDSREQLVRFTSGTWNEAQKNYSTIKKEILAIVKVISKFQG-ELLNQRFLLRIDCKAAKDVLQKDVENLVSKQIFARWQ--AILSYFDFEIEHIKGELNSLPDFLSR
>5_15496076-15497296
LDKGLIRKSSSPWSCAAFYVENAAEKERGVPRLVINYKPLNKVLQWIRYPIPYKHDLIRR-IQGSKIYSKFDMKSGFWQVQIKEEDRCKTTFTTP-FGHYEWNVMPFGLKNAPSEFQKIMNEIFL-PFTSFIIVYIDDVLIFSQ-DVDQHWKHLNIFYKIIVQNGLVVSAKKMKLFQTNVWFLGYKIQ-YDQVQPVARVIEFAEKFP-DEIKDKTQLQRFLGCLNYVSD--FYKDLAKDRKILTKRLKKKPP---AWTAKHTQAVKKIKGKVKTLP-CLYILD--QDAFKIIESDASDHGYGGILKQKKDSREQLVRFISGTWNEAQKNYSTIKKEILAIVKVISKFQG-KLLNQRFLLRIDCKAAKDVLQKDVENLVSKQIFARWQ--AILSCFDFEIEHIKGELNSLPDFLSR
>10_8393852-8395072
LDKGLIRKSSSPWSCAAFYVENAAEKERGVPWLVINYKPLNKVLQWIRYPIPYKHDLIRR-IQGSKIYSKFDMKSGFWQVQIKEEDRYKTAFTTP-FGHYEWNVMPFGLKNAPSEFQKIMNEIFL-PFTSFIIVYIDDVLIFSQ-DVDQHWKHLNIFYKIIVQNGLVVSAKKNKLFQTNVQFLGYKIQ-YDRVQPVARVIEFAEKFP-DEIKDKT-LQRFLGCLNYVSD--FYKDLAKDRKILTERLKKKPP---AWTAKHTQAVKKIKGKVKTLP-CLYILD--QDAFKIIESDASDHGYGGILKQKKDSREQLVRFTSGTWNEAQKNYSTIKKEILAIVKVISKFQG-ELLNQRFLLRIDCKAAKDVLQKDVENLVSTQIFARWQ--AILSCFDFEIQHIKGELNSLPDFLSR
>4_26255515-26256734
LDKGLIRKSSSPWSCAAFYVENAAEKERGVPRLVINYKPLNKVLQWIRYPIPYKHDLIRR-IQGSKIYSKFDMKSGFWQDQIKEEDRYKTAFTTP-FGHYEWNVMPFGLKNAPSEFQIIMNEIFL-PFTSFIIVYIDDVLIFSQ-DVDQHWKHLKIFYKIIVQNGLVVSAKKMKLFQTNVQFLGYKIQ-YDRVQPVARVIEFAEKFP-DEIKDKTQLQRFLGCLNYVSD--FYKDLAKDRKILTERLKKKPP---AWTAKHTQAVKKIKGKVKTLP-CLYILD--QDAFKIIESDASDHGYGGILKQK-DSREQLVRFTSGTWNEAQKNYSTIKKEILAIVKVISKFQG-ELLNQRFLLRIDCKAAKDVLQKDVENLVSKQIFARWQ--AILSCFDFEIEHIKGELNSLPDFLSR
>7_7761826-7763046
LDKGLIRKSSSPWSCAAFYVENAAEKERGVPRLVINYKPLNKVLQWIRYPIPYKHDLIRR-IQGSKIYSKFDMKSGFWQVQIKEEDRYKTAFTTP-FGHYEWNVMPFGLKNAPSEFQKIMNEIFL-PFTSFIIVYIDDVLIFSQ-DVDQHWKHLKIFYKIIVQNGLVVSAKKMKLFQTNVQFLGYKIQ-YDRVQPVARVIEFAEKFP-DEIKDKTQLQRFLGCLNYISD--FYKDLAKDRKILTERLKKKPP---AWTAKHTQAVKKIKGKVKTLP-CLYILD--QDAFKIIESDASDHGYGGILKQKKDSREQLVRFTSGT-NEAQKNYSTIKKEILAIVKVISKFQG-ELLNQRFLLRIDCKAAKDVLQKDVENLVSKQIFARWQ--AILSCFDFEIEHIKGELNSLPDFLSR
>1_36465315-36466535
LDKGLIRKSSSPWSCAAFYVENAAEKERGVPRLVINYKPLNKVLQWIRYPIPYKHDLIRR-IQGSKIYSKFDMKSGFWQIQIKEEDRYKTAFTTP-FGHYEWNVMPFGLKNAPSEFQKIMNEIFL-PFTSFIIVYIDDVLIFSQ-DVDQHWKHLNIFYKIVIQNGLVVSAKKMKLFQTNVQFLGYKIQ-FDQVHPVARVIEFAEKFP-DEIKDKTQLQRFVGCLNYVSD--FYKDLAKDRKILTERLKIKPP---AWTAKHTQAVKQIKSKVKTLP-CLYILD--QDAFKIIESDASDYGYGGILKQKKDSREQLVRFTSGNWNEAHKNYSTIKKEILAIVKVISKFQG-ELLNQRFLLRIDCKAAKDVLQKDVENLVSKQIFARWQ--AILSCFDFEIEHIKGELNSLPDFLSR
>12_17247113-17248332
LDKGLIRKSSSPSSCAAFYVENAAEKERGVPRLVINYKPLNKVLQWIRYPIPYKHDLIRR-IQGSKVYSKFDMKSGF-QIQIKEEDRYKTAFTTP-FGHYEWNVMPFGLKNAPSKFQKNMNEIFL-PFTSFIIVYIDDVLIFSQ-DVDQHWKNLNIFYKIIVQNGLVVSAKKMKLFQTNVQFLGYKIQ-YDQVQQVARVIEFAEKFP-DEIKDKTQLQRFLGCLNYVSD--FYKDLAKGRKILTERLKKKPP---AWTAKHTHAVKQIKSKVKTLP-CLYILD--QDAFKIIESDASDYSYGGILKQKKDSREQLVRITSGTWNEAQKNYSTIKKEILAIVKVISKFQG-ELLNQRFLLRIDCKAAKDVLQKDVENLVSKQIFARWQ--AILSCFYFEIEHIKGELNSLPDFLSR
>7_14514110-14515330
LDKGLIRKSSSPWSCAAFYVENAAEKERGVPRLVINYKPLNKVLQWIRYPIPYKHDLIRR-IQGSKIYSKFDMKSGFWQIQIKEEDRYKTAFTTP-FGHYEWNVMPFGLKNAPSEFQKIMNEIFL-PFTSFIIVYIDDVLIFSQ-NVDQHWKHLNIFYRIVVQNGLVVSAKKMKLFQTNVQFLGYKIQ-YDQVQPVARVIEFAEKFP-DEIKDKTQLQRFLGCLNYVSD--FYKDLAKDRKILTERLKKKPP---AWIAKHTQAVKQIKSKVKTLP-CLYILD--QDAFKIIESDASDYGYGGILKQRKDSREQLVRFTSGTWNEAQKNYSTIKKEILAIVKVISKFQG-ELLNQRFLLRIDCKAAKDVLQKDVENLVSKQIFARWQ--AILSCFDFEIEHIKGELNSLPDFLSR
>1_54925496-54926713
LKKGLIRKSSSPWSCAAFYVENAAEKERGVPRLVINYKPLNKVLQWIRYPIPYKHDLIRR-IQGSQIYSKFDMKSGFWQIQIKEEDRYKTAFTTP-FGHYEWNVMPFGLKNAPSEFQKIMNEIFL-PYTSFIIVYIDDVLIF-Q-NIDQHWKHLNIFHKIIIQNGLVISARKMKLFQTNIQFLGYKIQ-HDQVLPVTRVIEFADKFP-DEIKEKKQLQRFLGCLNYVSD--FYERLAKDRKILTERLKKNPP---AWTTRHTQAVKQIKDKVKRLP-CLYILD--HDALKIIETDASDFGYGGILKQRKDSKEQLIRFASGTWNDAQRNYSTIKKEILAIVKIVSKFQG-ELLNQKFLLRIDCKAAKDVLQKDVENLVSKQIFARWQ--AILSCFDFDIEHIKGEVNSLPDFLSR
>6_37566881-37568098
LKKGLIRKSSAPWSCAAFYVENAAEKERGVPRLVINYKPLNKVLQWIRYPIPYKHDLIRR-IQGSQIYSKFDMKSGFWQIQIKEEDRYKTAFTTP-FGHYEWNVMTFGLKNAPSEFQKIMNEIFL-PYTSFIIVYIDDVLIFSQ-NIDQHWKHLNIFHKIIIQNGLVISARKMKLFQTNIQFLGYKIQ-HDQVLPVTRVIEFADKFP-DEIKEKKQLQRFLGCLNYVSD--FYERLAKDRKILTERLKKNPP---AWTTRHTQAVKQIKDKVKRLP-CLYILD--HDALKIIETDASDFGYGGILKQRKDSKEQLVWFASGTWNDAQRNYSTIKKEILAIVKIVSKFQG-ELLNQKFLLRIDCKAAKDVLQQDVENLVSKQIFARWQ--AILSCFDFDIEHIKGEVNSLPDFLSR
>10_16459235-16460452
LKKGLIRKSSSPWSCAAFYVENATEKERGVPRLVINYKPLNKVLQRIRYPIPYKHDLIRR-IQGSQIYSKFDMKSGFWQIQIKEEDRYKTAFTTP-FGHYEWNAMPFSLKNAPSEFQKIMNEIFL-PYTSFIIVYIDDVLIFSQ-NIDQHWKHLNIFYKIIIQNGLVVSARKMKLFQTNIQFLGYKIQ-HDQVLPVTRVIEFADKFP-DEIKEKKQLQRFLGCLNYVSD--FYERLAKDRKILTERLKKNPP---AWTTRHTQAVKQIKDKVKRLP-CLYILD--HDAFKIIETDASDFGYGGILKQKKDSKEQLVRFASGTWNDAQKNYSTIKKEILAIVKVVSKFQG-ELLNQKFLLRIDCKAAKDVLQKDVENLVSKQIFARWQ--AILSCFDFDIEHIKGEINSLPDFLSR
>4_16776782-16777999
LKKGLIRKSSSPWSYAAFYCENAAEKERGVPRLVINYKPLNKVLQWIRYPIPYKHDLIRR-IQGSQIYSKLDMKSGFWQIQIKEEDRYKTAFTTP-FGHYE-NVMPFGLKNAPSEFQKIMNEIFL-PYTSFIIVYIDDVLIFSQ-NIDQHWKHLNMFHKIIIQNGLVVSARKMKLFQTNIQFLGYKIQ-HDQVLPVTRVIEFADKFP-DEIKEKKQLQRFLGCLNYVSD--FYERLAKDRKILTERLKKNLP---AWTTRHTQEVKRIKSKVKRLP-CLYILD--HDAFKIIEIDASDFGYGGILKQRKDSKEQLIRFASGTWNDAQRNYSTIKKEILAIVKVVSKF-G-ELLNQKFLLRIYCKAAKDVLQKDVENLVSKQIFAR-Q--AILSCFEFDIEHIKGEINSLPDFLSR
>7a_40139060-40140242
LEKGLIRKSYSPWS------ENAAEKERGVPRLVINYKPLNKVLKWIRYLIPYKHDLIRR-IQGSKVYSKFDMKFGFWQIQIQEH-RHKTAFTTP-FGHYEWNVMPFG-ENALSEFQKIMNEIFL-PYT------IDDVLMFSQ-DIDQHWKDLNIFHKVIILNGLVVSARKMKLFQTHMQFLGYRIQ-YDQVLPVAQVIEFADKFP-DDIKEKKQLRRFL-CLNYVSD--FYEALAKDRKIFTERLKKNPP---VWTTKHTQAVKQIKSRVQRLP-CLYILD--QDAYKIIETDASDYGYGGILKQRKDSKEQLFRFTSRTWNDAQKNYSTIKKEILAIVKVVSKFQG-EVINQKFLLRIDCKAAKDVLQKDVENLVSKQIFAGWQ--AILSCFDFDLEHIKGEINSLPDFLSR
>eRTBVL-A1
LKLGAIRESRSPHRSAAFIVRNHAEEVRGKSRMVINYKRLNDNTIEDAYNIPNKQEWINR-IQGSKYFSKFDLKAGFWQVKMAEESIEWTAFTCP-QGHYEWLVMPLGLKNAPALFQRKMQNIFN-DNQEFVLVYIDDLLIFSK-TYKDHIAHLELFFRKVEQNGLILSKKKMEICKEKVNFLGHEIG-EGKIHLQEHIAKKILQFP-DAMNDKKKLQQFLGLVNYARN--HINNLAKLAGPLYAKLRKNGQ--KYFNSEDIKLVRLIKEKVKELK-PLELPL--EESYFIIETDASQQGWGAILKQRPTKFEKICRYASGSY-KLKTVNNTDR-EIMAIINAINAFRL-YLGFKEFTVRTDCEAICRYYNQLNSKKSSTRRWILFEDIITGNGYRVIFEHIKGKDNSLPDMLSR
>eRTBVL-A2
LKLGAIRESRSPHRSAAFIVRNHAEEVRGKSRMVINYKRLNDNTIEDAYNIPNKQEWINR-IQGSKYFSKFDLKAGFWQVKMAEESIEWTAFTCP-QGHYEWLVMPLGLKNAPALFQRKMQNIFN-DNQEFVLVYIDDLLIFSK-TYKDHIAHLELFFRKVEQNGLILSKKKMEICKEKVNFLGHEIG-EGKIHLQEHIAKKILQFP-DAMNDKKKLQQFLGLVNYARN--HINNLAKLAGPLYAKLRKNGQ--KYFNSEDIKLVRLIKEKVKELK-PLELPL--EESYFIIETDASQQGWGAILKQRPTKFEKICRYASGSY-KLKTVNNTDR-EIMAIINAINAFRL-YLGFKEFTVRTDCEAICRYYNQLNSKKSSTRRWILFEDIITGNGYRVIFEHIKGKDNSLPDMLSR
>eRTBVL-B
LKLGAIRESRSPHRSAAFIVRNHAEEVRGKSRMVINYKRLNDNTIEDAYNIPNKQEWINR-IQGSKYFSKFDLKAGFWQVKMAEESIEWTAFTCP-QGHYEWLVMPLGLKNAPAIFQRKMQNIFN-ENQEFILVYIDDLLVFSR-TYKEHIAHLEIFFRKVEQNGLILSKKKMEICKEKINFLGHEIG-EGKIHLQEHIAKKILQFP-DAMNDKKKLQQFLGLVNYARN--HINNLAKLAGPLYAKLRKNGQ--RYFNSEDIKLVRLIKERVKELK-PLELPL--EESYFIIETDASQHGWGAILKQRPTKFEKICRYASGSY-KLKTVNNTDR-EIMAIINAINAFRL-YLGFKEFTVRTDCEAICRYYNQLNSKKSSTRRWVLFEDIITGNGYKXIFEHIKGKDNNLPDMLSR
>eRTBVL-C
LKLGAIRESRSPHRSAAFIVRNHAEEVRGKSRMVINYKRLNDNTIEDAYNIPNKQEWINR-IQGSKYFSKFDLKAGFWQVKMAEESIEWTAFTCP-QGHYEWLVMPLGLKNAPAIFQRKMQNIFN-ENQEFILVYIDDLLVFSR-TYKEHIAHLEIFFRKVEQNGLILSKKKMEICKEKINFLGHEIG-EGKIHLQEHIAKKILEFP-DAMNDKKKLQQFLGLVNYARN--HINNLAKLAGPLYAKLRKNGQ--RYFNSEDIKLVRLIKERVKELK-PLELPL--EESYFIIETDASQLGWGAVLKQRPTKYEKVCRYASGSY-KLKTVGNTDR-EILAIINAINAFRL-YLGFKEFTVRTDCEAICRYYNQLNSKKSSTRRWILFEDIITGNGYKVIFEHIKGKDNHLPDLLSR
>eRTBVL-X
LKLGAIRESRSPHRSAAFIVRNHAEEVRGKSRMVINYKRLNDNTIEDAYNIPNKQEWINR-IQGSKYFSKFDLKAGFWQVKMAEESIEWTAFTCP-QGHYEWLVMPLGLKNAPAIFQRKMQNIFN-ENQEFILVYIDDLLVFSR-TYKEHIAHLEIFFRKVEQNGLILSKKKMEICKEKINFLGHEIG-EGKIHLQEHIAKKILEFP-DAMNDKKKLQQFLGLVNYARN--HINNLAKLAGPLYAKLRKNGQ--RYFNSEDIKLVRLIKERVKELK-PLELPL--EESYFIIETDASQLGWGAVLKQRPTKYEKVCRYASGSY-KLKTVGNTDR-EILAIINAINAFRL-YLGFKEFTVRTDCEAICRYYNQLNSKKSSTRRWILFEDIITGNGYKVIFEHIKGKDNHLPDLLSR
>Rice tungro bacilliform virus NP_056762.1
NKLIKKADPTCRHRTAAFIVRNHSEEVAQKPRIVYNYKRLNDNMHTDPFNIPHKISMINL-IQKANIFSKFDLKAGFHHMKLKDDFKDWTTFTCS-EGLYTWNVCPFGIANAPCAFQRFMQESFG--DLKFALLYIDDILIASN-NEKEHIEHLKIFFNRVKEVGCVLSKKKSKMFLKEVEYLGVEIK-EGKISLQPHIVDKIKKFDKNKLNTLKGLQAYLGLLNYARG--YIKDLSKLVGPLYKKTGKNGQ--RIFNKEDWNIIFKIEREVSKIK-PLERPK--ETDYIIIETDASEEGWGAVLVCKPDKYEKIAGYASGNFGEKKTWTSLDY-EIEAINEALNKFQI-YLD-KDFTIRTDCEAIVKGIKTEDYKKRSKTRWIKLRDNLLKDGYKPTFEHIKGNKNFLPNFLSR
>Cauliflower mosaic virus NP_056728.1
LDLKVIKPSKSPHMAPAFLVNNEAEKRRGKKRMVVNYKAMNKATVGDAYNLPNKDELLTL-IRGKKIFSSFDCKSGFWQVLLDQESRPLTAFTCP-QGHYEWNVVPFGLKQAPSIFQRHMDEAFR-VFRKFCCVYVDDILVFSN-NEEDHLLHVAMILQKCNQHGIILSKKKAQLFKKKINFLGLEID-EGTHKPQGHILEHINKFP-DTLEDKKQLQRFLGILTYASD--YIPKLAQIRKPLQAKLKENVP--WRWTKEDTLYMQKVKKNLQGFP-PLHHPL--PEEKLIIETDASDDYWGGMLKAIKINEELICRYASGSFKAAEKNYHSNDKETLAVINTIKKFSI-YLTPVHFLIRTDNTHFKSFVNLNYKGDSKLGRNIRWQ--AWLSHYSFDVEHIKGTDNHFADFLSR
>Strawberry vein banding virus NP_043933.1
LKLGIIRPSKSPHSSPAFMVRNHAEIKRGKARMVINYKKLNDHTKGDGYLLPNKEQLLQR-IGGKTFYSSFDCKSGFWQVRLAPETIQLTAFSCP-QGHYEWLVMPFGLKQAPAIFQRHMDESLSNMYPQFCAVYVDDIIVFSK-TEEEHLGHVKIVLNRCKALGIVLSKKKAQLCKTTINFLGLVIE-RGNLKVQSHIGLHLVAFP-DQLSDRNALQRFLGLLNYISA--YFPKIANLRSPLQVKLKKEIT--WSWTEKDTETVRKIKSLVKTLP-DLYNPS--PEDKPIIECDASDDHWGAILKAKLPEGEVICRYASGTFKPAEKNYHSNEKEILSIIKAIKAFRA-YILPYKFLVRTDNTNAAYFVRTNIAGDYKQSRLVRWQ--MALREYSFDIEHVSGQKNVLADIMTR
>Figwort mosaic virus NP_619548.1
LDLGLIIPSKSQHMSPAFLVENEAERRRGKKRMVVNYKAINQATIGDSHNLPNMQELLTL-LRGKSIFSSFDCKSGFWQVVLDEESQKLTAFTCP-QGHFQWKVVPFGLKQAPSIFQRHMQTALN-GADKFCMVYVDDIIVFSN-SELDHYNHVYAVLKIVEKYGIILSKKKANLFKEKINFLGLEID-KGTHCPQNHILENIHKFP-DRLEDKKHLQRFLGVLTYAET--YIPKLAEIRKPLQVKLKKDVT--WNWTQSDSDYVKKIKKNLGSFP-KLYLPK--PEDHLIIETDASDSFWGGVLKARALDGELICRYSSGSFKQAEKNYHSNDKELLAVKQVITKFSA-YLTPVRFTVRTDNKNFTYFLRINLKGDSKQGRLVRWQ--NWFSKYQFDVEHLEGVKNVLADCLTR
>Commelina yellow mottle virus NP_039820.1
LQMKVIRPSESKHRSTAFIVRSTGKEKKGKERMVFNYKLLNENTESDQYSLPGINTIISK-VGRSKIYSKFDLKSGFWQVAMEEESVPWTAFLAG-NKLYEWLVMPFGLKNAPAIFQRKMDNVFK-GTEKFIAVYIDDILVFSE-TAEQHSQHLYTMLQLCKENGLILSPTKMKIGTPEIDFLGASLG-CTKIKLQPHIISKICDFSDEKLATPEGMRSWLGILSYARN--YIQDIGKLVQPLRQKMAPTGD--KRMNPETWKMVRQIKEKVKNLP-DLQLPP--KDSFIIIETDGCMTGWGAVCKWKMSKHERICAYASGSFNPIKS--TIDA-EIQAAIHGLDKFKIYYLDKKELIIRSDCEAIIKFYNKTNENKPSRVRWLTFSDFLTGLGITVTFEHIDGKHNGLADALSR
>Banana streak GF virus YP_233107.1
LDIKVIRPSTSKHRTTAIMVNSTGAEKKGKERLVFNYKRLNDNTEKDQYSLPGINTIIAR-ISHSKIYSKFDLKSGFHQVAMEEESIPWTAFWAI-NGLYEWLVMPFGLKNAPAIFQRKMDNCFR-GTEKFIAVYIDDILIFSD-SKEAHRTHLRQFITICEENGLVLSPTKMKIGVQQVDFLGATIG-DSKVRLQPHIVKKVLETKEESLSETKALRRWLGILNYARA--YIPDLGKILGPLYSKTSGKGE--RKLNHQDMKIIHQIKEKVKNLP-ELEVPP--PESIILIETDGCMDGWGGICKWKLNKGEKICAYASGRFNPIKG--AIDA-EIQAVIYSLEKFKIYYLDKRELILRTDSKAIVRFYEKCSEHKPSRVRWMTLTDYISGCGVKVYFEHIDGKDNTLADELSR
>Cassava vein mosaic virus NP_056848.1
IKEGFIEEKTKKYSSPAFIVNKHSEQKRGKTRMVIDYKDLNKKAKVVKYPIPNKDTLIHRSIQAR-YYSKFDCKSGFYHIKLEEDSKKYTAFTVP-QGYYQWKVLPFGYHNSPSIFQQFMDRIFR-PYYDFIIVYIDDILVFSK-TIEEHKIHIAKFRDITLANGLIISKKKTELCKEKIDFLGVQIE-QGGIELQPHIINKILEKH-TKIKNKTELQSILGLLNQIRH--FIPHLAQILLPIQKKLKIKDEEIWTWTKEDEEKIKLIQDYSKNLVIKMKYPINKEDMNWIIEVDASNNAYGSCLKYKPKN-EYLCRYNSGTFKENEQKYDINRKELIAVYQGLQSYSL-FTCEGNKLVRTDNSQVYYWIKNDTNKKSIEFRNIKYLLAKIAV-YNFEIQLIDGKTNIIADYLSR
>Tobacco vein clearing virus NP_569141.1
LDNKYIQESNSKHTSPAFIVNKHSEQKRGKSRMVIDYRNLNAKTKTYNYPIPNK-ILKIRQIQGYNYFSKFDCKSGFYHLKLEDESKKLTAFTVP-QGFYEWNVLPFGYKNAPGRYQHFMDNYFN--QLENCIVYIDDILLYSR-TQDEHIKLLEKFAHIIENSGISLSKTKAEIMKNQIEFLGIQID-KNGIKMQTHIVQKIINLD-ENIDTKKKLQSFLGIVNQVRE--YIPKLAENLKPLQKKLKKDVE--YSFDEKDKEQIKKIKILCKKLP-KLYFPDENKKFTYIVETDSSNYSYGGVLKYRYNK-EHHCRYYSGSYTEPQEKWEINRKELFALYKCLLAFEP-YIVYTRFIVRTDNTQVKWWITRKVQD-SVTTKEIRRLVLNILN-FTFTIEIINTNKNVVADYLSR
>Petunia vein clearing virus NP_127504.1
QQFDLIEPSDSQWACEAFYVNKRSEQVRGKLRLVINYQPLNHFLQDDKFPIPNKLTLFSH-LSKAKLFSKFDLKSGFWQLGIHPNERPKTGFCIP-DRHFQWKVMPFGLKTAPSLFQKAMIKIFQ-PILFSALVYIDDILLFSE-TLEDHIKLLNQFISLVKKFGVMLSAKKMILAQNKIQFLGMDFA-DGTFSPAGHISLELQKFP-DTNLSVKQIQQFLGIVNYIRD--FIPEVTEHISPLSDMLKKKPP---AWGKCQDNAVKQLKQLAQQVK-SLHIP---SEGKKILQTDASDQYWSAVLLEEHNGKRKICGFASGKFKVSEQHYHSTFKEILAVKNGIKKFNF-FLIHTNFLVEMDMRAFPKMIRLNPK-IVPNSQLLRWA--QWFSPYQFEVKHLKGKDNILADFLSR
>Peanut chlorotic streak virus NP_042513.1
IELGILRQSKSPHSAPAFYVENHNEIKRGKRRLVINYK-MNKATKGDAYNLDR-LYLTDR-ESN--WFSTLDAKSGFLQLRLDEETKPLTAFSCPPQMHLEYNVMPMGLKQAPSQFQRFMDNNLR-GLEDISLAYIDDIIVFTKGTKDYHLKQVARVLIQLGNHGVILSKEKAKIAFEEIEFLGLKILKNGFIEPQKHLLEKIAEFP-DQLQDRKQIQKFLGCLNYIGEKGFFKELAKERKVLQKMLSEKLP--WKWNDLATLAVKRLKQVCKNLP-RLYVAK--PSDLLILTTDASDTTWGAVLMAVPNAYFMITKWSSGTFKPAEENYTVHEKELLAFVNALKKFQI-DLRPVKFIFQTDNSWVQGFLVNKLKETYNRGRLARWS--MFIQQFDFISLHIAGKENYLADTLTR
>Blueberry red ringspot virus NP_395469.1
INKGLIRPSKSPHSAPAFYVENHSEIKRAKRRIVINYKAMNEATIGTPKTLPRADYIMNR-LKGKIWFSTLDVKSAYWQLRLTEESKPLTAFSYPPPKHYEWNVLPMGLKQAPGIFQEFMNRSLH-NLEHICLVYVDDIIIFSEKDKNDHLSKVLQVLKRCEDEGIILSQPKAKIAHKEIDFFGLHIS-EGEIILQPHILEKLVLFP-DEIENRKQLQRFLGNLNYISEKGFFKDFAKYRKELQKKVSEKVP--WKWTSYDTTQVQALKTLCQRLP-KLYNAK--ESDLLIIATDASNGHWGAVMTAVTP--ELLTKYASGTFTDTEKRYPIHELETLAVLQTFRKWKV-DLLSKPFILKTDSKYVTGFLRYKIKANYNQGRFIRWQ--LELSQFNYRTFYIKGSENYGPDTLTR
>Soybean chlorotic mottle virus NP_068729.1
LKKGLIRESQSPHSAPAFYVENHNEIKRGKRRMVINYKKMNEATIGDSYKLPRKDFILEK-IKGSLWFSSLDAKSGYYQLRLHENTKPLTAFSCPPQKHYEWNVLSFGLKQAPSIYQRFMDQSLK-GLEHICLAYIDDILIFTKGSKEQHVNDVRIVLQRIKEKGIIISKKKSKLIQQEIEYLGLKIQGNGEIDLSPHTQEKILQFP-DELEDRKQIQRFLGCINYIANEGFFKNLALERKHLQKKISVKNP--WKWDTIDTKMVQSIKGKIQSLP-KLYNAS--IQDFLIVETDASQHSWSGCLRALPKGKLLLCKYVSGTFTDTETRYPIAELEVLAGVKVLEKWRI-DLLQTRFLLRTDSKYFAGFCRYNIKTDYRNGRLIRWQ--LRLQAYQPYVELIKSENNPFADTLTR
>RIRE3 AB014738.1
KEKGYIRPST---GAPVIFVEK----KDKTKRMCVDYRALNEVTIKNKYPLPRIDDLFDQ-LKGATVFSKIDLRSGYHQLRIREEDIPKTAFTTR-YGLYEFTVMSFGLTNAPAFFMNLMNKVFMEYLDKFVVVFIDDILIYSQ-SEEDHQHHLRLVLGKLREHQLYAKLSKCEFWLSEVKFLGHVIS-AKGVAVDPETVTAVTDWK--QPKTVTQVRSFLGLAGYYRS--CIENFSKIARPMTQLLKKEEK--FVWSPQCEKAFKTLKEKLVSSP-VLILPD--TRKDFMVYCDASRQGLGCVLMQDGH----VVAYASRQLRPHEGNYPTHDLELAAVVHALKIKRH-YLIGNRCEIYINHKFLKYIFTQSDLNLRQRRWLELIKD------YNVGIHYHPGKANVVADALSR
>RIRE7 BAA89466.1
LDKGYVRESL---SVPVLLVPK----KDGSWRMCVDCRAINNITIRYRHPIPRLDDMLDE-LSGSLVFSKIDLRSGYHQIRMKLGDEWKTAFKTK-FGLYEWLVMPFGLTNAPSTFMRLMNEVLRAFIGRFVVVYFDDILIYSR-SIEDHHGHLRAVFDALRDARLFGNLEKCTFCTDRVSFLGYVVT-PQGIEVDQAKVEAIHSWP--VPTTITQVRSFLGLAGFYRR--FVKDFSTIAAPLHELTKRNVT--FTWAAAQRNAFDTLKDKLTHAP-LLQLPD--FNKTFELECDASGIGLGGVLLQEGK----PVAYFSEKLSGPSLNYSTYDKELFALVRTLETWQH-YLWPKEFVIHSDHESLKHIRSQAKHNRRHAKWVEFIES------FPYVIKHKKGKENVIADALSR
>Dagul ABA99634.1
ESKGYVRPSS---GAPVLLVKK----KDGSERMVIDYRALNEVTIKNKYPLPRIDDLFDQ-LKGARVFSKIDLRSGYHQLKIRSEDIPKTAFSTR-YGLYEFTVMSFGLTNAPAFFMNLMNKIFMEYLDQFVVVFIDDILIYSK-NEEEHAEHLRLIMEKLRDHQLFAKFSKCEFWLDRVAFLGHVIS-SNGVEVDPSKVEAVLAWN--PPKNVSEIRSFLGLAGYYRR--FIEGFSKLARPMTELLKKEKK--FQWSTACEDNFQEMKKRLTTAP-VLTLPD--IRKDFEIFCDASRQGLRCVLMQERK----VVAYASRQLRPHEVNYPTHDLELAAVIHALKIWRH-YLIGNRCEVYTDHKSLKYIFTQTELNMRQRRWLELIKD------YDLGIHYHPGKANVVADALSR
>Tma AAC69377.1
LEPGTAPLSKDLLGAPVLFVKK----KDGSFRLCIDYRGLNWVTVKNKYPLPRIDELLDQ-LRGATCFSKIDLTSGYHLIPIAEADVRKTAFRTR-YGHFEFVVMPFGLTNAPAAFMRLMNSVFQEVLDEFVIIFIDDILVYSK-SLEEHEVHLRRVMEKLREQKLFAKLSKCSFWQREMGFLGHIVS-AEGVSVDPEKIEAIRDWH--TPTNATEIRSFLGLAGYYRR--FVKGFASMAQPMTKLTGKDVP--FVWSPECEEGFVSLKEMLTSTP-VLALPE--HGEPYMVYTDASGVGLGCVLMQRGK----VIAYASRQLRKHEGNYPTHDLEMAAVIFALKIWRS-YLYGGNVQVFTDHKSLKYIFTQPELNLRQRQWMELVAD------YDLEIAYHPGKANVVADALSH
>LORE1a CAJ00278.1
LESGVIQPSS---ASPIVLVKK----KDGSWRMCVDYRKLNDMTVKAKFPIPLVEDLLDE-LGGAKIFSKLDLRAGYHQLRMRPEDVEKTAFQTH-SGQYEYVVMPFGLTNAPSTFQGAMNAIFAPFLRKSVLIFFDDILVYSA-TVEAHLQHLREVFAVLRKHSFYVKRSKCAFFTPVIEYLGHFIS-ASGVSTDSTKIKAIQDWP--EPVTIKQLRGFLGLTGYYRR--FIKGYSILASPLTDLLRKD-G--FHWSAAASAAFLQLKNALVQAP-VLAIPD--LQKPFTVETDASSTGIGAVLLQDKH----PVAFISKVLSPRNRLLSVYDRELLALVHAVTKWHQ-YLAIQQFTILTDQQSLKFLLEQRLSTPAQYRWVTKLMG------LSYVIQYKRGKENVVADALSR

#for Fig. 3C
>IRGSP-1.0:1:23902731:23904524:-1
AAGATAATGAATAAAGATCTTGTCATCCCCGACAAAGATCACTATTCAAGATAAGGAATCTACACTATTCTAGATAAGATAAGTCTATGGTCAAAAGGCGATATTATGACATCTTTATTGAAGGTCAAAAGCGTCATCATCAAAGATTCTCTCCATGAAGTCTAAAGGGATATCATGAACTCTTTGAAGTCAAGAAGAGATATCATGAAGATTCTCTACCGAGCGCTATATAAGGGGCTCA-------------GAGGCATCGCATTCCACACACAACACATCTCACTCAACCGTTCCTCTCACCGCTCCACCAGCCATCACACTCCACTCCACTCCATCAAAGTGTTAGTACTATAGTATAACCTAAATAAAAGACTCATGAGAGTCTAAGTGTGAGAGTCTATGTAAGAGTCTTTGTGAGAGTCCTGTACCTGTATAATTACGAACGTGTTGTACCAAGTCCTTGGTGTAATCTTCAGAAGGAACTACCTTCAACCTATCAAGGTATATGAATGAACACCTGGACCGTTCTATATA
>IRGSP-1.0:1:8845323:8847149:1
AAGATAATGAATAAAGATCTTGTCATCCCCGACAAAGATCACTATTCAAGATAAGGAATCTACACTATTCAAGATAAGATAAGTCCATAGTCAAAAGGCGATATTATGACATCTTTATTAAAGGTCTAAAGCGTCATCACCAAAGATTCTCTCCATGAAGTCTAAAGGGGTATCATAAACTCTTTGAGGTCAAGAAGAGATATCATGAAGATACTCTACCGAGCGCTATATAAGGGGCTCACCATCACATTTCACAGGCATCGCATTTCACACACAACACATCTCACTCAACCATTCCTCTCACCTCTCCACCAGCCATCACACTCCACTCCACTCCATCTAAGTGTTAGTACTATAGTATAACCTAAATAAAAGACTCATGAGAGTCTAAGTGTGAGAGTCTATGTAAGAGTCCTTGTGAGAGTCCTGTACCTGTATAATTACGAACGTGTTGTACCAAGTCCTTGGTGTAATCTTCAGAAGGATCTACCTTCAACCTATCAAGGTATATGAATGAACACCTGGACTGTTCTATATA
>IRGSP-1.0:2:11309589:11311418:1
AAGATAATGAATAAAGATCTTGTCATCCCCGACAAAGATCACTATTCAAGATAAGGAATCTACACTATTCCAGATAAGATAAGTCCATAGTCAAAAAGCGATATTATGACATCTTTATTAAAGGTCTAAAGCGTTATCACCAAAGATTCTCTCCATGAAGTCTAAAGGGGTATCATAAACTCTTTAAGGTCAAGAAGAGATATCATGAAGATTCTCTACCGAGCGCTATATAAGGGGCTCACCATCACATTTCACAGGCATCGCATTTCACACACAACACATCTCACTCAACCATTCCTCTCACCTCTCCACCAGCCATCACACTCCACTCCACTCCAACTAAGTGTTAGTACTATAGTAGAACCTAAATAAAAGACTCATGAGAGTCTAAGTGTGAGAGTCTATGTAAGAGTCCTTGTGAGAGTCCTGTACCTGTATAATTACGAACGTGTTGTACCAAGTCCTTGGTGTAATCTTCAGAAGGATCTACCTTCAACCTATCAAGGTATATGAATGAACACCTGGACCGTTCTATATA
>IRGSP-1.0:3:22472973:22474626:1
AAGATAATGAATAAAGATCTTGTCATCCCCGACAAAGATCACTATTCAAGATAAGGAATCTACACTATTCCAGATAAGATAAGTCTATGGTCAAAAGGCGATATTATGACATCTTTATTGAAGGTCAAAAGCGTCATCATCAAAGATTCTCTCCATGAAGTCTAAAGGGATATCATGAACTCTTTGAAGTCAAGAAGAGATATCATGAAGATTCTCTACCGAGCGCTATATAAGGGGCTCACTATCACATTTCAGAGGCATCGCATTCCACACACAACACATCTCGCTCAACCGTTCCTCTCACCGCTCCACCAGCCATCACACTCCACTCCACTCCATCTAAGTGTTAGTACTATAGTATAACCTAAATAAAAGACTCATGAGAGTCTAAGTGTGAGAGTCTATGTAAGAGTCTTTGTGAGAGTCATGTACCTGTATAATTACGAACGTGTTGTACCAAGTCCTTGGTGTAATCTTCAGAAGGAACTACCTTCAACCTATCAAGGTATATGAATGAACACCTGGACCGTTCTATATA
>IRGSP-1.0:4:23049961:23050625:-1
AAGATAATGAATGAAGATCTTGTTATCCTCGACAAAAAACACTATTGAAGATAAGGAATCTACACTATTCAAGATAAGATATGCCTATAGTCAAAAGGCGATATTATGATACTTTTATTGAAGGTCAAAAGCGTCATCACCAAAGATTCTCTCCGTGAAGTCTAAAGGGATATCATAAACCCCTTAAAGTCAAATGGAGATATCATAAAGATTCTTCACCGAGTCCTATATAAGGGGCTCAGGAACACAAC---------------------CACAACACATCTCACTCAACCATTCCTCTCACCTCTCCACCAGCCATCACACTT-----CACTCCATCTAAGTGTTAGTAGTATAGTATAACCTAAATAAAAGACTTATGAAATTCTAAGTGTGAGAGTCTATGTAAGAGTCCTTGTGAGAGTCATGTACCTGTATAATTACGAACGTGTTGTACCAAGTCCTTGGTGTAATCTTCAGAAGGATCTACCTTCAACCTATCAAGGTATATGAATGAACACATGGACCGTTCTATATA
>IRGSP-1.0:4:23051051:23052909:1
AAGATAATGAATGAAGATCTTGTCATCCCCGACAAAAAACACTATTGAAGATAAGGAATCTACACTATTCAAGATAAGATATGCCTATAGTCAAAAGGCGATATTATGATACTTTTATTGAAGGTCAAAAGCGTCATCACCAAAGATTCTCTCCGTGAAATCTAAAGGGACATCATAAACCCCTTAAAGTCAAATGGATATATCATAAAGATTCTTCACCAAGTCCTATATAAGGGGCTCAGGAACACAA------------------CACACAAAACACATCTCACTCAACCATTCCTCTCACCTCTCCACCAGCCATCACACTTCACTCCACTCCATCTAAGTGTTAGTAGTATAGTATAACCTAAATAGAAGACTTATGAAAGTC-AAGTGTGAGAGTCTATGTAAGAGTCCTTGTGAGAGTCCTGTACATGTATAATTATGAACGTGTTGTACCAAGTCCTTGGTGTAATCTTCAGAAGGATCTATCTTCAACCTATCAAGGTATATGAATGAACACATGGACCATTCTATATA
>IRGSP-1.0:5:20224853:20225487:-1
AAGATAATGAGTAAAGATCTTGTCATTCCCGATAAAGATCACTATTCAAGATAAGGAATCTACACTATTCCAGATAAGATAAGTCCATGGTCAAAAGGCGATATTATGACATCTTTATTGAAGGTCAAAAGCTTCATCACCAAAGATTCTCTCCGTAAAGTCTAAAGGGATATCATGAACTCTTTGAAGTCAAGAAGAGATATCATGAAGATTCTCTACCGAGCGCTATATAAGGGGCTCACCATCACACTTCGGAGGCATCGCATTTCACACACAACACATCCCACTCAACCATTCCTCTCACCTCTCCACCAGCCATCACACTCCACTCCACTCCATCTAAGTGTTAGTACTATAGTATAACCTAAATAAAAGACTCATGAGAGTCTAAGTGTGAGAGTCTATGTAAAAGTCCTTGTGAGAGTCCTGTACTTGTATAATTACGAACGTGTTGTACCAAGTCCTTGGTGTAATCTTCAGAAGGATCTACCTTCAACCTATCAAGGCATATGAATGAACACCGGGACCATTCTATATA
>IRGSP-1.0:7:27572424:27573252:-1
AAGATAATGAGTAAAGATCTTGTCATCCCCGACAAAGATCACTATTCAAGATAAGGAATCTACACTATTCCAGATAAGATAAGTTTATGGTCAAAAGGCGATATTATGACATCTTTATTGAAGGTCAAAAGCGTCAT---CAAAGATTCTCTCCATGAAGTCTAAAGGGATATCATGAACTCTTTGAAGTCAAAAAGAGATATAATGAAGATTCTCTACCGAGCGCTATATAAGGGGCTCACTATCACATTTCAGAGGCATCGCATTCCACACACAACACATCTCACTCAACCATTCCTCTCACCGCTCCACCAGCCATCACACTCCACTCCACTCCATCTAAGTGTTAGTACTATAGTATAACCTAAATAAAAGACTCATGAGAGTCTAAGTGTGAGAGTCTATGTAAGAGTCCTTGTGAGAGTCCTGTACCTGTATAATTACGAACGTGTTGTACCAAGTCCTTGGTGTAATCTTCAGAAGGATCTACCTTCAACCTATCAAGGTATATGAATAAACACCTGGACCGTTCTATATA
>IRGSP-1.0:9:20419349:20421219:1
AAGATAATGAATAAAGATCTTGTCATTCCCGACATAGATCACTATTCAAGATAAGGAATCTACACTATTGCAGATAAGATAAGTCTATGGTCAAAAGGCGATATTATGACATCTTTACTAAAGGTCAAAAGCGTCATCACCAAAGATTCTCTTCATGAAGTCTAAAGGGATATCATGAACTCTTTGAAGTCAAGAAGAGATATCATGAAGATTCTCTACCGAGCGCTATATAAGGGGCTCACCATCACATTTCAGAGGCATCGCATTTCACACACAACACATCTCACTCAACCATTCCTCTCACCTCTCCACCAGCCATCACACTCCACTCCACTCCATCTAAGTGTAAGTACTATAGTATAACCTAAATAAAAGACTCATGAGAGTCTAAGTGTGAGAGTCTATGTAAGAGTCCTTGTGAGAGTCCTGTACCTGTATAATTACGAACGTGTTGTACCAAGTCCTTGGTGTAATCTTCAGAAGGATCTACCTTCAACCTATCAAGGTATATGAATGAACACCTGGACCGTTCTATATA
>IRGSP-1.0:9:21423506:21425379:-1
AAGACAATGAATAAAGATCTTGTCATCCCCAACAAAGATCACTATTCAAGATAAGGAATCTACACTATTCTAGATAAGATAAGTCTATAGTCCAAAGGCGATATTATGACATCTTTATTAAAGGTCTAAAGCGTCATCACCAAAGATTCTCTCCATGAAGTCTAAAGGGGTATCATAAACTCTTTAAGGTCAAGAAGAGATATCATGAAGATTCTCTACCGAGCGCTATATAAGGGGCTCACCATCGCATTT----------------CACACACAACACATCTCACTCAACCATTCCTCTCACCTCTCCACCAGCCATCACATTCCACTCCACTCCATCTAAGTGTTAGTACTTTAGTATAACCTAAATAAAAGACTCATGAGAGTCTAAGTGTGAGAGTCTATGTAAGAGTCCTTGTGAGAGTCCTGTACCTGTATAATTACGAACGTGTTGTACCAAGTCCTTGGTGTAATCTTAAGAAGGATCTACCTTCAACCTATCAAGGTATATGAATGAACACCTGGACCGTTCTATATA
>IRGSP-1.0:10:8408687:8410513:1
AAGATAATGAATAAAGATCTTGTCATCCCCGACAAAGATCACTATTCAAGATAAGGAATCTACACTATTCCAGATAAGATAAGTTTATGGTCAAAAGGCGATATTATGACATCTTTATTGAAGGTCAAAAGCGTCATCATCAAAGATTCTCTCCATGAAGTCTAAAGGGATATCATGAACTCTTTGAAGTCAAAAAGAGATATCATGAAGATTCTCTACCGAGCGCTATATAAGGGGCTCACTATCACATTTCAGAGGCATCGCCTTCCACACACAACACTTCTCACTCAACCATTCCTCTCACCGCTCCACCAGCCATCACACTCCACTCCACTCCATCTAAGTGTTAG--------TATAACCTAAATAAAATACTCATGAGAGTCTAAGTGTGAGAGTCTATGTAAGAGTCCTTGTGAGAGTCCTGTACCTGTATAATTACGAACGTGTTGTACCAAGTCCTTGGTGTAATCTTCAGAAGGATCTACCTTCAACCTATCAAGGTATATGAATGAACACCTGGACCGTTCTATATA
>IRGSP-1.0:11:11860530:11861093:-1
AAGATAATGAATAAAGATCCTGTCATCCCCGACAAAGATCACTATTCAAGATAAGGAATCTACACTATTCTAGATAAGATAAGCCTATAGTCAAAAGGCGATATTATGACATCTTTATTGAAGGTCAAAAGCGTCATCACCAAAGATTCTCTCCATGAAGTCTAAAGGGATATCATAAACTCTTTGAAGTCAAGAAGAGATATCATGAAGATTCTCTACCGAGTGCTATATAAGGGGCTCACCATCGCATTCCACAAGCATCGCATTTCACACACAACACATCTCACTCAACCATTCCTCTCGCCTCTCCACCAGCCATCACACTCCACTCCACTCCATCTAAGTGTTTGTACTATAGTATAACCTAAATAAAAGACTCATGAGAGTCTAAGTGTGAGAGTCTATGTAAGAGTCCTTGTGAGAGTCCTGTACCTGTATAATTACGAACGTGTTGTACCAAGTCCTTGGTGTAATCTTCAGAAGGATCTACCTTCAACTTATCAAGGTATATGAATGAACACCTGGACCGTTCTATATA
>IRGSP-1.0:11:19847669:19848205:1
AAGATAATGAATAAAGATCTTGTCATCCCCGACAAAGATCACTATTCAAGATAAGGAATCTATACTATTCCAGATAAGATAAGTCTATGGTCAAAAGGCGATATTATGACATCTTTATTGAAGGTCAAAAGCGTCATCATCAAAGATTCTCTCCATGAACTTTAAAGGGATATCATGAACTCTTTGAAGTCAA-AAGAGATATCATGAAGATTCTCTACTGAGCGCTATATAAGGGGCTCACTATCACATTTCAGAGGCATCGCATTCCACACACAACACATCTCACTCAACCATTCCTCTCACCGCTCCACTAGCCATCACACTCCACTCCACTCCATCTAAGTGTTAGTACTATAGTATAACCTAAATAAAAGACTCATGAGAGTCTAAGTGTGAGAGTCTATGTAAGAGTCTTTGTGAGAGTCCTGTACCTGTATAATTAGGAACGTGTTGTACCATGTCCTTGGTGTAATCTTCAGAAGGATCTACCTTCAACCTATCAAGGTATATGAATGAACACCTGGACCGTTCTATATA
>IRGSP-1.0:11:28541504:28543323:-1
AAGATAATGAATAAAGATCTTGTCATCCCCGACAAAGATCACTATTCAAGATAAGGAATCTACACTATTCCAGATAAGATGAGTCCATAGTCAAAAGGCGATATTATGACATCTTTATTAAAGGTCTAAAGCGTCATCACCAAAGATTCTCTCCATAAAGTCTAAAGGGGTATCATAAACTCTTTGAGGTCAAGAAGAGATATCATAAAGATTCTCTACCGAGCGCTATATAAGGGGCTCATCATCACATTCCACAGGCATCGCATTTCACACACAACACATCTCACTCAACCATTCCTCTCACCTCTCCACCAGCCATCACACTCCACTCCACTCCATCTAAGTGTTAGTACTATAGTATAACCTAAATAAAAGACTCATGAGAGTCTAAGTGTGAGAGTCTATGTAAGAGTCCTTGTGAGAGTCCTGTACCTGTATAATTACGAACGTGTTGTACCAAGTCCTTGGTGTAATCTTCAGAAGGATCTACCTTCAACCTATCAAGGTATATGAATGAACACCTGAACCGTTCTATATA
>IRGSP-1.0:11:28585685:28587506:-1
AAGATAATGAATAAAGATCTTGTCATCCCCGACAAAGATCACTATTCAAGATAAGGAATCTACACTATTCCAGATAAGATGAGTCCATAGTCAAAAGGCGATATTATGACATCTTTATTAAAGGTCTAAAGCGTCATCACCAAAGATTCTCTCCATAAAGTCTAAAGGGGTATCATAAACTCTTTGAGGTCAAGAAGAGATATCATAAAGATTCTCTACCGAGCGCTATATAAGGGGCTCATCATCACATTCCACAGGCATCGCATTTCACACACAACACATCTCACTCAACCATTCCTCTCACCTCTCCACCAGCCATCACACTCCACTCCACTCCATCTAAGTGTTAGTACTATAGTATAACCTAAATAAAAGACTCATGAGAGTCTAAGTGTGAGAGTCTATGTAAGAGTCCTTGTGAGAGTCCTATACCTGTATAATTACGAACGTGTTGTACCAAGTCCTTGGTGTAATCTTCAGAAGGATCTACCTTCAACCTATCAAGGTATATGAATGAACACCTGGACCGTTCTATATA
>IRGSP-1.0:11:8298183:8299953:1
AAGATAATGAATAAAGATCTTGTCATTCCCGACAAAGATCACTATTCAAGATAAGGAATCTACACTATTCCAGATAAGATAAGTCT----------------------------------AAGGTCAAAAGCGTCATCACCAAAGATTTTCTCCATGAAGTCTAAAGGGATATCATGAACTCTTTGAAGTCAAGAAGAGATATCATGAAGATTCTCTACCGAGCGCTATATAAGGGGCTCACAATCATATTTCAGAGGCATCGCATTTCACACACAACACATCTCACTCAACCATTCCTCTCACCTCTCCACCAGCCATCGCACTCCACTCCACTCCATCTAAGTGTTAGTACTATAGTATAACCTAAATAAAAGACTCATGAGAGTCTAAGTGTGAGAGTCTATGTAAGAGTCCTTGTGAGAGTCCTGTACCTGTATAATTACAAACGTGTTGTACCAAGTCCTTGGTGTAATCTTCAAAAGGATCTACCTTCAACCTATCAAGGTATATGAATGAACACCTCGACTGTTCTATATA
>IRGSP-1.0:12:19510798:19511349:1
AAGATAATGAATAAAGATCTTGTCATCCCCGACAAAGATCACTATTCAAGATAAGGAATCTACACTATTCCAGATAAGATAAGTCTATGGTCAAAAGGCGATATTATGACATCTTTATTGAAGGTCAAAAGCGTCATCATCAAAGATTCTCTCCATGAAGTCTAAAGGGATATCATGAACTCTTTGAAGTCAAGAAGAGATATCATGAAGATTCTCTACCGAGCACTATATAAGGGGCTCACTATCACATTTCAGAGGCATCGCATTCCACACACAACACATCTCACTCAACCGTTCCTCTCACCGCTCCACCAGCCATCACACTCCACTCCACTCCATCTAAGTGTTAGTACTATAGTATAACCTAAATAAAAGACTCATGAGAGTCTAAGTGTGAGAGTCTATGTAAGAGTCTTTGTGAGAGTCCTGTACCTGTATAATTACGAACGTGTTGTACCAAGTCCTTGGTGTAATCTTCAGAAGGAACTACCTTCAACCTATCAAGGTATATGAATGAACACCTGGACCGTTCTATATA

#for Fig. 4C
>Chr03:286801-293657R
CAAAGGAATCTACATTATTGAAGATAAGACCAAACATTATCAAGAGTCTAAAGGCTCATCATGAAGGCCTTTTCAAAGTCAAAAGTATCATCATAATGCCCATAGATAGTCAAAAAGAGATATCATGAAGATGCTCCACTACTTTTGTGAAGTCAAAAAGATCATCATGAAGATTCCCCAATAATGTATAACAAGGGTCAAAAAGACCATCATGAAGATGCACCAATAATGCAAGAAAAAGGTCAAAAGAGTCATCATGAAGATGCACCTCCACCAACAACCATATCCTTGCCACCCCTATATAAGAAGAGGAAGAGGCAAGAGGAGGGCACACACCCAAGCTCCAGCCCTCAAGCTCGAGCA-----CACCTAAGTATTGTAGTAGTGTCATGTACTCTAAATAAGAGGCTCAGTGTGAGAGTCCAATGAGAGTCGTCTTGTAAACAAGTCCCTGTAATTTGTTTGTGTGTTCGTGTGT-TCAAGAGCCTGGTGTACTACTCGAAGGCGTTCACCTTCGACTATCAAGGTACCTAATATAATCCAGGACTATGTTTGTATAATTGTGTTCATGTTCTACTTTCTTTAT
>Chr03:18267703-18270253R
CAAAGGAATCTACATTATTGAAGATAAGACCAATCTTTATCAAGAGTCCAAACGCACATCATGAAGGCCTTTACAAAGTCAAAAGTATCATCATAATGCCTATAGATAGTCAAAA-GATATATCATGAAGATACTCCACTACTTTTTTGAAGTCAAAAAGGTCATCATGAAGATACACCAATAATGTATGACAAGAGTAAAAAAGACCATCATGAAGATACACCAATAATGCATGAGAAGAGTTAAAAGAATCATCATAAAAATACACCTCCACTAACAACCAGACCCTTGCCATCCCTATATAAGGAGAAGAAGAGGCAAG-GGAGAGCACCAACACAAGCTAAAGCTCTTGAGCATGAGCACCATCCACCTAAGTATTGTAGTAGTGTCATGTACACTAAATAAGAGACTCAGTATGAGAGTTTAATGAGAGTCGTTTTGTAAACAAGTCCGTATACTTCGTTCGTGTGTTCGTGTGTATCAAGAGCGTGGTGTACTACTCAGAGGCATTCATCTTCAACTATCAAGGTACCTAATATAATCCTGGACTATGTTTATATAATTCTATTCATATTCTATATTCTTTAT
>Chr04:46230217-46237235F
CAAAGGAATCTACATTATTGAAGATAAGACCAAACATTATCAAGAGTCTAAAGGCACATCATGAAGGCCTTTTCAAAGTCAAAAGTATCATCATAATGCCTATAGATTGTCAAAAAGAGATATCATGAAG----------------------TCAAAAAGGTCATCATAAGGATTCCCCAATAATGTATGACAAGGGTCAAAAAGACCATCATAAAGATGCATCAATAATGCAAGAAAAGAGTCAAAAGAGTCATCATGAAGATGCACCTCCACCAACAACCATATCCTTGCCACCCCTATATAAGAAGAGGAAGAGGCAAGAGGAGGGCACACACCCAAGCTCAAGCCCTTGAGCACGAGCACCATCCACCTAAGTATTGTAGTAGTGTCATGTACTCTAAATAAGAGGCTCAGTGTGAGAGTCTAATGAGAGTCGTCTTGTAAACAAGTCCATGTACTTTGTTCGTGTGTTCGTGTGTATCAAGAGCCTGATGTACTACTCGAAGGCATTCACCTTCGACTATCAAGGTACCTAATATAATCCAGGACTATGTATGTATAATTATGTTCATGTTCTACTTTCTTTAT
>Chr05:13007912-13013637F
CAAAGGAATCTACATTATTGAAGATAAGACCAAACATTATCAAGAGTCTAAAGGCTCATCATGAAGGCCTTTTCAAAGTCAAAAGTATCATCATAATGCCCATAGATAGTCAAAAAGAGATATCATGAAGATGCTCCACTACTTTTGTGAAGTCAAAAAGATCATCATGAAGATTCCCCAATAATGTATAACAAGGGTCAAAAAGACCATCATGAAGATGCACCAATAATGCAAGAAAAAGGTCAAAAGAGTCATCATGAAGATGCACCTCCACCAACAACCATATCCTTGCCACCCCTATATAAGAAGAGGAAGAGGCAAGAGGAGGGCACACACTCAAGCTCAAGCCCTCAAGCTCGAGCACCAACCACCTAAGTATTGTAGTACTGTCATGTACTCTAAATAAGAGGCTCAGTGTGAGAGTCTAATGAGAGTCGTCTTGTAAATAAGTCCCTGTACTTTGTTCGTGTGTTCGTGTGTATCAAGAGCCTGGTGTACTACTCGAAGGCATTCACCTTCGACTATCAAGGTACCTAATATAATCCAGGACTATGTTTGTATAATTATGTTCATGTTCTAATTTCTTTAT
>Chr05:13013665-13020548F
CAAAGGAATCTACATTATTGAAGATAAGACCAAACATTATCAAGAGTCTAAAGGCTCATCATGAAGGCCTTTTCAAAGTCAAAAGTATCATCATAATGCCCATAGATAGTCAAAAAGAGATATCATGAAGATGCTCCACTACTTTTGTGAAGTCAAAAAGATCATCATGAAGATTCCCCAATAATGTATGACAAG--TCAAAAAGACCATCATGAAGATGCACCAATAATGCAAGAAAAGAGTCAAAAGGGTCATCATGAAGATGCACCTCCACCAACAACCATATCCTTGCCACCCCTATATAAGAAGAGGAAGAGGCAAGAGGAGGGCACACACCCAAGCTCAAGCCCTCAAGCTTGAGCACCATCCACCTAAGTATTGTACTAGTGTCATGTACTCTAAATAAGAGGCTCAGTGTGAGAGCCTAATGAGAGTCGTCTTGTAAACAAGTCCCTGTTCTTTGTTCGTGTGTTCGTGTGTATCAAGAGCCTGGTGTACTACTCGAAGGCATTCACCTTCGACTATCAATGTACCTAATATAATCCAGGACTATGTTTGTATAATTATGTTCATGTTCTACTTTCTTTAC
>Chr05:33532220-33538691F
CAAAGAAATCTACATTACTGAAGATAAGACCAAACTTTATCAAAAGTCCAAAGGCACATCATGACGGCCTTTACAAAGTCAAAAGTATCATCATAATACCTATAGATAGTCAAAA-GAGATTTCATGAAGATGCTCCACTACTTTTGTGAAGTCAAAAAGGTCAGCATGAAGATACCCCAATAATGTATGACAAGAGCCAAAAAGACCATCATGAAGATGCACCAATAATGCAAGAGAAGAGTCATAAGAATCATCATGAAGATGCACCTCCACCAACAACCATACCCTTGCCACCCCTATATAAAGAGAGGAAAAGGCAAGGGAGAGGCACCAACACAAGCTCAAGCTCTCAAGCACGAGCACCATCCACCTAAGTATTGTAGTAGTGTCATGTACTCTGAATAAGAGACCCAGTGTGAGAGTCTAATGAGAGCCATCTTATAAAAAAGTCCCTGTACTA--------TGTTCGTGTGTATCAAGAGCCTGGTGTACTACTCAGAGGCATTCACCTTCGACTATCAACGTACCTAATATAATCCAGGACTATGTTTGTATAATTGTGTTCATGTTCTAATTTCTTTAC
>Chr05:47930070-47936859F
CAAAGGAATCTACATTATTGAAGATAAGACCAAACATTATCAAGAGTCTAAAGGCTCATCATGAAGGCCTTTTCAAAGTCAAAAGTATCATCATAATGCCCATAGATAGTCAAAAAGAGATATCATGAAGATGCTCCACTACTTTTGTGAAGTCAAAAAGATCATCATGAAGATTCCCCAATAATGTATGACAAGGGTCAAAAAGACCATCATGAAGATGCACCAATAATGCAAGAAAAGAGTCAAAAGAGTCATCATGAAGATGCACCTCCACCAACAACCATATCCTTGCCACCCCTATATAAGAAGAGGAAGAGGCAAGAGGAGGACACACACCAAAGCTCAAGCCCTCAAGCTTGAGCACCAACCACCTAAGTATTGTAGTAGTGTCATGTACTCTAAATAAGAGGCTCAGTGTGAGAGTCTAATGAGAGTCGTCTTGTAAACAAGTCCCTGTACTTTGTTCGTGTGTTCGTGTGTATCAAGAGCCTGGTGTACTACTCGAAGGCATTCACCTTCGACTATTAAGGTACCTAATATAATCCAGGACTATGTTTGTATAATTATGTTCATGTTCTACTTTCTTTAC
>Chr05:58531603-58536533F
CAAAGGAATCTACATTATTGAAGATAAGACCAAACATTATCAAGAGTCTAAAGGCTCATCATGAAGGCCTTTTCAAAGTCAAAAGTATCATCATAATGCCCATAGATAGTCAAAAAGAGATATCATGAAGATGCTCCACTACTTTTGTGAAGTCAAAAAGATCATCATGAAGATTTCCCAATAAAGTATGACAAGGGTTAAAAGGACCATCATGAAGATGCACCAATAATGCAAGAAAAGAGTCAAAAGAGTCATCATGAAGATGCACCTCCACCAACAACCATATCCTTGCCACCCCTATATAAGAAGAGGAAGAGGCAAGAGGAGGGCACACACCAAAGCTCAAGCCCTAAAGATTGAGCACCATCCACCTAAGTATTGTAGTAGTGTCATGTACTCTAAATAAGAGGCTCAGTGTGAGAGTCTAATGAGAGTCGTCTTGTAAACAAGTCCCTGTACTTTGTTCGTGTGTTCGTGTGTATCAAGAGCCTGGTGTACTACTCGAAGGCATTCACCTTCGACTATCAAGGTACCTAATATAATCCATGACTATGTTTGTATAATTATGTTCATGTTCTACTTTATTTAT
>Chr06:31384129-31388146F
CAAAGGAATCTACATTATTGAAGATAAGACCAAACATTATCAAAAGTCTAAAGGCTCATCATGAAGGCCTTTTTGAAGTCAAAAGTATCATCATAATACCCATAGATAGTCAAAAAGAGATATCATGAAGATGCTCCACTACTTTTGTGAAGTCAAAAAGATCATCATGAAGATTCCCCAATAATGTATGACAAGGGTCAAGAAGACCATCATGAAGATGCACCAATAATGCAAGAAAAGAGTCAAAAGAGTCATCATGAAGATGCACCTCCACCAACAACCATATCCTTGCCACCCCTATATAAGAAGAGGAAGAGGCAAGAGGAGGGCACACACCCAAGCTCAAGCCCTTGGGCACGAGCACCATCCACCTAAGTATTATAGTAGTGTCATGTACTCTAAATAAGAGGCTCAGTGTGAGAGTCTAATGAGAGTCGTCTCGTAAACAAGTCCCTGTACTTTGTTCGTGTGTTCGTGTGTATCAAGAGCCTGGTGTACTACTCGAAGGCATTCACCTTCGACTATCAAGGTACCTAATATAATCCAGGACTATGTTTGTTTAATTATGTTCATGTTCTACTTTCTTTAC
>Chr06:37581137-37587995F
CAAAGGAATCTACATTATTGAAGATAAGACCAAACATTATCAAGAGTCTAAAGGCTCATCATGAAGGCCTTTTTGAAGTCAAAAGTATCATCATAATGCCCATAGATAGTCAAAAAGAGATATCATGAAGATGCTCCACTACTTTTGTGAAGTCAAAAAGATCATCATGAAGATTCCCCAATAATGTATAACAAGGGTCAAAAAGACCATCATGAAGATGCACCAATAATGCAAGAAAAG-GTCAAAAGAGTCATCATGAAGATGCACCTCCACCAACAATCATATCCTTGCCACCCCTATATAAGAAGAGGAAGAGGCAAGAGGAGGGCACACACCCAAGCTCAAGCCCTCAAGCTCGAGCACCAACCACCTAAGTATTGTAGTAGTGTCATGTACTCTAAATAAGAGGCTCAGTGTGAGAGTCTAATGAGAGTCGTCTTGTAAACAAGTCCCTGTACTTTGTTCGTGTGTTCGTGTGTATCAAGAGCCTGGTGTACTACTCGAAGGCATTCACCTTCGACTATCAAGGTACCTAATATAATCCAGGACTATGTTTGTATAATTGTGTTCATGTTCTACCTTCTTTAC
>Chr06:44423973-44430825R
CAAAGGAATCTACATTATTGAAGATAAGACCAAACATTATCAAGAGTCTAAAGGCTCATCATGAAGGCCTTTTTGAAGTCAAAAGTATCATCATAATACCCATAGATAGTCAAAAAGAGATATCATGAAGATGCTCCACTACTTTTGTGAAGTCAAAAAGATCATCATGAAGATTCTCCAATAATGTATGACAAGGGTCAAGAAGACCATCATGAAGATGCACCAATAATGCAAGAAAAGAGTCAAAAGAGTCATCATGAAGATGCACCTCCACCAACAACCATATCCTTGCCACCCCTATATAAGAAGAGGAAGAGGCAAGAGGAGGACACACACCCAAGCTCAAGCCCTCAAGCTCGAGCACCAACCACCTAAGTATTGTAGTAGTGTCATGTACTCTAAATAAGAGGCTCAGTGTGAGAGTCTAATGAGAGTCGTCTTGTATACAAGTCCCTGTACTTTGTTCGTGTGTTCGTGTGTATCAAGAGCCTGGTGTACTACTCGAAGGCATTCACCTTCGACTATCAAGGTACCTAATATAATCCAGGACTATGTTTGTATAATTGTGTTCATGTTCTACTTTCTTTAT
>super_19:796771-800729F
CAAAGGAATCTACATTATTGAAGAAAAGACCAAACATTATCAAGAGTCTAAAGGCTCATCATGAAGGCCTTTTCAAAGTCAAAAGTATCATCATAATGCCCATAGATAGTCAAAAAGAGATATCATGAAGATGCTCCACTACTTTTGTGAAGTCAAAAAGATCATCATGAAGATTCCCCAATAATGTATGACAAGGGTCAAAAAGACCATCATGAAGATGCACCAATAATGCAAGAAAAAAGTCAAAAGAGTCATCATGAAGATGCACCTCCACCAACAACCATATCCTTGCCACCCCTATATAAGAAGAGGAAGAGGCAAGAGGAGGGCACACACCCAAGCTCAAGCCCTTGGGCACGAGCACCATCCACCTAAGTATTGTAGTAGTGTCATGTACTCTAAATAAGAGGCTCAGTGTGAGAGTCTAATGAGAGTCGTCTTGTAAACAAGTCTCTGTACTTTGTTCGTGTGTTCGTGTGTATCAAGAGCCTGGTGTACTACTCGAAGGCATTCACCTTCGACTATCAAGGTACCTAATATAATCCAGGACTATGTTTATATAATTATGTTCATATTCTACTTTCTTTAT
>Chr01:54922322-54928778F
CAAAGGAATCTACATTATTGAAGATAAGACCAAACA---------GTCTAAAGGCTCATCATGAAGACCTTTTCAAAGTCAAAAGTATCATCATAATGCCCATAGATAGTCAAAAAGAGATATCATGAAGATGCTCCACTACTTTTGTGAAGTCAAAAAGATCATCATGAAGATTCCCCAATAATGTATGACAAGGGTCAAAAAGACCATCATGAAGATGCACCAATAATGCAAGAAAAAAGTCAAAAGAGTCATCATGAAGATGCACCTCCACCAATAACCATATCCTGGCCACCCCTATATAAGAAGAGGAAGAGGCAAGAGGAGGACACACACCCAAGCTCAAGCCCTCAAGCTCGAGCACCAACCACCTAAGTATTGTAGTAGTGTCATGTACTCTAAATAAGAGGCTCAGTGTGAGAGTCTAATGAGAGTCGTCTTGTAAACAAGTCCCTGTACTT--------TGTTCGTGTGTATCAAGAGCCTGGTGTACTACTCGAAGGCATTTACCTTCGACTATCAAGGTACCTAATATAATCCAGGACTATGTTTGTATAATTATGTTCATGTTCTACTTTCTTTAT
>Chr04:16773368-16779949F
CAAAGGAACCTACATTATTGAAGATAAGATCAAACTTTATCAAGAGTCTAAAGGCACATCATGAAGGACTTTACAAGGTCAAAAGTATCATCATAATGCCTATAGATAGTCAAAA-GAGATATCATGAAGACGCTCCACT---TTTGTGAAGTAAAAAAGGTCATCATGAAGATTCCCCAATAATGTATAACAAGAGTCAAAAAGACCATCATGAAGACGTACCAATACTGCATGAGAAGAGTCAAAAGAATCATCATGAAGATGCACCTCTACCAACAACCATATCCTTGCCACCCCTATATAAGGAGAGGAAGAGGCAAGAGGAGAGCACACACCCAAGCTCAAGCCCTCAAGCACGAGCACCATCCACCTAAGTATAGTAAGAGTGTCATGTATTTTGAATAAGAGACTCAGTGTGAGAGTCTAATGAGAGTCGTCTTGTAAACAAGTCCTTGTACTT--------TGTTCGTGTGTATCAAGAGCCTGGTGTACTACTCAAAGGCATTCACCTTCGACTATCAAGGTACCTAATATAATCCAAGACTATGTTTGTATAATTGTGTTCATGTTCTACTTTTTTTAC
>Chr06:37562692-37563756R
CAAAGGAACCTACATTATTAAAGATAAGGCCAA----------GGGTCCAAAGGCACATCATGAAGATCTTTACAACATCAAAAGTATCA---TAATGCCTATAGATAGTCAAAAAGAAATATCATGAAGATGCTCCACTTTTCTTTTGAAGTCAAAAAGGTCATCATGAAGATTCCCCAATAATGTATGACAAGGGTCAAAAAGACCATCATGAAGATGCACCAATAATCCATGAAAAGAGTCA-AAGAGTCATCATGAAGAGGCACCTCCACCAACAACCATATCCTTGCCACCCCTATATAAGAAGAGGAAGAGGCAAGAGGAGGG--------------------------------------------------------------------------------------------------------------------------------------------------------------------------------------------------------------------------------------------------------------------
>Chr10:16457225-16463710R
CAAAGGAATCTACATTATTGAAGATAAGACCAAACATTATCAAGAGTCTAAAGGCACATCATGAAGGCCTTGACAAAGTCAAAAGTATCATCATAATGCCTATAGATAGTCAAAAAGAGATATCATGAAGATGCTCCACTACTTTGGTGAAGTCAAAAAGGTCATCATGAAGATTCCCCAATAATGTATGACAAGAGTCAA-AAGATCATCATGAAGATGCACCAATAATGCAAGAAAAGAGTCAGAAGAATCATCATGAAGAGGCACCTCCACCAACAACCATATCCTTGCCACCCCTATATAAGAAGATGAAGAGGCAAGAGGAGAGCACACACCCAAGCTCAAGCCCTTGGGCACGAGCACCTTCCACCTAAGTATTGTAGTAGTGTCATATACTCTAAATAAGAGGCTTAGTGTGAGAGTCTAATGAGAGTCGTCTTGTAAACGAGTCCCTGTACTTTGTTCGTGTGTTCGTGTGTATCAAGAGCCTAGTGTACTACTCGAAGGCATTCACCTTCGACTATCAAGGTACCTAATATAATTCAGGACTATGTTTATATAATTGTGTTCACGTTCTACTTTATTTAC

#for S6 Fig. (ORFx)
>Chr10:9826161-9826653:-1
GGTATCAGAGCC-AGTCATCATAGAGAAATCAAATTCAGAAGCTAATATTAGAAAGGTAATTACTACCAAAGATAATCTGAATATAAGGTGTAGACTAAATCACATTGAAGACCATAGTTGCCACTCTAACAATAGTCAATTAAATTTAATTGTTGATCTGATATATAATTTTTATATAAATTGGGATAAAAAGCAGGAAGATTTAGAACGAAGGATTGAAGATTTGTTTAAAGAACGAAAGCAATCTGAAGAACAATATTTGCTTGTCAGTAATAAATTAAATTCAGTGCTAAAAGAGCTAGAGGAATATAAGATAAGGCAGAATAAGATATTACAAAACAGTGACTATATCAAAGAATTATTAGAAATAATAAATTCTAGTAAAGGAAAAGAGATAGTTTTGGCTTCAACAGGCATAATTACCTCGTCTCAAGCTATTAATTCAGAAAAATGGACCTATCTAGGAGTTTGTTTAGAAGAATAG
>Chr10:10422090-10422584:1
GGTATCAGAGCC-AGTCATCATAGAGAAATCAAATTCAGAAGCTAATATTGGAAAGATAATTACTACCAAAGATAATCTGAATATAAGGTGTAGATTAAATCACATTGAAGACCATAGTTGGCACTCTAACAATAGTCAATTAAATTTAATTGTTGATCTGATATATAATTTTTATATAAATTGGGATAAAAAGCAGGAAGATTTAAAGCGAAGGATTGAAGATTTGTTTAAAGAACGAAAGCAATCTGAAGAACAATATTTGCTTGTCAGTAATAAATTAAATTCAGTGCTAAAAGAGCTAGAGGATTATAAGATAAGGCAGAATAAGATATTACAAAACAGTGACTATATCAAAGAATTATTAGAAATAATAAATTCTAGTAAAGGAAAAGAGATAGGTTTGGCTTCAACAGGCATAATTACCTCGTCTCAAGCTATTAATTTAGAAAAATGGACCTATCTAGGAGTTTGTTTAGAAGAATAG
>Chr10:11382955-11383441:-1
GGTATCAGAGCCTGGTAATCATAGAGAAGCTAAATTTAGAAGCTAATATTGGAAAGTTAATAAATACCAAAGATAATATCAACATAAGGTGTAGACTAAGCCATACTGAAGAACATAGTTGGCACTCTAATAATAGCCAACTAAATTTAATTGTAGATTTAATATATAATTTCTATATAAATTGGAGTAAGAGACAAGAAGATTTAGAGCAAAAGTTAGAAGATATATATAAAGAACAAAAGCAATTTGTAGAACAATATTCTTTTCTTAATAATAAGCTAAATACTACATTAGAATTATTAGAAGATTATAAGATAAGGCAAAATAAAATTTCACAGAATAGTGATTATATTAAAGAATTACTAGACAAAATCAACTCTAGTAAAGGTAAGGAAATAGTTTTGGCTTCATCTGGCATAATCTCATCTTCACAAGCCATTAATTCTGAAAAATGGACATATCTAGGAGTCTCTTTAGAAGAATAG
>Chr10:14871605-14872100:-1
GGTATCAGAGCCTGGTAATCATAGAGAAGCTAAATTTAGAAGCTAATATTGGAAAGTTAATAAATACCAAAGATAATATCAACATAAGGTGTAGACTAAGCCATACTGAAGAACATAGTTGGCACTCTAATAATAGCCAACTAAATTTAATTGTAGATTTAATATATAATTTCTATATAAATTGGAGTAAGAGACAAGAAGATTTAGAGCAAAAGTTAGAAGATATATATAAAGAACAAAAGCAATTTGTAGAACAATATTCTTTTCTTAATAATAAGCTAAATACTACATTAGAATTATTAGAAGATTATAAGATAAGGCAAAATAAAATTTCACAGAATAGTGATTATATTAAAGAATTACTAGACAAAATCAACTCTAGTAAAGGTAAGGAAATAGTTTTGGCTTCATCTGGCATAGTCTCATCTTCACAAGCCATTAATTCTGAAAAATGGACATATCTAGGAGTCTCTTTAGAAGAATAG
>Chr10:22437444-22437930:-1
GGTATCAGAGCCTGGTAATCATAGAGAAGCTAAATTTAGAAGCTAATATTGGAAAGTTAATAAATACCAAAGATAATATCAACATAAGGTGTAGACTAAGCCATACTGAAGAACATAGTTGGCACTCTAATAATAGCCAACTAAATTTAATTGTAGATTTAATATATAATTTCTATATAAATTGGAGTAAGAGACAAGAAGATTTAGAGCAAAAGTTAGAAGATATATATAAAGAACAAAAGCAATTTGTAGAACAATATTCTTTTCTTAATAATAAGCTAAATACTACATTAGAATTATTAGAAGATTATAAGATAAGGCAAAATAAAATTTCACAGAATAGTGATTATATTAAAGAATTACTAGACAAAATCAACTCTAGTAAAGGTAAGGAAATAGTTTTGGCTTCATCTGGCATAATCTCATCTTCACAAGCCATTAATTCTAAAAAATGGACATATCTAGGAGTCTCTTTAGAAGAATAG
>Chr10:23216392-23216887:-1
GGTATCAGAGCCTGGTAATCATAGAGAAGCTAAATTTAGAAGCTAATATTGGAAAGTTAATAAATACCAAAGATAATATCGACATAAGGTGTAGACTAAGCCATACTGAAGAACATAGTTGGCACTCTAATAATAGCCAACTAAATTTAATTGTAGATTTAATATATAATTTCTATATAAATTGGAGTAAGAGACAAGAAGATTTAGAGCAAAAGTTAGAAGATATATATAAAGAACAAAAGCAATTTGTAGAACAATATTCTTTTCTTAATAATAAGCTAAATACTACATTAGAATTATTAGAAGATTATAAGATAAGGCAAAATAAAATTTCACAGAATAGTGATTATATTAAAGAATTACTAGACAAAATCAACTCTAGTAAAGGTAAGGAAATAGTTTTGGCTTCATCTGGCATAGTCTCATCTTCACAAGCCATTAATTCTGAAAAATGGACATATCTAGGAGTCTCTTTAGAAGAATAG
>Chr11:9669978-9670464:-1
GGTATCAGAGCCTGGTAATCATAGAGAAGCTAAATTTAGAAGCTAATATTGGAAAGTTAATAAATACCAAAGATAATATCAACATAAGGTGTAGACTAAGCCATACTGAAGAACATAGTTGGCACTCTAATAATAGCCAACTAAATTTAATTGTAGATTTAATATATAATTTCTATATAAATTGGAGTAAGAGACAAGAAGATTTAGAGCAAAAGTTAGAAGATATATATAAAGAACAAAAGCAATTTGTAGAACAATATTCTTTTCTTAATAATAAGCTAAATACTACATTAGAATTATTAGAAGATTATAAGATAAGGCAAAATAAAATTTCACAGAATAGTGATTATATTAAAGAATTACTAGACAAAATCAACTCTAGTAAAGGTAAGGAAATAGTTTTGGCTTCATCTGGCATAGTCTCATCTTCACAAGCCATTAATTCTGAAAAATGGACATATCTAGGAGTCTCTTTAGAAGAATAG
>Chr11:28350656-28351142:1
GGTATCAGAGCCTAGTAATCATAGAGAAGCTAAATTTAGAAGCTAATATTGGAAAGTTAATAAATACCAAAGATAATATCAATATAAGGTGTAGATTAAACCATACTGAAGAACATAGTTGGCACTCTAATAATAGCCAACTAAATTTAATTGTAGATTTAATATATAATTTCTATATAAATTGGGGTAAGAGACAGGAAGATTTAGAGCAAAAGTTTGAAGATATATATAAAGAACAAAAGCAATTTGTAGAACAATATTCTTTTCTTAGTAATAAGGTAAATACTACATTAGAATTATTAGAAGATTATAAGATAAGGCAAAATAAAATTTCACAGAATAGTGATTATATTAAAGAATTACTAGACAAAATCAACTCTAGTAAAGGTAAGGAAATAGTTTTGGCTTCATCCGGCATAGTCTCATCTTCACAAGCCATTAATTCTGAAAAATGGACATATCTAGGAGTCTCTTCAGAAGAATAG
>Chr12:18044809-18045295:1
GGTATCAGAGCCTGGTAATCATAGAGAAGCTAAATTTAGAAGCTAATATTGGAAAGTTAATAAATACCAAAGATAATATCAACATAAGGTGTAGACTAAGCCATACTGAAGAACATAGTTGGCACTCTAATAATAGCCAACTAAATTTAATTGTAGATTTAATATATAATTTCTATATAAATTGGAGTAAGAGACAGGAAGATTTAGAGCAAAAGTTAGAAGATATATATAAAGAACAAAAGCAATTTGTAGAACAATATTCTTTTCTTAATAATAAGCTAAATACTACATTAGAATTATTAGAAGATTATAAGATAAGGCAAAATAAAATTTCACAGAATAGTGATTATATTAAAGAATTACTAGACAAAATCAACTCTAGTAAAGGTAAGGAAATAGTTTTGGCTTCATCTGGCATAGTCTCATCTTCACAAGCCATTAATTCTGAAAAATGGACATATCTAGGAGTCTCTTTAGAAGAATAG
>Chr12:23146792-23147286:-1
GGTATCAGAGCC-AGTCATCATAGAGAAATCAAATTCAGAAGCTAATATTGGAAAGGTAATTACTACCAAAGATAATCTGAATATAAGGTGTAGGCTAAATCACATTGAAGACCATAGTTGGCACTCTAACAATAGTCAATTAAATTTAATTGTTGATCTGATATATAATTTTTATATAAATTGGGATAAAAAGCAGGAAGATTTAGAGCGAAGGATTGAAGATTTGTTTAAAGAACGAAAGCAATCTGAAGAACAATATTTGCTTGTCAGTAATAAATTAAATTCAGTGCTAAAAGAGCTAGAGGAATATAAGACAAGGCAGAATAAGATATTACAAAACAGTGACTATATCAAAGAATTATTAGAAATAATATATTCTAGTAAAGGAAAAGAGATAGTTTTGGCTTCAACAGGCATAATTACCTCGTCTCAAGCTATTAATTCAGAAAAATGGACCTATCTAGGAGTTTGTTTAGAAGAATAG
>Chr12:25300991-25301483:1
GGTATCAGAGCC-AGTCATCATAGAGAAATCAAATTCAGAAGCTAATATTGGAAAGATAATTACTACCAAAGATAATCTGAATATAAGGTGTAGATTAAATCACATTGAAGACCATAGTTGGCACTCTAACAATAGTCAATTAAATTTAATTGTTGATCTGATATATAATTTTTATATAAATTGGGATAAAAAGCAGGAAGATTTAGAGCGAAGGATTGAAGATTTGTTTAAAGAACGAAAGCAATCTGAAGAACAATATTTGCTTGTCAGTAATAAATTAAATTCAGTGCTAAAAGAGCTAGAGGAATATAAGATAAGGCAGAATAAGATATTACAAAACAGTGACTATATCAAAGAATTATTAGAAATAATAAATTCTAGTAAAGGAAAAGAGATAGTTTTGGCTTCAACAGGCATAATTACCTTGTCTCAAGCTATTAATTCAGAAAAATGGACCTATCTAGGAGTTTGTTTAGAAGAATAG
>Chr12:25994043-25994529:1
GGTATTAGAGCCTGGTAATCATAGAGAAGCTAAATTTAGAAGCTAATATTGGAAAGTTAATAAATACCAAAGATAATATCAACATAAGGTGTAGACTAAGCCATACTGAAGAACATAGTTGGCACTCTAATAATAGCCAACTAAATTTAATTGTAGATTTAATATATAATTTCTATATAAATTGGAGTAAGAGACAAGAAGATTTAGAGCAAAAGTTAGAAGATATATATAAAGAACAAAAGCAATTTGTAGAACAATATTCTTTTCTTAATAATAAGCTAAATACTACATTAGAATTATTAGAAGATTATAAGATAAGGCAAAATAAAATTTCACAGAATAGTGATTATATTAAAGAATTACTAGACAAAATCAACTCTAGTAAAGGTAAGGAAATAGTTTTGGCTTCATCTGGCATAATCTCATCTTCACAAGCCATTAATTCTGAAAAATGGACATATCTAGGAGTCTCTTTAGAAGAATAG
>Chr01:761017-761511:-1
GGTATCAGAGCC-AGTCATCATAGAGAAATCAAATTCAGAAGCTAATATTGGAAAGATAATTACTACCAAAGATAATCTGAGTATAAGGTGTAGATTAAATCACATTGAAGACCATAGTTGGCACTCTAACAATAGTCAATTAAATTTAATTGTTGATCTGATATATAATTTTTATATAAATTGGGATAAAAAGCAGGAAGATTTAGAGCGAAGGATTGAAGATTTGTTTAAAGAACGAAAGCAATCTGAAGAACAATATTTGCTTGTCAGTAATAAATTAAATTCAGTGCTAAAAGAGCTAGAGGATTATAAGATAAGGCAGAATAAGATATTACAAAACAGTGATTATATCAAAGAATTATTAGAAATAATAAATTCTAGTAAAGGAAAAGAGATAGTTTTGGCTTCAACAGGCATAATTACCTCGTCTCAAGCTATTAATTCATAAAAATGGACCTATCTAGGAGTTTGTTTAGAAGAATAG
>Chr02:9117881-9118375:1
GGTATCAGAGCC-AGTCATCATAGAGAAATCAAATTCAAAAGCTAATATTGGAAAGATAATTACTACCAAAGATAATCTGAATATAAGGTGTAGATTAAATCACATTGAAGACCATAGTTGGCACTCTAACAATAGTCAATTAAATTTAATTGTTGATCTGATATATAATTTTTATATAAATTGGGATAAAAAACAGGAAGATTTAGAGCGAAGGATTGAAGATTTGTTTAAAGAACGAAAGCAATCTGAAGAACAATATTTGCTTGTCAGTAATAAATTAAATTCAGTGCTAAAAGAGCTAGAGGATTATAAGATAAGGCAGAATAAGATATTACAAAACAGTGACTATATCAAAGAATTATTAGAAATAATAAATTCTAGTAAAGGAAAAGAGATAGTTTTGGCTTCAACAGGCATAATTACCTCGTCTCAAGCTATTAATTCAGAAAAATGGACCTATCTAGGAGTTTGTTTAGAAGAATAG
>Chr04:9829287-9829780:-1
GGTATCAGAGCC-AGTCATCATAGAGAAATCAAATTCAGAAGCTAATATTGGAAAGATAATTACTACCAAAGATAATCTGAATATAAGGTGTAGATTAAATCACATTGAAGACCATAGTTGGCACTCTAACAATAGTCAATTAAATTTAATTGTTGATCTGATATATAATTTTTATATAAATTGGGATAAAAAGCAGGAAGATTTAGAGCGAAGGATTGAAGATTTGTTTAAAGAACGAAAGCAATCTGAAGAACAATATTTGCTTGTCAGTAATAAATTAAATTCAGTGCTAAAAGAGCTAGAGGATTATAAGATAAGGCAGAATAAGATATTACAAAACAGTTACTATATCAAAGAATTATTAGAAATAATAAATTCTAGTAAAGGAAAAGAGATAGTTTTGGCTTCAACAGGCATAATTACCTCGTCTCAAGCTATTAATTCAGAAAAATGGACCTATCTAGGAGTTTGTTTAGAAGAATAG
>Chr04:18575198-18575610:1
------------------------------------------------------------------------ATAATATCAATATAAGGTGTAGATTAAGCCATACTGAAGAACATAGTTGGCACTCTAATAATAGCCAACTAAATTTAATTGTAGATTTAATATATAATTTCTATATAAATTGGGGTAAGAGACAGGAAGATTTAAAGCAAAAGTTTGAAGATATATATAAAGAACAAAAGCAATTTGTAGAACAATATTCTTTTCTTAGTAATAAGCTAAATACTACATTAGAATTATTAGAAGATTATAAGATAAGGCAAAATAAAATTTCACAAAATAGTGATTATATTAAAGAATTACTAGACAAAATCAACTCTAGTAAAAGTAAGGAAATAGTTTTGGCTTCATCCGGCATAGTCTCATCCTCACAAGCCATTAATTCTGAAAAATGGACATATCTAGGAGTCTCTTTAGAAGAATAG
>Chr04:20895333-20895814:1
GGTATCAGAGCC-AGTCATCATAGAGAAATCAAATTCAGAAGCTAATATTGGAAAGGTAATTACTATCAAAGATAATCTGAATATAAGGTGT----TAAATCACATTGAAGACCATAGTTGACACTCTAACAATAGTCAATTAATTTTAATTGTTGATCTGATATATAATTTTTATATAAATTGGGATAAAAAGCAGGAAGATTTAGAGCGAAGGTTTGAAGATTTGTTTAAAGAACGAAAGCAATCTGAAGAACAATATTTGCTTGTCAGTAATAAATTAAATTCAGTGCTAAAAGAGCTAGAGGAATATAAGATAAGGCAGAATAAGATATTACAAAACAGTGACTATATCAAAAAATTATTAGAAATAATAAATTCTAGTAAAGGAAAAGAGATAGTTTTGGCTTCAACAGGCATAATTACCTCGTCTCAAGCTATTAATTCAGAAAAATGGATCTATCTAGGAGTTTGTTTAGAAGAATAG
>Chr05:18272741-18273233:1
GGTATCAGAGCC-AGTCATCATAGAGAAATCAAATTCAGAAGCTAATATTGGAAAGGTAATTACTACCAAAGATAATCTGAATATAAGGTGTAGGCTAAATCACATTGAAGACCATAGTTGGCACTCTAACAATAGTCAATTAAATTTAATTGTTGATCTGATATATAATTTTTATATAAATTGGGATAAAAAGCAGGAAGATTTAGAGCGAAGGATTGAAGATTTGTTTAAAGAACGAAAGCAATCTGAAGAACAATATTTGCTTGTCAGTAATAAATTAAATTCAGTGCTAAAAGAGCTAGAGGAATATAAGATAAGGCAGAATAAGATATTATAAAACAGTGACTATATCAAAGAATTATTAGAAATAATAAATTCTAGTAAAGGAAAAGAGATAGTTTTGGCTTCAACAGGCATAATTATCTCGTCTCAAGCTATTAATTCAGAAAAATGGACCTATCTAGGAGTTTGTTTAGAAGAATAG
>Chr05:18282693-18283185:-1
GGTATCAGAGCT-AGTCATCATAGAGAAATCAAATTCAGAAGCTAATATTGGAAAGGTAATTACTACCAAAGATAATCTGAATATAAGGTGTAGACTAAATCACATTGAAGACCATAGTTGGCACTCTAACAATAGTCAATTAAATTTAATTGTTGATCTGATATATAATTTTTATATAAATTGGGATAAAAAGCAGGAAGATTTAGAGCGAAGGATTGAAGATTTGTTTAAAGAACAAAAGCAATCTGAAGAACAATATTTGCTTGTCAGTAATAAATTAAATTCAGTGCTAAAAGAGCTAGAGGAATATAAGATAAGGCAGAATAAGATATTACAAAACAGTGACTATATCAAAGAATTACTAGAAATAATAAATTCTAGTAAAGGAAAAGAGATAGTTTTGGCTTCAACATGCATAATTACCTCGTCTCAAGCTATTAATTCAGAAAAATGGACCTATCTAGGAGTTTGTTTAGAAGAATAG
>Chr05:19063255-19063747:-1
GGTATCAGAGCC-AGTCATCATAGAGAAATCAAATTCAGAAGCTAATATTGGAAAGGTAATTACTACCAAAGATAATCTGAATATAAGGTGTAGGCTAAATCACATTGAAGACCATAGTTGGCACTCTAACAATAGTCAATTAAATTTAATTGTTGATCTGATATATAATTTTTATATAAATTGGGATAAAAAGCAGGAAGATTTAGAGCGAAGGATTGAAGATTTGTTTAAAGAACAAAAGCAATCTGAAGAACAATATTTGCTTATCAGTAATAAATTAAATTCAGTGCTAAAAGAGCTAGAGGAATATAAGATAAGGCAGAATAAGATATTACAAAACAGTGACTATATCAAAGAATTACTAGAAATAATAAATTCTAGTAAAGGAAAAGAGATAGTTTTGGCTTCAACAGGCATAATTACCTCGTCTCAAGCTATTAATTCAGAAAAATGGACCTATCTAGGAGTTTGTTTAGAAGAATAG
>Chr06:1712496-1712987:-1
GGTATCAGAGCC-AGTCATCATAGAGAAATCAAATTCAGAAGCTAATATTGGAAAGGTAATTACTACCAAAGATAATCTGAATATAAGGTGTAGGCTAAATCACATTGAAGACCATAGTTGGCACTCTAA-AATAGTCAATTAAATTTAATTGTTGATCTGATATATAATTTTTATATAAATTGGGATAAAAAGCAGGAAGATTTAGAGCGAATGATTGAAGATTTGTTTAAAGAACGAAAGCAATCTGAAGAACAATATTTGCTTGTCAGTAATAAATTAAATTCAGTGCTAAAAGAGCTAGAGGAATATAAGATAAGGCAGAATAAGATATTACAAAACAGTGACTATATCAAAGAATTATTAGAAATAATAAATTCTAGTAAAGGAAAAGAGATAGTTTTGGCTTCAACAGGCATAATTACCTCGTCTCAAGCTATTAATTCAGAAAAATGGACCTATCTAGGAGTTTGTTTAGAAGAATAG
>Chr06:10573839-10574325:1
GGTATCAGAGCCTGGTAATCATAGAGAAGCTAAATTTAGAAGCTAATATTGGAAAGTTAATAAATACCAAAGATAATATCAACATAAGGTGTAGATTAAGCCATACTGAAGAACACAGTTGGCACTCTAATAATAGCCATCTAAATTTAATTGTAGATTTAATATATAATTTCTATATAAATTGGGGTAAGAGACAAGAAGATTTAGAGCAAAAGTTAGAATATATATATAAAGAACAAAAGCAATTTGTAGAACAATATTCTTTTCTTAATAATAAGCTAAATACTACATTAGAATTATTAGAAGATTATAAGATAAGGCAAAATAAAATTTCACAGAATAGTGATTATATTAAAGAATTACTAGACAAAATCAACTCTAGTAAAGGTAAGGAAATAGTTTTGGCCTCATCTGGCATAGTCTCATCTTCACAAGCCATTAATTCTGAAAAATGGACATATCTAGGAGTCTCTTTAGAAGAATAG
>Chr06:12690778-12691264:1
GGTATCAGAGCCTAGTAATCATAGAGAAGCTAAATTTAGAAGCTAATATTGGAAAGTTAATAAATACCAAAGATAATATCAATATAAGGTGTAGATTAAGCCATACTGAAGAACATAGTTGGCACTCTAATAATAGCCAACTAAATTTAATTGTAGATTTAATATATAATTTCTATATAAATTGGGGTAAGAGACAGGAAGATTTAGAGCAAAAGTTAGAAGATATATATAAAGAACAAAAGCAATTTGTAGAACAATATTCTTTTCTTAATAATAAGCTAAATACTACATTAGAATTATTAGAAGATTATAAGATAAGGCAAAATAAAATTTCACAGAATAGTGATTATATTAAAGAATTACTAGACAAAATCAACTCTAGTAAAGGTAAGGAAATAGTTTTGGCTTCATCCGGCATAGTCTCATCTTCACAAGCCATTAATTCTGAAAAATGGACATATTTAGGAGTCTCTTTAGAAGAATAG
>Chr07:2814958-2815452:1
GGTATCAGAGCC-AGTCATCATAGAGAAATCAAATTCAGAAGCTAATATTGGAAAGATAATTACTACCAAAGATAATCTGAGTATAAGGTGTAGATTAAATCACATTGAAGACCATAGTTGGCACTCTAACAATAGTCAATTAAATTTAATTGTTGATCTGATATATAATTTTTATATAAATTGGGATAAAAAGCAGGAAGATTTAAAGCGAAGGATTGAAGATTTGTTTAAAGAACGAAAGCAATCTGAAGAACAATATTTGCTTGTCAGTAATAAATTAAATTCAGTGCTAAAAGAGCTAGAGGATTATAAGATAAGGCAAAATAAGATATTACAAAACAGTGACTATATCAAAGAATTATTAGAAATAATAAATTATAGTAAAGAAAAAGAGATAGTTTTGGCTTCAACAGGCATAATTACCTCGTCTCAAGCTATTAATTCAGAAAAATGGACCTATCTAGGAGTTTGTTTAGAAGAATAG
>Chr07:6680751-6681245:-1
GGTATCAGAGCC-AGTCATCATAGAGAAATCAAATTCAGAAGCTAATATTGGAAAGATAATTACTACCAAAGATAATCTGAATATAAGGTGTAGATTAAATCACATTGAAGACCATAGTTAGCACTCTAACAATAGTCAATTAAATTTAATTGTTGATCTGATATATAATTTTTATATAAATTGGGATAAAAAGCAGGAAGATTTAGAGCGAAGGATTGAAGATTTGTTTAAAGAACGAAAGCAATCTGAAGAACAATATTTGCTTGTCAGTAATAAATTAAATTCAGTGCTAAAAGAGCTAGAGGAATATAAGACAAGGCAGAATAAGATATTACAAAACAGTGACTATATCAAAGAATTATTAGAAATAATAAATTCTAGTAAAGGAAAAGAGATAGTTTTGGCTTCAACAGGCATAATTACCTCGTCTCAAGCTATTAATTCAGAAAAATGGACCTATCTAGGAGTTTGTTTAGAAGAATAG
>Chr07:18558340-18558800:-1
------------------------AGAAGCTAAATTTAGAAGCTAATATTGGAAAGTTAATAAATACCAAAGATAATATCAACATAAGGTGTAGATTAAGCCATACTGAAGAACATAGTTGGCACTCTAATAATAGCCAACTAAATTTAATTGTAGATTTAATATATAATTTCTATATAAATTGGGGTAAGAGACAAGAAGATTTAGAGCAAAAGTTAGAAGATATATATAAAGAACAAAAGCAATTTGTAGAACAATATTCTTTTCTTAATAATAAGCTAAATACTACATTAGAATTATTAGAAGATTATAAGATAAGGCAAAATAAAATTTCACAGAATAGTGATTATATTAAAGAATTACTAGACAAAATCAACTCTAGTAAAGGTAAGGAAATAGTTTTGGCTTCATCTGGCATAGTCTCATCTTCACAAGCCATTAATTCTGAAAAATGGACATATCTAGGAGTCTCTTTAGAAGAATAG
>Chr08:4251965-4252459:-1
GGTATCAGAGCC-AGTCATTATAGAGAAATCAAATTCAGAAGCTAATATTGGAAAGATAATTACTACCAAAGATAATTTGAATATAAGGTGTAGATTAAATCACATTGAAGACCATAGTTGGCACTCTAACAATAGTCAATTAAATTTAATTGTTGATCTGATATATAATTTTTATATAAATTGGGATAAAAAGCAAGAAGATTTAGAGCGAAGGTTTGAAGATTTGTTTAAAGAACGAAAGCAATCTGAAGAACAATATTTGCTTGTCAGTAATAAATTAAATTCAGTGCTAAAAGAGCTAGAGGATTATAAGATAAGGCAGAATAAGATATTACAAAACAGTGACTATATCAAAGAATTATTAGAAATAATAAATTCTAGTAAAGGAAAAGAGATAGTCTTGGCTTCAACAGGCATAATTACCTCGTCTCAAGCTATTAATTCAGAAAAATGGACCTATCTAGGAGTTTGTTTAGAAGAATAG
>Chr08:11282378-11282867:1
GGTATCAGAGCC-AGTCATCATAGAGAAATCAAATTCAGAAGCTAATATTGGAAAGGTAATTACTACCAAAGATAATTTGAATATAAGGTGTAGGCTTAATCACATTGAAGACCATAGTTGGCACTCTAACAATAGTCAATTAAATTTAATTGTTGATCTGATATATAATTTTTATATAAATTGGGATAAAAAGCAAGAAGATTTAGAGCGAAGGATTGAAGATTTGTTTAAAGAACGAAAGCAATCTGAAGAACAATATTTGCTTGTCAGTAATAAATTAAATTCAGTGCTAAAAGAGTTAGAGGAATATAAGACAAGGCAGAATAAGATATTACAAAACAGTGACTATATCAAAGAATTATTAGAAATAATAAATTCTAGTAAAGGAAAAGAGATAGTTTTGGCTTCAACAGGCATAATTACCTCGTCTCAAGCTATTAATTCAGAAAAATGGACCTATCTAGGAGTTTGTTTAGAAGAATAG
>Chr08:11302962-11303450:1
GGTATCAGAGCC-AGTCATCATAGAGAAATCAAATTCAGAAGCTAATATTGGAAAGGTAATTACTACTAAAGATAATTTGAATATAAGGTGTAGACTAAATCATATTGAAGACCATAGTTGGCACTCTAACAATAGTCAATTAAATTTAATTGTTGATCTGATATATAATTTTTATATAAATTGGGATAAAAAGCAGGTAGATTTAGAGCAAAAGTTAGAAGATATATATAAAGAACAAAAGCAATTTGTAGAACAATATTCTTTTCTTAATAATAAGCTAAATACTACATTAGAATTATTAGAAGATTATAAGATAAGGCAAAATAAAATTTCACAGAATAGTGATTATATTAAAGAATTACTAGACAAAATCAACTCTAGTAAAGGTAAGGAAATAGTTTTGGCTTCATCTGGCATAG-CTCGTCTTCACAAGCCATTAATTCTGAAAAATGGACATATCTAGGAGTCTCTTTAGAAGAATAG
>Chr08:11307141-11307631:1
GGTATCAGAGCCTGGTAATCATAGAGAAGCTAAATTCAGAAGCTAATATTGGAAAGGTAATTACTACTAAAGATAATTTGAATATAAGGTGTAGACTAAATCATATTGAAGACCATAGTTGGCACTCTAACAATAGTCAATTAAATTTAATTGTTGATCTGATATATAATTTTTATATAAATTGGGATAAAAAGCAGGTAGATTTAGAGCAAAAGTTAGAAGATATATATAAAGAACAAAAGCAATTTGTAGAACAATATTCTTTTCTTAATAATAAGCTAAATACTACATTAGAATTATTAGAGGATTATAAGATAAGGCAAAATAAAATTTCACAGAATAGTGATTATATTAAAGAATTACTAGACAAAATCAACTCTAGTAAAGGTAAGGAAATAGTTTTGGCTTCATCTGGCATAGTCTCGTCTTCACAAGCCATTAATTCTGAAAAATGGACATATCTAGGAGTCTCTTTAGAAGAATAG
>Chr08:11311322-11311812:1
GGTATCAGAGCCTGGTAATCATAGAGAAGCTAAATTCAGAAGCTAATATTGGAAAGGTAATTACTACTAAAGATAATTTGAATATAAGGTGTAGACTAAATCATATTGAAGACCATAGTTGGCACTCTAACAATAGTCAATTAAATTTAATTGTTGATCTGATATATAATTTTTATATAAATTGGGATAAAAAGCAGGTAGATTTAGAGCAAAAGTTAGAAGATATATATAAAGAACAAAAGCAATTTGTAGAACAATATTCTTTTCTTAATAATAAGCTAAATACTACATTAGAATTATTAGAAGATTATAAGATAAGGCAAAATAAAATTTCACAGAATAGTGATTATATTAAAGAATTACTAGACAAAATCAACTCTAGTAAAGGTAAGGAAATAGTTTTGGCTTCATCTGGCATAGTCTCGTCTTCACAAGCCATTAATTCTGAAAAATGGACATATCTAGGAGTCTCTTTAGAAGAATAG
>Chr08:11315503-11315993:1
GGTATCAGAGCCTGGTAATCATAGAGAAGCTAAATTCAGAAGCTAATATTGGAAAGGTAATTACTACTAAAGATAATTTGAATATAAGGTGTAGACTAAATCATATTGAAGACCATAGTTGGCACTCTAACAATAGTCAATTAAATTTAATTGTTGATCTGATATATAATTTTTATATAAATTGGGATAAAAAGCAGGTAGATTTAGAGCAAAAGTTAGAAGATATATATAAAGAACAAAAGCAATTTGTAGAACAATATTCTTTTCTTAATAATAAGCTAAATACTACATTAGAATTATTAGAAGATTATAAGATAAGGCAAAATAAAATTTCACAGAATAGTGATTATATTAAAGAATTACTAGACAAAATCAACTCTAGTAAAGGTAAGGAAATAGTTTTGGCTTCATCTGGCATAGTCTCGTCTTCACAAGCCATTAATTCTGAAAAATGGACATATCTAGGAGTCTCTTTAGAAGAATAG
>Chr08:11330914-11331403:-1
GGTATCAGAGCC-AGTCATCATAGAGAAATCAAATTCAGAAGCTAATATTGGAAAGGTAATTACTACCAAAGATAATTTGAATATAAGGTGTAGGCTTAATCACATTGAAGACCATAGTTGGCACTCTAACAATAGTCAATTAAATTTAATTGTTGATCTGATATATAATTTTTATATAAATTGGGATAAAAAGCAGGAAGATTTAGAGCAAAGGATTGAAGATTTGTTTAAAGAACGAAAGCAATCTGAAGAACTATATTTGCTTGTCAGTAATAAATTAAATTCAGTGCTAAAAGAGCTAGAGGAATATAAGACAAGGCAGAATAAAATATTACAAAACAGTGACTATATCAAAGAGTTATTAGAAATAATAAATTCTAGTAAAGGAAAAGAGATAGTTTTGGCTTCAACAGGCATAATTACCTCGTCTCAAGCTATTAATTCAGAAAAATGGACCTATCTAGGAGTTTGTTTAGAAGAATAG
>Chr08:20264203-20264689:1
GGTATCAGAGCCTAGTAATCATAGAGAAGCTAAATTTAGAAGCTAATATTGGAAAGTTAATAAATATCAAAGATAATATCAATATAAGGTGTAGATTAAGCCATACTGAAGAACATAGTTGGCACTCTAATAATAGCCAACTAAATTTAATTGTAGATTTAATATATAATTTCTATATAAATTGGGGTAAGAGACAGGAAGATTTAGAGCAAAAGTTAGAAGATATATATAAAGAACAAAAGCAATTTGTAGAACAATATTCTTTTCTTAATAATAAGCTAAATACTACATTAGAATTATTAGAAGATTATAAGATAAGGCAAAATAAAATTTCATAGAATAGTGATTATATTAAAGAATTACCAGACAAAATCAACTCTAGTAAAGGTAAGGAAATAGTTTTGGCTTCATCCGGCATAGTCTCATCTTCACAAGCCATTAATTCTGAAAAATGGACATATCTAGGAGTCTCTTTAGAAGAATAG
>Chr08:21350301-21350786:-1
GGTATGAGAGCC-AGTCATCATAGAGAAATCAAATTCAGAAGCTAATATTGGAAAGGTAATTACTACCAAAGATAATCTGAATATAAGGTGTAGACTAAATCACATTGAAGACCATAGTTGGCACTCTAACAATAGTCAATTAAATTTAATTGTTGATCTGATATATAATTTTTATATAAATTGGGATAAAAAGCAGGAAGATTTAGAGCGAAGGATTGAAGATTTGTTTAAAGAACGAAAGCAATCTAAAGAACAATATTTGCTTGTAAGTAAAAAATTATATTCTGTGCTAAAAGAGCTAGAGGAATATAAGATAAGGCAGAATAAAATATTACAAAACAGTGACTATATCAAAGAATTATTAGAAATAATAAATTCTAGTAAAGGAAAAGAGATAGTTTTGGCTTCAACAGGCATAATTACCTCGTCTCAAGCTATTAATTCAGAAAAATGGACCTATCTAGGAGTTTGTTTAGAAGAATAG
>Chr08:25011314-25011808:-1
GGTATCAGAGCC-AGTCATCATAGAGAAATCAAATTCAGAAGCTAATATTGGAAAGGTAATTACTACCAAAGATAATCTGAATATAAGGTGTAGGCTAAATCACATTGAAGACCATAGTTGGCACTCTAACAATAGTCAATTAAATTTAATTGTTGATCTGATATATAATTTTTATATAAATTGGGATAAAAAGCAGGAAGATTTAGAGCGAAGGATTGAAGATTTGTTTAAAGAACGAAAGCAATCTGAAGAACAATATTTGCTTGTCAGTAATAAATTAAATTCAGTGCTAAAAGAGCTAGAGGAATATAAGACAAGGCAGAATAAGATATTACAAAACAGTGACTATATCAAAGAATTATTAGAAATAATAAATTCTAGTAAAGGAAAAGAGATAGTTTTGGCTTCAACAGGCATAATTACCTCATCTCAAGCTATTAATTCAGAAAAATGGACCTATCTAGGAGTTTGTTTAGAAGAATAG
>Chr08:11163841-11164331:1
GGTATCAGAGCCTGGTAATCATAGAGAAGCTAAATTTAGAAGCTAATATTGGAAAGGTAATTACTACCAAAGATAATCTGAATATAAGGTGTAGGCTAAATCACATTGAAGACCATAGTTGGCACTCTAACAATAGTCAATTAAATTTAATTGTTGATCTGATATATAATTTTTATATAAATTGGGATAAAAAGCAAGAAGATTTAGAGCGAAGGATTGAAGATTTGTTTAAAGAACGAAAGCAATCTGAAGAACTATATTTGCTTGTCAGTAATAAATTAAATTCAGTGCTAAAAGAGCTAGAGGAATATAAGACAAGGCAGAATAAAATATTACAAAACAGTGACTATATCAAAGAGTTATTAGAAATAATAAATTCTAGTAAAGGAAAAGAGATAGTTTTGGCTTCAACAGGCATAATTACCTCGTCTCAAGCTATTAATTCTGAAAAATGGACATATCTAGGAGTCTCTTTAGAAGAATAG
>Chr08:11260951-11261441:1
GGTATCAGAGCCTGGTAATCATAGAGAAGCTAAATTCAGAAGCTAATATTGGAAAGGTAATTACTACTAAAGATAATTTGAATATAAGGTGTAGACTAAATCATATTGAAGACCATAGTTGGCACTCTAACAATAGTCAATTAAATTTAATTGTTGATCTGATATATAATTTTTATATAAATTGGGATAAAAAGCAGGTAGATTTAGAGCAAAAGTTAGAAGATATATATAAAGAACAAAAGCAATTTGTAGAACAATATTCTTTTCTTAATAATAAGCTAAATACTACATTAGAATTATTAGAAGATTATAAGATAAGGCAAAATAAAATTTCACAGAATAGTGATTATATTAAAGAATTACTAGACAAAATCAACTCTAGTAAAGGTAAGGAAATAGTTTTGGCTTCATCTGGCATAGTCTCGTCTTCACAAGCCATTAATTCTGAAAAATGGACATATCTAGGAGTCTCTTTAGAAGAATAG
>Chr08:11275207-11275701:1
GGTATCAGAGCC-AGTCATCATAGAGAAATCAAATTCAGAAGCTAATATTGGAAAGGTAATTACTACTAAAGATAATTTGAATATAAGGTGTAGACTAAATCATATTGAAGACCATAGTTGGCACTCTAACAATAGTCAATTAAATTTAATTGTTGATCTGATATATAATTTTTATATAAATTGGGATAAAAAGCAGGTAGATTTAGAGCAAAAGTTAGAAGATATATATAAAGAACAAAAGCAATTTGTAGAACAATATTCTTTTCTTAATAATAAGCTAAATACTACATTAGAATTATTAGAAGATTATAAGATAAGGCAAAATAAAATTTCACAGAATAGTGATTATATTAAAGAATTACTAGACAAAATCAACTCTAGTAAAGGTAAGGAAATAGTTTTGGCTTCAACAGGCATAATTACCTCGTCTCAAGCTATTAATTCAGAAAAATGGACCTATCTAGGAGTTTGTTTAGAAGAATAG
>Chr09:1115771-1116266:-1
GGTATCAGAGCCTGGTAATCATAGAGAAGCTAAATTTAGAAGCTAATATTGGAAAGTTAATAAATACCAAAGATAATATCAACATAAGGTGTAGACTAAGCCATACTGAAGAACATAGTTGGCACTCTAATAATAGCCAACTAAATTTAATTGTAGATTTAATATATAATTTCTATATAAATTGGAGTAAGAGACAAGAAGATTTAGAGCAAAAGTTAGAAGATATATATAAAGAACAAAAGCAATTTGTAGAACAATATTCTTTTCTTAATAATAAGCTAAATACTACATTAGAATTATTAGAAGATTATAAGATAAGGCAAAATAAAATTTCACAGAATAGTGATTATATTAAAGAATTACTAGACAAAATCAACTCTAGTAAAGGTAAGGAAATAGTTTTGGCTTCATCTGGCATAGTCTCATCTTCACAAGCCATTAATTCTGAAAAATGGACATATCTAGGAGTCTCTTTAGAAGAATAG
>Chr09:15201317-15201806:1
GGTATCAGAGCC-AGTCATTATAGAGAAATCAAATTCAGAAGCTAATATTGGAAAGGTAATTACTACCAAAGATAATCTGAATATAAGGTGTAGATTAAATCACATTGAAGACCATAGTTAGCACTCTAACAATAGTCAATTAAATTTAATTGTTGATCTGATATATAATTTTTATATAAATTGGGATAAAAAGCAGGAAGATTTAGAGCGAAGGATTGAAGATTTGTTTAAAGAACGAAAGCAATCTGAAGAACAATATTTGCTTGTCAGTAATAAATTAAATTCAGTGCTAAAAGAGCTAGAGGAATATAAGACAAGGCAGAATAAGATATTACAAAACAGTGACTATATCAAAGAATTATTAGAAATAATAAATTCTAGTAAAGGAAAAGAGATAGTTTTGGCTTCAACAGGCATAATTACCTCGTCTCAAGCTATTAATTCAGAAAAATGGACCTATCTAGGAGTTTGTTTAGAAGAATAG
>Chr09:15208862-15209356:1
GGTATCAGAGCC-AGTCATTATAGAGAAATCAAATTCAGAAGCTAATATTGGAAAGATAATTACTACCAAAGATAATCTGAATATAAGGTGTAGATTAAATCACATTGAAGACCATAGTTGGCACTCTAACAATAGTCAATTAAATTTAATTGTTGATCTGATATATAATTTTTATATAAATTGGGATAAAAAGCAGGAAGATTTAGAGCGAAGGTTTGAAGATTTGTTTAAAGAACGAAAGCAATCTGAAGAACAATATTTGCTTGTCAGTAATAAATTAAATTCAGTGCTAAAAGAGCTAGAGGATTATAAGATAAGGCAGAATAAGATATTACAAAACAGTGACTATATCAAAGAATTATTAGAAATAATAAATTCTAGTAAAGGAAAAGAGATAGTTTTGGCTTCAACAGGCATAATTACCTCGTCTCAAGCTATTAATTCAGAAAAATGGACCTATCTAGGAGTTTGTTTAGAAGAATAG
>Chr09:16867563-16868052:1
GGTATCAGAGCC-AGTCATCATAGAGAAATCAAATTCAGAAGCTAATATTGGAAAGATAATTACTACCAAAGATAATCTGAATATAAGGTGTAGATTAAATCACATTGAAGACCATAGTTGGCACTCTAACAATAGTCAATTAAATTTAATTGTTGATCTGATATATAATTTTTATATAAATTGGGATAAAAAGCAGGAAGATTTAGAGCGAAGGATTGAAGATTTGTTTAAAGAACGAAAGCAATCTGAAGAACAATATTTGCTTGTCAGTAATAAATTAAATTCAGTGCTAAAAGAGCTAGAGGAATATAAGACAAGGCAGAATAAGATATTACAAAACAGTGACTATATCAAAGAATTATTAGAAATAATAAATTCTAGTAAAGGAAAAGAGATAGTTTTGGCTCCAACAGGCATAATTACCTCGTCTCAAGCTATTAATTCAGAAAAATGGACCTATCTAGGAGTTTGTTTAGAAGAATAG

#for S6 Fig. (MP)
>Chr10:9823466-9824587:-1
---------------------------------------------------------------------------------------------------------------------------------------------------------------------------------------------------------------------------------------------------------------------------------------------ATAAATATATTCACCAAGTTATGTATATAATAGGAATCAAAGGTATGACAAGAAAGAAATTAAGAGCTAAAGTTTTAATAACTCTGTTAGATAAAATGTGGGACACAATAGATAAAGCAGCATTAGGATTTTTAGAAAGTGATATGAATGAGAATATGTTGATAACATATATAGCCCCAGATCTAATGATGCCTATAAAAGAATTTATAGATAAAATAAGTTTTGGTTTTCAAACAAAGGGATACGAAGAATTTAAAGGAACAAATTTGCTAGTAAGCATAGAATTTATAGGAAGATTAACTAATAGAAGTGCCTCCAAATACAAAATAAATGCAAATGACGTGATTGAAAATATGCACTCTAAGGGAATAACTTTCATGAGCCCTTTAAAAATAAGTTCTGAAGAAAGGGCAGGAGAAGAATGGAAAATTAGTGATTTAATTGAAAGCAAAACTTTGAGTCAGCCTGAAAATTATATAAGTTATCAAAACAGTAAAAGAAATACCAGCATTAGATTTATAAATTACAAACCCAGAACCACAGATGACTTAGAAACAGAAGCATCTGATAGAAATATAATAGATAATAGAAGACATAGTGTTTCAGAGTTTATGGAAAAGTTAGATCAAGAAAGTGAGATAAAATATTACGAAAATAAATTAAAGGAAATAAATGAAGAATATAATAACTCTATGAAGTGTGAGTGGACTAAAATAAGAGATAAAGAACTTTATTTCTATAAAGAATTAGCTAGAGTAAAGAAAGTAAAGAAGAACGAAGATATGGCAGTAGAAATTTTTAAAAACCAAGAAACCAAGATAGAACAGATAAAGAGGAAAGAGAAAGATAAGTATTGCAAAGAAGAGCAAAATCTTGGTAAAATTTTAAGTGAAGAAGAGCAATGGGCAGAGAATGAAAGATTATTTCTTGAAAGTTATGAAGAAGAAATTAATCTAATAAATGAGATGGAGAATATAGAAAATGAAATAGACAATGCAGAACAATATAATGATTTTATAAACACATTAGATGAAGTAGGGTTACATAATCTTGATAATGCAATGGAAGCTATGGAAGTGGACTTAGGAACAGGAAAGAGAAAAAGATATGGAGAAGGTACTG
>Chr10:10422585-10423991:1
CAAGCAGAGACGATAAATCTTTAAGTTGTATTGATAAACAAAAAGGTAAAAATGAAGACATAGATGAGATTGAAGATATTGCAGAAGTAGACAAACAGCTCGAAAGATATCAAAGAGATACTCTGAGGGCAATAAGACCTCAACAAATATATTGCATGGGATTTTTTGAGAATAAAAAAGGGTTATACAGAATATCTAGAGAAGTAGAGTTAAGCGTTTTAACAAAGCCAGTTGAGTTAAAAATTGTAGCTAAGGAATTTGAAAATGGATTAAAGTATTCAGG-TATAGATATATTCACCAGGGTATGTATATAATAGGAATCAAAGGTATGACAAGAAAGAAATTAGGAGCTAAAGTTTTAATAACTCTGTTAGATAAAAGGTGGGACACAATAGATAAAGCAGCATTAGGATTTTTAGAAGGTGACATGAATGAGAATATGTTGATAACATATATAGCCCCAGATCTAATGATGCCTATAAAAGAATTTATAGATAAAATGAGTTTTGGTTTTCAAACAAAGGGATACGAGGAATTTAAAGGAACAAATTTGCTAGTAAGCATAGAATTTATAGGAAGATTAACTAATAGAAGTGCCTCCAAATACAAAATAAATGTAAATGACGTGATTGAAAATATGCACTCTAAGGGAATAACTTTCATGAGCCCTTTAAAAATAAGTTCTGAAGAAAGGGCAGGAGAAGAATGGAAAATTAGTGATTTAATTGAAAGCAAAACTTTGAGTCAGCCTGAAAATTATATAAGTTATCAAAATAGTAAAGGAAATACCAGCATTAGATTTATAAATTACAAACCCAGAACCACATATGACTTAGAAACAGAAGCATCTGATAGAAATATAATAGATAATAGAAGACATAGTGTTTCAGAGTTTATGGAAAAATTAGATCAAGAAAGTGAGATAAAATATTACGAAAATAAATTAAAGGAAATAAATGAAGAATATAATAACTCTATGAAATGTGAGTGGCCTAAAATAAGAGATAAAGAACTTTATTTCTATAGAGAATTAGCTAGAGTAAAGAAAGTAAAGAAGAACGAAGATATGGCAGTAGAAATTTTTAAAAACCAAGAAACCAAGATAGAACAGATAAAGAGGAAAGAGTAAGATAAGCATGGCAAAGAAGAGCAAAATCTTGGTAAAATTTTAAGTGAAGAAGAGCAATGGGCAGAGAATGAAAGATTATTTCTTGAAAGTTATGAAGAAGAAATTAATCTAATAAATGAGATGGAGAACATAGAAAATGAAATAGATAATGCAGAACAATATAATGATTTTATAAACACATTAGATGAAGTAGGGTTACATAATCTTGATAATGCAATGGAAGCTATGGAAGTGGACTTAGGAACAGGAAAGAGAAAAAGATATGGAGAAGGTACTG
>Chr10:11381571-11382954:-1
CAAGCAGAGATGATAA---------CTGTTCTGATAAACAAAAAGGCAAATATGATGACATAGATGAGCTGAAAGATGTTGCACAAGTAGATAAGCAGCTCGAAAGATATCAACGAGATACTTTAAGGGCAATAAGGCCTCAACAAGTATACTGCATGGGATTTTTTGAGAATAAGAATGGGCTTTATAGAATATCTAGAGAACTAGAATTAAGTGTTCTAACAAAGCCACTAGAATTAAAAATAGTAGCTAAAGAATTTGAAAATAGTTTAAAATATTCAGGATATAAGTATATTCACCAAGGTATGTACATAATAGGAATCAAAGGAATGACAAGAAAGAAATTAGGAGCTAAAGTGCTAATAACCTTATTAGATAAAAGATGGGACACAATAAACAAAGCATCTTTAGGCTATCTAGAAGGAGATATGAATGAAAATATGTTGATAACCTATATAGCGCCTGATTTAATGATGCCTGTAAATGAATTCATAGATAAAATGAGTTTTGGTTTCCAAACAAAAGGATACGAAGAGTTTAAGGGAACAAATTTATTAATAAGTATAGAATTTATAGAAAGATTGACTAATAGAAGTGCCTCCAAATACAAAATCAATGTAAATGATGTGATAGAAAAAATGCATTCTAAAGGAATAAAATTCATGAGCCCTTTAATAATAGACTCTGAAGAAAGAGCAGGAGAAAAATGGCCAATTAGTGAATTTATAAAAAATAAAACCTTGAGTCAGCCTGAAAACTTCATAAGTTACCAAGACAGCAAAGGGAATGTTAGTATTAGATTTACAAATTATAAAACCAGAGCTTCGGATGATTTGGATGCAGAATCATCTGACAGAGATATTATAGATAACAGAAGACATAGTATATCTGAATTGATGGAAAAATTAGACCATGAAAGTGAAATAAAATATTATGAAGATAAATTAAGAGATATAGCAGATGAATATAATAACTCTATGAAAAGTGAGTGGCCTAAAATTAGAGACAAGGAACTTTATTTCTATAGAGAACTATCCAGGATTAAGAAAAAAAAAA--GAGAAAAGCTTGGCCATAGAAACCCCCAGAACCCAGGAAATTAAAATAGAACAAATAAA---------GTCAGAAGAACCAAGAGAAGAAATCCAAAAGTTAGATAAGGTATTAAGTGAGGAAGAGCAATGGGAAGTAAATGAGAAATTATTACTAGAGAGTTATGAAGAAGAAAACAACCTGATAGAGGAAATAGAGAATATAGAA---GAAGAAGATAATGCAGAACAATATAATGATTTTATAGACTCATTGGATGAGGAAGGTTTGCATAATCTAGATAATGCAATGGAAGCTATGGAAGTAGATTTGGGAACAGGAAAAAGGAAAAGATACGGAGAGGGTTCTG
>Chr10:14870219-14871604:-1
CAAGCAGAGATGATAA---------CTGTTCTGATAAACAAAAAGGCAAATATGATGACATAGATGAGCTGAAAGATGTTGCACAAGTAGATAAGCAGCTCGAAAGATATCAACGAGATACTTTAAGGGCAATAAGGCCTCAACAAGTATACTGCATGGGATTTTTTGAGAATAAGAATGGGCTTTATAGAATATCTAGAGAAGTAGAATTAAGTGTTCTAACAAAGCCAGTAGAATTAAAAATAGTAGCTAAAGAATTTGAAAATAGTTTAAAATATTCAGGATATAAGTATATTCACCAAGGTATGTACATAATAGGAATCAAAGGAATGACAAGAAAGAAATTAGGAGCTAAAGTGCTAATAACCTTATTAGATAAAAGATGGGACACAATAAACAAAGCATCTTTAGGCTATCTAGAAGGAGATATGAATGAAAATATGTTGATAACCCATATAGCGCCTGATTTAATGATGCCTGTAAATGAATTCATAGATAAAATGAGTTTTGGTTTCCAAACAAAAGGATACGAAGAGTTTAAGGGAACAAATTTATTAATAAGTATAGAATTTATAGGAAGATTGACTAATAGAAGTGCCTCCAAATACAAAATCAATGTAAATGATGTGATAGAAAAAATGCATTCTAAAGGAATAAAATTCATGAGCCCTTTAATAATAGACTCTGAAGAAAGAGCAGGAGAAAAATGGCCAATTAGTGAATTTATAAAAAATAAAACCTTGAGTCAGCCTGAAAACTTCATAAGTTACCAAGACAGCAAAGGGAATGTTAGTATTAGATTTACAAATTATAAAACCAGAGCTTCGGATGATTTGGATGCAGAATCATCTGACAGAGATATTATAGATAACAGAAGACATATTATATCTGAATTGATGGAAAAATTAGACCATGAAAGTGAAATAAAATATTATGAAGATAAATTAAGAGATATAGCAGATGAATATAATAACTCTATGAAAAGTGAGTGGCCTAAAATTAGAGACAAGGAACTTTATTTCTATAGAGAACTATCCAGGATTAAGAAACAAAAAAAAGAGAAAAGCTTGGTCATAGAAACCCCGAGAACCCAGGAAATTAAAATAGAACAAATAAA---------GTCAGAAGAACCAAGAGAAGAAATCCAAAAGTTAGATAAGGTATTAAGTGAGGAAGAGCAATGGGAAGTAAATGAGAAATTATTACTAGAGAGTTATGAAGAAGAAAACAACCTGATAGAGGAAATAGAGAATATAGAA---GAAGAAGATAATGCAGAACAATATAATGATTTTATAGACTCATTGGATGAGGAAGGTTTGCATAATCTAGATAATGCAATGGAAGCTATGGAAGTAGATTTGGGAATAGGAAAAAGGAAAAGATACGGAGAGGGTTCTG
>Chr10:22436058-22437443:-1
CAAGCAGAGATGATAA---------CTGTTCTGATAAACAAAAAGGCAAATATGATGACATAGATGAGCTGAAAGATGTTGCACAAGTAGATAAGCAGCTCGAAAGATATCAACGAGATACTTTAAGGGCAATAAGGCCTCAACAAGTATACTGCATGGGATTTTTTGAGAATAAGAATGGGCTTTATAGAATATCTAGAGAAGTAGAATTAAGTGTTCTAACAAAGCCAGTAGAATTAAAAATAGTAGCTAAAGAATTTGAAAATAGTTTAAAATATTCAGGATATAAGTATATTCACCAAGGTATGTACATAATAGGAATCAAAGGAATGACAAGAAAGAAATTAGGAGCTAAAGTGCTAATAACCTTATTAGATAAAAGATGGGACACAATAAACAAAGCATCTTTAGGCTATCTAGAAGGAGATATGAATGAAAATATGTTGATAACCTATATAGCGCCTGATTTAATGATGCCTGTAAATGAATTCATAGATAAAATGAGTTTTGGTTTCCAAACAAAAGGATACGAAGAGTTTAAGGGAACAAATTTATTAATAAGTATAGAATTTATAGGAAGATTGACTAATAGAAGTGCCTCCAAATACAAAATCAATGTAAATGATGTGATAGAAAAAATGCATTCTAAAGGAATAAAATTCATGAGCCCTTTAATAATAGACTCTGAAGAAAGAGCAGGAGAAAAATGGCCAATTAGTGAATTTATAAAAAATAAAACCTTGAGTCAGCCTGAAAACTTCATAAGTTACCAAGACAGCAAAGGGAATGTTAGTATTAGATTTACAAATTATAAAACCAGAGCTTCGGATGATTTGGATGCAGAATCATCTGACAGAGATATTATAGATAACAGAAGACATAGTATATCTGAATTGATGGAAAAATTAGACCATGAAAGTGAAATAAAATATTATGAAGATAAATTAAGAGATATAGCAGATGAATATAATAACTCTATGAAAAGTGAGTGGCCTAAAATTAGAGACAAGGAACTTTATTTCTATAGAGAACTATCCAGGATTAAGAAACAAAAAAAAGAGAAAAGCTTGGCCATAGAAACCCCCAGAACCCAGGAAATTAAAATAGAACAAATAAA---------GTCAGAAGAACCAAGAGAAGAAATCCAAAAGTTAGATAAGGTATTAAGTGAGGAAGAGCAATGGGAAGTAAATGAGAAATTATTACTAGAGAGTTATGAAGAAGAAAACAACCTGATAGAGGAAATAGAGAATATAGAA---GAAGAAGATAATGCAGAACAATATAATGATTTTATAGACTCATTGGATGAGGAAGGTTTGCATAATCTAGATAATGCAATGGAAGCTATGGAAGTAGATTTGGGAACAGGAAAAAGGAAAAGATACGGAGAGGGTTCTG
>Chr10:23215006-23216391:-1
CAAGCAGAGATGATAA---------CTGTTCTGATAAACAAAAAGGCAAATATGATGACATAGATGAGCTGAAAGATGTTGCACAAGTAGATAAGCAGCTCGAAAGATATCAACGAGATACTTTAAGGGCAATAAGGCCTCAACAAGTATACTGCATGGGATTTTTTGAGAATAAGAATGGGCTTTATAGAATATCTAGAGAAGTAGAATTAAGTGTTCTAACAAAGCCAGTAGAATTAAAAATAGTAGCTAAAGAATTTGAAAATAGTTTAAAATATTCAGGATATAAGTATATTCACCAAGGTATGTACATAATAGGAATCAAAGGAATGACAAGAAAGAAATTAGGAGCTAAAGTGCTAATAACCTTATTAGATAAAAGATGGGACACAATAAACAAAGCATCTTTAGGCTATCTAGAAGGAGATATGAATGAAAATATGTTGATAACCTATATAGCGCCTGATTTAATGATGCCTGTAAATGAATTCATAGATAAAATGAGTTTTGGTTTCCAAACAAAAGGATACGAAGAGTTTAAGGGAACAAATTTATTAATAAGTATAGAATTTATAGGAAGATTGACTAATAGAAGTGCCTCCAAATACAAAATCAATGTAAATGATGTGATAGAAAAAATGCATTCTAAAGGAATAAAATTCATGAGCCCTTTAATAATAGACTCTGAAGAAAGAGCAGGAGAAAAATGGCCAATTAGTGAATTTATAAAAAATAAAACCTTGAGTCAGCCTGAAAACTTCATAAGTTACCAAGACAGCAAAGGGAATGTTAGTATTAGATTTACAAATTATAAAACCAGAGCTTCGGATGATTTGGATGCAGAATCATCTGACAGAGATATTATAGATAACAGAAGACATAGTATATCTGAATTGATGGAAAAATTAGACCATGAAAGTGAAATAAAATATTATGAAGATAAATTAAGAGATATAGCAGATGAATATAATAACTCTATGAAAAGTGAGTGGCCTAAAATTAGAGACAAGGAACTTTATTTCTATAGAGAACTATCCAGGATTAAGAAACAAAAAAAAGAGAAAAGCTTGGTCATAGAAATCCCCAGAACCCAGGAAATTAAAATAGAACAAATAAA---------GTCAGAAGAACCAAGAGAAGAAATCCAAAAGTTAGATAAGGTATTAAGTGAGGAAGAGCAATGGGAAGTAAATGAGAAATTATTACTAGAGAGTTATGAAGAAGAAAACAACCTGATAGAGGAAATAGAGAATATAGAA---GAAGAAGATAATGCAGAACAATATAATGATTTTATAGACTCATTGGATGAGGAAGGTTTGCATAATCTAGATAATGCAATGGAAGCTATGGAAGTAGATTTGGGAACAGGAAAAAGGAAAAGATACGGAGAGGGTTCTG
>Chr11:9668592-9669977:-1
CAAGCAGAGATGATAA---------CTGTTCTGATAAACAAAAAGGCAAATATGATGACATAGATGAGCTGAAAGATGTTGCACAAGTAGATAAGCAGCTCGAAAGATATCAACGAGATACTTTAAGGGCAATAAGGCCTCAACAAGTATACTGCATGGGATTTTTTGAGAATAAGAATGGGCTTTATAGAATATCTAGAGAAGTAGAATTAAGTGTTCTAACAAAGCCAGTAGAATTAAAAATAGTAGCTAAAGAATTTGAAAATAGTTTAAAATATTCAGGATATAAGTATATTCACCAAGGTATGTACATAATAGGAATCAAAGGAATGACAAGAAAGAAATTAGGAGCTAAAGTGCTAATAACCTTATTAGATAAAAGATGGGACACAATAAACAAAGCATCTTTAGGCTATCTAGAAGGAGATATGAATGGAAATATGTTGATAACCTATATAGCGCCTGATTTAATGATGCCTGTAAATGAATTCATAGATAAAATGAGTTTTGGTTTCCAAACAAAAGGATACGAAGAGTTTAAGGGAACAAATTTATTAATAAGTATAGAATTTATAGGAAGATTGACTAATAGAAGTGCCTCCAAATACAAAATCAATGTAAATGATGTGATAGAAAAAATGCATTCTAAAGGAATAAAATTCATGAGCCCTTTAATAATAGACTCTGAAGAAAGAGCAGGAGAAAAATGGCCAATTAGTGAATTTATAAAAAATAAAACCTTGAGTCAGCCTGAAAACTTCATAAGTTACCAAGACAGCAAAGGGAATGTTAGTATTAGATTTACAAATTATAAAACCAGAGCTTCGGATGATTTGGATGCAGAATCATCTGACAGAGATATTATAGATAACAGAAGACATAGTATATCTGAATTGATGGAAAAATTAGACCATGAAAGTGAAATAAAATATTATGAAGATAAATTAAGAGATATAGCAGATGAATATAATAACTCTATGAAAAGTGAGTGGCCTAAAATTAGAGACAAGAAACTTTATTTCTATAGAGAACTATCCAGGATTAAGAAACAAAAAAAAGAGAAAAGCTTGGCCATAGAAACCCCCAGAACCCAGGAAATTAAAATAGAACAAATAAA---------GTCAGAAGAACCAAGAGAAGAAATCCAAAAGTTAGATAAGGTATTAAGTGAGGAAGAGCAATGGGAAGTAAATGAGAAATTATTACTAGAGAGTTATGAAGAAGAAAATAACCTGATAGAGGAAATAGAGAATATAGAA---GAAGAAGATAATGCAGAACAATATAATGATTTTATAGACTCATTGGATGAGGAAGGTTTGCATAATCTAGATAATGCAATGGAAGCTATGGAAGTAGATTTGGGAACAGGAAAAAGGAAAAGATACGGAGAGGGTTCTG
>Chr11:28351143-28352530:1
CAAGCAGAGATGATAA---------CTGTTCTGATAAACAAAAAGGCAAATATGATGACATAGATGAGCTGGAAGATGTTGCACAAGTAGATAAGCAGCTCGAAAGATATCAACGAGATACTTTAAGGGCAATAAGACCTCAACAAGTATACTGCATGGGATTTTTTGAGAATAAGAATGGGCTATATAGAATATCTTGAGAAGTAGAATTAAGTGTTCTAACAAAACCAGTAGAATTAAAAATAGTAGCTAAAGAATTTGAAAATGGATTAAAATATTCAGGATATAAGTATATTCACTAAGGTATGTACATAATAGGAATCAAAGGAATGACAAGAAAGAAATTAGGAGCTAAAGTTTTAATAACCTTATTAGATAAAAGATGGGACACAACAGACAAAGCATCTTTAGGCTATCTAGAAGGAGATATGAATGAAAATATGTTGATAACCTATATAGCGCCTGATTTAGTGATGCCTGTAAAAGAATTCATAGATAAAATGAGTTTTGGTTTTCAAACAAAAGGATACGAAGAGTTTAAAGGAACAAATTTATTAATAAGTATAGAATTTATAGGAAGATTGACTAATAGAAGTGCCTCCAAATACAAAATCAATGTAAATGATGTGATAGAAAAAATGCATTCTAAAGGAATAAAATTCATGAGCCCTTTAACAATAGACTCTGAAGAAAGAGCAGGAGAAAAATGGCCAATTAGTGAATTTATAAAAAATAAAACCTTGAGTCAGCCTGAAAACTTCATAAGTTACCAAGATAGCAAAGGGAATGTTAGTATTAGATTTACAAATTATAAAACCAGAGCTTCGGATGATTTGGATACAGAATCATCTGACAGAAATATTATAGATAACAGAAGACATAGTATTTCTGAATTGATGGAAAAATTAGATCATGAAAGTGAAATAAAATATTATGAAGATAAATTAAGAGATATAGCAGATGAATATAATAACTCTATGAAAAGTGAGTGGCCTAAAATTAGAGACAAGGAACTTTACTTCTATAGAGAACTATCCAGGATTAAGAAACAAAAAAAAGAGAAAAGCTTGGCCATAGAAACCCCCAGAACCAAGGAAATTAAAATAGAACAAATAAA---------GTTGGAAGAACCAAGAGAAGAAAACCAAAAGTTTGATAAGGTATTAAGTGAGGAAGAGCAATGGGAAGTAAATGAGAGATTATTACTAGAGAGTTATGAAGAAGAAAACAACCTGATAGAGAAAATAGAGAATATAGAA---GAAGAAGATAATGCAGAACAATATAATGATTTTATAGACTCATTGGATGAGGTAGGTTTGCATAATCTAGATAATGCAATGGAAGCCATGGAAGTAGATTTGGGAACAGGAAAAAGGAAAAGATACGGAGAGGGTTCTG
>Chr12:23145385-23146791:-1
CAAGCAGAGACGATAAATCTTTAAGTTGTATTGATAAACAAAAAGGTAAAAATGAAGACATAGATGAGCTTGAAGATATTGCAGAAGTAGACAAACAGCTCGAAAGATATCAAAAAGATACTCTGAGGGCAATAAGACCTCAACAAATATATTGCATGGGATTTTTTGAGAATAAAAATGGGTTATACAGAATATCTAGAGAAGTAGAGTTAAGCGTTTTAACAAAGCCAGTTGAGTTAAAAATTATAGCCAAGGAATTTGAAAATGGATTAAAGTATTCAGGGTATAAATATATTCACCAAGGTATGTATATAATAGGAATCAAAGGTATGACAAGAAAGAAATTAGGAGCTAAAGTTTTAATAACTCTGTTAGATAAAAGGTGGGACACAATAGATAAAGCAGCATTAGGATTTTTAGAAGGTGACATGAATGAGAATATGTTGATAACATATATAGCCCCAGATCTAATGATGCCTATAAAAGAATTTATAGATAAAATGAGTTTTGGTTTTCAAACAAAGGGATACGAGGAATTTAAAGGAACAAATTTGCTAGTAAGCATAGAATTTATAGGAAGATTAACTAATAGAAGTGCCTCCAAATACAAAATAAATGTAAATGACGTGATTGAAAATATGCACTCTAAGGGAATAACTTTCATGAGCCCTTTAAAAATAAGTTCTGAAGAAAGGGCAGGAGAAGAATGGAAAATTAGTGATTTAATTGAAAGTAAAACTTTGAGTCAGCCTGAAAATTATATAAGTTATCAAAATAGTAAAGGAAATACCAGCATTAGATTTATAAATTACAAACCCAAAACCACAGATGACTTAGAAACAGAAGCATCTGATAGAAATATAATAGATAATAGAAGACATAGTGTTTCAGAGTTTATGGAAAAATTAGATCAAGAAAGTGAGATAAAATATTACGAAAATAAATTAAAGGAAATAAATGAAGAATATAATAACTCTATGAAGTGTGAGTGGCCTAAAATAAGAGATAAAGAACTTTATTTCTATAGAGAATTAGCTAGAGTAAAGAAAGTAAAGAAGAACGAAGATATGGCAGTAGAAATTTTTAAAAACCAACAAACCAAGATAGAACAGATAAAGAGGAAAGAGCAAGATAAGCATGGCAAAGAAGAGCAAAATCTTGGTAAAATTTTAAGTGAAGAAGAGCAATGGGCAGAGAATGAAAGATTATTTCTTGAAAGTTATGAAGAAGAAATTAATCTAATAAATGAGATGGAGAACATAAAAAATGAAATAGACAATGCAGAACAATATAATGATTTTATAAACACATTAGATGAAGTAGGGTTACATAATCTTGATAATGCAATGGAAGCTATGGAAGTGGACTTAGGAACAGGAAAGAGAAAAAGATATGGAGAAGGTACTG
>Chr12:25994530-25995916:1
CAAGCAGAGATGATAA---------CTGTTCTGATAAACAAAAAGGCAAATATGATGACATAGATGAGCTGAAAGATGTTGCACAAGTAGATAAGCAGCTCGAAAGATATCAACGAGATACTTTAAGGGCAATAAGGCCTCAACAAGTATACTGCATGGGATTTTTTGAGAATAAGAATGGGCTTTATAGAATATCTAGAGAAGTAGAATTAAGTGTTCTAACAAAGCCAGTAGAATTAAAAATAGTAGCTAAAGAATTTGAAAATAGTTTAAAATATTCAGGATATAAGTATATTCACCAAGGTATGTACATAATAGGAATCAAAGGAATGACAAGAAAGAAATTAGGAGCTAAAGTGCTAATAACCTTATTAGATAAAAGATGGGACACAATAAACAAAGCATCTTTAGGCTATCTAGAAGGAGATATGAATGAAAATATGTTGATAACCTATATAGCGCCTGATTTAATGATGCCTGTAAATGAATTCATAGATAAAATGAGTTTTGGTTTCCAAACAAAAGGATACGAAGAGTTTAAGGGAACAAATTTATTAATAAGTATAGAATTTATAGGAAGATTGACTAATAGAAGTGCCTCCAAATACAAAATCAATGTAAATGATGTGATAGAAAAAATGCATTCTAAAGGAATAAAATTCATGAGCCCTTTAATAATAGACTCTGAAGAAAGAGCAGGAGAAAAATGGCCAATTAGTGAATTTATAAAAAATAAAACCTTGAGTCAGCCTGAAAACTTCATAAGTTACCAAGACAGCAAAGGGAATGTTAGTATTAGATTTACAAATTATAAAACCAGAGCTTCGGATGATTTGGATGCAGAATCATCTGACAGAGATATTATAGATAACAGAAGACATAGTATATCTGAATTGATGGAAAAATTAGACCATGAAAGTGAAATAAAATATTATGAAGATAAATTAAGAGATATAGCAGATGAATATAATAACTCTATGAAAAGTGAGTGGCCTAAAATTAGAGACAAGGAACTTTATTTCTATAGAGAACTATCCAGGATTAAGAAACAAAAAAAAGAGAAAAGCTTGGCCATAGAAACCCCCAGAACCCAGGAAATTAAAATAGAACAAATAAA---------GTCAGAAGAACCAAGAGAAGAAATCCAAAAGTTAGATAAGGTATTAAGTGAGGAAGAGCAATGGGAAGTAAATGAGAAATTATTACTAGAGAGTTATGAAGAAGAAAACAACCTGATAGAGGAAATAGAGAATATAGAA---GAAGAAGATAATGCAGAACAATATAATGATTTTATAGACTCATTGGATGAGGAAGGTTTGCATAATCTAGATAATGCAATGGAAGCTATGGAAGAAGATTTGGGAACAGGAAAAAGGAAAAGATACGGAGAGGGTTCTG
>Chr01:759610-761016:-1
CAAGCAGAGACGATAAATCTTTAAGTTGTATTGATAAACAAAAAGGTAAAAAAGAAGACATAGATGAGCTTGAAGATATTGCAGAAGTAGACAAACAGCTCGAAAGATATCAAAGAGATACTCTGAAGGCAATAAGACCTCAACAAATATATTGCATGGGATTTTTTGAGAATAAAAATGGGTTATACAGAATATCTAGAGAAGTAGAGTTAAGCGTTTTAACAAAGCCAGTTGAGTTAAAAATTGTAGCCAAGGAATTTGAAAATGGATTAAAGTATTCAGGGTATAAATATATTCACCAAGGTATGTATATAATAGGAATCAAAGGTATGACAAGAAAGAAAATAGGAGCTAAAGTTTTAATAACTCTGTTAGATAAAAGGTGGGACACAATAGATAAAGCAGCATTAGGATTTTTAGAAGGTGACATGAATGAGAATATGTTGATAACATATATAGCCCCAGATCTAATGATGCCTATAAAAGAATTTATAGATAAAATGAGTTTTGGTTTTCAAACAAAGGGATACGAGGAATTTAAAGGAACAAATTTGCTAGTAAGCATAGAATTTATAGGAAGATTAACTAATAGAAGTGCCTCCAAATACAAAATAAATGTAAATGACGTGATTGAAAATATGCACTCTAAGGGAATAACTTTCATGAGCCCTTTAAAAATAAGTTCTGAAGAAAGGGCAGGAGAAGAATGGAAAATTAGTGATTTAATTGAAAGCAAAACTTTGAGTCAGCCTGAAAATTATATAAGTTATCAAAATAGTAAAGGAAATACCAGCATTAGATTTATAAATTACAAACCCAGAACCACAGATGACTTAGAAACAGAAGCATCTGATAGAAATATAATAGATAATAGAAGACATAGTGTTTCAGAGTTTATGGAAAAATTAGATCAAGAAAGTGAGATAAAATATTACGAAAATAAATTAAAGGAAATAAATGAAGAATATAATAACTCTATGAAGTGTGAGTGGCCTAAAATAAGAGATAAAGAACTTTATTTCTATAGAGAATTAGCCAGAGTAAAGAAAGTAAAGAAGAACGAAGATATGGCAGTAGAAATTTTTAAAAACCAAGAAACCAAGATAGAACAGATAAAGAAGAAAGAGCAAGATGAGCATGACAAAGAAGAGCAAAATCTTGGTAAAATTTTAAGTGAAGAAGAGCAATGGGCAGAGAATGAAAAATTATTTCTTGAAAGTTATGAAGAAGAAATTAATCTAATAAATGAGATGGAGAATATAGAAAATGAAATAGACAATGCAGAACAATATAATGATTTTATAAACACATTAGATGAAGTAGGGTTACATAATCTTGAAAATGCAATGGAAGCTATGGAAGTGGACTTAGGAACAGGAAAGAGAAAAAGATATGGAGAAGGTACTG
>Chr04:9827880-9829286:-1
CAAGCAGAGACGATAAATCTTTAAGTTGTATTGATAAACAAAAAGGTAAAAAAGAAGACATAGATGAGCTTGAAGATATTGCAGAAGTAGACAAACAGCTCGAAAGATATCAAAGAGATACTCTGAGGGCAATAAGACCTCAACAAATATATTGCATGGGATTTTTTAAGAATAAAAATGGGTTATACAGAATATCTAGAGAAGTAGAGTTAAGCGTTTTAACAAAGCCAGTTGAGTTAAAAATTGTAGCCAAGGAATTTGAAAATGGATTAAAGTATTCAGGGTATAAATATATTCACCAAGGTATGTATATAATAGGAATCAAAGGTATGACAAGAAAGAAATTAGAAGCTAAAGTTTTAATAACTCTGTTAGATAAAAGGTGGGACACAATAGATAAAGCAGCATTAGGATTTTTAGAAGGTGATATGAATGAGAATATGTTGATAACATATATAGCCCCAGATCTAATGATGCCTATAAAAGAATTTATAGATAAAATGAGTTTTGGTTTTCAAACAAAGGGATACGAAGAATTTAAAGGAACAAATTTGCTAGTAAGCATAGAATTTATAGGAAGATTAACTAATAGAAGTGCCTCCAAATACAAAATAAATGTAAATGACGTGATTGAAAATATGCACTCTAAGGGAATAACTTTTATGAGCCCTTTAAAAATAAGTTCTGAAGAAAGGGCAGGAGAAGAATGGAAAATTAGTGATTTAATTGAAAGCAAAACTTTGAGTCAGCCTGAAAATTATATAAGTTATCAAAATAGTAAAGGAAATACCAGCATTAGATTTATAAATTACAAACCCAGAACCACAGATGACTTAGAAACAGAAGCATCTGATAGAAATATAAGAGATAATAGAAGACATAGTGTTTCAGAGTTTATGGAAAAATTAGATCAAGAAAGTGAGATAAAATATTACGAAAATAAATTAAAGGAAATAAATGAAGAATATAATAACTCTATGAAGTGTGAGTGGCCTAAAATAAGAAATAAAGAACTTTATTTCTATAGAGAATTAGCTAGAGTAAAGAAAGTAAAGAAGAACGAAGATATGGCAGTAGAAATTTTTAAAAACCAAGAAACCAAGATAGAACAGATAAAGAGGAAAGAGCAAGATAAGCATGGCAAAGAAGAGCAAAATCTTGGTAAAATTTTAAGTGAAGAAGAGCAATGGGCAGAGAATGAAAGATTATTTCTTGAAAGTTATGAAGAAGAAATTAATCTAATAAATGAGATGGAGAACATAGAAAATGAAATAGACAATGCAGAACAATATAATGATTTTATAAACACATTAGATGAAGTAGGGTTACATAATCTTGATAATGCAATGGAAGCTATGGAAGTGGACTTAGGAACAGGAAAGAGAAAAAGATATGGAGAAGGTACTG
>Chr04:18575611-18576984:1
CAAGCAGAGATGATAA---------CTGTTCTGATAAACAAAAAGGCAAATATGATGACATAGATGAGCTGAAAGATGTTGCACAAGTAGATAAGCAGCTCGAAAGATATCAACGAGATACTTTAAGGGCAATAAGACCTCAACAAGTATACTGCATGGGATTTTTTGAGAATAAGAATGGGCTATATAGAATATCTAGAGAAGTAGAATTAAGTGTTCTAACAAAACCAGTAGAATTAAAAATAGTAGCTAAAGAATTTGAAAATGGATTAAAATATTCATGATATAAGTATATTCACCAAGGTATGTACATAATAGGAATCAAAGGAATGACAAGAAAGAAATTAGGAGCTAAAGTTTTAATAACCTTATTAGATAAAAGATGGGACACAATAGACAGAACATCTTTAGGCTATCTAGAAGGAGATATGAATGAAAATATGTTGATAACCTATATAGCACCTGATTTAATGATGCCTGTAAAAGAATTCATAGATAAAATGAGTTTTGGTTTTCAAACAAAAGGATACGAAGAGTTTAAGGGAACAAATTTATTAATAAGTATAGAATTTATAGGAAGATTGACTAATAGAAGTGCCTCCAAATACAAAATCAATGTAAATGATGTGATAGAAAAAATGCATTCTAAAGGAATAAAATTCATGAGCCCTTTAACAATAGACTCTGAAGAAAGAGCAGGAGAAAAATGGCCAATTAGTAAATTTATAAAAAATAAAACCTTGAGTCAGCCTGAAAACTTCATAAGTTACCAAGATAGCAAAGGGAATGTTAGTATTAGATTTACAAATTATGAAACCAGAGCTTCGGATGATTTGGATACAGAATCATCTGACAGAAATATTATAGATAACAGAAGACATAGTATTTCTGAATTGATGGAAAAATTAGATTATGAAAGTGAAATAAAATATTATGAAGATAAATTAAGAGATATAGCAGATGAATATAATAACTCTATGAAAAGTGAGTGGCCTAAAATTAGAGACAAGGAACTTTACTTCTATAGAGAACTATCCAGGATTAAGAAACAAAAAAAAGAGAAAAGCTTGGCCATAGAAACCCCTAGAACCCAGGAAATTAAAATAGAACAAATAAA---------GTTGGAAGAA------------AACCAAAAGTTCGATAAGGTATTAAGTGAGGAAGAGCAATGGGAAGTAAATGAGAGATTATTACTAGAGAGTTATGAAGAAGAAAACAACCTGATAGAGGAAATAGAGAATATAGAA---GAAGAAGATAATGCAGAACAATATAATGATTTTATAGACTCATTGGATGAGGTAGGTTTGCATAATCTAGATAATGCAATGGAAGCCATGGAAGTAGATTTGGGAACAGGAAAAAGGAAAAGATACGGAGATGGTTTTG
>Chr04:20895815-20897210:1
CAAGCAGAGACGATAAATCTTTAAGTTGTATTGATAAACAAAAAGGTAAAAATGAAGACATAGATGAGCTTGAAGATATTGCAGAAGTAGACAAACAGCTCGAAAGATATCAAAGAGATACTCTGAGGGCAATAAGACCTCAACAAATATATTGCATGGGATTTTTTGAGAATAAAAATGGGTTATACAGAATATCTAAAGAAGTACAGTTAAGTGTTTTAACAAAGCCAATTGAGTTAAAAATTGTAGCCAAGGAATTTGAAAATGGATTAAAGTATTCAGGGTATAAATATATTCACCAATGTATGTATATAATAGGAATCAAAGGTATGACAAGAAAGAAATTAGGAGCTAAAGTTTTAATAA----------TAAAAGGTGGGACACAATAGATAAAGCAGCATTAGGATTTTTAGAAGGTGATATGAATGAGAATATGTTGATAACATATATAGCCCCAGATCTAATGATGCCTATAAAAGAATTTATAGATAAAATAAGTTTTGGTTTTCAAACAAAGAGATACGAAGAATTTAAAGGAACAAATTTGCTAGTAAGCATAGAATTTATAGGAAGATTAACTAATAGAAGTGCCTCCAAATACAAAATAAATGTAAATGACGTGATTGAAAATATGCACTCTAAGGGAATAACTTTCATGAGCCCTTTAAAAATAAGTTCTGAAGAAAGGGCAGGAGAAGAATGGAAAATTAGTGATTTAATTGAAAGCAAAACTTTGAGTCAGCCTGAAAATTATATAAGTTATCAAAATAGTAAAGGAAATACCAGCATTAGATTTATAAATTACAAACCCAGAACCACAGATGACTTAGAAACAGAAGCATATGATAGAAATATAATAGATAATAGAAGACATAGTGTTTCAGAGTTTATGGAAAAATTAGATCAAGAAAGTGAGATAAAATATTACGAAAATAAATTAAAGGAAATAAATGAAGAATATAATAACACT-CAAAGAGTGAGTGGCCTAAAATAAGAGATAAAGAACTTTATTTCTATAGAGAATTAGCTAGAGTAAAGAAAGTAAAGAAGAACGAAGATATGGCAGTAGAAATTTTTAAAAACCAAGAAACCAAGATAGAACAGATAAAGAGGAAAGAGCAAGATAAGCATGGCAAAGAAGAGCAAAATCTTGGTAAAATTTTAAGTGAAGAAGAGCAATGGGCAGAGAATGAAAGATTATTTCTGGAAAGTTATGAAGAAGAAATTAATCTAATAAATGAGATGGAGAATATAGAAAACGAAATAGACAATGCAGAACAATATAATGATTTTATAAACACATTAGATGAAGTAGGGTTACATAATCTTGATAATGCAATGGAAGCTATGGAAGTGGACTTAGGAACAGGAAAGAGAAAAAGATATGGAGAAGGTACTG
>Chr05:18273234-18274640:1
CAAGCAGAGACGATAAATCTTTAAGTTGTATTGATAAACAAAAAGGTAAAAATGAAGACATAGATGAGCTTGTAGATATTGCAGAAGTAGACAAACAGCTCGAAAGATATCAAAGAGATACTCTGAGGGCAATAAGACCTCAACAAATATATTGCATGGGATTTTTTGAGAATAAAAATGGGTTATACAGAATATCTACAGAAGTAGAGTTAAGCGTTTTAACAAAGCCAGTTGAGTTAAAAATTGTAGCCAAGGAATTTGAAAATGGATTAAAGTATTCAGGGTATAAATATATTCACCAAGGTATGTATATAATAGGAATCACAGGTATGACAAGAAAGAAATTAGGAGCTAAAGTTTTAATAACTCTGTTAGATAAAAGGTGGGACACAATAGATAAAGCAGCATTAGGATTTTTAGAAAGTGATATGAATGAGAATATGTTGATAACATATATAGCCCCAGATCTAATGATGCCTATAAAAGAATTTATAGATAAAATGAGTTTTGGTTTTCAAACAAAGGGATACGAAGAATTTAAAGGAACAAATTTGCTAGTAAGCATAGAATTTATAGGAAGATTAACTAATAGAAGTGCCTCCAAATACAAAATAAATGTAAATGACGTGATTGAAAATATGCACTCTAAGGGAATAACTTTCATGAGCCCTTTAAAAATAAGTTCTGAAGAAAGGGCAGGAGAAGAATGGAAAATTAGTGATTTAATCGAAAGCAAAACTTTGAGTCAGCCTGAAAATTATATAAGTTATCAAAACAGTAAAGGGAATACCAGCATTAGATTTATAAATTACAAACCCAGAACCACAGATGACTTAGAAACAGAAGCATCTGATAGAAATATAATAGATAATAGAAGACATAGTGTTTCAGAGTTTATGGAAAAATTAGATCAAGAAAGTGAGATAAAATATTACGAAAATAAATTAAAGGAAATAAATGAAGAATATAATAAATCTATGAAGTGTGAGTGGCCTAAAATAAGAGATAAAGAACTTTATTTCTATAGAGAATTAGCTAGAGTAAAGAAAGTAAAGAAGAAAGAAGATATGGCAGTAGAAATTTTTAAAAACCACGAAACCATGATAGAACAGATAAAGAGGATAGAGCAAGATAAGCATGGCAAAGAAGAGCAAAATCTTGGTAAAATTTTAAGTGAAGAAGAGCAATGGGCAGAGAATGAAAGATTATTTCTTGAAAGTTATGAAGAAGAAATTAATCTAATAAATGAGATGGAGAATATAGAAAATGAAATAGACAATGCAGAACAATATAATGATTTTATAAACACATTAGATGAAGTAGGGTTACATAATCTTAATAATGCAATGGAAGCTATGGAAGTGGACTTAGGAACAGGAAAGAGAAAAAGATATGGAGAAGGTACTG
>Chr05:18281287-18282692:-1
CAAGCAGAGACGATAAATCTTTAAGTTGTATTGATAAACAAAAAGGTAAAATTGAAGACATAGATGAGCTTGAAGATATT-CAGAAGTAGACAAACAACTCGAAAGATATCAAAGAGATACTCTGAGGGCAATAAGACCTCAACAAATATATTGCATGGGATTTTTTGAGAATAAAAATGGGTTATACAGAATATCTAGAGAAGTAGAGTTAAGTGTTTTAACAAAGCCAGTTGAGTTAAAAATTGTAGCCAAGGAATTTGAAAATGGATTAAAGTATTCAGGGTATAAATATATTCACCAAGGTATGTATATAATAGGAATCAAAGGTATGACAAGAAAGAAATTAGGAGCTAAAGTTTTAATAACTCTATTAGATAAAAGGTGGGACACAATAGATAAAGCAGCATTAGGATTTTTAGAAGGTGATATGAATGAGAATATGTTGATAACATATATAGCCCCAGATCTAATGATGCCTATAAAAGAATTTATAGATAAAATGAGTTTTGGTTTTCAAACAAAGGGATACGAAGAATTTAAAGGAACAAATTTGCTAGTAAGCATAGAATTTATACGAAGATTAACTAATAGAAGTGCCTCCAAATACAAAATAAATGTAAATGACGTGATTGAAAATATGCACTCTAAGGGAATAACTTTCATGAGCCCTTTAAAAATAAGTTCTGAAGAAAGGGCAGGAGAAGAATGGAAAATTAGTGATTTAATTGAAAGCAAAACTTTGAATCAGCCTGAAAATTATATAAGTTATCAAAACAGTAAAGGAAATACCAGCATTAGATTTATAAATTACAAACCCAGAACCACAGATGACTTAGAAACAGAAGCATCTGATAGAAATATAATAGATAAAAGAAGACATAGTATTTCAGAGTTTATGGAAAAGTTAGATCAAGAAAGTGAGATAAAATATTACGAAAATAAATTAAAGGAAATAAATGAAGAATATAATAACTCTATGAAGTGTGAGTGGCCTAAAATAAGAGATAAAGAACTTTATTTCTATAGAGAATTAGCTAGAGTAAAGAAAGTAAAGAAGAACGAAGATATGGCAGTAGAAATTTTTAAAAACCAAGAAACCAAGATAGAACAGATAAAGAGGATAGAGCAAGATAAGCATGGCAAAGAAGAGCAAAATCTTGGTAAAATTTTAAGTGAAGAAGAGCAATGGGCAGAGAATGAAAGATTATTTCTTGAAAGTTATGAAGAAGAAATTAATCTAATAAATGAGATGGAGAATATAGAAAATGAAATAGACAATGCAGAACAATATAATGATTTTATAAACACATTAGATGAAGTAGGGTTACATAATCTTGATAATGCAATGGAAGCTATGGAAGTGGACTTAGGAACATGAAAGAGAAAAAGATATGGAGAAGGTACTG
>Chr05:19061849-19063254:-1
CAAGCAGAGACGATAAATTTTTAAGTTGTATTGATAAACAAAAAGGTAAAAATGAAGACATAGATTAGCTTGAAGATATTGCAGAAGTAGACAAACAGCTCGAAAGATATCAAAGAGATACTCTGAGGGCAATAAGACCTCAACAAATATATTGCATGGGATTTTTTGAGAATAAAAATGGGTTATACAGAATATCTAGAGAAGTAGAGTTAAGCGTTTTAACAAAGCCAGTTGAGTTAAAAATTGTAGCCAAGGAATTTGAAAATGGATTAAAGTATTCAGGGTATAAATATATTCACCAAGGTATGTATATAATAGGAATCAAAGGTATGACAAGAAAGAAATTAGGAGCTAAAGTTTTAATAACTCTGTTAGATAAAAGGTGGGACACAATAGATAAAGCAGCATTAGGATTTTTAGAAGGTGATATGAATGAGAATATGTTGATAACATATATAGCCCCAGATCTAATGATGCCTATAAAAGAATTTATAGATAAAATGAGTTTTGGTTTTCAAACAAAGGGATACGAAGAATTTAAAGGAACAAATTTGCTAGTAAGCATAGAATTTATAGGAAGATTAACTAATAGAAGTGCCTCCAAATACAAAATAAATGTAAATGACGTGATTGAAAATATGCACTCTAAGGGAATAACTTTCATGAGCCCTTTAAAAATAAGTTCTGAAGAAAGGGCAGAAGAAGAATGGAAAATTAGTGATTTAATTGAAAGCAAAACTTTGAGTCAGCCTGAAAATTATATAAGTTATCAAAACAGTAAAGGAAATACCAACATTAGATTTATAAATTACAAACCCAGAACCACAGATGACTTAGAAACAGAAGCATCTGATAGAAATATAATAGATAATAGAAGACATAGTGTTTCAGAGTTTATGGAAAAATTAGATCAAGAAAGTGAGATAAAATATTACGAAAATAAATTAAAGGAAATAAATGAAGAATATAATAAATCTATGAAGTGTGAGTGGCCTAAAATAAGAGATAAAGAACTTTATTTCTATAGAGAATTAGCTAGAGTAAAGAAAGTAAAGA-GAACAAAGATATGGCAGTAGAAATTTTTAAAAACCAAGAAACCAAGATAGAACAGATAAAGAGGAAAGAGCAAGATAAGCATGGCAAAGAAGAGCAAAATCTTGGTAAAATTTTAAGTGAAGAAGAGCAATGGGCAGAGAATGAAAGATTATTTCTTGAAAGTTATGAAGAAGAAATTAATCTAATAAATGAGATGGAGAATATAGAAAATGAAATAGACAATGCAGAACAATATAATGATTTTATAAACACATTAGATGAAGTAGGGTTACATAATCTTGATAATGCAATGGAAGCTATGGAAGTGGACTTAGGAATAGGAAAGAGAAAAAAATATGGAGAAGGTACTG
>Chr06:1711089-1712495:-1
CAAGCAGAGACGATAAATCTTTAAGTTGTATTGATAAACAAAAAGGTAAAAATAAAGACATAGATGAGCTTGAAGATATTGCAGAAGTAGACAAACAGCTCGAAAGATATCAAAGAGATACTCTGAGGGCAATAAGACCTCAACAAATATATTGCATGGGATTTTTTGAGAATAAAAATGGGTTATACAGAATATCTAGAGAAGTAGAGTTAAGCGTTTTAACAAAGCCGGTTGAGTTAAAAATTGTAGCCAAGGAATTTGAAAATGGATTAAAGTATTCAGGGTATAAATATATTCACCAAGGTATGTATACAATAGGAATCAAAGGTATGACAAGAAAGAAATTAGGAGCTAAAGTTTTAATAACTCTGTTAGATAAAAGGTGGGACACAATAGATAAAGCAGCATTAGGATTTTTAGAAGGTGATATGAATGAGAATATGTTGATAACATATATAGCCCCAGATCTAATGATGCCTATAAAAGAATTTATAGATAAAATGAGTTTTGGTTTTCAAACAAAGGGATACGAAGAATTTAAAGGAACAAATTTGCTAGTAAGCATAGAATTTATAGGAAGATTAACTAATAGAAGTGCCTCCAAATACAAAATAAATGTAAATGACGTGATTGAAAATATGCACTCTAAGGGAATAACTTTCATGAGCCCTTTAAAAATAAGTTCTGAAGAAAGGGCAGGAGAAGAATGGAAAATTAGTGATTTAATTGAAAGCAAAACTTTGAGTCAGCCTGAAAATTATATAAGTTATCAAAACAGTAAAGGAAATACCAGCATTAGATTTATAAATTATAAACCCAGAACCACAGATGACTTAGAAACAGAAGCATCTGATAGAAATATAATAGATAATAGAAGACATAGTGTTTCAGAGTTTATGAAAAAATTAGATCAAGAAAGTGAGATAAAATATTACGAAAATAAATTAAAGGAAATAAATGAAGAATATAATAAATCTATAAAGTGTGAGTGGCCTAAAATAAGAGATAAAGAACTTTATTTCTATAGAGAATTAGCTAGAGTAAAGAAAGTAAAGAAGAACGAAGATATGGCAGTAGAAATTTTTAAAAACCAAGAAACCAAGATAGAACAGATAAAGAGGAAAGAGCAAGATAAGCATGGCAAAGAAGAGCAAAATCTTGGTAAAATTTTAAGTGAAGAAGAGCAATGGGCAGAGAATGAAAGATTATTTCTTGAAAGTTATGAAGAAGAAATTAATCTAATAAATGAGATGGAGAATATAGAAAATGAAATAGACAATGCAGAACAATATAATGATTTTATAGACACATTAGATGAAGTAGGGTTACATAATCTTGATAATGCAATGGAAGCTATGGAAGTGGACTTAGGAACAGGAAAAAGAAAAATATATGGAGAAGGTACTG
>Chr06:10574326-10575711:1
CAAGCAGAGATGATAA---------CTGTTCTGATAAACAAAAAGGTAAATATGATGACATAGATGAGCTGAAAGATGTTGCACAAGTAGATAAGCAGCTCGAAAGATATCAACGAGATACTTTAAGGGCAATAAGACCTCAACAAGTATACTGCATGGGATTTTTTGAGAATAAGAATGGGCTATATAGAATATCTAGAGAAGTAGAATTAAGTGTTCTAACAAAACTAGTAGAATTAAAAATAGTAGCTAAAGAATTTGAAAATAGTTTAAAATATTCAGGATATAAGTATATTCACCAAGGTATGTACATAATAGGAATCAAAGGAATGACAAGAAAGAAATTAGGAGCTAAAGTGTTAATAACCTTATTAGATAAAAGATGGGACACAATAAACCAAGCATCTTTAGGCTATCTAGAAGGAGATATGAATGAAAATATGTTGATAACCTATATAGCGCCTGATTTAATGATGCCTGTAAATGAATTCATAGATAAAATGAGTTTTGGTTTTCAAACAAAAGGATACGAAGAGTTTAAGGGAACAAATTTATTAATAAGTATAGAATTTATAGGAAGATTGACTAATAGAAGTGCCTCCAAATACAAAATCAATGTAAATGATGTGATAGAAAAAATGCATTCTAAAGGAATAAAATTTATGAGCCCTTTAACAATAGACTCTGAAGAAAGAGCAGGAGAAAAATGGCCAATTAGTGAATTTATAAAAAATAAAACCTTGAGTCAGCCTGAAAACTTCATAAGTTACCAAGACAGCAAAGGGAATGTTAGTATTAGATTTACAAATTGTAAAACCAGAGCTTCGGATGATTTGGATGCAGAATCATCTGACAGAAATATTATAGATAACAGAAGACATAGTATATCTGAATTGATGGAAAAATTAGACCATGAAAGTGAAATAAAATATTATGAAGATAAATTAAGAGATATAGCAGATGAATATAATAACTCTATGAAAAGTGAGTGGCCTAAAATTAGAGACAAGGAACTTTATTTCTATAGAGAACTATCCAGGATCAAGAAACAAAAAAAAGAGAAAAGCTTGGCCATAGAAACCCCCAGAACCCAGGAAATTAAAATAGAACAAATAAA---------GTCAGAAGAACCAAGAGAAGAAATCCAAAAGTTTGATAAGGTATTAAGTGAGGAAGAGCAATGGGAAGTAAATGAGAAATTATTACTAGAGAGTTATGAAGAAGAAAACAACCTGATAGAGGAAATAGAGAATATAGAA---GAAGAAGATAATGCAGAACAATATAATGATTTTATAGACTCATTGGATGAGGTAGGTTTGCATAATCTAGATAATGCAATGGAAGCTATGGAAGTAGATTTGGGAACAGGAAAAAGGAAAAGATACGGAGAGGGTTCTG
>Chr06:12691265-12692649:1
CAAGCAGAGATGATAA---------CTGTTCTGATAAACAAAAAGGCAAATATGATGACATAGATGAGCTGAAAGATGTTGCACAAGTAGATAAACAGCTCGAAAGATATCAACGAGATACTTTAAGGGCAATAAGACCTCAACAAGTATACTGCATGGGATTTTTTGAGAATAAGAATGGGCTATATAGAATATCTAGAGAAGTAGAATTAAGTGTTCTAACAAAACCAGTAGAATTAAAAATAGTAGCTAAAGAATTTGAAAATAGTTTAAAATATTCAGGATATAAGTATATTCACCAAGGTATGTACATAATAGGAATCAAAGGAATGACAAGAAAGAAATTAGGAGCTAAAGTGTTAATAACCTTATTAGATAAAAGATGGGACACAATAAACAAAGCATCTTTAGGCTATCTAGAAGGAGATATGAATGAAAATATGTTGATAACCTATATAGCGCCTGATTTAATGATGCCTGTAAATGAATTCATAGATAAAATGAGTTTTGGTTT-CAAACAAAAGGATACGAAGAGTTTAAAGGAACAAATTTATTAATAAGTATAGAATTTATAGGAAGATTGACTAATAGAAGTGCCACCAAATACAAAATCAATGTAAATGATGTGATAGAAAAAATGCATTCTAAAGGAATAAAATTCATGAGCCCTTTAACAATAGACACTGAAGAAAGAGCAGGAGAAAAATGGCCAATTAGTGAATTTATAAAAAATAAAACCTTGAGTCAGCCTGAAAACTTCATAAGTTACCAAGATAGCAAAGGGAATGTTAGTATTAGATTTACAAATTATAAAACCAGAGCTTCGGATGATTTGGATGCAGAATCAACTGACAGAAATATTATAGATAATAGAAGACATAGTATTTCTGAATTGATGGAAAAATTAGACCATGAAAGTGAAATAAAATATTATGAAGATAAATTAAGAGATATAGCAGATGAATATAATAACTCTATGAAAAGTGAGTGGCCTAAAATTAGAGACAAGGAACTTTATTTCTATAGAGAACTATCCAGGATTAAGAAACAAAAAAAAGAGAAAAGCTTGGCCATAGAAACCCCCAGAACCCAGGAAATTAAAATAGAACAAATAAA---------GTCAAAAGAACCAAGAGAAGAAATCCAAAAGTTTGATAAGGTATTAAGTGAGGAAGAGCAATGGGAAGTAAATGAGAAATTATTACTAGAGAGTTATGAAGAAGAAAACAACCTGATAGAGGAAATAGAGAATATAGAA---GAAGAAGATAATGCAGAACAATATAATGATTTTATAGACTCATTGGATGAGGTAGGTTTGCATAATCTAGATAATGCAATGGAAGCCATGAAAGTAGATTTGGGAACAGGAAAAAGGAAAAGATACGGAGAGGGTTCTG
>Chr07:2815453-2816859:1
CAAGCAGAGACGATAAATCTTTAAGCTGTATTGATAAACAAAAAGGTAAAAATGAAGACATAGATGAGCTTGAAGATATTGCAGAAGTAGACAAACAGCTCGAAAGATATCAAAGAGATACTCTGAGGGCAATAAGACCTCAACAAATATATTGCATGGGATTTTTTGAGAATAAAAATGGGTTATACAGAATATCTAGAGAAGTAGAGTTAAGCGTTTTAACAAAGCCAGTTGAGTTAAAAATTGTAGCCAAGGAATTTGAAAATGGATTAAAGTATTCAGGGTATAAATATATTCACCAAGGTATGTATATAATAGGAATCAAAGGTATGACAAGAAAGAAATTAGGAGCTAAAGTTTTAATAACTCTGTTAGATAAAAGGTGGGACACAATAGATAAAGCAGCATTAGGATTTTTAGAAGGTGATATGAATGAGAATATGTTGATAACATATATAGCCCCAGATCTAATGATGCCTATAAAAGAATTTATAGATAAAATGAGTTTTGGTTTTCAAACAAAGGGATACGAGGAATTTAAAGGAACAAATTTGCTAGTAAGCATAGAATTTATAGGAAGATTAACTAATAGAAGTGCCTCCAAATACAAAATAAATGTAAATGACGTGATTGAAAATATGCACTCTAAGGGAATAACTTTCAAGAGCCCTTTAAAAATAAGTTCTGAAGAAAGGGCAGGAGAAGAATGGAAAATTAGTGATTTAATTGAAAGCAAAACTTTGAGTCAGCCTGAAAATTATATAAGTTATCAAAATAGTAAAGGAAATACCAGCATTAGATTTATAAATTACAAACCCAGAACCACAGATGACTTAGAAACAGAAGCATCTGATAGAAATATAATAGATAATAGAAGACATAGTGTTTCAGAGTTTATGGAAAAATTAGATCAAGAAAGTGAGATAAAATATTACGAAAATAAATTAAAGGAAATAAATGAAGAATATAATAACTCTATGAAGTGTGAGTGGCCTAAAATAAGAGATAAAGAACTTTATTTCTATAGAGAATTAGCTAGAGTAAAGAAAGTAAAGAAGAACGAAGATATGGCAGTAGAAATTTTTAAAAACCAAGAAACCAAGATAGAACAGATAAAGAGGAAAGAGCAAGATAAGCATGGCAAAGAAGAGCAAAATCTTGGTAAAATTTTAAGTGAAGAAGAGCAATGGGCAAAGAATGAAAGATTATTTCTTGAAAGTTATGAAGAAGAAATTAATCTAATAAATGAGATGGAGAACATAGAAAACGAAATAGACAATGCAGAACAATATAATGATTTTATAAACACATTAGATGAAGTAGGGTTACATAATCTTGATAATGCAATGGAAGCTATGGAAGTGGACTTAGGAACAGGAAAGAGAAAAAGATATGGAGAAGGTACTG
>Chr07:6679397-6680750:-1
CAAGCAGAGACAATAAATCTTTAAGTTGTATTGATAAACAAAAAGGTAAAAATGAAGACATAGATGAGCTTGAAGATATTGCAGAAGTAGACAAACAGCTCGAAAGATATCAAAGAGATACTCTGAGGGCAATAAGACCTCAACAAATATATTGCATGGGATTTTTTGAGAATAAAAATGGGTTATACAGAATATCTAGAGAAGTAGAGTTAAGCGTTTTAACAAAGCCAGTTGAGTTAAAAATTGTAGCCAAGGAATTTGAAAATGGATTAAAGTATTCAGGGTATAAATATATTCACCAAGGTATGTATATAATAGGAATCAAAGGTATGACAAGAAAGAAATTAGGAGCTAAAGTTTTAATAACTCTGTTAGATAAAAGGTGGGACACAATAGATAAAGCAGCATTAGGATTTTTAGAAGGTGACATGAATGAGAATATGTTGATAACATATATAGCCCCAGATCTAATGATGCCTATAAAAGAATTTATAGATAAAATGAGTTTTGGTTTTCAAACAAAGGGATACGAGGAATTTAAAGGAACAAATTTGCTAGTAAGCATAGAATTTATAGGAAGATTAACTAATAGAAGTGCCTCCAAATACAAAATAAATGTAAATGACGTGATTGAAAATATGCACTCTAAGGGAATAATTTTCATGAGCCCTTTAAAAATAAGTTTTGAAGAAAGGGCAGGAGAAGAATGGAAAATTAGTGATTTAATTGAAAGTAAAACTTTGAGTCAGCCTGAAAATTATATAAGTTATCAAAATAGTAAAGGAAATACCAGCATTAGATTTATAAATTACAAACCCAAAACCACAGATGACTTAGAAACAGAAGCATCTGATAGAAATATAATAGATAATAGAAGACATAGTGTTTCAGAGTTTATGGAAAAATTAGATCAAGAAAGTGAGATAAAATATTACGAAAATAAATTAAAGGAAATAAATGAAGAATATAATAACTCTATGAAGTGTGAGTGGCCTAAAATAAGAGATAAAGAACTTTATTTCTATAGGGAATTAGCTAGAGTAAAGAAAGTAAAGAAGAACGAAGATATGGCAGTAGAAATTTTTAAAAACCACGAAACCAAGATAGAACAGATAAAGAGGATAGAGCAAGATAAGCATGGCAAAGAAGAGCAAAATCTTGGTAAAATTTTAAGTGAAGAAGAGCAATGGGCAGAGAATGAAAGATTATTTCTTGAAAGTTATGAAGAAGAAATTAATCTAATAAATGAGATGGAGAACATAAAAAATGAAATAGACAATGCAGAACAATATAATGATTTTATAAACACATTAGATGAAGTAGGGTTACATAATCTTGATAATGCAATGGAAGC-----------------------------------------------------
>Chr07:18556954-18558339:-1
CAAGCAGAGATGATAA---------CTGTTCTGATAAACAAAAAGGCAAATATGATGACATAGATGAGTTGAAAGATGTTGCACAAGTAGATAAGCAGCTCGAAAGATATCAACGAGATACTTTAAGGGCAATAAGACCTCAACAAGTATACTGCATGGGATTTTTTGAGAATAAGAATGAGCTATATAGAATATCTAGAGAAGTAGAATTAAGTGTTCTAAGAAAACCAGTAGAATTAAAAATAGTAGCTAAAGAATTTGAAAATAGTTTAAAATATTCAGGATATAAGTATATTCACCAAGATATGTACATAATAGGAATCAAAGGAATGACAAGAAAGAAATTAGGAGCTAAAGTGTTAATAACCTTATTAGATAAAAGATGGGACACAATAAACAAAGCATCTTTAGGCTATCTAGAAGGAGATATGAATGAAAATATGTTGATAACCTATATAGCGCCTGATTTAATGATGCCTGTAAATGAATTCATAGATAAAATGAGTTTTGGTTTTCAAACAAAAGGATACGAAGAGTTTAAGGGAACAAATTTATTAATAAGTATAGAATTTATAGGAAGATTGACTAATAGAAGTGCCTCCAAATACAAAATCAATGTAAATGATGTGATAGAAAAAATGCATTCTAAAGGAATAAAATTTATGAGCCCTTTAACAATAGACTCTGAAGAAAGAGCAGGAGAAAAATGGCCAATTAGTGAATTTATAAAAAATAAAACCTTGAGTCAGCCTGAAAACTTCATAAGTTACCAAGACAGCAAAGGGAATGTTAGTATTAGATTTACAAATTATAAAACCAGAGCTTCGGATGATTTGGATGCAGAATCATCTGACAGAAATATTATAGATAACAGAAGACATAGTATATCTGAATTGATGGAAAAATTAGACCATGAAAGTGAAATAAAATATTATGAAGATAAATTAAGAGATATAGCAGATGAATATAATAACTCTATGAAAAGTGAGTGGCCTAAAATTAGAGACAAGGAACTTTATTTCTATAGAGAACTATCCAGGATCAAGAAACAAAAAAAAGAGAAAAGCTTGGCCATAGAAACCCCCAGAACCCAGGAAATTAAAATAGAACAAATAAA---------GTCAGAAGAACCAAGAGAAGAAATCCAGAAGTTTGATAAGGTATTAAGTGAGGAAGAGCAATGGGAAGTAAATGAGAAATTATTACTAGAGAGTTATGAAGAAGAAAACAACCTGATAGAGGAAATAGAGAATATAGAA---GAAGAAGATAATGCAGAACAATATAATGATTTTATAGACTCATTGGATGAGGTAGGTTTGCATAATCTAGATAATGCAATGGAAGCTATGGAAGTAGATTTGGGAACAGGAAAAAGGAAAAGATACGGAGAGAGTTCTG
>Chr08:4250558-4251964:-1
CAAGCAGAGACGATAAATCTTTAAGTTGTATTGATAAACAAAAAGGTAAAAATGAAGACATAGATGAGCTTGAAGATATTGCAGAAGTAGACAAACAGCTCGAAAGATATCAAAGAGATACTCTGAGGGCAATAAGACCTCAACAAATATATTGCATGGGATTTTTTGAGAATAAAAATGGGTTATACAGAATATCTAGAGAAGTAGAGTTAAGCGTTTTAACAAAGCCAGTTGAGTTAAAAATTGTAGCCAAGGAATTTGAAAATGGATTAAAGTATTCAGGGTATAAATATATTCACTAAGGTATGTATATAATAGGAATCAAAGGTATGACAAGAAAGAAATTAGGAGCTAAAGTTTTAATAACTCTGTTAGATAAAAGGTGGGACACAATAGATAAAGCAGCATTAGGATTTTTAGAAGGTGACATGAATGAGAATATGTTGATAACATATATAGCCCCAGATCTAATGATGCCTATAAAAGAATTTATAGATAAAATGAGTTTTGGTTTTCAAATAAAGGGATACGAGGAATTTAAATGAACAAATTTGCTAGTAAGCATAGAATTTATAGGAAGATTAACTAATAGAAGTGCCTCCAAATACAAAATAAATGTAAATGACGTGATTGAAAATATGCACTCTAAGGGAATAACTTTCATGAGCCCTTTAAAAATAAGTTCTGAAGAAAGGGCAGGAGAAGAATGGAAAATTAGTGATTTAATTGAAAGCAAAATTTTGAGTCAGCCTGAAAATTATATAAGTTATCAAAATAGTAAAGGAAATACCAGCATTAGATTTATAAATTACAAACCCAGAACCACAGATGACTTAGAAACAGAAGCATCTGATAGAAATATAATAGATAATAGAAGACATAGTGTTTCAGAGTTTATGGAAAAATTAGATCAAGAAAGTGAGATAAAATATTACGAAAATAAATTAAAGGAAATAAATGAAGAATATAATAACTCTATGAAGTGTGAGTGGCCTAAAATAAGAGATAAAGAACTTTATTTCTATAGAGAATTAGCTAGAGTAAAGAAAGTAAAGAAGAACGAAGATATGGCAGTAGAAATTTTTAAAAACCAAGAAACCAAGATAGAACAGATAAAGAGGAAAGAGCAAGATAAGCATGGCAAAGAAGAGCAAAATCTTTGTAAAATTTTAAGTGAAGAAGAGCAATGGGCAAAGAATGAAAGATTATTTCTTGAAAGTTATGAAGAAGAAATTAATCTAATAAATGAGATGGAGAACATAGAAAATGAAATAGACAATGCAGAACAATATAATGATTTTATAAACACATTAGATGAAGTAGGGTTACATAATCTTGATAATGCAATGGAAGCTATGGAAGTGGACTTAGGAACAGGAAAGAGAAAAAGATATGGAGAAGGTACTG
>Chr08:11282868-11284274:1
CAAGCAGAGACGATAAATCTTTAAGTGGTATTGTTAAACAAAAAGGTAAAAATGAAGACATAGATGAGCTTGAAGATATTGCAGAAGTAGACAAACAGCTCGAAAGATATCAAAGAGATACTTTGAGGGCAATAAGACCTCAACAAATATATTGCATGGGATTTTTTGAGAATAAAAATGGGTTATACAGAATATCTAGAGAAGTAGAGTTAAGTGTTTTAACAAAGCCAGTTGAGCTAAAAATTGTAGCCAAGGAATTTGAAAATGGATTAAAGTATTCAGGGTATAAATATATTCACCAAGGTATGTATATAATAGGAATCAAAGGTATGACAAGAAAGAAATTAGGAGCTAAAGTTCTAATAACTCTGTTAGATAAAAGGTGGGACACAATAGATAAAGCAGCATTAGGATTTTTAGAAGGTGACATGAATGAGAATATGTTGATAACATATATAGCCCCAGATCTAATGATGCCTATAAAAGAATTTATAGATAAAATGAGTTTTGGTTTTCAAACAAAGGGATACGAGGAATTTAAAGGAACAAATTTGCTAGTAAGCATAGAATTTATAGGAAGATTAACTAATAGAAGTGCCTCCAAATACAAAATAAATGTAAATGACGTGATTGAAAATATGCACTCTAAGGGAATAACTTTCATGAGCCCTTTAAAAATAAGTTCTGAAGAAAGGGCAGGAGAAGAATGGAAAATTAGTGATTTAATTGAAAGCAAAACTTTGAGTCAGCCTGAAAATTTTATAAGTTATCAAAACAGTAAAGGAAATACAAGCATTAGATTTATAAATTACAAACCCAGAACCACAGATGACTTAGAAACAGAAGCATCTGATAGAAATATAATAGATAATAGAAGACATAGTGTTTCAGAGTTTATGGAAAAATTAGATCAAGAAAGTGAGATAAAATATTACGAAAATAAATTAAAGGAAATAAATGAAGAATATAATAACTCTATGAAGTGTGAGTGGCCTAAAATAAGAGATAAAGAACTTTATTTCTATAGAGAATTAGCTAGAGTAAAGAAAGTAAAGAAGAACGAAGATATGGCAGTAAAAATTTTTAAAAACCAAGAAACCAAGATAGAACAGATAAAGAGGAAAGAGCAAGATAAGCATGGCAAAGAAGAGCAAAATCTTGGTAAAATTTTAAGTGAAGAAGAGCAATGGGCAGAGAATGAAAGATTATTTCTTGAAAGTTACGAAGAAGAAATTAATCTAATAAATGAGATGGAGAATATAGAAAATGAAATAGACAATACAGAACAATATAATGATTTTATAAACACATTAGATGAAGTAGGGTTACATAATCTTGATAATGCAATGGAAGCTATGGAAGTGGACTTAGGAACAGGAAAGAGAAAAAGATATGGAGAAGGTACTG
>Chr08:11303451-11304818:1
CAAGCAGAGATGATAA---------CTGTTCTGATAAACAAAAAGGTAAAAATGAAGACATAGATGAGCTTGAAGATATTGCAGAAGTAGACAAACAGCTCGAAAGATATCAACGAGATACTTTAAGGGCAATAAGACCTCAACAAATATATTGCATGGGATTTTTTGAGAATAAAAATGGGTTATACAGAATATCTAGAGAAGTAGAGTTAAGCGTTTTAACAAAGCCAGTTGAGCTAAAAATTGTAGCCAAGGAATTTGAAAATGGATTAAAGTATTCAGGGTATAAATATATTCACCAAGGTATGTATATAATAGGAATCAAAGGTATGACAAGAAAGAAATTAGGAGCTAAAGTTCTAATAACTCTGTTAGATAAAAGGTGGGACACAATAGATAAAGCAGCATTAGGATTTTTAGAAGGTGACATGAATGAGAATATGTTGATAACATATATAGCCCCAGATCTAATGATGCCTATAAAAGAATTTATAGATAAAATGAGTTTTGGTTTTCAAACAAAGGGATACGAGGAATTTAAAGGAACAAATTTGCTAGTAAGCATAGAATTTATAGGAAGATTAACTAATAGAAGTGCCTCCAAATACAAAATAAATGTAAATGACGTGATTGAAAATATGCACTCTAAGGGAATAACTTTCATGAGCCCTTTAAAAATAAGTTCTGAAGAAAGGGCAGGAGAAGAATGGAAAATTAGTGATTTAATTGAAAGCAAAACTTTGAGTCAGCCTGAAAATTATATAAGTTATCAAAATAGTAAAGGAAATACCAGCATTAGATTTATAAATTACAAACCCAGAACCACAGATGACTTAGAAACAGAAGCATCTGATAGAAATATAATAGATAATAGAAGACATAGTGTTTCAGAGTTTATGGAAAAATTAGATCAAGAAAGTGAGATAAAATATTACGAAAATAAATTAAAGGAAATAAATGAAGAATATAATAACTCTATGAAGTGTGAGTGGCCTAAAATAAGAGATAAAGAACTTTATTTCTATAGAGAATTAGCTAGAGTAAAGAAAGTAAAGAAGAACGAAGATATGGCAGTAGAAATTTTTAAAAACCAAGA------------------------------GCAAGATAAGCATGACAAAGAAGAGCAAAATCTTGGTAAAATTTTAAGTGAAGAAGAGCAATGGGCAGAGAATGAAAGATTATTTCTTGAAAGTTATGAAGAAGAAATTAATCTAATAAATGAGATGGAGAATATAGAAAATGAAATAGACAATACAGAACAATATAATGATTTTATAAACACATTAGATGAAGTAGGGTTACATAATCTTGATAATGCAATGGAAGCTATGGAAGTGGACTTAGGAACAGGAAAGAGAAAAAGATATGGAGAAGGTACTG
>Chr08:11307632-11308999:1
CAAGCAGAGATGATAA---------CTGTTCTGATAAACAAAAAGGTAAAAATGAAGACATAGATGAGCTTGAAGATATTGCAGAAGTAGACAAACAGCTCGAAAGATATCAACGAGATACTTTAAGGGCAATAAGACCTCAACAAATATATTGCATGGGATTTTTTGAGAATAAAAATGGGTTATATAGAATATCTAGAGAAGTAGAGTTAAGCGTTTTAACAAAGCCAGTTGAGCTAAAAATTGTAGCCAAGGAATTTGAAAATGGATTAAAGTATTCAGGGTATAAATATATTCACCAAGGTATGTATATAATAGGAATCAAAGGTATGACAAGAAAGAAATTAGGAGCTAAAGTTCTAATAACTCTGTTAGATAAAAGGTGGGACACAATAGATAAAGCAGCATTAGGATTTTTAGAAGGTGACATGAATGAGAATATGTTGATAACATATATAGCCCCAGATCTAATGATGCCTATAAAAGAATTTATAGATAAAATGAGTTTTGGTTTTCAAACAAAGGGATACGAAGAATTTAAAGGAACAAATTTGCTAGTAAGCATAGAATTTATAGGAAGATTAACTAATAGAAGTGCCTCCAAATACAAAATAAATGTAAATGACGTGATTGAAAATATGCACTCTAAGGGAATAACTTTCATGAGCCCTCTAAAAATAAGTTCTGAAGAAAGGGCAGGAGAAGAATGGAAAATTAGTGATTTAATTGAAAGCAAAACTTTGAGTCAGCCTGAAAATTATATAAGTTATCAAAATAGTAAAGGAAATACCAGCATTAGATTTATAAATTACAAAACCAGAACCACAGATGACTTAGAAACAGAAGCATCTGATAGAAATATAATAGATAATAGAAGACATAGTGTTTCAGAGTTTATGGAAAAATTAGATCAAGAAAGTGAGATAAAATATTACGAAAATAAATTAAAGGAAATAAATGAAGAATATAATAACTCTATGAAGTGTGAGTGGCCTAAAATAAGAGATAAAGAACTTTATTTCTATAGAGAATTAGCTAGAGTAAAGAAAGTAAAGAAGAATGAAGATATGGCAGTAGAAATTTTTAAAAACCAAGA------------------------------GCAAGATAAGCATGACAAAGAAGAGCAAAATCTTGGTAAAATTTTAAGTGAAGAAGAGCAATGGGCAGAGAATGAAAGATTATTTCTTGAAAGTTATGAAGAAGAAATTAATCTAATAAATGAGATGGAGAATATAGAAAATGAAATAGACAATACAGAACAATATAATGATTTTATAAACACATTAGATGAAGTAGGGTTACATAATCTTGATAATGCAATGGAAGCTATGGAAGTGGACTTAGGAACAGGAAAGAGAAAAAGATATGGAGAAGGTACTG
>Chr08:11311813-11313180:1
CAAGCAGAGATGATAA---------CTGTTCTGATAAACAAAAAGGTAAAAATGAAGACATAGATGAGCTTGAAGATATTGCAGAAGTAGACAAACAGCTCGAAAGATATCAACGAGATACTTTAAGGGCAATAAGACCTCAACAAATATATTGCATGGGATTTTTTGAGAATAAAAATGGGTTATATAGAATATCTAGAGAAGTAGAGTTAAGCGTTTTAACAAAGCCAGTTGAGCTAAAAATTGTAGCCAAGGAATTTGAAAATGGATTAAAGTATTCAGGGTATAAATATATTCACCAAGGTATGTATATAATAGGAATCAAAGGTATGACAAGAAAGAAATTAGGAGCTAAAGTTCTAATAACTCTGTTAGATAAAAGGTGGGACACAATAGATAAAGCAGCATTAGGATTTTTAGAAGGTGACATGAATGAGAATATGTTGATAACATATATAGCCCCAGATCTAATGATGCCTATAAAAGAATTTATAGATAAAATGAGTTTTGGTTTTCAAACAAAGGGATACGAAGAATTTAAAGGAACAAATTTGCTAGTAAGCATAGAATTTATAGGAAGATTAACTAATAGAAGTGCCTCCAAATACAAAATAAATGTAAATGACGTGATTGAAAATATGCACTCTAAGGGAATAACTTTCATGAGCCCTCTAAAAATAAGTTCTGAAGAAAGGGCAGGAGAAGAATGGAAAATTAGTGATTTAATTGAAAGCAAAACTTTGAGTCAGCCTGAAAATTATATAAGTTATCAAAATAGTAAAGGAAATACCAGCATTAGATTTATAAATTACAAACCCAGAACCACAGATGACTTAGAAACAGAAGCATCTGATAGAAATATAATAGATAATAGAAGACATAGTGTTTCAGAGTTTATGGAAAAATTAGATCAAGAAAGTGAGATAAAATATTACGAAAATAAATTAAAGGAAATAAATGAAGAATATAATAACTCTATGAAGTGTGAGTGGCCTAAAATAAGAGATAAAGAACTTTATTTCTATAGAGAATTAGCTAGAGTAAAGAAAGTAAAGAAGAATGAAGATATGGCAGTAGAAATTTTTAAAAACCAAGA------------------------------GCAAGATAAGCATGACAAAGAAGAGCAAAATCTTGGTAAAATTTTAAGTGAAGAAGAGCAATGGGCAGAGAATGAAAGATTATTTCTTGAAAGTTATGAAGAAGAAATTAATCTAATAAATGAGATGGAGAATATAGAAAATGAAATAGACAATACAGAACAATATAATGATTTTATAAACACATTAGATGAAGTAGGGTTACATAATCTTGATAATGCAATGGAAGCTATGGAAGTGGACTTAGGAACAGGAAAGAGAAAAAGATATGGAGAAGGTACTG
>Chr08:11315994-11317361:1
CAAGCAGAGATGATAA---------CTGTTCTGATAAACAAAAAGGTAAAAATGAAGACATAGATGAGCTTGAAGATATTGCAGAAGTAGACAAACAGCTCGAAAGATATCAACGAGATACTTTAAGGGCAATAAGACCTCAACAAATATATTGCATGGGATTTTTTGAGAATAAAAATGGGTTATATAGAATATCTAGAGAAGTAGAGTTAAGCGTTTTAACAAAGCCAGTTGAGCTAAAAATTGTAGCCAAGGAATTTGAAAATGGATTAAAGTATTCAGGGTATAAATATATTCACCAAGGTATGTATATAATAGGAATCAAAGGTATGACAAGAAAGAAATTAGGAGCTAAAGTTCTAATAACTCTGTTAGATAAAAGGTGGGACACAATAGATAAAGCAGCATTAGGATTTTTAGAAGGTGACATGAATGAGAATATGTTGATAACATATATAGCCCCAGATCTAATGATGCCTATAAAAGAATTTATAGATAAAATGAGTTTTGGTTTTCAAACAAAGGGATACGAAGAATTTAAAGGAACAAATTTGCTAGTAAGCATAGAATTTATAGGAAGATTAACTAATAGAAGTGCCTCCAAATACAAAATAAATGTAAATGACGTGATTGAAAATATGCACTCTAAGGGAATAACTTTCATGAGCCCTCTAAAAATAAGTTCTGAAGAAAGGGCAGGAGAAGAATGGAAAATTAGTGATTTAATTGAAAGCAAAACTTTGAGTCAGCCTGAAAATTATATAAGTTATCAAAATAGTAAAGGAAATACCAGCATTAGATTTATAAATTACAAACCCAGAACCACAGATGACTTAGAAACAGAAGCATCTGATAGAAATATAATAGATAATAGAAGACATAGTGTTTCAGAGTTTATGGAAAAATTAGATCAAGAAAGTGAGATAAAATATTACGAAAATAAATTAAAGGAAATAAATGAAGAATATAATAACTCTATGAAGTGTGAGTGGCCTAAAATAAGAGATAAAGAACTTTATTTCTATAGAGAATTAGCTAGAGTAAAGAAAGTAAAGAAGAATGAAGATATGGCAGTAGAAATTTTTAAAAACCAAGA------------------------------GCAAGATAAGCATGACAAAGAAGAGCAAAATCTTGGTAAAATTTTAAGTGAAGAAGAGCAATGGGCAGAGAATGAAAGATTATTTCTTGAAAGTTATGAAGAAGAAATTAATCTAATAAATGAGATGGAGAATATAGAAAATGAAATAGACAATACAGAACAATATAATGATTTTATAAACACATTAGATGAAGTAGGGTTACATAATCTTGATAATGCAATGGAAGCTATGGAAGTGGACTTAGGAACAGGAAAGAGAAAAAGATATGGAGAAGGTACTG
>Chr08:11329538-11330913:-1
CAAGCAGAGACGATAAATCTTTAAGTGGTATTGTTAAACAAAAAGGTAAAAATGAAGACATAGATGAGCTTGAAGATATTGCAGAAGTAGACAAACAGCTCGAAAGATATCAAAGAGATACTTTGAGGGCAATAAGACCTCAACAAATATATTGCATGGGATTTTTTGAGAATAAAAATGGGTTATACAGAATATCTAGAGAAGTAGAGTTAAGCGTTTTAACAAAGCCAGTTGAGTTAAAAATTGTAGCCAAGGAATTTGAAAATGGATTAAAGTATTCAGGGTATAAATATATTCACCAAGGTATGTATATAATAGGAATCAAAGGTATGACAAGAAAGAAATTAGGAGCTAAAGTTCTAATAACTCTGTTAGATAAAAGGTGGGACACAATAGATAAAGCAGCATTAGGATTTTTAGAAGGAGACATGAATGAGAATATGTTGATAACATATATAGCCCCAGATCTAATGATGCCTATAAAAGAATTTATAGATAAAATGAGTTTTGGTTTTCAAACAAAGGGATACGAAGAATTTAAAGGAACAAATTTGCTAGTAAGCATAGAATTTATAGGAAGATTAACTAATAGAAGTGCCTCCAAATACAAAATAAATGTAAATGACGTGATTGAAAATATGCACTCTAAGGGAATAACTTTCATGAGCCCTCTAAAAATAAGTTCTGAAGAAAGGGCAGGAGAAGAATGGAAAATTAGTGATTTAATTGAAAGCAAAACTTTGAGTCAGCCTGAAAATTTTATAAGTTATCAAAACAGTAAAGGAAATACAAGCATTAGATTTATAAATTACAAACCCAGAACCACAGATGACTTAGAAACAGAAGCATCTGATAGAAATATAATAGATAATAGAAGACATAGTGTTTCAGAGTTTATGGAAAAATTAGATCAAGAAAGTGAGATAAAATATTACGAAAATAAATTAAAGGAAATAAATGAAGAATATAATAACTCTATGAAGTGTGAGTGGCCTAAAATAAGAGATAAAGAACTTTATTTCTATAGAGAATTAGCTAGAGTAAAGAAAGTAAAGAAGAACGAAGATATGGCAGTAGAAATTTTTAAAAACCAAGA------------------------------GCAAGATAAGCATGACAAAGAAGAGCAAAATCTTGGTAAAATTTTAAGTGAAGAAGAGCAATGGGCAGAGAATGAAAGATTATTTCTTGAAAGTTATGAAGAAGAAATTAATCTAATAAATGAGATGGAGAATATAGAAAATGAAATAGACAATACAGAACAATATAATGATTT-ATAAACACATTAGATGAAGTAGGGTTACATAATCTTGATAATGCAATGGAAGCTATGGAAGTGGACTTAGGAACAGGAAAGAGAAAAAGATATGGAGAAGGTACTG
>Chr08:20264690-20266083:1
CAAGCAGAGACGATAA---------CTGTTTTGATAAACAAAAAGGCAAATATGATGACATAGATGAGCTGAAAGATGTTGCACAAGTAGATAAGCAGCTCGAAAGATATCAACGAGATACTTTAAGGGCAATAAGACCTCAACAAGTATACTGCATGGGATTTTTTGAGAATAAGAATGGGCTATATAGAATATCTAGAGATGTAGAATTAAGTGTTCTAACAAAACCAGTAGAATTAAAAATAGTAGCTAAAGAATTTGAAAATAGTTTAAAATATTCAGGATATAAATATATTCACCAAGGTATGTACATAATAGGAATCAAAGGAATGACAAGAAAGAAATTAGGAGCTAAAGTGTTAATAACCTTATTAGATAAAAGATGGGACACAATAAACAAAGCATCTTTAGGCTATCTAGAAGGAGATATGAATGAAAATATGTTGATAACCTATATAGTGCCTGATTTAATGATGCCTGTAAATGAATTCATAGATAAAATGAGTTTTGGTTTTCAAACAAAAGGATACGAAGAGTTTAAAGGAACAAATTTATTAATAAGTATAGAATTTATAGGAAGATTGACTAATAGAAGTGCCTCCAAATACAAAATCAATGTAAATGATTTGATAGAAAAAATGCATTCTAAAGGAATAAAATTCATGAGCCCTTTAACAATAGACTCTGAAGAAAGAGCAGGAGAAAAATGGCCAATTAGTGAATTTATAAAAAATAAAACCTTGAGTCAGCCTGAAAACTTCATAAGTTACCAAGATAGCAAAGGGAATGTTAGTATTAGATTTACAAATTATAAAACCAGAGCTTCGGATGATTTGGATGCAGAATCATCTGACAGAAATATTATAGATAACAGAAGACATAGTATTTCTGAATTGATGGAAAAATTAGATCATGAAAGTGAAATAAAATATTATGAAGATAAATTAAGAGATATAGCAGATGAATATAATAACTCTATAAATAGTGAGTGGCCTAAAATTAGAGACAAGGAACTTTATTTCTATAGAGAACTATCCAGGATTAAGAAACAAAAAAAAGAGAAAAGCTTGGCCATAGAAACCCCCAGAACCCAGGAAATTAAAATAGAACAAATAAA---------GTCAGAAGAACCAAGAGAAGAAATCCAAAAGTTTGATAAGGTATTAAGTAAGGAAGAGCAATGGGAAGTAAATGAGAAATTATTACTAGAGAGTTATGAAGAAGAAAACAACCTGATAGAGGAAATAGAGAATATAGAA---GAAGAAGATAATGCAGAACAATATAATGATTTTATAGACTCATTGGATGAGGTAGGTTTGCATAATCTAGATAATGCAATGGAAGCCATGGAAGTAGATTTGGGAACAGGAAAAAGGAAAAGATACGGAGAGGGTTCTG
>Chr08:21348894-21350300:-1
CAAGCAGAGACGATAAATCTTTAAGTTGTATTGAGAAACAAAAAGGTAAAAATGAAGACATAGATGAGCTTGAAGATATTGCAGAAGTAGACAAACTGCTCGAAAGATATCAAAGAGATACTCTGAGGGCAATAAGACCTCAACAAATATATTGCATGGGATTTTTTGAGAATAAAAATGGGTTATACAGAATATCTAGAGAAGTAGAGTTAAGCGTTTTAACAAAGCCAGTTGAGTTAAAAATTGTAGCCAAGGAATTTGAAAATGGATTAAAGTATTCAGGGTATAAATATATTCACCAAGGTATGTATATAATAGGAATCAAAGGTATGACAAGAAAGAAATTAGGAGCTAAAGTTTTAATAACTCTGTTAGATAAAAGGTGGGACACAATAGATAAAGCAGCATTAGGATTTTTAGAAGGTGATATGAATGAGAATATGTTGATAACATATATAGCCCCAGATCTAATGATGCCTATAAAAGAATTTATAGATAAAATGAGTTTTGGTTTTCAAATAAAGGGATACGAAGAATTTAAAGGAACAAATTTGCTAGTAAGCATAGAATTTATAGGAAGATTAACTAATAGAAGTGCCTCCAAATACAAAATAAATGTAAATGATGTGATTGAAAATATGCACTCTAAGAGAATAACTTTCATGAGCCCTTTAAAAATAAGTTCTGAAGAAAGGGCAGGAGAAGAATGGAAAATTAGTGATTTAATTGAAAGCAAAACTTTGAGTCGGCCTGAAAATTATATAAGTTATCAAAACAGTAAAGGAAATAGCAGCATTAGATTTATAAATTACAAACCCAGAACCACAGATGACTTAGAAACAGAAGCATCTGATAGAAATATAATAGATAATAGAAGACATAGTGTTTCAGAGTTTATGGAAAAATTAGATCAAGAAAGTGAGATAAAATATTACGAAAATAAATTAAAGGAAATAAATGAAGAATATAATAACTCTATGAAGAGTGAGTGGCCTAAAATAAGAGATAAAAAACTTTATTTCTATAGAGAATGAGCTAGAGTAAAGAAAGTAAAGAAGAACGAAGATATGGCAGTAGAAATTTTTAAAAACCAAGAAACCAAGATAGAACAGATAAAGAGAAAAGAGCAAGATAAGCATGGCAAAGAAGAACAAAATCTTGGTAAAATTTTAAGTGAAGAAGAGCAATGGGCAGAGAATGAAAGATTATTTCTTGAAAGTTATGAAGAAGAAATTAATCTAATAAATAAGATGGAGAATATAGAAAATGAAATAGACAATGCAGAACAATATAATGATTTTATAAACACATTATATGAAGTAGGATTACATAATCTTGATAATGCAATGGAAGCTATGGAAGTGGACTTAGTAACAGGAAAGAGAAAAAGATATGGAGAAGGTACTG
>Chr08:25009907-25011313:-1
CAAGCAGAGACGATAAATCTTTAAGTTGTATTGATAAACAAAAAGGTAAAAATGAAGACATAGATGAGCTTGAAGATATTGCAGAAGTAGACAAACAGCTCGAAAGATATCAAAGAGATACTCTGAGGGCAATAAGACCTCAACAAATATATTGCATGGGATTTTTTGAGAATAAAAATGGGTTATACAGAATATCTAGAGAAGTAGAGTTAAGCGTTTTAACAAAGCCAGTTGAGCTAAAAATTGTAGCCAAGGAATTTGAAAATGGATTAAAGTATTCAGGGTATAAATATATTCACCAAGGTATGTATATAATAGGAATCAAAGGTATGACAAGAAAGAAATTAGGAGCTAAAGTTCTAATAACTCTGTTAGATAAAAGGTGGGACACAATAGATAAAGCAGCATTAGGATTTTTAGAAGGTGACATGAATGAGAATATGTTGATAACATATATAGCCCCAGATCTAATGATGCCTATAAAAGAATTTATAGATAAAATGAGTTTTGGTTTTCAAACAAAGGGATACGAGGAATTTAAAGGAACAAATTTGCTAGTAAGCATAGAATTTATAGGAAGATTAACTAATAGAAGTGCCTCCAAATACAAAATAAATGTAAATGACGTGATTGAAAATATGCACTCTAAGGGAATAACTGTCATGAGCCCTTTAAAAATAAGTTCTGAAGAAAGGGCAGGAGAAGAATGGAAAATTAGTGATTTAATTGAAAGCAAAACTTTGAGTCAGCCTGAAAATTATATAAGTTATCAAAATAGTAAAGGAAATACCAGCATTAGATTTATAAATTACAAACCCAGAACCACAGATGACTTAGAAACATAAGCATATGATAGAAATATAATAGATAATAGAAGACATAGTGTTTCAGAGTTTATGGAAAAATTAGATCAAGAAAGTGAGATAAAATATTACGAAAATAAATTAAAGGAAATAAATGAAGAATATAATAACTCTATGAAGTGTGAGTGGCCTAAAATAAGAGATAAAGAACTTTATTTCTATAGAGAATTAGCTAGAGTAAAGAAAGTAAAGAAGAACGAAGATATGGCAGTAGAAATTTTTAAAAACCAAGAAACCAAGATAGAACAGATAAAGAGGAAAGAGCAAGATAAGCATGGTAAAGAAGAGCAAAATCTTGGTAAAATTTTAAGTGAAGAAGAGCAATGGGCAGAGAATGAAAGATTATTTCTTGAAAGTTATGAAGAAGAAATTAATCTAATAAATGAGATGGAGAACATAAAAAATGAAATAGACAATGCAGAACAATATAATGATTTTATAAACACATTAGATGAAGTAGGGTTACATAATCTTGATAATGCAATGGAAGCTATGGAAGTGGACTTAGGAACAGGAAAGAGAAAAAGATATGGAGAAGGTACTG
>Chr08:11161921-11163168:-1
--------------------------------------------------------------------------------------------------------------------------------------------------ATATAATGCATGGGATTTTTTGAGAATAAGAATGGGCTTTATAGAATATCTAGAGAAGTAGAATTAAGTGTTCTAACAAAGCCAGTAGAATTAAAAATAGTAGCTAAAGAATTTGAAAATAGTTTAAAATATTCAGGATATAAGTATATTCACCAAGGTATGTACATAATAGGAATCAAAGGAATGACAAGAAAGAAATTAGGAGCTAAAGTGCTAATAACCTTATTAGATAAAAGATGGGACACAATAAACAAAGCATCTTTAGGCTATCTAGAAGGAGATATGAATGAAAATATGTTGATAACCTATATAGCGCCTGATTTAATGATGCCTGTAAATGAATTCATAGATAAAATGAGTTTTGGTTTCCAAACAAAAGGATACGAAGAGTTTAAGGGAACAAATTTATTAATAAGTATAGAATTTATAGGAAGATTGACTAATAGAAGTGCCTCCAAATACAAAATCAATGTAAATGATGTGATAGAAAAAATTCATTCTAAAGGAATAAAATTCATGAGCCCTTTAATAATAGACTCTGAAGAAAGAGCAGGAGAAAAATGGCCAATTAGTGAATTTATAAAAAATAAAACCTTGAGTCAGCCTGAAAACTTCATAAGTTACCAAGACAGCAAAGGGAATGTTAGTATTAGATTTACAAATTATAAAACCAGAGCTTCGGATGATTTGGATGCAGAATCATCTGACAGAGATATTATAGATAACAGAAGACATAGTATATCTGAATTGATGGAAAAATTAGACCATGAAAGTGAAATAAAATATTATGAAGATAAATTAAGAGATATAGCAGATGAATATAATAACTCTATGAAAAGTGAGTGGCCTAAAATTAGAGACAAGGAACTTTATTTCTATAGAGAACTATCCAGGATTAAGAAACAAAAAAA-GAGAAAAGCTTGGTCATAGAAACCCCCAGAACCCAGGAAATTAAAATAGAACAAATAAA---------GTCAGAAGAACCAAGAGAAGAAATCCAAAAGTTAGATAAGGTATTAAGTGAGGAAGAGCAATGGGAAGTAAATGAGAAATTATTACTAGAGAGTTATGAAGAAGAAAACAACCTGATAGAGGAAATAGAGAATATAGAA---GAAGAAGATAATGCAGAACAATATAATGATTTTATAGACTCATTGGATGAGGAAGGTTTGCATAATCTAGATAATGCAATGGAAGCTATGGAAGTAGATTTGGGAACAGGAAAAAGGAAAAGATACGGAGAGGGTTCTG
>Chr08:11164332-11165729:1
CAAGCAGAGATGATAA---------CTGTTCTGATAAACAAAAAGGTAAAAATGAAGACATAGATGAGCTTGAAGATATTGCAGAAGTAGACAAACAGCTCGAAAGATATCAACGAGATACTTTAAGGGCAATAAGACCTCAACAAATATATTGCATGGGATTTTTTGAGAATAAAAATGGGTTATACAGAATATCTAGAGAAGTAGAGTTAAGCGTTTTAACAAAGCCAGTTGAGTTAAAAATTGTAGCCAAGGAATTTGAAAATGGATTAAAGTATTCAGGGTATAAATATATTCACCAAGGTATGTATATAATAGGAATCAAAGGTATGACAAGAAAGAAATTAGGAGCTAAAGTTCTAATAACTCTGTTAGATAAAAGGTGGGACACAATAGATAAAGCAGCATTAGGATTTTTAGAAGGTGACATGAATGAGAATATGTTGATAACATATATAGCCCCAGATCTAATGATGCCTATAAAAGAATTTATAGATAAAATGAGTTTTGGTTTTCAAACAAAGGGATACGAAGAATTTAAAGGAACAAATTTGCTAGTAAGCATAGAATTTATAGGAAGATTAACTAATAGAAGTGCCTCCAAATACAAAATAAATGTAAATGACGTGATTGAAAATATGCACTCTAAGGGAATAACTTTCATGAGCCCTTTAAAAATAAGTTCTGAAGAAAGGGCAGGAGAAGAATGGAAAATTAGTGATTTAATTGAAAGCAAAACTTTGAGTCAGCCTGAAAATTTTATAAGTTATCAAAACAGTAAAGGAAATACAAGCATTAGATTTATAAATTACAAACCCAGAACCACAGATGACTTAGAAACAGAAGCATCTGATAGAAATATAATAGATAATAGAAGACATAGTGTTTCAGAGTTTATGGAAAAATTAGATCAAGAAAGTGAGATAAAATATTACGAAAATAAATTAAAGGAAATAAATGAAGAATATAATAACTCTATGAAGTGTGAGTGGCCTAAAATAAGAGATAAAGAACTTTATTTCTATAGAGAATTAGCTAGAGTAAAGAAAGTAAAGAAGAACGAAGATATGGCAGTAAAAATTTTTAAAAACCAAGAAACCAAGATAGAACAGATAAAGAGGAAAGAGCAAGATAAGCATGACAAAGAAGAGCAAAATCTTGGTAAAATTTTAAGTGAAGAAGAGCAGTGGGCAGAGAATGAAAGATTATTTCTTGAAAGTTATGAAGAAGAAATTAATCTAATAAATGAGATGGAGAATATAGAAAATGAAATAGACAATACAGAACAATATAATGATTTTATAAACACATTAGATGAAGTAGGGTTACATAATCTTGATAATGCAATGGAAGCTATGGAAGTGGACTTAGGAACAGGAAAGAGAAAAAGATATGGAGAAGGTACTG
>Chr08:11261442-11262839:1
CAAGCAGAGATGATAA---------CTGTTCTGATAAACAAAAAGGTAAAAATGAAGACATAGATGAGCTTGAAGATATTGCAGAAGTAGACAAACAGCTCGAAAGATATCAACGAGATACTTTAAGGGCAATAAGACCTCAACAAATATATTGCATGGGATTTTTTGAGAATAAAAATGGGTTATACAGAATATCTAGAGAAGTAGAGTTAAGCGTTTTAACAAAGCCAGTTGAGTTAAAAATTGTAGCCAAGGAATTTGAAAATGGATTAAAGTATTCAGGGTATAAATATATTCACCAAGGTATGTATATAATAGGAATCAAAGGTATGACAAGAAAGAAATTAGGAGCTAAAGTTCTAATAACTCTGTTAGATAAAAGGTGGGACACAATAGATAAAGCAGCATTAGGATTTTTAGAAGGTGACATGAATGAGAATATGTTGATAACATATATAGCCCCAGATCTAATGATGCCTATAAAAGAATTTATAGATAAAATGAGTTTTGGTTTTCAAACAAAGGGATACGAAGAATTTAAAGGAACAAATTTGCTAGTAAGCATAGAATTTATAGGAAGATTAACTAATAGAAGTGCCTCCAAATACAAAATAAATGTAAATGACGTGATTGAAAATATGCACTCTAAGGGAATAACTTTCATGAGCCCTTTAAAAATAAGTTCTGAAGAAAGGGCAGGAGAAGAATGGAAAATTAGTGATTTAATTGAAAGCAAAACTTTGAGTCAGCCTGAAAATTTTATAAGTTATCAAAACAGTAAAGGAAATACAAGCATTAGATTTATAAATTACAAACCCAGAACCACAGATGACTTAGAAACAGAAGCATCTGATAGAAATATAATAGATAATAGAAGACATAGTGTTTCAGAGTTTATGGAAAAATTAGATCAAGAAAGTGAGATAAAATATTACGAAAATAAATTAAAGGAAATAAATGAAGAATATAATAACTCTATGAAGTGTGAGTGGCCTAAAATAAGAGATAAAGAACTTTATTTCTATAGAGAATTAGCTAGAGTAAAGAAAGTAAAGAAGAACGAAGATATGGTAGTAAAAATTTTTAAAAACCAAGAAACCAAGATAGAACAGATAAAGAGGAAAGAGCAAGATAAGCATGACAAAGAAGAGCAAAATCTTGGTAAAATTTTAAGTGAAGAAGAGCAGTGGGCAGAGAATGAATGATTATTTCTTGAAAGTTATGAAGAAGAAATTAATCTAATAAATGAGATGGAGAATATAGAAAATGAAATAGACAATACAGAACAATATAATGATTTTATAAACACATTAGATGAAGTAGGGTTACATAATCTTGATAATGCAATGGAAGCTATGGAAGTGGACTTAGGAACAGGAAAGAGAAAAAGATATGGAGAAGGTACTG
>Chr08:11268482-11269833:1
-------------------------TTGTTCTGATAAACAAAAAGGTAAAAATGAAGACATAGATGAGCTTGAAGATATTGCAGAAGTAGACAAACAGCTCGAAAGATATCAACGAGATACTTTAAGGGCAATAAGACCTCAACAAATATATTGCATGGGATTTTTTGAGAATAAAAATGGGTTATACAGAATATCTAGAGAAGTAGAGTTAAGCGTTTTAACAAAGCCAGTTGAGTTAAAAATTGTAGCCAAGGAATTTGAAAATGGATTAAAGTATTCAGGGTATAAATATATTCACCAAGGTATGTATATAATAGGAATCAAAGGTATGACAAGAAAGAAATTAGGAGCTAAAGTTCTAATAACTCTGTTAGATAAAAGGTGGGACACAATAGATAAAGCAGCATTAGGATTTTTAGAAGGTGACATGAATGAGAATATGTTGATAACATATATAGCCCCAGATCTAATGATGCCTATAAAAGAATTTATAGATAAAATGAGTTTTGGTTTTCAAACAAAGGGATACGAAGAATTTAAAGGAACAAATTTGCTAGTAAGCATAGAATTTATAGGAAGATTAACTAATAGAAGTGCCTCCAAATACAAAATAAATGTAAATGACGTGATTGAAAATATGCACTCTAAGGGAATAACTTTCATGAGCCCTTTAAAAATAAGTTCTGAAGAAAGGGCAGGAGAAGAATGGAAAATTAGTGATTTAATTGAAAGCAAAACTTTGAGTCAGCCTGAAAATTTTATAAGTTATCAAAACAGTAAAGGAAATACAAGCATTAGATTTATAAATTACAAACCCAGAACCACAGATGACTTAGAAACAGAAGCATCTGATAGAAATATAATAGATAATAGAAGACATAGTGTTTCAGAGTTTATGGAAAAATTAGATCAAGAAAGTGAGATAAAATATTACGAAAATAAATTAAAGGAAATAAATGAAGAATATAATAACTCTATGAAGTGTGAGTGGCCTAAAATAAGAGATAAAGAACTTTATTTCTATAGAGAATTAGCTAGAGTAAAGAAAGTAAAGAAGAACGAAGATATGGCAGTAGAAATTTTTAAAAACCAAGA------------------------------GCAAGATAAGCATGACAAAGAAGAGCAAAATCTTGGTAAAATTTTAAGTGAAGAAGAGCAATGGGCAGAGAATGAAAGATTATTTCTTGAAAGTTATGAAGAAGAAATTAATCTAATAAATGAGATGGAGAATATAGAAAATGAAATAGACAATACAGAACAATATAATGATTTTATAAACACATTAGATGAAGTAGGGTTACATAATCTTGATAATGCAATGGAAGCTATGGAAGTGGACTTAGGAACAGGAAAGAGAAAAAGATATGGAGAAGGTACTG
>Chr08:11275702-11277078:1
CAAGCAGAGACGATAAATCTTTAAGTTGTATTGATAAACAAAAAGGTAAAAATGAAGACATAGATGAGCTTGAGGATATTGCAGAAGTAGACAAACAGCTCGAAAGATATCAACGAGATACTTTAAGGGCAATAAGACCTCAACAAATATATTGCATGGGATTTTTTGAGAATAAAAATGGGTTATACAGAATATCTAGAGAAGTAGAGTTAAGCGTTTTAACAAAGCCAGTTGAGTTAAAAATTGTAGCCAAGGAATTTGAAAATGGATTAAAGTATTCAGGGTATAAATATATTCACCAAGGTATGTATATAATAGGAATCAAAGGTATGACAAGAAAGAAATTAGGAGCTAAAGTTCTAATAACTCTGTTAGATAAAAGGTGGGACACAATAGATAAAGCAGCATTAGGATTTTTAGAAGGAGACATGAATGAGAATATGTTGATAACATATATAGCCCCAGATCTAATGATGCCTATAAAAGAATTTATAGATAAAATGAGTTTTGGTTTTCAAACAAAGGGATACGAGGAATTTAAAGGAACAAATTTGCTAGTAAGCATAGAATTTATAGGAAGATTAACTAATAGAAGTGCCTCCAAATACAAAATAAATGTAAATGACGTGATTGAAAATATGCACTCTAAGGGAATAACTTTCATGAGCCCTTTAAAAATAAGTTCTGAAGAAAGGGCAGGAGAAGAATGGAAAATTAGTGATTTAATTGAAAGCAAAACTTTGAGTCAACCTGAAAATTATATAAGTTATCAAAATAGTAAAGGAAATACCAGCATTAGATTTATAAATTACAAACCCAGAACCACAGATGACTTAGAAACAGAAGCATCTGATAGAAATATAATAGATAATAGAAGACATAGTGTTTCAGAGTTTATGGAAAAATTAGATCAAGAAAGTGAGATAAAATATTACGAAAATAAATTAAAGGAAATAAATGAAGAATATAATAACTCTATGAAGTGTGAGTGGCCTAAAATAAGAGATAAAGAACTTTATTTCTATAGAGAATTAGCTAGAGTAAAGAAAGTAAAGAAGAACGAAGATATGGCAGTAGAAATTTTTAAAAACCAAGA------------------------------GCAAGATAAGCATGACAAAGAAGAGCAAAATCTTGGTAAAATTTTAAGTGAAGAAGAGCAATGGGCAGAGAATGAAAGATTATTTCTTGAAAGTTATGAAGAAGAAATTAATCTAATAAATGAGATGGAGAATATAGAAAATGAAATAGACAATACAGAACAATATAATGATTTTATAAACACATTAGATGAAGTAGGGTTACATAATCTTGATAATGCAATGGAAGCTATGGAAGTGGACTTAGGAACAGGAAAGAGAAAAAGATATGGAGAAGGTACTG
>Chr09:1114385-1115770:-1
CAAGCAGAGATGATAA---------CTGTTCTGATAAACAAAAAGGCAAATATGATGACATAGATGAGCTGAAAGATGTTGCACAAGTAGATAAGCAGCTCGAAAGATATCAACGAGATACTTTAAGGGCAATAAGGCCTCAACAAGTATACTGCATGGGATTTTTTGAGAATAAGAATGGGCTTTATAGAATATCTAGAGAAGTAGAATTAGGTGTTCTAACAAAGCCAGTAGAATTAAAAATAGTAGCTAAAGAATTTGAAAATAGTTTAAAATATTCAGGATATAAGTATATTCACCAAGGTATGTACATAATAGGAATCAAAGGAATGACAAGAAAGAAATTAGGAGCTAAAGTGCTAATAACCTTATTAGATAAAAGATGGGACACAATAAACAAAGCATCTTTAGGCTATCTAGAAGGAGATATGAATGAAAATATGTTGATAACCTATATAGCGCCTGATTTAATGATGCCTGTAAATGAATTCATAGATAAAATGAGTTTTGGTTTCCAAACAAAAGGATACGAAGAGTTTAAGGGAACAAATTTATTAATAAGTATAGAATTTATAGGAAGATTGACTAATAGAAGTGCCTCCAAATACAAAATCAATGTAAATGATGTGATAGAAAAAATGCATTCTAAAGGAATAAAATTCATGAGCCCTTTAATAATAGACTCTGAAGAAAGAGCAGGAGAAAAATGGCCAATTAGTGAATTTATAAAAAATAAAACCTTGAGTCAGCCTGAAAACTTCATAAGTTACCAAGACAGCAAAGGGAATGTTAGTATTAGATTTACAAATTATAAAACCAGAGCTTCGGATGATTTGGATGCAGAATCATCTGACAGAGATATTATAGATAACAGAAGACATAGTATATCTGAATTGATGGAAAAATTAGACCATGAAAGTGAAATAAAATATTATGAAGATAAATTAAGAGATATAGCAGATGAATATAATAACTCTATGAAAAGTGAGTGGCCTAAAATTAGAGACAAGGAACTTTATTTCTATAGAGAACTATCCAGGATTAACAAACAAAAAAAAGAGAAAAGCTTGGTCATAGAAACCCCCAGAACCCAGGAAATTAAAATAGAACAAATAAA---------GTCAGAAGAACCAAGAGAAGAAATCCAAAAGTTAGATAAGGTATTAAGTGAGGAAGAGCAATGGGAAGTAAATGAGAAATTATTACTAGAGAGTTATGAAGAAGAAAACAACCTGATAGAGGAAATAGAGAATATAGAA---GAAGAAGATAATGCAGAACAATATAATGATTTTATAGACTCATTGGATGAGGAAGGTTTGCATAATCTAGATAATGCAATGGAAGCTATGGAAGTAGATTTGGGAACAGGAAAAAGGAAAAGATACGGAGAGGGTTCTG
>Chr09:15201807-15203213:1
CAAGCAGAGACGATAAATCTTTAAGTTGTATTGATAAACAAAAAGGTAAAAATGAAGACATAGATGAGCTTGAAGATATTGCAGAAGTAGACAAACAGCTCGAAAGATATCAACGAGATACTTTAAGGGCAATAAGACCTCAACAAATATATTGCATGGGATTTTTTGAGAATAAAAATGGGTTATACAGAATATCTAGAGAAGTAGAGTTAAGCGTTTTAACAAAGCCAGTTGAGTTAAAAATTGTAGCCAAGGAATTTGAAAATGGATTAAAGTATTCAGGGTATAAATATATTCACCAAGGTATGTATATAATAGGAATCAAAGGTATGACAAGAAAGAAATTAGGAGCTAAAGTTCTAATAACTCTGTTAGATAAAAGGTGGGACACAATAGATAAAGCAGCATTAGGATTTTTAGAAGGTGACATGAATGAGAATATGTTGATAACATATATAGCCCCAGATCTAATGATGCCTGTAAAAGAATTTATAGATAAAATGAGTTTTGGTTTTCAAACAAAGGGATACGAGGAATTTAAAGGAACAAATTTGCTAGTAAGCATAGAATTTATAGGAAGATTAACTAATAGAAGTGCCTCCAAATACAAAATAAATGTAAATGACGTGATTGAAAATATGCACTCTAAGGGAATAACTTTCATGAGCCCTTTAAAAATAAGTTCTGAAGAAAGGGCAGGAGAAGAATGGAAAATTAGTGATTTAATTGAAAGCAAAACTTTGAGTCAGCCTGAAAATTTTATAAGTTATCAAAATAGTAAAGGAAATACCAGCATTAGATTTATAAATTACAAACCCAGAACCACAGATGACTTAGAAACAGAAGCATCTGATAGAAATATAATAGATAATAGAAGACATAGTGTTTCAGAGTTTATGGAAAAATTAGATCAAGAAAGTGAGATAAAATATTACGAAAATAAATTAAAGGAAATAAATGAAGAATATAATAACTCTATGAAGTGTGAGTGGCCTAAAATAAGAGATAAAGAACTTTATTTCTATAGAGAATTAGCTAGAGTAAAGAAAGTAAAGAAGAACGAAGATATGGCAGTAGAAATTTTTAAAACCCAAGAAACCAAGATAGAACAGATAAAGAGGAAAGAGCAAGATAAGTATGACAAAGAAGAGCAAAATCTTGGTAAAATTTTAAGTGAAGAAGAGCAGTGGGCAGAGAATGAAAGATTATTTCTTGAAAGTTATGAAGAAGAAATTAATCTAATAAATGAGATGGAGAATATAGAAAATGAAATAGACAATACAGAACAATATAATGATTTTATAAACACATTAGATGAAGTAGGGTTACATAATCTTGATAATGCAATGGAAGCTATGGAAGTGGACTTAGGAACAGGAAAGAGAAAAAGATATGGAGAAGGTACTG
>Chr09:16868053-16869438:1
CAAGCAGAGACGATAAATCTTTAAGTTGTATTGATAAACAAAAAGGTAAAAATGAAGACATAGATGAGCTTGAAGATATTGCAGAAGTAGACAAACAGCTCGAAAGATATCAAAGAGATACTCTGAGGGCAATAAGACCTCAACAAATATATTGCATGGGATTTTTTGAGAATAAAAATGGGTTATACAGAATATCTAGAGAAGTAGAGTTAAGCGTTTTAACAAAGCCAGTTGAGCTAAAAATTGTAGCCAAGGAATTTGAAAATGGATTAAAGTATTCAGGGTATAAATATATTCACCAAGGTATGTATATAATAGGAATCAAAGGTATGACAAGAAAGAAATTAGGAGCTAAAGTTCTAATAACTCTGTTAGATAAAAGGTGGGACACAATAGATAAAGCAGCATTAGGATTTTTAGAAGGTGACATGAATGAGAATATGTTGATAACATATATAGCCCCAGATCTAATGATGCCTATAAAAGAATTTATAGATAAAATGAGTTTTGGTTTTCAAACAAAGGGATACGAGGAATTTAAAGGAACAAATTTGCTAGTAAGCATAGAATTTATAGGAAGATTAACTAATAGAAGTGCCTCCAAATACAAAATAAATGTAAATGACGTGATTGAAAATATGCACTCTAAGGGAATAACTTTCATGAGCCCTTTAAAAATAAGTTCTGAAGAAAGGGCATGAGAAGAATGGAAAATTAGTGATTTAATTGAAAGCAAAACTTTGAGTCAGCCTGAAAATTATATAAGTTATCAAAATAGTAAAGGAAATACCAGCATTAGATTTATAAATTACAAACCCAGAACCACAGATGACTTAGAAACAGAAGCATCTGATAGAAATATAATAGATAATAGAAGACATAGTGTTTCAGAGTTTATGGAAAAATTAGATCAAGAAAGTGAGATAAAATATTACGAAAATAAATTAAAGGAAATAAATGAAGAATATAATAACTCTATGAAGTGTGACTGGCCTAAAATAAGAGATAAAGAACTTTATTTCTATAGAGAATTAGCTAGAGTAAAGAAAGTAAAGAAGAACGAAGATATGGCAGTAGAAATTTTTAAAAACCAAGAAACCAAGATAGAACAGATAAAGAGGAAAGAGCAAGATAAGCATGACAAAGAAGAGCAAAATCTTGGTAAAATTTTAAGTGAAGAAGAGCAATGGGCAGAGAATGAAAGATTATTTCTTGAAAGTTATGAAGAAGAAATTAATCTAATAAATGA---------------------AATAGACAATGCAGAACAATATAATGATTTTATAAACACATTAGATGAAGTAGGGTTACATAATCTTGATAATGCAATGGAAGCTATGGAAGTGGACTTAGGAACAGGAAAGAGAAAAAGATATGGAGAAGGTACTG

#for S6 Fig. (CP)
>Chr10:9822474-9823465:-1
TGAAAAACGAAGGAGAAAGAGAAAGACCAGCTAGGGCAGCAGGAAAATGGCCCCCTGATAGAGAAGAATTTTCATATAACTATATTCCAGGACAATATAGGCACATGGGTACTAAGAGAAGAGACTTTGAGAAGCCTGTTAAATTTCAAAATAAGAGGAGTGATGGTGCTATATTAAATTTAGCCGCACATGACCCTATTGATTGGCCTAATATTATTAGTATTTGGAAAGGTTTAATAGTTCAAAAATATATACAAAACCAGCACAATATAGGAAGTAAAGTTGAAGATATGATAACCTACTTAGAAACATTTTTAGGAGAATCTGCTAAGGTTCTATGGGAACAATGGGTTGAAAAGAATCCTAATAATTATGAAGAATTGAAAAGAGCTGGTAGCAATCCGCATAATTTTGCAAATGTTATATCTAACATTATTATAGCTGAAGATCCGGAATTAGGTTATACAACTTTGCAGAATGAAAGGTTAAAAGAAATAGAAAAATTAACGTTAACAAGTTGGAAAGGCATAAAAGAATTCTCCCAACATTATTTATATAATGCTACAACTGCTAAACAAGGATATAATAGGGGAACAGTTGAACGTTATTTCAATAAATTACCTGACCCACTAGGAAGTATGATATTTGAAGAATATAAAAAGGAAACTGAAGGAGCTGAAATCAACATCTCGCAAGCCATAACTTTTGTGTTTAAGCAACTAAGAAAAATATGCACGGGTATCCAAGCCCAAAGATCTATGAAACACTCGGATTACAATTTCTGCAATAAAATAGTTCAAATACCCTTGTCATATGGAGAAGACAAGCCTAGAAGTAAAAGGATTTATAAACATCAAAATAGAAACAACAATAATATTAGAATAAAGAAAAGGTATTTCTTAAGAAGATCAGATAATAGAGTACCCTTCTTACATAAAAGAAATGTAAGAAGATATAATCCAAAGAAAACCTATGACAAAACATGCAGATGT
>Chr10:10423992-10424983:1
TGAAAAACGAAGGAGAAAGAGAAAGACCAGCTAGGGCAGCAGGAAAATGGCCCCCTGATAGAGAAGAATTTTCATATAACTATATATCAGGTCAATATAGGCATATGGGTACAAAGAGAAGAGACTTTGAGAAGCCTGTTAAATTTCAAAACCAGAGGAGTGATGGTGCTATATTAAATTTAGCCGCACATGACCCTATTGATTGGCCTAATATTATTAGTATTTGGAAAGGTTTAATAGTTCAAAAATATATACAAAACCAACACAATATAGGAAGTAAAGTTGAAGATATGATAACTTACTTAGAAACATTTTTAGGTGAATCTGCTAAGGTTCTATGGGAACAATGGGTTGAAAAGAATCCTAATAATTATGAAGAATTGAAAAGAGCTGGTAGCAATCCGCATAATTTTGCAAATGTTATATCTAACATTATTATAGCTGAAGATCCGGAATTAGGTTATACAACTTTGCAAAATGAAAGGTTAAAAGAAATAGAAAAATTAACGTTAACAAGTTGGAAAGGCATAAAAGAATTCTCCCAACATTATTTATATAATGCTACAACTGCTAAACAAGGATATAACAGGGGAATAGTTGAACGTTATTTCAATAAATTACCTGACCCACTAGGAAGTATGATATTTGAAGAATATAAAAAGGAAACTGAAGGAGCTGAAATCAACATCTCGCAAGCCATAACTTTTGTGTTTAAGCAACTAAGAAAAATATGCACGGGTATCCAAGCCCAAAGATCTATGAAACACTCGGATTACAATTTCTGCAATAAAATAGTTCAAATACCCTTGTCATATGGAGAAGACAAGCCTAGAAGTAAAAGGATTTATAAACATCAAAATAGAAACAACAATAATATTAGAACAAAGAAAAGGTATTTCTTAAGAAGATCAGATAATAGAGCACCCTTCTTACATAAAAGAAATGTAAGAAGATATAATCCAAAGAAAACCTATGATAAAACATGCAGATGT
>Chr10:14869227-14870218:-1
TAAAAAATGAAGGAGAAAGAGAAAGACCAGCCAGGGCAGCAGGAAGATGGCCTCCAGAAAAAGAAGAATATTCATATCATTATATCCCAGGACAGTATAGGCACATGGGCACTAAAAGAAGAGATTTTGAGAAACCAATAAAATTTCAAAATCAAAAAAGTGATGGGGCTATACTAAATCTAGCAGCACATGATCCCATAGACTGGCCAAATATCATTAGTATTTGGAAGGGGTTAATAGTTCAAAAATACATACAAAATCAGCATAATATAGGGAATAAGGTGGGGGATATGATAACTTATTTAGAAACATTTTTGGGTGAATCTGCTAAAGTCCTATGGGAACAATGGGTTGAAAAGAATCCTAATAACTATGAAGAGCTAAAAAGAGCAGGAAGTAATCCTCACAACTTTGCAAATATAGTATCTAATATTATCATAGCTGAAGACCCAGAATTAGGATATACAACCCTGCAAAATGAAAGATTAAAAGAAATAGAAAAATTAACTTTAACAAGCTGGAAAGGTATAAAGGAATTTTCTCAACATTATCTATATAATGCAACAACTGCTAAGCAAGGATACAATAAGGGAATAGTTGAGCGATATTTTAATAAACTACCTGACCCATTAGGTAGTATGATTTTTGAGGAATATAAAAAGGAAACTGAAGGAGCTGAAATTAATATTTCCCAAGCCATAACCTTCGTGTTCAAACAATTAAGAAAAATATGCACAGGAATACAAGCCCAAAGGTCAATGAAACATTTTGATTATAATTTTTGCAATAAAATAATACAAATACCTTTATCATATGGAGAAGATAGGCCTAGAAATAAAAGAAACCATAGATATCAAAGTAGAAATAGCAATAATATAAAGACAAAGAAAAGGTACTTCTTAAGAAGATCAGATAATAGAGCACCTTTCTTACATAAACGAAATGTAAGAAGATATAACCCAAAGAAAACTTATGATAAGACATGCAGATGT
>Chr10:22435066-22436057:-1
TAAAAAATGAAGGAGAAAGAGAAAGACCAGCCAGGGCAGCAGGAAGATGGCCTCCAGAAAAAGAAGAATATTCATATCATTATATCCCAGGATAGTATAGGCACATGGGCACTAAAAGAAGAGATTTTGAGAAACCAATAAAATTTCAAAATCAAAAAAGTGATGGGGCTATACTAAATCTAGCAGCACATGATCCCATAGACTGGCCAAATATCATTAGTATTTGGAAGGGGTTAATAGTTCAAAAATACATACAAAATCAGCATAATATAGGGAATAAGGTGGAGGATATGATAACTTATTTAGAAACATTTTTGGGTGAATCTGCTAAAGTCCTATGGGAACAATGGGTTGAAAAGAATCCTAATAACTACGAAGAGCTAAAAAGAGCAGGAAGTAATCCTCACAACTTTGCAAATATAGTATCTAATATTATCATAGCTGAAGACCCAGAATTAGGATATACAACCCTGCAAAATGAAAGATTAAAAGAAATAGAAAAATTAACTTTAACAAGCTGGAAAGGTATAAAGGAATTTTCTCAACATTATCTATATAATGCAACAACTGCTAAGCAAGGATACAATAAGGGAATAGTTGAGCGATATTTTAATAAACTACCTGACCCATTAGGTAGTATGATTTTTGAGGAATATAAAAAGGAAACTGAAGGAGCTGAAATTAATATTTCCCAAGCCATAACCTTCGTGTTCAAACAATTAAGAAAAATATGCACAGGAATACAAGCCCAAAGGTCAATGAAACATTCTGATTATAATTTTTGCAATAAAATAATACAAATACCTTTATCATATGGAGAAGATAGGCCTAGAAATAAAAGAAACCATAGATATCAAAGTAGAAATAGCAATAATATAAAGACAAAGAAAAGGTACTTCTTAAGAAGATCAGATAATAGAGCACCTTTCTTACATAAACGAAATGTAAGAAGATATAACCCAAAGAAAACTTATGATAAGACATGCAGATGT
>Chr10:23214014-23215005:-1
TAAAAAATGAAGGAGAAAGAGAAAGACCAGCCAGGGCAGCAGGAAGATGGCCTCCAGAAAAAGAAGAATATTCATATCATTATATCCCAGGACAGTATAGGCACATGGGCACTAAAAGAAGAGATTTTGAGAAACCAATAAAATTTCAAAATCAAAAAAGTGATGGGGCTATACTAAATCTAGCAGCACATGATCCCATAGACTGGCCAAATATCATTAGTATTTGGAAGGGGTTAATAGTTCAAAAATACATACAAAATCAGCATAATATAGGGAATAAGGTGGAGGATATGATAACTTATTTAGAAACATTTTTGGGTGAATCTGCTAAAGTCCTATGGGAACAATGGGTTGAAAAGAATCCTAATAACTATGAAGAGCTAAAAAGAGCAGGAAGTAATCCTCACAACTTTGAAAATATAGTATCTAATATTATCATAGCTGAAGACCCAGAATTAGGATATACAACCCTGCAAAATGAAAGATTAAAAGAAATAGAAAAATTAACTTTAACAAGCTGGAAAGGTATAAAGGAATTTTCTCAACATTATCTATATAATGCAACAACTGCTAAGCAAGGATACAATAAGGGAATAGTTGAGCGATATTTTAATAAACTACCTGACCCATTAGGTAGTATGATTTTTGAGGAATATAAAAAGGAAACTGAAGGAGCTGAAATTAATATTTCCCAAGCCATAACCTTCGTGTTCAAACAATTAAGAAAAATATGCACAGGAATACAAGCCCAAAGGTCAATGAAACATTCTGATTATAATTTTTGCAATAAAATAATACAAATACCTTTATCATATGGAGAAGATAGGCCTAGAAATAAAAGAAACCATAGATATCAAAGTAGAAATAGCAATAATATAAAGACAAAGAAAAGGTACTTCTTAAGAAGATCAGATAATAGAGCACCTTTCTTACATAAACGAAATGTAAGAAGATATAACCCAAAGAAAACTTATGATAAGACATGCAGATGT
>Chr11:9658067-9659058:1
TGAAAAACGAAGGAGAAAGAGAAAGACCAGCTAGGGCAGCAGGAAAATGGCCCCCTGATAGAGAAGAATTTTCATATAACTATATACCAGGTCAATATAGGCATATGGGTACAAAGAGAAGAGACTTTGAGAAGCCTGTTAAATTTCAAAACCAGAGGAGTGATGGTGCTATATTAAATTTAGCCGCACATGACCCTATTGATTGGCCTAATATTATTAGTATTTGGAAATGTTTAATAGTTCAAAAATATATACAAAACCAGCACAATATAGGAAGTAAAGTTGAAGATATGATAACCTACTTAGAAACATTTTTAGGTGAATCTGCTAAGGTTCTATGGGAACAATGGGTTGAAAAGAATCCTAATAATTATGAAGAATTGAAAAGAGCTGGTAGCAATCCGCATAATTTTGCAAATGTTATATCTAACATTATTATAGCTGAAGATCCGGAATTATGTTATACAACTTTGCAAAATGAAAGGTTAAAAGAAATAGAAAAATTAACGTTAACAAGTTGGAAAGGCATAAAAGAATTCTCCCAACATTATTTATATAATGCTACAACTGCTAAACAAGGATATAACAGGGGAATAGTTGAACGTTACTTCAATAAATTACCTGACCCACTAGGAAGTATGATATTTGAAGAATATAAAAAGGAAACTGAAGGAGCTGAAATCAATATCTCTCAAGCCATAACTTTTGTGTTTAAGCAACTAAGAAAAATATGCACGGGTATCCAAGCCCAAAGATCTATGAAACACTCGGATTACAATTTCTGCAATAAAATAGTTCAAATACCCTTGTCATATGGAGAAGACAAGCCTAGAAGTAAAAGGATTTATAAACATCAAAATAGAAACCATAATAATATTAGAACAAAGAAAAGGTATTTCTTAAGAAGATCAGATAATAGAGCACCATTCTTACATAAAAGAAATGTAAGAAGATATAATCCAAAGAAAACCTATGACAAAACATGCAGATGT
>Chr11:9667599-9668591:-1
TAAAAAATGAAGGAGAAAGAGAAAGACCAGCCAGGGCAGCAGGAAGATGGCCTCCAGAAAAAGAAGAATATTCATATCATTATATCCCAGGACAGTATAGGCACATGGGCACTAAAAGAAGAGATTTTGAGAAACCAATAAAATTTCAAAATCAAAAAAGTGATGGGGCTATACTAAATCTAGCAGCACATGATCCCATAGACTGGCCTAATATTATTAGTATTTGGAAAGGTTTAATAGTTCAAAAATATATACAAAACCAGCACAATATAGGAAGTAAAGTTGAAGATATGATAACCTACTTAGAAACATTTTTAGGTGAATCTGCTAAGGTTCTATGGGAACAATGGGTTGAAAAGAATCCTAATAATTATGAAGAATTGAAAAGAGCTGGTAGCAATCCGCATAATTTTGCAAATGTTATATCTAACATTATTATAGCTGAAGATCCGGAATTAGGTTATACAACTTTGCAAAATGAAAGGTTAAAAGAAATAGAAAAATTAACGTTAACAAGTTGGAAAGGCATAAAAGAATTCTCCCAACATTATTTATATAATGCTACAACTGCTAAACAAGGATATAACAGGGGAATAGTTGAACGTTACTTCAATAAATTACCTGACCCACTAGGAAGTATGATATTTGAAGAATATAAAAAGGAAACTGAAGGAGCTGAAATCAATATCTCTCAAGCCATAACTTTTGTGTTTAAGCAACTAAGAAAAATATGCACGGGTATCCAAGCCCAAAGATCTATGAAACACTCGGATTACAATTTCTGCAATAAAATAGTTCAAATACCCTTGTCATATGGAGAAGACAAGCCTAGAAGTAAAAGGATTTATAAACATCAAAATAGAAACCATAATAATATTAGAACAAAGAAAAGGTATTTCTTAAGAAGATCAGATAATAGAGCACCATTCTTACATAAAAGAAATGTAAGAAGATATAATCCAAAGAAAACCTATGACAAAACATGCAGATGT
>Chr11:28352531-28353522:1
TAAAAAATGAAGGAGAAAGAGAAAGACCAGCCAGGGCAGCAGGAAGATGGCCTCCAGAAAAAGAAGAATATTCATATAATTATATCCCAGGACAGTATAGGCACATGGGCACTAAAAGAAGAGATTTTGAGAAACCAATAAAATTTCAAAATCAAAAAAGTGATGGGGCTATACTAAACCTAGCAGCACATGATCCCATAGACTGGCCAAATATCATTAGTATTTGGAAGGGGTTAATAATTCAAAAATATATACAAAATCAGCATAATATAGGGAATAAGGTGGAGGAAATGATAACTTATTTAGAAACATTTTTGGGTGAATCTGCTAAAGTCCTATGGGAACAATGGGTTGAAAAGAATCCTAATAACTACAAAGAGCTAAAAAGAGCAGGAAGTAATCCTCACAACTTTGCAAATATAGTATCTAATATTATCATAGCTGAAGACCCAGAATTAGGATATACAACCCTGCAAAATGAAAGATTAAAAGAAATAGAAAAATTAACATTAACAAGCTGGAAAGGTATAAAGGAATTTTCTCAACATTATCTATATAATGCAACAACTGCTAAGCAAGGATACAATAAGGGAATAGTTGAGCAATATTTTAATAAACTACCTGACCCATTAGGTAGTATGATTTTTGAGGAATATAAAAAGGAAACTGAAGGAGCTGAAATTAATATTTCCCAAGCCATAACTTTCGTGTTCAAACAATTAAGAAAAATATGCACAGGAATACAAGCCCAAAGGTCAATGAAACATTCTGATTATAATTTTTGCAATAAAATAATACAAATACTTTTATCATATGGAGAAGATAGGCCTAGAAATAAAAGAAACCATAGATATCAAAGTAGAAATAACAATAATATAAAGACAAAGAAAAGGTACTTCTTAAGAAGATCAGATAATTGAGCACCTTTCTTACATAAACGAAATGTAAGAAGATATAACCCAAAGAAAACTTATGATAAGACATGCAGATGT
>Chr12:4593237-4594084:1
------------------------------------------------------------------------------------------------------------------------------------------------TTCAAAATCAAAAAAGTGATGGGGCTATACTAAATCTAGCAGCACATGATCCCATAGACTGGCCAAATATCATTAGTATTTGGAAGGGGTTAATAGTTCAAAAATACATACAAAATCAGCATAATATAGGGAATAAGGTGGAGGATATGATAACTTATTTAGAAACATTTTTGGGTGAATCTGCTAAAGTCCTATGGGAACAATGGGTTGAAAAGAATCCTAATAACTACGAAGAGCTAAAAAGAGCAGGAAGTAATCCTCACAACTTTGCAAATATAGTATCTAATATTATCATAGCTGAAGACCCAGAATTAGGATATACAACCCTGCAAAATGAAAGATTAAAAGAAATAGAAAAATTAACTTTAACAAGCTGGAAAGGTATAAAGGAATTTTCTCAACATTATCTATATAATGCAACAACTGCTAAGCAAGGATACAATAAGGGAATAGTTGAGCGATATTTTAATAAACTACCTGACCCATTAGGTAGTATGATTTTTGAGGAATATAAAAAGGAAACTGAAGGAGCTGAAATTAATATTTCCCAAGCCATAACCTTCGTGTTCAAACAATTAAGAAAAATATGCACAGGAATACAAGCCCAAAGGTCAATGAAACATTCTGATTATAATTTTTGCAATAAAATAATACAAATACCTTTATCATATGGAGAAGATAGGCCTAGAAATAAAAGAAACCATAGATATCAAAGTAGAAATAGCAATAATATAAAGACAAAGAAAAGGTACTTCTTAAGAAGATCAGATAATAGAGCACCATTCTTACATAAACGAAATGTAAGAAGATATAACCCAAAGAAAACTTATGATAAGACATGCAGATGT
>Chr12:23144396-23145382:-1
---AAAACGAAGGAGAAAGAGAAAGACCAGCTAGGGCAGCAGGAAAATGGCCCCCTGATAGAGAAGAATTTTCATATAACTATATACCAGGTCAATATAGGCATATGGGTACAAAGAGAAGAGACTTTGAGAAGCCTGTTAAATTTCAAAACCAGAGGAGTGATGGTGCTATATTAAATTTAGCCGCACATGACCCTATTGATTGGCCTAATATTATTAGTATTTGGAAAGGTTTAATAGTTCAAAAATATATACAAAACCAGCACAATATAGGAAGTAAAGTTGAAGATATGATAACCTACTTAGAAACATTCTTAGGTGAATCTGCTAAGGTTCTATGGGAACAATGGGTTGAAAAGAATCCTAATAATTATGAAGAATTGAAAAGAGCTGGTAGCAATCCGCATAATTTTGCAAATGTTATATCTAACATTATTATAGCTGAAGATCCGGAATTAGGTTATACAACTTTGCAAAATGAAAGGTTAAAAGAAATAGAAAAATTAACGTTAACAAGTTGGAAAGGCATAAAAGAATTCTCCCAACATTATTTATATAATGCTACAACTGCTAAACAAGGATATAACAGGGGTATAGTTGAACGTTATTTCAATAAATTACCTGACCCACTAGGAAGTATGATATTTGAAGAATATAAAAAGGAAACTGAAGGAGCTGAAATCAACATCTCTCAAGCCATAACTTTTGTGTTTAAGCAACTAAGAAAAATATGCACGGGTATCCAAGCCCAAAGATCTATGAAACACTCGGATTACAATTTCTGCAATAAAATAGTTCAAATACCCTTGTCATATGGAGAAGACAAGCCTAGAAGTAAAAGGATTTATAAACATCAAAATAGAAACAACAATAATATTAGAACAAAGAAAAGGTATTTCTTAAGAAGATCAGATAATAGAGCACCCTTCTTACATAAAAGAAATGTAAGAAGATATAATCCAAAGAAAACCTATGATAAAACATGCAGAT--
>Chr12:25995917-25996908:1
TAAAAAATGAAGGAGAAAGAGAAAGACCAGCCAGGGCAGCAGGAAGATGGCCTCCAGAAAAAGAAGAATATTCATATCATTATATCCCAGGACAGTATAGGCACATGGGCACTAAAAGAAGAGATTTTGAGAAACCAATAAAATTTCAAAATCAAAAAAGTGATGGGGCTATACTAAATCTAGCAGCACATGATCCCATAGACTGGCCAAATATCATTAGTATTTGGAAGGGGTTAATAGTTCAAAAATACATACAAAATCAGCATAATATAGGGAATAAGGTGGAGGATATGATAACTTATTTAGAAACATTTTTGGGTGAATCTGCTAAAGTCCTATGGGAACAATGGGTTGAAAAGAATCCTAATAACTACGAAGAGCTAAAAAGAGCAGGAAGTAATCCTCACAACTTTGCAAATATAGTATCTAATATTATCATAGCTGAAGACCCAGAATTAGGATATACAACCCTGCAAAATGAAAGATTAAAAGAAATAGAAAAATTAACTTTAACAAGCTGGAAAGGTATAAAGGAATTTTGTCAACATTATCTATATAATGCAACAACTGTTAAGCAAGGATACAATAAGGGAATAGTTGAGCGATATTTTAATAAACTACCTGACCCATTAGGTAGTATGATTTTTGAGGAATATAAAAAGGAAACTGAAGGAGCTGAAATTAATATTTCCCAAGCCATAACCTTCGTGTTCAAACAATTAAGAAAAATATGCACAGGAATACAAGCCCAAAGGTCAATGAAACATTCTGATTATAATTTTTGCAATAAAATAATACAAATACCTTTATCATATGGAGAAGATAGGCCTAGAAATAAAAGAAACCATAGATATCAAAGTAGAAATAGCAATAATATAAAGACAAAGAAAAGGTACTTCTTAAGAAGATCAGATAATAGAGCACCTTTCTTACATAAACGAAATGTAAGAAGATATAACCCAAAGAAAACTTATGATAAGACATGCAGATGT
>Chr01:758618-759609:-1
TGAAAAACGAAGGAGAAAGAGAAAGACCAGCTAGGGCAGCAGGAAAATGGCCCCCTGATAGAGAAGAATTTTCGTATAACTATATACCAGGTCAATATAGGCACATGGGTACTAAGAGAAGAGACTTTGAGAAGCCTGTTAAATTTCAAAACCAGAGGAGTGATGGTGCTATATTAAATTTAGCCGCACATGACCCTATTGATTGGCCTAATATTATTAGTATTTGGAAATGTTTAATAGTTCAAAAATATATACAAAACCAGCACAATATAGGAAGTAAAGTTGAAGATATGATAACCTACTTAGAAACATTTTTAGGTGAATCTGCTAAGGTTCTATGGGAACAATGGGTTGAAAAGAATCCTAATAATTATGAAGAATTGAAAAGAGCTGGTAGCAATCCGCATAATTTTGCAAATGTTATATCTAACATTATTATAGCTGAAGATCCGGAATTAGGTTATACAACTTTGCAAAATGAAAGGTTAAAAGAAATAGAAAAATTAACGTTAACAAGTTGGAAAGGCATAAAAGAATTCTCCCAACATTATTTATATAATGCTACAACTGCTAAACAAGGATATAACAGGGGTATAGTTGAACGTTATTTCAATAAATTACCTGACCCACTAGGAAGTATGATATTTGAAGAATATAAAAAGGAAACTGAAGGAGCTGAAATCAACATCTCTCAAGCCATAACTTTTGTGTTTAAGCAACTAAGAAAAATATGCACGGGTATCCAAGCCCAAAGATCTATGAAACACTCGGATTACAATTTCTGCAATAAAATAGTTCAAATACCCTTGTCATATGGAGAAGACAAGCCTAGAAGTAAAAGAATTTATAAACATCAAAATAGAAACCATAATAATATTAGAACGAAGAAAAGGTATTTCTTAAGAAGATCAGATAATAGAGCACCCTTCTTACATAAAAGAAATGTAAGAAGATATAATCCAAAGAAAACCTATGACAAAACATGCAGATGT
>Chr01:11696206-11697061:-1
----------------------------------------------------------------------------------------------------------------------------------------TGTTAAATTTCAAAACCAGAGGAGTGATGGTGCTATATTAAATTTAGCCGCACATGACCCTATTGATTGGCCTAATATTATTAGTATTTGGAAAGGTTTAATAGTTCAAAAATATATAAAAAACCAGCACAATATAGGAAGTAAAGTTGAAGATATGATAACCTACTTAGAAACATTCTTAGGTGAATCTGCTAAGGTTCTATGGGAACAATGGGTTGAAAAGAATCCTAATAATTATGAAGAATTGAAAAGAGCTGGTAGCAATCCGCATAATTTTGCAAATGTTATATCTAACATTATTATAGCTGAAGATCCGGAATTAGGTTATACAACTTTGCAAAATGAAAGGTTAAAAGAAATAGAAAAATTAACGTTAATAAGTTGGAAAGGCATAAAAGAATTCTCCCAACATTATTTATATAATGCTACAACTGCTAAACAAGGATATAACAGGGGTATAGTTGAACGTTATTTCAATAAATTACCTGACCCACTAGGAAGTATGATATTTGAAGAATATAAAAAGGAAACTGAAGGAGCTGAAATCAACATCTCTCAAGCCATAACTTTTGTGTTTAAGCAACTAAGAAAAATATGCACGGGTATCCAAACCCAAAGATCTATGAAACACTCGGATTACAATTTCTGCAATAAAATAGTTCAAATACCCTTGTCATATGGAGAAGACAAGCCTAGAAGTAAAAGGATTTATAAACATCAAAATAGAAACAACAATAATATTAGAACAAAGAAAATGTATTTCTTAAGAAGATCAGATAATAGAGCACCCTTCTTACATAAAAGAAATGTAAGAAGATATAATCCAAAGAAAACCTATGACAAAACATGCAGATGT
>Chr02:8816560-8817551:1
TAAAAAATGAAGGAGAAAGAGAAAGACCAGCCAGGGCAGCAGGAAGATGGCCTCCAGAAAAAGAAGAATATTCATATCATTATATCCCAGGACAGTATAGGCACATGGGCACTAAAAGAAGAGATTTTGAGAAACCAATAAAATTTCAAAATCAAAAAAGTGATGGGGCTATACTAAATCTAGCAGCACATGATCCCATAGACTGGCCAAATATCATTAGTATTTGGAAGGGGTTAATAGTTCAAAAATACATACAAAATCAGCATAATATAGGGAATAAGGTGGAGGATATGATAACTTATTTAGAAACATTTTTGGGTGAATCTGCTAAAGTCCTATGGGAACAATGGGTTGAAAAGAATCCTAATAACTATGAAGAGCTAAAAAGAGCAGGAAGTAATCCTCACAACTTTGCAAATATAGTATCTAATATTATCATAGCTGAAGACCCAGAATTAGGATATATAACCCTGCAAAATGAAAGATTAAAAGAAATAGAAAAATTAACTTTAACAAGCTGGAAAGGTATAAAGGAATTTTCTCAACATTATCTATATAATGCAACAACTGCTAAGCAAGGATACAATAAGGGAATAGTTGAGCGATATTTTAATAAACTACCTGACCCATTAGGTAGTATGATTTTTGAGGAATATAAAAAGGAAACTGAAGGAGCTGAAATTAATATTTCCCAAGCCATAACCTTCGTGTTCAAACAATTAAGAAAAATATGCACAGGAATACAAGCCCAAAGGTCAATGAAACATTCTGATTATAATTTTTGCAATAAAATAATACAAATACCTTTATCATATGGAGAAGATAGGCCTAGAAATAAAAGAAACCATAGATATCAAAGTAGAAATAGCAATAATATAAAGACAAAGAAAAGGTACTTCTTAAGAAGATCAGATAATAGAGCACCTTTCTTACATAAACGAAATGTAAGAAGATATAACCCAAAGAAAACTTATGATAAGACATGCAGATGT
>Chr02:9120545-9121536:1
TGAAAAACGAAGGAGAAAGAGAAAGACCAGCTAGGGCAGCAGGAAAATGGCCCCCTGATAGAGAAGAATTTTCATATAACTATATACCAGGTCAATATAGGCATATGGGTACAAAGAGAAGAGACTTTGAGAAGCCTGTTAAATTTCAAAACCAGAGGAGTGATGGTGCTATATTAAATTTAGCCGCACATGACCCTATTGATTGGCCTAATATTATTAGTATTTGGAAAGGTTTAATAGTTCAAAAATATATACAAAACCAGCACAATATAGGAAGTAAAGTTGAAGATATGATAACCTACTTAGAAACATTTTTAGGTGAATCTGCTAAGGTTCTATGGGAACAATGGGTTGAAAAGAATCCTAATAATTATGAAGAATTGAAAAGAGCTGGTAGCAATCCGCATAATTTTGCAAATGTTATATCTAACATTATTATAGCTGAAGATCCGGAATTAGGTTATACAACTTTGCAAAATGAAAGGTTAAAAGAAATAGAAAAATTAACGTTAACAAGTTGGAAAGGCATAAAAGAATTCTCCCAACATTATTTATATAATGCTACAACTGCTAAACAAGGATATAACAGGGGTATAGTTGAACGTTATTTCAATAAATTACCTAACCCACTAGGAAGTATGATATTTGAAGAATATAAAAAGGAAACTGAAGGAGCTGAAATCAACATCTCTCAAGCCATAACTTTTGTGTTTAAGCAACTAAGAAAAATATGCACGGGTATCCAAGCCCAAAGATCTATGAAACACTCGGATTACAATTTCTGCAATAAAATAGTTCAAATACCCTTGTCATATGGAGAAGACAAGCCTAGAAGTAAAAAGATTTATAAACATCAAAATAGAAACAACAATAATATTAGAACAAAGAAAAGGTATTTCTTAAGAAGATCAGATAATAGAGCACCCTTCTTACATAAAAGAAATGTAAGAAGATATAATCCAAAGAAAACCTATGACAAAACATGCAGATGT
>Chr02:9126679-9127670:-1
TGAAAAACGAAGGAGAAAGAGAAAGACCAGCTAGGGCAGCAGGAAAATGGCCCCCTGATAGAGAAGAATTTTCATATAACTATATACCAGGTCAATATAGGCATATGGGTACAAAGAGAAGAGACTTTGAGAAGCCTGTTAAATTTCAAAACCAGAGGAGTGATGGTGCTATATTAAATTTAGCCGCACATGACCCTATTGATTGGCCTAATATTATTAGTATTTGGAAAGGTTTAATAGTTCAAAAATATATACAAAACCAGCACAATATAGGAAGTAAAGTTGAAGATATGATAACCTACTTAGAAACATTTTTAGGTGAATCTGCTAAGGTTCTATGGGAACAATGGGTTGAAAAGAATCCTAATAATTATGAAGAATTGAAAAGAGCTGGTAGCAATCCGCATAATTTTGCAAATGTTATATCTAACATTATTATAGCTGAAGATCCGGAATTAGGTTATACAACTTTGCAAAATGAAAGGTTAAAAGAAATAGAAAAATTAACGTTAACAAGTTGGAAAGGCATAAAAGAATTCTCCCAACATTATTTATATAATGCTACAACTGCTAAACAAGGATATAACAGGGGTATAGTTGAACGTTATTTCAATAAATTACCTAACCCACTAGGAAGTATGATATTTGAAGAATATAAAAAGGAAACTGAAGGAGCTGAAATCAACATCTCTCAAGCCATAACTTTTGTGTTTAAGCAACTAAGAAAAATATGCACGGGTATCCAAGCCCAAAGATCTATGAAACACTCGGATTACAATTTCTGCAATAAAATAGTTCAAATACCCTTGTCATATGGAGAAGACAAGCCTAGAAGTAAAAAGATTTATAAACATCAAAATAGAAACAACAATAATATTAGAACAAAGAAAAGGTATTTCTTAAGAAGATCAGATAATAGAGCACCCTTCTTACATAAAAGAAATGTAAGAAGATATAATCCAAAGAAAACCTATGACAAAACATGCAGATGT
>Chr04:9826888-9827879:-1
TGAAAAACGAAGGGGAAAGAGAAAGACCAGCTAGGGCAGCAGGAAAATGGCCCCCTGATAGAGAAGAATTTTCGTATAACTATATACCAGGTCAATATAGGCACATGGGTACTAAGAGAAGAGACTTTGAAAAGCCTGTTAAATTTCAAAACCAGAGGAGTGATGGTGCTATATTAAATTTAGCCGCACATGACCCTATTGATTGGCCTAATATTATTAGTATTTGGAAAGGATTAATAGTCCAAAAATACATACAAAACCAACACAATATAGGAAGTAAAGTTGAAGATATGATAACCTACTTAGAAACATTTTTAGGTGAATCTGCTAAGGTTCTATGGGAACAATGGGTTGAAAAGAATCCTAATAATTATGAAGAATTGAAAAGAGCTGGAAGCAATCTGCATAATTTTGCAAATGTTATATCTAACATTATTATAGCTGAAGATCCGGAATTAGGTTATACAACTTTGCAAAATGAAAGGTTAAAAGAAATAGAAAAATTAACGTTAACAAGTTGGAAAGGCATAAAAGAATTCTCCCAACATTATTTATATAATGCTACAACTGCTAAACAAGGATATAACAGGGGAATAGTTGAACGTTACTTCAATAAATTACCTGACCCACTAGGAAGTATGATATTTGAAGAATATAAAAAGGAAACTGAAGGAGCTGAAATCAATATCTCTCAAGCCATAACTTTTGTGTTTAAGCAACTAAGAAAAATATGCACGGGTATCCAAGCCCAAAGATCTATGAAACACTCGGATTACAATTTCTGCAATAAAATAGTTCAAATACCCTTGTCATATGGAGAAGACAAGCCTAGAAGTAAAAGGATTTATAAACATCAAAATAGAAACAACAATAATATTAGAACAAAGAAAAGGTATTTCTTAAGAAGACCAGGTAATAGAGCACCCTTCTTACATAAAAGAAATGTAAGAAGATATAATCCAAAGAAAACCTATGACAAAACATGCAGATGT
>Chr04:18576985-18577976:1
TAAAAAATGAAGGAGAAAGAGAAAGACCAGCCAGGGCAGCAGGAAGATGGCCTCCAGAAAAAGAAGAATATTCATATAATTATATCCCAGGACAGTATAGGCACATGGGCACTAAAAGAAGAGATTTTGAGAAACCAATAAAATTTCAAAATCAAAAAAGTGATGGGGCTATACTAAACCTAGCAGCACATGATCCCATAGACTGGCCAAATATCATTAGTATTTGGAAGGGGTTAATAGTTCAAAAATATATACAAAATCAGCATAATATAGGGAATAAGGTGGAGGATATGATAACTAATTTAGAAACATTTTTGGGTGAATCTGCTAAAGTCCTATGGGAACAATGGGTTGAAAAGAATCCTAATAACTACGAAGAGCTAAAAAGAGCAGGAAGTAATCCTCACAACTTTGCAAATATAGTATCTAATATTATCATAGCTGAAGACCTAGAATTAGGATATACAACCCTGCAAAATGAAAGATTAAAAGAAATAGAAAAACTAACATTAACAAGCTGGAAAGGTATAAAGGAATTTTCACAACATTATCTATATAATGCAACAACTGCTAAGCAAGGATACAATAAGGGAATAGTTGAGCGATATTTTAATAAACTACCTGACCCATTAGGAAGTATGATTTTTGAGGAATATAAAAAGGAAACTGAAGGAGCTGAAATTAATATTTCCCAAGCCATAACTTTCGTGTTCAAACAGTTAAGAAAAATATGCACAGGAATACAAGCCCAAAGGTCAATGAAACATTCTGATTATAATTTTTGCAATAAAAAAATACAAATACCTTTATCATATGGAGAAGAAAGGCCTAGAAATAAAAGAAACCATAGATATCAAAGAAGAAATAACAATAATATAAAGACAAAGAATAGGTACTTCTTAAGAAGATCAGATAATATAGCACCTTTCTTACATAAACGAAATGTAAGAAGATATAACCCAAAGAAAACTTATGATAAGACATGCAGATGT
>Chr04:20897211-20898202:1
TGAAAAACGAAGGAGAAAGAGAAAGACCAGCTAGGGCAGCAGGAAAATGGCCCCCTGATAGAGAAGAATTTTCATATAACTATATACCAGGACAATATAGGCACATGGGTACTAAGAGAAGAGACTTTGAGAAGCCTGTTAAATTTCAAAACCAGAGGAGTGATAGTGCTATATTAAATTTAGCCGCACATGACCCTATTGATTGGCCTAATATTATTAGTATTTGGAAAGGTTTAATAGTTCAAAAATATATACAAAACCAGCACAATATAGGAAGTAAAGTTGAAGATATGATAACCTACTTAGAAATATTTTTAGGTGAATCTGCTAAGGTTCTATGGGAACAATGGGTTGAAAAGAATCCTAATAATTATGAAGAATTGAAAAGAGCTGGTAGCAATCCGCATAATTTTGCAAATGTTATATCTAACATTATTATAGCTGAAGATCAGGAATTAGGTTATACAACTTTGCAGAATGAAAGGTTAAAAGAAATAGAAAAATTAACGTTAACAAGTTGGAAAGGCATAAAAGAATTCTCCCAACATTATTTATATAATGCTACAACTGCTAAACAAGGATATAACAGGGGAATAGTTGAACGTTATTTCAATAAATTACCTGACCCACTGGGAAGTATAATATTTGAAGAATATAAAAAGGAAACTGAAGAAGCTGAAATCAACATCTCGCAAGCCATAACTTTTGTGTTTAAGCAACTAAGAAAAATATGCACGGGTATCCAAGCCCAAAGATCTATGAAACACTCGGATTACAATTTCTGCAATAAAATAGTTCAAATACCCTTGTCATATGGAGAAGACAAGCATAGAAGTAAAAGGATTTATAAACATCAAAATAGAAACAACAATAATATTAGAACAAAGAAAAGGTATTTCTTAAGAAGATCAGATAATAGAGCACCCTTCTTACATAAAAGAAATGTAAGAAGATATAATCCAAAGAAAACCTATGACAAAACATGCAGATGT
>Chr05:18274641-18275632:1
TGAAAAACGAAGGAGAAAGAGAAAGACCAGCTAGGGCAGCAGGAAAATGGCCCCCTGATAGAGAAGAATTTTCATATAACTATATACCAGGACAATATAGGCACATGGGTACTAAGAGAAGAGACTTTGAGAAGCCTGTTAAATTTCAAAACCAGAGGAGTGATGGTGCTATATTAAATTTAGCCGCACATGACCCTATTGATTGGCCTAATATTATTAGTATTTGGAAAGGTTTAATAGTTCAAAAATATATACAAAACCAGCACAATATAGGAAGTAAAGTTGAAGATATGATAACCTACATAGAAACATTTTTAGGTGAATCTGCTAAGGTTCTATGGGAACAATGGGTTGAAAAGAATCCTAATAATTATGAAGAATTGAAAAGAGCTGGTAGCAATTCGCATAATTTTGCAAATGTTATATCTAACATTATTATAGCTGAAGATCCGGAATTAGGTTATACAACTTTGCAGAATGAAAGGTTAAAAGAAATAGAAAAATTAACGTTAACAAGTTGGAAAGGCATAAAAGAATTCTCCCAACATTATTTATATAATGCTACAACTGCTAAACAAGGATATAACAGGGGAATAGTTGAACGTTATTTCAATAAATTACCTGACCCACTAGGAAGTATGATATTTGAAGAATATAAAAAGGAAACTGAAGGAGCTGAAATCAACATCTCGCAAGCCATAACTTTTGTGTTTAAGCAACTAAGAAAAATATGCACGGGTATCCAAGCCCAAAGATCTATGAAACACTCGGATTACAATTTCTGCAATAAAATAGTTCAAATACCCTTGTCATATGGAGAAGACAAGCCTAGAAGTAAAATAATTTATAAACATCAAAATAGAAACAACAATAATATTAGAACAAAGAAAAGGTATTTCTTAAGAAGATCAGATAATAGAGCACCCTTCTTACATAAAAGAAATGTAAGAAGATATAATCCAAAGAAAACCTATGATAAAACATGCAGATGT
>Chr05:18280295-18281286:-1
TGAAAAACGAAGGAGAAAGAGAAAGACCAGCTAGGGCAGCAGGAAAATGGCCCCCTGATAAAGAAGAATTTTCATATAACTATATACCAGGACAATATAGGCACATGGGTACTAAGAGAAGAGACTTTGAGAAGCCTGTTAAATTTCAAAACCAGAGGAGTGATGGTGCTATATTAAATTTAGCCGCACATGACCCTATTGATTGGCCTAATATTATTAGTATTTGGAAAGGTTTAATAGTTCAAAAATATATACAAAACCAGCACAATATAGGAAGTAAAGTTGAAGATATGATAATCTACTTAGAAACATTTTTAGGTGAATCTGCTAAGGTTCTATGGGAACAATGGGTTGAAAAGAATCCTAATAATTATGAAGAATTGAAAAGAGCTGGTAGCAATCCGCATAATTTTGCAAATGTTATATCTAACATTATTATAGCTGAAGATCCGGAATTAGGTTATACAACTTTGCAGAATGAAAGGTTAAAAGAAATAGAAAAATTAACGTTAACAAGTTAGAAAGGCATAAAAGAATTCTCCCAACATTATTTATATAATGCTACAACTGCTAAACAAGGATATAACAGGGGAATAGTTGAACATTATTTCAATAAATTACCTGACCCACTAGGAAGTATGATATTTGAAGAATATAAAAAGGAAACTGAAGGAGCTGAAATCAACATCTCGCAAGCCATAACTTTTGTGTTTAAGCAACTAAGAAAAATATGCACGGGTATCCAAGCCCAAAGATCTATGAAACACTCGGATTGCAATTTCTGTAATAAAATAGTTCAAATACCCTTGTCATATGGAGAAGACAAGCCTAGAAGTAAAAGGATTTATAAACATCAAAATAGAAACAACAATAATATTAGAACAAAGAAAAGGTATTTCTTAAGAAGATCAGATAATAGAGCACCCTTCTTACATAAAAGAAATGTAAGAAGATATAATCCAAAGAAAACCTATGACAAAACATGCAGATGT
>Chr05:19060857-19061848:-1
TGAAAAACGAAGGAGAAAGAGAAAGACCAGCTAGGGCAGCAGGAAAATGGCCCCCTGATAGAGAAGAATTTTCATATAACTATATACCAGGACAATATAGGCACATGGGTACTAAGAGAAGAGACTTTGAGAAGCCTGTTAAATTTCAAAACCAGAGGAGTGATGGTGCTATATTAAATTTAGCCGCACATGACCCTATTGATTGGCCTAATATTATTAGTATTTGGAAAGGTTTAATAGTTCAAAAATATATACAAAACCAGCACAATATAGGAAGTAAAGTTGAAGATATGATAACCTACTTAGAAACATTTTTAGGTGAATCTGCTAAGGTTCTATGGGAACAATGGGTTGAAAAGAATCCTAATAATTATGAAGAATTGAAAAGAGCTGGTAGCAATCCGCATAATTTTGCAAATGTTATATCTAACATTATTATAGCTGAAGATCCGGAATTAGGTTATACAACTTTGCAGAATGAAAGGTTAAAAGAAATAGAAAAATTAACGTTAACAAGTTGGAAAGGCATAAAAGAATTCTCCCAACATTATTTATATAATGCTATAACTGCTAAACAAGGATATAACAGGGGAATAGTTGAACGTTATTTCAATAAATTACCTGACCCACTAGGAAGTATGATATTTGAAGAATATAAAAAGGAAATTGAAGGAGCTGAAATCAACATCTCGCAAGCCATAACTTTTGTGTTTAAGCAACTAAGAAAAATATGCACGGGTATCCAAGCCCAAAGATCTATGAAACACTCGGATTACAATTTCTGCAATAAAATAGTTCAAATACCCTTGTCATATGGAGAAGACAAGCCTAGAAGTAAAAGGATTTATAAACATCAAAATAGAAACAACAATAATATTAGAACAAAGAAAAGGTATTTCTTAAGAAGATCAGATAATAGAGCACCCTTCTTACATAAAAGAAATGTAAGAAGATATAATCCAAAGAAAACCTATGACAAAACATGCAGATGT
>Chr06:1710097-1711088:-1
TGAAAAACGAAGGAGAAAGAGAAAGACCAGCTAGGGCAGCAGGAAAATGGCCCCCTGATAGAGAAGAATTTTCATATAACTATATACCAGGACAATATAGGCACATGGGTACTAAGAGAAGAGACTTTGAGAAGCCTGTTAAATTTCAAAACCAGAGGAGTGATGGTGCTATATTAAATTTAGCCGCACATGACCCTATTGATTGGCCTAATATTATTAGTATTTGGAAAGGTTTAATAGTTCAAAAATATATACAAAACCAGCACAATATAGGAAGTAAAGTTGAAGATATGATAACCTACTTAGAAACATTTTTAGGTGAATCTGCTAAGGTTCTATGGGAACAATGGGTTGAAAAGAATCCTAATAATTATGAAGAATTGAAAAGAGCTGGTAGCAATCCGCATAATTTTGCAAATGTTATATCTAACATTATTATAGCTGAAGATCCGGAATTAGGTTATACAACTTTGCAGAATGAAAGGTTAAAAGAAATAGAAAAATTAACGTTAACAAGTTGGAAAGGCATAAAAGAATTCTCCCAACATTATTTATATAATGCTACAACTGCTAAACAAGGATATAACAGGGGAATAGTTGAACGTTATTTCAATAAATTACCTGACCCACTAGGAAGTATGATATTTGAAGAATATAAAAAGGAAACTGAAGGAGCTGAAATCAACATCTCGCAAGCCATAACTTTTGTGTTTAAGCAACTAAGAAAAATATGCACGGGTATCCAAGCCCAAAGATCTATGAAACACTCGGATTACAATTTCTGCAATAAAATAGTTCAAATACCCTTGTCATATGGAGAAGACAAGCCTAGAAGTAAAAGGATTTATAAACATCAAAATAGAAACAACAATAATATTAGAACAAAGAAAAGGTATTTCTTAAGAAGATCCGATAATAGAGCACCCTTCTTACATAAAAGAAATGTAAGAAGATATAATCCAAAGAAAATCTATGACAAAACATGCAGATGT
>Chr06:10575712-10576703:1
TAAAAAATGAAGGAGAAAGAGAAAGACCAGCCAGGGCAGCAGGAAGATGGCCCCCAGAAAAAGAAGAATATTCATATCATTATATCCCAGGACAGTATAGGCATATGGGCACTAAAAGAAGAGATTTTGAGAAACCAATAAAATTTCAAAATCAAAAAAGTGATGGGGCTATACTAAATCTAGCAGCACATGATCCCATAGACTGGCCAAATATCATTAGTATTTGGAAGGGGTTAATAGTTCAAAAATACATACAAAATCAGCATAATATAGGGAATAAGGTGGAGGATATGATAACTTATTTAGAAACATTTTTGGGTGAATCTGCTAAAGTCCTATGGGAACAATGGGTTGAAAAGAATCCTAATAACTACGAAGAGCTAAAAAGAGCAGGAAGTAATCCTCACAACTTTGCAAATATAGTATCTAATATTATCATAGCTGAAGACCCAGAATTAGGATATACAACCCTGCAAAATGAAAGATTAAAAGAAATAGAAAAATTAACTTTAACAAGCTGGAAAGGTATAAAGGAATTTTCTCAACATTATCTATATAATGCAACAACTGCTAAGCAAGGATACAATAAGGGAATAGTTGAGCGATATTTTAATAAACTACCTGACCCATTAGGTAGTATGATTTTTGAGGAATATAAAAAGGAAACTGAAGGAGCTGAAATTAATATTTCCCAAGCCATAACCTTCGTGTTCAAACAATTAAGAAAAATATGCACAGGAATACAAGCCCAAAGGTCAATGAAACATTCTGATTATAATTTTTGCAATAAAATAATACAAATACCTTTATCATATGGAGAAGATAGGCCTAGAAATAAAAGAAACCATAGATATCAAAGTAGAAATAGCAATAATATAAAGACAAAGAAAAGGTACTTCTTAAGAAGATCAGATAATAGAGCACCATTCTTACATAAACGAAATGTAAGAAGATATAACCCAAAGAAAACTTATGATAAGACATGCAGATGT
>Chr06:12692650-12693642:1
TACAAAATGAAGGAGAAAGAAAAAGACCAGCCAGGGCAGCAGGAAGATGGCCTCCAGAAAAAGAAGAATATTCATATCATTATATCCCAGGACAGTATAGGCACATGGGTACTAAAAGAAGAGATTTTGAGAAATCAATAAAATTTCAAAATCAAAAAAGTGATGGGGCTATACTAAATCTAGCAGCACATGATCCCATAGACTGGCCAAATATCATTAGTTTTTGGAAGGGGTTAATAGTTCAAAAATATATACAAAATCAGCATAATATAGGGAATAATGTGGGGGATATGATAACTTATTTAGAAACATTTTTGGGTGAATCTGCTAAAGTCCTATGGGAACAATGGGTTGAAAAGAATCCTAATAACTACGAAGAGCTAAAAAGAGCAGGAAGTAATCCTCACAACTTTGCAAATATAGTATCTAATATTATCATAGCTGAAGACCCAGAATTAGGATATACAACCCTGCAAAATGAAAGATTAAAAGAAATAGAAAAATTAACCTTAACAAGCTAGAAAGGTATAAAGGAATTTTCTCAACATTATCTATATAATGCAACAACTGATAAGCAAGGATACAATAAGGGAATAGTTGAGCGATATTTTAATAAACTACCTGACCCATTAGGTAGTATGATTTTTGAGGAATATAAAAAGGAAACTGAAGGAGCTGAAATTAATATTTCCCAAGCCATAACCTTTGTGTTCAAACAATTAAGAAAAATATGCACAGGAATACAAGCCCAAAGGTCAATGAAACATTCTGATTATAATTTTTGCAATAAAATAATACAAATACCTTTATCATATGGAGAAGATAGGCCTAGAAATAAAAGAAACCATAGATATCAAAGTAGAAATAACAATAATATAAAGACAAAGAAAAGGTACTTCTTAAGAAGATCAGATAATAGAGCACCTTTCTTACATAAATGAAATGTAAGAAGATATAACCCAAAGAAAACTTATGATAAGACATGCAGATGT
>Chr06:31865971-31866844:1
TGAAAAACGAAGGAGAAAGAGAAAGACCAGCTAGGGCAGCAGGAAAATGCCCCCCTGATAGAGAAGAATTTTCATATAACTATATACCAGGACAATATAGGCACATGGGTACTAAGAGAAGAGACTTTGAGAAGCCTGTTAAATTTCAAAACCAGAGGAGTGATGGTGCTATATTAAATTTAGCCGCACATGACCCTATTGATTGGCCTAATATTATTAATATTTGGAAATGTTTAATAGTTCAAAAATATATACAAAACCAGCACAATATAGGAAGTAAAGTTGAAGATATGATAACCTACTTAGAAACATTTTTAGGTGAATCTGCTAAGGTTCTATGGGAACAATTGGTTGAAAAGAATCCTAATAATTATGAAGAATTGAAAAGAGCTGGTAGCAATCCGCATAATTTTGCAAATGTTATATCTAACATTATTATAGCTGAAGATCCGGAATTAGGTTATACAACTTTGTAGAATGAAAGATTAAAAGAAATAGAAAAATTAACGTTAACAAGTTGGAAAGGCATAAAAGAATTCTCCCAACATTATTTATATAATGCTACAACTGCTAAACAAGGATATAACAGGGGAATAGTTGAACGTTATTTCAATAAATTACCTGACCCACTAGGAAGTATGATATTTGAAGAATATAAAAAGGAAACTGAAGGAGCTGAAATCAACATCTCGCAAGCCATAACTTTTGTGTTTAAGCAACTAAGAAAAATATGCACGGGTATCCAAGTCTAAAGATCTATGAAACACTCGGATTACAATTTCTGCAATAAAATAGTTCAAATACCCTTGTCATATGGAGAAGACAAGCCTAGAAGTAAAATGATTTATAAACATCAAAATAGAAACAACAACAA----------------------------------------------------------------------------------------------------------------------
>Chr07:2816860-2817851:1
TGAAAAACGAAGGAGAAAGAGAAAGACCAGCTAGGGCAGCAGGAAAATGGCCCCCTGATAGAGAAGAATTTTCGTATAACTATATACCAGGTCAATATAGGCACATGGGTACTAAGAGAAGAGACTTTGAAAAGCCTGTTAAATTTCAAAACCAGAGGAGTGATGGTGCTATATTAAATTTAGCCGCACATGACCCTATTGATTGGCCTAATATTATTAGTATTTGGAAAGGATTAATAGTCCAAAAATACATACAAAACCAACACAATATAGGAAGTAAAGTTGAAGATATGATAACCTACTTAGAAACATTTTTAGGTGAATATGCTAAGGTTCTATGGGAACAATGGGTTGAAAAGAATCCTAATAATTATGAAGAATTGAAAAGAGCTGGTAGTAATCCGCATAATTTTGCAAATGTTATATCTAACATTATTATAGCTGAAGATCCGGAATTAGGTTATACAACTTTGCAAAATGAAAGGTTAAAAGAGATAGAAAATTTAACGTTAACAAGTTGGAAAGGCATAAAAGAATTCTCCCAACATTATTTATATAATGCTACAACTGCTAAACAAGGATATAACAGGGGAATAGTTGAACGTTACTTCAATAAATTACCTGACCCACTAGGAAGTATGATATTTGAAGAATATAAAAAGGAAACTGAAGGAGCTGAAATCAACATCTCTCAAGCCATAACTTTTGTGTTTAAGCAACTAAGAAAAATATGCACGGGTATCCAAGCCCAAAGATCTATGAAACACTCGGATTACAATTTCTGCAATAAAATAGTTTAAATACCCTTGTCATATGGAGAAGACAAGCCTAGAAGTAAAAGAATTTATAAACATCAAAATAGAAACCATAATAATATTAGAACAAAGAAAAGGTATTTCTTAAGAAGATCAGATAATAGAGCACCCTTCTTACATAAAAGAAATGTAAGAAGATATAATCCAAAGAAAACCTATGACAAAACATGCAGATGT
>Chr07:6685837-6686828:-1
TGAAAAACGAAGGAGAAAGAGAAAGACCAGCTAGGGCAGCAGGAAAATGGCCCCCTGATAGAGAAGAATTTTCATATAACTATATACCAGGTCAATATAGGCATATGGGTACAAAGAGAAGAGACTTTGAGAAGCCTGTTAAATTTCAAAACCAGAGGAGTGATGGTGCTATATTAAATTTAGCCGCACATGACCCTATTGATTGGCCTAATATTATTAGTATTTGGAAAGGTTTAATAGTTCAAAAATATATACAAAACCAGCACAATATAGGAAGTAAAGTTGAAGATATGATAACCTACTTAGAAACATTCTTAGGTGAATCTGCTAAGGTTCTATGGGAACAATGGGTTGAAAAGAATCCTAATAATTATGAAGAATTGAAAAGAGCTGGTAGCAATCCGCATAATTTTGCAAATGTTATATCTAACATTATTATAGCTGAAGATCCGGAATTAGGTTATACAACTTTGCAAAATGAAAGGTTAAAAGAAATAGAAAAATTAACATTAACAAGTTGGAAAGGCATAAAAGAATTCTCCCAACATTATTTATATAATGCTACAACTGCTAAACAAGGATATAACAGGGGTATAGTTGAACGTTATTTCAATAAATTACCTGACCCACTAGGAAGTATGATATTTGAAGAATATAAAAAGGAAACTGAAGGAGCTGAAATCAACATCTCGCAAGCCATAACTTTTGTGTTTAAGCAACTAAGAAAAATATGCACGGGTATCCAAGCCCAAAGATCTATGAAACACTCGGATTACAATTTCTGCAATAAAATAGTTCAAATACCCTTGTCATATGGAGAAGACAAGCCTAGAAGTAAAAGGATTTATAAACATCAAAATAGAAACAACAATAATATTAGAACAAAGAAAAGGTATTTCTTAAGAAGATCAGATAATAGAGCACCCTTCTTACATAAAAGAAATGTAAGAAGATATAATCCAAAGAAAACCTATGATAAAACATGTAGATGT
>Chr07:18555962-18556953:-1
TAAAAAATGAAGGAGAAAGAGAAAGACCAGCCAGGGCAGCAGGAAGATGGCCTCCAGAAAAAGAAGAATATTCATATCATTATATCCCAGGACAGTATAGGCACATGGGCACTAAAAGAAGAGATTTTGAGAAACCAATAAAATTTCAAAATCAAAATAGTGATGGGGCTATACTAAATCTAGCAGCACATGATCCCATAGACTGGCCAAATATCATTAGTATTTGGAAGGGGTTAATAGTTCAAAAATACATACAAAATCAGCATAATATAGGGAATAAGGTGGAGGATATGATAACTTATTTAGAAACATTTTTGGGTGAATCTGCTAAAGTCCTATGGGAACAATGGGTTGAAAAGAATCCTAATAACTACGAAGAGCTAAAAAGAGCAGGAAGTAATCCTCACAACTTTGCAAATATAGTATCTAATATTATCATAGCTGAAGACCCAGAATTAGGATATACAACCCTGCAAAATGAAAGATTAAAAGAAATAGAAAAATTAACTTTAACAAGCTGGAAAGGTATAAAGGAATTTTCTCAACATTATCTATATAATGCAACAACTGCTAAGCAAGGATACAATAAGGGAATAGTTGAGCGATATTTTAATAAACTACCTGACCCATTAGGTAGTATGATTTTTGAGGAATATAAAAAGGAAACTGAAGGAGCTGAAATTAATATTTCCCAAGCCATAACCTTCGTGTTCAAACAATTAAGAAAAATATGCACAGGAATACAAGCCCAAAGGTCAATGAAACATTCTGATTATAATTTTTGCAATAAAATAATACAAATACCTTTATCATATGGAGAAGATAGGCCTAGAAATAAAAGAAACCATAGATATCAAAGTAGAAATAGCAATAATATAAAGACAAAGAAAAGGTACTTCTTAAGAAGATCAGATAATAGAGCACCATTCTTACATAAACGAAATGTAAGAAGATATAACCCAAAGAAAACTTATGATAAGACATGCAGATGT
>Chr08:4249542-4250557:-1
TGAAAAACGAAGGAGAAAGAGAAAGACCAGCTAGGGCAGCAGGAAAATGGCCCCCTTATAGAGAAGAATTTTCATATAACTATATACCAGGTCAATATAGGCATATGGGTACAAAGAGAAGAGACTTTGAGAAGCCTGTTAAATTTCAAAACCAGAGGAGTGATGGTGCTATATTAAATTTAGCCGCACATGACCCTATTGATTGGCCTAATATTATTAGTATTTGGAAAGGTTTAATAGTTCAAAAATATATACAAAACCAGCACAATATAGGAAGTAAAGTTGAAGATATGATAACTTACTTAGAAACATTTTTAGGTGAATCTGCTAAGGTTCTATGGGAACAATGGGTTGAAAAGAATCCTACTAATTATGAAGAATTGAAAAGAGCTGGTAGCAATCCGCATAATTTTGCAAATGTTATATCTAACATTATTATAGCTGAAGATCCGGAATTAGGTTATACAACTTTGCAAAATGAAAGGTTAAAAGAAATAGAAAAATTAACGTTAACAAGTTGGAAAGGCATAAAAGAATTCTCCCAACATTATTTATATAATGCTACAACTGCTAAACAAGGATATAACAGGGGTATAGTTGAACGTTATTTCAATAAATTACCTGACCCACTAGGAAGTATGATATTTGAAGAATATAAAAAGGAAACTGAAGGAGCTGAAATCAACATCTCTCAAGCCATAACTTTTGTGTTTAAGCAACTAAGAAAAATATGCACGGGTATCCAAGCCCAAAGATCTATGAAACACTCGGATTACAATTTCTGCAATAAAATAGTTCAAATACCCTTATCATATGGAGAAGACAAGCCTAGAAGTAAAAGGATTTATAAACATCAAAATAGAAACCATAATAATATTAGAACAAAGAAAAGGTATTTCTTAAGAAGATCAGATAATAGAGCACCCTTCTTACATAAAAGAAATGTAAGAAGATATAATCCAAAGAAAACCTATGACAAAACATGCAGATGT
>Chr08:11284275-11285266:1
TGAAAAACGAAGGAGAAAGAGAAAGACCAGCTAGGGCAGCAGGAAAATGGCCCCCTGATAGAGAAGAATTTTCATATAACTATATACCAGGTCAATATAGGCATATGGGTACAAAGAGAAGAGACTTTGAGAAGCCTGTTAAATTTCAAAACCAGAGGAGTGATGGTGCTATATTAAATTTAGCCGCACATGACCCTATTGATTGGCCTAATATTATTAGTATTTGGAAAGGTTTAATAGTTCAAAAATATATACAAAACCAGCACAATATAGGAAGTAAAGTTGAAGATATGATAACTTACTTAGAAACATTCTTAGGTGAATCTGCTAAGGTTCTATGGGAACAATGGGTTGAAAAGAATCCTAATAATTATGAAGAATTGAAAAGAGCTGGTAGCAATCCGCATAATTTTGCAAATGTTATATCTAACATTATTATAGCTGAAGATCCGGAATTAGGTTATACAACTTTGCAAAATGAAAGGTTAAAAGAAATAGAAAAATTAACGTTAACAAGTTGGAAAGGCATAAAAGAATTCTCCCAACATTATTTATATAATGCTACAACTGCTAAACAAGGATATAACAGGGGAATAGTTGAACGTTACTTCAATAAATTACCTGACCCACTAGGAAGTATGATATTTGAAGAATATAAAAAGGAAACTGAAGGAGCTGAAATCAATATCTCTCAAGCCATAACTTTTGTGTTTAAGCAACTAAGAAAAATATGCACGGGTATCCAAGCCCAAAGATCTATGAAACACTCGGATTACAATTTTTGCAATAAAATAGTTCAAATACCCTTGTCATATGGAGAAGACAAGCCTAGAAGTAAAAGGATTTATAAACATCAAAATAGAAACCATAATAATATTAGAACAAAGAAAAGGTATTTCTTAAGAAGATCAGATAATAGAGCACCCTTCTTACATAAAAGAAATGTAAGAAGATATAATCCAAAGAAAACCTATGACAAAACATGCAGATGT
>Chr08:11293322-11294313:-1
TGAAAAACGAAGGAGAAAGAGAAAGACCAGCTAGGGCAGCAGGAAAATGGCCCCCTGATAGAGAAGAATTTTCATATAACTATATACCAGGTCAATATAGGCATATGGGTACAAAGAGAAGAGACTTTGAGAAGCCTGTTAAATTTCAAAACCAGAGGAGTGATGGTGCTATATTAAATTTAGCCGCACATGACCCTATTGATTGGCCTAATATTATTAGTATTTGGAAAGGTTTAATAGTTCAAAAATATATTCAAAACCAGCACAATATAGGAAGTAAAGTTGAAGATATGATAACCTACTTAGAAACATTCTTAGGTGAATCTGCTAAGATTCTATGGGAACAATGGGTTGAAAAGAATCCTAATAATTATGAAGAATTGAAAAGAGCTGGTAGCAATCCGCATAATTTTGCAAATGTAGTATCTAATATTATCATAGCTGAAGATCCGGAATTAGGTTATACAACTTTGCAAAATGAAAGGTTAAAAGAAATAGAAAAATTAACGTTAACAAGTTGGAAAGGCATAAAAGAATTCTCCCAACATTATTTATATAATGCTACAACTGCTAAGCAAGGATACAATAAGGGAATAGTTGAGCGATATTTTAATAAACTACCTGACCCATTAGGTAGTATGATTTTTGAGGAATATAAAAAGGAAACTGAAGGAGCTGAAATTAATATTTCCCAAGCCATAACCTTCGTGTTCAAACAATTAAGAAAAATATGCACAGGAATACAAGCCCAAAGGTCAATGAAACATTCTGATTATAATTTTTGCAATAAAATAGTTCAAATACCCTTGTCATATGGAGAAGACAAGCCTAGAAGTAAAAGGATTTATAAACATCAAAATAGAAACCATAATAATATTAGAACAAAGAAAAGGTATTTCTTAAGAAGATCAGATAATAGAGCACCCTTCTTACATAAAAGAAATGTAAGAAGATATAATCCAAAGAAAACCTATGACAAAACATGCAGATGT
>Chr08:11304819-11305810:1
TGAAAAACGAAGGAGAAAGAGAAAGACCAGCTAGGGCAGCAGGAAAATGGCCCCCTGATAGAGAAGAATTTTCATATAACTATATACCAGGTCAATATAGGCATATGGGTACAAAGAGAAGAGACTTTGAGAAGCCTGTTAAATTTCAAAACCAGAGGAGTGATGGTGCTATATTAAATTTAGCCGCACATGACCCTATTGATTGGCCTAATATTATTAGTATTTGGAAAGGTTTAATAGTTCAAAAATATATTCAAAACCAGCACAATATAGGAAGTAAAGTTGAAGATATGATAACCTACTTAGAAACATTCTTAGGTGAATCTGCTAAGATTCTATGGGAACAATGGGTTGAAAAGAATCCTAATAATTATGAAGAATTGAAAAGAGCTGGTAGCAATCCGCATAATTTTGCAAATGTTATATCTAACATTATTATAGCTGAAGATCCGGAATTAGGTTATACAACTTTGCAAAATGAAAGGTTAAAAGAAATAGAAAAATTAACGTTAACAAGTTGGAAAGGCATAAAAGAATTCTCCCAACATTATTTATATAATGCTACAACTGCTAAACAAGGATATAACAGGGGAATAGTTGAACGTTACTTTAATAAACTACCTGACCCATTAGGTAGTATGATTTTTGAGGAATATAAAAAGGAAACTGAAGGAGCTGAAATTAATATTTCCCAAGCCATAACCTTCGTGTTCAAACAATTAAGAAAAATATGCACAGGAATACAAGCCCAAAGGTCAATGAAACATTCTGATTATAATTTTTGCAATAAAATAGTTCAAATACCCTTGTCATATGGAGAAGACAAGCCTAGAAGTAAAAGGATTTATAAACATCAAAATAGAAACCATAATAATATTAGAACAAAGAAAAGGTATTTCTTAAGAAGATCAGATAATAGAGCACCCTTCTTACATAAAAGAAATGTAAGAAGATATAATCCAAAGAAAACCTATGACAAAACATGCAGATGT
>Chr08:11309000-11309991:1
TGAAAAACGAAGGAGAAAGAGAAAGACCAGCTAGGGCAGCAGGAAAATGGCCCCCTGATAGAGAAGAATTTTCATATAACTATATACCAGGTCAATATAGGCATATGGGTACAAAGAGAAGAGACTTTGAGAAGCCTGTTAAATTTCAAAACCAGAGGAGTGATGGTGCTATATTAAATTTAGCCGCACATGACCCTATTGATTGGCCTAATATTATTAGTATTTGGAAAGGTTTAATAGTTCAAAAATATATTCAAAACCAGCACAATATAGGAAGTAAAGTTGAAGATATGATAACCTACTTAGAAACATTCTTAGGTGAATCTGCTAAGATTCTATGGGAACAATGGGTTGAAAAGAATCCTAATAATTATGAAGAATTGAAAAGAGCTGGTAGCAATCCGCATAATTTTGCAAATGTAGTATCTAATATTATCATAGCTGAAGATCCGGAATTAGGTTATACAACTTTGCAAAATGAAAGGTTAAAAGAAATAGAAAAATTAACGTTAACAAGTTGGAAAGGCATAAAAGAATTCTCCCAACATTATTTATATAATGCTACAACTGCTAAACAAGGATATAACAGGGGAATAGTTGAACGTTACTTTAATAAACTACCTGACCCATTAGGTAGTATGATTTTTGAGGAATATAAAAAGGAAACTGAAGGAGCTGAAATTAATATTTCCCAAGCCATAACCTTCGTGTTCAAACAATTAAGAAAAATATGCACAGGAATACAAGCCCAAAGGTCAATGAAACATTCTGATTATAATTTTTGCAATAAAATAGTTCAAATACCCTTGTCATATGGAGAAGACAAGCCTAGAAGTAAAAGGATTTATAAACATCAAAATAGAAACCATAATAATATTAGAACAAAGAAAAGGTATTTCTTAAGAAGATCAGATAATAGAGCACCCTTCTTACATAAAAGAAATGTAAGAAGATATAATCCAAAGAAAACCTATGACAAAACATGCAGATGT
>Chr08:11313181-11314172:1
TGAAAAACGAAGGAGAAAGAGAAAGACCAGCTAGGGCAGCAGGAAAATGGCCCCCTGATAGAGAAGAATTTTCATATAACTATATACCAGGTCAATATAGGCATATGGGTACAAAGAGAAGAGACTTTGAGAAGCCTGTTAAATTTCAAAACCAGAGGAGTGATGGTGCTATATTAAATTTAGCCGCAGATGACCCTATTGATTGGCCTAATATTATTAGTATTTGGAAAGGTTTAATAGTTCAAAAATATATTCAAAACCAGCACAATATAGGAAGTAAAGTTGAAGATATGATAACCTACTTAGAAACATTCTTAGGTGAATCTGCTAAGATTCTATGGGAACAATGGGTTGAAAAGAATCCTAATAATTATGAAGAATTGAAAAGAGCTGGTAGCAATCCGCATAATTTTGCAAATGTAGTATCTAATATTATCATAGCTGAAGATCCGGAATTAGGTTATACAACTTTGCAAAATGAAAGGTTAAAAGAAATAGAAAAATTAACGTTAACAAGTTGGAAAGGCATAAAAGAATTCTCCCAACATTATTTATATAATGCTACAACTGCTAAACAAGGATATAACAGGGGAATAGTTGAACGTTACTTTAATAAACTACCTGACCCATTAGGTAGTATGATTTTTGAGGAATATAAAAAGGAAACTGAAGGAGCTGAAATTAATATTTCCCAAGCCATAACCTTCGTGTTCAAACAATTAAGAAAAATATGCACAGGAATACAAGCCCAAAGGTCAATGAAACATTCTGATTATAATTTTTGCAATAAAATAGTTCAAATACCCTTGTCATATGGAGAAGACAAGCCTAGAAGTAAAAGGATTTATAAACATCAAAATAGAAACCATAATAATATTAGAACAAAGAAAAGGTATTTCTTAAGAAGATCAGATAATAGAGCACCCTTCTTACATAAAAGAAATGTAAGAAGATATAATCCAAAGAAAACCTATGACAAAACATGCAGATGT
>Chr08:11317362-11318353:1
TGAAAAACGAAGGAGAAAGAGAAAGACCAGCTAGGGCAGCAGGAAAATGGCCCCCTGATAGAGAAGAATTTTCATATAACTATATACCAGGTCAATATAGGCATATGGGTACAAAGAGAAGAGACTTTGAGAAGCCTGTTAAATTTCAAAACCAGAGGAGTGATGGTGCTATATTAAATTTAGCCGCACATGACCCTATTGATTGGCCTAATATTATTAGTATTTGGAAAGGTTTAATAGTTCAAAAATATATTCAAAACCAGCACAATATAGGAAGTAAAGTTGAAGATATGATAACCTACTTAGAAACATTCTTAGGTGAATCTGCTAAGATTCTATGGGAACAATGGGTTGAAAAGAATCCTAATAATTATGAAGAATTGAAAAGAGCTGGTAGCAATCCGCATAATTTTGCAAATGTAGTATCTAATATTATCATAGCTGAAGATCCGGAATTAGGTTATACAACTTTGCAAAATGAAAGGTTAAAAGAAATAGAAAAATTAACGTTAACAAGTTGGAAAGGCATAAAAGAATTCTCCCAACATTATTTATATAATGCTACAACTGCTAAACAAGGATATAACAGGGGAATAGTTGAACGTTACTTTAATAAACTACCTGACCCATTAGGTAGTATGATTTTTGAGGAATATAAAAAGGAAACTGAAGGAGCTGAAATTAATATTTCCCAAGCCATAACCTTCGTGTTCAAACAATTAAGAAAAATATGCACAGGAATACAAGCCCAAAGGTCAATGAAACATTCTGATTATAATTTTTGCAATAAAATAGTTCAAATACCCTTGTCATATGGAGAAGACAAGCCTAGAAGTAAAAGGATTTATAAACATCAAAATAGAAACCATAATAATATTAGAACAAAGAAAAGGTATTTCTTAAGAAGATCAGATAATAGAGCACCCTTCTTACATAAAAGAAATGTAAGAAGATATAATCCAAAGAAAACCTATGACAAAACATGCAGATGT
>Chr08:11328546-11329537:-1
TGAAAAACGAAGGAGAAAGAGAAAGACCAGCTAGGGCAGCAGGAAAATGGCCCCCTGATAGAGAAGAATTTTCATATAACTATATACCAGGTCAATATAGGCATATGGGTACAAAGAGAAGAGACTTTGAGAAGCCTGTTAAATTTCAAAACCAGAGGAGTGATGGTGCTATATTAAATTTAGCCGCACATGACCCTATTGATTGGCCTAATATTATTAGTATTTGGAAAGGTTTAATAGTTCAAAAATATATTCAAAACCGGCACAATATAGGAAGTAAAGTTGAAGATATGATAACCTACTTAGAAACATTCTTAGGTGAATCTGCTAAGATTCTATGGGAACAATGGGTTGAAAAGAATCCTAATAATTATGAAGAATTGAAAAGAGCTGGTAGCAATCCGCATAATTTTGCAAATGTTATATCTAACATTATTATAGCTGAAGATCCGGAATTAGGTTATACAACTTTGCAAAATGAAAGGTTAAAAGAAATAGAAAAATTAACGTTAACAAGTTGGAAAGGCATAAAAGAATTCTCCCAACATTATTTATATAATGCTACAACTGCTAAGCAAGGATACAATAAGGGAATAGTTGAGCGATATTTTAATAAACTACCTGACCCATTAGGTAGTATGATTTTTGAGGAATATAAAAAGGAAACTGAAGGAGCTGAAATTAATATTTCCCAAGCCATAACCTTCGTGTTCAAACAATTAAGAAAAATATGCACAGGAATACAAGCCCAAAGGTCTATGAAACACTCGGATTACAATTTCTGCAATAAAATAGTTCAAATACCCTTGTCATATGGAGAAGACAAGCCTAGAAGTAAAAGGATTTATAAACATCAAAATAGAAACCATAATAATATTAGAACAAAGAAAAGGTATTTCTTAAGAAGATCAGATAATAGAGCACCCTTCTTACATAAAAGAAATGTAAGAAGATATAATCCAAAGAAAACCTATGACAAAACATGCAGATGT
>Chr08:20266084-20267072:1
TAAAAAATGAAGGAGAAAGAGAAAGACCAGCTAGGGCAGCAGGAAGATGGCCTCCAGAAAAAGAAGAATATTCATATCATTATATCCCAGGACAGTATAGGCACATGGGCACTAAAAGAAGAGATTTTGAGAAACCAATAAAATTTCAAAATCAAAAAAGTGATGGGGCTATACTAAATCTAGCAGCACATGATCCCATAGACTGGCCAAATATCATTAGTATTTGGAAGGGGTTAATAGTTCAAAAATATATACAAAATCAGCATAATATAGGGAATAAGGTGGAGGATATGATAACTTATTTAGAAACATTTTTGGGTGAATCTGCTAAAGTCCTATGGGAACAATGGGTTGAAAAGAATCCTAATAACTACGAAGAGCTAAAAAGAGCAGGAAATAATCCTCACAACTTTGCAAATATAGTATCTAATATTATCATAGCTGAAGACCCAGAATTAGGATATACAACCCTGCAAAATGAAAGATTAAAAGAAATAGAAAAATTAACCTTAACAAGCTGGAAAGGTATAAAGGAATTTTCTCAACATTATCTATATAATGCAACAACTGCTAAGCAAGGATACAATAAGGGAATAGTTGAGCGATATTTTAATAAACTACCTGACCCATTAGGTAGTATGATTTTTGAGGAATATAAAAAGGAAACTGAAGGAGCTGAAATTAATATTTCCCAAGCCATAACCTTCGTGTTCAAACAATTAAGAAAAATATGCACAGGAATACAAGCCCAAAGGTCAATGAAACATTCTGATTATAATTTTTGCAATAAAATAATACAAATGCCTTTATCATATGGAGAAGATAGGCCTAGAAATAAAAGAAACCATAGATA---AAGTAGAAATAATAATAATATAAAGACAAAGAAAAGGTACTTCTTAAGAAGATCAGATAATAGAGCACCTTTCTTACATAAACGAAATGTAAGAAGATATAACCCAAAGAAAACTTTTGATAAGACATGCAGATGT
>Chr08:21347904-21348893:-1
TGAAAAACGAAGGAGAAAGAGAAAGACCAGCTAGGGCAGCAGGAAAATGGCCCCCTGATAGAGAAGAATTTTCATATAACTATAT--CAGGACAATATAGGCACATGGGTACTAAGAGAAGAGACTTTGAGAAGCCTGTTAAATTTCAAAACCAGAGGAGTGATGGTGCTATATTAAATTTAGCTGCACATGACCCTATTGATTGGCCTAATATTATTAGTATTTGGAAAGGTTTAATAGTTCAAAAATATATACAAAACCAGCACAATATAGGAAGTAAAGTTGAAGATATGATAACCTACTTAGAAACATTTTTAGGTGAATCTGCTAAGGTTCTATGGGAACAATGGGTTGAAAAGAATCCTAATAATTATGAAGAATTGAAAAGAGCTGGTAGCAATCCGTATAATTTTTCAAATGTTATATCTAACATTATTATAGCTGAAGATTCGGAATTAGGTTATACAACTTTGCAGAATGAAAGGTTAAAAGAAATAGAAAAATTAACGTTAACAAGTTTGAAAGGCATAAAAGAATTCTCCCAACATTATTTATATAATGCTACAACTGCTAAACAAGGATATAACAGGGGAATAGTTGAACGTTATTTCAATAAATTACCTGACCCACTAGGAAGTATGATATTTGAAGAATATAAAAAGGAAACTGAAGGAGCTGAAATCAACATCTCGCAAGCCATAACTTTTGTGTTTAAGCAACTAAGAAAAATATGCACGGGTATCCAAGCCCAAAGATCTATGAAACACTCTGATTACAATTTCTGCAATAAAATAGTTCAAATACCCTTGTCATATGGAGAAGACAAGCCTAGAAGTAAAAGGATTTATAAACATCAAAATAGAAACAACAATAATATTAGAACAAAGAAAAGGTATTTCTTAAGAAGATCAGATAATAGAGCACCCTTCTTACATAAAAGAAATGTAAGAAGATATAATCCAAAGAAAACCTATGACAAAACATGCAGATGT
>Chr08:25008915-25009906:-1
TGAAAAACGAAGGAGAAAGAGAAAGACCAGCTAGGGCAGCAGGAAAATGGCCCCCTGATAGAGAAGAATTTTCATATAACTATATACCAGGTCAATATAGGCATATGGGTACAAAGAGAAGAGACTTTGAGAAGCCTGTTAAATTTCAAAACCAGAGGAGTGATGGTGCTATATTAAATTTAGCCGCACATGACCCTATTGATTGGCCTAATATTATTAGTATTTGGAAAGGTTTAATAGTTCAAAAATATATACAAAACCAACACAATATAGGAAGTAAAGTTGAAGATATGATAACCTACTTAGAAACATTTTTAGGTGAATCTGCTAAGGTTCTATGGGAACAATGGGTTGAAAAGAATCCTAATAATTATGAAGAATTGAAAAGAGCTGGTAGCAATCCGCATAATTTTGCAAATGTTATATCTAACATTATTATAGCTGAAGATCCGGAATTAGGTTATACAACTTTGCAAAATGAAAGGTTAAAAGAAATAGAAAAATTAACGTTAACAAGTTGGAAAGGCATAAAAGAATTCTCCCAACATTATTTATATAATGCTACAACTGCTAAACAAGGATATAACAGGGGAATAGTTGAACGTTACTTCAATAAATTACCTGACCCACTAGGAAGTATGATATTTGAAGAATATAAAAAGGAAACTGAAGGAGTTGAAATCAATATCTCTCAAGCTATAACTTTTGTGTTTAAGCAACTAAGAAAAATATGCACGGGTATCCAAGCCCAAAGATCTATGAAACACTCGGATTACAATTTCTGCAATAAAATAGTTCAAATACCCTTGTCATATGGAGAAGACAAGCCTAGAAGTAAAAGGATTTATAAACATCAAAATAGAAACCATAATAATATTAGAACAAAGAAAAGGTATTTCTTAAGAAGATCAGATAATAGAGCACCCTTCTTACATAAAAGAAATGTAAGAAGATATAATCCAAAGAAAACCTATGACAAAACATGCAGGTGT
>Chr08:11160929-11161920:-1
TAAAAAATGAAGGAGAAAGAGAAAGACCAGCCAGGGCAGCAGGAAGATGGCCTCCAGAAAAAGAAGAATATTCATATCATTATATCCCAGGACAGTATAGGCACATGGGCACTAAAAGAAGAGATTTTGAGAAACCAATAAAATTTCAAAATAAAAAAAGTGATGGGGCTATACTAAATCTAGCAGCACATGATCCCATAGACTGGCCAAATATCATTAGTATTTGGAAGGGGTTAATAGTTCAAAAATACATACAAAATCAGCATAATATAGGGAATAAGGTGGAGGATATGATAACTTATTTAGAAACATTTTTGGGTGAATCTGCTAAAGTCCTACGGGAACAATGGATTGAAAAGAATCCTAATAACTATGAAGAGCTAAAAAGAGCAGGAAGTAATCCTCACAACTTTGCAAATATAGTATCTAATATTATCATAGCTGAAGACCCAGAATTAGGATATACAACCCTGCAAAATGAAAGATTAAAAGAAATAGAAAAATTAACTTTAACAAGCTGGAAAGGTATAAAGGAATTTTCTCAACATTATCTATATAATGCAACAACTGCTAAGCAAGGATACAATAAGGGAATAGTTGAGCGATATTTTAATAAACTACCTGACCCATTAGGTAGTATGATTTTTGAGGAATATAAAAAGGAAACTGAAGGAGCTGAAATTAATATTTCCCAAGCCATAACCTTCGTGTTCAAACAATTAAGAAAAATATGCACAGGAATACAAGCCCAAAGGTCAATGAAACATTCTGATTATAATTTTTGCAATAAAATAATACAAATACCTTTATCATATGGAGAAGATAGGCCTAGAAATAAAAGAAACCATAGATATCAAAGTAGAAATAGCAATAATATAAAGACAAAGAAAAGGTACTTCTTAAGAAGATCAGATAATAGAGCACCTTTCTTACATAAACGAAATGTAAGAAGATATAACCCAAAGAAAACTTATGATAAGACATGCAGATGT
>Chr08:11165730-11166721:1
TGAAAAACGAAGGAGAAAGAGAAAGACCAGCTAGGGCAGCAGGAAAATGGCCCCCTGATAGAGAAGAATTTTCATATAACTATATACCAGGTCAATATAGGCATATGGGTACAAAGAGAAGAGACTTTGAGAAGCCTATTAAATTTCAAAACCAGAGGAGTGATGGTGCTATATTAAATTTAGCCGCACATGACCCTATTGATTGGCCTAATATTATTAGTATTTGGAAAGGTTTAATAGTTCAAAAATATATACAAAACCAGCACAATATAGGAAGTAAAGTTGAAGATATGATAACTTACTTAGAAACATTTTTAGGTGAATCTGCTAAGGTTCTATGGGAACAATGGGTTGAAAAGAATCCTAATAATTATGAAGAATTGAAAAGAGCTGGTAGCAATCCGCATAATTTTGCAAATGTTATATCTAACATTATTATAGCTGAAGATCCGGAATTAGGTTATACAACTTTGCAAAATGAAAGGTTAAAAGAAATAGAAAAATTAACGTTAACAAGTTGGAAAGGCATAAAAGAATTCTCCCAACATTATTTATATAATGCTACAACTGCTAAACAAGGATATAACAGGGGAATAGTTGAACGTTACTTTAATAAACTACCTGACCCATTAGGTAGTATGATATTTGAAGAATATAAAAAGGAAACTGAAGGAGCTGAAATCAATATCTCTCAAGCCATAACTTTTGTGTTTAAGCAACTAAGAAAAATATGCACGGGTATCCAAGCCCAAAGATCTATGAAACACTCGGATTACAATTTCTGCAATAAAATAGTTCAAATACCCTTGTCATATGGAGAAGACAAGCCTAGAAGTAAAAGGATTTATAAACATCAAAATAGAAACCATAATAATATTAGAACAAAGAAAAGATATTTCTTAAGAAGATCAGATAATAGAGCACCTTTCTTACATAAACGAAATGTAAGAAGATATAACCCAAAGAAAACTTATGATAAGACATGCAGATGT
>Chr08:11262840-11263831:1
TGAAAAACGAAGGAGAAAGAGAAAGACCAGCTAGGGCAGCAGGAAAATGGCCCCCTGATAGAGAAGAATTTTCATATAACTATATACCAGGTCAATATAGGCATATGGGTACAAAGAGAAGAGACTTTGAGAAGCCTGTTAAATTTCAAAACCAGAGGAGTGATGGTGCTATATTAAATTTAGCCGCACATGACCCTATTGATTGGCCTAATATTATTAGTATTTGGAAAGGTTTAATAGTTCAAAAATATATTCAAAACCAGCACAATATAGGAAGTAAAGTTGAAGATATGATAACCTACTTAGAAACATTCTTAGGTGAATCTGCTAAGATTCTATGGGAACAATGGGTTGAAAAGAATCCTAATAATTATGAAGAATTGAAAAGAGCTGGTAGCAATCCGCATAATTTTGCAAATGTAGTATCTAATATTATCATAGCTGAAGATCCGGAATTAGGTTATACAACTTTGCAAAATGAAAGGTTAAAAGAAATAGAAAAATTAACGTTAACAAGTTGGAAAGGCATAAAAGAATTCTCCCAACATTATTTATATAATGCTACAACTGCTAAACAAGGATATAACAGGGGAATAGTTGAACGTTACTTTAATAAACTACCTGACCCATTAGGTAGTATGATTTTTGAGGAATATAAAAAGGAAACTGAAGGAGCTGAAATTAATATTTCCCAAGCCATAACCTTCGTGTTCAAACAATTAAGAAAAATATGCACAGGAATACAAGCCCAAAGGTCAATGAAACATTCTGATTATAATTTTTGCAATAAAATAGTTCAAATACCCTTGTCATATGGAGAAGACAAGCCTAGAAGTAAAAGGATTTATAAACATCAAAATAGAAACCATAATAATATTAGAACAAAGAAAAGGTATTTCTTAAGAAGATCAGATAATAGAGCACCCTTCTTACATAAAAGAAATGTAAGAAGATATAATCCAAAGAAAACCTATGACAAAACATGCAGATGT
>Chr08:11269834-11270825:1
TGAAAAACGAAGGAGAAAGAGAAAGACCAGCTAGGGCAGCAGGAAAATGGCCCCCTGATAGAGAAGAATTTTCATATAACTATATACCAGGTCAATATAGGCATATGGGTACAAAAAGAAGAGACTTTGAGAAGCCTGTTAAATTTCAAAACCAGAGGAGTGATGGTGCTATATTAAATTTAGCCGCACATGACCCTATTGATTGGCCTAATATTATTAGTATTTGGAAAGGTTTAATAGTTCAAAAATATATTCAAAACCAGCACAATATAGGAAGTAAAGTTGAAGATATGATAACCTACTTAGAAACATTCTTAGGTGAATCTGCTAAGATTCTATGGGAACAATGGGTTGAAAAGAATCCTAATAATTATGAAGAATTGAAAAGAGCTGGTAGCAATCCGCATAATTTTGCAAATGTTATATCTAACATTATTATAGCTGAAGATCCGGAATTAGGTTATACAACTTTGCAAAATGAAAGGTTAAAAGAAATAGAAAAATTAACGTTAACAAGTTGGAAAGGCATAAAAGAATTCTCCCAACATTATTTATATAATGCTACAACTGCTAAGCAAGGATACAATAAGGGAATAGTTGAGCGATATTTTAATAAACTACCTGACCCATTAGGTAGTATGATTTTTGAGGAATATAAAAAGGAAACTGAAGGAGCTGAAATTAATATTTCCCAAGCCATAACCTTCGTGTTCAAACAATTAAGAAAAATATGCACAGGAATACAAGCCCAAAGGTCTATGAAACACTCGGATTACAATTTCTGCAATAAAATAGTTCAAATACCCTTGTCATATGGAGAAGACAAGCCTAGAAGTAAAAGGATTTATAAACATCAAAATAGAAACCATAATAATATTAGAACAAAGAAAAGGTATTTCTTAAGAAGATCAGATAATAGAGCACCCTTCTTACATAAAAGAAATGTAAGAAGATATAATCCAAAGAAAACCTATGACAAAACATGCAGATGT
>Chr08:11277079-11278070:1
TGAAAAACGAAGGAGAAAGAGAAAGACCAGCTAGGGCAGCAGGAAAATGGCCCCCTGATAGAGAAGAATTTTCATATAACTATATACCAGGTCAATATAGGCATATGGGTACAAAGAGAAGAGACTTTGAGAAGCCTGTTAAATTTCAAAACCAGAGGAGTGATGGTGCTATATTAAATTTAGCCGCACATGACCCTATTGATTGGCCTAATATTATTAGTATTTGGAAAGGTTTAATAGTTCAAAAATATATTCAAAACCAGCACAATATAGGAAGTAAAGTTGAAGATATGATAACCTACTTAGAAACATTCTTAGGTGAATCTGCTAAGATTCTATGGGAACAATGGGTTGAAAAGAATCCTAATAATTATGAAGAATTGAAAAGAGCTGGTAGCAATCCGCATAATTTTGCAAATGTTATATCTAACATTATTATAGCTGAAGATCCGGAATTAGGTTATACAACTTTGCAAAATGAAAGGTTAAAAGAAATAGAAAAATTAACGTTAACAAGTTGGAAAGGCATAAAAGAATTCTCCCAACATTATTTATATAATGCTACAACTGCTAAACAAGGATATAACAGGGGAATAGTTGAACGTTACTTTAATAAACTACCTGACCCATTAGGTAGTATGATTTTTGAGGAATATAAAAAGGAAACTGAAGGAGCTGAAATTAATATTTCCCAAGCCATAACCTTCGTGTTCAAACAATTAAGAAAAATATGCACAGGAATACAAGCCCAAAGGTCAATGAAACATTCTGATTATAATTTTTGCAATAAAATAGTTCAAATACCCTTGTCATATGGAGAAGACAAGCCTAGAAGTAAAAGGATTTATAAACATCAAAATAGAAACCATAATAATATTAGAACAAAGAAAAGGTATTTCTTAAGAAGATCAGATAATAGAGCACCCTTCTTACATAAAAGAAATGTAAGAAGATATAATCCAAAGAAAACCTATGACAAAACATGCAGATGT
>Chr09:1113393-1114384:-1
TAAAAAATGAAGGAGAAAGAGAAAGACCAGCCAGGGCAGCAGGAAGATGGCCTCCAGAAAAAGAAGAATATTCATATCATTATATCCCAGGACAGTATAGGCACATGGGCACTAAAAGAAGAGATTTTGAGAAACCAATAAAATTTCAAAATCAAAAAAGTGATGGGGCTATACTAAATCTAGCAGCACATGATCCCATAGACTGGCCAAATATCATTAGTATTTGGAAGGGGTTAATAGTTCAAAAATACATACAAAATCAGCATAATATAGGGAATAAGGTGGAGGATATGATAACTTATTTAGAAACATTTTTGGGTGAATCTGCTAAAGTCCTATGGGAACAATGGGTTGAAAAGAATCCTAATAACTATGAAGAGCTAAAAAGAGCAGGAAGTAATCCTCACAACTTTGCAAATATAGTATCTAATATTATCATAGCTGAAGACCCAGAATTAGGATATACAACCCTGCAAAATGAAAGATTAAAAGAAATAGAAAAATTAACTTTAACAAGCTGGAAAGGTATAAAGGAATTTTCTCAACATTATCTATATAATGCAACAACTGCTAAGCAAGGATACAATAAGGGAATAGTTGAGCGATATTTTAATAAACTACCTGACCCATTAGGTAGTATGATTTTTGAGGAATATAAAAAGGAAACTGAAGGAGCTGAAATTAATATTTCCCAAGCCATAACCTTCGTGTTCAAACAATTAAGAAAAATATGCACAGGAATACAAGCCCAAAGGTCAATGAAACATTCTGATTATAATTTTTGCAATAAAATAATACAAATACCTTTATCATATGGAGAAGATAGGCCTAGAAATAAAAGAAACCATAGATATCAAAGTAGAAATAGCAATAATATAAAGACAAAGAAAAGGTACTTCTTAAGAAGATCAGATAATAGAGCACCTTTCTTACATAAACGAAATGTAAGAAGATATAACCCAAAGAAAACTTATGATAAGACATGCAGATGT
>Chr09:15203214-15204205:1
TGAAAAACGAAGGAGAAAGAGAAAGACCAGCTAGGGCAGCAGGAAAATGGCCCCCTGATAGAGAAGAATTTTCATATAACTATATACCAGGTCAATATAGGCATATGGGTACAAAGAGAAGAGACTTTGAGAAGCCTGTTAAATTTCAAAACCAGAGGAGTGATGGTGCTATATTAAATTTAGCCGCACATGACCCTATTGATTGGCCTAATATTATTAGTATTTGGAAAGGTTTAATAGTTCAAAAATATATACAAAACCAGCACAATATAGGAAGTAAAGTTGAAGATATGATAACCTACTTAGAAACATTCTTAGGTGAATCTGCTAAGATTCTATGGGAACAATGGGTTGAAAAGAATCCTAATAATTATGAAGAATTGAAAAGAGCTGGTAGCAATCCGCATAATTTTGCAAATGTTATATCTAACATTATTATAGCTGAAGATCCGGAATTAGGTTATACAACTTTGCAAAATGAAAGGTTAAAAGAAATAGAAAAATTAACGTTAACAAGTTGGAAAGGCATAAAAGAATTCTCCCAACATTATTTATATAATGCTACAACTGCTAAACAAGGATATAACAGGGGAATAGTTGAACGTTACTTTAATAAATTACCTGACCCACTAGGAAGTATGATATTTGAAGAATATAAAAAGGAAACTGAAGGAGCTGAAATCAATATCTCTCAAGCTATAACTTTTGTGTTTAAGCAACTAAGAAAAATATGCACGGGTATCCAAGCCCAAAGATCTATGAAACACTCGGATTACAATTTCTGCAATAAAATAGTTCAAATACCCTTGTCATATGGAGAAGACAAGCCTAGAAGTAAAAGGATTTATAAACATCAAAATAGAAACCATAATAATATTAGAACAAAGAAAAGATATTTCTTAAGAAGATCAGATAATAGAGCACCCTTCTTACATAAAAGAAATGTAAGAAGATATAATCCAAAGAAAACCTATGACAAAACATGCAGATGT
>Chr09:15206472-15207433:1
TGAAAAACGAAGGAGAAAGAGAAAGACCAGCTAGGGCAGCAGGAAAATGGCCCCCTGATAGAGAAGAATTTTCATATAACTATATACCAGGTCAATATAGGCATATGGGTACAAAGAGAAGAGACTTTGAGAAGCCTGTTAAATTTCAAAACCAGAGGAGTGATGGTGCTATATTAAATTTAGCCGCACATGACCCTATTGATTGGCCTAATATTATTAGTATTTGGAAAGGTTTAATAGTTCAAAAATATATACAAAACCAGCACAATATAGGAAGTAAAGTTGAAGATATGATAACCTACTTAGAAACATTTTTAGGTGAATCTGCTAAGGTTCTATGGGAACAATGGGTTGAAAAGAATCCTAATAATTATGAAGAATTGAAAAGAGCTGGTAGCAATCCACATAATTTTGCAAATGTTATATCTAACATTATTATAGCTGAAGATCCGGAATTAGGTTATACGACTTTGCAAAATGAAAGGTTAAAAGAAATAGAAAAATTAACGTTAACAAGTTGGAAAGGCATAAAAGAATTCTCCCAATATTATTTATATAATGCTACAACTGCTAAACAAGGATATAACAGGGGAATAGTTGAACGTTATTTCAATAAATTACCTGACCCACTAGGAAGTATGATATTTGAAGAATATAAAAAAGAAACTGAAGGAGCTGAAATCAACATCTCTCAAGCCATAACTTTTGTGTTTAAGCAACTAAGAAAAATATGCACGGGTATCCAAGCCCAAAGATCTATGAAACACTCGGATTACAATTTCTGCAATAAAATAGTTCAAATACCCTTGTCATATGGAGAAGACAAGCCTAGAA------------------------------ACAACAATAATATTAGAACAAAGAAAAGGTATTTCTTAAGAAGATCAGATAATAGAGCACCCTTCTTACATAAAAGAAATGTAAGAAGATATAATCCAAAGAAAACCTATGACAAAACATGCAGATGT
>Chr09:16869439-16870415:1
TGAAAAACGAAGGAGAAAGAGAAAGACCAGCTAGGGCAGCAGGAAAATGGCCCCCTGATAGAGAAGAATTTTCATATAACTATA---------------GGCATATGGGTACAAAGAGAAGAGACTTTGAGAAGCCTGTTAAATTTCAAAACCAGAGGAGTGATGGTGCTATATTAAATTTAGCCGCACATGACCCTATTGATTGGCCTAATATTATTAGTATTTGGAAAGGTTTAATAGTTCAAAAATATATACAAAACCAGCACAATATAGGAAGTAAAGTTGAAGATATGATAACCTACTTAGAAACATTTTTAGGTGAATCTGCTAAGGTTCTATGGGAACAATGGGTTGAAAAGAATCCTAATAATTATGAAGAATTGAAAAGAGCTGGTAGCAATCCGCATAATTTTGCAAATGTTATATCTAACATTATTATAGCTGAAGATCCGGAATTAGGTTATACAACTTTGCAAAATGAAAGGTTAGAAGAAATAGAAAAATTAACGTTAACAAGTTGGAAAGGCATAAAAGAATTCTCCCAACATTATTTATATAATGCTACAACTGCAAAACAAGGATATAACAGGGGAATAGTTGAACGTTACTTCAATAAATTACCTGACCCACTAGGAAGTATGATATTTGAAGAATATAAAAAGGAAACTGAAGGAGCTGAAATCAATATCTCTCAAGCTATAACTTTTGTGTTTAAGCAACTAAGAAAAATATGCACGGGTATCCAAGCCCAAAGATCTATGAAACACTCGGATTACAATTTCTGCAATAAAATAGTTCAAATACCCTTGTCATATGGAGAAGACAAGCCTAGAAGTAAAAGGATTTATAAACATCAAAATAGAAACCATAATAATATTAGAACAAAGAAAAGGTATTTCTTAAGAAGATCAGATAATAGAGCACCCTTCTTACATAAAAGAAATGTAAGAAGATATAATCCAAAGAAAACCTATGACAAAACATGCAGATGT

#for S6 Fig. (PR)
>Chr01:757049-758633:-1
AAAACATGCAGATGTTTTATATGCAACTCGCCAGATCATTTAAGTAGAACATGCCCAAATAAAGATCAAAAGAGATATTCTAGTAAATATGAAGAACAAGAGAGGATTCTAATTATAGATAGCGTAAATGAAAACATATTAGTATGTGATGATGAAATAAAAGATGACGAGTCAATATATTCTATCATAGAAACAGACGAAGTTGAAACCATCAACGAAGAATATGAATCATCCGATGAAGAGTTAGATTTAATTGACGAATTAGCAGGTTTAAAGGTTGAAATGATGGATCAATTAAATTGTGAACATGATTGGATTAGAGGAAAGGGTGACTATAATATCAAATGTGCTTTTTGCATATATTACCCTAGTCAAGAAAATAGAGTGACTTGTAGTATATGTCTAAAACAAGCTTGTGCTGAATGTATAAAAGCAAATAAACAAAAATGGAGAAAAGAAATAGAATTAGAATCAGATGAAAAGACTTTATCTAGTAGAGTACGAGTGTTAGAAAATAGACTAAATAAACTAGAAGTAGAATTAGAGAACCTAAAAAATAATTGCGATATTAAGGCATTACCAGAGAATAAGGACATACAAAACACCGAATTTAAAGAGCAATTGATAACATTAAAAGACAGTAATACTGCTAAAATAATTCAACTAAGAGAGGCCATAACTAATTTTGGAAAAAAATATATAGTAAGATTGCCTTTCAAAGAAATATTAGGTATAAGAATCCCTGTTAAAATAAAATTGACACCCAAAGTATCTTATAAAATATTAGCACTAGTAGACACCGGGTGTACAAAGAATATTATTCATGACAAATATTTCATAAGATGTCCTGAAATAGTTCACACAATTGACGACAATAAGGCAGAAGTTTCCACAGACATGTCCGGAATAAAGAAAATTCATAATCAGTTAGCTTATAATATGGAGGTTTACATTAATGCAACTAAATATATAATAGATGAGATTACAATAAGAGATTTGTCAATGATTAATGATGACATGATAATTGTCCTAAGGTTCCTTCAACAATCAGTACAAACCACAGTAATACATGAGCAAGGAATTACTTTTATCCCATATCAAAATAATGTTCCATATATCTCAGAGGTACGAAAGCGTGGTGGAGTCTCCCCC---------------AAACTCGACAACTTAGAAGTACCCAATCTTGAGCCTGAAGAAAGAATTAATGAATATGAGCTTAGTGAGAATATAGACAACTATTATATATCA
>Chr01:11694628-11696221:-1
AAAACATGCAGATGTTTTATATGCAACTCGCCAGATCATTTATGTAGAACATGCCCAAATAAAGATCAAAAGAGATATTCTAGTAAATATGAAGAACAAGAGAGGGTTCTAATTATAGATAGCGTAAACGAAAACATATTAGTATGTGATGATGAAATAAAAGGTGACGAATCAATATATTCTATCATAGAAACAGACGAAGTTGAAACTATCAACGAAGAATATGAATCATCCGATGAAGAGTTAGATTTAATTGACGAATTAGCAGGTCTAAAGGTTGAAATGATGGATCAATTAAATTGTGAACATGATTGGATTAGAGGAAAGGGTGACTATAATATCAAATGTGCTTTTTGCATATATTACCCTAGTCAAGAAAATAGAGTGACTTGTAGTATATGTCTAAAACAAGCTTGTGCTGAATGTATAAAAGCAAATAAACAAAAATGGAGAAAAGAGATAGAATTAGAATCAGATGAAAAGACTTTATCTAGTAGAGTACGAGTGTTAGAAAATAGACTAAATAAACTAGAAGTAGAATTAGAGAACCTAAAAAATAATTGCGATATTAAGGCACTACCAGAGAATAAGGGCATACAAAACACCGAATTTAAAGAGCAATTGATAACATTAAAAGACAGTAATACTGCTAAAATAATTCAACTAAGAGATGCCATAACTAATTTTGGAAATAAATATATAGTAAGATTGCCTTTCAAAGAAATATTAGGTATAAGAATCCCTGTTAAAATAAAATTGACACCCAAAGTATCTTATAAAATATTAGCACTAGTAGACACCGGGTGTACAAAGAATATTATTCATGACAAATATTTCATAAGATGTCCTGAAATAGTTCACACAATTGACGACAATAAGGCAGAAGTTTCCATAGACATGTCCGGAATAAAGAAAATTCATAATCAGTTAGCTTATAATATGGAGGTTTACATTAATGCAACTAAATATATAATAGATGAGATTACAATAAGAGATTTGTCAATGATTAATGATGACATGATAATTGGCCTAAGGTTCCTTCAACAATCAGTACAAACCACAGTAATACATGAGCAAGGAATTACTTTTATCCCATATCAAAATAATGTTCCATATATCTCAGAGGTACGAAAGCGTGGTGGAGTCTCCCCC------AAACTCCCCAAACTCGACAACTTAGAAGTACCCAATCTTGAGCCTGAAGAAAGAATTAATGAATATGAGCTTAGTGAGAATATAGACAACTATTATATATCA
>Chr02:8817537-8819120:1
AAGACATGCAGATGTTTCATATGTAATTCACCAGATCATTTAAGTAGAACTTGCCCAAATAAAGATCAAAAAAGATATTCTAGTAAATATGAAGAACAAGAGAGAGTTTTAATTATAGATAGCGTAAATGAAAATATATTAGTATGTGATGATGAAATAAAAGATGACGAATCAATATATTCTATCATAGAAACAGATGAAATTGAAAACACCAATGAAGAGTATGAATCAACCGATGAAGAGTTAGATTTAATTGACGAACTAGCCGGTTTAAAAATAGAATTGATGGATCAGTTAAATTGTGAACATGATTGGATTAGAGGAAAAGGAGATTATAACATTAAATGTGCTTTTTGCATCTATTACCCAAGCCAAGATAATAGAGTAACCTGTAGTATATGCTTAAAACAAGCTTGTGTTGAATGTATAAAAGCAAATAAACAAAAATGGAGAAAAGAGATAGAATTAGAATCAGATGAAAGGATATTATCTAGTAGAGTACGAGTTTTAGAAAACAGAATAAATAAACTAGAAGTGGAACTAGAGAATCTAAAAATTAACTATGATATTAAGGCATTACCAGAAAATAAGGATATACAAAATACCGAATTTAAAGAGCAAGTGATAACATTAAAAGACAGTAATACTGCTAAAATAATTCAACTAAAAGATGCCATAACTAATTTTGGAAATAAATATATAGTAAAACTGCCTTTCAAAGAAATTTTGGGAATAAGAATACCGGTAAAAGTAAAACTATCACCCAAGGTATCATATAAAATTCTAGCACTAGTAGACACTGGGTGTACAAAAAATATTATTCATGATAAGTACTTCATAAAATGTCCAGAAATAGTTCATACAATTGATGATAATAAGGCAGAAGTCTCTACAGACATGTCCGGAATAAAGAAAATTCATAATCAGCTAGCTCATAATGTTGAAGTATACATTAATGGAACTAAATATATAATAGATGAGATTACAATAAGAAACTTATCCATGATAAGTGATGACATGATAATTGGCCTAAGGTTTTTACAACAATCGGTACAAACCACAGTAATACATGAGCAAGGAATTACTTTTATCCCATATCAAAACAATGTGCCATATATCTCAGAGGTACGAAAGCGTGGTGGAGCCAGAATC---------------AAACCCAACAACCTTGAAGCACTCAACCTTGAGTCTGAAGAAAGAATTAATGAATATGAACTTAGTGAGAATATAGACATCTATTATATATCA
>Chr04:9825318-9826903:-1
AAAACATGCAGATGTTTTATATGCAACTCGCCAGATCATTTAAGTAGAACATGCCCAAATAAAGATCAAAAGAGATATTCTAGTAAATATGAAGAACAAGAGAGGGTTCTAATTATAGATAGCGTAAACGAAAACATATTAGTATGTGATGATGAAATAAAAGATGACGAATCAATATATTCTATCATAGAAACAAACGAAGTTGAAACTATCAACGAAGAATATGAATCATCCGATGAAGAGTTAGATTTAATTGACGAATTAGCAGGTTTAAAGGTTGAAATGATGGATCAATTAAATTGTGAACATGATTGGATTAGAGGAAAGGGTGACTATAATATCAAATGTGCTTTTTGCATATATTACCCAAGTCAAGAAAATAGAGTGACTTGTAGTATATGTCTAAAACAAACTTGTGCTGAATGTATAAAAGCAAATAAACAAAAATGGAGAAAAGAGATAGAATTAGAATCAGATGAAAAGATTTTATCTAGTAGAGTACGAGTGTTAGAAAATAGACTAAATAAATTAGAAGTAGAATTAGAGAACCTAAAAAATAATTGTGATATTAAAGCATTACCAGAAAATAAGGACATACAAAACACCGAATTTAAAGAGCAATTGATAACACTAAAAGACAGTAATACTGCTAAAATAATTCAACTAAGAGATGCCATAACTAATTTTGGAAATAAATATATAGTAAGATTGCCTTTCAAAGAAATATTAGGTATAAGAATCCCTGTTAAAGTAAAATTGACACCCAAAGTATCTTATAAAATATTAGCACTAGTAGACACCGGGTGTACAAAGAATATTATTCATGACAAATATTTCATAAGATGTCCTGAAATAGTTCACACAATTGACGACAATAAGGCAGAAGTTTCCACAGACATATCCGGAATAAAGAAAATTCATAATCAGTTAGCTTATAATATGGAGGTTTACATTAATGCAACTAAATATATAATAGATGAGATTACAATAAGAGATTTGTCAATGATTAATGATGACATGATAATTGGCCTAAGGTTCCTTCAACAATCAGTACAAACCACAGTAATACATGAGCAAGGAATTACTTTTATCCCATATCAAAATAATGTTCCATATATCTCAGAGGTACGAAAGCGTGGTGGAATCTCCCCC---------------AAACTCGACAACTTAGAAGTACCTAATCTTGAGTCTGAAGAAAGAATTAATGAATATGAGCTTAGTGAGAATATAGACAACTATTATATATCA
>Chr04:18577962-18579545:1
AAGACATGCAGATGTTTCATATGTAATTCACCAGATCATTTAAGTAGAACTTGCGCAAATAAAGATCAAAAAAGATATTCTAGTAAATATGAAGAACAAGAGAGAGTTTTAATTATAGATAGCGTAAATGAAAATATATTAGTTTGTGATGATGAAATAAAAGATGACGAATCAATATATTCTATCATAGAAACAGATGAAATTGAAAACACCAATGAAGAGTATGAATCAACCGATGAAGAGTTAGATTTAATTGACGAACTAGCAGGTTTAAAAATAGAAATGATGGATCAGTTAAATTGTGAACATGATTGGATTAGAGGGAAATGAGATTATAACATTAAATGTGCTTTTTGCATCTATTACCCAAGCCAAGATAATAGAGTAACCTGTAATATATGCCTAAAACAAGCTTGTGCTGAATGTATAAAAGCAAATAAACAAAAATGGAGAAAAGAGATAGAATTAGAATCAGATGAAAGGATATTATCTAGTAGAGTACAAGTTTTAGAAAACAGAATAAATAAACTAGAAGTAGAACTAGAGAACCTAAAAATTAACTATGATATTAAGGCATTACCAGAAAATAAGGATATACAAAATACCGAATTTAAAGAGCAAGTGATAACATTAAAAGACAGTAATACTGCTAAAATAATTCAACTAAAAGATGCCATAACTAATTTTGGAAATAAATATATAGTAAAATTGCCTTTCAAAGAAATTTTGGGAGTAAGAATACCGGTAAAGGTAAAATTATCACCCAAGGTATCATATAAAATTTTAGCACTAGTAGACACTGGGTGTACAAAAAATATTATTCATGATAAGTACTTCATAAAATGTCCAGAGATAGTTCATACAATTGATGATAATATGGCAGAAGTCTCTACAGACATGTCCGGAATAAAGAAAATTCATAATCAGTTAGCTTATAATGTTGAAGTATACATTAACGGAACTAAATATATAATAGATGAGATTACAATAAGAAACTTATCCATGATAAGTGATGACATGATAATTGGCCTAAGGTTTTTACAACAATCGGTACAAACCACAGTAATACATGAGCTAGGAATTACTTTTATCCCATATCAAAACAATGTGCCATATATCTCAGAGGTACGAAAGCGTGGTGGAGCCAGAATC---------------AAACCCGACAACCTTGAAGCACTCAACCTTGAGTGTGAAGAAAGAATTAATGAATATGAACTTAGTGAGAATATAGACATCTATTATATATCA
>Chr04:20898187-20899771:1
AAAACATGCAGATGTTTTATATGCAACTCGCCAGATCATTTAAGTAGAACATGCCCAAATAAAGATCAAAAGAGATATTCTAGTAAATATGAAGAACAAGAGAGGGTTCTAATTATAGATAGCGTAAACGAAAACATATTAGTATGTGATGATGAAATAAAAGATGACGAATCAATATATTCTATCATAGAAACAGACGAAGTTGAAACCATCAACGAAGAATATGAATCATCCGATGAAGAGTTAGATTTAATTGACGAATTAGCAGGTCTAAAAGTTGAAATGATGGATCAATTAAATTGTGAACATGATTGGATTAGAGGAAAGGGTGACTATAATATCAAATGTGCTTTTTGCATATATTACCCAAGTCAAGAAAATAGAGTGACTTGTAGTATATATCTAAAACAAGCTTGTGCTGAATGTATAAAAGTAAATAAACAAAAATGGAGAAAAGAAATAGAATTAGAATCAGATGAAAAGACTTTATCTAGTAGAGTACGAGTGTTAGAAAATAGACTAAATAAACTAGAAGTAGAATTAGAGAACCTAAAAAATAATTGTGATATTAAGGCATTACCAGAGAATAAGGACATACAAAACACCGAATTTAAAGAGCAATTGATAACACTAAAAGACAGTAATACTGCTAAAATAATTCAACTAAGAGAGGCCATAACTAATTTTGGAAATAAATATATAGTAAGATTGCCTTTCAAAGAAATATTAGGTATAAGAATCCCTGTTAAAATAAAATTGACACCCAAAGTATCTTATAAAATATTAGCACTAGTAGACACCGGGTGTACAAAGAATATTATTCATGACAAATATTTCATAAGATGTCCTTAAATAGTTCACACAATTGACGACAATAAGGCAGAAGTTTCCACAGACATGTCTGGAATAAAGAAAATTCATAATCAGCTAGCTTATAATATTGAGGTTTACATTAATGCAACTAAATATATAATAGATGAGATTACAATAAGAGATTTGTCAATGATTAATGATGACATGATAATTGGCCTAAGGTTCCTTCAACAATCAGTACAAACCACAGTAATACATGAGCAAGGAATTACTTTTATCCCATATCAAAATAATGTTCCATATATCTCAGAGGTACGAAAGCGTGGTGGAACCTCCCCC---------------AAACTCGACAACTTAGAAGTACCTAATCTTGAGTCTGAAGAAAGAATTAATGAATATGAGCTTAGTGAGAATATAGACAACTATTATATATCA
>Chr05:18275618-18277201:1
AAAACATGCAGATGTTTTATATGCAACTCGCCAGATCATTTAAGTAGAACATGCCCAAATAAAGATCAAAAGAGATATTCTAGTAAATATGAAGAACAAGAGAGGGTTCTAATCATAGATAGCGTAAACGAAAACATATTAGTATGTGATGATGAAATAAAAGATGACGAATCAATATATTCTATCATAGAAACAGACGAAGTTGAAACCATCAACGAAGAATATGAATCATCCGAAGAAGAGTTAGATTTAATTGACGAATTAGTAGGTCTAAAGGTTGAAATGATGGATCAATTAAATTGTGAACATGATTGGATTAGAGGAAAGGGTGACTATAATATCAAATGTGCTTTTTGCATATATTACCCAAGTCAAGAAAATAGAGTGACTTGTAGTATATGTCTAAAACAAGCTTGTGCTGAATGTATAAAAGCAAATAAACAAAAATGGAGAAAAGAAATAGAATTAGAATCAGATGAAAAGACTTTAACTAGTAGAGTACGAGTGTTAGAAAATAGACTAAATAAACTAGAAGTAGAATTAGAGAACCTAAAAAATAATTGTGATATTAAGGCATAACCAGAGAATAAGGACATACAAAACATCGAATTTAAAGAGCAATTGATAACACTAAAAGACAGTAATACTGCTAAAATAATTCAACTAAGAGAGGCCATAACTAATTTTGGAAATAAATATATAGTAAGATTGCCTTTCAAAGAAATATTAGGTATAAGAATTCCTGTTAAAATAAAATTGACACCCAAAGTATCTTATAAAGTATTAGCACTAGTAGACACCGGGTGTAGAAAGAATATTATTCATGACAAATATTTCATAAGATGTCCTGAAATAGTTCACACAATTGACGACAATAAGGCAGAAGTTTCCACAGACATGTCCGGAATAAAGAAAATTCATAATCAGTTAGCTTATAATATTGAGGTTTACATTAATGCAACTAAATATATAATAGATGAGATTACAATAAGAGATTTGTCAATGATTAATGATGACATGATAATTGGCATAAGGTTCCTTCAACAATCAGTACAAACCACAGTAATACATGAGCAAGGAATTACTTTTATCCCATATCAAAATAATGTTCCATATATCTCAGAGGTACGAAAGCGTGGTGGAACCTCCCCC---------------AAACTCGACAACTTAGAAGTACCTAATCTTGAGTCTAAAGAAAGAATTAATGAATATGAGCTTAGTGAGAATATAGACAACTATTATATATCA
>Chr05:18278727-18280310:-1
AAAACATGCAGATGTTTTATATGCAACTCGCCAGATCATTTAAGTAGAACATGCCCAAATAAAGATCAAAAGAGATATTCTAGTAAATATGAAGAACAAGAGAGGGTTCTAATTATAGATAGCGTAAACGAAAACATATTAGTATGTGATGATGAAATAAAAGATGACGAATCAATATATTCTATCATAGAAACAGACGAAGTTGAAACCATCAACGAAGAATATGAATCATCCGATGAAGAGTTAGATTTAATTGACGAATTAGCAGGTCTAAAGGTTGAAATGATGGATCAATTAAATTGTGAACATGATTGGATTAGAGGAAAGGGTGACTATAATATCAAATGTGCTTTTTGCATATATTACCCAAGTCAAGAAAATAGAGTGACTTGTAGTATATGTCTAAAACAAGCTTGTGCTGAATGTATAAAAGTAAATAAACAAAAATGGAGAAAAGAAATAGAATTAGAATCAGATGAAAAGACTTTATCTAGTAGAGTACGAGTGTTAGAAAATAGACTAAATAAACTACAAGTAGAATTAGAGAACCTAAAAAATAATTGTGATATTAAGGCATTACCAGACAATAAGGACATACAAAACACCGAATTTAAAGAGCAATTGATAACACTAAAAGACAGTAATACTGCTAAAATAATTCAACTAAGAGAGGCCATAACTAATTTTGGAAATAAATATATAGTAAGATTGCCTTTCAAAGAAATATTAGGTATAAGAATCCCTGTTAAAATAAAATTGACACCCAAAGTATCTTATAAAATATTAGCACTAGTAGACACCGGGTGTACAAAGAATATTATTCATGACAAATATTTCATAAGATGTCCTGAAATAGTTCACACAATTGACGACAATAAGGCAGAAGTTTCCACAGACATGTCCGGAATAAAGAAAATTCATAATCAGTTAGCTTATAATATTGAGGTTTACATTAACGCAACTAAATATATAATAGATGAGATTACAATAAGAGATTTGTCAATGATTAATGATGACATGATAATTGGCCTAAGGTTCCTTCAACAATCAGTACAAACCACAGTAATACATGAGCAAGGAATTACTTTTATCCCATATCAAAATAATGTTCCATATATCTCAGAGGTACGAAAGCGTGGTGGAACCTCCACT---------------AAACTCGACAACTTAGAAGTACCTAATCTTGAGTCTGAAGAAAGAATTAATGAATATGAGCTTAGTGAGAATATAGACAACTATTATATATCA
>Chr05:19059288-19060872:-1
AAAACATGCAGATGTTTTATATGCAACTCGCCAGATCATTTAAGTAGAACATGCCCAAATAAAGATCAAAAGAGATATTCTAGTAAATATGAAGAACAAGAGAGGGTTCTAATTATAGATAGCGTAAACGAAAACATATTAGTATGTGATGATGAAATAAAAGATGACGAATCAATATATTCTATCATAGAAACAGACGAAGTTGAAACCATCAACGAAGAATATGAATCATCCGATGAAGAGTTAGATTTAATTGACGAATTAGCAGGTCTAAAAGTTGAAATGATGGATCAATTAAATTGTGAACATGATTGGATTAGAGGAAAGGGTGACTATAATATCAAATGTGCTTTTTGCATATATTACCCAAGTCAAGAAAATAGAGTGACTTGTAGTATATGTCTAAAACAAGCTTGTGCTGAATGTATAAAAGTAAATAAACAAAAATGGAGAAAAGAAATAGAATTAGAATCAGATGAAAAGACTTTATCTAGTAGAGTACGAGTGTTAGAAAATAGACTAAATAAACTAGAAGTAGAATTAGAGAACCTAAAAAATAATTGTGATATTAAGGCATTACCAGAGAATAAGGACATACAAAACACCGAATTTAAAGAGCAATTGATAACACTAAAAGACAGTAATACTGCTAAAATAATTCAACTAAGAGAGGCCATAACTAATTTTGGAAATAAATATATAGTAAGATTGCCTTTCAAAGAAATATTAGGTATAAGAATCCCTGTTAAAATAAAATTGACACCCAAAGTATCTTATAAAATATTAGCACTAGTAGACACCGGGTGTACAAAGAATATTATTCATGACAAATATTTTATAAGATGTCCTAAAATAGTTCACACAATTGACGACAATAAGGCAGAAGTTTCCACAGACATGTCCGGAATAAAGAAAATTCATAATCAGTTAGCTTATAATATTGAGGTTTACATTAATGCAACTAAATATATAATAGATGAGATTACAATAAGAGATTTATCAATGATTAATGATGACATGATAATTGGCCTAAGGTTCCTTCAACAATCAGTACAAACCACAGTAATACATGAGCAAGGAATTACTTTTATCCCATATCAAAATAATGTTCCATATATCTCAGAGGTACGAAAGCGTGGTGGAACCTCCCCC---------------AAACTCGACAACTTAGAAGTACCTAATCTTGAGTCTGAAGAAAGAATTAATGAATATGAGCTTAGTGAGAATATAGACAACTATTATATATCA
>Chr06:1708815-1710112:-1
AAAACATGCAGATGTTTTATATGCAACTCGCCAGATCATTTAAGTAGAACATGCCCAAATAAAGATCAAAAGAGATATTCTAGTAAATATGAAGAACAAGAGAGGGTTCTAATTATAGATAGCGTAAACGAAAACATATTAGTATGTGATGATGAAATAAAAGATGACGAATCAATATATTCTATCATAGAAACAGACGAAGTTGAAACCATCAACGAAGAATATGAATCATCCGATGAAGAGTTAGATTTAATTGACGAATTAGCAGGTCTAAAAGTTGAAATGATGGATCAATTAAATTGTGAACATGATTGGATTAGAGGAAAGGGTGACTATAATATCAAATGTGCTTTTTGCATATATTACCCAAGTCAAGAAAATAGAGTGACTTGTAGTATATGTCTAAAACAAGCTTGTGCTGAATGTATAAAAGTAAATAAACAAAAATGGAGAAAAGAAATAGAATTAGAATCAGATGAAAAGACTTTATCTAGTAGAGTACGAGTGTTAGAAAATAGACTAAATAAACTAGAAGTAGAATTAGAGAACCTAAAAAATAATTGTGATATTAAGGCATTACCAGAGAATAAGGACATACAAAACACCGAATTTAAAGAGCAATTGATAACACTAAAAGACAGTAATACTGCTAAAATAATTCAACTAAGAAAGGCCATAACTAATTTTGGAAATAAATATATAGTAAGATTGCCTTTCAAAGAAATATTAGGTATAAGAATCCCTGTTAAAATAAAATTGACACCCAAAGTATCTTATAAAATATTAGCACTAGTAGACACCGGGTGTACAAAGAATATTATTCATGACAAATATTTCATAAGATGTCCTGAAATAGTTCACACAATTGACGACAATAAGGCAGAAGTTTCCACAGACATGTCCGGAATAAAGAAAATTCATAATCAGTTAGCTTATAATATTGAGGTTTACATTAATGCAACTAAATATATAATAGATGAGATTACAATAAGAGATTTGTCAATGATTAATGATGACATGATAATTGGCCTAAGGTTCCTTCAACAATCAGTACAAACCACAGTAATACATGAGCAAGGAATTACTTTTATCCCATATCAAAATAATGTTCCATATATCTCAGATGTACGAAAGCGTGGTGGAACCTCCCCC---------------AAACTCGACAACTTAGAAGTACCTAATCTTGAGTCTGAAGAAAGAATTAATGAATATGAGCTTAGTGAGAATATAGACAACTATTACATATCA
>Chr06:4979311-4980895:-1
AAAACATGCAGATGTTTTATATGCAACTCGCCAGATCATTTAAGTAGAACATGCCCAAATAAAGATCAAAAGAGATATTCTAGTAAATATGAAGAACAAGAGAGGGTTCTAATTATAGATAGCGTAAACGAAAACATATTAGTATGTGATGATGAAATAAAAGATGACGAATCAATATATTCTATCATAGAAACAGACGAAGTTGAAACTATCAACGAAGAATATGAATCATCCGATGAAGAGTTAGATTTAATTGACGAATTAGTAGGTCTAAAGGTTGAAATGATGGATCAATTAAATTGTGAACATGATTGGATTAGAGGTAAGGGTGACTATAATATCAAATGTGCTTTTTGCATCTATTACCCTAGTCAAGAAAATAGAGTGACTTGTAGTATATGTCTAAAACAAGCTTGTGCTGAATGTATAAAAGCAAATAAACAAAAATGGAGAAAAGAAATAGAATTAGAATCAGATGAAAAGACTTTATCTAGTAGAGTACGAGTGTTAGAAAATAGACTAAATAAACTCGAAGTAGAATTAGAGAACCTAAAAAATAATTGCGATATTAAGGCATTACCAGAGAATAAGGACATACAAAACACCGAATTTAAAGAGCAATTGATAACATTAAAAGACAGTAATACTGCTAAAATAATTCAACTAAGAGAGGCCATAACTAATTTTGGAAAAAAATATATAGTAAGATTGCCTTTCAAAGAAATATTAGGTATAAGAATCCCTGTTAAAATAAAATTGACACCCAAAGTATCTTATAAAATATTAGCACTAGTAGACACAGGGTGTACAAAGAATATTATTCATGACAAATATTTCATAAGATGTCCTGAAATAGTTCACACAATTGACGACAATAAGGCAGAAGTTTCCACAGACATGTCCGGAATAAAGAAAATTCATAATCAGTTAGCTTATAATATGGAGGTTTACATTAATGCAACTAAATATATAATAGATGAGATTACAATAAGAGATTTGTCAATGATTAATGATGACATGATAATTGGCCTAAGGTTCCTTCAACAATCAGTACAAACCACAGTAATACATGAGCAAGGAATTACTTTTATCCCATATCAAAATAATGTTCCATATATCTCAGAGGTACGAAAGCGTGGTGGAGTCTCCCCC---------------AAACTCGACAACTTAGAAGTACCCAATCTTGAGCCTGAAGAAAGAATTAATGAATATGAGCTTAGTGAGAATATAGACAACTATTATATATCA
>Chr06:10576689-10578278:1
AAGACATGCAGATGTTTCATATGTAATTCACCAGATCATTTAAGTAGAACTTGCCCAAATAAAGATCAAAAAAGATATTCTAGTAAATATGAAGAACAAGAGAGAGTTTTAATTATAGATAGCGTAAATGAAAATATATTAGTATGTGACGATGAAATAAAAGATGACGAATCAATATATTCTATCATAGAAACAGATGAAATTGAAAACACCATTGAAGAGTATGAATCAACCGATGAAGAGTTAGATTTAATTGACGAACTAACCGGTTTAAAAATAGAAATGATGGATCAGTTAAATTGTGAACATGATTGGATTAGAGGAAAAGGAGATTATAACATTAAATGTGCTTTTTGCATCTATTACCCAAGCCAAGATAATAGAGTAACCTGTAGTATATGCTTAAAACAAGCTTGTGCTGAATGTATAAAAGCAAATAAACAAAAATGGAGAAAAGAGATAGAATTAGAATCAGATGAAAGGATATTATCTAGTAGAGTACGAGTTTTAGAAAACAGAATAAATAAACTAGAAGTAGAACTAGAGAACCTAAAAATTAACTATGATATTAAGGCATTACCAGAAAATAAAGATATACAAAATACCGAATTTAAAGAGCAAGTGATAACATTAAAAGACAGTAATACTGCTAAAATAATTCAACTAAAAGATGCCATAACTAATTTTGGAAATAAATATATAGTAAAATTGCCTTTCAAAGAAATTTTGGGAATAAGAATACCGGTAAAAGTAAAACTATCACCCAAGGTATCATATAAAATTCTAGCACTAGTAGACACTGGGTGTACAAAAAATATTATTCATGATAAGTACTTTATAAAATGTCCAGAGATAGTTCATACAATTGATGATAATAAGGCAGAAGTCTCTACAGACATGTCCGGAATAAAGAAAATTCATAATCAGTTAGCTCATAATGTTGAAGTATACATTAATGGAACTAAATATATAATAGATGAGATTACAATAAGAAACTTATCTATGATAAGTGATGACATGATAATTGGCCTAAGGTTTTTACAACAATCGGTACAAACCACAGTAATACATGAGCAGGGAATTACTTTTATTCCATATCAAAACAATGTGCCATATATCTCAGAGGTACGAAAGCGTGGTGGAGCCAGAGCC---------AGAATCAAACTCGACAACCTTGAAGCACTTAACCTTGAGTCTGAAGAAAGAATTAATGAATATGAACTTAGTGAGAATATAGACATCTATTATATATCA
>Chr06:12693628-12695212:1
AAGACATGCAGATGTTTCATATGTAATTCTCCAGATCATTTAAGTAGAACTTGCCCAAATAAAGATCAAAAAAGATATTCTAGTAAATATGAAGAACAAGAGAGAGTTTTAATTATAGATAGCGTAAATGAAAATATATTAGTATGTGATGATGAAATAAAAGATGACGAATCAATATATTCTATCATAGAAACAGATGAAATTGAAAACACCAATGAAGAGTATGAATCAACCAATGAAGAGTTAGATTTAATTGACGAACTAGCCGGTTTAAAAATAGAAACGATGGATTAGTTAAATTGTGAACATGATTGGATTAGAGGAAAAGGAGATTATAACATTAAATGTGCTTTTTGCATCTATTACCCAAGCCAAGATAATAGAGTAACCTGTAGTATATGCTTAAAACAAGCTTGTGTTGAATGTATAAAAGCAAATAAACAAAAATGGAGAAAAGAGATAGAATTAGAATCAGATGAAAGGATATTATCTAGTAGAGTACGAGTTTTAGAAAACAGAATAAATAAACTAGAAGTAGAACTAGAGAACCTAAAAATTAACTATGATATTAAGGCATTACCAGAAAATAAGGATATACAAAATACCGAATTTAAAGAGCAAGTGATAACATTAAAAGACAGTAATACTGCTAAAATAATTCAACTAAAAGATGCCATAACTAATTTTGGAAATAAATATATAGTAAAATTGCCTTTCAAAGAAATTTTGGGAATAAGAATACCGGTAAAAGTAAAACTATCACCGAAGGTATTATATAAAATTCTAGCACTAGTAGACACTGGGTGTATAAAAAATATTATTCATGATAAGTACTTCATAAAATGTTCAGAGATAGTTCATACAATTGATGATAATAAGGCAGAAGTCTCTACAGACATGTCCGGAATAAAGAAAATTCATAATCAGTTAGCTCGTAATATTGAAGTATACATTAATGGAACTAAATATATAATAGATGAGATTACAATAAGAAACTTATCCATGATAAGTGATGACATGATAATTGGCCTAAGGTTTTTACAATAATCAGTACAAACCACAGTAATACATGAGCAGGGAATTACTTTTATCCCATATCAAAACAATGTGCCATATATCTCAGAGGTACGAAAGCGTGGTGGAGCCAGAATC---------------AAACCTGACAACCTTGAAGCACTCAACCTTGAGTCTGAAGAAAGAATTAATGAATATGAACTTAGTGAGAATATAGACATCTATTATATATCA
>Chr07:2817836-2819420:1
AAAACATGCAGATGTTTTATATGCAACTCGCCAGATCATTTAAGTAGAACATGCCCAAATAAAGATCAAAAGAGATATTCTAGTAAATATGAAGAACAAGAGAGGGTTCTAATTATAGATAGCGTAAATGAAAACATATTAGTATGTGATGATGAAATAAAAGATGACGAGTCAATATATTCTATCATAGAAACAGACGAAGTTGAAACCATCAACGAAGAATATGAATCATCCGATGAAGAGTTAGATTTAATTGACGAATTAGCAGGTTTAAAGGTTGAAATGATGGATCAATTAAATTGTGGACATGATTGGATTAGAGGAAAGGGTGACTATAATATCAAATGTGCTTTTTGCATATATTACCCTAGTCAAGAAAATAGAGTGACTTGTAGTATATGTCTAAAACAAGCTTGTGCTGAATGTATAAAAGCAAATAAACAAAAATGGAGAAAAGAGATAGAATTAAAATCAGATGAAAAGATTTTATCTAGTAGAGTACGAGTGTTAGAAAATAGACTAAATAAATTAGAAGTAGAATTAGAGAACCTAAAAAATAATTGTGATATTAAAGCATTACCAGAAAATAAGGACATACAAAACACCGAATTTAAAGAGCAATTGATAACACTAAAAGACAGTAGTACTGCTAAAATAATTCAACTAAGAGATGCCATAACTAATTTTGGAAATAAATATATAGTAAGATTGCCTTTCAAAGAAATATTAGGTATAAGAATCCCTGTTAAAGTAAAATTGACACCCAAAGTATCTTATAAAATATTAGCACTAGTAGACACTGGGTGTACAAAGAATATTATTCATGACAAATATTTCACAAGATGTCCTGAAATAGTTCACACAATTGACGACAATAAGGCAGAAGTTTCCACAGACATGTCCGGAATAAAGAAAATTCATAATCAGTTAGCTTATAATATGGAGGTTTACATTAATGCAACTAAATATATAATAGATGAGATTACAATAAGAGATTTGTCAATGATTAATGATGACATGATAATTGGCCTAAGGTTCCTTCAACAATCAGTACAAACCACAGTAATACATGAGCAAGGAATTACTTTTATCCCATATCAAAATAATGTTCCATATATCTCAGAGGTACGAAAGCGTGGTGGAATCTCCCCC---------------AAACTCGACAACTTAGAAGTACCTAATCTTGAGTCTGAAGAAAGAATTAATGAATATGAGCTTAGTGAGAATATAGACAACTATTATATATCA
>Chr07:6684276-6685851:-1
AAAACATGTAGATGTTTTATATGCAACTCGCCAGATCATTTAAGTAGAACATGCCCAAATAAAGATCAAAAGAGATATTCTAGTAAATATGAAGAACAAGAGAGGGTTCTAATCATAGATAGCGTAAACGAAAACATATTAGTATGTGATGATGAAATAAAAGATGACGAATCAATATATTCTATCATAGAAACAGACGAAGTTGAAACCATCAACGAAGAATATGAATCATCCGATGAAGAGTTAGATTTAATTAACGAATTAGTAGGTCTAAAGGTTGAAATGATGGATCAATTAAATTGTGAACATGATTGGATTAGAGGAAAGGGTGACTATAATATCAAATGTTCTTTTTGCATATATTACCCAAGTCAAGAAAATAGAGTGACTTGTAGTATATGTCTAAAACAAGCTTGTGCTGAATGTATAAAAGCAAATAAACAAAAATGGAGAAAAGAAATAGAATTAGAATCAGATGAAAAGACTTTATCTAGTAGAGTACGGGTGTTACAAAATAGACTAAATAAACTAGAAGTAGAATTAGAGAACCTAAAAAATAATTGTGATATTAAGGCATTACCAGAGAATAAGGACATACAAAACACCGAATTTAAAGAGCAATTGATAACACTAAAAGACAG--------CTAAAATAATTCAACTAAGAGAGGCCATAACTAATTTTGGAAATAAATATATAGTAAGATTGCCTTTCAAAGAAATATTAGGTATAAGAATCCCTGTTAAAATAAAATTGACACCCAAAGTATCTTATAAAGTATTAGCACTAGTAGACACCGGGTGTACAAAGAATATTATTCATGACAAATATTTCATAAGATGTCCTGAAATAGTTCACACAATTGACGACAATAAGGCAGAAGTTTCCACAGACATGTCCGGAATAAAGAAAATTCATAATCAGTTAGCTTATAATATTGAGGTTTACATTAATGCAACTAAATATATAATAGATGAGATTACAATAAGAGATTTGTCAATGATTAATGATGACATGATAATTGGCCTAAGGTTCCTTCAACAATCAGTACAAACCACAGTAATACATGAGCAAGGAATTACTTTTATCCCATATCAAAATAATGTTCCATATATCTCAGAGGTACGAAAGCGTGGTGGAACCTCCCCC---------------AAACTCGACAACTTAGAAGTACCTAATCTTGAGTCTGAAGAAAGAATTAATGAATATGAGCTTAGTGAGAATATAGACAACTATTATATATCA
>Chr07:18554393-18555976:-1
AAGACATGCAGATGTTTCATATGTAATTCACCAGATCATTTAAGTAGAACTTGCCCAAATAAAGATCAAAAAAGATATTCTAGTAAATATGAAGAACAATAGAGAGTTTTAATTATAGATAGCATAAATGAAAATATATTAGTATGTGACGATGAAATAAAAGATGACGAATCAATATATTATATCATAGAAACAGATGAAATTGAAAACACCAATGAAGAGTATGAATCAACCGATGAAGAGTTAAATTTAATTGACGAACTAGCCAGTTTAAAAATAGAAATGATGGATCAGTTAAATTGTGAACATGATTGGATTAGAGGAAAAGGAGATTATAACATTAAATGTGCTTTTTGCATCTATTACCCAAGCCAAGATAATAGAGTAACCTGTAGTATATGCTTAAAACAAGCTTGTGCTGAATGTATAAAAGCAAATAAACAAAAATGGAGAAAAGAGATAGAATTAGAATCAGATGAAAGGATATTATCTAGTAGAGTACGAGTTTTAGAAAACAGAATAAATAAACTAGAAGTAGAACTAGAGAACCTAAAAATTAACTATGATATTAAGGCATTACCAGAAAATAAGGATATACAAAATACCGAATTTAAAGAGCAAGTGATAACATTAAAAGACAGTAATACTGCTAAAATAATTCAACTAAAAGATGCCATAACTAATTTTGGAAATAAATATATAGTAAAATTGCCTTTCAAAGAAATTTTGGGAATAAGAATACCGGTAAAAGTAAAACTATCACCCAAGGTATCATATAAAATTCTAGCACTAGTAGACACTGGGTGTACAAAAAATATTATTCATGATAAGTACTTTATAAAATGTCCAGAGATAGTTCATACAATTGATGATAATAAGGCAGAAGTCTCTACAGACATGTCCGGAATAAAGAAAATTCATAATCAGTTAGCTCATAATGTTGAAGTATACATTAATGGAACTAAATATATAATAGATGAGATTACAATAAGAAACTTATCCATGATAAGTGATGACATGATAATTGGCCTAAGGTTTTTACAACAATCGGTACAAACCACAGTAATACATGAGCAGGGAATTACTTTTATTCCATATCAAAACAATGTACCATATATCTCAGAGGTACGAAAGCGTGGTGGAGCCAGAATC---------------AAACCCGACAACCTTGAAGCACTTAACCTTGAGTCTGAAGAAAGAATTAATGAATATGAACTTAGTGAGAATATAGACATCTATTATATATCA
>Chr08:4248062-4249557:-1
AAAACATGCAGATGTTTTATATGCAACTCGCCAGATCATTTAAGTAGAACATGCCCAAATAAAAATCAAAAGAGATATTCTAGTAAATATGAAGAACAAGAGAGGGTTCTAATTATAGATAGCGTAAACGAAAACATATTAGTATGTGATGATGAAATAAAAGATGACGAATCAATATATTCTATCATAGAAACAGACGAAGTTGAAACTATCAACGAAGAATATGAATCATCCGATGAAGAGTTAGATTTAATTGACGAATTAGCAGGTCTAAAGGTTGAAATGATGGATCAATTAAATTGTAAACATGATTGGATTAGAGGAAAGGGTGACTATAATATCAAATGTGCTTTTTGCATATATTACCCTAGTCAAGAAAATAGAGTGACTTGTAGTATATGTCTAAAACAAGCTTGTGCTGAATGTATAAAAGCAAATAAACAAAAATGGAGAAAAGAAATAGAATTAGAATCAGATGAAAAGACTTTATCTAGTAGAGTACGAGTGTTAGAAAATAGACTAAATAAACTAGAAGTAGAATTAGAGAACCTAAAAAATAATTGCGATATTAAGGCATTACCAGAGAATAAGGACATACAAAACACCGAATTTAAAGAGCAATTGATAACATTAAAAGACAGTAATACTGCTAAAATAATTCAACTAAGAGAGGCCATAACTAATTTTGGAAAAAAATATATAGTAAGATTGCCTTTCAAAGAAATATTAGGTATAAGAATCCCTGTTAAAATAAAATTGACACCCAAAGTATCTTATAAAATATTAGCACTAGTAGACACCGGGTGTAAAAAGAATATTATTCATGACAAATATTTCATAAGATGTCCTGAAATAGTTCACACAATTGACGACAATAAGGCAGAAGTTTCCACAGACATGTCCGGAATAAAGAAAATTCATAATCAGTTAGCTTATAATATGGAGGTTTACATTAATGCAACTAAATATATAATAGATGAGATTACAATAAGAGATTTGTCAATGATTAATGATGACATAATAATTGGCCTAAGGTTCCTTCAACAATCAGTACAAACCACAGTAATACATGAGCAAGGAATTACTTTTATCCCATATCAAAATAATGTTCCATATATCTCAGAGGTACGAAAGCGTGGTGGAGTCTCCCCC---------------AAACTCGACAACTTAGAAGTACCCAATCTTGAGCCTAAAGAAAGAATTAATGAATATGAGCTTAGTGAGAATATAGACAACTATTATATATCA
>Chr08:11159360-11160943:-1
AAGACATGCAGATGTTTCATATGTAATTCACCAGATCATTTAAGTAGAACTTGCCCAAATAAAGATCAAAAAAGATATTCTAGTAAATATGAAGAACAAGAGAGAGTTTTAATTATAGATAGCGTAAATGAAAATATATTAGTATGTGATGATGAAATAAAAGATGACGAATCAATATATTCTATCATAGAAACAGATGAAATTGAAAACACCAATGAAGAGTATGAATCAACCGATGAAGAGTTAGATTTAATTGACGAACTAGCCGGTTTAAAAATAGAATTGATGGATCAGTTAAATTGTGAACATGATTGGATTAGAGGAAAAGGAGATTATAACATTAAATGTGCTTTTTGCATCTATTACCCAAGCCAAGATAATAGAGTAACCTGTAGTATATGCTTAAAACAAGCTTGTGCTGAATGTATAAAAGCAAATAAACAAAAATGGAGAAAAGAGATAGAATTAGAATCAGATGAAAGGATATTATCTAGTAGAGTATGAGTTTTAGAAAACAGAATAAATAAACTAGAAGTGGAACTAGAGAATCTAGAAATTAACTATGATATTAAGGCATTACCAGAAAATAAGGATATACAAAATACCGAATTTAAAGAGCAAGTGATAACATTAAAAGACAGTAATACTGCTAAAATAATTCAACTAAAAGATGCCATAACTAATTTTGGAAATAAATATATAGTAAAACTGCCTTTCAAAGAAATTTTGGGAATAAGAATACCGGTAAAAGTAAAACTATCACCCAAGGTATCATATAAAATTCTAGCACTAGTAGACACTGGGTGTACAAAAAATATTATTCATGATAAGTACTTCATAAAATGTCCAGAAATAGTTCATACAATTGATGATAATAAGGCAGAAGTCTTTACAGACATGTCCGGAATAAAGAAAATTCATAATCAGCTAGCTCATAATGTTGAAGTATACATTAATGGAACTAAATATATAATAGATGAGATTACAATAAGAAACTTATCCATGATAAGTGATGACATGATAATTGGCCTAAGGTTTTTACAACAATCGGTACAAACCACAGTAATACATGAGCAAGGAATTACTTTTATCCCATATCAAAACAATGTGCCATATATCTCAGAGGTACGAAAGCGTGGTGGAGCCAGAATC---------------AAACCCGACAACCTTGAAGCACTCAACCTTGAGTCTGAAGAAAGAATTAATGAATATGAACTTAGTGAGAATATAGACATCTATTATATATCA
>Chr08:11166707-11168290:1
AAGACATGCAGATGTTTCATATGTAATTCACCAGATCATTTAAGTAGAACTTGCCCAAATAAAGATCAAAAAAGATATTCCAGTAAATATGAAGAACAAGAGAGAGTTTTAATTATAGATAGCGTAAACGAAAACATATTAGTATGTGATGATGAAATAAAAGATGACGAGTCAATATATTCTATCATAGAAACAGACGAAGTTGAAACCATCAACGAAGAATATGAATCATCCGATGAAGAGTTAGATTTAATTGACGAATTAGCAGGTTTAAAGGTTGAAATGATGGATCAATTAAATTGTGAACATGATTGGATTAAAGGAAAGGGTGACTATAATATCAAATGTGCTTTTTGCATATATTATCCAAGTCAAGAAAATAGAGTGACTTGTAGTATATGTCTAAAACAAGCTTGTGCTGAATGTATAAAAGCAAATAAACAAAAATGGAGAAAAGAAATAGAATTAGAATCAGATGAAAAGACTTTATCTAGTAGAGTACGAGTGTTAGAAAATAGACTAAATAAACTAGAAGTAGAATTAGAGAACCTAAAAAATAATTGCGATATTAAGGCACTACCAGAGAATAAGGACATACAAAACACCGAATTTAAAGAGCAATTGATAACATTAAAAGACAGTAATACTGCTAAAATAATTCAACTAAGAGATGCCATAACTAATTTTGGAAATAAATATATAGTAAGATTGCCTTTCAAAGAAATATTAGGTATAAGAATCCCTGTTAAAATAAAATTGACACCCAAAGTATCTTATAAAATATTAGCACTAGTAGACACTGGGTGTACAAAGAATATTATTCATGACAAATATTTCACAAGATGTCCTGAAATAGTTCACACAATTGACGACAATAAGGCAGAAGTTTCCACAGACATGTCCGGAATAAAGAAAATTCATAATCAGTTAGCTTATAATATGGAGGTTTACATTAATGCAACTAAATATATAATAGACGAGATTACAATAAGAAACTTATCCATGATAAGTGATGACATGATAATTGGCCTAAGGTTTTTACAACAATCGGTACAAACCACAGTAATACATGAGCAAGGAATTACTTTTATCCCATATCAAAATAATATTCCATATATTTCAGAGGTACGAAAGCGTGGTGGAATCTCCCCC---------------AAACTCGACAACTTAGAAGTACCCAATCTCGAGCCTGAAGAAAGAATTAATGAATATGAGCTTAGTAAGAATATAGACAACTATTATATATCA
>Chr08:11263816-11265400:1
AAAACATGCAGATGTTTTATATGCAACTCGCCAGATCATTTAAGTAGAACATGCCCAAATAAAGATCAAAAAAGATATTCTAGTAAATATGAAGAACAAGAGAGAGTTTTAATTATAGATAGCGTAAATGAAAATATATTAGTATGTGATGATGAAATAAAAGATGACGAATCAATATATTCTATCATAGAAACAGATGAAATTGAAAACACCAATGAAGAGTATGAATCAACCGATGAAGAGTTAGATTTAATTGACGAACTAGCCGGTTTAAAAATAGAATTGATGGATCAGTTAAATTGTGAACATGATTGGATTAGAGGAAAAGGAGATTATAACATTAAATGTGCTTTTTGCATCTATTACCCAAGCCAAGATAATAGAGTAACCTGTAGTATATGCTTAAAACAAGCTTGTGCTGAATGTATAAAAGCAAATAAACAAAAATGGAGAAAAGAGATAGAATTAGAATCAGATGAAAGGATATTATCTAGTAGAGTACGAGTTTTAGAAAACAGAATAAATAAACTAGAAGTAGAATTAGAGAACCTAAAAAATAATTGCGATATTAAGGCATTACCAGAGAATAAGGACATACAAAATACCGAATTTAAAGAGCAATTGATAACATTAAAAGACAGTAATACTGCTAAAATAATTCAACTAAGAGATGCCATAACTAATTTTGGAAATAAATATATAGTAAGATTGCCTTTCAAAGAAATATTAGGTATAAGAATTCCTGTTAAAATAAAATTGACACCCAAAGTATCTTATAAAATATTAGCACTAGTAGACACTGGGTGTACAAAGAATATTATTCATGACAAATATTTCACAAGATGTCCTGAAATAGTTCACACAATTGACGACAATAAGGCAGAAGTTTCCACAGACATGTCCGGAATAAAGAAAATTCATAATCAGTTAGCTTATAATATGGAGGTTTACATTAATGCAACTAAATATATAATAGACGAGATTACAATAAGAAACTTATCCATGATAAGTGATGACATGATAATTGGCCTAAGGTTTTTACAACAATCGGTACAAACCACAGTAATACATGAGCAAGGAATTACTTTTATCCCATATCAAAATAATATTCCATATATTTCAGAGGTACGAAAGCGTGGTGGAATCTCCCCC---------------AAACTCGACAACTTAGAAGTACCCAATCTCGAGCCTGAAGAAAGAATTAATGAATATGAGCTTAGTAAGAATATAGACAACTATTATATATCA
>Chr08:11270810-11272070:1
AAAACATGCAGATGTTTTATATGCAACTCGCCAGATCATTTAAGTAGAACATGCCCAAATAAAGATCAAAAGAGATATTCTAGTAAATATGAAGAACAAGAGAGGGTTCTAATTATAGATAGCGTAAATGAAAATATATTAGTATGTGATGATGAAATAAAAGATGACGAGTCAATATATTCTATCATAGAAACAGACGAAGTTGAAACCATCAACGAAGAATATGAATCATCCGATGAAGAGTTAGATTTAATTGACGAATTAGCAGGTTTAAAGGTTGAAATGATGGATCAATTAAATTGTGAACATGATTGGATTAGAGGAAAGGGTGACTATAATATCAAATGTGCTTTTTGCATATATTATCCAAGTCAAGAAAATAGAGTGACTTGTAGTATATGTCTAAAACAAGCTTGTGCTGAATGTATAAAAGCAAATAAACAAAAATGGAGAAAAGAAATAGAATTAGAATCAGATGAAAAGACTTTATCTAGTAGAGTACGAGTGTTAGAAAATAGACTAAATAAACTAGAAGTAGAATTAGAGAACCTAAAAAATAATTGCGATATTAAGGCACTACCAGAGAATAAGGACATACAAAACACCGAATTTAAAGAGCAATTGATAACATTAAAAGACAGTAATACTGTTAAAATAATTCAACTAAGAGATGCCATAACTAATTTTGGAAATAAATATATAGTAAGATTGCCTTTCAAAGAAATATTAGGTATAAGAATCCCTGTTAAAATAAAATTGACACCCAAAGTATCTTATAAAATATTAGCACTAGTAGACACTGGGTGTACAAAGAATATTATTCATGACAAATATTTCACAAGATGTCCTGAAATAGTTCACACAATTGACGACAATAAGGCAGAAGTTTCCACAGACATGTCCGGAATAAAGAAAATTCATAATCAGTTAGCTTATAATATGGAGGTTTACATTAATGCAACTAAATATATAATAGATGAGATTACAATAAGAGATTTGTCAATGATTAATGATGACATGATAATTGGCCTAAGGTTCCTTCAACAATCAGTACAAACCACAGTAATACATGAGCAAGGAATTACTTTTATCCCATATCAAAATACTGTTCCATATATCTCAGAGGTACGAAAGCGTGGTGGAACCTCCCCCTCCCCAAAACCCGACAAACTCGACAACTTAGAAGTACCCAATCTCGAGCCTGAAGAAAGAATTAATGAATATGAGCTTAGTAAGAATATAGACAACTATTCTTTCTCA
>Chr08:11278055-11279315:1
AAAACATGCAGATGTTTTATATGCAACTCGCCAGATCATTTAAGTAGAACATGCCCAAATAAAGATCAAAAGAGATATTCTAGTAAATATGAAGAACAAGAGAGGGTTCTAATTATAGATAGCGTAAATGAAAATATATTAGTATGTGATGATGAAATAAAAGATGACGAGTCAATATATTCTATCATAGAAACAGACGAAGTTGAAACCATCAACGAAGAATATGAATCATCCGATGAAGAGTTAGATTTAATTGACGAATTAGCAGGTTTAAAGGTTGAAATGATGGATCAATTAAATTGTGAACATGATTGGATTAGAGGAAAGGGTGACTATAATATCAAATGTGCTTTTTGCATATATTATCCAAGTCAAGAAAATAGAGTGACTTGTAGTATATGTCTAAAACAAGCTTGTGCTGAATGTATAAAAGCAAATAAACAAAAATGGAGAAAAGAAATAGAATTAGAATCAGATGAAAAGACTTTATCTAGTAGAGTACGAGTGTTAGAAAATAGACTAAATAAACTAGAAGTAGAATTAGAGAACCTAAAAAATAATTGCGATATTAAGGCACTACCAGAGAATAAGGACATACAAAACACCGAATTTAAAGAGCAATTGATAACATTAAAAGACAGTAATACTGCTAAAATAATTCAACTAAGAGATGCCATAACTAATTTTGGAAATAAATATATAGTAAGATTGCCTTTCAAAGAAATATTAGGTATAAGAATCCCTGTTAAAATAAAATTGACACCCAAAGTATCTTATAAAATATTAGCACTAGTAGACACTGGGTGTACAAAGAATATTATTCATGACAAATATTTCACAAGATGTCCTGAAATAGTTCACACAATTGACGACAATAAGGCAGAAGTTTCCACAGACATGTCCGGAATAAAGAAAATTCATAATCAGTTAGCTTATAATATGGAGGTTTACATTAATGCAACTAAATATATAATAGATGAGATTACAATAAGAGATTTGTCAATGATTAATGATGACATGATAATTGGCCTAAGGTTCCTTCAACAATCAGTACAAATCACAGTAATACATGAGCAAGGAATTACTTTTATCCCATATCAAAATACTGTTCCATATATCTCAGAGGTACGAAAGCGTGGTGGAACCTCCCCCTCCCCAAAACCCGACAAACTCGACAACTTAGAAGTACCCAATCTTGAGTCTGAAGAAAGAATTAATGAATATGAGCTTAGTGAGAATATAGACAACTATTCTTTCTCA
>Chr08:11285251-11286834:1
AAAACATGCAGATGTTTTATATGCAACTCGCCAGATCATTTAAGTAGAACATGCCCAAATAAAGATCAAAAAAGATATTCTAGTAAATATGAAGAACAAGAGAGAGTTTTAATTATAGATAGCGTAAATGAAAATATATTAGTATGTGATGATGAAATAAAAGATGACGAATCAATATATTCTATCATAGAAACAGATGAAATTGAAAACACCAATGAAGAGTATGAATCAACCGATGAAGAGTTAGATTTAATTGACGAACTAGCCGGTTTAAAAATAGAATTGATGGATCAGTTAAATTGTGAACATGATTGGATTAGAGGAAAGGA-GATTATAACATTAAATGTGCTTTTTGCATCTATTACCCAAGCCAAGATAATAGAGTAACCTGTAGTATATGCTTAAAACAAGCTTGTGCTGAATGTATAAAAGCAAATAAACAAAAATGGAGAAAAGAAATAGAATTAGAATCAGATGAAAAGACTTTATCTAGTAGAGTACGAGTGTTAGAAAATAGACTAAATAAATTAGAAGTAGAATTAGAGAACCTAAAAAATAATTGTGATATTAAAGCATTACCAGAAAATAAGGACATACAAAATACCGAATTTAAAGAGCAATTGATAACACTAAAAGACAGTAATACTGTTAAAATAATTCAACTAAGAGAGGCCATAACTAATTTTGGAAATAAATATATAGTAAGATTGCCTTTCAAAGAAATATTAGGTATAAGAATCCCTGTTAAAATAAAATTGACACCCAAAGTATCTTATAAAATATTAGCACTAGTAGACACTGGGTGTACAAAGAATATTATTCATGACAAATATTTCACAAGATGTCCTGAAATAGTTCACACAATTGACGACAATAAGGCAGAAGTTTCCACAGACATGTCCGGAATAAAGAAAATTCATAATCAGTTAGCTTATAATATGGAGGTTTACATTAATGCAACTAAATATATAATAGATGAAATTACAATAAGAGATTTGTCAATGATTAATGATGACATGATAATTGGCCTAAGGTTCCTTCAACAATCAGTACAAACCACAGTAATACATGAGCAAGGAATTACTTTTATCCCATATCAAAATAATATTCCATATATCTCAGAGGTCCGAAAGCGTGGTGGAATCTCCCCC---------------AAACTCGACAACTTAGAAGTACCCAATCTTGAGCCTGAAGAAAGAATTAATGAATATGAGCTTAGTGAGAATATAGATAACTATTATATATCA
>Chr08:11291753-11293337:-1
AAAACATGCAGATGTTTTATATGCAACTCGCCAGATCATTTAAGTAGAACATGCCCAAATAAAGATCAAAAAAGATATTCTAGTAAATATGAAGAACAAGAGAGAGTTTTAATTATAGATAGCGTAAATGAAAATATATTAGTATGTGATGATGAAATAAAAGATGACGAATCAATATATTCTATCATAGAAACAGATGAAATTGAAAACACCAATGAAGAGTATGAATCAACCGATGAAGAGTTAGATTTAATTGACGAATTAGCAGGTTTAAAGGTTGAAATGATGGATCAATTAAATTGTGAACATGATTGGATTAGAGGAAAGGGTGACTATAATATCAAATGTGCTTTTTGCATATATTATCCAAGTCAAGAAAATAGAGTGACTTGTAGTATATGTCTAAAACAAGCTTGTGCTGAATGTATAAAAGCAAATAAACAAAAGTGGAGAAAAGAAATAGAATTAGAATCAGATGAAAAGATTTTATCTAATAGAGTACGAGTGTTAGAAAATAGACTAAATAAATTAGAAGTAGAATTAGAGAACCTAAAAAATAATTGTGATATTAAAGCATTACCAGAAAATAAGGACATACAAAATACCGAATTTAAAGAGCAATTGATAACACTAAAAGACAGTAATACTGTTAAAATAATTCAACTAAGAGAGGCCATAACTAATTTTGGAAATAAATATATAGTAAGATTGCCTTTCAAAGAAATATTAGGTATAAGAATCCCTGTTAAAATAAAATTGACACCCAAAGTATCTTATAAAATATTAGCACTAGTAGACACTGGGTGTACAAAGAATATTATTCATGACAAATATTTCACAAGATGTCCTGAAATAGTTCACACAATTGACGACAATAAGGCAGAAGTTTCCACAGACATGTCCGGAATAAAGAAAATTCATAATCAGTTAGCTTATAATATGGAGGTTTACATTAATGCAACTAAATATATAATAGATGAGATTACAATAAGAGATTTGTCAATGATTAATGATGACATAATAATTGGCCTAAGGTTCCTTCAACAATCAGTACAAACCACAGTAATACATGAGCAAGGAATTACTTTTATCCCATATCAAAATAATATTCCATATATTTCAGAGGTACGAAAGCGTGGTGGAATCTCCCCC---------------AAACTCGACAACTTAGAAGTACCCAATCTCGAGCCTGAAGAAAGAATTAATGAATATGAGCTTAGTAAGAATATAGACAACTATTATATATCA
>Chr08:11295147-11296731:1
AAAACATGCAGATGTTTTATATGCAACTCGCCAGATCATTTAAGTAGAACATGCCCAAATAAAGATCAAAAAAGATATTCTAGTAAATATGAAGAACAAGAGAGAGTTTTAATTATAGATAGCGTAAATGAAAATATATTAGTATGTGATGATGAAATAAAAGATGACGAATCAATATATTCTATCATAGAAACAGATGAAATTGAAAACACCAATGAAGAGTATGAATCAACCGATGAAGAGTTAGATTTAATTGACGAACTAGCCGGTTTAAAAATAGAATTGATGGATCAGTTAAATTGTGAACATGATTGGATTAGAGGAAAAGGAGATTATAACATTAAATGTGCTTTTTGCATCTATTACCCAAGCCAAGATAATAGAGTAACCTGTAGTATATGCTTAAAACAAGCTTGTGCTGAATGTATAAAAGCAAATAAACAAAAATGGAGAAAAGAGATAGAATTAGAATCAGATGAAAGGATATTATCTAGTAGAGTACGAGTTTTAGAAAACAGAATAAATAAACTAGAAGTAGAATTAGAGAACCTAAAAAATAATTGCGATATTAAGGCATTACCAGAGAATAAGGACATACAAAATACCGAATTTAAAGAGCAATTGATAACATTAAAAGACAGTAATACTGCTAAAATAATTCAACTAAGAGATGCCATAACTAATTTTGGAAATAAATATATAGTAAGATTGCCTTTCAAAGAAATATTAGGTATAAGAATTCCTGTTAAAATAAAATTGACACCCAAAGTATCTTATAAAATATTAGCACTAGTAGACACTGGGTGTACAAAGAATATTATTCATGACAAATATTTCACAAGATGTCCTGAAATAGTTCACACAATTGACGACAATAAGGCAGAAGTTTCCACAGACATGTCCGGAATAAAGAAAATTCATAATCAGTTAGCTTATAATATGGAGGTTTACATTAATGCAACTAAATATATAATAGACGAGATTACAATAAGAAACTTATCCATGATAAGTGATGACATGATAATTGGCCTAAGGTTTTTACAACAATCGGTACAAACCACAGTAATACATGAGCAAGGAATTACTTTTATCCCATATCAAAATAATATTCCATATATTTCAGAGGTACGAAAGCGTGGTGGAATCTCCCCC---------------AAACTCGACAACTTAGAAGTACCCAATCTCGAGCCTGAAGAAAGAATTAATGAATATGAGCTTAGTAAGAATATAGACAACTATTATATATCA
>Chr08:11318338-11319598:1
AAAACATGCAGATGTTTTATATGCAACTCGCCAGATCATTTAAGTAGAACATGCCCAAATAAAGATCAAAAGAGATATTCTAGTAAATATGAAGAACAAGAGAGGGTTCTAATTATAGATAGCGTAAATGAAAATATATTAGTATGTGATGATGAAATAAAAGATGACGAGTCAATATATTCTATCATAGAAACAGACGAAGTTGAAACCATCAACGAAGAATATGAATCATCCGATGAAGAGTTAGATTTAATTGACGAATTAGCAGGTTTAAAGGTTGAAATGATGGATCAATTAAATTGTGAACATGATTGGATTAGAGGAAAGGGTGACTATAATATCAAATGTGCTTTTTGCATATATTATCCAAGTCAAGAAAATAGAGTGACTTGTAGTATATGTCTAAAACAAGCTTGTGCTGAATGTATAAAAGCAAATAAACAAAAATGGAGAAAAGAAATAGAATTAGAATCAGATGAAAAGACTTTATCTAGTAGAGTACGAGTGTTAGAAAATAGACTAAATAAACTAGAAGTAGAATTAGAGAACCTAAAAAATAATTGCGATATTAAGGCACTACCAGAGAATAAGGACATACAAAACACCGAATTTAAAGAGCAATTGATAACATTAAAAGACAGTAATACTGCTAAAATAATTCAACTAAGAGATGCCATAACTAATTTTGGAAATAAATATATAGTAAGATTGCCTTTCAAAGAAATATTAGGTATAAGAATCCCTGTTAAAATAAAATTGACACCCAAAGTATCTTATAAAATATTAGCACTAGTAGACACTGGGTGTACAAAGAATATTATTCATGACAAATATTTCACAAGATGTCCTGAAATAGTTCACACAATTGACGACAATAAGGCAGAAGTTTCCACAGACATGTCCGGAATAAAGAAAATTCATAATCAGTTAGCTTATAATATGGAGGTTTACATTAATGCAACTAAATATATAATAGATGAGATTACAATAAGAGATTTGTCAATGATTAATGATGACATGATAATTGGCCTAAGGTTCCTTCAACAATCAGTACAAACCACAGTAATACATGAGCAAGGAATTACTTTTATCCCATATCAAAATACTGTTCCATATATCTCAGAGGTACGAAAGCGTGGTGGAACCTCCCCCTCCCCAAAACCCGACAAACTCGACAACTTAGAAGTACCCAATCTTGAGTCTGAAGAAAGAATTAATGAATATGAGCTTAGTGAGAATATAGACAACTATTCTTTCTCA
>Chr08:11327301-11328561:-1
AAAACATGCAGATGTTTTATATGCAACTCGCCAGATCATTTAAGTAGAACATGCCCAAATAAAGATCAAAAGAGATATTCTAGTAAATATGAAGAACAAGAGAGGGTTCTAATTATAGATAGCGTAAATGAAAATATATTAGTATGTGATGATGAAATAAAAGATGACGAGTCAATATATTCTATCATAGAAACAGACGAAGTTGAAACCATCAACGAAGAATATGAATCATCCGATGAAGAGTTAGATTTAATTGACGAATTAGCAGGTTTAAAGGTTGAAATGATGGATCAATTAAATTGTGAACATGATTGGATTAAAGGAAAGGGTGACTATAATATCAAATGTGCTTTTTGCATATATTATCCAAGTCAAGAAAATAGAGTGACTTGTAGTATATGTCTAAAACAAGCTTGTGCTGAATGTATAAAAGCAAATAAACAAAAATGGAGAAAAGAAATAGAATTAGAATCAGATGAAAAGACTTTATCTAGTAGAGTACGAGTGTTAGAAAATAGACTAAATAAACTAGAAGTAGAATTAGAGAACCTAAAAAATAATTGCGATATTAAGGCACTACCAGAGAATAAGGACATACAAAACACCGAATTTAAAGAGCAATTGATAACATTAAAAGACAGTAATACTGCTAAAATAATTCAACTAAGAGATGCCATAACTAATTTTGGAAATAAATATATAGTAAGATTGCCTTTCAAAGAAATATTAGGTATAAGAATCCCTGTTAAAATAAAATTGACACCCAAAGTATCTTATAAAATATTAGCACTAGTAGACACTGGGTGTACAAAGAATATTATTCATGACAAATATTTCACAAGATGTCCTGAAATAGTTCACACAATTGACGACAATAAGGCAGAAGTTTCCACAGACATGTCCGGAATAAAGAAAATTCATAATCAGTTAGCTTATAATATGGAGGTTTACATTAATGCAACTAAATATATAATAGATGAGATTACAATAAGAGATTTGTCAATGATTAATGATGACATGATAATTGGCCTAAGGTTCCTTCAACAATCAGTACAAACCACAGTAATACATGAGCAAGGAATTACTTTTATCCCATATCAAAATACTGTTCCATATATCTCAGAGGTACGAAAGCGTGGTGGAACCTCCCCCTCCCCAAAACCCGACAAACTCGACAACTTAGAAGTACCCAATCTTGAGTCTGAAGAAAGAATTAATGAATATGAGCTTAGTGAGAATATAGACAACTATTCTTTCTCA
>Chr08:20267058-20268620:1
AAGACATGCAGATGTTTCATATGTAATTCACCAGATCATTTAAGTAGAACTTGCCCAAATAAAGATCAAAAAAGATATTCTAGTAAATATGAAGAACAAGAGAGAGTTTTAATTATAGATAGCGTAAATGAAAATATATTAGTATGTGATGATGAAATAAAAGATGATGAATCAATATATTCTATCATAGAAACAGATGAAATTGAAAACACCAATGAAGAGTATGAATCAACCGATGAAGAGTTAGATTTAATTGACGAACTAGCCGGTTTAAAAATAGAAATGATGGATCAATTAAATTGTGAACATGATTGGATTAGAGGAAAAGGAGATTATAACATTAAATGTGCTTTTTGCATCTATTACCCAAGCCAAGATAATAGAGTAACCTGTAGTATATGCTTAAAACAAGCTTGTGCTGAATGTATAAAAGCAAATAAACAAAAATGGAGAAAAGAGATAGAATTAGAATCAGATGAAAGGATATTATCTAGTAGAGTACGAGTTTTAGAAAACAGAATAAATAAACTAGAAGTAGAACTAGAGAACCTAAAAATTAACTATGATATTAAGGCATTAACAGAAAATAAGGATATACAAAATACCGAATTTAAAGAGCAAGTGATAACATTAAAAGACAGTAATATTGCTAAAATAATTCAACTAAAAGATGCCATAACTAATTTTGGAAATAAATATATAGTAAAATTGCCTTTCAAAGAAATTTTGGGAATAAGAATACCGGTAAAAGTAAAACTATCACCCAAGGTATCATATAAAATTCTAGCACTAGTAGACACTGGGTGTACAAAAAATATTATTCATGATAAGTACTTCATAAAATGTCCAGAGATAGTTCATACAATTGATGATAATAAGGCAGAAGTCCCTACAGACATGTCCGGAATAAAGAAAATTCATAATCAGTTAGCTCATAATGTTGAAGTATACATTAATGGAACTAAATATATAATAGATGAGATTACAATAAGAAACTTATCCATGATAAGTGATGACATGATAATTGGCCTAAGGTTTTTACAACAATCGGTACAAACCACAGTAATACATGAGCAGGGAATTACTTTTATCCCATATCAAAACAATGTGCCATATATCTCAGAGGTACGAAAGCGTGGTGGAGTCAGAATC---------------AAACCCGACAACCTTGAAGCACTCAACCTTGAGTCTGAAGAAAGAATTAATGAATATGAACTTAGTGAGAATATAGACATCTATTATATATCA
>Chr08:21346336-21347919:-1
AAAACATGCAGATGTTTTATATGCAACTCGCCAGATCATTTAAGTAGAACATGCCCAAATAAAGATCAAAAGAGATATTCTAGTAAATATGAAGAACAAGAGAGGGTTCTAATTATAGATAGCGTAAACGAAAACATATTAGTATGTGATGATGAAATAAAAGATGACGAATCAATATATTCTATCATAGAAACAGACAAAGTTGAAACCATCAACGAAGAATATGAATCATCCGATGAAGAGTTAGATTTAATTGACGAATTAGCAGGTCTAAAGGTTGAAATGATGGATCAATTAAATTGTGAACATGATTGGATTAGAGGAAAGGGTGACTATAATATCAAATGTGCTTTTTGCATATATTACCCAAGTCAAGAAAATAGAGTGACTTGTAGTATATGTCTAAAACAAGCTTGTGCTGAATGTATAAAAGCAAATAAACAAAAATAGAGAAAAGAAATAGAATTAGAATCAGATGAAAAGACTTTATCTAGTAGAGTACGAGTGTTAAAAAATAGACTAAATAAACTAGAAGTAGAATTAGAGAACCTAAAAAATAATTGTGATATTAAGGCATTACCAGAGAACAAGGACATACAAAACACCGAATTTAAAGAGCAATTGATAACACTAAAAGACAGTAATACTGCTAAAATAATTCAACTAAGAGAGGCCATAACTAATTTTGGAAATAAATATATAGTAAGATTGCCTTTCAAAGAAATATTAGGTATAAGAATCCCTGTTAAAATAAAATTGACACCCAAAGTATCTTATAAAATATTAGCACTAGTAGACACCGGGTGTACAAAGAATATTATTCATGACAAATATTTCATAAGATGTCCTGAAATAGTTCACACAATTGACGACAATAAGGCAGAAGTTTCCACAGACATGTCCGGAATAAAGAAAATTCATAATCAGTTAGCTTATAATATTGAGGTTTACATTAATTCAACTAAATATATAATAGATGAGATTACAATAAGAGATTTGTCAATGATTAATGATGACATGATAATTGGCCTAAGGTTCCTTCAACAATCAGTACAAACCACAGTAATACATGAGCAAGGAATTACTTTTATCCCATATCAAAATAATGTTCCATATATCTCAGAGGTACGAAAGCGTGGTGGAACCTCCCCC---------------AAACTCGACAACTTAGAAGTACCTAATCTTGAGTCTGAAGAAAGAATTAATGAATATGAGCTTAGTGAGAATATAGACAACTATTATATATCA
>Chr08:25007346-25008930:-1
AAAACATGCAGGTGTTTTATATGCAACTCGCCAGATCATTTAAGTAGAACATGCCCAAATAAAGATCAAAAGAGATATTCTAGTAAATATGAAGAACAAGAGAGGGTTCTAATTATAGATAGCGTAAACGAAAACATATTAGTTTGTGATGATGAAATAAAAGATGACGAATCAATATATTCTATCATAGAAACAGACGAAGTTGAAACTATCAACGAAGAATATGAATCATCCGATGAAGAGTTAGATTTAATTGACGAATTAGCAGGTCTAAAGGTTGAAATGATGGATCAATTAAATTGTGAACATGATTGGATTAGAGGAAAGGGTGACTATAATATCAAATGTGCTTTTTGCATATATTACCCTAGTCAAGAAAATAGAGTGACTTGTAGTATATGTCTAAAACAAGCTTGTGCTGAATGTATAAAAGCAAATAAACAAAAATGGAGAAAAGAAATAGAATTAGAATCAGATGAAAAGACTTTATCTAGTAGAGTACGAGTGTTAGAAAATAGACTAAATAAACTAGAAGTAGAATTAGAGAACCTAAAAAATAATTGCGATATTAAGGCATTACCAGAGAATAAGGACATACAAAACACCGAATTTAAAGAGCAATTGATAACATTAAAAGACAGTAATACTGCTAAAATAATTCAACTAAGAGGTGCCATAACTAATTTTGGAAATAAATATATAGTAAGATTGTCTTTCAAAGAAATATTAGGTATAAGAATCCCTGTTAAAGTAAAATTGACACCCAAAGTATCTTATAAAATATTAGCACTAGTAGACACTGGGTGTACAAAGAATATTATTCATGACAAATATTTCACAAGATGTCCTGAAATAGTTCACACAATTGACGACAATAAGGCAGAAGTTTCCACAGACATGTCCGGAATAAAGAAAATTCATAATCAGTTAGCTTATAATATGGAGGTTTACATTAATGCAACTAAATATATAATAGATGAGATTACAATAAGAGATTTGTCAATGATTAATGATGACATGATAATTGGCCTAAGGTTCCTTCAACAATCAGTACAAACCACAGTAATACATGAGCAAGGAATTACTTTTATCCCATATCAAAATAATGTTCCATATATCTCAGAGGTACGAAAGCGTGGTGGAGTCTCCCCC---------------AAACTCGACAACTTAGAAGTACCCAATCTTGAGCCTGAAGAAAGAATTAATGAATATGAGCTTAGTGAGAATATAGACAACTATTATATATCA
>Chr09:1111824-1113407:-1
AAGACATGCAGATGTTTCATATGTAATTCACCAGATCATTTAAGTAGAACTTGCCCAAATAAAGATCAAAAAAGATATTCTAGTAAATATGAAGAACAAGAGAGAGTTTTAATTATAGATAGCGTAAATGAAAATATATTAGTATGTGATGATGAAATAAAAGATGACGAATCAATATATTCTATCATAGAAACAGATGAAATTGAAAACACCAATGAAGAGTATGAATCAACCGATGAAGAGTTAGATTTAATTGACGAACTAGCCGGTTTAAAAATAGAATTGATGGATCAGTTAAATTGTGAACATGATTGGATTAGAGGAAAAGGAGATTATAACATTAAATGTGCTTTTTGCATCTATTACCCAAGCCAAGATAATAGAGTAACCTGTAGTATATGCTTAAAACAAGCTTGTGCTGAATGTATAAAAGCAAATAAACAAAAATGGAGAAAAGAGATAGAATTAGAATCAGATGAAAGGATATTATCTAGTAGAGTACGAGTTTTAGAAAACAGAATAAATAAACTAGAAGTGGAACTAGAGAATCTAAAAATTAACTATGATATTAAGGCATTACCAGAAAATAAGGATATACAAAATACCGAATTTAAAGAGCAAGTGATAACATTAAAAGACAGTAATACTGCTAAAATAATTCAACTAAAAGATGCCATAACTAATTTTGGAAATAAATATATAGTAAAACTGCCTTTCAAAGAAATTTTGGGAATAAGAATACCGGTAAAAGTAAAACTATCACCCAAGGTATCATATAAAATTCTAGCACTAGTAGACACTGGGTGTACAAAAAATATTATTCATGATAAGTACTTCATAAAATGTCCAGAAATAGTTCATACAATTGATGATAATAAGGCAGAAGTCTCTACAGACATGTCCGGAATAAAGAAAATTCATAATCAGCTAGCTCATAATGTTGAAGTATACATTAATGGAACTAAATATATAATAGATGAGATTACAATAAGAAACTTATCCATGATAAGTGATGACATGATAATTGGCCTAAGGTTTTTACAACAATCGGTACAAACCACAGTAATACATGAGCAAGGAATTACTTTTATCCCATATCAAAACAATGTGCCATATATCTCAGAGGTACGAAAGCGTGGTGGAGCCAGAATC---------------AAACCCGACAACCTTGAAGCACTCAACCTTGAGTCTGAAGAAAGAATTAATGAATATGAACTTAGTGAGAATATAGACATCTATTATATATCA
>Chr09:16870400-16871974:1
AAAACATGCAGATGTTTTATATGCAACTCGCCAGATCATTTAAGTAGAACATGCCCAAATAAAGATCAAAAGAGATATTCTAGTAAATATGAAGAACAAGAGAGGGTTCTAATTATAGATAGCGTAAATGAAAACATATTAGTATGTGATGATGAAATAAAAGATGACGAGTCAATATATTCTATCATAGAAACAGACGAAGTTGAAACCATCAACGAAGAATATGAATCATCCGATGAAGAGTTAGATTTAATTGACGAATTAGCAGGTTTAAAGGTTGAAATGATGGATCAATTAAATTGTGAACATGATTGGATTAGAGGAAAGGGTGACTATAATATCAAATGTGCTTTTTGCATATATTACCCTAGTCAAGAAAATAGAGTGACTTGTAGTATATGTCTAAAACAAGCTTGTGCTGAATGTATAAAAGCAAATAAACAAAAATGGAGAAAAGAAATAGAATTAGAATCAGATGAAAAGACATTATCTAGTAGAGTACGAGTGTTAGAAAATAGACTAAATAAACTAGAAGTAGAATTAGAGAACCTAAAAAATAATTGCGATATTAAGGCATTACCAGAGAATAAGGACATACAAAACACCGAATTTAAAGAGCAATTGATAACATTAAAAGACAGTAATACTGCTAAAATAATTCAACTAAGAGATGCCATAACTAATTTTGGAAATAAATATATAGTAAGATTGCCTTTCAAAGAAATATTAGGTATAAGAATCCCTGTTAAAGTAAAATTGACACCCAAAGTATCTTATAAAATATT----------GACACTGGGTGTACAAAGAATATTATTCATGACAAATATTTCACAAGATGTCCTAAAATAGTTCACACAATTGACGACAATAAGGCAGAAGTTTCCACAGACATGTCCGGAATAAAGAAAATTCATAATCAGTTAGCTTATAATATGGAGGTTTACATTAATGCAACTAAATATATAATAGATGAGATTACAATAAGAGATTTGTCAATGATTAATGATAACATGATAATTGGCCTAAGGTTCCTTCAACAATCAGTACAAACCACAGTAATACATGAGCAAGGAATTACTTTTATCCCATATCAAAATAATGTTCCATATATCTCAGAGGTACGAAAGCATGGTGGAGTCTCCCCC---------------AAACTCGACAACTTAGAAGTACCCAATCTTGAGCCTGAAGAAAGAATTAATGAATATGAGCTTAGTGAGAATATAGACAACTATTATATATCA
>Chr10:9820906-9822489:-1
AAAACATGCAGATGTTTTATATGCAACTCGCCAGATCATTTAAGTAGAACATGCCCAAATAAAGATCAAAAGAGATATTCTAGTAAATATGAAGAACAAGAGAGGGTTCTAATTATAGATAGCGTAAACGAAAACATATTAGTATGTGATGATGAAATAAAAGATGACGAATCAATATATTCTATCATAGAAACAGACGAAGTTGAAACCATCAACGAAGAATATGAATCATCCGATGAAGAGTTAGATTTAATTGACGAATTAGCAGGTCTAATGGTTGAAATGATGGATCAATTAAATTGTGAACATGATTGGATTAGAGGAAAGGGTGACTATAATATCAAATGTGCTTTTTGCATATATTACCCAAGTCAAGAAAATAGAGTGACTTGTAGTATATGTCTAAAACAAGCTTGTGCTGAATGTATAAAAGTAAATAAACAAAAATGGAGAAAAGAAATAGAATTAGAATCAGATGAAAAGACTTTATCTAGTAGAGTACGAGTGTTAGAAAATAGACTAAATAAATTAGAAGTAGAATTAGAGAACCTAAAAAATAATTGTGATATTAAGGCATTACCAGAGAATTAGGACATACAAAACACCGAATTTAAAGAGCAATTGGTAACACTAAAAGACAGTAATACTGCTAAAATAATTCAACTAAGAGAGGCCATAACTAATTTTGGAAATAAATATATAGTAAGATTGCCTTTCAAAGAAATATTAGGTATAAGAATCCCTGTTAAAATAAAATTGACACCCAAAGTATCTTATAAAATATTAGCACTAGTAGACACCGGGTGTACAAAGAATATTATTTATGACAAATATTTCATAAGATGTCCTGAAATAGTTCACACAATTGACGACAATAAGGCAGAAGTTTCCACAGACATGTCCGGAATAAAGAAAATTCATAATCAGTTAGCTTATAATATTGAGGTTTACATTAATGCAACTAAATATATAATAGATGAGATTACAATAAGAGATTTGTCAATGATTAATGATGACATGATAATTGGCCTAAGGTTCCTTCAACAATCAGTACAAACCACAGTAATACATGAGCAAGGAATTACTTTTATCCCATATCAAAATAATGTTCCATACATCTCAAAGGTACGAAAGCGTGGTGGAACCTCCCCC---------------AAACTCGACAACTTAGAAGTACCTAATCTTGAGTCTGAAGAAAGAATTAATGAATATGAGCTTAGTGAGAATATAGACAACTATTATATATCA
>Chr10:22433497-22435080:-1
AAGACATGCAGATGTTTCATATGTAATTCACCAGATCATTTAAGTAGAACTTGCCCAAATAAAGATCAAAAAAGATATTCTAGTAAATATGAAGAACAAGAGAGAGTTTTAATTATAGATAGCGTAAATGAAAATATATTAGTATGTGATGATGAAATAAAAGATGACGAATCAATATATTCTATCATAGAAACAGATGAAATTGAAAACACCAATGAAGAGTATGAATCAACCGATGAAGAGTTAGATTTAATTGACGAACTAGCCGGTTTAAAAATAGAATTGATGGATCAGTTAAATTGTGAACATGATTGGATTAGAGGAAAATGAGATTATAACATTAAATGTGCTTTTTGCATCTATTACCCAAGCCAAGATAATAGAGTAACCTGTAGTATATGCTTAAAACAAGCTTGTGCTGAATGTATAAAAGCAAATAAACAAAAATGGAGAAAAGAGATAGAATTAGAATCAGATGAAAGGATATTATCTAGTAGAGTACGAGTTTTAGAAAACAGAATAAATAAACTAGAAGTGGAACTAGAGAATCTAAAAATTAACTATGATATTAAGGCATTACCAGAAAATAAGGATATACAAAATACCGAATTTAAAGAGCAAGTGATAACATTAAAAGACAGTAATACTGCTAAAATAATTCAACTAAAAGATGCCATAACTAATTTCGGAAATAAATATATAGTAAAACTGCCTTTCAAAGAAATTTTGGGAATAAGAATACCGGTAAAAGTAAAACTATCACCCAAGGTATCATATAAAATTCTAGCACTAGTAGACACTGGGTGTACAAAAAATATTATTCATGATAAGTACTTCATAAAATGTCTAGAAATAGTTCATACAATTGATGATAATAAGGCAGAAGTCTCTACAGACATGTCCGGAATAAAGAAAATTCATAATCAGCTAGCTCATAATGTTGAAGTATACATTAATGGAACTAAATATATAATAGATGAGATTACAATAAGAAACTTATCCATGATAAGTGATGACATGATAATTGGCCTAAGGTTTTTACAACAATCGGTACAAACCACAGTAATACATGAGCAAGGAATTACTTTTATCCCATATCAAAACAATGTGCCATATATCTCAGAGGTACGAAAGCGTGGTGGAGCTAGAATC---------------AAACCCGACAACCTTGAAGCACTCAACCTTGAGTCTGAAGAAAGAATTAATGAATATGAACTTAGTGAGAATATAGACATCTATTATATATCA
>Chr11:9659043-9660627:1
AAAACATGCAGATGTTTTATATGCAACTCGCCAGATCATTTAAGTAGAACATGCCCAAATAAAGATCAAAAGAGATATTCTAGTAAATATGAAGAACAAGAGAGGGTTCTAATTATAGATAGCGTAAATGAAAACATATTAGTATGTGATGATGAAATAAAAGATGACGAGTCAATATATTCTATCATAGAAACAGATGAAGTTGAAACTATCAACGAAGAATATGAATCATCCGATGAAGAGTTAGATTTAATTGACGAATTAGCAGGTCTAAAGGTTGAAATGATGGATCAATTAAATTGTGAACATGATTGGATTAGAGGAAAGGGTGACTATAATATCAAATGTGCTTTTTGCATATATTACCCTAGTCAAGAAAATAGAGTGACTTGTAGTATATGTCTAAAATAAGCTTGTGCTGAATGTATAAAAGCAAATAAACAAAAATGGAGAAAAGAAATAGAATTAGAATCAGATGAAAAGATTTTATCTAGTAGAGTACGAGTGTTAGAAAATAGACTAAATAAATTAGAAATAGAATTAGAGAACCTAAAAAATAATTGTGATACTAAAGCATTACCAGAAAATAAGGACATACAAAACACCGAATTTAAAGAGCAATTGATAACACTAAAAGACAGTAATACTGCTAAAATAATTCAACTAAGAGATGCCATAACTAATTTTGGAAATAAATATATAGTAAGATTGCCTTTCAAAGAAATATTAGGTATAAGAATCCCTGTTAAAGTAAAATTGACACCCAAAGTATCTTATAAAATATTAGCACTAGTAGACACTGGGTGTACAAAGAATATTATTCATGACAAATATTTCACAAGATGTCCTGAAATAGTTCACACAATTGACGACAATAAGGCAGAAGTTTCCACAGACATGTCCGGAATAAAGAAAATTCATAATCAGTTAGCTTATAATATGGAGGTTTACATTAATGCAACTAAATATATAATAGATGAGATTACAATAAGAGATTTGTCAATGATTAATGATGACATGATAATTGGCCTAAGGTTCCTTCAACAATCAGTACAAACCACAGTAATACATGAGCAAGGAATTACTTTTATCCCATATCAAAACAATGTGCCATATATCTCAGAGGTACGAAAGCGTGGTGGAGCCAGAATC---------------AAACCCGACAACCTTGAAGCACTCAACCTTGAGTCTGAAGAAAGAATTAATGAATATGAACTTAGTGAGAATATAGACATCTATTATATATCA
>Chr12:4594070-4595649:1
AAGACATGCAGATGTTTCATATGTAATTCACCAGATCATTTAAGTAGAACTTGCCCAAATAAAGATCAAAAAAGATATTCTAGTAAATATGAAGAACAAGAGAGAGTTTTAATTATAGATAGCGTAAATGAAAATATATTAGTATGTGATGATGAAATAAAAGATGACGAATCAATATATTCTATCATAGAAACAGATGAAATTGAAAACACCAATGAAGAGTATGAATCAACCGATGAAGAGTTAGATTTAATTGACGAACTAGCCGGTTTAAAAATAGAAATGATGGATCAGTTAAATTGTGAACATGATTGGATTAGAGGAAAAGGAGATTATAACATTAAATGTGCTTTTTGCATCTATTACCCAAGCCAAGATAATAGAGTAACCTGTAGTATATGCTTAAAACAAGCTTGTGCTGAATGTATAAAAGCAAATAAACAAAAATGGAGAAAAGAGATAGAATTAGAATCAGATGAAAGGATATTATCCAGTAGAGTACGAGTTTTAGAAAACAGAATAAATAAACTAGAAGTAGAA----AGAACCTAAAAATTAACTATGATATTAAGGCATTACCAGAAAATAAAGATATACAAAATACCGAATTTAAAGAACAAGTGATAACATTAAAAGACAGTAATACTGCTAAAATAATTCAACTAAAAGATGCCATAACTAATTTTGGAAATAAATATATAGTAAAATTGCCTTTCAAAGAAATTTTGGGAATAAGAATACCGGTAAAAGTAAAACTATCACCCAAGGTATCATATAAAATTCTAGCACTAGTAGACACTGGGTGTACAAAAAATATTATTCATGATAAGTACTTTATAAAATGTCCAGAGATAGTTCATACAATTGATGATAATAAGGCAGAAGTCTCTACAGACATGTCCGGAATAAAGAAAATTCATAATCAGTTAGCTCATAATGTTGAAGTATACATTAATGGAACTAAATATATAATAGATGAGATTACAATAAGAAACTTATCCATGATAAGTGATGACATGATAATTGGCCTAAGGTTTTTACAACAATCGGTACAAACCACAGTAATACATGAGCAGGGAATTACTTTTATTCCATATCAAAACAATGTGCCATATATCTCAGAGGTACGAAAGCGTGGTGGAGCCAGAATC---------------AAACCCGACAACCTTGAAGCACTTAACCTTGAGTCTGAAGAAAGAATTAATGAATATGAACTTAGTGAGAATATAGACATCTATTATATATCA

#for S8 Fig. 
>IRGSP-1.0:1:23903404:23905128:-1
MDLPGKTSWEDRYLLKATKDFEYICREMASQKSEWLTNMSSWRLPQLPRGHGERFNHNFRVTELQQGLLNLLWQTKNKKEKAHALNGLAYYFKNFVPSDQKITEKRAKIQDIPHHEEMLLDYREEKSRDGQDKLPMEVEQSMATDKNTKVFSDKILISTDPASSMVAFHININNLLQSFPHNKPSSSTKRHDTIPQTPYILHNHPNSFLPQYILRTQPKAPCRSCAYKDSCQKKLKSQNPMSTTYENLQPRLSFKTEQTLSCFGQDILDLVWHKFKERQMKIFLGLQDYFFDLLEGRERNPAIRVIIYMLPLLRLDDQAISDPSYRFLVLKAEINLQRFRNLPTYNHEEISLQTIIDHGLVNSIYATLDQILQSDLGNAVKDICRRLGHGRYRIIFSSIPPKFTPPVRPAIHYIYIMNRQFNFQEDGPSKLSDEEEEIYTTIANHENWRLFSEAAEIEEAITTDYEYQLVFQNKITRIFISKFYNQSYEYFKGAGHIIKPDFGNECSKKSYYRSLAQWFQKT
>IRGSP-1.0:1:34121219:34122626:-1
MDLPGKTS-EDRYLLKATKNFEYICREMASQKSEWFTNMSSWRLPQLPRGHGERLNHNFRVTELQQGLLNLLWQAKNKKEKAHALNGLAYYFKNFVPSDQKITEKRAKLQDIPHHEERLLDYREEKSRDGQDKLPMEVEQSMATDKNTKVFSDKILISTDLALSMVAFHININNLLQSFPHNKPSSSTKRHDTIPQTPYILHNHPNSFLPQYILRTQPKAPCRSCAYKDSCQKKLKSQNPMSTTYENLQPRLSFKTEQTLSCFGQDILDLVWQKFKERQMKIFLGLQDYFFDLLEGRERNPAIRVIIYMLPLLRLDDQAISDPSYRFLVLKAEINLQRFRNLPTYNHEEISLQTIIDHGLVNSFYATLDQILQFDLGSAVKDVCRRLGHGRYRIIFSSIPPKFTPPVRPAIHYIYIINGQFNFQEDGPSKLSDEEEEIYTTIANHENWRLFSEAVEIG----------------------------------------------------------------
>IRGSP-1.0:1:8844742:8846516:1
MDLPGKTSWEDRYLLKATKNFEYICREMASQKSEWFTNMSSWRLPQLPRGHGERFNHNFRVTELQQELLNLLWKAKNKK-KAHALNGLAYYFKNFVPSDQKITEKRAKLQDIPHHEERLLDYREKKSRDGQDKLPMEVEQSMATNKNTKVFSDKILISTDPASSMVAFHININNLLQSFPHNKPSSSTKKHDTIPQTPYILHNHPNSFLPQYILWTQPKAPCRSCAYKDSCQKKLKSQNPMSTTYENLQPRLSFKTEQTLSCFGQDILDLVWQKFKERQMKIFLGLQDYFFDLLEGRERNPAIRVIIYMLPLLRLDDQAISDPSYRFLVLKAEINLQRFRNLPTYNHEEISLQTIIDHGLVNSIYATLDQILQSDLGSAVKDVCRRLGHGRYRIIFSSIPPKFTPPVHPTIHYIYIMNGQFNFQEDSPSKLSDEEEEIYTTIANHENWRLFSEAAEIEEAITTDYEYQLVFQNKITRIFISKYYNQSYEYFKGAGRIIKPDFGNECSKKSYYRSLAQWFQKT
>IRGSP-1.0:10:22713928:22715652:-1
MELPGKTSWEDRYLLKATKDFEYICREMASQKSEWLTNMSSWRLPQLPRGHGERFNHNFRITELQQGLLNLLWQTKNKKEKAHALNGLAYYFKNFVPSDQKITEKRAKIQDIPHHEERLLDYREEKSRDGQDKLPMEVEQSMATDKNTKVFSDKILISADPASSMVAFHININNLLQSFPHNKPSSSTKRHDTIPQTPYILHNHPNLFLPQYILRTQPKAPCRSCAYKDSCKKKLKSQNPMSTTYENLQPRLSFKTEQTLSCFGQDILDLVWQKFKERQMKIFLGLQDYFFDLLEGRERNPAIRVIIYMLPLLRLDDQAISDPSYRFLVLKAEINLQRFRNLPTYNHEEISLQTIIDHGLVNSIYATLDQILQSDLGNAVKDVCRRLGHGRYRIIFSSIPPKFTPPVRPAIHYIYIMKGQFNFQEDGPSKLSDEEEEIYTTVANHENWRLFSEAAEIEEAITTDYEYQLVFQNKITRIFISKFYNQSYEYFKGAGRIIKPDFGNECSKKSYYRSLAQWFQKT
>IRGSP-1.0:10:8408083:8409807:1
MDLPGKTSWEDRYLLKATKDFEYICREMASQKSEWLTNMSSWRLPQLPRGHGERFNHNFRITELQQGLLNLLWQTKNKKEKAHALNGLAYYFKNFVPSDQKITEKRAKIQDIPHHEERLLDYREEKSRDGQDKLPMEVEQSMATDKNTKVFSDKILISTDPASSMVAFHININNLLQSFPHNKPSSSTKRHDTIPQTPYILHNHPNSFLPQYILRTQPKAPCRSCAYKDSYKKKLKSQNPMSTTYENLQPRLSFKTEQTLSCFGQDILDLVWQKFKERQMKIFLGLQDYFFDLLEGRERNPAIRVIIYMLPLLRLDDQAISDPSYRFLVLKAEINLQRFRNLPTYNHEEISLQTIIDHGLVNSIYATLDQILQSDLGNAVKDVCRRLGHGRYRIIFSSIPPKFTPPVRPAIHYIYIMNGQFNFQEDGPSKLSDEEEEIYTTIANHENWRLFSEAAEIEEAITTDYEYQLVFQNKITRIFISKFYNQSYEYFKGAGRIIKPDFGNECSKKSYYRSLAQWFQKT
>IRGSP-1.0:11:28542203:28543892:-1
MDLTGKTSWEDRYLLKATKNFEYICKEMASQKSEWFTNMSSWRLPQLPRGHEERFNHNFRVTELQQGLLNLLWQTKNKKEKAHALNGLAYYFKNFVTSDQKITEKRAKLQDIPHHEERLLDYREEKSRDGQDKLPMEVEQSMATDKNTKVF------------SMVVFHININNLLQSFPHNKPSSSTKRHDTIPQTLYILHNHPNSFLPQYILRTQPKAPCRSCAYKDSCQKKLKSQNPMSSTYENLQPRLSFKTEQTLSCFGQDIFNLVWQKFKERQMKIFLGLQDYFFDLLEGRERNPAIRVIIYMLPLLRLDDQAISDPSYRFLVLKAEINLQRFWNLPTYNHEEISLQTIIDHGLVNSIYATLDQILQSDLGSAVKDVYRRLGHGRYRIIFSSIPPKFTPPVRPAIHYIYIMNGQFNFQEDGTSKLSDEEEEIYTTIANHENWRLFSEAAEIEEAITTDYEYQPVFQNKITRIFISKYYNQSYEYFKGAGRIIKPDFENECSKKSYYRSLAQWFQKT
>IRGSP-1.0:11:28586386:28588075:-1
MDLTGKTSWEDRYLLKATKNFEYICKEMASQKSEWFTNMSSWRLPQLPRGHEERFNHNFRVTELQQGLLNHLWQTKNKKEKAHALNGLAYYFKNFMTSDQKITEKRAKLQDIAHHEERLLDYREEKSRDGQDKLPMEVEQSMATDKNTKVF------------SMVVFHININNLLQSFPHNKPSSSTKRHDTIPQTLYILHNHPNSFLPQYILRTQPKAPCRSCAYKDSCQKKLKSQNPMSSTYENLQPRLSFKTEQTLSCFGQDIFNLVWQKFKERQMKIFLGLQDYFFDLLEGRERNPAIRVIIYMLPLLRLDDQAISDPSYRFLVLKAEINIQRFWNLPTYNHEEISLQTIIDHGLVNSIYATLDQILQSNLGSAVKDVYRRLGHGRYRIIFSSIPPKFTPPVRPAIHYIYIMNGQFNFQEDGTSKLSDEEEEIYTTIANHENWRLFSEAAEIEEAITTDYEYQPVFQNNITRIFISKYYNQSYEYFKGAGRIIKPDFGNECSKKSYYRSLAQWFQKT
>IRGSP-1.0:11:8297580:8299300:1
MDLPGKTSWEDIYLLKATKNFEYICREMAS-QSEWFTNMSSWRLPQLPRGHGE-FNHNFRVTELQQGLLNLLWQAKKKKEKAHALNGLAYYFKNFVPSDQKITEKRAKLQDIPHHEERLLDFREEKSRDGQDKLPMEVEQSMATYKNTKVFSDKILISTDPASSMVAFHININNLLQSFPHNKPSSSTKRHDTIPQTPYILHNHPNSFLPQYILRTQPKTPCRSCAYKDSCQKKLKSQNPRSTTNENLQPRLSFKTEQTLSCFGQDILNLVWQKFKERQMKIFLGLQDYFFDLLEGRERNPAIRVIIYMLPLLRLDDQAISDPSYRFLVLKAEINLQRFRNLPTYNHEEISLQTIIDHGLVNSIYATLDQILQSDLGSAVK-VCRRLGHGRYRIIFSSIPPKFTPPVHPAIHYIY-MNGQFNFQEDGPSKLSDEEEEIYTTIANHENWRLFSEAAEIEEAITTDYEYQLVFQNKIIRIFISKYYNQSYKYFKGAGRIIKPDFGNECSKKSYYRSLA-WFQKS
>IRGSP-1.0:11:9621176:9622900:-1
MELPGKTSWEDRYLLKATKDFEYICREMASQKSEWLTNMSSWRLPQLPRGHGERFNHNFRITELQQGLLNLLWQTKNKKEKAHALNGLAYYFKNFVPSDQKITEKRAKIQDIPHHEERLLDYREEKSRDGQDILPMEVEQSMATDKNTKVFSDKILISADPASSMVAFHININNLLQSFPHNKPSSSTKRHDTIPQTPYILHNHPNLFLPQYILRTQPKAPCRSCAYKDSCKKKLKSQNPMSTTYENLQPRLSFKTEQTLSCFGQDILDLVWQKFKERQMKIFLGLQDYFFDLLEGRERNPAIRVIIYMLPLLRLDEQAISDPSYRFLVLKAEINLQRFRNLPTYNHEEISLQTIIDHGLVNSIYATLDQILQSDLGNAVKDVCRRLGHGRYRIIFSSIPPKFTPPVRPAIHYIYIMKGQFNFQEDGPSKLLDEEEEIYTTVANHENWRLFSEAAEIEEAITTDYEYQLVFQNKITRIFISKFYNQSYEYFKGAGRIIKPDFGNECSKKSYYRSLAQWFQKT
>IRGSP-1.0:12:22980278:22982004:-1
MELPGKTSWEDRYLLKATKDFEYICREMASQKSEWLTNMSSWRLPQLPRGHGERFNHNFRITELQQGLLNLLWQTKNKKEKAHALNGLAYYFKNFVPSDQKITEKRAKIQDIPHHEERLLDYREEKSRDGQDKLRMEVEQSMATDKNTKVFSDKILISADPASSMVAFHININNLLQSFPHNKPSSSTKRHDTIPQTPYILHNHPNLFLPQYILRTQPKAPCRSCAYKDSCKKKLKSQNPMSTTYENLQPRLSFKTEQTLSCFGQDILDLVWQKFKERQMKIFLGLQDYFFDLLEGRERNPAIRVIIYMLPLLRLDDQAISDPSYRFLVLKAEINLQRFRNLPTYNHEEISLQTIIDHGLVNSIYATLDQILQSDLGNAVKDVCRRLGHGRYMIIFSSIPPKFTPPVRPAIHYIYIMKGQFNFQEDGPSKLSDEEEEIYTTVANHENWRLFSEAAEIEEAITTDYEYQLVFQNKITRIFISKFYNQSYEYFKGAGRIIKPDFGNECSKKSYYRSLAQWFQKT
>IRGSP-1.0:2:11308985:11310709:1
MDLPCKTSWEDRYLLKATKNFEYICREMASQKSEWFTNMSSWRLPQLPRGHGERFNHNFRVTELQQGLLNHLWQAKNKKEKAHALNGLAYYFKNFVPSDQKITEKRAKLQDIPHHEERLLDYREEKSRDGQDKLPMEVEQSMATDKNTKVFSDKILISTDPASSMVAFHININNLLQSFPHNKPSSSTKRHDTIPQTPYILHNHPNSFLPQYILRTQPKAPCRSCAYKDSCQKKLKSQNPMSTTYENLQPRLSFKTEQTLSCFGQDILDLVWQKFKERQMKIFLGLQDYFFDLLEGRERNPAIRVIIYMLPLLRLDDQAISDPSYRFLVLKAEINLQRFRNLPTYNHEEISLQTIIDHGLVNSIYATLDQILQSDFGSDVKDVCRRLGNGRYRIIFSSIPPKFTPPVRPAIHYIYIMNGQFNFQEDGPSKLSDEEEEIYTTIANHENWRLFSEAAEIEEAITTDYEYQLVFQNKITRIFISKYYNQSYEYFKGAGRIIKPDFGNECSKKSYYRSLAQ-FQKS
>IRGSP-1.0:4:23051051:23052194:1
-----------------------------------------------------------------------------------------------------------------------------------------------------------------------------------------------DTIAQTPYILHNHPNSLLPQYILRTQPIAPCRPCAYKDSYQKKLKGQNPMSTAYEYLQPRLSFKTEQILSCFGQDILDLVWQKFKERQMKIF---QDYFFHLL-GRERNPAIQVIIYMLPILRLDDQVISDPSYRFMVLKAEINLQRFRNLPTYNHDEISLQTIIDHGLVNSIYATLDRILQFDLGSAVKDVCRRLRNGRYRIIFSSIPPKFTPHARPAIHYIYIMNKQFNFQEGGPSKLSDEQEEMYTMIANHENWRLFSEAAEIEEAITIDYEYQLVFQNKITRIFISRYYNQSCEYFKGAGRIIKPDF---------YRSLAQWYQKT
>IRGSP-1.0:8:11156296:11157994:-1
MELPGKTSWEDRYLLKATKDFEYICREMASQKSEWLTNMSSWRLPQLPRGHGERFNHNFRITELQQGLLNLLWQTKNKKEKAHALNGLAYYFKNFVPSDQKITEKRAKIQDIPHHEDRLLDYREEKSRDGQDKLPMEVEQSMATDKNTKVFSDKILISADPASSMVAFHININNLLQSFPHNKPSSSTKRHDTIPQTPYILHNHPNLFLPQYILRTQPKAPCRSCAYKDSCKKKLKSQNPMSTTYENLQPRLSFKTEQTLSCFGQDILDLVWQKFKERQMKIFLGLQDYFFDLLEGRERNPAIRVIIYMLPLLRLDEQAISDPSYRFLVLKAEINLQRFRNLPTYNHEEISLQTIIDHGLVNSIYATLDQILQSDLGNAVEDVCRRLGHGRYRIIFSSIPPKFTPPVRPAIHYIYIMKGQFNFQEDGLSKLSDEEEEIYTTVANHENWRLFSEAAEIEEAITTDYEYQLVFQNKITRIFISKFYNPSYEYFKGAGRIIKPDFGNECSKKSYYRNLAQWFQKT
>IRGSP-1.0:8:11184052:11185776:1
IELPGKTSWEDRYLLKATKDFEYICREMASQKSEWLTNMSSWRLPQLPRGHGERFNHNFRITELQQGLLNLLWQTKNKKEKAHALNGLAYYFKNFVPSEQKITEKRAKMQDIPHHEERLLDYREEKSRDGQDKLLMEVEQSMATDKNTKVFSDKILISADPASSMVAFHININNLLQSFPHNKPSSSTKRHDIIPQTPYILHNHPNLFLPQYILRTQPKAPCRSCAYKDSCKKKLKSQNPMSTTYENLQPRLSFKTEQTLSCFGQDILDLIWQKFKERQMKIFLGLQDYFFDLLEGRERNPAIRVIIYMLPLLRLDNQAISDPSYRFLVLKAEINLQRFRNLPTYNHEEISLQTIIDHGLVNSIYATLDQILQSDLGNAVKDVCRRLGHGRYRIIFSSIPPKFTPPVRPAIHYIYIMKGQFNFQEDGLSKLSDEEEEIYTTVANHENWRLFSEAAEIEEAITTDYEYQLVFQNKITRIFISKFYNQSYEYFKGAGRIIKPDFGNECSKKSYYRNLAQWFQKT
>IRGSP-1.0:8:11191297:11193020:1
IELPGKTSWEDRYLLKATKDFEYICREMASQKSEWLTNMSSWRLPQLPRGHGERFNHNFRITELQQGLLNLLWQTKNKKEKAHALNGLAYYFKNFVPSDQKITEKRAKMQDIPHHEERLLDYREEKSRDGQDKLLMEVEQSMATDKNTKVFSDKILISADPASSMVAFHININNLLQSFPHNKPSSSTKRHDIIPQTPYILHNHPNLFLPQYILRTQPKAPCRSCAYKDSCKKKLKSQNPMSTTYENLQPRLSFKTEQTLSCFGQDILDLVWQKFKERQMKIFLGLQDYFFDLLEGRERNPAIRVIIYMLPLLRLDNQAISDPSYRFLVLKAEINLQRFRNLPTYNHEEISLQTIIDHGLVNSIYATLDQILQSDLGNAVKDVCRRLGHGRYRIIFSSIPPKFTPPVRPAIHYIYIMKGQFNFQEDGLSKLSDEEEEIYTTVANHENWRLFSEAAEIEEAITTDYEYQLVFQNKITRIFISKFYNPSYEYFKGAGRIIKPDFGNECSKKSYYRNLAQWFQKT
>IRGSP-1.0:8:11211964:11213687:1
IELPGKTSWEDRYLLKATKDFEYICREMASQKSEWLTNMSSWRLPQLPRGHGERFNHNFRITELQQGLLNLLWQTKNKKEKAHALNSLAYYFKNFVPSDQKITEKRAKMQDIPHHGERLLDYREEKSRDGQDKLLMEVEQSMATDKNTKVFSDKILISADPASSMVAFHININNLLQSFPHNKPSSSTKRHDIIPQTPYILHNHPNLFLPQYILRTQPKAPCRSCAYKDSCKKKLKSQNPMSTTYENLQPRLSFKTEQTLSCFGQDILDLVWQKFKERQMKIFLGLQDYFFDLLEGRERNPAIRVIIYMLPLLRLDNQAISDPSYRFLVLKAEINLQRFRNLPTYNHEEISLQTIIDHGLVNSIYATLDQILQSDLGNAVKDVCRRLGHGRYRIIFSSIPPKFTPPVRPAIHYIYIMKGQFNFQEDGLSKLSDEEEEIYTTVANHENWRLFSEAAEIEEAITTDYEYQLVFQNKITRIFISKFYNQSYEYFKGAGRIIKPDFGNECSKKSYYRNLAQWFQKT
>IRGSP-1.0:8:11231580:11233304:1
IELPGKTSWEDRYLLKATKDFEYICREMASQKSEWLTNMSSWRLPQLPRGHGERFNHNFRITELQHGLLNLLWQTKNKKEKAHALNSLAYYFKNFVPSDQKITEKRAKMQDIPHHEERLLDYREEKSRDGQDKLLMEVEQSMATDKNTKVFSDKILISADPASSMVAFHININNLLQSFPHNKPSSSTKRHDIIPQTPYILHNHPNLFLPQYILRTQPKAPCRSCAYKDSCKKKLKSQNPMSTTYENLQPRLSFKTEQTLSCFGQDILDLVWQKFKERQMKIFLGLQDYFFDLLEGRERNPAIRVIIYMLPLLRLDNQAISDPSYRFLVLKAEINLQRFRNLPTYNHEEISLQTIIDHGLVNSIYATLDQILQSDLGNAVKDVCRRLGHGRYRIIFSSIPPKFTPPVRPAIHYIYIMKGQFNFQEDGLSKLSDEEEEIYTTVANHENWRLFSEAAEIEEAITTDYEYQLVFQNKITRIFISKFYNQSYEYFKGAGRIIKPDFGNECSKKSYYRNLAQWFQKT
>IRGSP-1.0:8:11237585:11239309:-1
IELPGKTSWEDRYLLKATKDFEYICREMASQKSEWLTNMSSWRLPQLPRGHGERFNHNFRITELQQGLLNLLWQTKNKKEKAHALNGLAYYFKNFVPSDQKITEKRAKMQDIPHHEERLLDYREEKSRDGQDKLLMEVEQSMATDKNTKVFSDKILISADPASSMVAFHININNLLQSFPHNKPSSSTKRHDIIPQTPYILHNHPNLFLPQYILRTQPKAPCRSCAYKDSCKKKLKSQNPMSTTYENLQPRLSFKTEQTLSCFGQDILDLVWQKFKERQMKIFLGLQDYFFDLLEGRERNPAIRVIIYMLPLLRLDNQAISDPSYRFLVLKAEINLQRFRNLPTYNHEEISLQTIIDHGLVNSIYATLDQILQSDLGNAVKDVCRRLGHGRYRIIFSSIPPKFTPPVRPAIHYIYIMKGQFNFQEDGLSKLSDEEEEIYTTVANHENWRLFSEAAEIEEAITTDYEYQLVFQNKITRIFISKFYNQSYEYFKGAGRIIKPDFGNECSKKSYYRNLAQWFQKT
>IRGSP-1.0:8:25041978:25043608:-1
MDLPGKTSWEDRYLLKATKDLEYICREMASQKSEWLTNMSSWRLPQLPRGHGERFNHNFRITELQQGLLNLLWQTKNKKEKAHALNGLAYYFKNFVPTDQKIT-KRAKIQDIPHYEERLLDYREEKSRDGQDKLPMEVEQSMATDKNTKVFSDKILISTDPASSMVAFHININNLLQSFPHNKPSSSTKKHDTIP-TPYILHNHPNSFLPQYILRTQPKAPCRSCAYKDSCQKKPKSQNPMSTAYENLQPRLSFKTEQTLSCFGQDILDLVWQKFKERQMKIFLGLQDYFFDLLEGRERNPAIRVIIYMLPLLRLDDQAISDPSYKFLVLKAEINLQRFRNLPTYNHEEISLQTIIDHGLVNSIYATLDQILQSDLGNAVKDVCRRLGHGRYRIIFSSIPPKFTPPVRPAIHYIYIMNGQFNFQEDGPSKLSDEEEEIYTTIANHENWRLFSEAAEIEEAITTDYEYQLVFQNKITRIFISKFYNQSSEYFKGAGRIIKPDFGNECSKKSYYRSLAQWFQKT
>IRGSP-1.0:9:20418743:20420539:1
MDLPGKTSWEDRYLLKATKNFEYICREMASQKSEWFTNMSSWRLPQLPRGHGK-FNHNFRVTELQQGLLNLLWQAKNKKEKAHALNGLAYYFKNFVPSDQKITEKRAKLQDIPHHEERLLDYREEKSRDGQDKLPMEVEQSMATDKNTKVFSDKILISTNPASSMVAFHININNLLQCFPHNKPSSSTKRHDTIPQTPYILHNHPNSFLPQYILRTQPKAPCRSCAYKYSCQKKLKSQNPMSTTYENLQPRLSFKTEQTLSCFGQDILDLVWQKFKERQMKIFLGLQDYFFDLLEGRERNPAIRVIIYMLPL-RLDDQAISNPSYRFLVLKAEINLQRFRNLPTYNHEEISLQTIIDHGLVNSIYATLDQILQSDLGSAVKDICRRLGHGRYRIIFSSIPPKFTPPVRPTIHYIYIMNGQFNFQEDGPSKLSDEEEEIYTTIANHENWRLFSEAAEIEEAITTDYEYQLVFQNKITRIFISKYYNQSYEYFKGAGHIIKPDFGNECSKKSYYRSLAQWFQKS
>IRGSP-1.0:9:21424201:21425983:-1
MDLPGKTSWEDRYLLKATKKFEYICREMAS-KSEWFTNISSWRLPQLPRGHGERFNHNFRVTDLQQGLLNLLWQAKNKKEKAHALNGLAYYFKNFMPSDQKITEKRAKLQDIPHHEERLLDYREEKSRDGQDKLPMEVEQSMATDNNTKVFSDKILISTDPASSMVAFHININNLLQSFPHNKPSSSTKRHDTIPQTPYILHNHPNSFLPQYILRTQPKAPCRSCAYKDSCQKKLKSQNPMSTTYENLQPRLSFKTEQTLSCFGQDILDLVWQKFKERQMKIFLGLQDYFFDLLEGRQRNPAIRVIIYMLPLLRLDDQVISDPSYRFLVLKAEINLQRFRNLPTYNHEEISLQTIIDHGLMNSIYATLDQILQSDLGSAVKDVCRRLGHGRYRIIFSSIPPKFTPPVRPAIHYIYIMNGQFNFQEDGPSKLSDEEEEIYTTIANHENWRLFSEAAEIEEAITTDYEYQLVFQKRIIRIFISKYYNQSYEYFKEAGRIIKPDFGNEYSKKSYYRSLAQWFQKK

#for S11 Fig.
>IRGSP-1.0:11:28585685:28587506:-1
AAGATAATGAATAAAGATCTTGTCATCCCCGACAAAGATCACTATTCAAGATAAGGAATCTACACTATTCCAGATAAGATGAGTCCATAGTCAAAAGGCGATATTATGACATCTTTATTAAAGGTCTAAAGCGTCATCACCAAAGATTCTCTCCATAAAGTCTAAAGGGGTATCATAAACTCTTTGAGGTCAAGAAGAGATATCATAAAGATTCTCTACCGAGCGCTATATAAGGGGCTCATCATCACATTCCACAGGCATCGCATTTCACACACAACACATCTCACTCAACCATTCCTCTCACCTCTCCACCAGCCATCACACTCCACTCCACTCCATCTAAGTGTTAGTACTATAGTATAACCTAAATAAAAGACTCATGAGAGTCTAAGTGTGAGAGTCTATGTAAGAGTCCTTGTGAGAGTCCTATACCTGTATAATTACGAACGTGTTGTACCAAGTCCTTGGTGTAATCTTCAGAAGGATCTACCTTCAACCTATCAAGGTATATGAATGAACACCTGGACCGTTCTATATAAACCTACTATGTTCTGAATATCTAATT----CTATATCTTGTATATAATTCGTATTTACAGCTTGTCTTTATTTCCTGTACTGCATTTATGTTTGCATAATAACAACCTGGATTGCCATCCAATTGTCACATACTAATCTCACATCCAAGATTGCATATAGATACTGCATACCTATCCTCATAT
>IRGSP-1.0:11:28541504:28543323:-1
AAGATAATGAATAAAGATCTTGTCATCCCCGACAAAGATCACTATTCAAGATAAGGAATCTACACTATTCCAGATAAGATGAGTCCATAGTCAAAAGGCGATATTATGACATCTTTATTAAAGGTCTAAAGCGTCATCACCAAAGATTCTCTCCATAAAGTCTAAAGGGGTATCATAAACTCTTTGAGGTCAAGAAGAGATATCATAAAGATTCTCTACCGAGCGCTATATAAGGGGCTCATCATCACATTCCACAGGCATCGCATTTCACACACAACACATCTCACTCAACCATTCCTCTCACCTCTCCACCAGCCATCACACTCCACTCCACTCCATCTAAGTGTTAGTACTATAGTATAACCTAAATAAAAGACTCATGAGAGTCTAAGTGTGAGAGTCTATGTAAGAGTCCTTGTGAGAGTCCTGTACCTGTATAATTACGAACGTGTTGTACCAAGTCCTTGGTGTAATCTTCAGAAGGATCTACCTTCAACCTATCAAGGTATATGAATGAACACCTGAACCGTTCTATATAAACCTACTATGTTCTGAATATCTAATT----CTATATCTTGTATATAATTCGTATTTACAGCTTGTCTTTATTTCCTGTACTGCATTTATGTTTGCATAATAACAACCTGGATTGCCATCCAATTGTCACATACTAATCTCACATCCAAGATTGCATATAGATACTGCATACCTATCCTCATAT
>IRGSP-1.0:1:23902731:23904524:-1
AAGATAATGAATAAAGATCTTGTCATCCCCGACAAAGATCACTATTCAAGATAAGGAATCTACACTATTCTAGATAAGATAAGTCTATGGTCAAAAGGCGATATTATGACATCTTTATTGAAGGTCAAAAGCGTCATCATCAAAGATTCTCTCCATGAAGTCTAAAGGGATATCATGAACTCTTTGAAGTCAAGAAGAGATATCATGAAGATTCTCTACCGAGCGCTATATAAGGGGCTCA-------------GAGGCATCGCATTCCACACACAACACATCTCACTCAACCGTTCCTCTCACCGCTCCACCAGCCATCACACTCCACTCCACTCCATCAAAGTGTTAGTACTATAGTATAACCTAAATAAAAGACTCATGAGAGTCTAAGTGTGAGAGTCTATGTAAGAGTCTTTGTGAGAGTCCTGTACCTGTATAATTACGAACGTGTTGTACCAAGTCCTTGGTGTAATCTTCAGAAGGAACTACCTTCAACCTATCAAGGTATATGAATGAACACCTGGACCGTTCTATATAAACCTATTATGTTCTAAATATCTAATT----TTATATCTTGTACATAATTTGTATTTACA-----TCTTTATTTCCAGTACTGCATTTATGTTTGCATAATAACAACCTGGATTGCCATCCAATTGTCACATACTAATCTCACATCAAAGATTGCATATAGATA-AGCATTCCTATCCTCATAT
>IRGSP-1.0:9:21423506:21425379:-1
AAGACAATGAATAAAGATCTTGTCATCCCCAACAAAGATCACTATTCAAGATAAGGAATCTACACTATTCTAGATAAGATAAGTCTATAGTCCAAAGGCGATATTATGACATCTTTATTAAAGGTCTAAAGCGTCATCACCAAAGATTCTCTCCATGAAGTCTAAAGGGGTATCATAAACTCTTTAAGGTCAAGAAGAGATATCATGAAGATTCTCTACCGAGCGCTATATAAGGGGCTCAC----------------CATCGCATTTCACACACAACACATCTCACTCAACCATTCCTCTCACCTCTCCACCAGCCATCACATTCCACTCCACTCCATCTAAGTGTTAGTACTTTAGTATAACCTAAATAAAAGACTCATGAGAGTCTAAGTGTGAGAGTCTATGTAAGAGTCCTTGTGAGAGTCCTGTACCTGTATAATTACGAACGTGTTGTACCAAGTCCTTGGTGTAATCTTAAGAAGGATCTACCTTCAACCTATCAAGGTATATGAATGAACACCTGGACCGTTCTATATAAACCTACTATGTTCTAAATATCTAATT----TTATATCTTGTACATAATTCGTATTTACAGCTTGTCTTTATTTCATGTACTGCATTTATGTTTGCATAATAACAACCTGGATTGCCATACAATTGTCACATACTAATCTCACATCCAAGATTGCATATAGATACTGCATTCCTATCCTCATAT
>IRGSP-1.0:7:27572424:27573252:-1
AAGATAATGAGTAAAGATCTTGTCATCCCCGACAAAGATCACTATTCAAGATAAGGAATCTACACTATTCCAGATAAGATAAGTTTATGGTCAAAAGGCGATATTATGACATCTTTATTGAAGGTCAAAAGCGTCATC---AAAGATTCTCTCCATGAAGTCTAAAGGGATATCATGAACTCTTTGAAGTCAAAAAGAGATATAATGAAGATTCTCTACCGAGCGCTATATAAGGGGCTCACTATCACATTTCAGAGGCATCGCATTCCACACACAACACATCTCACTCAACCATTCCTCTCACCGCTCCACCAGCCATCACACTCCACTCCACTCCATCTAAGTGTTAGTACTATAGTATAACCTAAATAAAAGACTCATGAGAGTCTAAGTGTGAGAGTCTATGTAAGAGTCCTTGTGAGAGTCCTGTACCTGTATAATTACGAACGTGTTGTACCAAGTCCTTGGTGTAATCTTCAGAAGGATCTACCTTCAACCTATCAAGGTATATGAATAAACACCTGGACCGTTCTATATAAACCTACTATGTTCTAAATATCTAATT----TTATATCTTGTACATAATTCGTATTTACAGCTTGTCTTTATTTCCTGTACTGCATTTATGTTTGCATAATAACAACCTGGATTGCCATCCAATTGTCACATACTAATCTCACATCCAAGATTGCATATAGATA-AGCATTTCTATCCTCATAT
>IRGSP-1.0:4:23049961:23050625:-1
AAGATAATGAATGAAGATCTTGTTATCCTCGACAAAAAACACTATTGAAGATAAGGAATCTACACTATTCAAGATAAGATATGCCTATAGTCAAAAGGCGATATTATGATACTTTTATTGAAGGTCAAAAGCGTCATCACCAAAGATTCTCTCCGTGAAGTCTAAAGGGATATCATAAACCCCTTAAAGTCAAATGGAGATATCATAAAGATTCTTCACCGAGTCCTATATAAGGGGCTCAGGAAC-----------------------ACACACAACACATCTCACTCAACCATTCCTCTCACCTCTCCACCAGCCATCACACTT-----CACTCCATCTAAGTGTTAGTAGTATAGTATAACCTAAATAAAAGACTTATGAAATTCTAAGTGTGAGAGTCTATGTAAGAGTCCTTGTGAGAGTCATGTACCTGTATAATTACGAACGTGTTGTACCAAGTCCTTGGTGTAATCTTCAGAAGGATCTACCTTCAACCTATCAAGGTATATGAATGAACACATGGACCGTTCTATATAAAACTACTATGTTCTAAGTATCTAATTTACATTATGTCTTGTACATAATTGGTATTTACCGTTTGTCTTTACTTTCTATACTGCATTTATGTTTGCATAGAACCAAACTGGATTACCATCCA--------------------------------------------------------------
>IRGSP-1.0:5:20224853:20225487:-1
AAGATAATGAGTAAAGATCTTGTCATTCCCGATAAAGATCACTATTCAAGATAAGGAATCTACACTATTCCAGATAAGATAAGTCCATGGTCAAAAGGCGATATTATGACATCTTTATTGAAGGTCAAAAGCTTCATCACCAAAGATTCTCTCCGTAAAGTCTAAAGGGATATCATGAACTCTTTGAAGTCAAGAAGAGATATCATGAAGATTCTCTACCGAGCGCTATATAAGGGGCTCACCATCACACTTCGGAGGCATCGCATTTCACACACAACACATCCCACTCAACCATTCCTCTCACCTCTCCACCAGCCATCACACTCCACTCCACTCCATCTAAGTGTTAGTACTATAGTATAACCTAAATAAAAGACTCATGAGAGTCTAAGTGTGAGAGTCTATGTAAAAGTCCTTGTGAGAGTCCTGTACTTGTATAATTACGAACGTGTTGTACCAAGTCCTTGGTGTAATCTTCAGAAGGATCTACCTTCAACCTATCAAGGCATATGAATGAACACCGGGACCATTCTATATAAACCTACTATGTTCTAAATATCTAATT----TTATATCTTGTACATAATTCATATTTACAGCTTGTCTTTATTTCCTGTACTGCATTTATGTTTGCATAAT-----------------------------------------------------------------------------------
>IRGSP-1.0:11:11860530:11861093:-1
AAGATAATGAATAAAGATCCTGTCATCCCCGACAAAGATCACTATTCAAGATAAGGAATCTACACTATTCTAGATAAGATAAGCCTATAGTCAAAAGGCGATATTATGACATCTTTATTGAAGGTCAAAAGCGTCATCACCAAAGATTCTCTCCATGAAGTCTAAAGGGATATCATAAACTCTTTGAAGTCAAGAAGAGATATCATGAAGATTCTCTACCGAGTGCTATATAAGGGGCTCACCATCGCATTCCACAAGCATCGCATTTCACACACAACACATCTCACTCAACCATTCCTCTCGCCTCTCCACCAGCCATCACACTCCACTCCACTCCATCTAAGTGTTTGTACTATAGTATAACCTAAATAAAAGACTCATGAGAGTCTAAGTGTGAGAGTCTATGTAAGAGTCCTTGTGAGAGTCCTGTACCTGTATAATTACGAACGTGTTGTACCAAGTCCTTGGTGTAATCTTCAGAAGGATCTACCTTCAACTTATCAAGGTATATGAATGAACACCTGGACCGTTCTATATAAACCTACTATGTT---------------------------------------------------------------------------------------------------------------------------------------------------------------------------
>IRGSP-1.0:11:19847669:19848205:1
AAGATAATGAATAAAGATCTTGTCATCCCCGACAAAGATCACTATTCAAGATAAGGAATCTATACTATTCCAGATAAGATAAGTCTATGGTCAAAAGGCGATATTATGACATCTTTATTGAAGGTCAAAAGCGTCATCATCAAAGATTCTCTCCATGAACTTTAAAGGGATATCATGAACTCTTTGAAGTCAAA-AGAGATATCATGAAGATTCTCTACTGAGCGCTATATAAGGGGCTCACTATCACATTTCAGAGGCATCGCATTCCACACACAACACATCTCACTCAACCATTCCTCTCACCGCTCCACTAGCCATCACACTCCACTCCACTCCATCTAAGTGTTAGTACTATAGTATAACCTAAATAAAAGACTCATGAGAGTCTAAGTGTGAGAGTCTATGTAAGAGTCTTTGTGAGAGTCCTGTACCTGTATAATTAGGAACGTGTTGTACCATGTCCTTGGTGTAATCTTCAGAAGGATCTACCTTCAACCTATCAAGGTATATGAATGAACACCTGGACCGTTCTATATA----------------------------------------------------------------------------------------------------------------------------------------------------------------------------------------
>IRGSP-1.0:12:19510798:19511349:1
AAGATAATGAATAAAGATCTTGTCATCCCCGACAAAGATCACTATTCAAGATAAGGAATCTACACTATTCCAGATAAGATAAGTCTATGGTCAAAAGGCGATATTATGACATCTTTATTGAAGGTCAAAAGCGTCATCATCAAAGATTCTCTCCATGAAGTCTAAAGGGATATCATGAACTCTTTGAAGTCAAGAAGAGATATCATGAAGATTCTCTACCGAGCACTATATAAGGGGCTCACTATCACATTTCAGAGGCATCGCATTCCACACACAACACATCTCACTCAACCGTTCCTCTCACCGCTCCACCAGCCATCACACTCCACTCCACTCCATCTAAGTGTTAGTACTATAGTATAACCTAAATAAAAGACTCATGAGAGTCTAAGTGTGAGAGTCTATGTAAGAGTCTTTGTGAGAGTCCTGTACCTGTATAATTACGAACGTGTTGTACCAAGTCCTTGGTGTAATCTTCAGAAGGAACTACCTTCAACCTATCAAGGTATATGAATGAACACCTGGACCGTTCTATATAAACCTATTATGTT---------------------------------------------------------------------------------------------------------------------------------------------------------------------------
>IRGSP-1.0:1:8845323:8847149:1
AAGATAATGAATAAAGATCTTGTCATCCCCGACAAAGATCACTATTCAAGATAAGGAATCTACACTATTCAAGATAAGATAAGTCCATAGTCAAAAGGCGATATTATGACATCTTTATTAAAGGTCTAAAGCGTCATCACCAAAGATTCTCTCCATGAAGTCTAAAGGGGTATCATAAACTCTTTGAGGTCAAGAAGAGATATCATGAAGATACTCTACCGAGCGCTATATAAGGGGCTCACCATCACATTTCACAGGCATCGCATTTCACACACAACACATCTCACTCAACCATTCCTCTCACCTCTCCACCAGCCATCACACTCCACTCCACTCCATCTAAGTGTTAGTACTATAGTATAACCTAAATAAAAGACTCATGAGAGTCTAAGTGTGAGAGTCTATGTAAGAGTCCTTGTGAGAGTCCTGTACCTGTATAATTACGAACGTGTTGTACCAAGTCCTTGGTGTAATCTTCAGAAGGATCTACCTTCAACCTATCAAGGTATATGAATGAACACCTGGACTGTTCTATATAAACCTACTATGTTCTCAATATCTAATT----TTATATCTTGTACATAATTTGTATTTATAGCTTGTCTTTATTTCTTGTACTGCATTTATGTTTGCATAATAACAACCTGGATTGCCATCCAATTGTCACATACTAATCTCACATCCAAGATTGCATATAGA----------------------
>IRGSP-1.0:9:20419349:20421219:1
AAGATAATGAATAAAGATCTTGTCATTCCCGACATAGATCACTATTCAAGATAAGGAATCTACACTATTGCAGATAAGATAAGTCTATGGTCAAAAGGCGATATTATGACATCTTTACTAAAGGTCAAAAGCGTCATCACCAAAGATTCTCTTCATGAAGTCTAAAGGGATATCATGAACTCTTTGAAGTCAAGAAGAGATATCATGAAGATTCTCTACCGAGCGCTATATAAGGGGCTCACCATCACATTTCAGAGGCATCGCATTTCACACACAACACATCTCACTCAACCATTCCTCTCACCTCTCCACCAGCCATCACACTCCACTCCACTCCATCTAAGTGTAAGTACTATAGTATAACCTAAATAAAAGACTCATGAGAGTCTAAGTGTGAGAGTCTATGTAAGAGTCCTTGTGAGAGTCCTGTACCTGTATAATTACGAACGTGTTGTACCAAGTCCTTGGTGTAATCTTCAGAAGGATCTACCTTCAACCTATCAAGGTATATGAATGAACACCTGGACCGTTCTATATAAACCTACTATGTTCTAAATATCTAATT----TTATATCTTGTACATAATTCGTATTTACAGCTTGTCTTTATTTCCTGTACTGCATTTATGTTTGCATAATAACAACCTGGATTGCCATCCAATTGTCACATACTAATCTCACATCCAAGATTGCATATAGATACTGCATTCCTATCCTCATAT
>IRGSP-1.0:3:22472973:22474626:1
AAGATAATGAATAAAGATCTTGTCATCCCCGACAAAGATCACTATTCAAGATAAGGAATCTACACTATTCCAGATAAGATAAGTCTATGGTCAAAAGGCGATATTATGACATCTTTATTGAAGGTCAAAAGCGTCATCATCAAAGATTCTCTCCATGAAGTCTAAAGGGATATCATGAACTCTTTGAAGTCAAGAAGAGATATCATGAAGATTCTCTACCGAGCGCTATATAAGGGGCTCACTATCACATTTCAGAGGCATCGCATTCCACACACAACACATCTCGCTCAACCGTTCCTCTCACCGCTCCACCAGCCATCACACTCCACTCCACTCCATCTAAGTGTTAGTACTATAGTATAACCTAAATAAAAGACTCATGAGAGTCTAAGTGTGAGAGTCTATGTAAGAGTCTTTGTGAGAGTCATGTACCTGTATAATTACGAACGTGTTGTACCAAGTCCTTGGTGTAATCTTCAGAAGGAACTACCTTCAACCTATCAAGGTATATGAATGAACACCTGGACCGTTCTATATAAACCTATTATGTTCTAAATATCTAATT----TTATATCTTGTACATAATTTGTATTTACA-----TCTTTATTTCCTGTACTGCATTTATGTTTGCATAATAACAACCTGGATTGCCATCCAATTGTCACATACTAATCTCACATCCAAGATTGCATATAGATA-AGCATTCCTATCCTCATAT
>IRGSP-1.0:11:8298183:8299953:1
AAGATAATGAATAAAGATCTTGTCATTCCCGACAAAGATCACTATTCAAGATAAGGAATCTACACTATTCCAGATAAGATAAGTCTA----------------------------------AGGTCAAAAGCGTCATCACCAAAGATTTTCTCCATGAAGTCTAAAGGGATATCATGAACTCTTTGAAGTCAAGAAGAGATATCATGAAGATTCTCTACCGAGCGCTATATAAGGGGCTCACAATCATATTTCAGAGGCATCGCATTTCACACACAACACATCTCACTCAACCATTCCTCTCACCTCTCCACCAGCCATCGCACTCCACTCCACTCCATCTAAGTGTTAGTACTATAGTATAACCTAAATAAAAGACTCATGAGAGTCTAAGTGTGAGAGTCTATGTAAGAGTCCTTGTGAGAGTCCTGTACCTGTATAATTACAAACGTGTTGTACCAAGTCCTTGGTGTAATCTTCAAAAGGATCTACCTTCAACCTATCAAGGTATATGAATGAACACCTCGACTGTTCTATATAAACCTACTATGTTCTAAATATCTAATT----TTATATCTTGTACATAATTCGTATTTATAGCTTGTCTTTATTTCCTGTACTGCATTTATGTTTGCATAATAACAACCTGGATTGCCATCCAATTGTCACATACTAATCTCATATCCAAGATTGCATATAGATACTGCATTCCTATTCTCATAT
>IRGSP-1.0:10:8408687:8410513:1
AAGATAATGAATAAAGATCTTGTCATCCCCGACAAAGATCACTATTCAAGATAAGGAATCTACACTATTCCAGATAAGATAAGTTTATGGTCAAAAGGCGATATTATGACATCTTTATTGAAGGTCAAAAGCGTCATCATCAAAGATTCTCTCCATGAAGTCTAAAGGGATATCATGAACTCTTTGAAGTCAAAAAGAGATATCATGAAGATTCTCTACCGAGCGCTATATAAGGGGCTCACTATCACATTTCAGAGGCATCGCCTTCCACACACAACACTTCTCACTCAACCATTCCTCTCACCGCTCCACCAGCCATCACACTCCACTCCACTCCATCTAAGTGTTAG--------TATAACCTAAATAAAATACTCATGAGAGTCTAAGTGTGAGAGTCTATGTAAGAGTCCTTGTGAGAGTCCTGTACCTGTATAATTACGAACGTGTTGTACCAAGTCCTTGGTGTAATCTTCAGAAGGATCTACCTTCAACCTATCAAGGTATATGAATGAACACCTGGACCGTTCTATATAAACCTACTATGTTCTAAATATCTAATT----TTATATCTTGTACATAATTCGTATTTACAGCTTGTCTTTATTTC-TGTACTGCATT-ATGTTTGCATAATAACAACCTGGATTGCCATCCAATTGTCACATACTAATCTCACACCCAAGATTGCATATAGATA-AGCATTCCTATCATCATAT
>IRGSP-1.0:2:11309589:11311418:1
AAGATAATGAATAAAGATCTTGTCATCCCCGACAAAGATCACTATTCAAGATAAGGAATCTACACTATTCCAGATAAGATAAGTCCATAGTCAAAAAGCGATATTATGACATCTTTATTAAAGGTCTAAAGCGTTATCACCAAAGATTCTCTCCATGAAGTCTAAAGGGGTATCATAAACTCTTTAAGGTCAAGAAGAGATATCATGAAGATTCTCTACCGAGCGCTATATAAGGGGCTCACCATCACATTTCACAGGCATCGCATTTCACACACAACACATCTCACTCAACCATTCCTCTCACCTCTCCACCAGCCATCACACTCCACTCCACTCCAACTAAGTGTTAGTACTATAGTAGAACCTAAATAAAAGACTCATGAGAGTCTAAGTGTGAGAGTCTATGTAAGAGTCCTTGTGAGAGTCCTGTACCTGTATAATTACGAACGTGTTGTACCAAGTCCTTGGTGTAATCTTCAGAAGGATCTACCTTCAACCTATCAAGGTATATGAATGAACACCTGGACCGTTCTATATAAACCTATTATGTTCTAAATATCTAATT----TTATATCTTGTACATAATTCGTATTTACAGCTTATCTTTATTTCCTGTACTGCATTCATGTTTGCATAATAACAACCTGGATTGCCATCCAATTGTCACGTACTAATCTCACATCCAAGATTGCATATAGATACTGCATTCCTATCCTCATAT
>IRGSP-1.0:4:23051051:23052909:1
AAGATAATGAATGAAGATCTTGTCATCCCCGACAAAAAACACTATTGAAGATAAGGAATCTACACTATTCAAGATAAGATATGCCTATAGTCAAAAGGCGATATTATGATACTTTTATTGAAGGTCAAAAGCGTCATCACCAAAGATTCTCTCCGTGAAATCTAAAGGGACATCATAAACCCCTTAAAGTCAAATGGATATATCATAAAGATTCTTCACCAAGTCCTATATAAGGGGCTCAGGAACA-----------CAACACA-ACCAAA----ACACATCTCACTCAACCATTCCTCTCACCTCTCCACCAGCCATCACACTTCACTCCACTCCATCTAAGTGTTAGTAGTATAGTATAACCTAAATAGAAGACTTATGAAAGTC-AAGTGTGAGAGTCTATGTAAGAGTCCTTGTGAGAGTCCTGTACATGTATAATTATGAACGTGTTGTACCAAGTCCTTGGTGTAATCTTCAGAAGGATCTATCTTCAACCTATCAAGGTATATGAATGAACACATGGACCATTCTATATAAAACTACCATGTTA-----------------------------------TGGTATTTACAGTTTGTCTTTACTTTATGTACTGCATTTATGTTTGCATAATTACAAACTGGATTACCATCCAGTTGCCACATACCAATCTCACATCCAACATTGCATCTAGATGCTGCATTCCTATCCTCATAT
>AGI1.1:4:26260052:26261915:-1
AAGATAATGAATAAAGATCTTGTCATTCCCGACAAAGATCACTATTCAAGATAAGGAATCTACACTATTCCAGATAAGATAAGTCTATGGTCAAAAGGCGATATTATGACATCTTTACTGAAGGTCAAAAGCGTCATCACCAAAGATTCTCTCCATGAAGTCTAAAGGAATATCATGAACTCTTTGAAGTCAAGAAGAGATATCATGAAGATTCTCTACCGAGCGCTATATAAGGGGCTCACCATCACATTCTAGAGGGATCGCATTTCACACACAACACATCTCACTCAACCATTCCTCTCACCTCTCCACCAGCCATCACACTCCACTCCACTCCATCTAAGTGTTAGTACTATAGTATAACCTAAATAAAAGACTCATGAGAGTCTAAGTGTGAGAGTCTATGTAAGAGTCCTTGTGAGAGTCCTGTACCTGTATAATTACGAACGTGTTGTACCAAGTCCTTGGTGTAATCTTCAGAAGGATCTACCTTCAACCTATCAAGGTATATGAATGAACACCTGGACCGTTCTATATAAACCTACTATGTTCTAAATATCTAATT----TTATATCTTGTACATAATTCGTATTTACATCTTGTCTTTATTTCCTGTACTGCATTTATGTTTGCATAATAACAACCTGGATTGCCATCCAATTGTCACATACTAATCTCACATCCAAGATTGCATATAGATACTGCATTCCTATCCTCATAT
>AGI1.1:6:16938268:16940150:1
AAGATAATGAATAAAGATCTTGTCATTCCCGACAAAGATCACTATTCAAGATAAGGAATCTACACTATTCCAGATAAGATAAGTCTATGGTCAAAAGGCGATATTATGACATCTTTATTGAAGGTCAAAAGCGTCATCACCAAAGATTCTCTCCATGAAGTCTAAAGGGATATCATGAACTCTTTGAAGTCAAGAAGAGATATCATGAAGATTCTCTACCGAGCGCTATATAAGGGGCTCACCATCACACTTCAGAGGCATCGCATTTCACACACAACACATCTCACTCAACCATTCCTCTCACCTCTCCACCAGCCATCATACTCCACTCCACTCCATCTAAGTGTTAGTAATATAGTATAACCTAAATAAAAGACTCATGAGAGTCTAAGTGTGAGAGTCTATGTAAGAGTCCTTGTGAGAGTCCTGTACCTGTATAATTACGAACGTGTTGTACCAAGTCCTTGGTGTAATCTTCAGAAGGATCTACCTTCAACCTATCAAGGTATATGAATGAACACCTGGACCGTTCTATATAAACCTACTATGTTCTAAATATCTAAT-----TTATATCTTGTACATAATTCGTATTTACATCTTGTCTTTATTTCCTGTACTGCATTTATGTTTGCATAATAACAACCTGGATTGCCATCCAATTGTCACATACTAATCTCACATCCAAGATTGCATATAGATACTGCATTCCTATCCTCATAT
>AGI1.1:10:6515115:6516580:1
AAGATAATGAATAAAGATCTTGTCATTCCCGACAAAGATCACTATTCAAGATAAGGAATCTACACTATTCCAGATAAGATAAGTCTATGGTCAAAAGGCGATATTATGACATCTTTACTGAAGGTCAAAAGCGTCATCACCAAAGATTCTCTCCATGAAGTCTAAA-GGATATCATGAACTCTTTGAAGTCAAGAAGAGATATCATGAAGATTCTCTACCGAGCGCTATATAAGGGGCTCACCATCACATTCCAGAGGCATCGCATTTCACACACAACACATCTCACTCAACCATTCCTCTCACCTCTCCACCAGCCATCACACTCCACTCCACTCCATCTAAGTGTTAGTACTATAGTATAACCTAAATAAAAGACTCATGAGAGTCTAAGTGTGAGAGTCTATGTAAGAGTCCTTGTGAGAGTCCTGTACTTGTATAATTACGAACGTGTTGTACCAAGTCCTTGGTGTAATCTTCAGAAGGATCTACCTTCAACCTATCAAGGTATATGAATGAACACCTGGACCGTTCTATATAAACCTACTATGTTCTAAATATCTAATT----TTATATCTTGTACATAATTCGTATTTACAGCTTGTCTTTATTTCCTGTACTGCATTTATGTTTGCATAAAAACAACCTGGATTGCCATCCAATTGTCACATACTAATCTCACATCCAAGATTGCATATAGATACT------------------
>AGI1.1:12:13437516:13438725:1
AAGATAATGAATAAAGATCTTGTCATCCCCGACAAAGATCACTATTCAAGATAAGGAATCTACACTATTCCAGATAAGATAAGTCCATAGTCAAAAGGCGATATTATGACATCTTTATTAAAGGTCTAAAGCGTCATCACCAAAGATTCTCTCCATAAAGTCTAAAGGGGTATCATAAACTCTTTGAGGTCAAGAAGAGATATCATGAAGATTCTCTACCGAGCGCTATATAAGGGGCTCACCATCACATTTCACAGGCATCGCATTTCGCACACAACACATCTCACTCAACCATTCCTCTAACCTCTCCACCAGCCATCACACTCCACTCCACTCCATCTAAGTGTTAGTACTATAGTATAACCTAAATAAAAGACTCATGAGAGTCTAAGTGTGAGAGTCTATGTAAGAGTCCTTGTGAGAGTCCTGTACCTGTATAATTACGAACGTGTTGTACCAAGTCCTTGGTGTAATCTTCAGAAGGATCTACCTTCAACCTATCAAGGTATATGAATGAACACCTGGACCGTTCTATATAAACCTACTATGTTCTAAATATCTAATT----TTATATCTTGTACATAACTCGTATTTACAGCTTGTCTTTATTTCCTGTACTGTATTTATGTTTGCATAATAACAACCTGGATTGCCATCCAATTGTCACATACTAATCTCACATCCAAGATTGCATATAGATACTGCATTCCTATCCTCATAT
>AGI1.1:11:6587461:6588240:-1
AAGATAATGAGTAAAGATCTTATCATTCCCGACAAAGATCACTATTCAAGATAAGGAATCTGCACTATTCCAGATAAGATAAGTCCATAGTCAAAAGGTGATATTATGACATCTTTATTGAAGGTCAAAAGCGTTATCACCGAAGATTCTCTCCATGAAGTCTAAAGAGATATCATGAACTCTTTGAAGTCAAGAAGAGTTATCATGAAGATTCTCTACCGAGCGCTATATAAGGGGCTCACCATCACACTTCAGAGGCATCGCATTTCACACACAACACATCTCACTCAACCATTCCTCTCACCTCTCCACCAGCCATCACACTCCACTCCACTCCATCTAAGTGTTAGTACTATAGTATAACATAAATAAAAGACTCATGAGAGTCTAAGTGTGAGAGTCTATGTAAGAGTCCTTGTGAGAGTCCTGTACCTGTATAATTACGAACGTGTTGTACCAAGTCCTTGGTGTAATCTTCAGAAGGATCTACCTTCAACCTATCAAGGTATATGAATGAACACCTGGACCGTTCTATATAAACCTACTATGTTCTAAATATCTAATT----TTATATCTTGTACATAATTCGTATTTACAGCTTGTCTTTATTTCCTGTACTGCATTTATGTTTGCATAATAACAACCTGGATTGCCATCCAATTGTCATATACTAATCTCACATCCAAGATTGCATATAGATACTGCATTCCTATCCTCATAT
>AGI1.1:4:26253598:26254366:-1
AAGATAATGAGTAAAGATCTTATCATTCCCGACAAAGATCACTATTCAAGATAAGGAATCTGCACTATTCCAGATAAGATAAGTCCATAGTCAAAAGGTGATATTATGACATCTTTATTGAAGGTCAAAAGCATTATCACCGAAGATTCTCTCCATGAAGTCTAAAGGGATATCATGAACTCTTTGAAGTCAAGAAGAGATATCATGAAGATTCTCTACCGAGCGCTATATAAGGGGCTCACCATCACACTTCAGAGGCATCGCATTTCACACACAACACATCTCACTCAACCATTCCTCTCACCTCTCCACCAGCCATCACACTCCACTCCACTCCATCTAAGTGTTAGTACTATAGTATAACCTAAATAAAAGACTCATGAGAGTCTAAGTGTGAGAGTCTATGTAAGAGTCCTTGTGAGAGTCCTGTACCTGTATAATTACGAACGTATTGTACCAAGTCCTTGGTGTAATCTTCAGAAGGATCTACCTTCAACCTATCAAGATATATGAATGAACAGCTGGACCGTTCTATATAAACCTACTATGTTCTAAATATCTAATT----TTATATCTTGTACATAATTCGTATTTACAGCTTGTCTTTATTTCCTGTACTGCATTTATGTTTGCATAAAAACAACCTGGATTGCCATCCAATTGTCACATACTAATCTCACATCCAAGATTGCATATAGATACTGCATTCCTATCCTCATAT
>AGI1.1:Oglab02_unplaced013:17967:18712:-1
AAGATAATGAGTAAAGATCTTGTCATTCCCGACAAACATCACTATTCAAGATAAGGAATCTACACTATTCCAGATAAGATAAGTCCATGGTCAAAAGGCGATATTATGACATCTTTATTGAAGGTCAAAAGCGTCATCACCAAAGATTCTCTCCATAAAGTCTAAAGGGATATCATGAACTCTTTGAAGTCAAGAAGAGATATCATGAAGATTCTCTACCGAGCGCTATATAAGGGGCTCACCATCACACTTCAGAGGCATCGCATTTCACACACAACACATCTCACTCAACCATTCCTCTCACCTCTCCACCAGCCATCATACTCCACTCCACTCCATCTAAGTGTTAGTACTATAGTATAACCTAAATAAAAGACTCATGAGAGTCTAAGTGTGAGAGTCTATGTAAGAGTCCTTGTGAGAGTCCTGTACCTGTATAATTACGAACATGTTGTACCAAGTCCTTGGTGTAATCTTCAGAAGGATCTACCTTCAACCTATCAAGGTATATGAATGAACACCTGGACCGTTCTATATAAACCTACTATGTTCTAAATATCTAATT----TTATATCTTGTACATAATTCGTATTTATAGCTTGTTTTTATTTCCTGTACTGCATTTATGTTTGCATAATAACAACCTGGATTGCCATCCAATTGTCACATACTAATCTCACATCCAAGATTGCATATAGATACTGCATTCCTATCCTCATAT
>AGI1.1:11:9219494:9220057:-1
AAGATAATGAATAAAGATCCTGTCATCCCCGACAAAGATCACTATTCAAGATAAGGAATCTACACTATTCCAGATAAGATAAGCCTATAGTCAAAAGGCGATATTATGACATCTTTATTAAAGGTCAAAAGCGTCATCACCAAAGATTCTCTCCATGAAGTCTAAAGGGATATCATAAACTCTTTGAAGTCAAGAAGAGATATCATGAAGATTCTCTACCGAGTGCTATATAAGGGGCTCACCATCACATTCCACAAGCATCGCATTTCACACACAACACATCTCACTCAACCATTCCTCTCGCCTCTCCACCAGCCATCACACTCCACTCCACTCCACCTAAGTGTTTGTACTATAGTATAACCTAAATAAAAGACTCATGAGAGTCTAAGTGTGAGAGTCTATGTAAGAGTCCTTGTGAGAGTCCTGTACCTGTATAATTACGAACGTGTTGTACCAAGTCCTTGGTGTAATCTTCAGAAGGATCTACCTTCAACTTATCAAGGTATATGAATGAACATCTGGACCGTTCTATAAAAACCTACTATGTT---------------------------------------------------------------------------------------------------------------------------------------------------------------------------
>AGI1.1:5:15494168:15494717:-1
AAGATAATGAGTAAAGATCTTGTCATTCCCGACAAAGATCACTATTCAAGATAAGGAATCTACACTATTCCAGATAAGATAAGTCCATGGTCAAAAGGCGATATTATGACATCTTTATTGAAGGTCAAAAGCGTCATCACCAAAGATTCTCTCCATAAAGTCTAAAGGGATATCATGAACTCTTTGAAGTCAAGAAGAGATATCATGAAGATTCTCTACCGAGCGCTATATAAGGGGCTCACCATCACACTTCGGAGGCATCGCATTTCACACACAACACATCCCACTCAACCATTCCTCTCACCTCTCCACCAGCCATCACACTCCACTCCACTCCATCTAAGTGTTAGTACTATAGTATAACCTAAATAAAAGA-TCATGAGAGTCTAAGTGTGAGAGTCTATGTAAGAGTTCTTGTGAGAGTCTTGTACCTGTATAATTACGAACGTGTTGTACCAAGTCCTTGGTGTAATCTTCAGAAGGATCTACCTTCAACCTATGAAGGTATATGAATGAACACCTGGACCGTTCTATATAAACCTACTATGTT---------------------------------------------------------------------------------------------------------------------------------------------------------------------------
>AGI1.1:7:7764195:7764924:1
AAGATAATGAGTAAAGATCTTATCATTCCCGACAAAGATCACTATTCAAGATAAGGAATCTGCACTATTCCAGATAAGATAAGTCCATAGTCAAAAGGTGATATTATGACATCTTTATTGAAGGTCAAAAGCGTTATCACCGAAGATTCTCTCCATGAAGTCTAAAGAGATATCATGAACTCTTTGAAGTCAAGAAGAGATATCATGAAGATTCTCTACCGAGCGCTATATAAGGGGCTCACCATCACACTTTAGAGGCATCGCATTTCACACACAACACATCTCACTCAACCATTCCTCTCACCTCTCCACCAGCCATCACACTCCACTCCACTCCATCTAAGTGTTAGTACTATAGTATAACCTAAATAAAAGACTCATGAGAGTCTAAGTGTGAGAGTCTATGGAAGAGTCCTTGTGAGAGTCCTGTACCTGTATAATTACGAACGTATTGTACCAAGTCCTTGGTGTAATCTTCAGAAGGATCTACCTTCAACCTATCAAGGTATATGAATGAACACCTGGACCGTTCTATATAAACCTACTATGTTCTAAATATCTAATT----TTATATCTTGTACATAATTCGTATTTACAGCTTGTCTTTATTTCTTGTACTGCATTTATGTTTGCATAAAAACAACCTGGATTGCCATCCAATTGTCACATACTAATCTCACATCCAAGATTGCATATAGATACTGCATTCCTATCCTCATAT
>ABRL00000000:4:16453251:16455114:1
AAGATAATGAATGAAGATCTTGTCATCCCCGACAAAAAACACTATTGAAGATAAGGAATCTACACTATTCAAGATAAGATATGCCTATAGTCAAAAGGCGATATTATGATACTTTTATTGAAGGTCAAAAGCGTCATCACCAAAGATTCTCTCCGTGAAGTCTAAAGGGATATCATAAACCCCTTAAAGTCAAATGGAGATATCATAAAGATTCTTCACCAAGTCCTATATAAGGGGCTCAGGAACA-----------CAACACA-ACCACA----ACACATCTCACTCAACCATTCCTCTCACCTCTCCACCAGCCATCACACTTCACTCCACTCCATCTAAGTGTTAGTAGTATAGTATAACCTAAATAGAAAACTTATCAAAGTC-AAGGGTGAGAGTTTATATAAGAGTCCTTGTGAGAGTCCTGTACATGTATAATTATGAACGTGTTGTACCAAGTCCTTGGTGTAATCTTCAGAAGGATCTATCTTCAACCTATCAAGGTATATGAATGAACACATGGACCATTCTATATAAAACTACCATGTTA-----------------------------------TGGTATTTACAGTTTGTCTTTACTTTATGTACTGCATTTATGTTTGCATAATTACAAACTGGATTACCATCCAGTTGCCACATACCAATCTCACATCCAACATTGCATCTAGATGCTGCATTCCTATCCTCATAT
>ABRL00000000:4:16452156:16452825:-1
AAGATAATGAATGAAGATCTTGTTATCCTCGACAAAAAACACTATTGAAGATAAGGAATCTACACTATTCAAGATAAGATATGCCTATAGTCAAAAGGCGATATTATGATACTTTTATTGAAGGTCAAAAGCGTCATCACCAAAGATTCTCTCCGTGAAGTCTAAAGGGATATCATAAACCCCTTAAAGTCAAATGGAGATATCATAAAGATTCTTCACCAAGTCCTATATAAGGGGCTCAGGAACA-----------CAACACA-ACCACA----ACACATCTCACTC-ACCATTCCTCTCACCTCTCCACCAGCCATCACACTT-----CACTCCATCTAAGTGTTAGTAGTATAGTATAACCTAAATAAAAGACTCATGAGAGTCTAAGTGTGAGAGTCTATGTAAGAGTCCTTGTGAGAGTCNTGTACCTGTATAATTACGAACGTGTTGTACCAAGTCCTTGGTGTAATCTTCAGAAGGATCTACCTTCAACCTATCAAGGTATATGAATGAACACATGGACCGTTCTATATAAAACTACTATGTTCTAAGTATCTAATTTACATTATGTCTTGTACATAATTGGTATTTACCGTTTGTCTTTACTTTCTGTACTGCATTTATGTTTGCATAGAACCAAACTGGATTACCATCCA--------------------------------------------------------------
>AVCL00000000:3:1870791:1872656:-1
AAGATAATGAATAAAGATCTTGTCATCCCCGACAAAGATCACTATTCAAGATAAGGAATCCACACTATTCAAGATAAGATATGCCTATAGTCAAAAGGCGGTATTATGACATCTTTATTGAAAGTCAAAAGTGTCATCACCAAATATTCTCTCCGCGAAGTCTAAAGGGATATCATAAAACCCTTGAAGTCAAATGAAGATATCATGAAGATTCTTCGCCAAGTCCTATATAAGGGGCTCAAGAGCATTCATCAGAAAAACCGCAATCAACGCACAACACAACACACACAACCATTCCTCTCACCTCTCCACCAGCCATCACACTCCACTCCACTCCATCTAAGTGTTAGTAATATAGTATAACCTAAATAAAAGAGTCATGAGAGTCTAAGTGTGAGAGTCTATGTAAGAGTCCTTGTGAGAGTCATGTACCTGTATAATTACGAACGTATTGTACCAAATCCTTGGTGTAATCTTCAGAAGGATCTACCTTCAACCTATCAAGGTATATGAATGAACACCTGGACTGTTTTATATAAACCTTCTATGTTCTAAGTATCTAATTTACATTATGTGTTGTACATAGTTAATATTTTCAGCTTGTCTTTATTTCCTGTACTGCATTTATGTTTGCATCATAAAAACCTGGATTACCATCCAGCTGCCATATACTGATCTTACATCCAAGATTGCATATAGACACTGCATTCCTATCCTCATAT
>AVCL00000000:7:14512234:14512988:-1
---------------GATCTTGTCATCCCCGACAAAGATCACTATTCAACATAAGGAATCTACACTATTCAAGATAAGATATGCCTATAGTCAAATGGCGATATTATGACATCTTTATTAGGAGTCAAAAGTGTCATCACCAAATATTCTCTCCGCGAAGTCTAAAGGGATATCATAAATCCCTTGAAGTCAAGAGAAGATATCATGAAGATTCTTCGCCAAGTCCTATATAAGGGGCTCAGAGGCATCGCTCAAGAGAATCGC--TCAACACCACACACACAACACACAACCATTCCTCTCACCTCTCCACCAGCCATCACACTC-----CACTCCATCTAAGTATTAGTAATATAGTATAAGCTAAATAAAAGACTCATGAGAGTCTAAGTGTGAGAGTCTATATAAGAGTCCTTGTGAGAGTCCTGTACCTGTATAATTACGAACGTATTGTACCAAGTCCTTGGTCTAATCTTCAGAAGGAACTACCTTCAACCTATCAAGGTATATGAATGAACACCTGGACTGTTTTATATAAACATACTATGTTCTAAGTATCTAATTTATGTTATGCACTGTACATAGTT---ATTTTCAGCTTGCCTTTATTTCCTGTACTGCATTTATGTTCGCATAAAAAAAAACTGGATTACCATCCAGCTGCCATATACCAATCTCACATCCAAGATTGCATATAGACG-TGCATTCCTATCCTCATAC
>AVCL00000000:12:17239641:17241510:-1
AAGATAATGAATAAAGATCTTGTCATCCCCGACAAAGATCACTATTCAAGATAAGGAATCCACACTATTCAAGATAAGATATGCCTATAGTCAAAAGGCGGTATTATGACATCTTTATTGAAAGTCAAAAGTGTCATCACCAAATATTCTCTCCGCGAAGTCTAAAGGGATATCATAAAACCCTTGAAGTCAAATGAAGATATCATGAAGATTCTTCGCCAAGTCCTATATAAGGGGCTCAAGAGCATTCATCAGAAAAACCGCAATCAACGCACAACACAACACACACAACCATTCCTCTCACCTCTCCACCAGCCATCACACTCCACTCCACTCCATCTAAGTGTTAGTAATATAGTATAACCTAAATAAAAGAGTCATGAGAGTCTAAGTGTGAGAGTCTATGTAAGAGTCCTTGTGAGAGTCATGTACCTGTATAATTACGAACGTATTGTACCAAATCCTTGGTGTAATCTTCAGAAGGATCTACCTTCAACCTATCAAGGTATATGAATGAACACCTGGACTGTTTTATATAAACCTTCTATGTTCTAAGTATCTAATTTACATTATGTGTTGTACATAGTTAATATTTTCAGCTTGTCTTTATTTCCTGTACTGCATTTATGTTTGCATCATAAAAACCTGGATTACCATCCAGCTGCCATATACTGATCTTACATCCAAGATTGCATATAGACACTGCATTCCTATCCTCATAT
>AVCL00000000:1:36467665:36468381:1
---------------GATCTTGTCATCCCCGACAAAGATCACTATTCAAGATAAGGAATCTACACTATTCG-GATAAGATATGCCTATAGTCAAAAGACGGTACTATGACATCTTTATTGGAGGTCAAAAGCGTCATCACCAAAGATTCTCTCCGTAAAGTCTAAAGGGATATCATAAACCCCTTGAAGTCAAATGAAGATATCATGAAGATTCTTCGCCAAGTCCTATATAAGGGGCTCAAGATCGCATCGCATT--CATCGCATTCCACAGACAACACATCTCACTCAACCATTCCTCTCACCTCTCCACCAGCCATCACACTCCACTCCACTCCATCTAAGTGTTAGTACTATAGTATAACATAAATAAAAGACTCATGAGAGTCTAATTATGAGAGTCTATGTAAGAGTCCTTGTGAGAGTCCTGTACCTGTATAATTACGAACGTATTGTATCAAGTCCTTGGTGTAATCTTCAGAAGGATCTATCTTCAACCTATCAAGGTATATGAATGAACACCTGGACTGTTTTATATAAACCTACTATGTTCTAACTATCTAATTTACATTATGTGTTGTACATAATTAGTATTTACAGCTTGTCTTTCTTTCCTGTACTACATTTATGTTTACATAAAAAAACCCTGGATTATCATCCAGCTGCCATACATTGATCTCACATCCAAGATTGCATATAGATACTGTATTCCTATCCTCATAT
>AVCL00000000:2:18176496:18178269:1
AAGATAATGAATAAAGATCTTTTCATCCCCGACAAAGATCACTATTCAAGATAAGGAATCTACACTATTCGAGATAAGATATGCCTATAGTC-AAAGGCGGTATTATGACATCTTTATTGAAGGTCGAAAACGTCATCACCAAATATTCTCTCCGTGGAGTCTAAAGGGATATCATAAACCCCTTGAAGTCAAATGAAGACATCATGAAGATTATTGGCCAAGTCCTATATAAGGGGCTCAAGACCATATCTTCAGGGCATCGCATTCCACAGACAACACATCTCACTCAACCATTCCTCTCACCTCTCCACCAGCCATCACACTCCACTCCACTCCATCTAAGTGTTAGTACTATAGTATAACATAAATAAAAGACTCATGAGAGTCTAAGTGTGAGAGTCCATGTAAGAGTCCTTATGCGAGTCCTGTACCTGTATAATTACGAACGTATTGTACCAAGTCCTTGGTGTAATCTTCAGAAGGATTTACCTTCAACCTATCAAGGTATATGAATGAGCACCTGGACTGTTTTATATAAACCTACTATGTTCTAAGTATCTAATTTACATTATGTGTTGTACATAATTAGTATTTACAGCTAGTCTTTGTTTCCTGTACTGCATTTATGTTTGCATAATTAAAACCTGGATTACCATCTAGCTGCCATATTGTGATCTCACATCCAAGATTGCATATAGATACTGCATTCCTATCCTCATAT
>AVCL00000000:2:18180696:18182535:1
AAGATAATGAATAAAGATCTTGTCATCCCCGACAAAGATCACTATTCAAGATAAGGAATCTACATTATTCGATATAAGATATGCC------------GCGGTATTATGACATCTTTATTGAAGGTCGAAAACGTCATCACCAAATATTCTCTCCGTGGAGTCTAAAGGGATATCATAAACCCCTTGAAGTCGAATGAAGACATTATGAAGATTCTTCGCCAAGTCCTATATAAGGGGCTCAAGACCACATCTTCAGGGCATCGCATTCCACAGACAACACATCTCACTCAACCATTCCTCTCACCTCTCCACCAGACATCACACTCCACTCCACTCCATCTAAGTGTTAGTACTATAGTATAACCTAAATAAAAGACTCATGAGAGTCTAAGTGTGAGAGTCCATGTAAGAGTCCTTGTGAGAGTCCTGTACCTGTATAATTACGAACGTATTGTACGAAGTCCTTGGTGTAATCTTCAGAAGGATTTACCTTCAACCTATCAAGGTATATGAATGAGTACCTGGACTGTTTTATATAAACCTACTATGTTCTAAGTATCTAATTTACATTATGTGTTGTACATAATTAGTATTTACAGCTTGTCTTTATTTACTGTACTACATTTATGTTTGCATAATAAAAACCTGGATTACCATCTAGCTACCATATACTGATCTCACATTCAAGATTGCATCTAGATATTGCATTCCTATCCTCATAT
>AVCL00000000:7:14019803:14021665:1
AAGATAATGAATAAAGATCTTGTCATCCCCGACAAAGATCACTATTCAAGATAAGGAATCTACACTATTCGATATAAGATATGCCTATAGTC-AAAGGTGGTATTATGATATCTTTATTGAAGGTCAAAAGCGTCATCACCAAAGATTCTCTCCGTGGAGTCTAAAGGGATATCATAAACCTCTTGAAGTCAAATGAAGACATCATGAAGATTCTTCGCCAAGTCCTATATAAGGGGCTCAAGACCATATCTTTAGGGCATCGCATTCCACAGACAACACATCTCACTCAACCATTCCTCTCACCTCTCCACCAGCCATCACACTCCACTCCACTTCATCTAAGTGTTAGTACTATAGGATAACCTAAATAAAAAACTCATGAGAGTCTAAGTGTGAGAGTCTATGTAAGAGTCCTT------------TACCTGTATAATTACGAACGTATTGTACCAAGTCCTTGGTGTAATCTTCAGAAGGATCTACCTTCAACCTATCAAGGTATATGAATGAACACCTGGACTGTTTTATATAAACCTACTATGTTCTAAGTATCTAATTTACATTATGTGTTATACATAATTAGTATTTACAGGTTGTCTTTATTTCCTGTACTGCATTTATGTTTGCATAATAAAAACCTAGATTACCATCCAGCTGCCATATACTGATCTCACATCCAAGATTGCATATAGATACTGCATTCCTATCCTCATAT
>AVCL00000000:9:2493061:2494903:1
AAAATAATGAATAAAGATCTTATCATCCCTGATAAAAATCACTATTGAAGATAAGGAATCTACACTATTCGAGATAAGATATTCCTATAGTCAAAAGACGGTATTATGACATCTTTATTGAAAGTCAAAAGCGTCAACACCAAAGATTCTCTCCGTGAAGTCTAAAGGGATATCATAAACCCCTTGAAGTCAAATGAAGATATCATGAAGATTCTTTGCCAAGTCCTATATAAGGGGCTCAAGAGCATTCATCGCAAGCATCGCATTCCACACAAAACACATCTCACTCAACCATTCCTGTCACCTCTCCACCAGCCATCACACTCCACTCCACTCCATCTAAGTGTTGGTACAATAGTATAACCTAAATAAAAGACTCATGAGAGTCTAAGTGTGAGAGTCTATGTAAGAGTCCTTGTGAGAGTCCTGTACCTGTATAATTACGAACGTATTGTACCAAGTCCTTGGTGTAATCTTCAGAAGGATCTACCTTCAACCTATCGAGGTATATGAATGAACGCCTGGACTGTTTTATATAAACCTATTATGTTCTAAGTATCTAATTTACATTATGTGTTGTACATAATTCGGATTTACAGCTTGTCTTTATTTCCTGTACTGCATTTATGTTTGCATAATAAAAATATATATTACCATCCAGCTGCCATATACTGATCTCACATCCAAGATTGCATATAGACACTGCATTCCTATCCTCATAT
>AVCL00000000:9:2508245:2509261:1
AAAATAATGAATAAAGATCTTATCATCCCTGATAAAAATCACTATTGAAGATAAGGAATCTACACTATTCGAGATAAGATATTCCTATAGTCAAAAGACGGTATTATGACATCTTTATTGAAAGTCAAAAGCGTCAACACCAAAGATTCTCTCCGTGAAGTCTAAAGGGATATCATAAACCCCTTGAAGTCAAATGAAGATATCATGAAGATTCTTTGCCAAGTCCTATATAAGGGGCTCAAGAGCATTCATCGCAAGCATCGCATTCCACACAAAACACATCTCACTCAACCATTCCTGTCACCTCTCCACCAGCCATCACACTCCACTCCACTCCATCTAAGTGTTGGTACAATAGTATAACCTAAATAAAAGACTCATGAGAGTCTAAGTGTGAGAGTCTATGTAAGAGTCCTTGTGAGAGTCCTGTACCTGTATAATTACGAACGAATTGTACCAAGTCCTTGGTGTAATCTTCAGAAGGATCTACCTTCAACCTATCAAGGTATATGAATGAACACCTGGACTATTTTACATAAACCTACTATGTTCTAAGTATCTAATTTACATTTTGTGTTGTACATAATTAGTATTTACAGCTTGTCTTTATTTCCTGTACTGCATTTATGTTTGCATAAAAA--------AATACCATCCAGCTGCCATATACTAATCTCACATCCAATATTGCATATAGACACTGCATTCCTATCCTCATAT
>AVCL00000000:9:2513864:2515541:1
AAGATAATGAATAAAGATCTTGTCATACCCGACAAAGATCACTATTCAAGATAAGGAATCTACACTATTCGAGATAAGATATGCCTATAGTCAAAAGGTGGTATTATGACATCTTTATTGAAAGTCAAAAGCGTCATCACTAAA-----------------------GGATATCATAAACTCCTTGAAGTCAAATGAAGATATCATGAAGATTCTTCGCCAAGTCCTATATAAGGGGCTCAAGACCATGAACCGCGATCATCGCATTCCACAGACAACACATCTCACTCAACCATTCCTTTCACCTCTCCACCAGCCATCACACTCCACTCCACTCCATCTAAGTGTTAGTACTATAGTATAACCTAAATAAAAGACTCATGAGAGTCTAAGTGTGAGAGTCTATGTAAGAGTCCTTGTGAGAGTCTTGTACCTGTATAATTACGAACGTATTGTACCAAGTCCTTGGTGTAATCTTCAGAAGGATCTACCTTCAACCTATCGAGGTATATGAATGAACGCCTGGACTGTTTTATATAAACCTATTATGTTCTAAGTATCTAATTTACATTATGTGTTGTACATAATTCGGATTTACAGCTTGTCTTTATTTCCTGTACTGCATTTATGTTTGCATAAT-----------------------------------------------------------------------------------
>AVCL00000000:12:17249456:17250239:1
---------------GATCTTGTCCTCCCCGACAAAGATCACTATTCAAGATAAGGAATCTACACTATTCGAGATAAGATATGCCTATGGTCAAAAGGCGGTATTATGACATCTTTATTGAAAGTCAAAAGTGTCATCACCAAAGATTCTCTCCGTGAAGTCTAAAGGGATATCATAAACCCCTTGAAGTCAAATGAAGATATCATGAAGATTCTTCGCCAAGTCCTATATAAGAGGCTCAAGAGCATTCATCGGAGGCACCGCAATCAACGCACAACACAACACACACAACCATTCCTCTCACCTCTCCACCAGCCAACACACTCCACTCCACTCCATCTAAGTGTTAGTAATATAGTATAACCTAAATAAAAGACTCATGAGAGTCTAAGTGTGAGAGTCTATGTAAGAGTCCTTGTGAGAGTCCTGCACCTATATAATTACGAACGTATTGTACCAAATCCTTGGTGTAATCTTCAGAAGGATCTACCTTCAACCTATCAAGGTATATGAATGAACACCTGGACTGTTTTATATAAATCTACTATGTTCCAAGTATCTAATATACATTATGTGTTATACATAGTTAATATTTTCAGCTTGTCTTTATTTCCTGTACTGCATTTATGTTTGCATCATAAAAACCTGGATTACCATCCAGCTGCCATATACTGATCTTACATCCAAGATTGCATATAGACACTGCATTCCTATCCTCATAT
>ALNU02000000:4:20425145:20425815:-1
AAGATAATGAATGAAGATCTTGTTATCCTCGACAAAAAATACTATTGAAGATAAGGAATCTACACTATTCAAGATAAGATATGCCTATAGTCAAAAGGCGATATTATGATACTTTTATTGAAGGTCAAAAGCGTCATCACCAAAGATTCTCTCCGTGAAGTCTAAAGGGATATCATAAACCCCTTAAAGTCAAATGGAGATATCATAAAGATTCTTCACCAAGTCCTACATAAGGGGCTCAGAAACA-----------CAACACA-ACCACA----ACACATCTCACTCAACCATTCCTCTCACCTCTCTACCAGCCATCACACTT-----CACTCCATCTAAGTGTTAGTAGTATAGTATAACCTAAATAAAAGACTTATGAAATTCTAAGTGTGAGAGTCTATGTAAGAGTCCTTGTGAGAGTCATGTACCTGTATAATTACGAACGTGTTGTACCAAGTCCTTGGTGTAATCTTCAGAAGGATCTACCTTCAACCTATCAAGGTATATGAATGAACACATGGACCGTTCTATATAAAACTACTATGTTCTAAGTATCTAATTTACATTATGTCTTGTACATAATTGGTATTTACCGTTTGTCTTTACTTTCTGTACTGCATTTATGTTTTCATAGAACCAAACTGGATTACCATCCA--------------------------------------------------------------
>ALNU02000000:4:20426241:20428090:1
AAGATAATGAATGAAGATCTTGTCATCCCCGACAAAAAACACTATTGAAGATAAGGAATCTACACTATTCAAGATAAGATATGCCTATAGTCAAAAGGCGATATTATGATACTTTTATTGAAGGTCAAAAGCGTCATCACCAAAGATTCTCTCCGTGAAGTCTAAAGGGATATCATAAACCCCTTAAAGTCGAATGGATATATAATAAAGATTCTTCACCAAGTCCTATATAAGGGGCTCAGGAACA-----------CAACACA-ACCACA----ACACATCTCACTCAACCATTCCTCTCACCTCTCCACCAGCCATCACACTTCACTCCACTCCATCTAAGTGTTAGTAGTATAGTATAACCTAAATAGAAGACTTATGAAAGTC-AAGTGTGAGAGTTTATGTAAGAGTCCTTGTGAGAGTCCTGTACATGTATAATTATGAACGTGTTGTACCAAGTCCTTGGTGTAATCTTCAGAAGGATCTATCTTCAACCTATCAAGGTATATGAATGAACACATGGACCATTCTATATAAAACTACCATGTTATG-----------------------------------GTATTTACAGTTTGTCTTTACTTTATGTACTGCATTTATGTTTGCATAATTACAAACTGGATTACCATCCAGTTGCCACATACCAATCTCACATCCAACATTGCATCTAGATGCTGCATTCCTATCCTCATAT
>ALNU02000000:3:4729510:4730674:1
AAGATAATGAATAAAGATCCTGTCATCCCCGACAAAGATCACTATTCAAGATAAGGAATCTACACTATTCCAGATAAGATAAGTCCATAGTCAAAAGGCGATATTATGACATCTTTATTAAAGGTCTAAAGCGTCATCACCAAAGATTCTCTCCATGAAGTCTAAAGGGGTATCATAAACTCTTTGAGGTCAAGAAGAGATATCATGAAGATTCTCTACCGAGCGCTATATAAGGGGCTCACCATCACACTTCACAGGCATCGCATTTCACACACAACACATCTCACTCAACCATTCCTCTCACCTCTCCACCAGCCATCACACTCCACTCCACTCCATCTAAGTGTTAGTACTATAGTATAACCTAAATAAAAGATTCATGAGAGTCTAAGTGTGAGAGTCTATGTAAGAGTCCTTGTGAGAGTCATGTACCTGTATAATTACGAACGTGTTGTACCAAGTCCTTGGTGTAATCTTCAGAAGGATCTACCTTCAACCTATCAAGGTATATGAATGAACACCTGGAACGTTCTATATAAACCTACTATGTTCTAAATATCTAATT----TTATATCTTGTACATAATTCGTATTTATAGCTTGTCTTTATTTCCTGTACTGCATTTATGTTTGCATAATAACAACCTGGATTGCCATCCAATTGTCACAAACT--TCTCACATCCAAGATTGCATATAGATACTGCATTCCTATCCTCATAT

##eRTBVL sequences are extracted according to the prvious study [14]
