# Supplementary material
Source: publisher figshare collection journal article supplement (https://plos.figshare.com/articles/dataset/_/5160220)
Supplement: Supplementary file 1 [file 1 › S3 Table.pdf]

S3 Table. Detailed information on ePVCVL and ePVCVL2 segments in grass genomes.

| Grass species        | Family  | Segment name | Position in grass genomes |        |          |          | Position in virus genome |      | Length (bp) |
|----------------------|---------|--------------|---------------------------|--------|----------|----------|--------------------------|------|-------------|
|                      |         |              | Chromosome/scaffold       | Strand | Start    | End      | Start                    | End  |             |
| <i>O. sativa</i>     | ePVCVL  | ePVCVL-OS1   | 1                         | +      | 8840504  | 8847149  | 4                        | 6589 | 6646        |
|                      |         | ePVCVL-OS2   | 1                         | -      | 23908392 | 23902732 | 967                      | 6643 | 5661        |
|                      |         | ePVCVL-OS3   | 1                         | -      | 34125359 | 34121219 | 1488                     | 5638 | 4141        |
|                      |         | ePVCVL-OS4   | 1                         | +      | 34125360 | 34126305 | 459                      | 1404 | 946         |
|                      |         | ePVCVL-OS5   | 2                         | +      | 11304753 | 11311418 | 1                        | 6650 | 6666        |
|                      |         | ePVCVL-OS6   | 2                         | -      | 11312045 | 11311420 | 1                        | 624  | 626         |
|                      |         | ePVCVL-OS7   | 3                         | +      | 22472858 | 22472966 | 5056                     | 5164 | 109         |
|                      |         | ePVCVL-OS8   | 3                         | +      | 22472973 | 22474562 | 5056                     | 6650 | 1590        |
|                      |         |              |                           |        | 22474563 | 22474682 | 1                        | 122  | 120         |
|                      |         | ePVCVL-OS9   | 3                         | -      | 22478535 | 22474683 | 582                      | 4442 | 3853        |
|                      |         | ePVCVL-OS10  | 4                         | -      | 23050761 | 23049961 | 5296                     | 6549 | 801         |
|                      |         | ePVCVL-OS11  | 4                         | +      | 23051051 | 23052842 | 4835                     | 6650 | 1792        |
|                      |         |              |                           |        | 23052843 | 23052909 | 1                        | 66   | 67          |
|                      |         | ePVCVL-OS12  | 6                         | -      | 2756800  | 2756579  | 1                        | 262  | 222         |
|                      |         | ePVCVL-OS13  | 7                         | +      | 11608404 | 11609584 | 1821                     | 3001 | 1181        |
|                      |         | ePVCVL-OS14  | 8                         | +      | 25041604 | 25041978 | 6258                     | 6650 | 375         |
|                      |         | ePVCVL-OS15  | 8                         | -      | 25047553 | 25041981 | 271                      | 5829 | 5573        |
|                      |         | ePVCVL-OS16  | 9                         | +      | 20408412 | 20408865 | 62                       | 515  | 454         |
|                      |         | ePVCVL-OS17  | 9                         | +      | 20415024 | 20421219 | 510                      | 6611 | 6196        |
|                      |         | ePVCVL-OS18  | 9                         | -      | 21426023 | 21423510 | 4191                     | 6650 | 2514        |
|                      |         | ePVCVL-OS19  | 9                         | -      | 21431914 | 21430262 | 2545                     | 4198 | 1653        |
|                      |         | ePVCVL-OS20  | 9                         | -      | 21432081 | 21431915 | 5168                     | 5350 | 167         |
|                      |         | ePVCVL-OS21  | 10                        | +      | 8405909  | 8410510  | 2057                     | 6650 | 4602        |
|                      |         | ePVCVL-OS22  | 11                        | +      | 8293415  | 8299957  | 69                       | 6646 | 6543        |
|                      |         | ePVCVL-OS23  | 11                        | -      | 28547732 | 28541508 | 23                       | 6650 | 6225        |
|                      |         | ePVCVL-OS24  | 11                        | -      | 28591917 | 28585691 | 23                       | 6650 | 6227        |
|                      | ePVCVL2 | ePVCVL2-OS1  | 1                         | -      | 8849149  | 8847147  | 3967                     | 5968 | 2003        |
|                      |         | ePVCVL2-OS2  | 2                         | -      | 11313137 | 11312114 | 3310                     | 4333 | 1024        |
|                      |         | ePVCVL2-OS3  | 2                         | -      | 11313900 | 11313138 | 31                       | 800  | 763         |
|                      |         | ePVCVL2-OS4  | 2                         | +      | 11313901 | 11314199 | 357                      | 685  | 299         |
|                      |         | ePVCVL2-OS5  | 5                         | -      | 20231116 | 20224846 | 64                       | 6426 | 6271        |
|                      |         | ePVCVL2-OS6  | 7                         | -      | 11604767 | 11601272 | 2749                     | 6527 | 3496        |
|                      |         | ePVCVL2-OS7  | 7                         | +      | 11604768 | 11605869 | 271                      | 1385 | 1102        |
|                      |         | ePVCVL2-OS8  | 7                         | -      | 27575480 | 27572485 | 3558                     | 6558 | 2996        |
|                      |         |              |                           |        | 27572484 | 27571939 | 1                        | 561  | 546         |
|                      |         | ePVCVL2-OS9  | 11                        | -      | 11865464 | 11860427 | 1222                     | 6435 | 5038        |
|                      |         | ePVCVL2-OS10 | 11                        | +      | 19845104 | 19848248 | 3385                     | 6366 | 3145        |
|                      |         | ePVCVL2-OS11 | 12                        | +      | 19505111 | 19511369 | 42                       | 6356 | 6259        |
| <i>O. glaberrima</i> | ePVCVL  | ePVCVL-OG1   | 1                         | -      | 24848084 | 24847398 | 4731                     | 5417 | 687         |
|                      |         | ePVCVL-OG2   | 1                         | -      | 24850826 | 24849905 | 2675                     | 3596 | 922         |
|                      |         | ePVCVL-OG3   | 4                         | -      | 15508021 | 15507736 | 6265                     | 6549 | 286         |
|                      |         | ePVCVL-OG4   | 4                         | -      | 15508460 | 15508338 | 5314                     | 5437 | 123         |
|                      |         | ePVCVL-OG5   | 4                         | +      | 15508778 | 15510896 | 4835                     | 6650 | 2119        |
|                      |         |              |                           |        | 15510897 | 15510963 | 1                        | 66   | 67          |
|                      |         | ePVCVL-OG6   | 4                         | -      | 26265352 | 26260099 | 1663                     | 6650 | 5254        |
|                      |         | ePVCVL-OG7   | 4                         | +      | 26265353 | 26265878 | 1048                     | 1592 | 526         |
|                      |         | ePVCVL-OG8   | 6                         | +      | 16933152 | 16940095 | 54                       | 6650 | 6944        |
|                      |         |              |                           |        | 16940096 | 16940152 | 1                        | 57   | 57          |
|                      |         | ePVCVL-OG9   | 10                        | +      | 6511230  | 6516580  | 1434                     | 6593 | 5351        |
|                      |         | ePVCVL-OG10  | 10                        | +      | 8397190  | 8401147  | 734                      | 4471 | 3958        |

|                   |         |              |                     |  |   |          |          |      |      |      |
|-------------------|---------|--------------|---------------------|--|---|----------|----------|------|------|------|
|                   |         | ePVCVL-OG11  | 10                  |  | + | 8403814  | 8405594  | 4466 | 6246 | 1781 |
|                   |         | ePVCVL-OG12  | 11                  |  | + | 6585334  | 6587452  | 2334 | 4453 | 2119 |
|                   |         | ePVCVL-OG13  | 11                  |  | - | 15893636 | 15893277 | 4663 | 5023 | 360  |
|                   |         | ePVCVL-OG14  | 11                  |  | + | 15893637 | 15894763 | 1170 | 2312 | 1127 |
|                   |         | ePVCVL-OG15  | 11                  |  | + | 15895817 | 15897227 | 2708 | 4118 | 1411 |
|                   |         | ePVCVL-OG16  | 12                  |  | - | 13437088 | 13433323 | 1488 | 4597 | 3766 |
|                   |         | ePVCVL-OG17  | 12                  |  | + | 13437089 | 13437510 | 459  | 891  | 422  |
|                   |         | ePVCVL-OG18  | 12                  |  | + | 13437516 | 13438725 | 5418 | 6611 | 1210 |
|                   |         | ePVCVL-OG19  | Oglab12_unplaced047 |  | + | 58       | 4574     | 357  | 5062 | 4517 |
|                   | ePVCVL2 | ePVCVL2-OG1  | 4                   |  | - | 26260103 | 26253603 | 15   | 6558 | 6501 |
|                   |         | ePVCVL2-OG2  | 5                   |  | - | 15500612 | 15494086 | 64   | 6420 | 6527 |
|                   |         | ePVCVL2-OG3  | 7                   |  | + | 7758507  | 7764924  | 1    | 6524 | 6418 |
|                   |         | ePVCVL2-OG4  | 9                   |  | + | 16969612 | 16970506 | 279  | 1173 | 895  |
|                   |         | ePVCVL2-OG5  | 9                   |  | + | 16970503 | 16971982 | 4749 | 6229 | 1480 |
|                   |         | ePVCVL2-OG6  | 10                  |  | - | 8397098  | 8392335  | 1568 | 6154 | 4764 |
|                   |         | ePVCVL2-OG7  | 11                  |  | - | 6045997  | 6045480  | 6046 | 6558 | 518  |
|                   |         |              |                     |  |   | 6045479  | 6044654  | 1    | 1285 | 826  |
|                   |         | ePVCVL2-OG8  | 11                  |  | - | 6592706  | 6587472  | 1286 | 6558 | 5235 |
|                   |         | ePVCVL2-OG9  | 11                  |  | - | 9224687  | 9219391  | 1222 | 6435 | 5297 |
|                   |         | ePVCVL2-OG10 | 11                  |  | + | 15896886 | 15897190 | 2706 | 3010 | 305  |
|                   |         | ePVCVL2-OG11 | 11                  |  | - | 15899867 | 15899177 | 1518 | 2241 | 691  |
|                   |         | ePVCVL2-OG12 | Oglab02_unplaced013 |  | - | 19352    | 17967    | 5146 | 6521 | 1386 |
|                   |         | ePVCVL2-OG13 | Oglab02_unplaced013 |  | - | 22131    | 20365    | 1570 | 3370 | 1767 |
| O. glumaepatula   | ePVCVL  | ePVCVL-OU1   | 3                   |  | + | 4729510  | 4730670  | 5485 | 6650 | 1161 |
|                   |         | ePVCVL-OU2   | 4                   |  | - | 20425951 | 20425145 | 5296 | 6549 | 807  |
|                   |         | ePVCVL-OU3   | 4                   |  | + | 20426253 | 20428023 | 4843 | 6650 | 1771 |
|                   |         |              |                     |  |   | 20428024 | 20428093 | 1    | 66   | 70   |
|                   |         | ePVCVL-OU4   | 6                   |  | - | 25698260 | 25697867 | 250  | 643  | 394  |
|                   |         | ePVCVL-OU5   | 12                  |  | + | 21618343 | 21619520 | 3736 | 4914 | 1178 |
|                   |         | ePVCVL-OU6   | 12                  |  | + | 21626409 | 21626529 | 6530 | 6650 | 121  |
|                   | ePVCVL2 | ePVCVL2-OU1  | 1                   |  | - | 25261149 | 25260838 | 6238 | 6543 | 312  |
|                   |         | ePVCVL2-OU2  | 10                  |  | - | 15996112 | 15995870 | 5351 | 5593 | 243  |
|                   |         | ePVCVL2-OU3  | 11                  |  | - | 11666533 | 11665031 | 1222 | 2726 | 1503 |
| O. longistaminata | ePVCVL  | ePVCVL-OL1   | Scaffold122663      |  | - | 42442    | 42094    | 1164 | 1512 | 349  |
|                   |         | ePVCVL-OL2   | Scaffold136348      |  | - | 10166    | 8367     | 4140 | 6549 | 1800 |
|                   |         | ePVCVL-OL3   | Scaffold136348      |  | + | 10226    | 11234    | 5763 | 6650 | 1009 |
|                   |         |              |                     |  |   | 11235    | 11298    | 1    | 75   | 64   |
|                   | ePVCVL2 | ePVCVL2-OL1  | Scaffold126431      |  | + | 170647   | 170724   | 6452 | 6529 | 78   |
|                   |         | ePVCVL2-OL2  | Scaffold136293      |  | - | 6470     | 6407     | 6095 | 6162 | 64   |
| O. meridionalis   | ePVCVL  | ePVCVL-OM1   | 1                   |  | + | 843164   | 844272   | 5006 | 5785 | 1109 |
|                   |         | ePVCVL-OM2   | 1                   |  | - | 19176727 | 19176596 | 3867 | 3998 | 132  |
|                   |         | ePVCVL-OM3   | 2                   |  | + | 19424534 | 19424933 | 5150 | 5410 | 400  |
|                   |         | ePVCVL-OM4   | 3                   |  | + | 2366827  | 2368542  | 2080 | 3410 | 1716 |
|                   |         | ePVCVL-OM5   | 3                   |  | + | 2369641  | 2370890  | 3258 | 4414 | 1250 |
|                   |         | ePVCVL-OM6   | 8                   |  | + | 9592885  | 9593588  | 4729 | 5204 | 704  |
|                   |         | ePVCVL-OM7   | 8                   |  | - | 10030062 | 10029035 | 4510 | 5344 | 1028 |
|                   |         | ePVCVL-OM8   | 9                   |  | + | 3194279  | 3194422  | 6136 | 6279 | 144  |
|                   | ePVCVL2 | ePVCVL2-OM1  | 4                   |  | - | 23170204 | 23169068 | 4527 | 5663 | 1137 |
|                   |         | ePVCVL2-OM2  | 6                   |  | + | 11359819 | 11361254 | 2628 | 3552 | 1436 |
|                   |         | ePVCVL2-OM3  | 7                   |  | - | 18949381 | 18949008 | 4536 | 4909 | 374  |
|                   |         | ePVCVL2-OM4  | 8                   |  | - | 5997777  | 5996654  | 617  | 1740 | 1124 |
|                   |         | ePVCVL2-OM5  | 8                   |  | - | 5999649  | 5999224  | 5834 | 6138 | 426  |
|                   |         | ePVCVL2-OM6  | 8                   |  | + | 9583173  | 9583690  | 4196 | 4579 | 518  |
|                   |         | ePVCVL2-OM7  | 8                   |  | - | 10030167 | 10030053 | 4129 | 4243 | 115  |
|                   |         | ePVCVL2-OM8  | 9                   |  | - | 11799894 | 11798813 | 3530 | 4249 | 1082 |

|                    |         |              |    |   |          |          |      |      |      |
|--------------------|---------|--------------|----|---|----------|----------|------|------|------|
| <i>O. punctata</i> | ePVCVL  | ePVCVL2-OM9  | 11 | - | 7758285  | 7758179  | 1    | 108  | 107  |
|                    |         | ePVCVL2-OM10 | 11 | + | 7758637  | 7759163  | 2056 | 2447 | 527  |
|                    | ePVCVL  | ePVCVL-OP1   | 2  | - | 18174237 | 18173741 | 1002 | 1500 | 497  |
|                    |         | ePVCVL-OP2   | 2  | + | 18174238 | 18174792 | 1520 | 2085 | 555  |
|                    |         | ePVCVL-OP3   | 2  | + | 18174893 | 18175461 | 3969 | 4537 | 569  |
|                    |         | ePVCVL-OP4   | 2  | + | 18175564 | 18175698 | 1551 | 1685 | 135  |
|                    |         | ePVCVL-OP5   | 2  | + | 18175703 | 18178269 | 4053 | 6628 | 2567 |
|                    |         | ePVCVL-OP6   | 2  | - | 18178605 | 18178270 | 31   | 369  | 336  |
|                    |         | ePVCVL-OP7   | 2  | + | 18178606 | 18180215 | 357  | 1988 | 1610 |
|                    |         | ePVCVL-OP8   | 2  | + | 18180216 | 18182535 | 4359 | 6650 | 2320 |
|                    |         | ePVCVL-OP9   | 3  | - | 1877451  | 1870791  | 1    | 6629 | 6661 |
|                    |         | ePVCVL-OP10  | 3  | - | 1877899  | 1877452  | 6228 | 6650 | 448  |
|                    |         | ePVCVL-OP11  | 4  | - | 11094038 | 11089082 | 44   | 5005 | 4957 |
|                    |         | ePVCVL-OP12  | 7  | - | 14019246 | 14018987 | 3763 | 4022 | 260  |
|                    |         | ePVCVL-OP13  | 7  | + | 14019291 | 14021601 | 4347 | 6650 | 2311 |
|                    |         |              |    |   | 14021602 | 14021994 | 1    | 408  | 393  |
|                    |         | ePVCVL-OP14  | 7  | - | 14022570 | 14022140 | 3935 | 4365 | 431  |
|                    |         | ePVCVL-OP15  | 9  | + | 2488988  | 2494894  | 476  | 6650 | 5907 |
|                    |         | ePVCVL-OP16  | 9  | + | 2508244  | 2509198  | 5707 | 6650 | 955  |
|                    |         |              |    |   | 2509199  | 2509685  | 1    | 490  | 487  |
|                    |         | ePVCVL-OP17  | 9  | - | 2510214  | 2509778  | 6191 | 6646 | 437  |
|                    |         | ePVCVL-OP18  | 9  | - | 2511022  | 2510216  | 5703 | 6471 | 807  |
|                    |         | ePVCVL-OP19  | 9  | + | 2511023  | 2513219  | 1330 | 3521 | 2197 |
|                    |         | ePVCVL-OP20  | 9  | + | 2513220  | 2515543  | 4196 | 6514 | 2324 |
|                    |         | ePVCVL-OP21  | 12 | - | 17241666 | 17239641 | 4690 | 6629 | 2026 |
|                    |         | ePVCVL-OP22  | 12 | - | 17241795 | 17241667 | 1758 | 1891 | 129  |
|                    |         | ePVCVL-OP23  | 12 | - | 17242162 | 17241796 | 2142 | 2513 | 367  |
|                    | ePVCVL2 | ePVCVL2-OP1  | 1  | + | 36462406 | 36468381 | 497  | 6529 | 5976 |
|                    |         | ePVCVL2-OP2  | 7  | - | 14512232 | 14518685 | 56   | 6548 | 6454 |
|                    |         | ePVCVL2-OP3  | 12 | + | 17242165 | 17243967 | 1    | 1803 | 1803 |
|                    |         | ePVCVL2-OP4  | 12 | + | 17245498 | 17250240 | 1798 | 6539 | 4743 |
| <i>S. bicolor</i>  | ePVCVL  | ePVCVL-SB1   | 3  | - | 293657   | 286801   | 1    | 6879 | 6857 |
|                    |         | ePVCVL-SB2   | 3  | - | 18263770 | 18263397 | 4846 | 5222 | 374  |
|                    |         | ePVCVL-SB3   | 3  | - | 18270253 | 18267703 | 4321 | 6880 | 2551 |
|                    |         | ePVCVL-SB4   | 4  | + | 46230217 | 46237235 | 13   | 6890 | 7019 |
|                    |         | ePVCVL-SB5   | 5  | - | 12982623 | 12982416 | 6667 | 6890 | 208  |
|                    |         | ePVCVL-SB6   | 5  | + | 13007912 | 13013637 | 1152 | 6890 | 5726 |
|                    |         | ePVCVL-SB7   | 5  | + | 13013665 | 13020548 | 1    | 6872 | 6884 |
|                    |         | ePVCVL-SB8   | 5  | - | 13715088 | 13710895 | 1955 | 6179 | 4194 |
|                    |         | ePVCVL-SB9   | 5  | + | 33532220 | 33538691 | 196  | 6759 | 6472 |
|                    |         | ePVCVL-SB10  | 5  | + | 47930070 | 47936859 | 10   | 6796 | 6790 |
|                    |         | ePVCVL-SB11  | 5  | - | 58530701 | 58530474 | 5519 | 5751 | 228  |
|                    |         | ePVCVL-SB12  | 5  | + | 58530702 | 58531602 | 1    | 926  | 901  |
|                    |         | ePVCVL-SB13  | 5  | + | 58531603 | 58536533 | 1960 | 6890 | 4931 |
|                    |         | ePVCVL-SB14  | 5  | + | 58536624 | 58537273 | 1    | 674  | 650  |
|                    |         | ePVCVL-SB15  | 5  | - | 58541750 | 58537274 | 569  | 5057 | 4477 |
|                    |         | ePVCVL-SB16  | 6  | + | 31383876 | 31384127 | 6628 | 6890 | 252  |
|                    |         | ePVCVL-SB17  | 6  | + | 31384129 | 31388146 | 2887 | 6890 | 4018 |
|                    |         |              |    |   | 31388147 | 31391037 | 1    | 2965 | 2891 |
|                    |         | ePVCVL-SB18  | 6  | + | 37580566 | 37581109 | 6352 | 6890 | 544  |
|                    |         | ePVCVL-SB19  | 6  | + | 37581137 | 37587995 | 1    | 6890 | 6859 |
|                    |         |              |    |   | 37587996 | 37588062 | 1    | 68   | 67   |
|                    |         | ePVCVL-SB20  | 6  | - | 44430825 | 44423973 | 4    | 6890 | 6853 |
|                    |         | ePVCVL-SB21  | 7  | + | 36892423 | 36897609 | 1    | 5688 | 5187 |
|                    |         | ePVCVL-SB22  | 7  | - | 36898552 | 36897755 | 5324 | 6123 | 798  |

|                    |             |             |              |          |          |          |      |      |      |
|--------------------|-------------|-------------|--------------|----------|----------|----------|------|------|------|
|                    | ePVCVL-SB23 | 7           | -            | 36901720 | 36898553 | 2513     | 6140 | 3168 |      |
|                    | ePVCVL-SB24 | Super_19    | +            | 790000   | 792947   | 677      | 3641 | 2948 |      |
|                    | ePVCVL-SB25 | Super_19    | +            | 793795   | 795128   | 5082     | 6429 | 1334 |      |
|                    | ePVCVL-SB26 | Super_19    | +            | 795337   | 796253   | 4127     | 5041 | 917  |      |
|                    | ePVCVL-SB27 | Super_19    | +            | 796354   | 796769   | 6461     | 6890 | 416  |      |
|                    | ePVCVL-SB28 | Super_19    | +            | 796771   | 800729   | 2887     | 6867 | 3959 |      |
| ePVCVL2            | ePVCVL2-SB1 | 1           | +            | 54922322 | 54928778 | 1        | 6544 | 6457 |      |
|                    |             |             |              | 54928779 | 54928805 | 1        | 27   | 27   |      |
|                    | ePVCVL2-SB2 | 4           | +            | 16773368 | 16779949 | 1        | 6499 | 6582 |      |
|                    | ePVCVL2-SB3 | 6           | +            | 37559217 | 37562676 | 123      | 3583 | 3460 |      |
|                    | ePVCVL2-SB4 | 6           | -            | 37563756 | 37562692 | 5027     | 6029 | 1065 |      |
|                    | ePVCVL2-SB5 | 6           | -            | 37571348 | 37566378 | 22       | 5032 | 4971 |      |
|                    | ePVCVL2-SB6 | 10          | -            | 16463710 | 16457225 | 3        | 6544 | 6486 |      |
|                    |             |             |              | 16457224 | 16457110 | 1        | 115  | 115  |      |
|                    | ePVCVL2-SB7 | 10          | +            | 16463785 | 16463938 | 6198     | 6351 | 154  |      |
| <i>P. virgatum</i> | ePVCVL      | ePVCVL-PV1  | 3b           | -        | 5042450  | 5042142  | 1991 | 2322 | 309  |
|                    |             | ePVCVL-PV2  | 7a           | +        | 35051553 | 35051689 | 6487 | 6635 | 137  |
|                    |             |             |              |          | 35052031 | 35054066 | 1    | 2699 | 2036 |
|                    |             | ePVCVL-PV3  | 7a           | +        | 39593523 | 39594633 | 2684 | 3795 | 1111 |
|                    |             | ePVCVL-PV4  | 7a           | -        | 39595884 | 39595051 | 1146 | 1969 | 834  |
|                    |             | ePVCVL-PV5  | 7a           | -        | 39602918 | 39601951 | 1    | 1079 | 968  |
|                    |             | ePVCVL-PV6  | Contig04516  | -        | 10517    | 6085     | 2054 | 6651 | 4433 |
|                    |             | ePVCVL-PV7  | Contig171646 | -        | 646      | 389      | 1414 | 1675 | 258  |
|                    |             | ePVCVL-PV8  | Contig171646 | -        | 953      | 716      | 404  | 639  | 238  |
|                    |             | ePVCVL-PV9  | Contig171646 | -        | 1469     | 1173     | 333  | 618  | 297  |
|                    |             | ePVCVL-PV10 | Contig171646 | -        | 2090     | 1972     | 31   | 151  | 119  |
|                    | ePVCVL2     | ePVCVL2-PV1 | 7a           | -        | 40139014 | 40138744 | 3240 | 3510 | 271  |
|                    |             | ePVCVL2-PV2 | 7a           | +        | 40139022 | 40141657 | 3273 | 5903 | 2636 |
|                    |             | ePVCVL2-PV3 | 8b           | +        | 47417775 | 47417980 | 336  | 541  | 206  |

Each of the ePVCVL and ePVCVL2 segments was mapped to the respective virus genomes of ePVCVL and ePVCVL2 reconstructed from the *O. sativa (japonica)* genome, or to those constructed from the *S. bicolor* genome. Considering the assemble level of *O. longistaminata* genomic data we used, the segments shorter than 100 bp were also listed.
