# Supplementary material
Source: publisher figshare collection journal article supplement (https://plos.figshare.com/articles/dataset/_/5160220)
Supplement: Supplementary file 1 [file 1 › S4 Dataset.txt]

#for S2 Fig.
>eRTBVL-X
TGGTATCAGAGCCTGGTAATCATAGAGAAGCTAAATTCAGAAGCTA--ATATTGGAAAGGTAATTACTACTAAAGATAATTTGAATA-TAAGGTGTAGACTAAATCATATTGAAGACCATAGTTGGCACTCTAACAATAGTC----AATT-----AAATTTAATTGTTGATCTGATATATAATTTTTATATAAATTGGGATAAAAAGCAGGTAGATTTAGAGCAAAAGTTAGAAGATATATATAAAGAACAAAAG------CAATTTGTAGAACAATATTCTTTTC---TTAATAATAAGCTAAATACTACATTAGAATTATTAGAAGATTATAAGATAAGGCAAAATAAAATTTCACAGAATAGTGATTATATTAAAGAATTACTAGACAAAAT---CAACTCTAGTA-AAGGTAAGGAAATAGTTTTGGCTTCATCTGGCATAGTCTCGTCTTCACAAGCCATTAAT---TCTGAAAAATGGACA--TATCTAGGAGTCTCTTTAGAAGAATAGCAAGCAGAGAGATAATGTTGATAAACAAAAAGGTAAAAATGAAGACATAGATGAGCTTGAAGATATTGCAGAAGTAGACAAACAGCTCGAAAGATATCAACGAGATACTTTAAGGGCAATAAGACCTCAACAAATATATTGCATGGG--ATTTTTTGAGAATAAAAATGGGTTATAAGAATATCTAGAGAAGTAGAGTTAAGCGTTTTAACAAAGCCAGTTGAGTAAAAATTGTAGCCAAGGAATTT------GAAAATGGATTAAAGTATTCAGGG-----------TATAAATATATTCACCAAGGTATGTATATAATAGGAATCAAAGGTATGACAAGAAAGAAATTAGGAGCTAAAGTTCTAATAACTCTGTTAGATAAAAGGTGG--GACACAATAGAT--AAAGCAGCATTA---GGATTTTTAGAAGGTGACATGAATGA-GAATATGTTGA---TAACA--------------TATATAGCCC---CAGATCTAATGATGCCTATAAAAG----------AATTTATAGATAAAATGAGTTTTGGTTTTCA-----AACAAAGGGATACGAGAATTTAAAGGAAC----AAATTTGCTAGTAAG-CATAGAATTTATAG-----------GAAGATTAACTAATAGAAG-----------TGCCTCCAAATACAA-------AATAAATGT----------AAATGACGTGATTGAAAATATGCACTCTA---AGGGAATAACTTTCAT---GAGCCCTTAAAAATAAGT-TCTGAAGAAAGGGCAGGAGAA-----GAATGGAAAATTAG----------TG-------ATTTAATTGAAAGCAAAA--CTTTGAGTCAGCCTGAAAATTTATAAGTT----------------------ATCAAAAAG----------------TAAAGGAAA------------TACAGCATTAGATTTATAAATTA-------CAAAC---------------------CCAGAACCACAGATGACTTAGAAAC--AGAAGCATCTGATAGAAATATAAT------------------------AGATAATAGAAGACATAGTGTTTCAGAGTTTATGGAAAAATTAGATCAAGAAAGTGAGATAAAATATTACGAAAATAAATTAAAGGAAATAAATGAAGAATATAATAACTCTATGAAGTGTGAGTGGCCTAAAATAAGAGATAAAGAACTTTA------TTTCTATAGAGAATTAGCTAGAGTAAAGAAAGTAAA-----GAAGAAGAAGATATGGCAGT-------AAAATTTTTAAAAACCAAGAGCAAGATAAGCATGACAAAGAAGAGCAAAATCTTGGTAAAATTTTAAGTGAAGAAGAGCAATGGGCAGAGAATG-----AAAGATTATTTCTTGAAAGTTATGAAGAAGAAATTAATCTAATAAATGAGATGGAGAATATAGAAAATG--AAATAGACAATAC-------AGAACAATATAATGATTTTATAAACACATTAGATGAAGTAGGGTTACATAATCTTGAT---------AATGCAATGGAAGC------TATGGAAGTGGACTTAGGAACAGGAAA----GAGAAAAAGATATGGA-----------------------------------GAAGGTACTGTG---------------------AAAAACGAAGGAGAAAGAGAAAGACCAGCTAGGGCAGCA-------GGAAAATGGCC----------CCCTGATAGAGAAGAATTTTCATATAACTATATACCAGGTCAATATAGGCATATGGGTACAAAGA-------------GAAGAGACTTTGAGAAGCCTGTTA-----AATTTCAAAACCAGAGGAGTGATGGTGCTATATTAAATTTAGCCG--------------------------------CACATGACCCTATTGATTGGCCTAATATTATTAGTAT-----TTGGAAAGGTTTAATAGTTCAAAAATATATT------------------------CAAAACCAGCAC----------AATATAGGAAGTAAAGTTGAAGATATGATAACC---------------TACTTAGAAACATT------------CTTAGGTGAATCT-----GCTAAGATTCTATGGGAACAATGGGTTGAAAAGAA-------TCCTAATAATTATGAAGAATTGAAAAGAGCTGGTAGCAATCCGCATAATTTTGCAAATGTTATCTAAATTATA----------TAGCTGAAGATCCGGAATTAGGTTATACAACTTTGCAAAATGAAAGGTTAAAAGAAATAGAAAAATTAACGTTAACAAGTTGGA------AAGGCATAAAAGAATTCTCCCAACATTATT-TATATAATGCTACAACTGCTAACAAGGA----TAAAAGGGAATAGTTGACGTATTTAATAAACTACCTGACCCATTAGGTAGTATGATTTTTGAGGAA-----TATAAAAAGGAAACTGAAGGAGCTGAAATTAATATTTCCCAAGCCATAACCTTCGTGTTCAAACAATTAAGAAAAATATGCACAGGAATACAAGCCCAAAGGTCATGAAACATCGATTAAATTTTGCAATAAAATAGTTCAAATACCCTTGTCATATGGAGAAGACAAGCCTAGAAGTAAAAGGATTTATAAACATCAAAATAGAAACCATAATAATATTAGAACAAAGAAAA--GGTATTTCTTAAGAAGATCAGATAATAGAGCACCCTTCTTACATAAAAGAAATGTAAGAAGATATAATCCAAAGAAAACCTATGACAAAACATGCAGATGTTTTATATGCAACTCGCCAGAT---CATTTAAGTAGAACATGCCCAAATAAAGATCAAAAAGATATTCTAGTAAATATG-AAGAACAAGAGAGGTTTAA-----------------TTATAGA--TAGCGTAAATGAAAATATA------------TTAGTATGTGATGATGAAATAAAAGATGACGAGTCAATATATTCTATCATAGAAACAGACGAAGTTGA-----------AACCATCAACGAAGAATATGAATCATCCGATGAAGAGTTAGATTTAATTGACGAATTA---GCAG-GTTTAAAGGTTGAAATGATG--GATCAATTAAATTGTGAACATGATTGGATTAGAGGAAAGGGTGACTATAATAT---------------------CAAATGTGCT--------TTTTG----CATATATTATCCAAGTCAAGAAAATAGAGTGACTTGTAGTATATGTCTAAAACAAGCTTGTGCTGAATGTATAAAAGCAAATAAACAAAAATGGAGAAAAGAAATAGAATTAGAATCAGATGAAAAGACT-TTATCTAGTAGAGTACGAGTGTTAGAAAATAGACTAAATAAACTAGAAGTAGAATTAGAGAACCTAAAAAATAATTGCGATATTAAGGCACTACCAGAGAATAAGGACATACAAAACACCGAATTTAAAGAGCAATTGATAACATTAAAAGACAGTAATACTGTAA-AATAATTCAAC---TAAGAGATGCCATAACTAATTTTGGAAATAAATATATAGTAAGATTG------CCTTTCAAAGAAATATTAGGTA------------------TAAGAATCCCTGTTAAAATAAAATTGACACCCAAAGTATC---TTATAAAATATTAGCACTAGTAGACACTGGGTGTACAAAGAATATTATTCATGACAAATATTTCACAAGATGTCCTGAAATAGTTCACACAATTGACGACAATAAGGCAGAAGTTTCCACAGACATGTCCGGAATAAAGAAAATTCATAATCAGTTAGCTTATAATATGGAGGTTTACATTAATGCAACTAAATATATAATAGATGAGA--TTACAATAAGAGATTTGTCAATGATTAATGATGACATGA-TAATTGGCCTAAGGTTCCTTCAACAATCAGTACAAACCACAGTAATACATGAGCAAGGAATTACTTTTATCCCATATCAAAATATTTCCATATATCTCAGAGGTACGAAAGCGTGGTGGAACTCCCCCTCCCCAAAACCCGACAAACTCGACAACTTAGAAGTACCCAATCTGAGCTGAAGAAAGAA-----TTAATGAATATGAGCTTAGTAGAATATAGACAACTATTTTTCAAATTCCAATATAGAATGCATAGGACTACAATCATTTGCACCAAATTGGTATAGAGATATTAAGTCTAAAAGGGATATAGAAAAAATTATTCAAAGATTAGAAGATATCCAAATTATAGGAGAAATTCCTATGAAATATTGGGAGAAAAATGCTATTGAGTGTAAAATTAATATAATCAACCCA-GAATATA---TCATTAAGACTAGCCCAATAGAGGCAACTCCGAAAGACAT--AGAAGAATTTAA----AATGCATATAGAAGAACTGTTGAAACTAGGAGCCATAAGAGAGAGCAGAAGTCCACACAGGTCTGCAGCATTCATAGTAAGAAATCATGCAGAAGAAGTTAGAGGTAAATCTAGGATGG--------------TCATAAATTATAAA-----AGACTAAATGATAATACTATAGAAGATGCCTATA-------ATATTCCAAATAAGCAAGAATGGATTAATAGAATA----------------CAAGGTAGTAAATATTTCTCAAAATTTGACTTGAAAGCTGGA----TTCTGGCAA---ATAAAGATGGCAGAAGAATCTATAGAATGGACTGCATTTACATGTCCTCAAGGACATTATGA--ATGGCTTGTTATGCCATTAGGATTAAAAAATGCACCAGCAATTTTCCAAAGGAAAATGCAGAATATATTTAACGAAAACCAAGAATTCATATTAGTCACATAGATGACCTGTTAGTCTTCTCAAGGACTTACAAAGAACATATTGC----TCATCTTGAAATATTTTTTAGAAAGGTGGAACAAAATGGGTTAATATTATCCAAA--AAGAAAATGGAAATATGCAAAGAAAAAATTAATTTCCTTGGACATGAAATAGGAGAGGGCAAAATTCATTTGCAAGAACATATTGCTAAGAAAATTTTAGAATTTCCTGATGCTATGAATGATAAAAAGAAATTACAGCAATTCTTAGGGCTTGTAAATTATGCTAGAAATCACATCAATAATTTAGCAAAGTT--AGCAGGAC--------CGTTATATGCTAAA---TTAAGAAAAAATGGTCAGAGATAT---TTTAATTCTGAAGACATCAAATTAGTAAGATTAATAAAAGAGAGGGTGAAAGAATTAAAACCTCTAGAATTACCATTAGAAGAGAGTTACTTTATTATTGAAACTGATGCATCGCAGCTTGGTTGGGGTGCTGTATTAAAACAA-----AGGCCTACTAAATATTCAT-----CTAAGTCAGAAGAAAAAGTTTGTAGGTATGCTTCTGGAAGCTATAAATTAAAAACCGTAGGCAATACAGATAGAGAAATACTTGCAATAATCAATGCGATAAATGCCTTTAGGTTATATTTAGGTTCAAAGAATTTACGGTTAGAACAGAT-TGCGAAGCTATATGTAGATATTATAATCAGCTTAATAGCAAGAAGAGTTCCACTAGGAGGTGGATTTTATTTGAAGATATCATTACTGGCAACGGATATAAAGTTATATTTGAACATATTAAGGGAAAAGATAATCATTTACCTGATCTACTCTCGCGAT-----CGCCTATTTTGCAGGAATGAAGAAGTCCATGAATTATAATGGAATTGAGTTCTTCACGTTTGGAGAAGACAATAAGCTCAAAGTATTCCCACCGAATACCTATAAGTTTAAGCCAAAAACCCACATAAATTAGATGAAGTCCAAGAATGC-ATTTTAGATAATTTCTGGTATCAATACAATAATAAGAGGGAAGAAAAAGGCTATATGCTATCAATATTAAACAGTCTTGCTGAATATTTCCATCTAATGAATGATATAATGCCAACATCAGAAAATAATGAAGTGAT-ACCGCAAAAACCCATATATGTTGTTTTTGACGGAAAGCTTCCTGGAGTGTACATATCTTTTGAAGAGATAGTAGCCCAAAAAATAGATGCAAAATTAATGGGTGGATTGTCATGGAAAAAATATATAGATTTTGATGAAGCTTTAACTCAGGCTAGAAAAATATTAGGAATAAATTATTATCTAGAGCCTGCTGCAAAAGAATATATTCAAAAATGCAAAAAAGCTAAAGGAAAGAAGACTTCAGAAATACCCATTAAGATGACTATAAAAGAAGAAGGGTTTTTTAAAAAACCCACATACAAGGAATGCTTAACAAAAGGAGTGGATCCATTAGATGGGGAATATATTGATTGGAAGATAATAGAAAAATTTGAAGAAGCCTCCCCACAGTTAAAGAAGGAATTGAAGGAAGAAATACTTA-AAGAATTAAAACAAGAAATGGATCAGAAATTTG----AGCAAATAAAAAAGGCAAT---AGATGAGAAATTAGAAGTTTCTTTTCTGATTTGGACACA-ATGGATCTTGGTGGCCATGGGCAACCAGATGAATAAATTAATATAAGCTAAATATGTTTTTCAATATATATTGATAATAGAATATCAATAATTTGGGCGTGGAAGAAGAATAAACGAAGATTTCAGAAGACTACTCAAGAAGGAATCCAGAAGAAGGAATCCAGAAGGACACCCTATAAAGCATAAAGGAACAATATAGGGTGCGGTGAATGACATATCCCTGTGAAGAATAAAACTTTCGGTGGAAAGGCCCCGGCTTTAGCTAGCTCTCGTGAATCCACAGTAGCGAAGAGATAAGCAGGAGACACAGGCGACGCCATCCCTGGCCTCTATAAAAGGAGACGTTGGCCTTCACTCCGAGGAGACACAACAACAAGAACAAGAATAACACAACAATAACAACAACAACGAAGACACCATTCAGAGCAAAGCTTTCAAGCGCGCTCTCACCCTCCATTCCAC-CGTTCTTAGTAGTAGTGACTTTAGCCTACCTTGCATAGTATATTGAAGCAAG---GAGTGTGTAATAACGCTGTGTAAG-------GTAAGAAC--------------------AGCTTGCTTGTACCTA--CCTTCGGGT--TTCCCGAAAGGGAAAACCGTATGTAAGCTTATCTGTTTAATATGAAGTAAT-------TTTCCTTAAGTATTCCTGCACGTTTGTTCTAGA---CAAGTGTTTATGCTAAGGACCCTATAGGAGAAACCTCTTCGGTTTGTTCTCGTTTTTAGCCTGCATCTGCATAGGCGTCTGGAGAACGGTATCCGTAGAGAAGTGTTCCCTTCGGGTGGAACTGCCTGGGGAGACGATAAACTCTTAGCTAGAACAAGTGTGACTTGGAATATCTTTTAAGTTGCTTCTAAAAAGAAGATAGGTGAGGCATACGGTAGTACCGAGTAGGACTTTAATCATCGAAACAAGCTTCTGAGGCTGTCTAAATAGGATTCGCCACCCTGCAAAGATCCTAAAGTTAAAATATCTCTCGAAGTGAACAGTATGAACAGTAATTTAACAGTAAATGAATAGTATCAGCCGAATAAAAGTAAACTGAATAGTATTCAGCCGAATAAATAGTGTT
>eRTBVL2
TGGTATCAGAGCC-AGTCATCATAGAGAAATCAAATTCAGAAGCTA--ATATTGGAAAGGTAATTACTACCAAAGATAATTTGAATA-TAAGGTGTAGACTAAATCATATTGAAGACCATAGTTGGCACTCTAACAATAGTC----AATT-----AAATTTAATTGTTGATCTGATATATAATTTTTATATAAATTGGGATAAAAAGCAGGAAGATTTAGAGCAAAAGTTAGAAGATATATATAAAGAACAAAAG------CAATTTGTAGAACAATATTCTTTTC---TTAATAATAAGCTAAATACTACATTAGAATTATTAGAAGATTATAAGATAAGGCAAAATAAAATTTCACAGAATAGTGATTATATTAAAGAATTACTAGACAAAAT---CAACTCTAGTA-AAGGTAAGGAAATAGTTTTGGCTTCAACAGGCATAATTACCTCGTCTCAAGCTATTAAT---TCAGAAAAATGGACC--TATCTAGGAGTTTGTTTAGAAGAATAGCAAGCAGAGAGATAATGTTGATAAACAAAAAGGTAAAAATGAAGACATAGATGAGCTTGAAGATATTGCAGAAGTAGACAAACAGCTCGAAAGATATCAACGAGATACTTTAAGGGCAATAAGACCTCAACAAATATATTGCATGGG--ATTTTTTGAGAATAAAAATGGGTTATAAGAATATCTAGAGAAGTAGAGTTAAGCGTTTTAACAAAGCCAGTTGAGTAAAAATTGTAGCCAAGGAATTT------GAAAATGGATTAAAGTATTCAGGG-----------TATAAATATATTCACCAAGGTATGTATATAATAGGAATCAAAGGTATGACAAGAAAGAAATTAGGAGCTAAAGTTCTAATAACTCTGTTAGATAAAAGGTGG--GACACAATAGAT--AAAGCAGCATTA---GGATTTTTAGAAGGTGACATGAATGA-GAATATGTTGA---TAACA--------------TATATAGCCC---CAGATCTAATGATGCCTATAAAAG----------AATTTATAGATAAAATGAGTTTTGGTTTTCA-----AACAAAGGGATACGAGAATTTAAAGGAAC----AAATTTGCTAGTAAG-CATAGAATTTATAG-----------GAAGATTAACTAATAGAAG-----------TGCCTCCAAATACAA-------AATAAATGT----------AAATGACGTGATTGAAAATATGCACTCTA---AGGGAATAACTTTCAT---GAGCCCTTAAAAATAAGT-TCTGAAGAAAGGGCAGGAGAA-----GAATGGAAAATTAG----------TG-------ATTTAATTGAAAGCAAAA--CTTTGAGTCAGCCTGAAAATTTATAAGTT----------------------ATCAAAAAG----------------TAAAGGAAA------------TACAGCATTAGATTTATAAATTA-------CAAAC---------------------CCAGAACCACAGATGACTTAGAAAC--AGAAGCATCTGATAGAAATATAAT------------------------AGATAATAGAAGACATAGTGTTTCAGAGTTTATGGAAAAATTAGATCAAGAAAGTGAGATAAAATATTACGAAAATAAATTAAAGGAAATAAATGAAGAATATAATAACTCTATGAAGTGTGAGTGGCCTAAAATAAGAGATAAAGAACTTTA------TTTCTATAGAGAATTAGCTAGAGTAAAGAAAGTAAA-----GAAGAAGAAGATATGGCAGT-------AAAATTTTTAAAAACCAAGAGCAAGATAAGCATGACAAAGAAGAGCAAAATCTTGGTAAAATTTTAAGTGAAGAAGAGCAATGGGCAGAGAATG-----AAAGATTATTTCTTGAAAGTTATGAAGAAGAAATTAATCTAATAAATGAGATGGAGAATATAGAAAATG--AAATAGACAATAC-------AGAACAATATAATGATTTTATAAACACATTAGATGAAGTAGGGTTACATAATCTTGAT---------AATGCAATGGAAGC------TATGGAAGTGGACTTAGGAACAGGAAA----GAGAAAAAGATATGGA-----------------------------------GAAGGTACTGTG---------------------AAAAACGAAGGAGAAAGAGAAAGACCAGCTAGGGCAGCA-------GGAAAATGGCC----------CCCTGATAGAGAAGAATTTTCATATAACTATATACCAGGTCAATATAGGCATATGGGTACAAAGA-------------GAAGAGACTTTGAGAAGCCTGTTA-----AATTTCAAAACCAGAGGAGTGATGGTGCTATATTAAATTTAGCCG--------------------------------CACATGACCCTATTGATTGGCCTAATATTATTAGTAT-----TTGGAAAGGTTTAATAGTTCAAAAATATATT------------------------CAAAACCAGCAC----------AATATAGGAAGTAAAGTTGAAGATATGATAACC---------------TACTTAGAAACATT------------CTTAGGTGAATCT-----GCTAAGATTCTATGGGAACAATGGGTTGAAAAGAA-------TCCTAATAATTATGAAGAATTGAAAAGAGCTGGTAGCAATCCGCATAATTTTGCAAATGTTATCTAAATTATA----------TAGCTGAAGATCCGGAATTAGGTTATACAACTTTGCAAAATGAAAGGTTAAAAGAAATAGAAAAATTAACGTTAACAAGTTGGA------AAGGCATAAAAGAATTCTCCCAACATTATT-TATATAATGCTACAACTGCTAACAAGGA----TAAAAGGGAATAGTTGACGTATTTAATAAACTACCTGACCCATTAGGTAGTATGATTTTTGAGGAA-----TATAAAAAGGAAACTGAAGGAGCTGAAATTAATATTTCCCAAGCCATAACCTTCGTGTTCAAACAATTAAGAAAAATATGCACAGGAATACAAGCCCAAAGGTCATGAAACATCGATTAAATTTTGCAATAAAATAGTTCAAATACCCTTGTCATATGGAGAAGACAAGCCTAGAAGTAAAAGGATTTATAAACATCAAAATAGAAACCATAATAATATTAGAACAAAGAAAA--GGTATTTCTTAAGAAGATCAGATAATAGAGCACCCTTCTTACATAAAAGAAATGTAAGAAGATATAATCCAAAGAAAACCTATGACAAAACATGCAGATGTTTTATATGCAACTCGCCAGAT---CATTTAAGTAGAACATGCCCAAATAAAGATCAAAAAGATATTCTAGTAAATATG-AAGAACAAGAGAGGTTTAA-----------------TTATAGA--TAGCGTAAATGAAAATATA------------TTAGTATGTGATGATGAAATAAAAGATGACGAGTCAATATATTCTATCATAGAAACAGACGAAGTTGA-----------AACCATCAACGAAGAATATGAATCATCCGATGAAGAGTTAGATTTAATTGACGAATTA---GCAG-GTTTAAAGGTTGAAATGATG--GATCAATTAAATTGTGAACATGATTGGATTAGAGGAAAGGGTGACTATAATAT---------------------CAAATGTGCT--------TTTTG----CATATATTATCCAAGTCAAGAAAATAGAGTGACTTGTAGTATATGTCTAAAACAAGCTTGTGCTGAATGTATAAAAGCAAATAAACAAAAATGGAGAAAAGAAATAGAATTAGAATCAGATGAAAAGACT-TTATCTAGTAGAGTACGAGTGTTAGAAAATAGACTAAATAAACTAGAAGTAGAATTAGAGAACCTAAAAAATAATTGCGATATTAAGGCACTACCAGAGAATAAGGACATACAAAACACCGAATTTAAAGAGCAATTGATAACATTAAAAGACAGTAATACTGTAA-AATAATTCAAC---TAAGAGATGCCATAACTAATTTTGGAAATAAATATATAGTAAGATTG------CCTTTCAAAGAAATATTAGGTA------------------TAAGAATCCCTGTTAAAATAAAATTGACACCCAAAGTATC---TTATAAAATATTAGCACTAGTAGACACTGGGTGTACAAAGAATATTATTCATGACAAATATTTCACAAGATGTCCTGAAATAGTTCACACAATTGACGACAATAAGGCAGAAGTTTCCACAGACATGTCCGGAATAAAGAAAATTCATAATCAGTTAGCTTATAATATGGAGGTTTACATTAATGCAACTAAATATATAATAGATGAGA--TTACAATAAGAGATTTGTCAATGATTAATGATGACATGA-TAATTGGCCTAAGGTTCCTTCAACAATCAGTACAAACCACAGTAATACATGAGCAAGGAATTACTTTTATCCCATATCAAAATATTTCCATATATCTCAGAGGTACGAAAGCGTGGTGGAACTCCCCCTCCCCAAAACCCGACAAACTCGACAACTTAGAAGTACCCAATCTGAGCTGAAGAAAGAA-----TTAATGAATATGAGCTTAGTAGAATATAGACAACTATTTTTCATCATATCTTCCAAAATCTATAGAATTGCCA----------------GGTA---AGACATCATG-------GGAAGATAGA------TATTT----ATTAAAAGCTACTAAAGATTTTGAAT-------------ATATATGCAGGGAAATG-------GCTTCACAGAAGTCTGAATGGCTCACAAATATGAGTTCATGGAGACTGCCCCAACTG-------CCCAGAGGCCATGGAGAACGATTTAATCACAAT---TTCAGAATAAC-----------AGAGCTACAACAAGGGTTATTAAACCTC------TTGTGGCA-----AACAAAAAACAAAAAAGAAAAAGCT-----CATGCCTTAAATGGCTTGGCATATTATTTCAAAAATTTCGTGCCCTCAGATCAAAAGATAA---CAGAAAAAAGGGCTAAAATGCAAGATATCCCTCATCATGAAGAAAGG-TTACTAGATTATCGCGAGGAGAAATCCCGTGATGGCCAAGAT------AAACTTCTCATGGAAGTCGAACAATCTATGGCAACAGATAAGAATACCAAGGTATTCT------CAGATAAGATTTTGATCTCAGCAGATCCGCTTCGAGCATGGTTGCTTTCCACATAAATATCAATAAC--CTATTGCAATCTTTCCCA--------CATAAT-----------AAACCA-------TCATCATCCACA-AAAAGGCATGATATCATTCCCCAA-----ACACCATACATACTGCATAATCATCCTAATTTATTCCTT-----------CCACAAT------ATATACTCCGGACTCAGCCAAAAGCACCATGTAGA--------------TCTTGTGCCTACA------------AAGATTC---------------TTGCAAAAAGAAACTTAAAA-GCCAAAATCCCATGAGTACTACA-------TACGAAAATCTCCAA----CCCAGATTAAGCTTCAAAACGGAACAA-ACTTTATCCTGCTTTGGGCAAGACATCCTCGATCTTGTTTGGCAAAAGTTTAAGGAGAGACAAATGAAAATATTCCTTGGACTCCAAGATTATTTCTTTGAT----CTCTTAGAAGGGAGA--GAAAGAAACCCAGCCATACGAGTAATCAT------------------------------ATATATGCTCCCTCTCTTAAGACTAGATAATCAGGCAATTTCTGACCCTCCTATAGATTCCTGGTTCTCAAAGCTGAGATAAATCTTCAAAGA-----TTCCGGAACCTACCCACATACAACC-------------ATGAAGAAATATCT-------------CTCCAAACCATTATAGATCAT-----GGTCTTGTGAATTC----------CATATATGCAACCCTCGAT-CAGATCCTTCAATCTGATT--------------------TAGGAAATG-----CTGTGAAAGATGTC--TGCAGGAGAC----------------TTGGACATG-GAAGATACAGGATTATCTTCTCCTCAA--TACCACCAAAATTCACACACCTGTTC-------GTCCAGCAATTCATTATATAT------------------ATATCATGAAGGGACAAT----------------------------------------------------TTAATT--------TTCAAGAAGACGGTCTTAGCAAACTATCGG-------------ATGAAGAGGAAGAAA-----TATATACAACAGTTGCTAATCATGAAAATTGGAGATTATTTTCTGA----------------AGCTGCAGAAATTGAAGAAGCTATCACCACA--------------------------------------GATTATGAATATC--------AGCTGGTTTTCCAAAA--------CAAGAT--------------------------CACAAGGATTTTTATCA------------------GCAAATTCTACAACCAAA--GTTAT------------------GAATAC-TTCAAGGGAGC-AGGGCGCATAATTAAACCGGATTTTGGAAAT---------GAATGCTCC-----AAGAAAAGTTACTACAGAAACCTG------------GCTC---------AGTGGTTTC--------------------------AGAAAACAGA---------------------GCCATCAGAGATTGACACGGTACAATCAGCACCAATGATAATCAACGAAGATAATGAATAAAGATTTTGTCATCCCCGACAAAGATCACTATTCAAGATAAGGAATCTACACTTTC----------CAGATAAGTATGGATCTTGGTGGTCATGGGCAACCAGATGAATAGAATTCTTTAAGCTAAATATGTTTTTCAATATATATTGATAATAGAATATCAATAATTTGGGCGTGGAAGAAGAATAAACGAAGATTTCAGAAGACTACTCAAGAAGGAATCCAGAAGAAGGAATCCAGAAGGACACCCTATAAAGCATAAAGGAACAATATAGGGTGCGGTGAATGACATATCCCTGTGAAGAATAAAACTTTCGGTGGAAAGGCCCCGGCTTTAGCTAGCTCTCGTGAATCCACAGTAGCGAAGAGATAAGCAGGAGACACAGGCGACGCCATCCCTGGCCTCTATAAAAGGAGACGTTGGCCTTCACTCCGAGGAGACACAACAACAAGAACAAGAATAACACAACAATAACAACAACAACGAAGACACCATTCAGAGCAAAGCTTTCAAGCGCGCTCTCACCCTCCATTCCAC-CGTTCTTAGTAGTAGTGACTTTAGCCTACCTTGCATAGTATATTGAAGCAAG---GAGTGTGTAATAACGCTGTGTAAG-------GTAAGAAC--------------------AGCTTGCTTGTACCTA--CCTTCGGGT--TTCCCGAAAGGGAAAACCGTATGTAAGCTTATCTGTTTAATATGAAGTAAT-------TTTCCTTAAGTATTCCTGCACGTTTGTTCTAGA---CAAGTGTTTATGCTAAGGACCCTATAGGAGAAACCTCTTCGGTTTGTTCTCGTTTTTAGCCTGCATCTGCATAGGCGTCTGGAGAACGGTATCCGTAGAGAAGTGTTCCCTTCGGGTGGAACTGCCTGGGGAGACGATAAACTCTTAGCTAGAACAAGTGTGACTTGGAATATCTTTTAAGTTGCTTCTAAAAAGAAGATAGGTGAGGCATACGGTAGTACCGAGTAGGACTTTAATCATCGAAGCAAGCTTCTGAGGCTGTCTAAATAGGATTCGCCACCCTGCAAAGATCCTAAAGTTAAAATATCTCTCGAAGTGAACAGTA-GAACAGTAATTTAACAGTAAATGAATAGTATCAGCCGAATAAAAGTAAACTGAATAGTA-TCAGCCGAATAAATAGTTTT
>ePVCVL_oryza_group
TGGTATCAGAGCCAAGTGCTCGTA--------ACCTCCCCAAGCCATCTTCTCCGAAAGGGGGGG------GAAGAGGGGTCGGGTAGCGTGCTGAAGTCGCGGTGATCCCGAACGGTGTGG-TGGTGTTCTGA----AGTCGCGGAGTTCCCGAACCTTTGATCGGTTGCCTGAAGTCGCGTTGCCTTGTTGAGCCGCAGAAGGCGTTTGTCGGCGTAATTCGTTGACT---GGGCACTTATCAAAGGCAAAGGTTGAACTTAATTGTGGGA-AATATTCCCTGCCGTTGACTGGAACACATCATATCCAAATAGGTTGATCATA--ATTGTGGG-------------AGATTTCCC-------CGCCGTTGTCTGGTAACTACCTACCTATCTTCCTATCTTTCGTATAAGAT---------GTCTTGGT-----------TGGTTAGATCACGAAGAGCCACTGATCGATCTGTAGCCTCGTGCAGTAGCGAGAAGTCTGTT-------------------GGCACTATGTCGGTAAA--------GAATGCTTCATCTATATCT---TTTGAGGATATTG-------AGA-----------AAAGATTTCAACGAAGATTCCTAAGGTTAATA----TTAAGGAAATATATCATGTAGGTACTTTTTCGTTACTTA------GTGACTACTATATTAAAACAATTGAAA--AAACTATTCCAATTAGTTCTTTGCATGAAA-------CCCTGCATCTTCTTTCAGAAAGAGAAATCAATTCTAAAGAGCTAAACATCAATATCACTACCTTCACTTTGGTCT-TATACAAGTTGCTTCAGATCCTTGACTAGAAAGGGTTTGAACGTCTCTGTTCTGGC-------TTGTCTAAGAGATTGCAGAAATAAAAGGTTCAAAGATTCCTTACTTGGCATGGTGGAAGCCAGCCTCAGTAATGGTCCTGTTTATTTTAACACCTTTCCTGATTTTTCTGTATCCCTCTCAGACACAA--ATATCCATAAAGTTCTCACTCTCAACTTACAAACA--------TCTGGTTATGAACTAGAACCAGGGAGTGAAAACATCTCCGTTACCTACAGAGTTTACTACAAAGCCATGACAACTTTAGCACCTTGTGCCAAACATTAAC-ACCAAAAGGCCTAACCACTCTCCTTCAAAC-CAATCCTAATAACAGATGTACTACCCCCAAAACCCTGAAATGGGATGAGATCACCCTGCCTGAGAAATGGGTTTTATCTCAAGCTGTTGAACCTAAGTCTATGGATCAACGGAAGTCGAATCCTTGATTGAAACACCAGACGGAGATGTTGAGATAACATTTGCTTCAAAACAAAAAGCCTTTCTCCAGTCTAGACCTTTGTCAGTCTAGATTCAGGCCTAGGACAAAACTCAAAATGTTGTCTATGCTACCTATGAAGACAACTCCGACGAACCTTCAATCTCAGACTTCGATATCAATGTTATCGAGCTTGATGTTGGCTTTGTTATTGCCATAGAAGAAGATGAGTTTGAAATTGATAAAGATTTGCTTAAAAAAGAACTCAGGCTTCAAAAGAACCGACCCAAGAT----GAAAAGATACTTTGAAAGGGTCGATGAACCATTTAGACTAAAGATAAGAG---AACTTTGGCACAAAGAAATGAGAG--AACAAAGGAAGAACAT-----CTTTTT---CTTTGATTGGTAGAAAGTAGCCAAGTCAACACTTCGAAGAATTCTTCAAAGGAAAAAACATGATGAAAAAAGAGCAAAAATCCGAAGCAGAAGATTTAACTGTTATCAAGAAGGTTTCTACAGAATGGG----AGACAACCAGTGGAAACAAGGT--AGACTCTGTTCATCCTCCATTTGAATCCATTCAATTATCTCATAATGGAGGAAAAGCTTGTCCACTAAAAAGTATT-------------TCTAAAAATACATATGGAGAA-ACAGCAAAGGTTGAACACATAGGACATTTGGTAGAACAACAAAATTA---TGCAAATATATC------------TCTACGTTCTCTTGGTCAACAAACAGATCGAATAGAGACAATCCTTATGGAA---GGCTACAAAACAGGAAGACCTGAGGTAAAGATAAATATTCCCTCTAATTCTCAGTCTTCTAGTTCTCAGTCTGTTAGTCCTATGTTTGTCCCAACAATTGATCCTAACATCAAACTTGGAAAACAAAAGGCTTTTGGACCCGCAATTTCTGAAGAACTAGTCAGTGAGCTAGCCTTAAAACTAAATAATTTAAAAGTAAATAAAAAT---ATCAATG-AGATTTCTGATAATGAAAAATATGATATGGTCAACAAGATTTT--TAAACCTTCTACTCTTACTTCCACAACT--AGGAATTATTACCCTCGACCAACTTATGCAGACCTACAGTTTGAGGAAATGCCTCAGATTCAAAATATGACTTACTACAATGGCAAAGAAATTGTAGAATGGAACTTAGATGGCTTTACTGAATATAATCTTTATTTATTCATCAAATGATTATGTATGCTAATGCCTGCATAGCTAATGGAAACAAAGAAAGAGAAGCTGCCAATATGATTGTCATTGGGTTTTCTGGTCAATTAAAAGGATGGTGGAATAATTATTTAAATGAAACTCAAAGACAGGGATTCT-TTCGATTAAAAGGGAGACAGGAAGGCCATTGCCCGATAGAGATGGTAATGGGAATCCAACCGGTAACATTTCTGATGCCTTAGCCACTTTAATCTATAACATAATTTATCACTTTGCCGGAAACT----ATCATGATAT----CTATGAA-----AAAAATAGAGAGCAATTGATAATTTAAAAGTAAAAATGTAGATTTTAGATGGTATAAAGATACTTTCTTGTCAAAACTATATACCCTACCAGAAC--CTAATCAAGACTTTTGGAAAGAAA-----AATATATTT-CTGGTTTACCTCCTTTATTTGCTGAAAAGGTT----AGAAATTCCCTAAGAAAAGAAGGGGGAGGGAGTATAAATTA------------TCACTATCTAGATATTGGAAAAATCACACAAAAGATACA-ATTAGTAGGGGC----------------------TGAGCTTTGCAATGA-------------------------------------CCTAAAAATCAAAG-----------ATCAACTCAAAAAACAAAGGATTCTTGGTAAAAGAGAAATGGGAGATTTTTGCTATCAGTTGGTTTTCAAGATCCTTATGTCTATAGAAA------AAGAAAACCCATTC------AAACCTATGACAAAAC---CAAATG------ATAAAA---GCAAGATGAGCTTTCAAGCTA-------CCAAAAGAAAACCAAAAAGAATTTACAATAAGAATATAAGAACACAAGACACTGAAAGCAAAGAAACCATTTGTTACAAATGTGGCTTGAAAGGACACATAGCTAACAGATGTTTCAAATCCAAAGTTAAAAAAGAGATCCAAGCCTTGTTAGATTC------AGAATCAGAAGATGTTAAAGAAAAACTTGAAGCAATACTAAATAATATA--------GACAATGACTCAAGTTCAGATGAAGAAAAAAATGCAGAGATTAATTGTTGCCAAGACAGTGGTTGCTCTTGTTATGAGCCAGATAATTCAGAAGAAGAGTCTGATGAAAATATACTCGTTTTAACCAGTTTAGAAGAATTTGTTCTCGATACTTTTGAAACCATTCAAGATCCAGAAGAAAAAAGAAGAGT---------------TCTCGAAAAATTCCTTTC---AAGAGTCAAGACTGATAAGGATAAACTAAAAAAGGATAT----------TCAAAAGAGCAAATTCCTCTCTATTGATG---AAGTGTTCAAA---AGATTAGATGAAC-AGAAAAAGAAGAATGGAAACC-AGATTTGATCAGCCTATT----------CGAAGACCAAAAAATTATGAAACA--AGATTTAGAAGAAATAAGAAAGCGTCTATACATGTTAGAATTAAAAGAAGGATTCCATATGGAAGAAAAGGACGAACCAATTCAAGAAG-------ATGATCAGGTTGTTGGAACCATTCAAAAATATATGAAGCAAAAATGGTACACAGAAGTTATGTATCGTTTTATAGACGGATCCTACTTTCAGCATATCACTTTAATTGATTCTGGTGCTGATGTCAATTGCATTCGAGAAG-GTATTATCCCTCATAAATATTTC---------TGTAAAGCCGCCCACAGAATTCGTGGGGCAGATGGAGGACTTTTAACAGTAGAATATCAAATCCCTGAAATCTATATTTGCATATCT---------GAAGTTTGCATTAAAACATCT---TTTCTACTCGTTAAAAATCTTAAGCAAGATGTTATTTTAGGAACACCGTTTTTATCACTCATTCGTCT----TCCTTGTCACAAACGAAGATATTCAATTTGAGATATGGGCAAACAGGTG------------AGCCTAAGATTTTCGTCTAACACAGA--------------------------------------TGAGATTCTTGACAGTT-----------GTTCAGACCAAAAGAGAACAAGTTGTGAATCAATAT------------ATTTACATGACAATTTTCCATCATATCTTCCAAAATCTATGGACTTGCCA----------------GGTA---AGACATCATG-------GGAAGATAGA------TATTT----ATTAAAAGCTACTAAAAATTTTGAAT-------------ATATATGCAGGGAAATG-------GCTTCACAGAAGTCTGAATGGTTCACGAATATGAGTTCATGGAGACTGCCCCAACTG-------CCCAGAGGCCATGGAGAACGATTTAATCACAAT---TTCAGAGTAAC-----------AGAGCTACAACAAGGGTTATTAAACCTC------TTGTGGCA-----GACAAAAAACAAAAAAGAAAAAGCT-----CATGCCTTAAATGGCCTGGCATATTATTTCAAAAATTTCGTGCCCTCAGATCAAAAGATAA---CAGAAAAAAGGGCTAAACTACAAGATATCCCTCATCATGAGGAGAGG-TTACTAGATTATCGCGAGGAGAAATCCCGTGATGGCCAAGAT------AAACTTCCCATGGAAGTTGAACAATCTATGGCAACAGATAAGAATACCAAGGTATTCT------CAGATAAGATTTTGATCTCAACAGATCCGCTTCGAGCATGGTTGCTTTCCACATAAATATCAATAAC--CTATTGCAATCTTTTCCA--------CATAAT-----------AAACCA-------TCATCATCCACA-AAAAGGCATGATACCATTCCCCAA-----ACACCATACATACTGCATAATCATCCCAATTCATTCCTT-----------CCACAAT------ATATACTCCGGACCCAGCCAAAAGCACCATGTAGA--------------TCTTGTGCCTACA------------AAGATTC---------------TTGCCAAAAGAAACTTAAAA-GCCAAAATCCCATGAGTACTACA-------TACGAAAATCTCCAA----CCTAGATTAAGCTTCAAGACGGAGCAA-ACTTTATCCTGCTTTGGGCAAGACATCCTCGATCTTGTTTGGCAAAAGTTTAAGGAGAGACAAATGAAAATATTCCTTGGACTCCAAGATTATTTCTTTGAT----CTCTTAGAAGGAAGA--GAAAGAAACCCAGCCATACGAGTAATCAT------------------------------ATATATGCTCCCTCTCTTAAGGCTAGATGATCAGGCAATCTCTGACCCTCCTATAGATTCCTGGTTCTCAAAGCTGAGATAAATCTCCAAAGA-----TTCCGGAACCTACCCACATACAACC-------------ATGAAGAAATATCT-------------CTCCAAACCATTATAGATCAT-----GGTCTTGTGAATTC----------CATCTATGCAACCCTCGAT-CAGATCCTTCAATCTGATT--------------------TAGGAAGCG-----CTGTGAAAGATGTC--TGCAGGAGAC----------------TTGGACATG-GAAGATACAGGATTATCTTCTCCTCCA--TACCACCAAAATTCACACACCTGTTC-------GTCCAGCAATTCATTATATAT------------------ATATCATGAATGGACAAT----------------------------------------------------TTAATT--------TTCAAGAAGACGGTCCTAGCAAACTATCGG-------------ATGAAGAGGAAGAAA-----TATATACAACAATTGCTAATCATGAAAATTGGAGATTATTTTCTGA----------------AGCTGCAGAAATTGAAGAAGCTATCACCACA--------------------------------------GATTATGAATATC--------AGCTGGTTTTCCAAAA--------CAAGAT--------------------------CACAAGGATTTTTATCA------------------GCAAATATTACAACCAAA--GTTAT------------------GAATAC-TTCAAGGGAGC-AGGGCGCATAATTAAACCGGATTTTGGAAAT---------GAATGCTCC-----AAGAAAAGTTACTACAGAAGCCTG------------GCTC---------AGTGGTTTC--------------------------AGAAAACAGA---------------------GCCGTCAGAGATCGACACGGTGCAATCAGCACCCATGATAATCAACGAAGATAATGAATAAAGATCTTGTCATCCCCGACAAAGATCACTATTCAAGATAAGGAATCTACACTTTC----------CAGATAAG-ATAAGTCT--------ATAGTCAAAAGG-------------------------------------------CGATATTATGACATCTTTATT-------------------------AAAGGTCAAAAGCGTCATCACCAAAGATTCT-----------------------CTCCATGAAGTCTAAAGGGATATCATG------------------AACTCTTTGAAGTCAAGAA----------------------------GAGATATCATGAAGATTCTCTACCG-AGCGCTATATAAGGGGCTCA-------CCATCACATTTC---------AGAGGCATCGCATTTCAC---------ACACAAC----------------ACATCTCACTCA----------------ACCATTCCTCTCAC--CTCTCCACCA-GCCATCACACTCCACTCCACTCCATCTAAGTGTTAGT-ACTATAGTATAACCTAAATAAAAGACTCATGAGAGTCTAAGTGTGAGAG---TCTATGTAAGAGTCCTTGTGAGAGTCCTGTACCTGTATAATTACGAACGTG-TTGTACCAAGTCCTTGGTGTAATCTTCAGAAGGATCTACC----TTCAACCTATCAAGGT-ATATGAATGAACACCTGGACCGTTCTATATAAACCTAC---TATGTTCTAAATTCTAATTTTATATCTTG-------TACATAATTCGTATTTACAGCTTGTCTTTATTT----CCTGTA-CTGCATTTATGTTTGCATAATAATA----TAAAAAAAAATT------------AACAACCTGGATTGCCATCCAATTGTCACAT---ACTAATCTCACATCCAAGATT--------------------GCATATAGATACTGCAT--------------------TCCTATCCTCATA-------TCTGG---TGACTAGACCCTAGTCACTGCCCTG------------GGTT--------------------------GAGC----------------------------------------------------------------------------

#for S7 Fig. (eRTBVL2 related to eRTBVL-A1)
>chr08:11236546-11243393R
TGGTATCAGAGCC-AGTCATCATAGAGAAATCAAATTCAGAAGCTAATATTGGAAAGGTAATTACTACCAAAGATAATTTGAATATAAGGTGTAGGCTTAATCACATTGAAGACCATAGTTGGCACTCTAACAATAGTCAATTAAATTTAATTGTTGATCTGATATATAATTTTTATATAAATTGGGATAAAAAGCAGGAAGATTTAGAGCAAAGGATTGAAGATTTGTTTAAAGAACGAAAGCAATCTGAAGAACTATATTTGCTTGTCAGTAATAAATTAAATTCAGTGCTAAAAGAGCTAGAGGAATATAAGACAAGGCAGAATAAAATATTACAAAACAGTGACTATATCAAAGAGTTATTAGAAATAATAAATTCTAGTAAAGGAAAAGAGATAGTTTTGGCTTCAACAGGCATAATTACCTCGTCTCAAGCTATTAATTCAGAAAAATGGACCTATCTAGGAGTTTGTTTAGAAGAATAGCAAGCAGAGACGATAAATGTATTGTTAAACAAAAAGGTAAAAATGAAGACATAGATGAGCTTGAAGATATTGCAGAAGTAGACAAACAGCTCGAAAGATATCAAAGAGATACTTTGAGGGCAATAAGACCTCAACAAATATATTGCATGGGATTTTTTGAGAATAAAAATGGGTTATACAGAATATCTAGAGAAGTAGAGTTAAGCGTTTTAACAAAGCCAGTTGAGTTAAAAATTGTAGCCAAGGAATTTGAAAATGGATTAAAGTATTCAGGGTATAAATATATTCACCAAGGTATGTATATAATAGGAATCAAAGGTATGACAAGAAAGAAATTAGGAGCTAAAGTTCTAATAACTCTGTTAGATAAAAGGTGGGACACAATAGATAAAGCAGCATTAGGATTTTTAGAAGGAGACATGAATGAGAATATGTTGATAACATATATAGCCCCAGATCTAATGATGCCTATAAAAGAATTTATAGATAAAATGAGTTTTGGTTTTCAAACAAAGGGATACGAAGAATTTAAAGGAACAAATTTGCTAGTAAGCATAGAATTTATAGGAAGATTAACTAATAGAAGTGCCTCCAAATACAAAATAAATGTAAATGACGTGATTGAAAATATGCACTCTAAGGGAATAACTTTCATGAGCCCTCTAAAAATAAGTTCTGAAGAAAGGGCAGGAGAAGAATGGAAAATTAGTGATTTAATTGAAAGCAAAACTTTGAGTCAGCCTGAAAATTTTATAAGTTATCAAAACAGTAAAGGAAATACAAGCATTAGATTTATAAATTACAAACCCAGAACCACAGATGACTTAGAAACAGAAGCATCTGATAGAAATATAATAGATAATAGAAGACATAGTGTTTCAGAGTTTATGGAAAAATTAGATCAAGAAAGTGAGATAAAATATTACGAAAATAAATTAAAGGAAATAAATGAAGAATATAATAACTCTATGAAGTGTGAGTGGCCTAAAATAAGAGATAAAGAACTTTATTTCTATAGAGAATTAGCTAGAGTAAAGAAAGTAAAGAAGAACGAAGATATGGCAGTAGAAATTTTTAAAAACCAAG---------------------AGCAAGATAAGCATGACAAAGAAGAGCAAAATCTTGGTAAAATTTTAAGTGAAGAAGAGCAATGGGCAGAGAATGAAAGATTATTTCTTGAAAGTTATGAAGAAGAAATTAATCTAATAAATGAGATGGAGAATATAGAAAATGAAATAGACAATACAGAACAATATAATGA-TTTATAAACACATTAGATGAAGTAGGGTTACATAATCTTGATAATGCAATGGAAGCTATGGAAGTGGACTTAGGAACAGGAAAGAGAAAAAGATATGGAGAAGGTACTGTGAAAAACGAAGGAGAAAGAGAAAGACCAGCTAGGGCAGCAGGAAAATGGCCCCCTGATAGAGAAGAATTTTCATATAACTATATACCAGGTCAATATAGGCATATGGGTACAAAGAGAAGAGACTTTGAGAAGCCTGTTAAATTTCAAAACCAGAGGAGTGATGGTGCTATATTAAATTTAGCCGCACATGACCCTATTGATTGGCCTAATATTATTAGTATTTGGAAAGGTTTAATAGTTCAAAAATATATTCAAAACCGGCACAATATAGGAAGTAAAGTTGAAGATATGATAACCTACTTAGAAACATTCTTAGGTGAATCTGCTAAGATTCTATGGGAACAATGGGTTGAAAAGAATCCTAATAATTATGAAGAATTGAAAAGAGCTGGTAGCAATCCGCATAATTTTGCAAATGTTATATCTAACATTATTATAGCTGAAGATCCGGAATTAGGTTATACAACTTTGCAAAATGAAAGGTTAAAAGAAATAGAAAAATTAACGTTAACAAGTTGGAAAGGCATAAAAGAATTCTCCCAACATTATTTATATAATGCTACAACTGCTAAGCAAGGATACAATAAGGGAATAGTTGAGCGATATTTTAATAAACTACCTGACCCATTAGGTAGTATGATTTTTGAGGAATATAAAAAGGAAACTGAAGGAGCTGAAATTAATATTTCCCAAGCCATAACCTTCGTGTTCAAACAATTAAGAAAAATATGCACAGGAATACAAGCCCAAAGGTCTATGAAACACTCGGATTACAATTTCTGCAATAAAATAGTTCAAATACCCTTGTCATATGGAGAAGACAAGCCTAGAAGTAAAAGGATTTATAAACATCAAAATAGAAACCATAATAATATTAGAACAAAGAAAAGGTATTTCTTAAGAAGATCAGATAATAGAGCACCCTTCTTACATAAAAGAAATGTAAGAAGATATAATCCAAAGAAAACCTATGACAAAACATGCAGATGTTTTATATGCAACTCGCCAGATCATTTAAGTAGAACATGCCCAAATAAAGATCAAAAGAGATATTCTAGTAAATATGAAGAACAAGAGAGGGTTCTAATTATAGATAGCGTAAATGAAAATATATTAGTATGTGATGATGAAATAAAAGATGACGAGTCAATATATTCTATCATAGAAACAGACGAAGTTGAAACCATCAACGAAGAATATGAATCATCCGATGAAGAGTTAGATTTAATTGACGAATTAGCAGGTTTAAAGGTTGAAATGATGGATCAATTAAATTGTGAACATGATTGGATTAAAGGAAAGGGTGACTATAATATCAAATGTGCTTTTTGCATATATTATCCAAGTCAAGAAAATAGAGTGACTTGTAGTATATGTCTAAAACAAGCTTGTGCTGAATGTATAAAAGCAAATAAACAAAAATGGAGAAAAGAAATAGAATTAGAATCAGATGAAAAGACTTTATCTAGTAGAGTACGAGTGTTAGAAAATAGACTAAATAAACTAGAAGTAGAATTAGAGAACCTAAAAAATAATTGCGATATTAAGGCACTACCAGAGAATAAGGACATACAAAACACCGAATTTAAAGAGCAATTGATAACATTAAAAGACAGTAATACTGCTAAAATAATTCAACTAAGAGATGCCATAACTAATTTTGGAAATAAATATATAGTAAGATTGCCTTTCAAAGAAATATTAGGTATAAGAATCCCTGTTAAAATAAAATTGACACCCAAAGTATCTTATAAAATATTAGCACTAGTAGACACTGGGTGTACAAAGAATATTATTCATGACAAATATTTCACAAGATGTCCTGAAATAGTTCACACAATTGACGACAATAAGGCAGAAGTTTCCACAGACATGTCCGGAATAAAGAAAATTCATAATCAGTTAGCTTATAATATGGAGGTTTACATTAATGCAACTAAATATATAATAGATGAGATTACAATAAGAGATTTGTCAATGATTAATGATGACATGATAATTGGCCTAAGGTTCCTTCAACAATCAGTACAAACCACAGTAATACATGAGCAAGGAATTACTTTTATCCCATATCAAAATACTGTTCCATATATCTCAGAGGTACGAAAGCGTGGTGGAACCTCCCCCTCCCCAAAACCCGACAAACTCGACAACTTAGAAGTACCCAATCTTGAGTCTGAAGAAAGAATTAATGAATATGAGCTTAGTGAGAATATAGACAACTATTCTTTCTCATCATATCTTCCAAAATCTATAGAATTGCCAG--------------------------------------------------------------------------------------------------GTAAGACATCATGGGAAGATAGATAT-------------------------------------------------TTATTAAAAGCTACT-------------AAAGATTTTGAATATATATGCAG-----------------------------------------------------------------------------GGAAATGGCTTCACAGAAGTCTGAATGGCTCACAAAT----------------ATGAGTTCATGGAGACTGCCCCAACTGCCCA--------------GAGGCCATGGAGAACGATTTAATCACAATTTCAGAATAACAGAGCTACAACAAGGGTTATTAAATCTTTTGTGGCAAACAAAAAACAAAAAAGAAAAAGCTCATGCCT----------------TAAATGGCTTGGCATATTATT----TCAAAAATTTCGTGCCCTCAGATCAAAAGATAACAGAAAAAAGGGCTAAAATGCAAGATATCCCTCATCATGAAGAAAGGT---TACTAGATTATCGCGAGGA---------------GAAATCCCGTGATGGCCA------------AGATAAACTTCTCATGGAAGTCGAACAA------TCTATGGCAACAGATAAGAATACCAAGGTATTCTCAGATAAGATTTTGATCTCAGCAGAT---CCTGCTTCGAGCATGGTTGCTTTCCACATAAATATCAATAACCTATTGCAATCTTTCCCACATAATAAACCATCATCATCCACAAAAAGGCATGATATCATTCCCCAAACACCATACAT----------ACTGCATAATCATCCTAATTTATTCCTTCCACAATATATACTCCGGACTCAGCCAAAAGCACCATGTAGATCTTGTGCCTACA--------------AAGATTCTTGCAAAAAGAAACTTAAAAGCCAAAATCCCATGAGT--ACTACATACGAAAATCTCCAACCCAGATTAAGCTTCAAAACGGAACAAACTT----TATCCTGCTTTGGGCAAGACATCCTCGATCTTGTTTGGCAAAAGTTTAAGGAGAGACAAATGAAAATATTCCTTGGACTCCAAGATT-----------------------------------------------------ATTTCTTTGATCTTTTAGAAGGG---------------------------------------------------------------AGAGAAAGAAACCCAGCCATACGAGTAATCATATATATGCTCCCTCTCTTAAGACTAGATAATCAGGCAATTTCTGACCCATCCTATAGA----------------------------------TTCCTGGTTCTCAAAGCTGAGATAAATCTTCAAAGATTCCGGAACCTA----CCCACATACAACCATGA----------AGAAATATCTCTCCAAACCATTATAGATCATGGTCTTGTGAATTCCATATATGCAACCCTCGATCAGATCCTTCAATCTGATTTAGGAAATGCTGTGAAAGATGTCTGCAGGAGACTTGGACATGGAAGATACA-------------------------GGATTATCTTCTCC-----------TCAATACCACCAA--AATTCACACCACCTGTTCGTCCAGCAATTCATTATATATATA--TCATGAAGGGACAAT--------------TTAATTTTCAAGAAGACGGTCTTAGCAAACT-------------ATCGGATGAAGA----GGAAGAAATATATACAACAGTTGCTAATCATGAAA---------------ATTGG----AGATTATTTTCTGAAGC--------------------------TGCAGAAA--TTGAAGAAGCTATCACCACAGATTATGAATATCAGCTGGTTTTCCAAAACAAGATCACAAGGATTTTTATCAGCAAATTCTACAACCAAAGTTATGAATACTTCAAGGGAGCAGGGCGCATAATTAAACCGGATT-------TTGGAAATGAATGCTCCAAGAAAAGTTACTACAGAAACCTGGCTCAGTGGTTTCAGAAAACAGAGCCATCAGAGATTGACACGGTACAATCAGCACCAATGATAATCAACGAAGATAATGAATAAAGATTTTGTCATCCCCGACAAAGATCACGATTCAAGATAAGGAATCTATA----CTATTCCAGAT-----AAGTATGGATCTTGGTGGCCATGGGCAACCAGATGAATAAATTAATATAAGCTAAATATGTTTTTCAATATATATTGATAATAGAATATCAATAATTTGGGCGTGGAAGAAGAATAAACGAATTTCAGAAGACTACTCAAGAAGGAATCCAGAAGAAGGAATCCAGAAGGACACCCTATAAAGCATAAAGGAACAATATAGGGTGCGGTGAATGACATATCCCTGTGAAGAATAA
>chr08:11155205-11157994R
-------------------------------------------------------------------------------------------------------------------------------------------------------------------------------------------------------------------------------------------------------------------------------------------------------------------------------------------------------------------------------------------------------------------------------------------------------------------------------------------------------------------------------------------------------------------------------------------------------------------------------------------------------------------------------------------------------------------------------------------------------------------------------------------------------------------------------------------------------------------------------------------------------------------------------------------------------------------------------------------------------------------------------------------------------------------------------------------------------------------------------------------------------------------------------------------------------------------------------------------------------------------------------------------------------------------------------------------------------------------------------------------------------------------------------------------------------------------------------------------------------------------------------------------------------------------------------------------------------------------------------------------------------------------------------------------------------------------------------------------------------------------------------------------------------------------------------------------------------------------------------------------------------------------------------------------------------------------------------------------------------------------------------------------------------------------------------------------------------------------------------------------------------------------------------------------------------------------------------------------------------------------------------------------------------------------------------------------------------------------------------------------------------------------------------------------------------------------------------------------------------------------------------------------------------------------------------------------------------------------------------------------------------------------------------------------------------------------------------------------------------------------------------------------------------------------------------------------------------------------------------------------------------------------------------------------------------------------------------------------------------------------------------------------------------------------------------------------------------------------------------------------------------------------------------------------------------------------------------------------------------------------------------------------------------------------------------------------------------------------------------------------------------------------------------------------------------------------------------------------------------------------------------------------------------------------------------------------------------------------------------------------------------------------------------------------------------------------------------------------------------------------------------------------------------------------------------------------------------------------------------------------------------------------------------------------------------------------------------------------------------------------------------------------------------------------------------------------------------------------------------------------------------------------------------------------------------------------------------------------------------------------------------------------AAAAGCTATGGAATTGCCAG--------------------------------------------------------------------------------------------------GTAAGACATCATGGGAAGATAGATAT-------------------------------------------------TTATTAAAAGCTACT-------------AAAGATTTTGAATATATATGCAG-----------------------------------------------------------------------------GGAAATGGCTTCACAGAAGTCTGAATGGCTCACAAAT----------------ATGAGTTCATGGAGACTGCCCCAACTGCCCA--------------GAGGCCATGGAGAACGATTTAATCACAATTTCAGAATAACAGAGCTACAACAAGGGTTATTAAACCTCTTGTGGCAAACAAAAAACAAAAAAGAAAAAGCTCATGCCT----------------TAAATGGCTTGGCATATTATT----TCAAAAATTTCGTGCCCTCAGATCAAAAGATAACAGAAAAAAGGGCTAAAATACAAGATATCCCTCATCATGAGGACAGGT---TACTAGATTATCGCGAGGA---------------GAAATCCCGTGATGGCCA------------AGATAAACTTCCCATGGAAGTTGAACAA------TCTATGGCAACAGATAAGAATACCAAGGTATTCTCAGATAAGATTTTGATCTCAGCAGAT---CCTGCTTCGAGCATGGTTGCTTTCCACATAAATATCAATAACCTATTGCAATCTTTTCCACATAATAAACCATCATCATCCACAAAAAGGCATGATACCATTCCCCAAACACCATACAT----------ACTGCATAATCATCCTAATTTATTCCTTCCACAATATATACTCCGGACCCAGCCAAAAGCACCATGTAGATCTTGTGCCTACA--------------AAGATTCTTGCAAAAAGAAACTTAAAAGCCAAAATCCCATGAGT--ACTACATACGAAAATCTCCAACCCAGATTAAGCTTCAAAACGGAACAAACTT----TATCCTGCTTTGGGCAAGACATCCTCGATCTTGTTTGGCAAAAGTTTAAGGAGAGACAAATGAAAATATTCCTTGGACTCCAAGATT-----------------------------------------------------ATTTCTTTGATCTCTTAGAAGGG---------------------------------------------------------------AGAGAAAGAAACCCAGCCATACGAGTAATCATATATATGCTCCCTCTCTTAAGACTAGATGAACAGGCAATTTCTGACCCATCCTATAGA----------------------------------TTCCTGGTTCTCAAAGCTGAGATAAATCTTCAAAGATTCCGGAACCTA----CCCACATACAACCATGA----------AGAAATATCTCTCCAAACCATTATAGATCATGGTCTTGTGAATTCCATATATGCAACCCTCGATCAGATCCTTCAATCTGATTTAGGAAACGCTGTGGAAGATGTCTGCAGGAGACTTGGACATGGAAGATACA-------------------------GGATTATCTTCTCC-----------TCAATACCACCAA--AATTCACACCACCTGTTCGTCCAGCAATTCATTATATATATA--TCATGAAGGGACAAT--------------TTAATTTTCAAGAAGACGGTCTTAGCAAACT-------------ATCGGATGAAGA----GGAAGAAATATATACAACAGTTGCTAATCATGAAA---------------ATTGG----AGATTATTTTCTGAAGC--------------------------TGCAGAAA--TTGAAGAAGCTATCACCACAGATTATGAATATCAGCTGGTTTTCCAAAACAAGATCACAAGGATTTTTATCAGCAAATTCTACAACCCAAGTTATGAATACTTCAAGGGAGCAGGGCGCATAATTAAACCGGATT-------TTGGAAATGAATGCTCCAAGAAAAGTTACTACAGAAACCTGGCTCAGTGGTTTCAGAAAACAGAGCCATCAGAGATTGACACGGTACAATCAGCACCAATGATAATCAACGAAGATAATGAATAAAGATTTTGTCATCCCCGACAAAGATCACTATTCAAGATAAGGAATCTACA----CTATT-CAGAT-----AAGTATGGATCTTGGTGGTCATGGGCAGCCAGATGAATAGAATTCTTTAAGCTAAATATGTTTTTCAATATATATTGATAATAGAATATCAATAATTTGGGCGTGGAAGAAGAATAAACGAATTTCAGAAGACTACTCAAGAAGGAATACAGAAGAAGGAATCCAGAAGGACACCCTATAAAGCATAAAGGAACAATATAGGGTGCGGTGAATGACATATCCCTGTGAAGAATAA
>chr08:11198926-11200223F
----------------------------------------------------------------------------------------------------------------------------------------------------------------------------------------------------------------------------------------------------------------------------------------------------------------------------------------------------------------------------------------------------------------------------------------------------------------------------------------------------------------------------------------------------------------------------------------------------------------------------------------------------------------------------------------------------------------------------------------------------------------------------------------------------------------------------------------------------------------------------------------------------------------------------------------------------------------------------------------------------------------------------------------------------------------------------------------------------------------------------------------------------------------------------------------------------------------------------------------------------------------------------------------------------------------------------------------------------------------------------------------------------------------------------------------------------------------------------------------------------------------------------------------------------------------------------------------------------------------------------------------------------------------------------------------------------------------------------------------------------------------------------------------------------------------------------------------------------------------------------------------------------------------------------------------------------------------------------------------------------------------------------------------------------------------------------------------------------------------------------------------------------------------------------------------------------------------------------------------------------------------------------------------------------------------------------------------------------------------------------------------------------------------------------------------------------------------------------------------------------------------------------------------------------------------------------------------------------------------------------------------------------------------------------------------------------------------------------------------------------------------------------------------------------------------------------------------------------------------------------------------------------------------------------------------------------------------------------------------------------------------------------------------------------------------------------------------------------------------------------------------------------------------------------------------------------------------------------------------------------------------------------------------------------------------------------------------------------------------------------------------------------------------------------------------------------------------------------------------------------------------------------------------------------------------------------------------------------------------------------------------------------------------------------------------------------------------------------------------------------------------------------------------------------------------------------------------------------------------------------------------------------------------------------------------------------------------------------------------------------------------------------------------------------------------------------------------------------------------------------------------------------------------------------------------------------------------------------------------------------------------------------------------------------------------------------------------------------------------------------------------------------------------------------------------------------------------------------------------------------------------------------------------------------------------------------------------------------------------------------------------------------------------------------------------------------------------------------------------------------------------------------------------------------------------------------------------------------------------------------------------------------------------------------------------------------------------------------------------------------------------------------------------------------------------------------------------------------------------------------------------------------------------------------------------------------------------------------------------------------------------------------------------------------------------------------------------------------------------------------------------------------------------------------------------------------------------------------------------------------------------------------------------------------------------------------------------------------------------------------------------------------------------------------------------------------------------------------------------------------------------------------------------------------------------------------------------------------------------------------------------------------------------------------------------------------------------------------------------------------------------------------------------------------------------------------------------------------------------------------------------------------------------------------------------------------------------------------------------------------------------------------------------------------------------------------------------------------------------------------------------------------------------------------------------AATAAGATCACAAGGATTTTTATCAGCAAATTCTACAACCAAAGCTATGAATACTTCAAGGGAGCAGGGCGCATAATTAAACCGGATT-------TTGGAAATGAATGCTCCAAGAAAAGTTACTACAGAAGCCTGGCTCAGTGGTTTCAGAAAACAGAGCCATCAGAGATTGACACGGTACAATCAGCACCAATGATAATCAACGAAGATAATGAATAAAGATTTTGTCATCCCCGACAAAGATCACAATTCAAGATAAGGAATCTATA----CTATTCCAGAT-----AAGTATGGATCTTGGTGGCCATGGGCAGCCAGATGAATAGAATTCTTTAAGCTAAATATGTTTTTCAATATATATTGATAATAGAATATCAATAATTTGGGCGTGGAAGAAGAATAAACGAATTTCAAAACACTACTCAAGAAAGGTTATCCAAGAAAGAATCCAGAAGGACACCCTATAAAGTATAAGGGGACAATATAGGATGCGGTGAATGACATATCCCTGTGAAGAATAA
>chr08:11211872-11214728F
----------------------------------------------------------------------------------------------------------------------------------------------------------------------------------------------------------------------------------------------------------------------------------------------------------------------------------------------------------------------------------------------------------------------------------------------------------------------------------------------------------------------------------------------------------------------------------------------------------------------------------------------------------------------------------------------------------------------------------------------------------------------------------------------------------------------------------------------------------------------------------------------------------------------------------------------------------------------------------------------------------------------------------------------------------------------------------------------------------------------------------------------------------------------------------------------------------------------------------------------------------------------------------------------------------------------------------------------------------------------------------------------------------------------------------------------------------------------------------------------------------------------------------------------------------------------------------------------------------------------------------------------------------------------------------------------------------------------------------------------------------------------------------------------------------------------------------------------------------------------------------------------------------------------------------------------------------------------------------------------------------------------------------------------------------------------------------------------------------------------------------------------------------------------------------------------------------------------------------------------------------------------------------------------------------------------------------------------------------------------------------------------------------------------------------------------------------------------------------------------------------------------------------------------------------------------------------------------------------------------------------------------------------------------------------------------------------------------------------------------------------------------------------------------------------------------------------------------------------------------------------------------------------------------------------------------------------------------------------------------------------------------------------------------------------------------------------------------------------------------------------------------------------------------------------------------------------------------------------------------------------------------------------------------------------------------------------------------------------------------------------------------------------------------------------------------------------------------------------------------------------------------------------------------------------------------------------------------------------------------------------------------------------------------------------------------------------------------------------------------------------------------------------------------------------------------------------------------------------------------------------------------------------------------------------------------------------------------------------------------------------------------------------------------------------------------------------------------------------------------------------------------------------------------CCCAAAACCCGACAAACTCGACAACTTAGAAGTACCCAATCTTGAGTCTGAAGAAAGAATTAATGAATATGAGCTTAGTGAGAATATAGACAACTATTCTTTCTCATCATATCTTCCAAAATCTATAGAATTGCCAG--------------------------------------------------------------------------------------------------GTAAGACATCATGGGAAGATAGATAT-------------------------------------------------TTATTAAAAGCTACT-------------AAAGATTTTGAATATATATGCAG-----------------------------------------------------------------------------GGAAATGGCTTCACAGAAGTCTGAATGGCTCACAAAT----------------ATGAGTTCATGGAGACTGCCCCAACTGCCCA--------------GAGGCCATGGAGAACGATTTAATCACAATTTCAGAATAACAGAGCTACAACAAGGGTTATTAAATCTTTTGTGGCAAACAAAAAACAAAAAAGAAAAAGCTCATGCCT----------------TAAATAGCTTGGCATATTATT----TCAAAAATTTCGTGCCCTCAGATCAAAAGATAACAGAAAAAAGGGCTAAAATGCAAGATATCCCTCATCATGGAGAAAGGT---TACTAGATTATCGCGAGGA---------------GAAATCCCGTGATGGCCA------------AGATAAACTTCTCATGGAAGTCGAACAA------TCTATGGCAACAGATAAGAATACCAAGGTATTCTCAGATAAGATTTTGATCTCAGCAGAT---CCTGCTTCGAGCATGGTTGCTTTCCACATAAATATCAATAACCTATTGCAATCTTTCCCACATAATAAACCATCATCATCCACAAAAAGGCATGATATCATTCCCCAAACACCATACAT----------ACTGCATAATCATCCTAATTTATTCCTTCCACAATATATACTCCGGACTCAGCCAAAAGCACCATGTAGATCTTGTGCCTACA--------------AAGATTCTTGCAAAAAGAAACTTAAAAGCCAAAATCCCATGAGT--ACTACATACGAAAATCTCCAACCCAGATTAAGCTTCAAAACGGAACAAACTT----TATCCTGCTTTGGGCAAGACATCCTCGATCTTGTTTGGCAAAAGTTTAAGGAGAGACAAATGAAAATATTCCTTGGACTCCAAGATT-----------------------------------------------------ATTTCTTTGATCTTTTAGAAGGG---------------------------------------------------------------AGAGAAAGAAACCCAGCCATACGAGTAATCATATATATGCTCCCTCTCTTAAGACTAGATAATCAGGCAATTTCTGACCCATCCTATAGA----------------------------------TTCCTGGTTCTCAAAGCTGAGATAAATCTTCAAAGATTCCGGAACCTA----CCCACATACAACCATGA----------AGAAATATCTCTCCAAACCATTATAGATCATGGTCTTGTGAATTCCATATATGCAACCCTCGATCAGATCCTTCAATCTGATTTAGGAAATGCTGTGAAAGATGTCTGCAGGAGACTTGGACATGGAAGATACA-------------------------GGATTATCTTCTCC-----------TCAATACCACCAA--AATTCACACCACCTGTTCGTCCAGCAATTCATTATATATATA--TCATGAAGGGACAAT--------------TTAATTTTCAAGAAGACGGTCTTAGCAAACT-------------ATCGGATGAAGA----GGAAGAAATATATACAACAGTTGCTAATCATGAAA---------------ATTGG----AGATTATTTTCTGAAGC--------------------------TGCAGAAA--TTGAAGAAGCTATCACCACAGATTATGAATATCAGCTGGTTTTCCAAAACAAGATCACAAGGATTTTTATCAGCAAATTCTACAACCAAAGTTATGAATACTTCAAGGGAGCAGGGCGCATAATTAAACCGGATT-------TTGGAAATGAATGCTCCAAGAAAAGTTACTACAGAAACCTGGCTCAGTGGTTTCAGAAAACAGAGCCATCAGAGATTGACACGGTACAATCAGCACCAATGATAATCAACGAAGATAATGAATAAAGATTTTGTCATCCCCGACAAAGATCACTATTCAAGATAAGGAATCTACA----CTATT-CAGAT-----AAGTATGGATCTTGGTGGCCATGGGCAACCAGATGAATAAATTAATATAAGCTAAATATGTTTTTCAATATATATTGATAATAGAATATCAATAATTTGGGCGTGGAAGAAGAATAAACGAATTTCAGAAGACTACTCAAGAAGGAATCCAGAAGAAGGAATCCAGAAGGACACCCTATAAAGCATAAAGGAACAATATAGGGTGCGGTGAATGACATATCCATGTGAAGAATAA
>chr08:11180477-11186865F
------------------------------------------------------------------------------------------------------------------------------------------------------------------------------------------------------------------------------------------------------------------------------------------------------------------------------------------------------------------------------------------------------------------------------------------------------------------------------------------------------------------------GTTCTGATAAACAAAAAGGTAAAAATGAAGACATAGATGAGCTTGAAGATATTGCAGAAGTAGACAAACAGCTCGAAAGATATCAACGAGATACTTTAAGGGCAATAAGACCTCAACAAATATATTGCATGGGATTTTTTGAGAATAAAAATGGGTTATACAGAATATCTAGAGAAGTAGAGTTAAGCGTTTTAACAAAGCCAGTTGAGTTAAAAATTGTAGCCAAGGAATTTGAAAATGGATTAAAGTATTCAGGGTATAAATATATTCACCAAGGTATGTATATAATAGGAATCAAAGGTATGACAAGAAAGAAATTAGGAGCTAAAGTTCTAATAACTCTGTTAGATAAAAGGTGGGACACAATAGATAAAGCAGCATTAGGATTTTTAGAAGGTGACATGAATGAGAATATGTTGATAACATATATAGCCCCAGATCTAATGATGCCTATAAAAGAATTTATAGATAAAATGAGTTTTGGTTTTCAAACAAAGGGATACGAAGAATTTAAAGGAACAAATTTGCTAGTAAGCATAGAATTTATAGGAAGATTAACTAATAGAAGTGCCTCCAAATACAAAATAAATGTAAATGACGTGATTGAAAATATGCACTCTAAGGGAATAACTTTCATGAGCCCTTTAAAAATAAGTTCTGAAGAAAGGGCAGGAGAAGAATGGAAAATTAGTGATTTAATTGAAAGCAAAACTTTGAGTCAGCCTGAAAATTTTATAAGTTATCAAAACAGTAAAGGAAATACAAGCATTAGATTTATAAATTACAAACCCAGAACCACAGATGACTTAGAAACAGAAGCATCTGATAGAAATATAATAGATAATAGAAGACATAGTGTTTCAGAGTTTATGGAAAAATTAGATCAAGAAAGTGAGATAAAATATTACGAAAATAAATTAAAGGAAATAAATGAAGAATATAATAACTCTATGAAGTGTGAGTGGCCTAAAATAAGAGATAAAGAACTTTATTTCTATAGAGAATTAGCTAGAGTAAAGAAAGTAAAGAAGAACGAAGATATGGCAGTAGAAATTTTTAAAAACCAAG---------------------AGCAAGATAAGCATGACAAAGAAGAGCAAAATCTTGGTAAAATTTTAAGTGAAGAAGAGCAATGGGCAGAGAATGAAAGATTATTTCTTGAAAGTTATGAAGAAGAAATTAATCTAATAAATGAGATGGAGAATATAGAAAATGAAATAGACAATACAGAACAATATAATGATTTTATAAACACATTAGATGAAGTAGGGTTACATAATCTTGATAATGCAATGGAAGCTATGGAAGTGGACTTAGGAACAGGAAAGAGAAAAAGATATGGAGAAGGTACTGTGAAAAACGAAGGAGAAAGAGAAAGACCAGCTAGGGCAGCAGGAAAATGGCCCCCTGATAGAGAAGAATTTTCATATAACTATATACCAGGTCAATATAGGCATATGGGTACAAAAAGAAGAGACTTTGAGAAGCCTGTTAAATTTCAAAACCAGAGGAGTGATGGTGCTATATTAAATTTAGCCGCACATGACCCTATTGATTGGCCTAATATTATTAGTATTTGGAAAGGTTTAATAGTTCAAAAATATATTCAAAACCAGCACAATATAGGAAGTAAAGTTGAAGATATGATAACCTACTTAGAAACATTCTTAGGTGAATCTGCTAAGATTCTATGGGAACAATGGGTTGAAAAGAATCCTAATAATTATGAAGAATTGAAAAGAGCTGGTAGCAATCCGCATAATTTTGCAAATGTTATATCTAACATTATTATAGCTGAAGATCCGGAATTAGGTTATACAACTTTGCAAAATGAAAGGTTAAAAGAAATAGAAAAATTAACGTTAACAAGTTGGAAAGGCATAAAAGAATTCTCCCAACATTATTTATATAATGCTACAACTGCTAAGCAAGGATACAATAAGGGAATAGTTGAGCGATATTTTAATAAACTACCTGACCCATTAGGTAGTATGATTTTTGAGGAATATAAAAAGGAAACTGAAGGAGCTGAAATTAATATTTCCCAAGCCATAACCTTCGTGTTCAAACAATTAAGAAAAATATGCACAGGAATACAAGCCCAAAGGTCTATGAAACACTCGGATTACAATTTCTGCAATAAAATAGTTCAAATACCCTTGTCATATGGAGAAGACAAGCCTAGAAGTAAAAGGATTTATAAACATCAAAATAGAAACCATAATAATATTAGAACAAAGAAAAGGTATTTCTTAAGAAGATCAGATAATAGAGCACCCTTCTTACATAAAAGAAATGTAAGAAGATATAATCCAAAGAAAACCTATGACAAAACATGCAGATGTTTTATATGCAACTCGCCAGATCATTTAAGTAGAACATGCCCAAATAAAGATCAAAAGAGATATTCTAGTAAATATGAAGAACAAGAGAGGGTTCTAATTATAGATAGCGTAAATGAAAATATATTAGTATGTGATGATGAAATAAAAGATGACGAGTCAATATATTCTATCATAGAAACAGACGAAGTTGAAACCATCAACGAAGAATATGAATCATCCGATGAAGAGTTAGATTTAATTGACGAATTAGCAGGTTTAAAGGTTGAAATGATGGATCAATTAAATTGTGAACATGATTGGATTAGAGGAAAGGGTGACTATAATATCAAATGTGCTTTTTGCATATATTATCCAAGTCAAGAAAATAGAGTGACTTGTAGTATATGTCTAAAACAAGCTTGTGCTGAATGTATAAAAGCAAATAAACAAAAATGGAGAAAAGAAATAGAATTAGAATCAGATGAAAAGACTTTATCTAGTAGAGTACGAGTGTTAGAAAATAGACTAAATAAACTAGAAGTAGAATTAGAGAACCTAAAAAATAATTGCGATATTAAGGCACTACCAGAGAATAAGGACATACAAAACACCGAATTTAAAGAGCAATTGATAACATTAAAAGACAGTAATACTGTTAAAATAATTCAACTAAGAGATGCCATAACTAATTTTGGAAATAAATATATAGTAAGATTGCCTTTCAAAGAAATATTAGGTATAAGAATCCCTGTTAAAATAAAATTGACACCCAAAGTATCTTATAAAATATTAGCACTAGTAGACACTGGGTGTACAAAGAATATTATTCATGACAAATATTTCACAAGATGTCCTGAAATAGTTCACACAATTGACGACAATAAGGCAGAAGTTTCCACAGACATGTCCGGAATAAAGAAAATTCATAATCAGTTAGCTTATAATATGGAGGTTTACATTAATGCAACTAAATATATAATAGATGAGATTACAATAAGAGATTTGTCAATGATTAATGATGACATGATAATTGGCCTAAGGTTCCTTCAACAATCAGTACAAACCACAGTAATACATGAGCAAGGAATTACTTTTATCCCATATCAAAATACTGTTCCATATATCTCAGAGGTACGAAAGCGTGGTGGAACCTCCCCCTCCCCAAAACCCGACAAACTCGACAACTTAGAAGTACCCAATCTCGAGCCTGAAGAAAGAATTAATGAATATGAGCTTAGTAAGAATATAGACAACTATTCTTTCTCATTATATCTTCCAAAATCTATAGAATTGCCAG--------------------------------------------------------------------------------------------------GTAAGACATCATGGGAAGATAGATAT-------------------------------------------------TTATTAAAAGCTACT-------------AAAGATTTTGAATATATATGCAG-----------------------------------------------------------------------------GGAAATGGCTTCACAGAAGTCTGAATGGCTCACAAAT----------------ATGAGTTCATGGAGACTGCCCCAACTGCCCA--------------GAGGCCATGGAGAACGATTTAATCACAATTTCAGAATAACAGAGCTACAACAAGGGTTATTAAACCTCTTGTGGCAAACAAAAAACAAAAAAGAAAAAGCTCATGCCT----------------TAAATGGCTTGGCATATTATT----TCAAAAATTTCGTGCCCTCAGAACAAAAGATAACAGAAAAAAGGGCTAAAATGCAAGATATCCCTCATCATGAAGAAAGGT---TACTAGATTATCGCGAGGA---------------GAAATCCCGTGATGGCCA------------AGATAAACTTCTCATGGAAGTCGAACAA------TCTATGGCAACAGATAAGAATACCAAGGTATTCTCAGATAAGATTTTGATCTCAGCAGAT---CCTGCTTCGAGCATGGTTGCTTTCCACATAAATATCAATAACCTATTGCAATCTTTCCCACATAATAAACCATCATCATCCACAAAAAGGCATGATATCATTCCCCAAACACCATACAT----------ACTGCATAATCATCCTAATTTATTCCTTCCACAATATATACTCCGGACTCAGCCAAAAGCACCATGTAGATCTTGTGCCTACA--------------AAGATTCTTGCAAAAAGAAACTTAAAAGCCAAAATCCCATGAGT--ACTACATACGAAAATCTCCAACCCAGATTAAGCTTCAAGACGGAACAAACTT----TATCCTGCTTTGGGCAAGACATCCTCGATCTTATTTGGCAAAAGTTTAAGGAGAGACAAATGAAAATATTCCTTGGACTCCAAGATT-----------------------------------------------------ATTTCTTTGATCTCTTAGAAGGG---------------------------------------------------------------AGAGAAAGAAACCCAGCCATACGAGTAATCATATATATGCTCCCTCTCTTAAGACTAGATAATCAGGCAATTTCTGACCCATCCTATAGA----------------------------------TTCCTGGTTCTCAAAGCTGAGATAAATCTTCAAAGATTCCGGAACCTA----CCCACATACAACCATGA----------AGAAATATCTCTCCAAACCATTATAGATCATGGTCTTGTGAATTCCATATATGCAACCCTCGATCAGATCCTTCAATCTGATTTAGGAAATGCTGTGAAAGATGTCTGCAGGAGACTTGGACATGGAAGATACA-------------------------GGATTATCTTCTCC-----------TCAATACCACCAA--AATTCACACCACCTGTTCGTCCAGCAATTCATTATATATATA--TCATGAAGGGACAAT--------------TTAATTTTCAAGAAGACGGTCTTAGCAAACT-------------ATCGGATGAAGA----GGAAGAAATATATACAACAGTTGCTAATCATGAAA---------------ATTGG----AGATTATTTTCTGAAGC--------------------------TGCAGAAA--TTGAAGAAGCTATCACCACAGATTATGAATATCAGCTGGTTTTCCAAAACAAGATCACAAGGATTTTTATCAGCAAATTCTACAACCAAAGTTATGAATACTTCAAGGGAGCAGGGCGCATAATTAAACCGGATT-------TTGGAAATGAATGCTCCAAGAAAAGTTACTACAGAAACCTGGCTCAGTGGTTTCAGAAAACAGAGCCATCAGAGATTGACACGGTACAATCAGCACCAATGATAATCAACGAAGATAATGAATAAAGATTTTGTCATCCCCGACAAAGATCACGATTCAAGATAAGGAATCTATA----CTATTCCAGAT-----AAGTATGGATCTTGGTGGCCATGGGCAACCAGATGAATAAATTAATATAAGCTAAATATGTTTTTCAATATATATTGATAATAGAATATCAATAATTTGGGCGTGGAAGAAGAATAAACGAATTTCAGAAGACTACTCAAGAAGGAATCCAGAAGAAGGAATCCAGAAGGACACCCTATAAAGCATAAAGGAACAATATAGGGTGCGGTGAATGACATATCCCTGTGAAGAATAA
>chr08:11227503-11234349F
TGGTATCAGAGCCTGGTAATCATAGAGAAGCTAAATTCAGAAGCTAATATTGGAAAGGTAATTACTACTAAAGATAATTTGAATATAAGGTGTAGACTAAATCATATTGAAGACCATAGTTGGCACTCTAACAATAGTCAATTAAATTTAATTGTTGATCTGATATATAATTTTTATATAAATTGGGATAAAAAGCAGGTAGATTTAGAGCAAAAGTTAGAAGATATATATAAAGAACAAAAGCAATTTGTAGAACAATATTCTTTTCTTAATAATAAGCTAAATACTACATTAGAATTATTAGAAGATTATAAGATAAGGCAAAATAAAATTTCACAGAATAGTGATTATATTAAAGAATTACTAGACAAAATCAACTCTAGTAAAGGTAAGGAAATAGTTTTGGCTTCATCTGGCATAGTCTCGTCTTCACAAGCCATTAATTCTGAAAAATGGACATATCTAGGAGTCTCTTTAGAAGAATAGCAAGCAGAGATGATAACTGTTCTGATAAACAAAAAGGTAAAAATGAAGACATAGATGAGCTTGAAGATATTGCAGAAGTAGACAAACAGCTCGAAAGATATCAACGAGATACTTTAAGGGCAATAAGACCTCAACAAATATATTGCATGGGATTTTTTGAGAATAAAAATGGGTTATATAGAATATCTAGAGAAGTAGAGTTAAGCGTTTTAACAAAGCCAGTTGAGCTAAAAATTGTAGCCAAGGAATTTGAAAATGGATTAAAGTATTCAGGGTATAAATATATTCACCAAGGTATGTATATAATAGGAATCAAAGGTATGACAAGAAAGAAATTAGGAGCTAAAGTTCTAATAACTCTGTTAGATAAAAGGTGGGACACAATAGATAAAGCAGCATTAGGATTTTTAGAAGGTGACATGAATGAGAATATGTTGATAACATATATAGCCCCAGATCTAATGATGCCTATAAAAGAATTTATAGATAAAATGAGTTTTGGTTTTCAAACAAAGGGATACGAAGAATTTAAAGGAACAAATTTGCTAGTAAGCATAGAATTTATAGGAAGATTAACTAATAGAAGTGCCTCCAAATACAAAATAAATGTAAATGACGTGATTGAAAATATGCACTCTAAGGGAATAACTTTCATGAGCCCTCTAAAAATAAGTTCTGAAGAAAGGGCAGGAGAAGAATGGAAAATTAGTGATTTAATTGAAAGCAAAACTTTGAGTCAGCCTGAAAATTATATAAGTTATCAAAATAGTAAAGGAAATACCAGCATTAGATTTATAAATTACAAACCCAGAACCACAGATGACTTAGAAACAGAAGCATCTGATAGAAATATAATAGATAATAGAAGACATAGTGTTTCAGAGTTTATGGAAAAATTAGATCAAGAAAGTGAGATAAAATATTACGAAAATAAATTAAAGGAAATAAATGAAGAATATAATAACTCTATGAAGTGTGAGTGGCCTAAAATAAGAGATAAAGAACTTTATTTCTATAGAGAATTAGCTAGAGTAAAGAAAGTAAAGAAGAATGAAGATATGGCAGTAGAAATTTTTAAAAACCAAG---------------------AGCAAGATAAGCATGACAAAGAAGAGCAAAATCTTGGTAAAATTTTAAGTGAAGAAGAGCAATGGGCAGAGAATGAAAGATTATTTCTTGAAAGTTATGAAGAAGAAATTAATCTAATAAATGAGATGGAGAATATAGAAAATGAAATAGACAATACAGAACAATATAATGATTTTATAAACACATTAGATGAAGTAGGGTTACATAATCTTGATAATGCAATGGAAGCTATGGAAGTGGACTTAGGAACAGGAAAGAGAAAAAGATATGGAGAAGGTACTGTGAAAAACGAAGGAGAAAGAGAAAGACCAGCTAGGGCAGCAGGAAAATGGCCCCCTGATAGAGAAGAATTTTCATATAACTATATACCAGGTCAATATAGGCATATGGGTACAAAGAGAAGAGACTTTGAGAAGCCTGTTAAATTTCAAAACCAGAGGAGTGATGGTGCTATATTAAATTTAGCCGCACATGACCCTATTGATTGGCCTAATATTATTAGTATTTGGAAAGGTTTAATAGTTCAAAAATATATTCAAAACCAGCACAATATAGGAAGTAAAGTTGAAGATATGATAACCTACTTAGAAACATTCTTAGGTGAATCTGCTAAGATTCTATGGGAACAATGGGTTGAAAAGAATCCTAATAATTATGAAGAATTGAAAAGAGCTGGTAGCAATCCGCATAATTTTGCAAATGTAGTATCTAATATTATCATAGCTGAAGATCCGGAATTAGGTTATACAACTTTGCAAAATGAAAGGTTAAAAGAAATAGAAAAATTAACGTTAACAAGTTGGAAAGGCATAAAAGAATTCTCCCAACATTATTTATATAATGCTACAACTGCTAAACAAGGATATAACAGGGGAATAGTTGAACGTTACTTTAATAAACTACCTGACCCATTAGGTAGTATGATTTTTGAGGAATATAAAAAGGAAACTGAAGGAGCTGAAATTAATATTTCCCAAGCCATAACCTTCGTGTTCAAACAATTAAGAAAAATATGCACAGGAATACAAGCCCAAAGGTCAATGAAACATTCTGATTATAATTTTTGCAATAAAATAGTTCAAATACCCTTGTCATATGGAGAAGACAAGCCTAGAAGTAAAAGGATTTATAAACATCAAAATAGAAACCATAATAATATTAGAACAAAGAAAAGGTATTTCTTAAGAAGATCAGATAATAGAGCACCCTTCTTACATAAAAGAAATGTAAGAAGATATAATCCAAAGAAAACCTATGACAAAACATGCAGATGTTTTATATGCAACTCGCCAGATCATTTAAGTAGAACATGCCCAAATAAAGATCAAAAGAGATATTCTAGTAAATATGAAGAACAAGAGAGGGTTCTAATTATAGATAGCGTAAATGAAAATATATTAGTATGTGATGATGAAATAAAAGATGACGAGTCAATATATTCTATCATAGAAACAGACGAAGTTGAAACCATCAACGAAGAATATGAATCATCCGATGAAGAGTTAGATTTAATTGACGAATTAGCAGGTTTAAAGGTTGAAATGATGGATCAATTAAATTGTGAACATGATTGGATTAGAGGAAAGGGTGACTATAATATCAAATGTGCTTTTTGCATATATTATCCAAGTCAAGAAAATAGAGTGACTTGTAGTATATGTCTAAAACAAGCTTGTGCTGAATGTATAAAAGCAAATAAACAAAAATGGAGAAAAGAAATAGAATTAGAATCAGATGAAAAGACTTTATCTAGTAGAGTACGAGTGTTAGAAAATAGACTAAATAAACTAGAAGTAGAATTAGAGAACCTAAAAAATAATTGCGATATTAAGGCACTACCAGAGAATAAGGACATACAAAACACCGAATTTAAAGAGCAATTGATAACATTAAAAGACAGTAATACTGCTAAAATAATTCAACTAAGAGATGCCATAACTAATTTTGGAAATAAATATATAGTAAGATTGCCTTTCAAAGAAATATTAGGTATAAGAATCCCTGTTAAAATAAAATTGACACCCAAAGTATCTTATAAAATATTAGCACTAGTAGACACTGGGTGTACAAAGAATATTATTCATGACAAATATTTCACAAGATGTCCTGAAATAGTTCACACAATTGACGACAATAAGGCAGAAGTTTCCACAGACATGTCCGGAATAAAGAAAATTCATAATCAGTTAGCTTATAATATGGAGGTTTACATTAATGCAACTAAATATATAATAGATGAGATTACAATAAGAGATTTGTCAATGATTAATGATGACATGATAATTGGCCTAAGGTTCCTTCAACAATCAGTACAAACCACAGTAATACATGAGCAAGGAATTACTTTTATCCCATATCAAAATACTGTTCCATATATCTCAGAGGTACGAAAGCGTGGTGGAACCTCCCCCTCCCCAAAACCCGACAAACTCGACAACTTAGAAGTACCCAATCTTGAGTCTGAAGAAAGAATTAATGAATATGAGCTTAGTGAGAATATAGACAACTATTCTTTCTCATCATATCTTCCAAAATCTATAGAATTGCCAG--------------------------------------------------------------------------------------------------GTAAGACATCATGGGAAGATAGATAT-------------------------------------------------TTATTAAAAGCTACT-------------AAAGATTTTGAATATATATGCAG-----------------------------------------------------------------------------GGAAATGGCTTCACAGAAGTCTGAATGGCTCACAAAT----------------ATGAGTTCATGGAGACTGCCCCAACTGCCCA--------------GAGGCCATGGAGAACGATTTAATCACAATTTCAGAATAACAGAGCTACAACATGGGTTATTAAATCTTTTGTGGCAAACAAAAAACAAAAAAGAAAAAGCTCATGCCT----------------TAAATAGCTTGGCATATTATT----TCAAAAATTTCGTGCCCTCAGATCAAAAGATAACAGAAAAAAGGGCTAAAATGCAAGATATCCCTCATCATGAAGAAAGGT---TACTAGATTATCGCGAGGA---------------GAAATCCCGTGATGGCCA------------AGATAAACTTCTCATGGAAGTCGAACAA------TCTATGGCAACAGATAAGAATACCAAGGTATTCTCAGATAAGATTTTGATCTCAGCAGAT---CCTGCTTCGAGCATGGTTGCTTTCCACATAAATATCAATAACCTATTGCAATCTTTCCCACATAATAAACCATCATCATCCACAAAAAGGCATGATATCATTCCCCAAACACCATACAT----------ACTGCATAATCATCCTAATTTATTCCTTCCACAATATATACTCCGGACTCAGCCAAAAGCACCATGTAGATCTTGTGCCTACA--------------AAGATTCTTGCAAAAAGAAACTTAAAAGCCAAAATCCCATGAGT--ACTACATACGAAAATCTCCAACCCAGATTAAGCTTCAAAACGGAACAAACTT----TATCCTGCTTTGGGCAAGACATCCTCGATCTTGTTTGGCAAAAGTTTAAGGAGAGACAAATGAAAATATTCCTTGGACTCCAAGATT-----------------------------------------------------ATTTCTTTGATCTTTTAGAAGGG---------------------------------------------------------------AGAGAAAGAAACCCAGCCATACGAGTAATCATATATATGCTCCCTCTCTTAAGACTAGATAATCAGGCAATTTCTGACCCATCCTATAGA----------------------------------TTCCTGGTTCTCAAAGCTGAGATAAATCTTCAAAGATTCCGGAACCTA----CCCACATACAACCATGA----------AGAAATATCTCTCCAAACCATTATAGATCATGGTCTTGTGAATTCCATATATGCAACCCTCGATCAGATCCTTCAATCTGATTTAGGAAATGCTGTGAAAGATGTCTGCAGGAGACTTGGACATGGAAGATACA-------------------------GGATTATCTTCTCC-----------TCAATACCACCAA--AATTCACACCACCTGTTCGTCCAGCAATTCATTATATATATA--TCATGAAGGGACAAT--------------TTAATTTTCAAGAAGACGGTCTTAGCAAACT-------------ATCGGATGAAGA----GGAAGAAATATATACAACAGTTGCTAATCATGAAA---------------ATTGG----AGATTATTTTCTGAAGC--------------------------TGCAGAAA--TTGAAGAAGCTATCACCACAGATTATGAATATCAGCTGGTTTTCCAAAACAAGATCACAAGGATTTTTATCAGCAAATTCTACAACCAAAGTTATGAATACTTCAAGGGAGCAGGGCGCATAATTAAACCGGATT-------TTGGAAATGAATGCTCCAAGAAAAGTTACTACAGAAACCTGGCTCAGTGGTTTCAGAAAACAGAGCCATCAGAGATTGACACGGTACAATCAGCACCAATGATAATCAACGAAGATAATGAATAAAGATTTTGTCATCCCCGACAAAGATCACGATTCAAGATAAGGAATCTATA----CTATTCCAGAT-----AAGTATGGATCTTGGTGGCCATGGGCAACCAGATGAATAAATTAATATAAGCTAAATATGTTTTTCAATATATATTGATAATAGAATATCAATAATTTGGGCGTGGAAGAAGAATAAACGAATTTCAGAAGACTACTCAAGAAGGAATCCAGAAGAAGGAATCCAGAAGGACACCCTATAAAGCATAAAGGAACAATATAGGGTGCGGTGAATGACATATCCCTGTGAAGAATAA
>chr08:11187207-11194062F
TGGTATCAGAGCC-AGTCATCATAGAGAAATCAAATTCAGAAGCTAATATTGGAAAGGTAATTACTACTAAAGATAATTTGAATATAAGGTGTAGACTAAATCATATTGAAGACCATAGTTGGCACTCTAACAATAGTCAATTAAATTTAATTGTTGATCTGATATATAATTTTTATATAAATTGGGATAAAAAGCAGGTAGATTTAGAGCAAAAGTTAGAAGATATATATAAAGAACAAAAGCAATTTGTAGAACAATATTCTTTTCTTAATAATAAGCTAAATACTACATTAGAATTATTAGAAGATTATAAGATAAGGCAAAATAAAATTTCACAGAATAGTGATTATATTAAAGAATTACTAGACAAAATCAACTCTAGTAAAGGTAAGGAAATAGTTTTGGCTTCAACAGGCATAATTACCTCGTCTCAAGCTATTAATTCAGAAAAATGGACCTATCTAGGAGTTTGTTTAGAAGAATAGCAAGCAGAGACGATAAATGTATTGATAAACAAAAAGGTAAAAATGAAGACATAGATGAGCTTGAGGATATTGCAGAAGTAGACAAACAGCTCGAAAGATATCAACGAGATACTTTAAGGGCAATAAGACCTCAACAAATATATTGCATGGGATTTTTTGAGAATAAAAATGGGTTATACAGAATATCTAGAGAAGTAGAGTTAAGCGTTTTAACAAAGCCAGTTGAGTTAAAAATTGTAGCCAAGGAATTTGAAAATGGATTAAAGTATTCAGGGTATAAATATATTCACCAAGGTATGTATATAATAGGAATCAAAGGTATGACAAGAAAGAAATTAGGAGCTAAAGTTCTAATAACTCTGTTAGATAAAAGGTGGGACACAATAGATAAAGCAGCATTAGGATTTTTAGAAGGAGACATGAATGAGAATATGTTGATAACATATATAGCCCCAGATCTAATGATGCCTATAAAAGAATTTATAGATAAAATGAGTTTTGGTTTTCAAACAAAGGGATACGAGGAATTTAAAGGAACAAATTTGCTAGTAAGCATAGAATTTATAGGAAGATTAACTAATAGAAGTGCCTCCAAATACAAAATAAATGTAAATGACGTGATTGAAAATATGCACTCTAAGGGAATAACTTTCATGAGCCCTTTAAAAATAAGTTCTGAAGAAAGGGCAGGAGAAGAATGGAAAATTAGTGATTTAATTGAAAGCAAAACTTTGAGTCAACCTGAAAATTATATAAGTTATCAAAATAGTAAAGGAAATACCAGCATTAGATTTATAAATTACAAACCCAGAACCACAGATGACTTAGAAACAGAAGCATCTGATAGAAATATAATAGATAATAGAAGACATAGTGTTTCAGAGTTTATGGAAAAATTAGATCAAGAAAGTGAGATAAAATATTACGAAAATAAATTAAAGGAAATAAATGAAGAATATAATAACTCTATGAAGTGTGAGTGGCCTAAAATAAGAGATAAAGAACTTTATTTCTATAGAGAATTAGCTAGAGTAAAGAAAGTAAAGAAGAACGAAGATATGGCAGTAGAAATTTTTAAAAACCAAG---------------------AGCAAGATAAGCATGACAAAGAAGAGCAAAATCTTGGTAAAATTTTAAGTGAAGAAGAGCAATGGGCAGAGAATGAAAGATTATTTCTTGAAAGTTATGAAGAAGAAATTAATCTAATAAATGAGATGGAGAATATAGAAAATGAAATAGACAATACAGAACAATATAATGATTTTATAAACACATTAGATGAAGTAGGGTTACATAATCTTGATAATGCAATGGAAGCTATGGAAGTGGACTTAGGAACAGGAAAGAGAAAAAGATATGGAGAAGGTACTGTGAAAAACGAAGGAGAAAGAGAAAGACCAGCTAGGGCAGCAGGAAAATGGCCCCCTGATAGAGAAGAATTTTCATATAACTATATACCAGGTCAATATAGGCATATGGGTACAAAGAGAAGAGACTTTGAGAAGCCTGTTAAATTTCAAAACCAGAGGAGTGATGGTGCTATATTAAATTTAGCCGCACATGACCCTATTGATTGGCCTAATATTATTAGTATTTGGAAAGGTTTAATAGTTCAAAAATATATTCAAAACCAGCACAATATAGGAAGTAAAGTTGAAGATATGATAACCTACTTAGAAACATTCTTAGGTGAATCTGCTAAGATTCTATGGGAACAATGGGTTGAAAAGAATCCTAATAATTATGAAGAATTGAAAAGAGCTGGTAGCAATCCGCATAATTTTGCAAATGTTATATCTAACATTATTATAGCTGAAGATCCGGAATTAGGTTATACAACTTTGCAAAATGAAAGGTTAAAAGAAATAGAAAAATTAACGTTAACAAGTTGGAAAGGCATAAAAGAATTCTCCCAACATTATTTATATAATGCTACAACTGCTAAACAAGGATATAACAGGGGAATAGTTGAACGTTACTTTAATAAACTACCTGACCCATTAGGTAGTATGATTTTTGAGGAATATAAAAAGGAAACTGAAGGAGCTGAAATTAATATTTCCCAAGCCATAACCTTCGTGTTCAAACAATTAAGAAAAATATGCACAGGAATACAAGCCCAAAGGTCAATGAAACATTCTGATTATAATTTTTGCAATAAAATAGTTCAAATACCCTTGTCATATGGAGAAGACAAGCCTAGAAGTAAAAGGATTTATAAACATCAAAATAGAAACCATAATAATATTAGAACAAAGAAAAGGTATTTCTTAAGAAGATCAGATAATAGAGCACCCTTCTTACATAAAAGAAATGTAAGAAGATATAATCCAAAGAAAACCTATGACAAAACATGCAGATGTTTTATATGCAACTCGCCAGATCATTTAAGTAGAACATGCCCAAATAAAGATCAAAAGAGATATTCTAGTAAATATGAAGAACAAGAGAGGGTTCTAATTATAGATAGCGTAAATGAAAATATATTAGTATGTGATGATGAAATAAAAGATGACGAGTCAATATATTCTATCATAGAAACAGACGAAGTTGAAACCATCAACGAAGAATATGAATCATCCGATGAAGAGTTAGATTTAATTGACGAATTAGCAGGTTTAAAGGTTGAAATGATGGATCAATTAAATTGTGAACATGATTGGATTAGAGGAAAGGGTGACTATAATATCAAATGTGCTTTTTGCATATATTATCCAAGTCAAGAAAATAGAGTGACTTGTAGTATATGTCTAAAACAAGCTTGTGCTGAATGTATAAAAGCAAATAAACAAAAATGGAGAAAAGAAATAGAATTAGAATCAGATGAAAAGACTTTATCTAGTAGAGTACGAGTGTTAGAAAATAGACTAAATAAACTAGAAGTAGAATTAGAGAACCTAAAAAATAATTGCGATATTAAGGCACTACCAGAGAATAAGGACATACAAAACACCGAATTTAAAGAGCAATTGATAACATTAAAAGACAGTAATACTGCTAAAATAATTCAACTAAGAGATGCCATAACTAATTTTGGAAATAAATATATAGTAAGATTGCCTTTCAAAGAAATATTAGGTATAAGAATCCCTGTTAAAATAAAATTGACACCCAAAGTATCTTATAAAATATTAGCACTAGTAGACACTGGGTGTACAAAGAATATTATTCATGACAAATATTTCACAAGATGTCCTGAAATAGTTCACACAATTGACGACAATAAGGCAGAAGTTTCCACAGACATGTCCGGAATAAAGAAAATTCATAATCAGTTAGCTTATAATATGGAGGTTTACATTAATGCAACTAAATATATAATAGATGAGATTACAATAAGAGATTTGTCAATGATTAATGATGACATGATAATTGGCCTAAGGTTCCTTCAACAATCAGTACAAATCACAGTAATACATGAGCAAGGAATTACTTTTATCCCATATCAAAATACTGTTCCATATATCTCAGAGGTACGAAAGCGTGGTGGAACCTCCCCCTCCCCAAAACCCGACAAACTCGACAACTTAGAAGTACCCAATCTTGAGTCTGAAGAAAGAATTAATGAATATGAGCTTAGTGAGAATATAGACAACTATTCTTTCTCATCATATCTTCCAAAATCTATAGAATTGCCAG--------------------------------------------------------------------------------------------------GTAAGACATCATGGGAAGATAGATAT-------------------------------------------------TTATTAAAAGCTACT-------------AAAGATTTTGAATATATATGCAG-----------------------------------------------------------------------------GGAAATGGCTTCACAGAAGTCTGAATGGCTCACAAAT----------------ATGAGTTCATGGAGACTGCCCCAACTGCCCA--------------GAGGCCATGGAGAACGATTTAATCACAATTTCAGAATAACAGAGCTACAACAAGGGTTATTAAATCTTTTGTGGCAAACAAAAAACAAAAAAGAAAAAGCTCATGCCT----------------TAAATGGCTTGGCATATTATT----TCAAAAATTTCGTGCCCTCAGATCAAAAGATAACAGAAAAAAGGGCTAAAATGCAAGATATCCCTCATCATGAAGAAAGGT---TACTAGATTATCGCGAGGA---------------GAAATCCCGTGATGGCCA------------AGATAAACTTCTCATGGAAGTCGAACAA------TCTATGGCAACAGATAAGAATACCAAGGTATTCTCAGATAAGATTTTGATCTCAGCAGAT---CCTGCTTCGAGCATGGTTGCTTTCCACATAAATATCAATAACCTATTGCAATCTTTCCCACATAATAAACCATCATCATCCACAAAAAGGCATGATATCATTCCCCAAACACCATACAT----------ACTGCATAATCATCCTAATTTATTCCTTCCACAATATATACTCCGGACTCAGCCAAAAGCACCATGTAGATCTTGTGCCTACA--------------AAGATTCTTGCAAAAAGAAACTTAAAAGCCAAAATCCCATGAGT--ACTACATACGAAAATCTCCAACCCAGATTAAGCTTCAAAACGGAACAAACTT----TATCCTGCTTTGGGCAAGACATCCTCGATCTTGTTTGGCAAAAGTTTAAGGAGAGACAAATGAAAATATTCCTTGGACTCCAAGATT-----------------------------------------------------ATTTCTTTGATCTTTTAGAAGGG---------------------------------------------------------------AGAGAAAGAAACCCAGCCATACGAGTAATCATATATATGCTCCCTCTCTTAAGACTAGATAATCAGGCAATTTCTGACCCATCCTATAGA----------------------------------TTCCTGGTTCTCAAAGCTGAGATAAATCTTCAAAGATTCCGGAACCTA----CCCACATACAACCATGA----------AGAAATATCTCTCCAAACCATTATAGATCATGGTCTTGTGAATTCCATATATGCAACCCTCGATCAGATCCTTCAATCTGATTTAGGAAATGCTGTGAAAGATGTCTGCAGGAGACTTGGACATGGAAGATACA-------------------------GGATTATCTTCTCC-----------TCAATACCACCAA--AATTCACACCACCTGTTCGTCCAGCAATTCATTATATATATA--TCATGAAGGGACAAT--------------TTAATTTTCAAGAAGACGGTCTTAGCAAACT-------------ATCGGATGAAGA----GGAAGAAATATATACAACAGTTGCTAATCATGAAA---------------ATTGG----AGATTATTTTCTGAAGC--------------------------TGCAGAAA--TTGAAGAAGCTATCACCACAGATTATGAATATCAGCTGGTTTTCCAAAACAAGATCACAAGGATTTTTATCAGCAAATTCTACAACCCAAGTTATGAATACTTCAAGGGAGCAGGGCGCATAATTAAACCGGATT-------TTGGAAATGAATGCTCCAAGAAAAGTTACTACAGAAACCTGGCTCAGTGGTTTCAGAAAACAGAGCCATCAGAGATTGACACGGTACAATCAGCACCAATGATAATCAACGAAGATAATGAATAAAGATTTTGTCATCCCCGACAAAGATCACTATTCAAGATAAGGAATCTACA----CTATT-CAGAT-----AAGTATGGATCTTGGTGGTCATGGGCAGCCAGATGAATAGAATTCTTTAAGCTAAATATGTTTTTCAATATATATTGATAATAGAATATCAATAATTTGGGCGTGGAAGAAGAATAAACGAATTTCAGAAGACTACTCAAGAAGGAATCCAGAAGAAGGAATCCAGAAGGACACCCTATAAAGCATAAAGGAACAATATAGGGTGCGGTGAATGACATATCCCTGTGAAGAATAA
>chr09:14493662-14495268F
------------------------------------------------------------------------------------------------------------------------------------------------------------------------------------------------------------------------------------------------------------------------------------------------------------------------------------------------------------------------------------------------------------------------------------------------------------------------------------------------------------------------------------------------------------------------------------------------------------------------------------------------------------------------------------------------------------------------------------------------------------------------------------------------------------------------------------------------------------------------------------------------------------------------------------------------------------------------------------------------------------------------------------------------------------------------------------------------------------------------------------------------------------------------------------------------------------------------------------------------------------------------------------------------------------------------------------------------------------------------------------------------------------------------------------------------------------------------------------------------------------------------------------------------------------------------------------------------------------------------------------------------------------------------------------------------------------------------------------------------------------------------------------------------------------------------------------------------------------------------------------------------------------------------------------------------------------------------------------------------------------------------------------------------------------------------------------------------------------------------------------------------------------------------------------------------------------------------------------------------------------------------------------------------------------------------------------------------------------------------------------------------------------------------------------------------------------------------------------------------------------------------------------------------------------------------------------------------------------------------------------------------------------------------------------------------------------------------------------------------------------------------------------------------------------------------------------------------------------------------------------------------------------------------------------------------------------------------------------------------------------------------------------------------------------------------------------------------------------------------------------------------------------------------------------------------------------------------------------------------------------------------------------------------------------------------------------------------------------------------------------------------------------------------------------------------------------------------------------------------------------------------------------------------------------------------------------------------------------------------------------------------------------------------------------------------------------------------------------------------------------------------------------------------------------------------------------------------------------------------------------------------------------------------------------------------------------------------------------------------------------------------------------------------------------------------------------------------------------------------------------------------------------------------------------------------------------------------------------------------------------------------------------------------------------------------------------------------------------------------------------------------------------------------------------------------------------------------------------------------------------------------------------------------------------------------------------------------------------------------------------------------------------------------------------------------------------------------------------------------------------------------------------------------------------------------------------------------------------------------------------------------------------------------------------------------------------------------------------------------------------------------------------------------------------------------------------------------------------------------------------------------------------------------------------------------------------------------------------------------------------------------------------------------------------------------------------------------------------------------------------------------------------------------------------------------------------------------------------------------------------------------------------------------------------------------------------------------------------------------------------------------------------------------------------------------------------------------------------------------------------------------------------------------------------------------------------------------------------------------------------------------------------------------------------------------------------------------------------------------------------------------------------------------CTTGGACATGGAAGATACA-------------------------GGATTATCTTCTCC-----------TCAATACCACCAA--AATTCACACCACCTGTTCGTCCAGCAATTCATTATATATATA--TCATGAAGGGACAAT--------------TTAATTTTCAAGAAGACGGTCTTAGCAAACT-------------ATCGGATGAAGA----GGAAGAAATATATACAACAGTTGCTAATCATGAAA---------------ATTGG----AGATTATTTTCTGAAGC--------------------------TGCAGAAA--TTGAAGAAGCTATCACCACAGATTATGAATATCAGCTGGTTTTCCAAAACAAGATCACAAGGATTTTTATCAGCAAATTCTACAACCAAAGTTATGAATACTTCAAGGGAGCAGGGCGCATAATTAAACCGGATT-------TTGGAAATGAATGCTCCAAGAAAAGTTACTACAGAAGCCTGGCTCAGTGGTTTCAGAAAACAGAACCATCAGAGATTGACACGGTACAATCAGCACCAATGATAATCAACGAAGATAATGAATAAAGATCTTGTCATCCCCGACAAAGATCACTATTCAAGATCAGGAATCTACA----CTATTCCAGAT-----AACAATGGATCTTGGTGGCCATGGGCAGCCAGATGAATAGAATTCTTTAAGCTAAATATGTTTTTCAATATATATTGATAATAGAATATCAATAATTTGGGCGTGGAAGAAGAATAAACGAATTTCAGAAGACTACTCAAGAAGGAATCCAGAAGAAGGAATCCAGAAAGACACCCTATAAAGCATAAAGGAACAATATAGGGTGCGGTGAATGACATATCCCTGTGAAGAATAA
>chr10:22712881-22719732R
TGGTATCAGAGCCTGGTAATCATAGAGAAGCTAAATTTAGAAGCTAATATTGGAAAGTTAATAAATACCAAAGATAATATCGACATAAGGTGTAGACTAAGCCATACTGAAGAACATAGTTGGCACTCTAATAATAGCCAACTAAATTTAATTGTAGATTTAATATATAATTTCTATATAAATTGGAGTAAGAGACAAGAAGATTTAGAGCAAAAGTTAGAAGATATATATAAAGAACAAAAGCAATTTGTAGAACAATATTCTTTTCTTAATAATAAGCTAAATACTACATTAGAATTATTAGAAGATTATAAGATAAGGCAAAATAAAATTTCACAGAATAGTGATTATATTAAAGAATTACTAGACAAAATCAACTCTAGTAAAGGTAAGGAAATAGTTTTGGCTTCATCTGGCATAGTCTCATCTTCACAAGCCATTAATTCTGAAAAATGGACATATCTAGGAGTCTCTTTAGAAGAATAGCAAGCAGAGATGATAACTGTTCTGATAAACAAAAAGGCAAATATGATGACATAGATGAGCTGAAAGATGTTGCACAAGTAGATAAGCAGCTCGAAAGATATCAACGAGATACTTTAAGGGCAATAAGGCCTCAACAAGTATACTGCATGGGATTTTTTGAGAATAAGAATGGGCTTTATAGAATATCTAGAGAAGTAGAATTAAGTGTTCTAACAAAGCCAGTAGAATTAAAAATAGTAGCTAAAGAATTTGAAAATAGTTTAAAATATTCAGGATATAAGTATATTCACCAAGGTATGTACATAATAGGAATCAAAGGAATGACAAGAAAGAAATTAGGAGCTAAAGTGCTAATAACCTTATTAGATAAAAGATGGGACACAATAAACAAAGCATCTTTAGGCTATCTAGAAGGAGATATGAATGAAAATATGTTGATAACCTATATAGCGCCTGATTTAATGATGCCTGTAAATGAATTCATAGATAAAATGAGTTTTGGTTTCCAAACAAAAGGATACGAAGAGTTTAAGGGAACAAATTTATTAATAAGTATAGAATTTATAGGAAGATTGACTAATAGAAGTGCCTCCAAATACAAAATCAATGTAAATGATGTGATAGAAAAAATGCATTCTAAAGGAATAAAATTCATGAGCCCTTTAATAATAGACTCTGAAGAAAGAGCAGGAGAAAAATGGCCAATTAGTGAATTTATAAAAAATAAAACCTTGAGTCAGCCTGAAAACTTCATAAGTTACCAAGACAGCAAAGGGAATGTTAGTATTAGATTTACAAATTATAAAACCAGAGCTTCGGATGATTTGGATGCAGAATCATCTGACAGAGATATTATAGATAACAGAAGACATAGTATATCTGAATTGATGGAAAAATTAGACCATGAAAGTGAAATAAAATATTATGAAGATAAATTAAGAGATATAGCAGATGAATATAATAACTCTATGAAAAGTGAGTGGCCTAAAATTAGAGACAAGGAACTTTATTTCTATAGAGAACTATCCAGGATTAAGAAACAAAAAAAAGAGAAAAGCTTGGTCATAGAAATCCCCAGAACCCAGGAAATTAAAATAGAACAAATAAAGTCAGAAGAACCAAGAGAAGAAATCCAAAAGTTAGATAAGGTATTAAGTGAGGAAGAGCAATGGGAAGTAAATGAGAAATTATTACTAGAGAGTTATGAAGAAGAAAACAACCTGATAGAGGAAATAGAGAATATAGAA---GAAGAAGATAATGCAGAACAATATAATGATTTTATAGACTCATTGGATGAGGAAGGTTTGCATAATCTAGATAATGCAATGGAAGCTATGGAAGTAGATTTGGGAACAGGAAAAAGGAAAAGATACGGAGAGGGTTCTGTAAAAAATGAAGGAGAAAGAGAAAGACCAGCCAGGGCAGCAGGAAGATGGCCTCCAGAAAAAGAAGAATATTCATATCATTATATCCCAGGACAGTATAGGCACATGGGCACTAAAAGAAGAGATTTTGAGAAACCAATAAAATTTCAAAATCAAAAAAGTGATGGGGCTATACTAAATCTAGCAGCACATGATCCCATAGACTGGCCAAATATCATTAGTATTTGGAAGGGGTTAATAGTTCAAAAATACATACAAAATCAGCATAATATAGGGAATAAGGTGGAGGATATGATAACTTATTTAGAAACATTTTTGGGTGAATCTGCTAAAGTCCTATGGGAACAATGGGTTGAAAAGAATCCTAATAACTATGAAGAGCTAAAAAGAGCAGGAAGTAATCCTCACAACTTTGAAAATATAGTATCTAATATTATCATAGCTGAAGACCCAGAATTAGGATATACAACCCTGCAAAATGAAAGATTAAAAGAAATAGAAAAATTAACTTTAACAAGCTGGAAAGGTATAAAGGAATTTTCTCAACATTATCTATATAATGCAACAACTGCTAAGCAAGGATACAATAAGGGAATAGTTGAGCGATATTTTAATAAACTACCTGACCCATTAGGTAGTATGATTTTTGAGGAATATAAAAAGGAAACTGAAGGAGCTGAAATTAATATTTCCCAAGCCATAACCTTCGTGTTCAAACAATTAAGAAAAATATGCACAGGAATACAAGCCCAAAGGTCAATGAAACATTCTGATTATAATTTTTGCAATAAAATAATACAAATACCTTTATCATATGGAGAAGATAGGCCTAGAAATAAAAGAAACCATAGATATCAAAGTAGAAATAGCAATAATATAAAGACAAAGAAAAGGTACTTCTTAAGAAGATCAGATAATAGAGCACCTTTCTTACATAAACGAAATGTAAGAAGATATAACCCAAAGAAAACTTATGATAAGACATGCAGATGTTTCATATGTAATTCACCAGATCATTTAAGTAGAACTTGCCCAAATAAAGATCAAAAAAGATATTCTAGTACATATGAAGAACAAGAGAGAGTTTTAATTATAGATAGCGTAAATGAAAATATATTAGTATGTGATGATGAAATAAAAGATGACGAATCAATATATTCTATCATAGAAACAGATGAAATTGAAAACACCAATGAAGAGTATGAATCAACCGATGAAGAGTTAGATTTAATTGACGAACTAGCCGGTTTAAAAATAGAATTGATGGATCAGTTAAATTGTGAACATGATTGGATTAGAGGAAAAGGAGATTATAACATTAAATGTGCTTTTTGCATCTATTACCCAAGCCAAGATAATAGAGTAACCTGTAGTATATGCTTAAAACAAGCTTGTGCTGAATGTATAAAAGCAAATAAACAAAAATGGAGAAAAGAGATAGAATTAGAATCAGATGAAAGGATATTATCTAGTAGAGTACGAGTTTTAGAAAACAGAATAAATAAACTAGAAGTGGAACTAGAGAATCTAAAAATTAACTATGATATTAAGGCATTACCAGAAAATAAGGATATACAAAATACCGAATTTAAAGAGCAAGTGATAACATTAAAAGACAGTAATACTGCTAAAATAATTCAACTAAAAGATGCCATAACTAATTTTGGAAATAAATATATAGTAAAACTGCCTTTCAAAGAAATTTTGGGAATAAGAATACCGGTAAAAGTAAAACTATCACCCAAGGTATCATATAAAATTCTAGCACTAGTAGACACTGGGTGTACAAAAAATATTATTCATGATAAGTACTTCATAAAATGTCCAGAAATAGTTCATACAATTGATGATAATAAGGCAGAAGTCTCTACAGACATGTCCGGAATAAAGAAAATTCATAATCAGCTAGCTCATAATGTTGAAGTATACATTAATGGAACTAAATATATAATAGATGAGATTACAATAAGAAACTTATCCATGATAAGTGATGACATGATAATTGGCCTAAGGTTTTTACAACAATCGGTACAAACCACAGTAATACATGAGCAAGGAATTACTTTTATCCCATATCAAAACAATGTGCCATATATCTCAGAGGTACGAAAGCGTGGTGGAGCCAGAAT---------------CAAACCCGACAACCTTGAAGCACTTAATCTTGAGTCTGAAGAAAGAATTAATGAATATGAGCTTAGTGAGAATATAGACAACTATTCTTTCTCATCATATCTTCCAAAATCTATGGAATTGCCAG--------------------------------------------------------------------------------------------------GTAAGACATCATGGGAAGATAGATAT-------------------------------------------------TTATTAAAAGCTACT-------------AAAGATTTTGAATATATATGCAG-----------------------------------------------------------------------------GGAAATGGCTTCACAGAAGTCTGAATGGCTCACAAAT----------------ATGAGTTCATGGAGACTGCCCCAACTGCCTA--------------GAGGCCATGGAGAACGATTTAATCACAATTTCAGAATAACAGAGCTACAACAAGGGTTATTAAACCTCTTGTGGCAAACAAAAAACAAAAAAGAAAAAGCTCATGCCT----------------TAAATGGCCTGGCATATTATT----TCAAAAATTTCGTGCCCTCAGATCAAAAGATAACAGAAAAAAGGGCTAAAATACAAGATATCCCTCATCATGAGGAAAGGT---TACTAGATTATCGCGAGGA---------------GAAATCCCGTGATGGCCA------------AGATAAACTTCCCATGGAAGTTGAACAA------TCTATGGCAACAGATAAGAATACCAAGGTATTCTCAGATAAGATTTTGATCTCAGCAGAT---CCTGCTTCGAGCATGGTTGCTTTCCACATAAATATCAATAACCTATTGCAATCTTTTCCACATAATAAACCATCATCATCCACAAAAAGGCATGATACCATTCCCCAAACACCATACAT----------ACTGCATAATCATCCTAATTTATTCCTTCCACAATATATACTCCGGACCCAGCCAAAAGCACCATGTAGATCTTGTGCCTACA--------------AAGATTCTTGCAAAAAGAAACTTAAAAGCCAAAATCCCATGAGT--ACTACATACGAAAATCTCCAACCCAGATTAAGCTTCAAAACGGAACAAACTT----TATCCTGCTTTGGGCAAGACATCCTCGATCTTGTTTGGCAAAAGTTTAAGGAGAGACAAATGAAAATATTCCTTGGACTCCAAGATT-----------------------------------------------------ATTTCTTTGATCTCTTAGAAGGG---------------------------------------------------------------AGAGAAAGAAACCCAGCCATACGAGTAATCATATATATGCTCCCTCTCTTAAGACTAGATGATCAGGCAATTTCTGACCCATCCTATAGA----------------------------------TTCCTGGTTCTCAAAGCTGAGATAAATCTTCAAAGATTCCGGAACCTA----CCCACATACAACCATGA----------AGAAATATCTCTCCAAACCATTATAGATCATGGTCTTGTGAATTCCATATATGCAACCCTCGATCAGATCCTTCAATCTGATTTAGGAAACGCTGTGAAAGATGTATGCAGGAGACTTGGACATGGAAGATACA-------------------------GGATTATCTTCTCC-----------TCAATACCACCAA--AATTCACACCACCTGTTCGTCCAGCAATTCATTATATATATA--TCATGAAGGGACAAT--------------TTAATTTTCAAGAAGACGGTCCTAGCAAACT-------------ATCGGATGAAGA----GGAAGAAATATATACAACAGTTGCTAATCATGAAA---------------ATTGG----AGATTATTTTCTGAAGC--------------------------TGCAGAAA--TTGAAGAAGCTATCACCACAGATTATGAATATCAGCTGGTTTTCCAAAACAAGATCACAAGGATTTTTATCAGCAAATTCTACAACCAAAGTTATGAATACTTCAAGGGAGCAGGGCGCATAATTAAACCGGATT-------TTGGAAATGAATGCTCCAAGAAAAGTTACTACAGAAGCCTGGCTCAGTGGTTTCAGAAAACAGAGCCATCAGAGATTGACACGGTGCAATCAGCACCAATGATAATCAACGAAGATAATGAATAAAGATCTTGTCATCCCCGACAAAGATCACTATTCAAGATAAGGAATCTACA----CTATTCCAGAT-----AAGTATGGATCTTGGTGGTCATGGGCAGCCAGATGAATAGAATTCTTTAAGCTAAATATGTTTTTCAATATATATTGATAATAGAATATCAATAATTTGGGCGTGGAAGAAGAAAAAACGAATTTCAGAAGACTACTCAAGGAGGAATCCAGAAGAAGGAATCCAGAAGGACACCCTAT-AAGCATAAAGGAACAATATAGGGTGCGGTGAATGACATATCACTGTGAAGAGTAA
>chr11:9620949-9626981R
TGGTATCAGAGCCTGGTAATCATAGAGAAGCTAAATTTAGAAGCTAATATTGGAAAGTTAATAAATACCAAAGATAATATCAACATAAGGTGTAGACTAAGCCATACTGAAGAACATAGTTGGCACTCTAATAATAGCCAACTAAATTTAATTGTAGATTTAATATATAATTTCTATATAAATTGGAGTAAGAGACAAGAAGATTTAGAGCAAAAGTTAGAAGATATATATAAAGAACAAAAGCAATTTGTAGAACAATATTCTTTTCTTAATAATAAGCTAAATACTACATTAGAATTATTAGAAGATTATAAGATAAGGCAAAATAAAATTTCACAGAATAGTGATTATATTAAAGAATTACTAGACAAAATCAACTCTAGTAAAGGTAAGGAAATAGTTTTGGCTTCATCTGGCATAGTCTCATCTTCACAAGCCATTAATTCTGAAAAATGGACATATCTAGGAGTCTCTTTAGAAGAATAGCAAGCAGAGATGATAACTGTTCTGATAAACAAAAAGGCAAATATGATGACATAGATGAGCTGAAAGATGTTGCACAAGTAGATAAGCAGCTCGAAAGATATCAACGAGATACTTTAAGGGCAATAAGGCCTCAACAAGTATACTGCATGGGATTTTTTGAGAATAAGAATGGGCTTTATAGAATATCTAGAGAAGTAGAATTAAGTGTTCTAACAAAGCCAGTAGAATTAAAAATAGTAGCTAAAGAATTTGAAAATAGTTTAAAATATTCAGGATATAAGTATATTCACCAAGGTATGTACATAATAGGAATCAAAGGAATGACAAGAAAGAAATTAGGAGCTAAAGTGCTAATAACCTTATTAGATAAAAGATGGGACACAATAAACAAAGCATCTTTAGGCTATCTAGAAGGAGATATGAATGGAAATATGTTGATAACCTATATAGCGCCTGATTTAATGATGCCTGTAAATGAATTCATAGATAAAATGAGTTTTGGTTTCCAAACAAAAGGATACGAAGAGTTTAAGGGAACAAATTTATTAATAAGTATAGAATTTATAGGAAGATTGACTAATAGAAGTGCCTCCAAATACAAAATCAATGTAAATGATGTGATAGAAAAAATGCATTCTAAAGGAATAAAATTCATGAGCCCTTTAATAATAGACTCTGAAGAAAGAGCAGGAGAAAAATGGCCAATTAGTGAATTTATAAAAAATAAAACCTTGAGTCAGCCTGAAAACTTCATAAGTTACCAAGACAGCAAAGGGAATGTTAGTATTAGATTTACAAATTATAAAACCAGAGCTTCGGATGATTTGGATGCAGAATCATCTGACAGAGATATTATAGATAACAGAAGACATAGTATATCTGAATTGATGGAAAAATTAGACCATGAAAGTGAAATAAAATATTATGAAGATAAATTAAGAGATATAGCAGATGAATATAATAACTCTATGAAAAGTGAGTGGCCTAAAATTAGAGACAAGAAACTTTATTTCTATAGAGAACTATCCAGGATTAAGAAACAAAAAAAAGAGAAAAGCTTGGCCATAGAAACCCCCAGAACCCAGGAAATTAAAATAGAACAAATAAAGTCAGAAGAACCAAGAGAAGAAATCCAAAAGTTAGATAAGGTATTAAGTGAGGAAGAGCAATGGGAAGTAAATGAGAAATTATTACTAGAGAGTTATGAAGAAGAAAATAACCTGATAGAGGAAATAGAGAATATAGAA---GAAGAAGATAATGCAGAACAATATAATGATTTTATAGACTCATTGGATGAGGAAGGTTTGCATAATCTAGATAATGCAATGGAAGCTATGGAAGTAGATTTGGGAACAGGAAAAAGGAAAAGATACGGAGAGGGTTCTGTAAAAAATGAAGGAGAAAGAGAAAGACCAGCCAGGGCAGCAGGAAGATGGCCTCCAGAAAAAGAAGAATATTCATATCATTATATCCCAGGACAGTATAGGCACATGGGCACTAAAAGAAGAGATTTTGAGAAACCAATAAAATTTCAAAATCAAAAAAGTGATGGGGCTATACTAAATCTAGCAGCACATGATCCCATAGACTGGCCTAATATTATTAGTATTTGGAAAGGTTTAATAGTTCAAAAATATATACAAAACCAGCACAATATAGGAAGTAAAGTTGAAGATATGATAACCTACTTAGAAACATTTTTAGGTGAATCTGCTAAGGTTCTATGGGAACAATGGGTTGAAAAGAATCCTAATAATTATGAAGAATTGAAAAGAGCTGGTAGCAATCCGCATAATTTTGCAAATGTTATATCTAACATTATTATAGCTGAAGATCCGGAATTAGGTTATACAACTTTGCAAAATGAAAGGTTAAAAGAAATAGAAAAATTAACGTTAACAAGTTGGAAAGGCATAAAAGAATTCTCCCAACATTATTTATATAATGCTACAACTGCTAAACAAGGATATAACAGGGGAATAGTTGAACGTTACTTCAATAAATTACCTGACCCACTAGGAAGTATGATATTTGAAGAATATAAAAAGGAAACTGAAGGAGCTGAAATCAATATCTCTCAAGCCATAACTTTTGTGTTTAAGCAACTAAGAAAAATATGCACGGGTATCCAAGCCCAAAGATCTATGAAACACTCGGATTACAATTTCTGCAATAAAATAGTTCAAATACCCTTGTCATATGGAGAAGACAAGCCTAGAAGTAAAAGGATTTATAAACATCAAAATAGAAACCATAATAATATTAGAACAAAGAAAAGGTATTTCTTAAGAAGATCAGATAATAGAGCACCATTCTTACATAAAAGAAATGTAAGAAGATATAATCCAAAGAAAACCTATGACAAAACATGCAGATGTTTTATATGCAACTCGCCAGATCATTTAAGTAGAACATGCCCAAATAAAGATCAAAAGAGATATTCTAGTAAATATGAAGAACAAGAGAGGGTTCTAATTATAGATAGCGTAAATGAAAACATATTAGTATGTGATGATGAAATAAAAGATGACGAGTCAATATATTCTATCATAGAAACAGACGAAGTTGAAACTATCAACGAAGAATATGAATCATCCGATGAAGAGTTAGATTTAATTGACGAATTAGCAGGTCTAAAGGTTGAAATGATGGATCAATTAAATTGTGAACATGATTGGATTAGAGGAAAGGGTGACTATAATATCAAATGTGCTTTTTGCATATATTACCCTAGTCAAGAAAATAGAGTGACTTGTAGTATATGTCTAAAACAAGCTTGTGCTGAATGTATAAAAGCAAATAAACAAAAATGGAGAAAAGAAATAGAATTAGAATCAGATGAAAAGATTTTATCTAGTAGAGTACGAGTGTTAGAAAATAGACTAAATAAATTAGAAATAGAATTAGAGAACCTAAAAAATAATTGTGATATTAAAGCATTACCAGAAAATAAGGACATACAAAACACCGAATTTAAAGAGCAATTGATAACACTAAAAGACAGTAATACTGCTAAAATAATTCAACTAAGAGATGCCATAACTAATTTTGGAAATAAATATATAGTAAGATTGCCTTTCAAAGAAATATTAGGTATAAGAATCCCTGTTAAAGTAAAATTGACACCCAAAGTATCTTATAAAATATTAGCACTAGTAGACACTGGGTGTACAAAGAATATTATTCATGACAAATATTTCACAAGATGTCCTGAAATAGTTCACACAATTGACGACAATAAGGCAGAAGTTTCCACAGACATGTCCGGAATAAAGAAAATTCATAATCAGTTAGCTTATAATATGGAGGTTTACATTAATGCAACTAAATATATAATAGATGAGATTACAATAAGAGATTTGTCAATGATTAATGATGACATGATAATTGGCCTAAGGTTCCTTCAACAATCAGTACAAACCACAGTAATACATGAGCAAGGAATTACTTTTATCCCATATCAAAATAATGTTCCATATATCTCAGAGGTACGAAAGTGTGGTGGAGTCTCCCC---------------CAAACTCGACAACTTAGAAGTACCTAATCTTGAGTCTGAAGAAAGAATTAATGAATATGAGCTTAGTGAGAATATAGACAACTATTCTTTCTCATCATATCTTCCAAAATCTATGGAATTGCCAG--------------------------------------------------------------------------------------------------GTAAGACATCATGGGAAGATAGATAT-------------------------------------------------TTATTAAAAGCTACT-------------AAAGATTTTGAATATATATGCAG-----------------------------------------------------------------------------GGAAATGGCTTCACAGAAGTCTGAATGGCTCACAAAT----------------ATGAGTTCATGGAGACTGCCCCAACTGCCCA--------------GAGGCCATGGAGAACGATTTAATCACAATTTCAGAATAACAGAGCTACAACAAGGGTTATTAAACCTCTTGTGGCAAACAAAAAACAAAAAAGAAAAAGCTCATGCCT----------------TAAATGGCCTGGCATATTATT----TCAAAAATTTCGTGCCCTCAGATCAAAAGATAACAGAAAAAAGGGCTAAAATACAAGATATCCCTCATCATGAGGAAAGGT---TACTAGATTATCGCGAGGA---------------GAAATCCCGTGATGGCCA------------AGATATACTTCCCATGGAAGTTGAACAA------TCTATGGCAACAGATAAGAATACCAAGGTATTCTCAGATAAGATTTTGATCTCAGCAGAT---CCTGCTTCGAGCATGGTTGCTTTCCACATAAATATCAATAACCTATTGCAATCTTTTCCACATAATAAACCATCATCATCCACAAAAAGGCATGATACCATTCCCCAAACACCATACAT----------ACTGCATAATCATCCTAATTTATTCCTTCCACAATATATACTCCGGACCCAGCCAAAAGCACCATGTAGATCTTGTGCCTACA--------------AAGATTCTTGCAAAAAGAAACTTAAAAGCCAAAATCCCATGAGT--ACTACATACGAAAATCTCCAACCCAGATTAAGCTTCAAAACGGAACAAACTT----TATCCTGCTTTGGGCAAGACATCCTCGATCTTGTTTGGCAAAAGTTTAAGGAGAGACAAATGAAAATATTCCTTGGACTCCAAGATT-----------------------------------------------------ATTTCTTTGATCTCTTAGAAGGG---------------------------------------------------------------AGAGAAAGAAACCCAGCCATACGAGTAATCATATATATGCTCCCTCTCTTAAGACTAGATGAACAGGCAATTTCTGACCCATCCTATAGA----------------------------------TTCCTGGTTCTCAAAGCTGAGATAAATCTTCAAAGATTCCGGAACCTA----CCCACATACAACCATGA----------AGAAATATCTCTCCAAACCATTATAGATCATGGTCTTGTGAATTCCATATATGCAACCCTCGATCAGATCCTTCAATCTGATTTAGGAAACGCTGTGAAAGATGTATGCAGGAGACTTGGACATGGAAGATACA-------------------------GGATTATCTTCTCC-----------TCAATACCACCAA--AATTCACACCACCTGTTCGTCCAGCAATTCATTATATATATA--TCATGAAGGGACAAT--------------TTAATTTTCAAGAAGACGGTCCTAGCAAACT-------------ATTGGATGAAGA----GGAAGAAATATATACAACAGTTGCTAATCATGAAA---------------ATTGG----AGATTATTTTCTGAAGC--------------------------TGCAGAAA--TTGAAGAAGCTATCACCACAGATTATGAATATCAGCTGGTTTTCCAAAACAAGATCACAAGGATTTTTATCAGCAAATTCTACAACCAAAGTTATGAATACTTCAAGGGAGCAGGGCGCATAATTAAACCGGATT-------TTGGAAATGAATGCTCCAAGAAAAGTTACTACAGAAGCCTGGCTCAGTGGTTTCAGAAAACAGAGCCATCAGAGATTGACACGGTGCAATCAGCACCAATGATAATCAACGAAGATAATGAATAAAGATCTTGTCATCCCCGACAAAGATCACTATTCAAGATAAGGAATCTACA----CTATTCCAGAT-----AAGTATGGATCTTGGTGGTCATGGGCAGCCAGATGAATAGAATTCTTTAAGCTAAATATGTTTTTCAATATATATTGATAATAGAATATCAATAATTTGGGCGTGGAAGAAGAATAAAAGAAATTCAGAAGATTACTC--------------AAGAAAGAATCCAAAAGGACACCCTATAAAGGATAAGGGAACAATATAAGGTGCGGTGAATGACATATCACTGTGAAGAATAA
>chr12:22979220-22982951R
----------------------------------------------------------------------------------------------------------------------------------------------------------------------------------------------------------------------------------------------------------------------------------------------------------------------------------------------------------------------------------------------------------------------------------------------------------------------------------------------------------------------------------------------------------------------------------------------------------------------------------------------------------------------------------------------------------------------------------------------------------------------------------------------------------------------------------------------------------------------------------------------------------------------------------------------------------------------------------------------------------------------------------------------------------------------------------------------------------------------------------------------------------------------------------------------------------------------------------------------------------------------------------------------------------------------------------------------------------------------------------------------------------------------------------------------------------------------------------------------------------------------------------------------------------------------------------------------------------------------------------------------------------------------------------------------------------------------------------------------------------------------------------------------------------------------------------------------------------------------------------------------------------------------------------------------------------------------------------------------------------------------------------------------------------------------------------------------------------------------------------------------------------------------------------------------------------------------------------------------------------------------------------------------------------------------------------------------------------------------------------------------------------------------------------------------------------------------------------------------------------------------------------------------------------------------------------------------------------------------------------------------------------------------------------------------------------------------------------------------------------------------------------------------------------------------------------------------------------------------------------------------------------------------------------------------------------------------------------------------------------------------------------------------------------------------------------------------------------------------------------------------------------------------------------------------------------------------------------------------------------------GATGGATCAATTAAATTGTGAACATGATTGGATTAGAGGAAAGGGTGACTATAATATCAAATGTGCTTTTTGCATATATTACCCTAGTCAAGAAAATAGAGTGACTTGTAGTATATGTCTAAAACAAGCTTGTGCTGAATGTATAAAAGCAAATAAACAAAAATGGAGAAAAGAAATAGAATTAGAATCAGATGAAAAGATTTTATCTAGTAGAGTACGAGTGTTAGAAAATAGACTAAATAAATTAGAAATAGAATTAGAGAACCTAAAAAATAATTGTGATATTAAAGCATTACCAGAAAATAAGGACATACAAAACACCGAATTTAAAGAGCAATTGATAACACTAAAAGACAGTAATACTGCTAAAATAATTCAACTAAGAGATGCCATAACTAATTTTGGAAATAAATATATAGTAAGATTGCCTTTCAAAGAAATATTAGGTATAAGAATCCCTGTTAAAGTAAAATTGACACCCAAAGTATCTTATAAAATATTAGCACTAGTAGACACTGGGTGTACAAAGAATATTATTCATGACAAATATTTCACAAGATGTCCTGAAATAGTTCACACAATTGACGACAATAAGGCAGAAGTTTCCACAGACATGTCCGGAATAAAGAAAATTCATAATCAGTTAGCTTATAATATGGAGGTTTACATTAATGCAACTAAATATATAATAGATGAGATTACAATAAGAGATTTGTCAATGATTAATGATGACATGATAATTGGCCTAAGGTTCCTTCAACAATCAGTACAAACCACAGTAATACATGAGCAAGGAATTACTTTTATCCCATATCAAAATAATGTTCCATATATCTCAGAGGTACGAAAGCGTGGTGGAATCTCCCC---------------CAAACTCGACAACTTAGAAGTACCTAATCTTGAGTCTGAAGAAAGAATTAATGAATATGAGCTTAGTGAGAATATAGACAACTATTCTTTCTCATCATATCTTCCAAAATCTATGGAATTGCCAG--------------------------------------------------------------------------------------------------GTAAGACATCATGGGAAGATAGATAT-------------------------------------------------TTATTAAAAGCTACT-------------AAAGATTTTGAATATATATGCAG-----------------------------------------------------------------------------GGAAATGGCTTCACAGAAGTCTGAATGGCTCACAAAT----------------ATGAGTTCATGGAGACTGCCCCAACTGCCCA--------------GAGGCCATGGAGAACGATTTAATCACAATTTCAGAATAACAGAGCTACAACAAGGGTTATTAAACCTCTTGTGGCAAACAAAAAACAAAAAAGAAAAAGCTCATGCCT----------------TAAATGGCCTGGCATATTATT----TCAAAAATTTCGTGCCCTCAGATCAAAAGATAACAGAAAAAAGGGCTAAAATACAAGATATCCCTCATCATGAGGAAAGGT---TACTAGATTATCGCGAGGA---------------GAAATCCCGTGATGGCCA------------AGATAAACTTCGCATGGAAGTTGAACAA------TCTATGGCAACAGATAAGAATACCAAGGTATTCTCAGATAAGATTTTGATCTCAGCAGAT---CCTGCTTCGAGCATGGTTGCTTTCCACATAAATATCAATAACCTATTGCAATCTTTTCCACATAATAAACCATCATCATCCACAAAAAGGCATGATACCATTCCCCAAACACCATACAT----------ACTGCATAATCATCCTAATTTATTCCTTCCACAATATATACTCCGGACCCAGCCAAAAGCACCATGTAGATCTTGTGCCTACA--------------AAGATTCTTGCAAAAAGAAACTTAAAAGCCAAAATCCCATGAGT--ACTACATACGAAAATCTCCAACCCAGATTAAGCTTCAAAACGGAACAAACTT----TATCCTGCTTTGGGCAAGACATCCTCGATCTTGTTTGGCAAAAGTTTAAGGAGAGACAAATGAAAATATTCCTTGGACTCCAAGATT-----------------------------------------------------ATTTCTTTGATCTCTTAGAAGGG---------------------------------------------------------------AGAGAAAGAAACCCAGCCATACGAGTAATCATATATATGCTCCCTCTCTTAAGACTAGATGATCAGGCAATTTCTGACCCATCCTATAGA----------------------------------TTCCTGGTTCTCAAAGCTGAGATAAATCTTCAAAGATTCCGGAACCTA----CCCACATACAACCATGA----------AGAAATATCTCTCCAAACCATTATAGATCATGGTCTTGTGAATTCCATATATGCAACCCTCGATCAGATCCTTCAATCTGATTTAGGAAACGCTGTGAAAGATGTATGCAGGAGACTTGGACATGGAAGATACA-------------------------TGATTATCTTCTCC-----------TCAATACCACCAA--AATTCACACCACCTGTTCGTCCAGCAATTCATTATATATATATATCATGAAGGGACAAT--------------TTAATTTTCAAGAAGACGGTCCTAGCAAACT-------------ATCGGATGAAGA----GGAAGAAATATATACAACAGTTGCTAATCATGAAA---------------ATTGG----AGATTATTTTCTGAAGC--------------------------TGCAGAAA--TTGAAGAAGCTATCACCACAGATTATGAATATCAGCTGGTTTTCCAAAACAAGATCACAAGGATTTTTATCAGCAAATTCTACAACCAAAGTTATGAATACTTCAAGGGAGCAGGGCGCATAATTAAACCGGATT-------TTGGAAATGAATGCTCCAAGAAAAGTTACTACAGAAGCCTGGCTCAGTGGTTTCAGAAAACAGAGCCATCAGAGATTGACACGGTGCAATCAGCACCAATGATAATCAACGAAGATAATGAATAAAGATCTTGTCATCCCCGACAAAGATCACTATTCAAGATAAGGAATCTACA----CTATTCCAGAT-----AAGTATGGATCTTGGTGGTCATGGGCAGCCAGATGAATAGAATTCTTTAAGCTAAATATGTTTTTCAATATATATTGATAATAGAATATCAATAATTTGGGCGTGGAAGAAGAAAAAACGAATTTCAGAAGACTACTCAAGGAGGAATCCAGAAGAAGGAATCCAGAAGGACACCCTAT-AAGCATAAAGGAACAATATAGGGTGCGGTGAATGACATATCCCTGTGAAGAATAA
>chr07:17891315-17898642R
-------------------------AGAAGCTAAATTTAGAAGCTAATATTGGAAAGTTAATAAATACCAAAGATAATATCAACATAAGGTGTAGATTAAGCCATACTGAAGAACATAGTTGGCACTCTAATAATAGCCAACTAAATTTAATTGTAGATTTAATATATAATTTCTATATAAATTGGGGTAAGAGACAAGAAGATTTAGAGCAAAAGTTAGAAGATATATATAAAGAACAAAAGCAATTTGTAGAACAATATTCTTTTCTTAATAATAAGCTAAATACTACATTAGAATTATTAGAAGATTATAAGATAAGGCAAAATAAAATTTCACAGAATAGTGATTATATTAAAGAATTACTAGACAAAATCAACTCTAGTAAAGGTAAGGAAATAGTTTTGGCTTCATCTGGCATAGTCTCATCTTCACAAGCCATTAATTCTGAAAAATGGACATATCTAGGAGTCTCTTTAGAAGAATAGCAAGCAGAGATGATAACTGTTCTGATAAACAAAAAGGCAAATATGATGACATAGATGAGTTGAAAGATGTTGCACAAGTAGATAAGCAGCTCGAAAGATATCAACGAGATACTTTAAGGGCAATAAGACCTCAACAAGTATACTGCATGGGATTTTTTGAGAATAAGAATGAGCTATATAGAATATCTAGAGAAGTAGAATTAAGTGTTCTAAGAAAACCAGTAGAATTAAAAATAGTAGCTAAAGAATTTGAAAATAGTTTAAAATATTCAGGATATAAGTATATTCACCAAGATATGTACATAATAGGAATCAAAGGAATGACAAGAAAGAAATTAGGAGCTAAAGTGTTAATAACCTTATTAGATAAAAGATGGGACACAATAAACAAAGCATCTTTAGGCTATCTAGAAGGAGATATGAATGAAAATATGTTGATAACCTATATAGCGCCTGATTTAATGATGCCTGTAAATGAATTCATAGATAAAATGAGTTTTGGTTTTCAAACAAAAGGATACGAAGAGTTTAAGGGAACAAATTTATTAATAAGTATAGAATTTATAGGAAGATTGACTAATAGAAGTGCCTCCAAATACAAAATCAATGTAAATGATGTGATAGAAAAAATGCATTCTAAAGGAATAAAATTTATGAGCCCTTTAACAATAGACTCTGAAGAAAGAGCAGGAGAAAAATGGCCAATTAGTGAATTTATAAAAAATAAAACCTTGAGTCAGCCTGAAAACTTCATAAGTTACCAAGACAGCAAAGGGAATGTTAGTATTAGATTTACAAATTATAAAACCAGAGCTTCGGATGATTTGGATGCAGAATCATCTGACAGAAATATTATAGATAACAGAAGACATAGTATATCTGAATTGATGGAAAAATTAGACCATGAAAGTGAAATAAAATATTATGAAGATAAATTAAGAGATATAGCAGATGAATATAATAACTCTATGAAAAGTGAGTGGCCTAAAATTAGAGACAAGGAACTTTATTTCTATAGAGAACTATCCAGGATCAAGAAACAAAAAAAAGAGAAAAGCTTGGCCATAGAAACCCCCAGAACCCAGGAAATTAAAATAGAACAAATAAAGTCAGAAGAACCAAGAGAAGAAATCCAGAAGTTTGATAAGGTATTAAGTGAGGAAGAGCAATGGGAAGTAAATGAGAAATTATTACTAGAGAGTTATGAAGAAGAAAACAACCTGATAGAGGAAATAGAGAATATAGAA---GAAGAAGATAATGCAGAACAATATAATGATTTTATAGACTCATTGGATGAGGTAGGTTTGCATAATCTAGATAATGCAATGGAAGCTATGGAAGTAGATTTGGGAACAGGAAAAAGGAAAAGATACGGAGAGAGTTCTGTAAAAAATGAAGGAGAAAGAGAAAGACCAGCCAGGGCAGCAGGAAGATGGCCTCCAGAAAAAGAAGAATATTCATATCATTATATCCCAGGACAGTATAGGCACATGGGCACTAAAAGAAGAGATTTTGAGAAACCAATAAAATTTCAAAATCAAAATAGTGATGGGGCTATACTAAATCTAGCAGCACATGATCCCATAGACTGGCCAAATATCATTAGTATTTGGAAGGGGTTAATAGTTCAAAAATACATACAAAATCAGCATAATATAGGGAATAAGGTGGAGGATATGATAACTTATTTAGAAACATTTTTGGGTGAATCTGCTAAAGTCCTATGGGAACAATGGGTTGAAAAGAATCCTAATAACTACGAAGAGCTAAAAAGAGCAGGAAGTAATCCTCACAACTTTGCAAATATAGTATCTAATATTATCATAGCTGAAGACCCAGAATTAGGATATACAACCCTGCAAAATGAAAGATTAAAAGAAATAGAAAAATTAACTTTAACAAGCTGGAAAGGTATAAAGGAATTTTCTCAACATTATCTATATAATGCAACAACTGCTAAGCAAGGATACAATAAGGGAATAGTTGAGCGATATTTTAATAAACTACCTGACCCATTAGGTAGTATGATTTTTGAGGAATATAAAAAGGAAACTGAAGGAGCTGAAATTAATATTTCCCAAGCCATAACCTTCGTGTTCAAACAATTAAGAAAAATATGCACAGGAATACAAGCCCAAAGGTCAATGAAACATTCTGATTATAATTTTTGCAATAAAATAATACAAATACCTTTATCATATGGAGAAGATAGGCCTAGAAATAAAAGAAACCATAGATATCAAAGTAGAAATAGCAATAATATAAAGACAAAGAAAAGGTACTTCTTAAGAAGATCAGATAATAGAGCACCATTCTTACATAAACGAAATGTAAGAAGATATAACCCAAAGAAAACTTATGATAAGACATGCAGATGTTTCATATGTAATTCACCAGATCATTTAAGTAGAACTTGCCCAAATAAAGATCAAAAAAGATATTCTAGTAAATATGAAGAACAATAGAGAGTTTTAATTATAGATAGCATAAATGAAAATATATTAGTATGTGACGATGAAATAAAAGATGACGAATCAATATATTATATCATAGAAACAGATGAAATTGAAAACACCAATGAAGAGTATGAATCAACCGATGAAGAGTTAAATTTAATTGACGAACTAGCCAGTTTAAAAATAGAAATGATGGATCAGTTAAATTGTGAACATGATTGGATTAGAGGAAAAGGAGATTATAACATTAAATGTGCTTTTTGCATCTATTACCCAAGCCAAGATAATAGAGTAACCTGTAGTATATGCTTAAAACAAGCTTGTGCTGAATGTATAAAAGCAAATAAACAAAAATGGAGAAAAGAGATAGAATTAGAATCAGATGAAAGGATATTATCTAGTAGAGTACGAGTTTTAGAAAACAGAATAAATAAACTAGAAGTAGAACTAGAGAACCTAAAAATTAACTATGATATTAAGGCATTACCAGAAAATAAGGATATACAAAATACCGAATTTAAAGAGCAAGTGATAACATTAAAAGACAGTAATACTGCTAAAATAATTCAACTAAAAGATGCCATAACTAATTTTGGAAATAAATATATAGTAAAATTGCCTTTCAAAGAAATTTTGGGAATAAGAATACCGGTAAAAGTAAAACTATCACCCAAGGTATCATATAAAATTCTAGCACTAGTAGACACTGGGTGTACAAAAAATATTATTCATGATAAGTACTTTATAAAATGTCCAGAGATAGTTCATACAATTGATGATAATAAGGCAGAAGTCTCTACAGACATGTCCGGAATAAAGAAAATTCATAATCAGTTAGCTCATAATGTTGAAGTATACATTAATGGAACTAAATATATAATAGATGAGATTACAATAAGAAACTTATCCATGATAAGTGATGACATGATAATTGGCCTAAGGTTTTTACAACAATCGGTACAAACCACAGTAATACATGAGCAGGGAATTACTTTTATTCCATATCAAAACAATGTACCATATATCTCAGAGGTACGAAAGCGTGGTGGAGCCAGAAT---------------CAAACCCGACAACCTTGAAGCACTTAACCTTGAGTCTGAAGAAAGAATTAATGAATATGAACTTAGTGAGAATATAGACATCTATTATATATCAAATTCCAATATAGAGTGCATAGGATTACAAGCATTTGCACCAAATTGGTATAGGGATATTAAGTCTAAAAAGGATATAGAAAAAATTGTTCAAAGATTAGAGGATATTCAAATTATAGGAGAAATTCCTATGAAATATTGGGAGAAAAACGCTATCGAGTGTAAAATTAATATATTAAACCCAGAATATATTATTAAGACCAGCCCAATAGAAGCAACTCCGAAAGATATAGAAGAATTTAAGATGCATATAGAAGAACTGCTGAAACTAGGAGCAATAAGAGAGAGTAGAAGTCCACATAGGTCTGCAGCTTTTATAGTAAGAAATCATGCGGAAGAAGTTAGAGGTAAATCTAGGATGGTCATAAATTATAAAAGGCTAAATGATAATACTATAGAAGATGCCTATAATATCCCAAATAAGCAAGAATGGATTAATAGGATACAAGGTAGCAAATATTTCTCGAAATTTGACTTAAAAGCTGGGTTTTGGCAAGTAAAAATGGCAGAAGAGTCTATAGAATGGACTGCATTCACCTGTCCCCAGGGACACTATGAATGGCTAGTGATGCCACTAGGATTAAAAAATGCACCTGCCCTATTTCAAAGA-----------------AAAATGCAAAACATTTTTAACGATAATCAAGAATTTGTGTTAGTATATATAGATGACTTGTTAATATTTTCAAAAACTTATAAGGATCATATTGCTCACCTAGAATTATTTTTTAGAAAGGTTGAGCAAAATGGTTTAATCCTATCAAAAAAGAAGATGGAAATATGCAAAGAAAAAGTTAACTTCCTTGGACATGAAATAGGAGAAGGCAAAATTCATTTGCAAGAACATATTGCTAAGAAAATTTTACAATTTCCTGATGCT--------ATGAATGACAAAAAGAAATTACAGCAATTCCTAGGACTTGTAAATTATGCTAGAAATCACATCAACAATTTAGCAAAGCTAGCAGGACCTTTATACGCTAAATTAAGAAAAAATGGTCAGAAATATTTTAATTCTGAAGACATTAAATTAGTAAGATTAATAAAAGAAAAAGTGAAAGAACTAAAACCTCTAGAATTACCATTAGAAGAAAGTTACTTTATCATTGAAACCGATGCATCACAACAAGGTTGGGGTGCTATATTAAAGCAAAGACCTACTAAATTTTCC---GCTAAATCAGAAGAAAAAATATGTAGGTATGCTTCTGGAAGTTATAAATTAAAAACTGTCAATAATACAGATAGAGAGATCATGGCAATTATCAATGCAATTAATGCCTTTAGGTTATACCTAGGGTTTAAAGAATTCACGGTTAGAACCGATTGTGAAGCCATCTGTAGATACTATAACCAGCTTAATAGCAAGAAAAGCTCAACTAGAAGATGGATTTTATTTGAAGACATTATTACAGGAAATGGTTATAGAGTTATATTTGAACATATTAAGGGGAAAGATAATAGTTTACCTGACATGCTTTCTCGTTTACCCATATTTCAGGTATGAAAAGATCAATGAATTACGCCGGAGTCGAGTGCTTCACATTTGGAGATGACAACAAACTCAGAATATTCCCACCAAATTCATATAAATTTAAGCCAAAGGA-------CCATATAATCCTAGATGAAGTTCAAGAGTGCATCTTGGACAATTTCTGGTACCAATACAATAATAAAAGGGAAGAAAAAGGGTATATGTTATCAATATTGAATAGCCTCTCTGAATATTTTCACCTAATAAATGGGTCATTAATGCCTGCCAATGAAGATCATGAAGTAATCCAACAGAAGCCTATATATGTAGTATTTGATGGAAAGCTCCCTGGGGTCTACATTTCTTTTGAAGAAATTGTGGCTCAAAAAATAGATGCTAAATTAATGGGAGGAATATCTTGGAAGAAATATA-AGGATATTGATGAAGCATTAAGCCAAGCTAGAAAAATATTAGGAATAAATTATTATCTAGAGCCTGCTGCAAAAGAATATATTCAAAAATGCAAAAAAGCTAAAGGAAAGAAGACTTCAGA-----AATACCCATTAAGATGACTATAAAAGA--AGAAGGGTTTTT---TAAAAAACCCACATACAAG-----GAATGCTTAACAAAAGGAGTGGATCCATTAGATGGGGAATATATTGATTGGAAGATAAT------AGAAAAATT--TGAAGAAGCCTCCCC--------------------ACAATTAAAGAAGGAATTGAAGGAAGAAATACTTAAAGAATTAAAACAAGAAATGGATCAGAAATTCGAGCA-----AATAAAAAAGGCAGT---AGATGAGAAATTAGAAGTTTCTTTTTCTGATTTGGACACAATGGATCTTGGTGGCCATGGGCAACCAGATGAATAAATTAATATAAGCTAAATATGTTTTTCAATATATATTGATAATAGAATATCAACAATTTGGGCGTGGAAGAAGAATAAAAGAAATTCAGAAGATTACCCAAGAAAGAATCCAGAAGAAAGAATCCAGAAGGACACCCTATAAAGTATAAGGGGACAATATAGGGTGCGGTGAATGACATATCCCTGTGAAGAATAA
>chr04:18351200-18352248F
---------------------------------------------------------------------------------------------------------------------------------------------------------------------------------------------------------------------------------------------------------------------------------------------------------------------------------------------------------------------------------------------------------------------------------------------------------------------------------------------------------------------------------------------------------------------------------------------------------------------------------------------------------------------------------------------------------------------------------------------------------------------------------------------------------------------------------------------------------------------------------------------------------------------------------------------------------------------------------------------------------------------------------------------------------------------------------------------------------------------------------------------------------------------------------------------------------------------------------------------------------------------------------------------------------------------------------------------------------------------------------------------------------------------------------------------------------------------------------------------------------------------------------------------------------------------------------------------------------------------------------------------------------------------------------------------------------------------------------------------------------------------------------------------------------------------------------------------------------------------------------------------------------------------------------------------------------------------------------------------------------------------------------------------------------------------------------------------------------------------------------------------------------------------------------------------------------------------------------------------------------------------------------------------------------------------------------------------------------------------------------------------------------------------------------------------------------------------------------------------------------------------------------------------------------------------------------------------------------------------------------------------------------------------------------------------------------------------------------------------------------------------------------------------------------------------------------------------------------------------------------------------------------------------------------------------------------------------------------------------------------------------------------------------------------------------------------------------------------------------------------------------------------------------------------------------------------------------------------------------------------------------------------------------------------------------------------------------------------------------------------------------------------------------------------------------------------------------------------------------------------------------------------------------------------------------------------------------------------------------------------------------------------------------------------------------------------------------------------------------------------------------------------------------------------------------------------------------------------------------------------------------------------------------------------------------------------------------------------------------------------------------------------------------------------------------------------------------------------------------------------------------------------------------------------------------------------------------------------------------------------------------------------------------------------------------------------------------------------------------------------------------------------------------------------------------------------------------------------------------------------------------------------------------------------------------------------------------------------------------------------------------------------------------------------------------------------------------------------------------------------------------------------------------------------------------------------------------------------------------------------------------------------------------------------------------------------------------------------------------------------------------------------------------------------------------------------------------------------------------------------------------------------------------------------------------------------------------------------------------------------------------------------------------------------------------------------------------------------------------------------------------------------------------------------------------------------------------------------------------------------------------------------------------------------------------------------------------------------------------------------------------------------------------------------------------------------------------------------------------------------------------------------------------------------------------------------------------------------------------------------------------------------------------------------------------------------------------------------------------------------------------------------------------------------------------------------------------------------------------------------------------------------------------------------------------------------------------------------------------------------------------------------------------------------------------------------------------------------------------------------------------------------------------------------------------------------------------------------------------------------------------------------------------------------------------------------------------------------------------AATTGAAGGAAGAAATACTTAAAGAATTAAAACAAGAAATGGATCAGAAATTTGAGCA-----AATAAAAAAGGCAGT---AGATGAGAAATTAGAAGTTTCTTTTTCTGATTTGGACACAATAGATCTTGGTGGCCATGGGCAACCAGATGAATAAATTGATATAAGCTAAATTTGTTTTTCAATATATATTGATAATAGAATATCAACAATTTGGGCGTGGAAGAAGAATAAAAGATATTCAGAAGACTACAC--------------AAGAAGGAATCCAGAAGGACACCCTATAAAGTATAAGGGGACAATATAGGGTGTGGTGAATGACATATCCCTGTGAAGAATAA
>chr07:1720435-1721808F
----------------------------------------------------------------------------------------------------------------------------------------------------------------------------------------------------------------------------------------------------------------------------------------------------------------------------------------------------------------------------------------------------------------------------------------------------------------------------------------------------------------------------------------------------------------------------------------------------------------------------------------------------------------------------------------------------------------------------------------------------------------------------------------------------------------------------------------------------------------------------------------------------------------------------------------------------------------------------------------------------------------------------------------------------------------------------------------------------------------------------------------------------------------------------------------------------------------------------------------------------------------------------------------------------------------------------------------------------------------------------------------------------------------------------------------------------------------------------------------------------------------------------------------------------------------------------------------------------------------------------------------------------------------------------------------------------------------------------------------------------------------------------------------------------------------------------------------------------------------------------------------------------------------------------------------------------------------------------------------------------------------------------------------------------------------------------------------------------------------------------------------------------------------------------------------------------------------------------------------------------------------------------------------------------------------------------------------------------------------------------------------------------------------------------------------------------------------------------------------------------------------------------------------------------------------------------------------------------------------------------------------------------------------------------------------------------------------------------------------------------------------------------------------------------------------------------------------------------------------------------------------------------------------------------------------------------------------------------------------------------------------------------------------------------------------------------------------------------------------------------------------------------------------------------------------------------------------------------------------------------------------------------------------------------------------------------------------------------------------------------------------------------------------------------------------------------------------------------------------------------------------------------------------------------------------------------------------------------------------------------------------------------------------------------------------------------------------------------------------------------------------------------------------------------------------------------------------------------------------------------------------------------------------------------------------------------------------------------------------------------------------------------------------------------------------------------------------------------------------------------------------------------------------------------------------------------------------------------------------------------------------------------------------------------------------------------------------------------------------------------------------------------------------------------------------------------------------------------------------------------------------------------------------------------------------------------------------------------------------------------------------------------------------------------------------------------------------------------------------------------------------------------------------------------------------------------------------------------------------------------------------------------------------------------------------------------------------------------------------------------------------------------------------------------------------------------------------------------------------------------------------------------------------------------------------------------------------------------------------------------------------------------------------------------------------------------------------------------------------------------------------------------------------------------------------------------------------------------------------------------------------------------------------------------------------------------------------------------------------------------------------------------------------------------------------------------------------------------------------------------------------------------------------------------------------------------------------------------------------------------------------------------------------------------------------------------------------------------------------------------------------------------------------------------------------------------------------------------------------------------------------------------------------------------------------------------------------------------------------------------------------------------AGAAATATA-AGGATATTGATGAAGCATTAAGCCAAGCTAGAAAAATATTAGGAATAAATTATTATCTAGAGCCTGCTGCAAAAGAATATATTCAAAAATGCAAAAAAGCTAAAGGAAAGAAGACTTCAGA-----AATACCCATTAAGATGACTATAAAAGA--AGAAGGGTTTTT---TAAAAAACCCACATACAAG-----GAATGCTTAACAAAAGGAGTGGATCCATTAGATGGGGAATATATTGATTGGAAGATAAT------AGAAAAATT--TGAAGAAGCCTCCCC--------------------ACAATTAAAGAAGGAATTGAAGGAAGAAATACTTAAAGAATTAAAACAAGAAATGGATCAGAAATTTGAGCA-----AATAAAAAAGGCAGT---AGATGAGAAATTAGAAGTTTCTTTTTCTGATTTGGACACAATGGATCTTGGTGACCATGGGCAACCAGATGAATAAATTGATATAAGCTAAATATGTTTTTCAATATATATTGATAATAGAATATCAACAATTTGGGCGTGGAAGAAGAATAAAAGAAATTCAGAAGACTACCC--------------AAGAAAGAATCCAGAAGGACACCCTATAAAGTATAAGGGGACAATATAGGGTGCGGTGAATGACATATCCCTGTGAAGAATAA
>chr12:17892750-17895502F
-----------------------------------------------------------------------------------------------------------------------------------------------------------------------------------------------------------------------------------------------------------------------------------------------------------------------------------------------------------------------------------------------------------------------------------------------------------------------------------------------------------------------------------------------------------------------------------------------------------------------------------------------------------------------------------------------------------------------------------------------------------------------------------------------------------------------------------------------------------------------------------------------------------------------------------------------------------------------------------------------------------------------------------------------------------------------------------------------------------------------------------------------------------------------------------------------------------------------------------------------------------------------------------------------------------------------------------------------------------------------------------------------------------------------------------------------------------------------------------------------------------------------------------------------------------------------------------------------------------------------------------------------------------------------------------------------------------------------------------------------------------------------------------------------------------------------------------------------------------------------------------------------------------------------------------------------------------------------------------------------------------------------------------------------------------------------------------------------------------------------------------------------------------------------------------------------------------------------------------------------------------------------------------------------------------------------------------------------------------------------------------------------------------------------------------------------------------------------------------------------------------------------------------------------------------------------------------------------------------------------------------------------------------------------------------------------------------------------------------------------------------------------------------------------------------------------------------------------------------------------------------------------------------------------------------------------------------------------------------------------------------------------------------------------------------------------------------------------------------------------------------------------------------------------------------------------------------------------------------------------------------------------------------------------------------------------------------------------------------------------------------------------------------------------------------------------------------------------------------------------------------------------------------------------------------------------------------------------------------------------------------------------------------------------------------------------------------------------------------------------------------------------------------------------------------------------------------------------------------------------------------------------------------------------------------------------------------------------------------------------------------------------------------------------------------------------------------------------------------------------------------------------------------------------------------------------------------------------------------------------------------------------------------------------------------------------------------------------------------------------------------------------------------------------------------------------------------------------------------------------------------------------------------------------------------------------------------------------------------------------------------------------------------------------------------------------------------------------------------------------------------------------------------------------------------GAAGAGTCTATAGAATGGACTGCATTCACCTGTCCCCAGGGACACTATGAATGGCTAGTAATGCCACTAGGATTAAAAAATGCACCTGCCCTATTTCAAAGA-----------------AAAATGCAAAACATTTTTAGCGATAATCAAGAATTTGTGTTAGTATATATAGATGACTTGTTAATATTTTCAAAAACTTATAAGGATCATATTGCTCACCTAGAATTATTTTTTAGAAAGGTTGAGCAAAATGGTTTAATCCTATCAAAAAAGAAGATGGAGATATGCAAAGAAAAAGTTAACTTCCTTGGACATGAAATAGGAGAAGGCAAAATTCATTTGCAAGAACATATTGCTAAGAAAATTTTACAATTTCCTGATGCT--------ATGAATGACAAAAAGAAATTACAGCAATTCCTAGGACTTGTAAATTATGCTAGAAATCACATCAACAATTTAGCAAAGCTAGCAGGACCTTTATACGCTAAATTAAGAAAAAATGGTCAGAAATATTTTAATTCTGAAGACATTAAATTAGTAAGATTAATAAAAGAAAAAGTGAAAGAACTAAAACCTCTAGAATTACCATTAGAAGAAAGTTACTTTATCATTGAAACCGATGCATCACAACAAGGTTGGGGTGCTATATTAAAGCAAAGACCTACTAAATTTTCC---ACTAAATCAGAAGAAAAAATATGTAGGTATGCTTCTGGAAGTTATAAATTAAAAACTGTCAATAATACAGATAGAGAGATCATGGCAATTATCAATGCAATTAATGCCTTTAGGTTATACCTAGGGTTTAAAGAATTCACGGTTAGAACCGATTGTGAAGCCATCTGTAGATATTATAACCAGCTTAATAGCAAGAAAAGCTCAACTAGAAGATGGATTTTATTTGAAGATATTATTACAGGAAATGGTTATAGAGTTATATTTGAACATATTAAGGGGAAAGATAATAGTTTACCTGACATGCTTTCTCGTTTAACCATATTTCAGGTATGAAAAGATCAATGAATTACGCCGGAGTCGAGTGCTTCACATTTGGAGATGACAACAAACTCAGAATATTCCCACCAAATTCATATAAATTTAAGCCAAAGGA-------CCATATAATCCTAGATGAAGTTCAAGAGTGCATCTTGGATAATTTCTGGTACCAATACAATAATAAAAGGGAAGAAAAAGGGTATTTGTTATCAATATTGAATAGCCTCTCTGAATATTTTCACCTAATAAATGGGTCATTAATGCCTGCCAATGAAGATCATGAAGTAATCCAACAAAAGCCTATATATGTAGTATTTGATGGAAAGCTCCCTGGGGTCTACATTTCTTTTGAAGAAATTGTGGCTCAAAAAATAGATGCTAAATTAATGGGAGGAATATCTTGGAAGAAATATA-AGGATATTGATGAAGCATTAAGCCAAGCTAGAAAAATATTAGGAATAAATTATTATCTAGAGCCTGCTGCAAAAGAATATATTCAAAAATGCAAAAAAGCTAAAGGAAAGAAGACTTCAGA-----AATACCCATTAAGATGACTATAAAAGA--AGAAGGGTTTTT---TAAAAAACCCACATACAAG-----GAATGCTTAACAAAAGGAGTGGATCCATTAGATGGGGAATATATTGATTGGAAGATAAT------AGAAAAATT--TGAAGAAGCCTCCCC--------------------ACAGTTAAAGAAGGAATTGAAGGAAGAAATACTTAAAGAGTTAAAACAAGAAATAGATCAGAAATTTGAGCA-----AATAAAAAAGGCAGT---AGATGAGAAATTAGAAGTTTCTTTTTCTGATTTGGACACAATGGATCTTGGTGGCCATGGGCAACCAGATGAATAAATTAATATAAGCTAAATATGTTTTTCAATATATATTGATAATAGAATATCAACAATTTGGGCGTGGAAGAAGAATAAAAGAAATTCAGAAGATTACTC--------------AAGAAAGAATCTAGAAGGACACCCTATAAAGGATAAGGGGACAATATAAGGTGCGGTGAATGACATATCACTGTGAAGAATAA
>chr12:4594227-4599536F
---------------------------------------------------------------------------------------------------------------------------------------------------------------------------------------------------------------------------------------------------------------------------------------------------------------------------------------------------------------------------------------------------------------------------------------------------------------------------------------------------------------------------------------------------------------------------------------------------------------------------------------------------------------------------------------------------------------------------------------------------------------------------------------------------------------------------------------------------------------------------------------------------------------------------------------------------------------------------------------------------------------------------------------------------------------------------------------------------------------------------------------------------------------------------------------------------------------------------------------------------------------------------------------------------------------------------------------------------------------------------------------------------------------------------------------------------------------------------------------------------------------------------------------------------------------------------------------------------------------------------------------------------------------------------------------------------------------------------------------------------------------------------------------------------------------------------------------------------------------------------------------------------------------------------------------------------------------------------------------------------------------------------------------------------------------------------------------------------TTCAAAATCAAAAAAGTGATGGGGCTATACTAAATCTAGCAGCACATGATCCCATAGACTGGCCAAATATCATTAGTATTTGGAAGGGGTTAATAGTTCAAAAATACATACAAAATCAGCATAATATAGGGAATAAGGTGGAGGATATGATAACTTATTTAGAAACATTTTTGGGTGAATCTGCTAAAGTCCTATGGGAACAATGGGTTGAAAAGAATCCTAATAACTACGAAGAGCTAAAAAGAGCAGGAAGTAATCCTCACAACTTTGCAAATATAGTATCTAATATTATCATAGCTGAAGACCCAGAATTAGGATATACAACCCTGCAAAATGAAAGATTAAAAGAAATAGAAAAATTAACTTTAACAAGCTGGAAAGGTATAAAGGAATTTTCTCAACATTATCTATATAATGCAACAACTGCTAAGCAAGGATACAATAAGGGAATAGTTGAGCGATATTTTAATAAACTACCTGACCCATTAGGTAGTATGATTTTTGAGGAATATAAAAAGGAAACTGAAGGAGCTGAAATTAATATTTCCCAAGCCATAACCTTCGTGTTCAAACAATTAAGAAAAATATGCACAGGAATACAAGCCCAAAGGTCAATGAAACATTCTGATTATAATTTTTGCAATAAAATAATACAAATACCTTTATCATATGGAGAAGATAGGCCTAGAAATAAAAGAAACCATAGATATCAAAGTAGAAATAGCAATAATATAAAGACAAAGAAAAGGTACTTCTTAAGAAGATCAGATAATAGAGCACCATTCTTACATAAACGAAATGTAAGAAGATATAACCCAAAGAAAACTTATGATAAGACATGCAGATGTTTCATATGTAATTCACCAGATCATTTAAGTAGAACTTGCCCAAATAAAGATCAAAAAAGATATTCTAGTAAATATGAAGAACAAGAGAGAGTTTTAATTATAGATAGCGTAAATGAAAATATATTAGTATGTGATGATGAAATAAAAGATGACGAATCAATATATTCTATCATAGAAACAGATGAAATTGAAAACACCAATGAAGAGTATGAATCAACCGATGAAGAGTTAGATTTAATTGACGAACTAGCCGGTTTAAAAATAGAAATGATGGATCAGTTAAATTGTGAACATGATTGGATTAGAGGAAAAGGAGATTATAACATTAAATGTGCTTTTTGCATCTATTACCCAAGCCAAGATAATAGAGTAACCTGTAGTATATGCTTAAAACAAGCTTGTGCTGAATGTATAAAAGCAAATAAACAAAAATGGAGAAAAGAGATAGAATTAGAATCAGATGAAAGGATATTATCCAGTAGAGTACGAGTTTTAGAAAACAGAATAAATAAACTAGAAGTAGAA----AGAACCTAAAAATTAACTATGATATTAAGGCATTACCAGAAAATAAAGATATACAAAATACCGAATTTAAAGAACAAGTGATAACATTAAAAGACAGTAATACTGCTAAAATAATTCAACTAAAAGATGCCATAACTAATTTTGGAAATAAATATATAGTAAAATTGCCTTTCAAAGAAATTTTGGGAATAAGAATACCGGTAAAAGTAAAACTATCACCCAAGGTATCATATAAAATTCTAGCACTAGTAGACACTGGGTGTACAAAAAATATTATTCATGATAAGTACTTTATAAAATGTCCAGAGATAGTTCATACAATTGATGATAATAAGGCAGAAGTCTCTACAGACATGTCCGGAATAAAGAAAATTCATAATCAGTTAGCTCATAATGTTGAAGTATACATTAATGGAACTAAATATATAATAGATGAGATTACAATAAGAAACTTATCCATGATAAGTGATGACATGATAATTGGCCTAAGGTTTTTACAACAATCGGTACAAACCACAGTAATACATGAGCAGGGAATTACTTTTATTCCATATCAAAACAATGTGCCATATATCTCAGAGGTACGAAAGCGTGGTGGAGCCAGAAT---------------CAAACCCGACAACCTTGAAGCACTTAACCTTGAGTCTGAAGAAAGAATTAATGAATATGAACTTAGTGAGAATATAGACATCTATTATATATCAAATTCCAATATAGAGTGCATAGGATTACAAGCATTTGCACCAAATTGGTATAGGGATATTAAGTCTAAAAAGGATATAGAAAAAATTGTTCAAAGATTAGAGGATATTCAAATTATAGGAGAAATTCCTATGAAATATTGGGAGAAAAACGCTATCGAGTGTAAAATTAATATATTAAACCCAGAATATATTATTAAGACCAGCCCAATAGAAGCAACTCCGAAAGATATAGAAGAATTTAAGATGCATATAGAAGAACTGCTGAAACTAGGAGCAATAAGAGAGAGTAGAAGTCCACATAGGTCTGCAGCATTTATAGTAAGAAATCATGCGGAAGAAGTTAGAGGTAAATCTAGGATGGTCATAAATTATAAAAGGCTAAATGATAATACTATAGAAGATGCCTATAATATCCCAAATAAGCAAGAATGGATTAATAGGATACAAGGTAGCAAATATTTCTCGAAATTTGACTTAAAAGCTGGGTTTTGGCAAGTAAAAATGGCAGAAGAGTCTATAGAATGGACTGCATTCACCTGTCCCCAGGGACACTATGAATGGCTAGTGATGCCACTAGGATTAAAAAATGCACCTGCCCTATTTCAAAGA-----------------AAAATGCAAAACATTTTTAACGATAATCAAGAATTTGTGTTAGTATATATAGATGACTTGTTAATATTTTCAAAAACTTATAAGGATCATATTGCTCACCTAGAATTATTTTTTAGAAAGGTTGAGCAAAATGGTTTAATCCTATCAAAAAAGAAGATGGAAATATGCAAAGAAAAAGTTAACTTCCTTGGACATGAAATAGGAGAAGGCAAAATTCATTTGCAAGAACATATTGCTAAGAAAATTTTACAATTTCCTGATGCT--------ATGAATGACAAAAAGAAATTACAGCAATTCCTAGGACTTGTAAATTATGCTAGAAATCACATCAACAATTTAGCAAAGCTAGCAGGACCTTTATACGCTAAATTAAGAAAAAATGGTCAGAAATATTTTAATTCTGAAGACATTAAATTAGTAAGATTAATAAAAGAAAAAGTGAAAGAACTAAAACCTCTAGAATTACCATTAGAAGAAAGTTACTTTATCATTGAAACCGATGCATCACAACAAGGTTGGGGTGCTATATTAAAGCAAAGACCTACTAAATTTTCC---GCTAAATCAGAAGAAAAAATATGTAGGTATGCTTCTGGAAGTTATAAATTAAAAACTGTCAATAATACAGATAGAGAGATCATGGCAATTATCAATGCAATTAATGCCTTTAGGTTATACCTAGGGTTTAAAGAATTCACGGTTAGAACCGATTGTGAAGCCATCTGTAGATACTATAACCAGCTTAATAGCAAGAAAAGCTCAACTAGAAGATGGATTTTATTTGAAGATATTATTACAGGAAATGGTTATAGAGTTATATTTGAACATATTAAGGGGAAAGATAATAGTTTACCTGACATGCTTTCTCGTTTACCCTTATTTCAGGTATGAAAAGATCAATGAATTACGCCGGAGTCGAGTGCTTCACATTTGGAGATGACAACAAACTCAGAATATTCCCACCAAATTCATATAAATTTAAGCCAAAGGA-------CCATATAATCCTAGATGAAGTTCAAGAGTGCATCTTGGACAATTTCTAGTACCAATACAATAATAAAAGGGAAGAAAAAGGGTATATGTTATCAATATTGAATAGCCTCTCTGAATATTTTCACTTAATAAATGGGTCATTAATGCCTGCCAATGAAGATCATGAAGTAATCCAACAGAAGCCTATATATGTAGTATTTGATGGAAAGCTCCCTGGGGTCTACATTTCTTTTGAAGAAATTGTGGCTCAAAAAATAGATGCTAAATTAATGGGAGGAATATCTTGGAAGAAATATA-AGGATATTGATGAAGCATTAAGCCAAGCTAGAAAAATATTAGGAATAAATTATTATCTAGAGCCTGCTGCAAAAGAATATATTCAAAAATGCAAAAAAGCTAAAGGAAAGAAGACTTCAGA-----AATACCCATTAAGATGACTATAAAAGA--AGAAGGGTTTTT---TAAAAAACCCACATACAAG-----GAATGCTTAACAAAAGGAGTGGATCCATTAGATGGGGAATATATTGATTGGAAGATAAT------AGAAAAATT--TGAAGAAGCCTCCCC--------------------ACAATTAAAGAAGGAATTGAAGGAAGAAATACTTAAAGAATTAAAACAAGAAATTGATCAGAAATTTGAGCA-----AATAAAAAAGGCAGT---AGATGAGAAATTAGAAGTTTCTTTTTCTGATTTGGACACAATGGATCTTGGTGGCCATGGGCAACCAGATGAATAAATTAATATAAGCTAAATATGTTTTTCAATATATATTTATAATAGAATATCAACAATTTGGGCGTGGAAGAAGAATAAAAGAAATTCAGAAGATTACCC--------------AAGAAAGAATCCAGAAGGACACCCTATAAAGTATAAGGGGACAATATAGGGTGCGGTGAATGACATATTCCTGTGAAGAATAA
>chr06:10574839-10581762F
TGGTATCAGAGCCTGGTAATCATAGAGAAGCTAAATTTAGAAGCTAATATTGGAAAGTTAATAAATACCAAAGATAATATCAACATAAGGTGTAGATTAAGCCATACTGAAGAACACAGTTGGCACTCTAATAATAGCCATCTAAATTTAATTGTAGATTTAATATATAATTTCTATATAAATTGGGGTAAGAGACAAGAAGATTTAGAGCAAAAGTTAGAATATATATATAAAGAACAAAAGCAATTTGTAGAACAATATTCTTTTCTTAATAATAAGCTAAATACTACATTAGAATTATTAGAAGATTATAAGATAAGGCAAAATAAAATTTCACAGAATAGTGATTATATTAAAGAATTACTAGACAAAATCAACTCTAGTAAAGGTAAGGAAATAGTTTTGGCCTCATCTGGCATAGTCTCATCTTCACAAGCCATTAATTCTGAAAAATGGACATATCTAGGAGTCTCTTTAGAAGAATAGCAAGCAGAGATGATAACTGTTCTGATAAACAAAAAGGTAAATATGATGACATAGATGAGCTGAAAGATGTTGCACAAGTAGATAAGCAGCTCGAAAGATATCAACGAGATACTTTAAGGGCAATAAGACCTCAACAAGTATACTGCATGGGATTTTTTGAGAATAAGAATGGGCTATATAGAATATCTAGAGAAGTAGAATTAAGTGTTCTAACAAAACTAGTAGAATTAAAAATAGTAGCTAAAGAATTTGAAAATAGTTTAAAATATTCAGGATATAAGTATATTCACCAAGGTATGTACATAATAGGAATCAAAGGAATGACAAGAAAGAAATTAGGAGCTAAAGTGTTAATAACCTTATTAGATAAAAGATGGGACACAATAAACCAAGCATCTTTAGGCTATCTAGAAGGAGATATGAATGAAAATATGTTGATAACCTATATAGCGCCTGATTTAATGATGCCTGTAAATGAATTCATAGATAAAATGAGTTTTGGTTTTCAAACAAAAGGATACGAAGAGTTTAAGGGAACAAATTTATTAATAAGTATAGAATTTATAGGAAGATTGACTAATAGAAGTGCCTCCAAATACAAAATCAATGTAAATGATGTGATAGAAAAAATGCATTCTAAAGGAATAAAATTTATGAGCCCTTTAACAATAGACTCTGAAGAAAGAGCAGGAGAAAAATGGCCAATTAGTGAATTTATAAAAAATAAAACCTTGAGTCAGCCTGAAAACTTCATAAGTTACCAAGACAGCAAAGGGAATGTTAGTATTAGATTTACAAATTGTAAAACCAGAGCTTCGGATGATTTGGATGCAGAATCATCTGACAGAAATATTATAGATAACAGAAGACATAGTATATCTGAATTGATGGAAAAATTAGACCATGAAAGTGAAATAAAATATTATGAAGATAAATTAAGAGATATAGCAGATGAATATAATAACTCTATGAAAAGTGAGTGGCCTAAAATTAGAGACAAGGAACTTTATTTCTATAGAGAACTATCCAGGATCAAGAAACAAAAAAAAGAGAAAAGCTTGGCCATAGAAACCCCCAGAACCCAGGAAATTAAAATAGAACAAATAAAGTCAGAAGAACCAAGAGAAGAAATCCAAAAGTTTGATAAGGTATTAAGTGAGGAAGAGCAATGGGAAGTAAATGAGAAATTATTACTAGAGAGTTATGAAGAAGAAAACAACCTGATAGAGGAAATAGAGAATATAGAA---GAAGAAGATAATGCAGAACAATATAATGATTTTATAGACTCATTGGATGAGGTAGGTTTGCATAATCTAGATAATGCAATGGAAGCTATGGAAGTAGATTTGGGAACAGGAAAAAGGAAAAGATACGGAGAGGGTTCTGTAAAAAATGAAGGAGAAAGAGAAAGACCAGCCAGGGCAGCAGGAAGATGGCCCCCAGAAAAAGAAGAATATTCATATCATTATATCCCAGGACAGTATAGGCATATGGGCACTAAAAGAAGAGATTTTGAGAAACCAATAAAATTTCAAAATCAAAAAAGTGATGGGGCTATACTAAATCTAGCAGCACATGATCCCATAGACTGGCCAAATATCATTAGTATTTGGAAGGGGTTAATAGTTCAAAAATACATACAAAATCAGCATAATATAGGGAATAAGGTGGAGGATATGATAACTTATTTAGAAACATTTTTGGGTGAATCTGCTAAAGTCCTATGGGAACAATGGGTTGAAAAGAATCCTAATAACTACGAAGAGCTAAAAAGAGCAGGAAGTAATCCTCACAACTTTGCAAATATAGTATCTAATATTATCATAGCTGAAGACCCAGAATTAGGATATACAACCCTGCAAAATGAAAGATTAAAAGAAATAGAAAAATTAACTTTAACAAGCTGGAAAGGTATAAAGGAATTTTCTCAACATTATCTATATAATGCAACAACTGCTAAGCAAGGATACAATAAGGGAATAGTTGAGCGATATTTTAATAAACTACCTGACCCATTAGGTAGTATGATTTTTGAGGAATATAAAAAGGAAACTGAAGGAGCTGAAATTAATATTTCCCAAGCCATAACCTTCGTGTTCAAACAATTAAGAAAAATATGCACAGGAATACAAGCCCAAAGGTCAATGAAACATTCTGATTATAATTTTTGCAATAAAATAATACAAATACCTTTATCATATGGAGAAGATAGGCCTAGAAATAAAAGAAACCATAGATATCAAAGTAGAAATAGCAATAATATAAAGACAAAGAAAAGGTACTTCTTAAGAAGATCAGATAATAGAGCACCATTCTTACATAAACGAAATGTAAGAAGATATAACCCAAAGAAAACTTATGATAAGACATGCAGATGTTTCATATGTAATTCACCAGATCATTTAAGTAGAACTTGCCCAAATAAAGATCAAAAAAGATATTCTAGTAAATATGAAGAACAAGAGAGAGTTTTAATTATAGATAGCGTAAATGAAAATATATTAGTATGTGACGATGAAATAAAAGATGACGAATCAATATATTCTATCATAGAAACAGATGAAATTGAAAACACCATTGAAGAGTATGAATCAACCGATGAAGAGTTAGATTTAATTGACGAACTAACCGGTTTAAAAATAGAAATGATGGATCAGTTAAATTGTGAACATGATTGGATTAGAGGAAAAGGAGATTATAACATTAAATGTGCTTTTTGCATCTATTACCCAAGCCAAGATAATAGAGTAACCTGTAGTATATGCTTAAAACAAGCTTGTGCTGAATGTATAAAAGCAAATAAACAAAAATGGAGAAAAGAGATAGAATTAGAATCAGATGAAAGGATATTATCTAGTAGAGTACGAGTTTTAGAAAACAGAATAAATAAACTAGAAGTAGAACTAGAGAACCTAAAAATTAACTATGATATTAAGGCATTACCAGAAAATAAAGATATACAAAATACCGAATTTAAAGAGCAAGTGATAACATTAAAAGACAGTAATACTGCTAAAATAATTCAACTAAAAGATGCCATAACTAATTTTGGAAATAAATATATAGTAAAATTGCCTTTCAAAGAAATTTTGGGAATAAGAATACCGGTAAAAGTAAAACTATCACCCAAGGTATCATATAAAATTCTAGCACTAGTAGACACTGGGTGTACAAAAAATATTATTCATGATAAGTACTTTATAAAATGTCCAGAGATAGTTCATACAATTGATGATAATAAGGCAGAAGTCTCTACAGACATGTCCGGAATAAAGAAAATTCATAATCAGTTAGCTCATAATGTTGAAGTATACATTAATGGAACTAAATATATAATAGATGAGATTACAATAAGAAACTTATCTATGATAAGTGATGACATGATAATTGGCCTAAGGTTTTTACAACAATCGGTACAAACCACAGTAATACATGAGCAGGGAATTACTTTTATTCCATATCAAAACAATGTGCCATATATCTCAGAGGTACGAAAGCGTGGTGGAGCCAGAGCCAGAAT---------CAAACTCGACAACCTTGAAGCACTTAACCTTGAGTCTGAAGAAAGAATTAATGAATATGAACTTAGTGAGAATATAGACATCTATTATATATCAAATTCCAATATAGAGTGCATAGGATTACAAGCATTTGCACCAAATTGGTATAGGGATATTAAGTCTAAAAAGGATATAGAAAAAATTGTTCAAAGATTAGAGGATATTCAAATTATAGGAGAAATTCCTATGAAATATTGGGAGAAAAACGCTATCGAGTGTAAAATTAATATATTAAACCCAGAATATATTATTAAGACCAGCCCAATAGAAGCAACTCCGAAAGATATAGAAGAATTTAAGATGCATATAGAAGAACTGCTGAAACTAGGAGCAATAAGAGAGAGTAGAAGTCCACATAGGTCTGCAGCATTTATAGTAAGAAATCATGCGGAAGAAGTTAGAGGTAAATCTAGGATGGTCATAAATTATAAAAGGCTAAATGATAATACTATAGAAGATGCCTATAATATCCCAAATAAGCAAGAATGGATTAATAGGATACAAGGTAGCAAATATTTCTCGAAATTTGACTTAAAAGCTGGGTTTTGGCAAGTAAAAATGGCAGAAGAGTCTATAGAATGGACTGCATTCACCTGTCCCCAGGGACACTATGAATGGCTAGTGATGCCACTAGGATTAAAAAATGCACCTGCCCTATTTCAAAGA-----------------AAAATGCAAAACATTTTTAACGATAATCAAGAATTTGTGTTAGTATATATAGATGACTTGTTAATATTTTCAAAAACTTATANNNNNNNNNNNNNNNNNNNNNNNNNNNNNNNNNNNNNNNNNNNNNNNNNNNNNNNNNNNNNNNNNNNNNNNNNNNNNNNNNNNNNNNNNNNNNNNNNNNNNNNNNNNNNNNNNNNNNNNNNNNNNNNNNNNNNNNNNNNNNNNNNNNNNNNNNNNNNNNNNNNNNNNNNNNNNNNNNNNNNNNNNNNNNNNNNNNNNNNNNNNNNNNNNNNNNNNNNNNNNNNNNNNNNNNNNNNNNNNNNNNNNNNNNNNNNNNNNNNNNNNNNNNNNNNNNNNNNNNNNNNNNNNNNNNNNNNNNNNNNNNNNNNNNNNNNNNNNNNNNNNNNNNNNNNNNNNNNNNNNNNNNNNNNNNNNNNNNNNNNNNNNNNNNNNNNNNNNNNNNNNNNNNNNNNNNNNNNNNNNNNNNNNNNNNNNNNNNNNNNNNNNNNNNNNNNNNNNNNNNNNNNNNNNNNNNNNNNNNNNNNNNNNNNNNNNNNNNNNNNNNNNNNNNNNNNNNNNNNNNNNNNNNNNNNNNNNNNNNNNNNNNNNNNNN-------------------------------------------------------------------------------------------------------------------------------------------NNNNNNNNNNNNNNNNNNNNNNNNNNNNNNNNNNNNNNNNNNNNNNNNNNNNNNNNNNNNNNNNNNNNNNNNNNNNNNNNNNNNNNNNNNNNNNNNNNNNNNNNNNNNNNNNNNNNNNNNNNNNNNNNNNNNNNNNNNNNNNNNNNNNNNNNNNNNNNNNNNNNNNNNNNNNNNNNNNNNNNNNNNNNNNNNNNNNNNNNNNNNNNNNNNNNNNNNNNNNNNNNNNNNNNNNNNNNNNNNNNNNNNNNNNNNNNNNNNNNNNNNNNNNNNNNNNNNNNNNNNNNNNNNNNNNNNNNNNNNNNNNNNNNNNNNNNNNNNNNNNNNNNNNNNNNNNNNN--------------------------------------------------NNNNNNNNNNNNNNNNNNNNNNNNNNNNNNNNNNNNNNNNNNNNNNNNNNNNNNNNNNNNNNNNNNNNNNNNNNNNNNNNNNNNNNNNNNNNNNNNNNNNNNNNNNNNNNNNNNNNNNNNNNNNNNNNNNNN---------------------------------------------------------------------------------------------------------------------------------------------------------------------------------------------------------------------------------------------------------ATTAGATGGGGAATATATTGATTGGAAGATAAT------AGAAAAATT--TGAAGAAGCCTCCCC--------------------ACAATTAAAGAAGGAATTGAAGGAAGAAATACTTAAAGAATTAAAACAAGAAATTGATCAGAAATTTGAGCA-----AATAAAAAAGGCAGT---AGATGAGAAATTAGAAGTTTCTTTTTCTGATTTGGACACAATGGATCTTGGTGGCCATGGGCAACCAGATGAATAAATTAATATAAGCTAAATATGTTTTTCAATATATATTGATAATAGAATATCAACAATTTGGGCGTGGATGAATAATAAAAGAAATTCAGAAGATTACCC--------------AAGAAAGAATCCAGAAGGACACCCTATAAAGTATAAGGGGACAATATAGGGTGCGGTGAATGACATATCCCTGTGAAGAATAA
>chr04:18352380-18359597F
-------------------------------------------------------------------------ATAATATCAATATAAGGTGTAGATTAAGCCATACTGAAGAACATAGTTGGCACTCTAATAATAGCCAACTAAATTTAATTGTAGATTTAATATATAATTTCTATATAAATTGGGGTAAGAGACAGGAAGATTTAAAGCAAAAGTTTGAAGATATATATAAAGAACAAAAGCAATTTGTAGAACAATATTCTTTTCTTAGTAATAAGCTAAATACTACATTAGAATTATTAGAAGATTATAAGATAAGGCAAAATAAAATTTCACAAAATAGTGATTATATTAAAGAATTACTAGACAAAATCAACTCTAGTAAAAGTAAGGAAATAGTTTTGGCTTCATCCGGCATAGTCTCATCCTCACAAGCCATTAATTCTGAAAAATGGACATATCTAGGAGTCTCTTTAGAAGAATAGCAAGCAGAGATGATAACTGTTCTGATAAACAAAAAGGCAAATATGATGACATAGATGAGCTGAAAGATGTTGCACAAGTAGATAAGCAGCTCGAAAGATATCAACGAGATACTTTAAGGGCAATAAGACCTCAACAAGTATACTGCATGGGATTTTTTGAGAATAAGAATGGGCTATATAGAATATCTAGAGAAGTAGAATTAAGTGTTCTAACAAAACCAGTAGAATTAAAAATAGTAGCTAAAGAATTTGAAAATGGATTAAAATATTCATGATATAAGTATATTCACCAAGGTATGTACATAATAGGAATCAAAGGAATGACAAGAAAGAAATTAGGAGCTAAAGTTTTAATAACCTTATTAGATAAAAGATGGGACACAATAGACAGAACATCTTTAGGCTATCTAGAAGGAGATATGAATGAAAATATGTTGATAACCTATATAGCACCTGATTTAATGATGCCTGTAAAAGAATTCATAGATAAAATGAGTTTTGGTTTTCAAACAAAAGGATACGAAGAGTTTAAGGGAACAAATTTATTAATAAGTATAGAATTTATAGGAAGATTGACTAATAGAAGTGCCTCCAAATACAAAATCAATGTAAATGATGTGATAGAAAAAATGCATTCTAAAGGAATAAAATTCATGAGCCCTTTAACAATAGACTCTGAAGAAAGAGCAGGAGAAAAATGGCCAATTAGTAAATTTATAAAAAATAAAACCTTGAGTCAGCCTGAAAACTTCATAAGTTACCAAGATAGCAAAGGGAATGTTAGTATTAGATTTACAAATTATGAAACCAGAGCTTCGGATGATTTGGATACAGAATCATCTGACAGAAATATTATAGATAACAGAAGACATAGTATTTCTGAATTGATGGAAAAATTAGATTATGAAAGTGAAATAAAATATTATGAAGATAAATTAAGAGATATAGCAGATGAATATAATAACTCTATGAAAAGTGAGTGGCCTAAAATTAGAGACAAGGAACTTTACTTCTATAGAGAACTATCCAGGATTAAGAAACAAAAAAAAGAGAAAAGCTTGGCCATAGAAACCCCTAGAACCCAGGAAATTAAAATAGAACAAATAAAGTTGG------------AAGAAAACCAAAAGTTCGATAAGGTATTAAGTGAGGAAGAGCAATGGGAAGTAAATGAGAGATTATTACTAGAGAGTTATGAAGAAGAAAACAACCTGATAGAGGAAATAGAGAATATAGAA---GAAGAAGATAATGCAGAACAATATAATGATTTTATAGACTCATTGGATGAGGTAGGTTTGCATAATCTAGATAATGCAATGGAAGCCATGGAAGTAGATTTGGGAACAGGAAAAAGGAAAAGATACGGAGATGGTTTTGTAAAAAATGAAGGAGAAAGAGAAAGACCAGCCAGGGCAGCAGGAAGATGGCCTCCAGAAAAAGAAGAATATTCATATAATTATATCCCAGGACAGTATAGGCACATGGGCACTAAAAGAAGAGATTTTGAGAAACCAATAAAATTTCAAAATCAAAAAAGTGATGGGGCTATACTAAACCTAGCAGCACATGATCCCATAGACTGGCCAAATATCATTAGTATTTGGAAGGGGTTAATAGTTCAAAAATATATACAAAATCAGCATAATATAGGGAATAAGGTGGAGGATATGATAACTAATTTAGAAACATTTTTGGGTGAATCTGCTAAAGTCCTATGGGAACAATGGGTTGAAAAGAATCCTAATAACTACGAAGAGCTAAAAAGAGCAGGAAGTAATCCTCACAACTTTGCAAATATAGTATCTAATATTATCATAGCTGAAGACCTAGAATTAGGATATACAACCCTGCAAAATGAAAGATTAAAAGAAATAGAAAAACTAACATTAACAAGCTGGAAAGGTATAAAGGAATTTTCACAACATTATCTATATAATGCAACAACTGCTAAGCAAGGATACAATAAGGGAATAGTTGAGCGATATTTTAATAAACTACCTGACCCATTAGGAAGTATGATTTTTGAGGAATATAAAAAGGAAACTGAAGGAGCTGAAATTAATATTTCCCAAGCCATAACTTTCGTGTTCAAACAGTTAAGAAAAATATGCACAGGAATACAAGCCCAAAGGTCAATGAAACATTCTGATTATAATTTTTGCAATAAAAAAATACAAATACCTTTATCATATGGAGAAGAAAGGCCTAGAAATAAAAGAAACCATAGATATCAAAGAAGAAATAACAATAATATAAAGACAAAGAATAGGTACTTCTTAAGAAGATCAGATAATATAGCACCTTTCTTACATAAACGAAATGTAAGAAGATATAACCCAAAGAAAACTTATGATAAGACATGCAGATGTTTCATATGTAATTCACCAGATCATTTAAGTAGAACTTGCGCAAATAAAGATCAAAAAAGATATTCTAGTAAATATGAAGAACAAGAGAGAGTTTTAATTATAGATAGCGTAAATGAAAATATATTAGTTTGTGATGATGAAATAAAAGATGACGAATCAATATATTCTATCATAGAAACAGATGAAATTGAAAACACCAATGAAGAGTATGAATCAACCGATGAAGAGTTAGATTTAATTGACGAACTAGCAGGTTTAAAAATAGAAATGATGGATCAGTTAAATTGTGAACATGATTGGATTAGAGGGAAATGAGATTATAACATTAAATGTGCTTTTTGCATCTATTACCCAAGCCAAGATAATAGAGTAACCTGTAATATATGCCTAAAACAAGCTTGTGCTGAATGTATAAAAGCAAATAAACAAAAATGGAGAAAAGAGATAGAATTAGAATCAGATGAAAGGATATTATCTAGTAGAGTACAAGTTTTAGAAAACAGAATAAATAAACTAGAAGTAGAACTAGAGAACCTAAAAATTAACTATGATATTAAGGCATTACCAGAAAATAAGGATATACAAAATACCGAATTTAAAGAGCAAGTGATAACATTAAAAGACAGTAATACTGCTAAAATAATTCAACTAAAAGATGCCATAACTAATTTTGGAAATAAATATATAGTAAAATTGCCTTTCAAAGAAATTTTGGGAGTAAGAATACCGGTAAAGGTAAAATTATCACCCAAGGTATCATATAAAATTTTAGCACTAGTAGACACTGGGTGTACAAAAAATATTATTCATGATAAGTACTTCATAAAATGTCCAGAGATAGTTCATACAATTGATGATAATATGGCAGAAGTCTCTACAGACATGTCCGGAATAAAGAAAATTCATAATCAGTTAGCTTATAATGTTGAAGTATACATTAACGGAACTAAATATATAATAGATGAGATTACAATAAGAAACTTATCCATGATAAGTGATGACATGATAATTGGCCTAAGGTTTTTACAACAATCGGTACAAACCACAGTAATACATGAGCTAGGAATTACTTTTATCCCATATCAAAACAATGTGCCATATATCTCAGAGGTACGAAAGCGTGGTGGAGCCAGAAT---------------CAAACCCGACAACCTTGAAGCACTCAACCTTGAGTGTGAAGAAAGAATTAATGAATATGAACTTAGTGAGAATATAGACATCTATTATATATCAAATTCCAATATAGAGTGCATAGGATTACAAGCATTTGCACCAAATTGGTATAGGGATATTAAGTCTAAAAAGGATATAGAAAAAATCGTTCAAAGATTAGAGGATATCCAAATTATAGGAGAAATTCCTATGAAATATTGGGAGAAAAACGCTATCGAGTGTAAAATTAATATAATAAACCCAGAATATATTATTAAGACTAGCCCAATAGAAGCAACTCTGAAAGATATAGAAGAATTTTAGATGCATATAGAAGAACTACTGAAACTAGGAGCAATAAGAGAGAGTAGAAGTCCACATAGGTCTGCAGCATTTATAGTAAGAAATCATGCGGAAGAAGTTAGAGGTAAATCTAGGATGGTCATAAATTATAAAAGGCTAAATGATAATACTATAGAAGATGCCTATAATATCCCAAATAAGCAAGAATGGATTAATAGGATACAAGGTAGCAAATATTTCTTGAAATTTGACTTAAAAGCTGGATTTTGGCAAGTAAAAATGGCAGAAGAGTCTATAGAATGGACTGCATTCACCTGTCCCCAGGGACACTATGAATGGCTTGTGATGCCACTAGGATTAAAAAATGCACCTGCCCTATTTCAAAGA-----------------AAAATGCAAAACATTTTTAACGATAATCAAGAATTTGTGTTAGTATATATAGATGAGTTGTTAATATTTTCAAAAACTTATAAGGATCATATTGCTCACCTAGAATTATTTTTTAGAAAGGTTGAGCAAAATGGTTTAATCCTATCAAAAAAGAAGATGGAGAGATGCAAAGAAAAAATTAACTTCCTTGGACATAAAATAGGAGAAGGCAAAATTCATTTGCAAGAACATATTGCTAAGAAAATTTTACAATTTCCTGATGCT--------ATGAATGATAAAAAGAAATTACAGCAATTCTTAGGACTTGTAAATTATGCTAGAAATCACATCAACAATTTAGCAAAGCTAGCAGGACCTTTATACGCTAAATTAAGAAAAAATGGTCAGAAATATTTTAATTCTGAAGACATTAAATTAGTGAGATTAATAAAAGAAAAAGTGAAAGAACTAAAACCTCTAGAATTACCATTAGATGAAAGTTACTTTATCATTGAAACCGATGCATCACAACAAGGTTGGGGTGCTATATTAAAGCAAAGACCTACTAAATTTTCC---GCTAAATCAGAAGAAAAAATATGTAGGTATGCTTCTGGAAGTTATAAAGTAAAAACTGTCAATAATACAAATAGAGAGATCATGGCAATTATCAATGCAATCAATGCCTTTAGGTTATACCTAGGGTTTAAAGAATTCACGGTTAGAACCGATTGTGAAGCCATCTGTAGGTACTATAACCAGCTTAATAGCAAGAAAAGCTCAACTAGAAGATGGATTTTATTTGAAGACATTATTACAGGAAATGGTTATAGAGTTATATTTGAACATATTAAGGGGAAAGATAATAGTTTACCTGACATGCTTTCTCGTTTACCCATATTTCAGGTATGAAAAGATCAATGAATTACGCCGGAGTCGAGTGCTTCACATTTGGAGATGACAACAAACTCAGAATATTCCCACCAAATTCATATAAATTTAAGCCAAAGGA-------CCATATAATCCTAGATGAAGTTCAAGAGTGCATCTTGGATAATTTTTGGTACCAATACAATAATAAAAGGGAAGAAAAAGGGTATATGTTATCAATATTGAATAGCCTCTCTGAATATTTTCACCTAATAAATGGGTTATTAATGCCTGCCAATGAAGATCATGAAGTAATCCAACAGAAGCCTATATATGTAGTATTTGATGGAAAGCTCCCTGGGGTCTACATTTCTTTTGAAGAAATTGTGGCTCAAAAAATAGATGCTAAATTAATGGGAGGAATATCTTGGAAGAAATATA-AGGATATTGATGAAGCATTAAGCCAAGCTAGAAAAATATTAGGAATAAATTATTATCTAGAGCCTGCTGCAAAAGAATATATTCAAAAATGCAAAAAAGCTAAAGGAAAAAAGACCCCAGA-----AATACCCATTAAGATGACTATAAAAGA--AGAAGGGTTTTT---TAAAAAACCCACAAACAAG-----GAATGCTTAACAAAAGGAGTGGATCCATTAGATGGGGAATATATTGATTGGAAGATAAT------AGAAAAATT--TGAAGAAGCCTCCCC--------------------ACAATTAAAGAAGGAATTGAAGGAAGAGATACTTAAAGAATTAAAACAAGAAATGGATCAGAAATTGGAGCA-----AATAAAAAAGGTAGA---AGATGAGAAATTAGAAGTTTCTTTTTCTGATTTGGACACAATGGATCTTGGTGGCCATGGGCAACCAGATGAAGAAATTGATATAAGCTAAATATGTTTTTCAATATACATTGATAATAGAATATCAG-AATTTGGGCGTGGAAGAAGAATAAAAGACATTCAGAAGACTACAC--------------AAGAAGGAATCCAGAAGGACACCCTATAAAG--TAAGGGGACAATATAGGGTGCGGTGAATGACATATCCCTGTGAAGAATAA
>chr06:12622778-12630091F
TGGTATCAGAGCCTAGTAATCATAGAGAAGCTAAATTTAGAAGCTAATATTGGAAAGTTAATAAATACCAAAGATAATATCAATATAAGGTGTAGATTAAGCCATACTGAAGAACATAGTTGGCACTCTAATAATAGCCAACTAAATTTAATTGTAGATTTAATATATAATTTCTATATAAATTGGGGTAAGAGACAGGAAGATTTAGAGCAAAAGTTAGAAGATATATATAAAGAACAAAAGCAATTTGTAGAACAATATTCTTTTCTTAATAATAAGCTAAATACTACATTAGAATTATTAGAAGATTATAAGATAAGGCAAAATAAAATTTCACAGAATAGTGATTATATTAAAGAATTACTAGACAAAATCAACTCTAGTAAAGGTAAGGAAATAGTTTTGGCTTCATCCGGCATAGTCTCATCTTCACAAGCCATTAATTCTGAAAAATGGACATATTTAGGAGTCTCTTTAGAAGAATAGCAAGCAGAGATGATAACTGTTCTGATAAACAAAAAGGCAAATATGATGACATAGATGAGCTGAAAGATGTTGCACAAGTAGATAAACAGCTCGAAAGATATCAACGAGATACTTTAAGGGCAATAAGACCTCAACAAGTATACTGCATGGGATTTTTTGAGAATAAGAATGGGCTATATAGAATATCTAGAGAAGTAGAATTAAGTGTTCTAACAAAACCAGTAGAATTAAAAATAGTAGCTAAAGAATTTGAAAATAGTTTAAAATATTCAGGATATAAGTATATTCACCAAGGTATGTACATAATAGGAATCAAAGGAATGACAAGAAAGAAATTAGGAGCTAAAGTGTTAATAACCTTATTAGATAAAAGATGGGACACAATAAACAAAGCATCTTTAGGCTATCTAGAAGGAGATATGAATGAAAATATGTTGATAACCTATATAGCGCCTGATTTAATGATGCCTGTAAATGAATTCATAGATAAAATGAGTTTTGGTTT-CAAACAAAAGGATACGAAGAGTTTAAAGGAACAAATTTATTAATAAGTATAGAATTTATAGGAAGATTGACTAATAGAAGTGCCACCAAATACAAAATCAATGTAAATGATGTGATAGAAAAAATGCATTCTAAAGGAATAAAATTCATGAGCCCTTTAACAATAGACACTGAAGAAAGAGCAGGAGAAAAATGGCCAATTAGTGAATTTATAAAAAATAAAACCTTGAGTCAGCCTGAAAACTTCATAAGTTACCAAGATAGCAAAGGGAATGTTAGTATTAGATTTACAAATTATAAAACCAGAGCTTCGGATGATTTGGATGCAGAATCAACTGACAGAAATATTATAGATAATAGAAGACATAGTATTTCTGAATTGATGGAAAAATTAGACCATGAAAGTGAAATAAAATATTATGAAGATAAATTAAGAGATATAGCAGATGAATATAATAACTCTATGAAAAGTGAGTGGCCTAAAATTAGAGACAAGGAACTTTATTTCTATAGAGAACTATCCAGGATTAAGAAACAAAAAAAAGAGAAAAGCTTGGCCATAGAAACCCCCAGAACCCAGGAAATTAAAATAGAACAAATAAAGTCAAAAGAACCAAGAGAAGAAATCCAAAAGTTTGATAAGGTATTAAGTGAGGAAGAGCAATGGGAAGTAAATGAGAAATTATTACTAGAGAGTTATGAAGAAGAAAACAACCTGATAGAGGAAATAGAGAATATAGAA---GAAGAAGATAATGCAGAACAATATAATGATTTTATAGACTCATTGGATGAGGTAGGTTTGCATAATCTAGATAATGCAATGGAAGCCATGAAAGTAGATTTGGGAACAGGAAAAAGGAAAAGATACGGAGAGGGTTCTGTACAAAATGAAGGAGAAAGAAAAAGACCAGCCAGGGCAGCAGGAAGATGGCCTCCAGAAAAAGAAGAATATTCATATCATTATATCCCAGGACAGTATAGGCACATGGGTACTAAAAGAAGAGATTTTGAGAAATCAATAAAATTTCAAAATCAAAAAAGTGATGGGGCTATACTAAATCTAGCAGCACATGATCCCATAGACTGGCCAAATATCATTAGTTTTTGGAAGGGGTTAATAGTTCAAAAATATATACAAAATCAGCATAATATAGGGAATAATGTGGGGGATATGATAACTTATTTAGAAACATTTTTGGGTGAATCTGCTAAAGTCCTATGGGAACAATGGGTTGAAAAGAATCCTAATAACTACGAAGAGCTAAAAAGAGCAGGAAGTAATCCTCACAACTTTGCAAATATAGTATCTAATATTATCATAGCTGAAGACCCAGAATTAGGATATACAACCCTGCAAAATGAAAGATTAAAAGAAATAGAAAAATTAACCTTAACAAGCTAGAAAGGTATAAAGGAATTTTCTCAACATTATCTATATAATGCAACAACTGATAAGCAAGGATACAATAAGGGAATAGTTGAGCGATATTTTAATAAACTACCTGACCCATTAGGTAGTATGATTTTTGAGGAATATAAAAAGGAAACTGAAGGAGCTGAAATTAATATTTCCCAAGCCATAACCTTTGTGTTCAAACAATTAAGAAAAATATGCACAGGAATACAAGCCCAAAGGTCAATGAAACATTCTGATTATAATTTTTGCAATAAAATAATACAAATACCTTTATCATATGGAGAAGATAGGCCTAGAAATAAAAGAAACCATAGATATCAAAGTAGAAATAACAATAATATAAAGACAAAGAAAAGGTACTTCTTAAGAAGATCAGATAATAGAGCACCTTTCTTACATAAATGAAATGTAAGAAGATATAACCCAAAGAAAACTTATGATAAGACATGCAGATGTTTCATATGTAATTCTCCAGATCATTTAAGTAGAACTTGCCCAAATAAAGATCAAAAAAGATATTCTAGTAAATATGAAGAACAAGAGAGAGTTTTAATTATAGATAGCGTAAATGAAAATATATTAGTATGTGATGATGAAATAAAAGATGACGAATCAATATATTCTATCATAGAAACAGATGAAATTGAAAACACCAATGAAGAGTATGAATCAACCAATGAAGAGTTAGATTTAATTGACGAACTAGCCGGTTTAAAAATAGAAACGATGGATTAGTTAAATTGTGAACATGATTGGATTAGAGGAAAAGGAGATTATAACATTAAATGTGCTTTTTGCATCTATTACCCAAGCCAAGATAATAGAGTAACCTGTAGTATATGCTTAAAACAAGCTTGTGTTGAATGTATAAAAGCAAATAAACAAAAATGGAGAAAAGAGATAGAATTAGAATCAGATGAAAGGATATTATCTAGTAGAGTACGAGTTTTAGAAAACAGAATAAATAAACTAGAAGTAGAACTAGAGAACCTAAAAATTAACTATGATATTAAGGCATTACCAGAAAATAAGGATATACAAAATACCGAATTTAAAGAGCAAGTGATAACATTAAAAGACAGTAATACTGCTAAAATAATTCAACTAAAAGATGCCATAACTAATTTTGGAAATAAATATATAGTAAAATTGCCTTTCAAAGAAATTTTGGGAATAAGAATACCGGTAAAAGTAAAACTATCACCGAAGGTATTATATAAAATTCTAGCACTAGTAGACACTGGGTGTATAAAAAATATTATTCATGATAAGTACTTCATAAAATGTTCAGAGATAGTTCATACAATTGATGATAATAAGGCAGAAGTCTCTACAGACATGTCCGGAATAAAGAAAATTCATAATCAGTTAGCTCGTAATATTGAAGTATACATTAATGGAACTAAATATATAATAGATGAGATTACAATAAGAAACTTATCCATGATAAGTGATGACATGATAATTGGCCTAAGGTTTTTACAATAATCAGTACAAACCACAGTAATACATGAGCAGGGAATTACTTTTATCCCATATCAAAACAATGTGCCATATATCTCAGAGGTACGAAAGCGTGGTGGAGCCAGAAT---------------CAAACCTGACAACCTTGAAGCACTCAACCTTGAGTCTGAAGAAAGAATTAATGAATATGAACTTAGTGAGAATATAGACATCTATTATATATCAAATTCCAATATAGAGTGCATAGGATTACAAGCATTTGCACCAAATTGGTATAGGGATATTAAGTCTAAAAAGGATATAGAAAAAATTGTTCAAAGATTAGAGGATATCCAAATTATAGGAGAAATTCCTATGAAATATTGGGAGAAAAACGCTATCGAGTGTAAAATTAATATAATAAACCCAGAATATATTATTAAGACCAGCCCAATAGAAGCAACTCCGAAAGATATAGAAGAATTTAAGATGCATATAGAAGAACTGCTGAAACTAGGAGCAATAAGAGAGAGTAGAAGTCCACATAGGTCTGCAGCATTTATAGTAAGAAATCATGCGGAAGAAGTTAGAGGTAAATCTAGGATGGTCATAAATTATAAAAGGCTAAATGATAATACTATAGAAGATGCCTATAATATCCCAAATAAGCAAGAATGGATTAATAGGATACAAGGTAGCAAATATTTCTCGAAATTTGACTTAAAAGCTGGATTTTGGCAAGTAAAAATGGCAGAAGAGTCTATAGAATGGATTGCATTCACCTGTCCCCAGGGACACTATGAATGGCTAGTGATGCCACTAGGATTAAAAAATGCACCTGCCCTATTTCAAAGA-----------------AAAATGCAAAACATTTTTAACGATAATCAAGAATTTGTGTTAGTATATATAGATGACTTGTTAATATTTTCAAAAACTTATAAGGATCATATTGCTCACCTAGAATTATTTTTTAGAAAGGTTGAGCAAAATGGTTTAATCCTATCAAAAAAGAAGATGGAGATATGCAAAGAAAAAGTTAACTTCCTTGGACATGAAATAGGAGAAGGCAAAATTCATTTGCAAGAACATATTGCTAAGAAAATTTTACAATTTCCTGATGCT--------ATGAACGACAAAAAGAAATTACAGCAATTCCTAGGACTTGTAAATTATGCTAGAAATCACATCAACAATTTAGCAAAGCTAGCAGGACCTTTATACGCTAAATTAAGAAAAAATGGTCAGAAATATTTTAATTCTGAAGACATTAAATTAGTAAGATTAATAAAAGAAAAAGTGAAAGAACTAAAACCTCTAGAATTACCATTAGAAGAAAGTTATTTTATCATTGAAACCGATGCATCACAACAAGGTTGGGGTGCTATATTAAAGCAAAGACCTACTAAATTTTCC---GCTAAATCAGAAGAAAAAATATGTAGGTATGCTTCTGGAAGTTATAAATTAAAAACTGTCAATAATACAGATAGAGAGATCATGGCAATTATCAATGCAATCAATGCCTTTAGGTTATACCTAGGGTTTAAAGAATTCACGGTTAGAACCGATTGTGAAGCCATCTGTAGATACTATAACCAGCTTAATAGCAAGAAAAGCTCAACTAGAAGATGGATTTTATTTGAAGATATTATTACAGGAAATGGTTATAGAGTTATATTTGAACATATTAAGGGGAAAGATAATAGTTTACCTGACATGCTTTCTCGTTTACCCATATTTCAGGTATGAAAAGATCAATGAATTACGCCGGAGTCGAGTGCTTCACATTTGGAGATGACAACAAACTTAGAATATTCCCACCAAATTCATATAAATTTAAGCCAAAGGA-------CCATATAATCCTAGATGAAGTTCAAGAGTGCATCTTGGATAATTTCTGGTACCAATACAATAATAAAAGGGAAGAAAAAGGGTATATGTTATCAATATTGAATAGCCTCTCTGAATATTTTCACCTAATAAATGGGTCATTAATGCCTACCAATGAAGATCATGAAGTAATCCAACAGAAGCCTATATATGTAGTATTTGATGGAAAGCTCCCTGGGGTCTACATTTCTTTTGAAGAAATTGTGGCTCAAAAAATAGATGCTAAATTAATGGGAGGAATATCTTGGAAGAAATATA-AGGATATTGATGAAGCATTAAGCCAAGCTAGAAAAATATTAGGAATAAATTATTATCTAGAGCCTGCTGCAAAAGAATATATTCAAAAATGCAAAAAAGCTAAAGGAAAGAAGACTTCAGA-----AATACCCATTAAGATGACTATAAAAGA--AGAAGGGTTTTT---TAAAAAACCCACATACAAG-----GAATGCTTAACAAAAGGAGTGGATCCATTAGATGGGGAATATATTGATTGGAAGATAAT------AGAAAAATT--TAAAGAAGCCTCCCC--------------------ACAATTAAAGAAGGAATTGAAGGAAGAAATACTTAAAGAATTAAAACAAGAAATGGATCAGAAATTTGAGCA-----AATAAAAAAGGTAGT---AGATGAGAAATTAGAAGTTTCTTTTTCTGATTTGGACACAATGGATCTTGGTGGCCATGGGCAACCAGATAAATAAATTGATATAAGCTAAATATGTTTTTCAATATATATTGATAATAGAATATCAACAATTTAGGCGTGGAAGAAGAATAAAAGAAATTCAGAAGACTACCC--------------AAGAAAGAATCCAGAAGGACACCCTATAAAGTATAAGGGGACAATATAAGGTGCGGTGAATGACATATCCCTGTGAAGAATAA

#for S7 Fig. (eRTBVL2 related to eRTBVL-A2)
>chr08:11236546-11243393R
TGGTATCAGAGCC-AGTCATCATAGAGAAATCAAATTCAGAAGCTAATATTGGAAAGGTAATTACTACCAAAGATAATTTGAATATAAGGTGTAGGCTTAATCACATTGAAGACCATAGTTGGCACTCTAACAATAGTCAATTAAATTTAATTGTTGATCTGATATATAATTTTTATATAAATTGGGATAAAAAGCAGGAAGATTTAGAGCAAAGGATTGAAGATTTGTTTAAAGAACGAAAGCAATCTGAAGAACTATATTTGCTTGTCAGTAATAAATTAAATTCAGTGCTAAAAGAGCTAGAGGAATATAAGACAAGGCAGAATAAAATATTACAAAACAGTGACTATATCAAAGAGTTATTAGAAATAATAAATTCTAGTAAAGGAAAAGAGATAGTTTTGGCTTCAACAGGCATAATTACCTCGTCTCAAGCTATTAATTCAGAAAAATGGACCTATCTAGGAGTTTGTTTAGAAGAATAGCAAGCAGAGACGATAATGGTATTGTTAAACAAAAAGGTAAAAATGAAGACATAGATGAGCTTGAAGATATTGCAGAAGTAGACAAACAGCTCGAAAGATATCAAAGAGATACTTTGAGGGCAATAAGACCTCAACAAATATATTGCATGGGATTTTTTGAGAATAAAAATGGGTTATACAGAATATCTAGAGAAGTAGAGTTAAGCGTTTTAACAAAGCCAGTTGAGTTAAAAATTGTAGCCAAGGAATTTGAAAATGGATTAAAGTATTCAGGGTATAAATATATTCACCAAGGTATGTATATAATAGGAATCAAAGGTATGACAAGAAAGAAATTAGGAGCTAAAGTTCTAATAACTCTGTTAGATAAAAGGTGGGACACAATAGATAAAGCAGCATTAGGATTTTTAGAAGGAGACATGAATGAGAATATGTTGATAACATATATAGCCCCAGATCTAATGATGCCTATAAAAGAATTTATAGATAAAATGAGTTTTGGTTTTCAAACAAAGGGATACGAAGAATTTAAAGGAACAAATTTGCTAGTAAGCATAGAATTTATAGGAAGATTAACTAATAGAAGTGCCTCCAAATACAAAATAAATGTAAATGACGTGATTGAAAATATGCACTCTAAGGGAATAACTTTCATGAGCCCTCTAAAAATAAGTTCTGAAGAAAGGGCAGGAGAAGAATGGAAAATTAGTGATTTAATTGAAAGCAAAACTTTGAGTCAGCCTGAAAATTTTATAAGTTATCAAAACAGTAAAGGAAATACAAGCATTAGATTTATAAATTACAAACCCAGAACCACAGATGACTTAGAAACAGAAGCATCTGATAGAAATATAATAGATAATAGAAGACATAGTGTTTCAGAGTTTATGGAAAAATTAGATCAAGAAAGTGAGATAAAATATTACGAAAATAAATTAAAGGAAATAAATGAAGAATATAATAACTCTATGAAGTGTGAGTGGCCTAAAATAAGAGATAAAGAACTTTATTTCTATAGAGAATTAGCTAGAGTAAAGAAAGTAAAGAAGAACGAAGATATGGCAGTAGAAATTTTTAAAAACCA---------------------AGAGCAAGATAAGCATGACAAAGAAGAGCAAAATCTTGGTAAAATTTTAAGTGAAGAAGAGCAATGGGCAGAGAATGAAAGATTATTTCTTGAAAGTTATGAAGAAGAAATTAATCTAATAAATGAGATGGAGAATATAGAAAATGAAATAGACAATACAGAACAATATAATGA-TTTATAAACACATTAGATGAAGTAGGGTTACATAATCTTGATAATGCAATGGAAGCTATGGAAGTGGACTTAGGAACAGGAAAGAGAAAAAGATATGGAGAAGGTACTGTGAAAAACGAAGGAGAAAGAGAAAGACCAGCTAGGGCAGCAGGAAAATGGCCCCCTGATAGAGAAGAATTTTCATATAACTATATACCAGGTCAATATAGGCATATGGGTACAAAGAGAAGAGACTTTGAGAAGCCTGTTAAATTTCAAAACCAGAGGAGTGATGGTGCTATATTAAATTTAGCCGCACATGACCCTATTGATTGGCCTAATATTATTAGTATTTGGAAAGGTTTAATAGTTCAAAAATATATTCAAAACCGGCACAATATAGGAAGTAAAGTTGAAGATATGATAACCTACTTAGAAACATTCTTAGGTGAATCTGCTAAGATTCTATGGGAACAATGGGTTGAAAAGAATCCTAATAATTATGAAGAATTGAAAAGAGCTGGTAGCAATCCGCATAATTTTGCAAATGTTATATCTAACATTATTATAGCTGAAGATCCGGAATTAGGTTATACAACTTTGCAAAATGAAAGGTTAAAAGAAATAGAAAAATTAACGTTAACAAGTTGGAAAGGCATAAAAGAATTCTCCCAACATTATTTATATAATGCTACAACTGCTAAGCAAGGATACAATAAGGGAATAGTTGAGCGATATTTTAATAAACTACCTGACCCATTAGGTAGTATGATTTTTGAGGAATATAAAAAGGAAACTGAAGGAGCTGAAATTAATATTTCCCAAGCCATAACCTTCGTGTTCAAACAATTAAGAAAAATATGCACAGGAATACAAGCCCAAAGGTCTATGAAACACTCGGATTACAATTTCTGCAATAAAATAGTTCAAATACCCTTGTCATATGGAGAAGACAAGCCTAGAAGTAAAAGGATTTATAAACATCAAAATAGAAACCATAATAATATTAGAACAAAGAAAAGGTATTTCTTAAGAAGATCAGATAATAGAGCACCCTTCTTACATAAAAGAAATGTAAGAAGATATAATCCAAAGAAAACCTATGACAAAACATGCAGATGTTTTATATGCAACTCGCCAGATCATTTAAGTAGAACATGCCCAAATAAAGATCAAAAGAGATATTCTAGTAAATATGAAGAACAAGAGAGGGTTCTAATTATAGATAGCGTAAATGAAAATATATTAGTATGTGATGATGAAATAAAAGATGACGAGTCAATATATTCTATCATAGAAACAGACGAAGTTGAAACCATCAACGAAGAATATGAATCATCCGATGAAGAGTTAGATTTAATTGACGAATTAGCAGGTTTAAAGGTTGAAATGATGGATCAATTAAATTGTGAACATGATTGGATTAAAGGAAAGGGTGACTATAATATCAAATGTGCTTTTTGCATATATTATCCAAGTCAAGAAAATAGAGTGACTTGTAGTATATGTCTAAAACAAGCTTGTGCTGAATGTATAAAAGCAAATAAACAAAAATGGAGAAAAGAAATAGAATTAGAATCAGATGAAAAGACTTTATCTAGTAGAGTACGAGTGTTAGAAAATAGACTAAATAAACTAGAAGTAGAATTAGAGAACCTAAAAAATAATTGCGATATTAAGGCACTACCAGAGAATAAGGACATACAAAACACCGAATTTAAAGAGCAATTGATAACATTAAAAGACAGTAATACTGCTAAAATAATTCAACTAAGAGATGCCATAACTAATTTTGGAAATAAATATATAGTAAGATTGCCTTTCAAAGAAATATTAGGTATAAGAATCCCTGTTAAAATAAAATTGACACCCAAAGTATCTTATAAAATATTAGCACTAGTAGACACTGGGTGTACAAAGAATATTATTCATGACAAATATTTCACAAGATGTCCTGAAATAGTTCACACAATTGACGACAATAAGGCAGAAGTTTCCACAGACATGTCCGGAATAAAGAAAATTCATAATCAGTTAGCTTATAATATGGAGGTTTACATTAATGCAACTAAATATATAATAGATGAGATTACAATAAGAGATTTGTCAATGATTAATGATGACATGATAATTGGCCTAAGGTTCCTTCAACAATCAGTACAAACCACAGTAATACATGAGCAAGGAATTACTTTTATCCCATATCAAAATACTGTTCCATATATCTCAGAGGTACGAAAGCGTGGTGGAACCTCCCCCTCCCCAAAACCCGACAAACTCGACAACTTAGAAGTACCCAATCTTGAGTCTGAAGAAAGAATTAATGAATATGAGCTTAGTGAGAATATAGACAACTATTCTTTCTCATCATATCTTCCAAAATCTATAGAATTGCCAGGTAAGACATC--ATGGGAAGATAGATATT----------------TATTAAAAGCTACTAAAGATTTTGAATATAT---------------------------ATGCAGGGAAATGGCTTCACAGAAGTCTG----------AATGGCTCACAAATATGAGTTCATGGAGACTGCCCCAACTGCCCAGAGGCCATGGAGAACGATTTAATCACAATTTCAGA-----ATAACAGAGCTAC---AACAAGGGTTATTAA----------------------------ATCTTTTGTGGCAAACAAAAA----------------------------------ACAAAAAAGAAAAAGCTC-------------------ATGCCTTAAATGGCT----------------------------------TGGCATATTATTTCAAAAATTT-----------CGTGCCCTCAGATCAAAAGATAACAGAAAA--------------------------------------------AAGGGCT----------------------------------------------AAAATGCAAGATATCCCTCATCATGAAGAAAGGT---TACTAGATTATCGCGAGGA---------------GAAATCCCGTGATGGCCA------------AGATAAACTTCTCATGGAAGTCGAACAA------TCTATGGCAACAGATAAGAATACCAAGGTATTCTCAGATAAGATTTTGATCTCAGCAGATCCTGCTTCGA----------------GCATGGTTGCTTTCCACATAAATATCAATAACCTATTGCAATCTTTCCCACATAATAAACCATCATCATCCACAAAAAGGCATGATATCATTCCCCAAACACCATACATACTGC--ATAATCATCC---TAATTTATTCCTTCCACAA-----TATATACTCCGGACTCAGCCAAAAGCACCATGTAGATCTTGTGCCTACA--------------AAGATTCTTGCAAAAAGAAACTTAAAAGCCAAAATC----------CCATGAG--------TACTACAT-------ACGAAAATCTCCAACCCAGATTAAGCTTC------------AAAACGGAACAAACTTTATCCTGCTTTGGGCAAGACA--------------TCCTCGATCTTGT----------TTGGCAAAAGTTTAAGGAGAGA--------CAAATGAAAATATTCCTTGGACTCCAAGATTATTTCTTTGATCTT------------TTAGAAGGG--------------------------------------AGAGAAAGAAACCCAGCCATACGAGTAATCATATATATGCTCCCTCTCTTAAGACTAGATAATCAGGCAATTTCTGACC------------------------CATCCTATA-GATTCCTGGT---------TCTCAAAGCTGAGATAAATCTTCAAAGATTCCGGAACCTA----CCCACATACAACCATGA----------AGAAATATCTCTCCAAACCATTATAGATCATGGTCTTGTGAATTCCATATATGCAACCCTCGATCAGATCCTTCAATCTGATTTAGGAAATGCTGTG-----------------AAAGATGTCTGCAGGAGACTTG-----GACATGGAAGA---TACAGGATTATCTTCTCCTCAATA------CCACCAA--------AATTCACACCACCTGTTCGTCCAGCAATTCATTATATATATATCA--TGAAGGGACAAT--------------TTAATTTTCAAGAAGACGGTCTTAGCAAACT-------------ATCGGATGAAGA----GGAAGAAATATATACAACAGTTGCTAATCATGAAA---------------ATTGG----AGATTATTTTCTGAAGC--------------------------TGCAGAAA--TTGAAGAAGCTATCACCACAGATTATGAATATC-----AGCTGGTTTTCCAAAACAAGATCACAAGGATTTTTATCAGCAAATTCTACAACCAAAGTTATGAATACTTCAAGGGAGCAGGGCGCATAATTAAACCGGATT-------TTGGAAATGAATGCTCCAAGAAAAGTTACTACAGAAACCTGGCTCAGTGGTTTCAGAAAACAGAGCCATCAGAGATTGACACGGTACAATCAGCACCAATGATAATCAACGAAGATAATGAATAAAGATTTTGTCATCCCCGACAAAGATCACGATTCAAGATAAGGAATCTATA----CTATTCCAGAT-----AAGTATGGATCTTGGTGGCCATGGGCAACCAGATGAATAAATTAATATAAGCTAAATATGTTTTTCAATATATATTGATAATAGAATATCAATAATTTGGGCGTGGAAGAAGAATAAACGAATTTCAGAAGACTACTCAAGAAGGAATCCAGAAGAAGGAATCCAGAAGGACACCCTATAAAGCATAAAGGAACAATATAGGGTGCGGTGAATGACATATCCCTGTGAAGAATAAAACTTTCGGTGGAAAGGCCCCGGCTTTAGCTAGCTCTCGTGAATCCACAGTAGCGAAGAGATAAGCAGGAGACACAGGCGACGCCATCCCTGGCCTCTATAAAAGGAGACGTTGGCCTTCACTCCGGAG--GAAGACACCATTCAGAGCAAAGCTTTCAAGCGCGCTCTCACCCTCCATTCCACCGTTCTTAGTAGTAGTGACTTTAGCCTACCTTGCATAGTATATTGAAGCAAGGAGTTGTGTAATAACGCTGTGTAAGGTAAGAACAGCTTGCTTGTACCTACCTTCGGGTTTCCCGAAAGGGAAAACCGTATGTAAGCTTATCTGTTTAATATGAAGTAATTTTCCTTAAGTATTCCTGCACGTTTGTTCTAGACAAGTGTTTATGCTAAGGACCCTATAGGAGAAACCTCTTCGGTTTGTTCTCGTTTTTAGCCTGCATCTTGCATAGGCGTCTGGAGAATCGGTATCCGTAGAAAAGTGTTCCCTTCGGGTGGAACTGCCTGGGGAGACGATAAACTCTTAGCTAGAACAAGTGTGACTTGGAATATCTTGTTAAGTTGCTTCTAAAAAGATAGATAGGTGAGGCATACGGTAAGTACCGAGTAGGACTTTATATCATCTGAAGCAAGCTTCTGAGGCTGTCTAAATAGGATTCGCCACCCTGCAAAGATCCTAAAGTTAAAATATCTCTCGAAGTGAACAGTACTGAACAGTAATT--------------------------------------------TAAACAGTAAACTGAATAGTATTCAGCCGAATAAATAGT
>chr08:11155205-11157994R
-------------------------------------------------------------------------------------------------------------------------------------------------------------------------------------------------------------------------------------------------------------------------------------------------------------------------------------------------------------------------------------------------------------------------------------------------------------------------------------------------------------------------------------------------------------------------------------------------------------------------------------------------------------------------------------------------------------------------------------------------------------------------------------------------------------------------------------------------------------------------------------------------------------------------------------------------------------------------------------------------------------------------------------------------------------------------------------------------------------------------------------------------------------------------------------------------------------------------------------------------------------------------------------------------------------------------------------------------------------------------------------------------------------------------------------------------------------------------------------------------------------------------------------------------------------------------------------------------------------------------------------------------------------------------------------------------------------------------------------------------------------------------------------------------------------------------------------------------------------------------------------------------------------------------------------------------------------------------------------------------------------------------------------------------------------------------------------------------------------------------------------------------------------------------------------------------------------------------------------------------------------------------------------------------------------------------------------------------------------------------------------------------------------------------------------------------------------------------------------------------------------------------------------------------------------------------------------------------------------------------------------------------------------------------------------------------------------------------------------------------------------------------------------------------------------------------------------------------------------------------------------------------------------------------------------------------------------------------------------------------------------------------------------------------------------------------------------------------------------------------------------------------------------------------------------------------------------------------------------------------------------------------------------------------------------------------------------------------------------------------------------------------------------------------------------------------------------------------------------------------------------------------------------------------------------------------------------------------------------------------------------------------------------------------------------------------------------------------------------------------------------------------------------------------------------------------------------------------------------------------------------------------------------------------------------------------------------------------------------------------------------------------------------------------------------------------------------------------------------------------------------------------------------------------------------------------------------------------------------------------------------------------------------------AAAAGCTATGGAATTGCCAGGTAAGACATC--ATGGGAAGATAGATATT----------------TATTAAAAGCTACTAAAGATTTTGAATATAT---------------------------ATGCAGGGAAATGGCTTCACAGAAGTCTG----------AATGGCTCACAAATATGAGTTCATGGAGACTGCCCCAACTGCCCAGAGGCCATGGAGAACGATTTAATCACAATTTCAGA-----ATAACAGAGCTAC---AACAAGGGTTATTAA----------------------------ACCTCTTGTGGCAAACAAAAA----------------------------------ACAAAAAAGAAAAAGCTC-------------------ATGCCTTAAATGGCT----------------------------------TGGCATATTATTTCAAAAATTT-----------CGTGCCCTCAGATCAAAAGATAACAGAAAA--------------------------------------------AAGGGCT----------------------------------------------AAAATACAAGATATCCCTCATCATGAGGACAGGT---TACTAGATTATCGCGAGGA---------------GAAATCCCGTGATGGCCA------------AGATAAACTTCCCATGGAAGTTGAACAA------TCTATGGCAACAGATAAGAATACCAAGGTATTCTCAGATAAGATTTTGATCTCAGCAGATCCTGCTTCGA----------------GCATGGTTGCTTTCCACATAAATATCAATAACCTATTGCAATCTTTTCCACATAATAAACCATCATCATCCACAAAAAGGCATGATACCATTCCCCAAACACCATACATACTGC--ATAATCATCC---TAATTTATTCCTTCCACAA-----TATATACTCCGGACCCAGCCAAAAGCACCATGTAGATCTTGTGCCTACA--------------AAGATTCTTGCAAAAAGAAACTTAAAAGCCAAAATC----------CCATGAG--------TACTACAT-------ACGAAAATCTCCAACCCAGATTAAGCTTC------------AAAACGGAACAAACTTTATCCTGCTTTGGGCAAGACA--------------TCCTCGATCTTGT----------TTGGCAAAAGTTTAAGGAGAGA--------CAAATGAAAATATTCCTTGGACTCCAAGATTATTTCTTTGATCTC------------TTAGAAGGG--------------------------------------AGAGAAAGAAACCCAGCCATACGAGTAATCATATATATGCTCCCTCTCTTAAGACTAGATGAACAGGCAATTTCTGACC------------------------CATCCTATA-GATTCCTGGT---------TCTCAAAGCTGAGATAAATCTTCAAAGATTCCGGAACCTA----CCCACATACAACCATGA----------AGAAATATCTCTCCAAACCATTATAGATCATGGTCTTGTGAATTCCATATATGCAACCCTCGATCAGATCCTTCAATCTGATTTAGGAAACGCTGTG-----------------GAAGATGTCTGCAGGAGACTTG-----GACATGGAAGA---TACAGGATTATCTTCTCCTCAATA------CCACCAA--------AATTCACACCACCTGTTCGTCCAGCAATTCATTATATATATATCA--TGAAGGGACAAT--------------TTAATTTTCAAGAAGACGGTCTTAGCAAACT-------------ATCGGATGAAGA----GGAAGAAATATATACAACAGTTGCTAATCATGAAA---------------ATTGG----AGATTATTTTCTGAAGC--------------------------TGCAGAAA--TTGAAGAAGCTATCACCACAGATTATGAATATC-----AGCTGGTTTTCCAAAACAAGATCACAAGGATTTTTATCAGCAAATTCTACAACCCAAGTTATGAATACTTCAAGGGAGCAGGGCGCATAATTAAACCGGATT-------TTGGAAATGAATGCTCCAAGAAAAGTTACTACAGAAACCTGGCTCAGTGGTTTCAGAAAACAGAGCCATCAGAGATTGACACGGTACAATCAGCACCAATGATAATCAACGAAGATAATGAATAAAGATTTTGTCATCCCCGACAAAGATCACTATTCAAGATAAGGAATCTACA----CTATT-CAGAT-----AAGTATGGATCTTGGTGGTCATGGGCAGCCAGATGAATAGAATTCTTTAAGCTAAATATGTTTTTCAATATATATTGATAATAGAATATCAATAATTTGGGCGTGGAAGAAGAATAAACGAATTTCAGAAGACTACTCAAGAAGGAATACAGAAGAAGGAATCCAGAAGGACACCCTATAAAGCATAAAGGAACAATATAGGGTGCGGTGAATGACATATCCCTGTGAAGAATAAAACTTTCGGTGGAAAGGCCCCGGCTTTAGCTAGCTCTCGTGAATCCACAGTAGCGAAGAGATAAGCAGGAGACACAGGCGACGCCATCCCTGGCCTCTATAAAAGGAGACGTTGGCCTTCACTCCGAGGAGGAAGACACCATCCAGAGCAAAGCTTTCAAGCGCGCTCTCACCCTCCATTCCACCATTCTTAGTAGTAGTGACTTTAGCATACCTTGCATAGTATATTGAAGCAAGGAGTTGTGTAATAACGCTGTGTAAGGTAAGAACAGCTTGCTTGTACCTACCTTCGGGCTTCCCGAAAGGGAAAACCGTATGTAAGCTTATCTGTTTAATATGAAGTAATTTTCCTTAAGTATTCCTGCACGTTTGTTCTAGACAAGTGTTTATGCTAAGGACCCTATAGGAGAAACCTCTTCGGTTTGTTCTCGTTTTTAGCCTGCATCTTGCATAGGCGTCTGGAGAATCGGTATCCGTAGAGAAGTGTTCCCTTCGGGTGGAACTGCCTGGGGAGACGATAAACTCTTAGCTAGAACAAGTGTGACTTGGAATATCTTGTTAAGTTGCTTCTAAAAAGATAGATAGGTGAGGCATACGGTGAGTACCGAGTAGGACTTTACATCATCTGAAACAAGCTTCTGAGGCTGTCTAAGTAGGATTCGCCACCCTGCAAAGATCCTAAAGTTAAAATATCTCTCGAAGTGAACAGTATTGAACAGTAATTTAAACAGTAAACTGAATAGTGTTTTTGAATAGTAATCAGCCGAATAAACAGTAAACTGAATAGTATTCAGCCGAATAAATAGT
>chr08:11198926-11200223F
------------------------------------------------------------------------------------------------------------------------------------------------------------------------------------------------------------------------------------------------------------------------------------------------------------------------------------------------------------------------------------------------------------------------------------------------------------------------------------------------------------------------------------------------------------------------------------------------------------------------------------------------------------------------------------------------------------------------------------------------------------------------------------------------------------------------------------------------------------------------------------------------------------------------------------------------------------------------------------------------------------------------------------------------------------------------------------------------------------------------------------------------------------------------------------------------------------------------------------------------------------------------------------------------------------------------------------------------------------------------------------------------------------------------------------------------------------------------------------------------------------------------------------------------------------------------------------------------------------------------------------------------------------------------------------------------------------------------------------------------------------------------------------------------------------------------------------------------------------------------------------------------------------------------------------------------------------------------------------------------------------------------------------------------------------------------------------------------------------------------------------------------------------------------------------------------------------------------------------------------------------------------------------------------------------------------------------------------------------------------------------------------------------------------------------------------------------------------------------------------------------------------------------------------------------------------------------------------------------------------------------------------------------------------------------------------------------------------------------------------------------------------------------------------------------------------------------------------------------------------------------------------------------------------------------------------------------------------------------------------------------------------------------------------------------------------------------------------------------------------------------------------------------------------------------------------------------------------------------------------------------------------------------------------------------------------------------------------------------------------------------------------------------------------------------------------------------------------------------------------------------------------------------------------------------------------------------------------------------------------------------------------------------------------------------------------------------------------------------------------------------------------------------------------------------------------------------------------------------------------------------------------------------------------------------------------------------------------------------------------------------------------------------------------------------------------------------------------------------------------------------------------------------------------------------------------------------------------------------------------------------------------------------------------------------------------------------------------------------------------------------------------------------------------------------------------------------------------------------------------------------------------------------------------------------------------------------------------------------------------------------------------------------------------------------------------------------------------------------------------------------------------------------------------------------------------------------------------------------------------------------------------------------------------------------------------------------------------------------------------------------------------------------------------------------------------------------------------------------------------------------------------------------------------------------------------------------------------------------------------------------------------------------------------------------------------------------------------------------------------------------------------------------------------------------------------------------------------------------------------------------------------------------------------------------------------------------------------------------------------------------------------------------------------------------------------------------------------------------------------------------------------------------------------------------------------------------------------------------------------------------------------------------------------------------------------------------------------------------------------------------------------------------------------------------------------------------------------------------------------------------------------------------------------------------------------------------------------------------------------------------------------------------------------------------------------------------------------------------------------------------------------------------------------------------------------AATAAGATCACAAGGATTTTTATCAGCAAATTCTACAACCAAAGCTATGAATACTTCAAGGGAGCAGGGCGCATAATTAAACCGGATT-------TTGGAAATGAATGCTCCAAGAAAAGTTACTACAGAAGCCTGGCTCAGTGGTTTCAGAAAACAGAGCCATCAGAGATTGACACGGTACAATCAGCACCAATGATAATCAACGAAGATAATGAATAAAGATTTTGTCATCCCCGACAAAGATCACAATTCAAGATAAGGAATCTATA----CTATTCCAGAT-----AAGTATGGATCTTGGTGGCCATGGGCAGCCAGATGAATAGAATTCTTTAAGCTAAATATGTTTTTCAATATATATTGATAATAGAATATCAATAATTTGGGCGTGGAAGAAGAATAAACGAATTTCAAAACACTACTCAAGAAAGGTTATCCAAGAAAGAATCCAGAAGGACACCCTATAAAGTATAAGGGGACAATATAGGATGCGGTGAATGACATATCCCTGTGAAGAATAAAACTTTCGGTGGAAAGGCCTCGACTTCAGCAAGCTCTCGTGAATCCACAGTAGCGAAGAGATAAGCAGGAGACACAGGCGAAGCCATCCCTGGCCTCTATAAAAGGACAACAACAACGAAACAACGAAAAGGAAGACACCATTCAGAGCAAAGCTTCCAAGCGCGCTCTCACCCTCCATTCCACCATTCTTAGTAGTAGTGACTTTAGACTACCTTGCATAGTATATTGAAGCAAGGAGGTGTGTTATAACGCTGTGTAAGGTAAGAACAGCTTGCTTGTACCTACCTTCGGGTTTCCCGAAAGGGAAAACCGTATGTAAGCTTATCTGTTTAATATGAAGTAATTTTCCTTAAGTATTCCTGCACGTTTGTTCTAGACAAGTGTTTATGCTAAGGACCCTATAGGAGAAACCTCTTCGGTTTGTTCTCGTTTTTAGCCTGCATCTTGCATAGGCGTCTGGAGAATCGGTATCCGTAGAGAAGTGTTCCCTTCGGGTGGAACTGCCTGGGGAGACGATAAACTCTTAGCTAGAACAAGTGTGGCTTGGAATATCTTTTTAAGTTGCTTCTAAAAAGACAGATAGGTGAGGCATACGGTGAGTACCGAGTAGGACTTTATATCATCTGAAGCAAGCTTCTGAGGCTGTCTAAATAGGATTCGCCACCCTGCAAAGATCCTAAAGTTAAAATATCTCTCGAAGTGAACAGTACTGAACAGTA----------------------------------------------------------CTGAACAGTATTCAGCCGAATAAATAGT
>chr08:11211872-11214728F
----------------------------------------------------------------------------------------------------------------------------------------------------------------------------------------------------------------------------------------------------------------------------------------------------------------------------------------------------------------------------------------------------------------------------------------------------------------------------------------------------------------------------------------------------------------------------------------------------------------------------------------------------------------------------------------------------------------------------------------------------------------------------------------------------------------------------------------------------------------------------------------------------------------------------------------------------------------------------------------------------------------------------------------------------------------------------------------------------------------------------------------------------------------------------------------------------------------------------------------------------------------------------------------------------------------------------------------------------------------------------------------------------------------------------------------------------------------------------------------------------------------------------------------------------------------------------------------------------------------------------------------------------------------------------------------------------------------------------------------------------------------------------------------------------------------------------------------------------------------------------------------------------------------------------------------------------------------------------------------------------------------------------------------------------------------------------------------------------------------------------------------------------------------------------------------------------------------------------------------------------------------------------------------------------------------------------------------------------------------------------------------------------------------------------------------------------------------------------------------------------------------------------------------------------------------------------------------------------------------------------------------------------------------------------------------------------------------------------------------------------------------------------------------------------------------------------------------------------------------------------------------------------------------------------------------------------------------------------------------------------------------------------------------------------------------------------------------------------------------------------------------------------------------------------------------------------------------------------------------------------------------------------------------------------------------------------------------------------------------------------------------------------------------------------------------------------------------------------------------------------------------------------------------------------------------------------------------------------------------------------------------------------------------------------------------------------------------------------------------------------------------------------------------------------------------------------------------------------------------------------------------------------------------------------------------------------------------------------------------------------------------------------------------------------------------------------------------------------------------------------------------------------------------------CCCAAAACCCGACAAACTCGACAACTTAGAAGTACCCAATCTTGAGTCTGAAGAAAGAATTAATGAATATGAGCTTAGTGAGAATATAGACAACTATTCTTTCTCATCATATCTTCCAAAATCTATAGAATTGCCAGGTAAGACATC--ATGGGAAGATAGATATT----------------TATTAAAAGCTACTAAAGATTTTGAATATAT---------------------------ATGCAGGGAAATGGCTTCACAGAAGTCTG----------AATGGCTCACAAATATGAGTTCATGGAGACTGCCCCAACTGCCCAGAGGCCATGGAGAACGATTTAATCACAATTTCAGA-----ATAACAGAGCTAC---AACAAGGGTTATTAA----------------------------ATCTTTTGTGGCAAACAAAAA----------------------------------ACAAAAAAGAAAAAGCTC-------------------ATGCCTTAAATAGCT----------------------------------TGGCATATTATTTCAAAAATTT-----------CGTGCCCTCAGATCAAAAGATAACAGAAAA--------------------------------------------AAGGGCT----------------------------------------------AAAATGCAAGATATCCCTCATCATGGAGAAAGGT---TACTAGATTATCGCGAGGA---------------GAAATCCCGTGATGGCCA------------AGATAAACTTCTCATGGAAGTCGAACAA------TCTATGGCAACAGATAAGAATACCAAGGTATTCTCAGATAAGATTTTGATCTCAGCAGATCCTGCTTCGA----------------GCATGGTTGCTTTCCACATAAATATCAATAACCTATTGCAATCTTTCCCACATAATAAACCATCATCATCCACAAAAAGGCATGATATCATTCCCCAAACACCATACATACTGC--ATAATCATCC---TAATTTATTCCTTCCACAA-----TATATACTCCGGACTCAGCCAAAAGCACCATGTAGATCTTGTGCCTACA--------------AAGATTCTTGCAAAAAGAAACTTAAAAGCCAAAATC----------CCATGAG--------TACTACAT-------ACGAAAATCTCCAACCCAGATTAAGCTTC------------AAAACGGAACAAACTTTATCCTGCTTTGGGCAAGACA--------------TCCTCGATCTTGT----------TTGGCAAAAGTTTAAGGAGAGA--------CAAATGAAAATATTCCTTGGACTCCAAGATTATTTCTTTGATCTT------------TTAGAAGGG--------------------------------------AGAGAAAGAAACCCAGCCATACGAGTAATCATATATATGCTCCCTCTCTTAAGACTAGATAATCAGGCAATTTCTGACC------------------------CATCCTATA-GATTCCTGGT---------TCTCAAAGCTGAGATAAATCTTCAAAGATTCCGGAACCTA----CCCACATACAACCATGA----------AGAAATATCTCTCCAAACCATTATAGATCATGGTCTTGTGAATTCCATATATGCAACCCTCGATCAGATCCTTCAATCTGATTTAGGAAATGCTGTG-----------------AAAGATGTCTGCAGGAGACTTG-----GACATGGAAGA---TACAGGATTATCTTCTCCTCAATA------CCACCAA--------AATTCACACCACCTGTTCGTCCAGCAATTCATTATATATATATCA--TGAAGGGACAAT--------------TTAATTTTCAAGAAGACGGTCTTAGCAAACT-------------ATCGGATGAAGA----GGAAGAAATATATACAACAGTTGCTAATCATGAAA---------------ATTGG----AGATTATTTTCTGAAGC--------------------------TGCAGAAA--TTGAAGAAGCTATCACCACAGATTATGAATATC-----AGCTGGTTTTCCAAAACAAGATCACAAGGATTTTTATCAGCAAATTCTACAACCAAAGTTATGAATACTTCAAGGGAGCAGGGCGCATAATTAAACCGGATT-------TTGGAAATGAATGCTCCAAGAAAAGTTACTACAGAAACCTGGCTCAGTGGTTTCAGAAAACAGAGCCATCAGAGATTGACACGGTACAATCAGCACCAATGATAATCAACGAAGATAATGAATAAAGATTTTGTCATCCCCGACAAAGATCACTATTCAAGATAAGGAATCTACA----CTATT-CAGAT-----AAGTATGGATCTTGGTGGCCATGGGCAACCAGATGAATAAATTAATATAAGCTAAATATGTTTTTCAATATATATTGATAATAGAATATCAATAATTTGGGCGTGGAAGAAGAATAAACGAATTTCAGAAGACTACTCAAGAAGGAATCCAGAAGAAGGAATCCAGAAGGACACCCTATAAAGCATAAAGGAACAATATAGGGTGCGGTGAATGACATATCCATGTGAAGAATAAAACTTTCGGTGGAAAGGCCCCGGCTTTAGCTAGCTCTCGTGAATCCACAGTAGCGAAGAGATAAGCAGGAGACACAGGCGACGCCATCCCTGGCCTCTATAAAAGGAGACGTTGGCCTTCACTCCGAGGAGGAAGACACCATCCAGAGCAAAGCTTTCAAGCGCGCTCTCACCCTCCATTCCACCGTTCTTAGTAGTAGTGACTTTAGCCTACCTTGCATAGTATATTGAAGCAAGGAGTTGTGTAATAACGCTGTGTAAGGTAAGAACAGCTTGCTTGTACCTACCTTCGGGTTTCCCGAAAGGGAAAACCGTATGTAAGCTTATCTGTTTAATATGAAGTAATTTTCCTTAAGTATTCCTGCACGTTTGTTCTAGACAAGTGTTTATGCTAAGGACCCTATAGGAGAAACCTCTTCGGTTTGTTCTCGTTTTTAGCCTGCATCCTGCATAGGCGTCTGGAGAACCGGTATCCGTAGAGAAGTGTTCCCTTCGGGTGGAACTGCCTGGGGAGACGATAAACTCTTAGCTAGAACAAGTGTGACTTGGAATATCTTTTTAAGTTGCTTCTAAAAAGACAGATAGGTGAGGCATACGGTAAGTACCGAGTAGGACTTTACATCATCCGAAACAAGCTTCTGAGGCTGTCTAAATAGGATTCGCCACCCTGCAAAGATCCTAAAGTTAAAATATCTCTCGAAGTGAACAGTACTGAACAGTAATT--------------------------------------------TAAACAGTAAACTGAATAGTATTCAGCCGAATAAATAGT
>chr08:11180477-11186865F
----------------------------------------------------------------------------------------------------------------------------------------------------------------------------------------------------------------------------------------------------------------------------------------------------------------------------------------------------------------------------------------------------------------------------------------------------------------------------------------------------------------------TTGTTCTGATAAACAAAAAGGTAAAAATGAAGACATAGATGAGCTTGAAGATATTGCAGAAGTAGACAAACAGCTCGAAAGATATCAACGAGATACTTTAAGGGCAATAAGACCTCAACAAATATATTGCATGGGATTTTTTGAGAATAAAAATGGGTTATACAGAATATCTAGAGAAGTAGAGTTAAGCGTTTTAACAAAGCCAGTTGAGTTAAAAATTGTAGCCAAGGAATTTGAAAATGGATTAAAGTATTCAGGGTATAAATATATTCACCAAGGTATGTATATAATAGGAATCAAAGGTATGACAAGAAAGAAATTAGGAGCTAAAGTTCTAATAACTCTGTTAGATAAAAGGTGGGACACAATAGATAAAGCAGCATTAGGATTTTTAGAAGGTGACATGAATGAGAATATGTTGATAACATATATAGCCCCAGATCTAATGATGCCTATAAAAGAATTTATAGATAAAATGAGTTTTGGTTTTCAAACAAAGGGATACGAAGAATTTAAAGGAACAAATTTGCTAGTAAGCATAGAATTTATAGGAAGATTAACTAATAGAAGTGCCTCCAAATACAAAATAAATGTAAATGACGTGATTGAAAATATGCACTCTAAGGGAATAACTTTCATGAGCCCTTTAAAAATAAGTTCTGAAGAAAGGGCAGGAGAAGAATGGAAAATTAGTGATTTAATTGAAAGCAAAACTTTGAGTCAGCCTGAAAATTTTATAAGTTATCAAAACAGTAAAGGAAATACAAGCATTAGATTTATAAATTACAAACCCAGAACCACAGATGACTTAGAAACAGAAGCATCTGATAGAAATATAATAGATAATAGAAGACATAGTGTTTCAGAGTTTATGGAAAAATTAGATCAAGAAAGTGAGATAAAATATTACGAAAATAAATTAAAGGAAATAAATGAAGAATATAATAACTCTATGAAGTGTGAGTGGCCTAAAATAAGAGATAAAGAACTTTATTTCTATAGAGAATTAGCTAGAGTAAAGAAAGTAAAGAAGAACGAAGATATGGCAGTAGAAATTTTTAAAAACCA---------------------AGAGCAAGATAAGCATGACAAAGAAGAGCAAAATCTTGGTAAAATTTTAAGTGAAGAAGAGCAATGGGCAGAGAATGAAAGATTATTTCTTGAAAGTTATGAAGAAGAAATTAATCTAATAAATGAGATGGAGAATATAGAAAATGAAATAGACAATACAGAACAATATAATGATTTTATAAACACATTAGATGAAGTAGGGTTACATAATCTTGATAATGCAATGGAAGCTATGGAAGTGGACTTAGGAACAGGAAAGAGAAAAAGATATGGAGAAGGTACTGTGAAAAACGAAGGAGAAAGAGAAAGACCAGCTAGGGCAGCAGGAAAATGGCCCCCTGATAGAGAAGAATTTTCATATAACTATATACCAGGTCAATATAGGCATATGGGTACAAAAAGAAGAGACTTTGAGAAGCCTGTTAAATTTCAAAACCAGAGGAGTGATGGTGCTATATTAAATTTAGCCGCACATGACCCTATTGATTGGCCTAATATTATTAGTATTTGGAAAGGTTTAATAGTTCAAAAATATATTCAAAACCAGCACAATATAGGAAGTAAAGTTGAAGATATGATAACCTACTTAGAAACATTCTTAGGTGAATCTGCTAAGATTCTATGGGAACAATGGGTTGAAAAGAATCCTAATAATTATGAAGAATTGAAAAGAGCTGGTAGCAATCCGCATAATTTTGCAAATGTTATATCTAACATTATTATAGCTGAAGATCCGGAATTAGGTTATACAACTTTGCAAAATGAAAGGTTAAAAGAAATAGAAAAATTAACGTTAACAAGTTGGAAAGGCATAAAAGAATTCTCCCAACATTATTTATATAATGCTACAACTGCTAAGCAAGGATACAATAAGGGAATAGTTGAGCGATATTTTAATAAACTACCTGACCCATTAGGTAGTATGATTTTTGAGGAATATAAAAAGGAAACTGAAGGAGCTGAAATTAATATTTCCCAAGCCATAACCTTCGTGTTCAAACAATTAAGAAAAATATGCACAGGAATACAAGCCCAAAGGTCTATGAAACACTCGGATTACAATTTCTGCAATAAAATAGTTCAAATACCCTTGTCATATGGAGAAGACAAGCCTAGAAGTAAAAGGATTTATAAACATCAAAATAGAAACCATAATAATATTAGAACAAAGAAAAGGTATTTCTTAAGAAGATCAGATAATAGAGCACCCTTCTTACATAAAAGAAATGTAAGAAGATATAATCCAAAGAAAACCTATGACAAAACATGCAGATGTTTTATATGCAACTCGCCAGATCATTTAAGTAGAACATGCCCAAATAAAGATCAAAAGAGATATTCTAGTAAATATGAAGAACAAGAGAGGGTTCTAATTATAGATAGCGTAAATGAAAATATATTAGTATGTGATGATGAAATAAAAGATGACGAGTCAATATATTCTATCATAGAAACAGACGAAGTTGAAACCATCAACGAAGAATATGAATCATCCGATGAAGAGTTAGATTTAATTGACGAATTAGCAGGTTTAAAGGTTGAAATGATGGATCAATTAAATTGTGAACATGATTGGATTAGAGGAAAGGGTGACTATAATATCAAATGTGCTTTTTGCATATATTATCCAAGTCAAGAAAATAGAGTGACTTGTAGTATATGTCTAAAACAAGCTTGTGCTGAATGTATAAAAGCAAATAAACAAAAATGGAGAAAAGAAATAGAATTAGAATCAGATGAAAAGACTTTATCTAGTAGAGTACGAGTGTTAGAAAATAGACTAAATAAACTAGAAGTAGAATTAGAGAACCTAAAAAATAATTGCGATATTAAGGCACTACCAGAGAATAAGGACATACAAAACACCGAATTTAAAGAGCAATTGATAACATTAAAAGACAGTAATACTGTTAAAATAATTCAACTAAGAGATGCCATAACTAATTTTGGAAATAAATATATAGTAAGATTGCCTTTCAAAGAAATATTAGGTATAAGAATCCCTGTTAAAATAAAATTGACACCCAAAGTATCTTATAAAATATTAGCACTAGTAGACACTGGGTGTACAAAGAATATTATTCATGACAAATATTTCACAAGATGTCCTGAAATAGTTCACACAATTGACGACAATAAGGCAGAAGTTTCCACAGACATGTCCGGAATAAAGAAAATTCATAATCAGTTAGCTTATAATATGGAGGTTTACATTAATGCAACTAAATATATAATAGATGAGATTACAATAAGAGATTTGTCAATGATTAATGATGACATGATAATTGGCCTAAGGTTCCTTCAACAATCAGTACAAACCACAGTAATACATGAGCAAGGAATTACTTTTATCCCATATCAAAATACTGTTCCATATATCTCAGAGGTACGAAAGCGTGGTGGAACCTCCCCCTCCCCAAAACCCGACAAACTCGACAACTTAGAAGTACCCAATCTCGAGCCTGAAGAAAGAATTAATGAATATGAGCTTAGTAAGAATATAGACAACTATTCTTTCTCATTATATCTTCCAAAATCTATAGAATTGCCAGGTAAGACATC--ATGGGAAGATAGATATT----------------TATTAAAAGCTACTAAAGATTTTGAATATAT---------------------------ATGCAGGGAAATGGCTTCACAGAAGTCTG----------AATGGCTCACAAATATGAGTTCATGGAGACTGCCCCAACTGCCCAGAGGCCATGGAGAACGATTTAATCACAATTTCAGA-----ATAACAGAGCTAC---AACAAGGGTTATTAA----------------------------ACCTCTTGTGGCAAACAAAAA----------------------------------ACAAAAAAGAAAAAGCTC-------------------ATGCCTTAAATGGCT----------------------------------TGGCATATTATTTCAAAAATTT-----------CGTGCCCTCAGAACAAAAGATAACAGAAAA--------------------------------------------AAGGGCT----------------------------------------------AAAATGCAAGATATCCCTCATCATGAAGAAAGGT---TACTAGATTATCGCGAGGA---------------GAAATCCCGTGATGGCCA------------AGATAAACTTCTCATGGAAGTCGAACAA------TCTATGGCAACAGATAAGAATACCAAGGTATTCTCAGATAAGATTTTGATCTCAGCAGATCCTGCTTCGA----------------GCATGGTTGCTTTCCACATAAATATCAATAACCTATTGCAATCTTTCCCACATAATAAACCATCATCATCCACAAAAAGGCATGATATCATTCCCCAAACACCATACATACTGC--ATAATCATCC---TAATTTATTCCTTCCACAA-----TATATACTCCGGACTCAGCCAAAAGCACCATGTAGATCTTGTGCCTACA--------------AAGATTCTTGCAAAAAGAAACTTAAAAGCCAAAATC----------CCATGAG--------TACTACAT-------ACGAAAATCTCCAACCCAGATTAAGCTTC------------AAGACGGAACAAACTTTATCCTGCTTTGGGCAAGACA--------------TCCTCGATCTTAT----------TTGGCAAAAGTTTAAGGAGAGA--------CAAATGAAAATATTCCTTGGACTCCAAGATTATTTCTTTGATCTC------------TTAGAAGGG--------------------------------------AGAGAAAGAAACCCAGCCATACGAGTAATCATATATATGCTCCCTCTCTTAAGACTAGATAATCAGGCAATTTCTGACC------------------------CATCCTATA-GATTCCTGGT---------TCTCAAAGCTGAGATAAATCTTCAAAGATTCCGGAACCTA----CCCACATACAACCATGA----------AGAAATATCTCTCCAAACCATTATAGATCATGGTCTTGTGAATTCCATATATGCAACCCTCGATCAGATCCTTCAATCTGATTTAGGAAATGCTGTG-----------------AAAGATGTCTGCAGGAGACTTG-----GACATGGAAGA---TACAGGATTATCTTCTCCTCAATA------CCACCAA--------AATTCACACCACCTGTTCGTCCAGCAATTCATTATATATATATCA--TGAAGGGACAAT--------------TTAATTTTCAAGAAGACGGTCTTAGCAAACT-------------ATCGGATGAAGA----GGAAGAAATATATACAACAGTTGCTAATCATGAAA---------------ATTGG----AGATTATTTTCTGAAGC--------------------------TGCAGAAA--TTGAAGAAGCTATCACCACAGATTATGAATATC-----AGCTGGTTTTCCAAAACAAGATCACAAGGATTTTTATCAGCAAATTCTACAACCAAAGTTATGAATACTTCAAGGGAGCAGGGCGCATAATTAAACCGGATT-------TTGGAAATGAATGCTCCAAGAAAAGTTACTACAGAAACCTGGCTCAGTGGTTTCAGAAAACAGAGCCATCAGAGATTGACACGGTACAATCAGCACCAATGATAATCAACGAAGATAATGAATAAAGATTTTGTCATCCCCGACAAAGATCACGATTCAAGATAAGGAATCTATA----CTATTCCAGAT-----AAGTATGGATCTTGGTGGCCATGGGCAACCAGATGAATAAATTAATATAAGCTAAATATGTTTTTCAATATATATTGATAATAGAATATCAATAATTTGGGCGTGGAAGAAGAATAAACGAATTTCAGAAGACTACTCAAGAAGGAATCCAGAAGAAGGAATCCAGAAGGACACCCTATAAAGCATAAAGGAACAATATAGGGTGCGGTGAATGACATATCCCTGTGAAGAATAAAACTTTCGGTGGAAAGGCCCCGGCTTTAGCTAGCTCTCGTGAATCCACAGTAGCGAAGAGATAAGCAGGAGACACAGGCGACGCCATCCCTGGCCTCTATAAAAGGAGACGTTGGCCTTCACTCCGAGGAGGAAGACACCATTCAGAGCAAAGCTTTCAAGCGCGCTCTCACCCTCCATTCCACCGTTCTTAGTAGTAGTGACTTTAGCCTACCTTGCATAGTATATTGAAGCAAGGAGTGGTGTAATAACGCTGTGTAAGGTAAGAACAGCTTGCTTGTACCTACCTTCGGGTTTCCCGAAAGGGAAAACCGTATGTAAGCTTATCTGTTTAATATGAAGTAATTTTCCTTAAGTATTCCTGCACGTTTGTTCTAGACAAGTGTTTATGCTAAGGACCCTATAGGAGAAACCTCTTCGGTTTGTTCTCGTTTTTAGCCTGCATCTTGCATAGGCGTCTGGAGAATCGGTATCCGTAGAGAAGTGTTCCCTTCGGGTGGAACTGCCTGGGGAGACGATAAACTCTTAGCTAGAACAAGTGTGACTTGGAATATCTTGTTAAGTTGCTTCTAAAAAGATAGATAGGTGAGGCATACGGTAAGTACCGAGTAGGACTTTACATCATCCGAAACAAGCTTCTGAGGCTGTCTAAATAGGATTCGCCACCCTGCAAAGATCCTAAAGTTAAAATATCTCTCGAAGTGAACAGTATTGAACAGTAATTTAAACAGTAAACTGAATAGTGTTCTTGAATAGTAATCAGCCGAATAAACAGTAAACTGAATAGTATTCAGCCGAATAAATAGT
>chr08:11227503-11234349F
TGGTATCAGAGCCTGGTAATCATAGAGAAGCTAAATTCAGAAGCTAATATTGGAAAGGTAATTACTACTAAAGATAATTTGAATATAAGGTGTAGACTAAATCATATTGAAGACCATAGTTGGCACTCTAACAATAGTCAATTAAATTTAATTGTTGATCTGATATATAATTTTTATATAAATTGGGATAAAAAGCAGGTAGATTTAGAGCAAAAGTTAGAAGATATATATAAAGAACAAAAGCAATTTGTAGAACAATATTCTTTTCTTAATAATAAGCTAAATACTACATTAGAATTATTAGAAGATTATAAGATAAGGCAAAATAAAATTTCACAGAATAGTGATTATATTAAAGAATTACTAGACAAAATCAACTCTAGTAAAGGTAAGGAAATAGTTTTGGCTTCATCTGGCATAGTCTCGTCTTCACAAGCCATTAATTCTGAAAAATGGACATATCTAGGAGTCTCTTTAGAAGAATAGCAAGCAGAGATGATAACTGTTCTGATAAACAAAAAGGTAAAAATGAAGACATAGATGAGCTTGAAGATATTGCAGAAGTAGACAAACAGCTCGAAAGATATCAACGAGATACTTTAAGGGCAATAAGACCTCAACAAATATATTGCATGGGATTTTTTGAGAATAAAAATGGGTTATATAGAATATCTAGAGAAGTAGAGTTAAGCGTTTTAACAAAGCCAGTTGAGCTAAAAATTGTAGCCAAGGAATTTGAAAATGGATTAAAGTATTCAGGGTATAAATATATTCACCAAGGTATGTATATAATAGGAATCAAAGGTATGACAAGAAAGAAATTAGGAGCTAAAGTTCTAATAACTCTGTTAGATAAAAGGTGGGACACAATAGATAAAGCAGCATTAGGATTTTTAGAAGGTGACATGAATGAGAATATGTTGATAACATATATAGCCCCAGATCTAATGATGCCTATAAAAGAATTTATAGATAAAATGAGTTTTGGTTTTCAAACAAAGGGATACGAAGAATTTAAAGGAACAAATTTGCTAGTAAGCATAGAATTTATAGGAAGATTAACTAATAGAAGTGCCTCCAAATACAAAATAAATGTAAATGACGTGATTGAAAATATGCACTCTAAGGGAATAACTTTCATGAGCCCTCTAAAAATAAGTTCTGAAGAAAGGGCAGGAGAAGAATGGAAAATTAGTGATTTAATTGAAAGCAAAACTTTGAGTCAGCCTGAAAATTATATAAGTTATCAAAATAGTAAAGGAAATACCAGCATTAGATTTATAAATTACAAACCCAGAACCACAGATGACTTAGAAACAGAAGCATCTGATAGAAATATAATAGATAATAGAAGACATAGTGTTTCAGAGTTTATGGAAAAATTAGATCAAGAAAGTGAGATAAAATATTACGAAAATAAATTAAAGGAAATAAATGAAGAATATAATAACTCTATGAAGTGTGAGTGGCCTAAAATAAGAGATAAAGAACTTTATTTCTATAGAGAATTAGCTAGAGTAAAGAAAGTAAAGAAGAATGAAGATATGGCAGTAGAAATTTTTAAAAACCA---------------------AGAGCAAGATAAGCATGACAAAGAAGAGCAAAATCTTGGTAAAATTTTAAGTGAAGAAGAGCAATGGGCAGAGAATGAAAGATTATTTCTTGAAAGTTATGAAGAAGAAATTAATCTAATAAATGAGATGGAGAATATAGAAAATGAAATAGACAATACAGAACAATATAATGATTTTATAAACACATTAGATGAAGTAGGGTTACATAATCTTGATAATGCAATGGAAGCTATGGAAGTGGACTTAGGAACAGGAAAGAGAAAAAGATATGGAGAAGGTACTGTGAAAAACGAAGGAGAAAGAGAAAGACCAGCTAGGGCAGCAGGAAAATGGCCCCCTGATAGAGAAGAATTTTCATATAACTATATACCAGGTCAATATAGGCATATGGGTACAAAGAGAAGAGACTTTGAGAAGCCTGTTAAATTTCAAAACCAGAGGAGTGATGGTGCTATATTAAATTTAGCCGCACATGACCCTATTGATTGGCCTAATATTATTAGTATTTGGAAAGGTTTAATAGTTCAAAAATATATTCAAAACCAGCACAATATAGGAAGTAAAGTTGAAGATATGATAACCTACTTAGAAACATTCTTAGGTGAATCTGCTAAGATTCTATGGGAACAATGGGTTGAAAAGAATCCTAATAATTATGAAGAATTGAAAAGAGCTGGTAGCAATCCGCATAATTTTGCAAATGTAGTATCTAATATTATCATAGCTGAAGATCCGGAATTAGGTTATACAACTTTGCAAAATGAAAGGTTAAAAGAAATAGAAAAATTAACGTTAACAAGTTGGAAAGGCATAAAAGAATTCTCCCAACATTATTTATATAATGCTACAACTGCTAAACAAGGATATAACAGGGGAATAGTTGAACGTTACTTTAATAAACTACCTGACCCATTAGGTAGTATGATTTTTGAGGAATATAAAAAGGAAACTGAAGGAGCTGAAATTAATATTTCCCAAGCCATAACCTTCGTGTTCAAACAATTAAGAAAAATATGCACAGGAATACAAGCCCAAAGGTCAATGAAACATTCTGATTATAATTTTTGCAATAAAATAGTTCAAATACCCTTGTCATATGGAGAAGACAAGCCTAGAAGTAAAAGGATTTATAAACATCAAAATAGAAACCATAATAATATTAGAACAAAGAAAAGGTATTTCTTAAGAAGATCAGATAATAGAGCACCCTTCTTACATAAAAGAAATGTAAGAAGATATAATCCAAAGAAAACCTATGACAAAACATGCAGATGTTTTATATGCAACTCGCCAGATCATTTAAGTAGAACATGCCCAAATAAAGATCAAAAGAGATATTCTAGTAAATATGAAGAACAAGAGAGGGTTCTAATTATAGATAGCGTAAATGAAAATATATTAGTATGTGATGATGAAATAAAAGATGACGAGTCAATATATTCTATCATAGAAACAGACGAAGTTGAAACCATCAACGAAGAATATGAATCATCCGATGAAGAGTTAGATTTAATTGACGAATTAGCAGGTTTAAAGGTTGAAATGATGGATCAATTAAATTGTGAACATGATTGGATTAGAGGAAAGGGTGACTATAATATCAAATGTGCTTTTTGCATATATTATCCAAGTCAAGAAAATAGAGTGACTTGTAGTATATGTCTAAAACAAGCTTGTGCTGAATGTATAAAAGCAAATAAACAAAAATGGAGAAAAGAAATAGAATTAGAATCAGATGAAAAGACTTTATCTAGTAGAGTACGAGTGTTAGAAAATAGACTAAATAAACTAGAAGTAGAATTAGAGAACCTAAAAAATAATTGCGATATTAAGGCACTACCAGAGAATAAGGACATACAAAACACCGAATTTAAAGAGCAATTGATAACATTAAAAGACAGTAATACTGCTAAAATAATTCAACTAAGAGATGCCATAACTAATTTTGGAAATAAATATATAGTAAGATTGCCTTTCAAAGAAATATTAGGTATAAGAATCCCTGTTAAAATAAAATTGACACCCAAAGTATCTTATAAAATATTAGCACTAGTAGACACTGGGTGTACAAAGAATATTATTCATGACAAATATTTCACAAGATGTCCTGAAATAGTTCACACAATTGACGACAATAAGGCAGAAGTTTCCACAGACATGTCCGGAATAAAGAAAATTCATAATCAGTTAGCTTATAATATGGAGGTTTACATTAATGCAACTAAATATATAATAGATGAGATTACAATAAGAGATTTGTCAATGATTAATGATGACATGATAATTGGCCTAAGGTTCCTTCAACAATCAGTACAAACCACAGTAATACATGAGCAAGGAATTACTTTTATCCCATATCAAAATACTGTTCCATATATCTCAGAGGTACGAAAGCGTGGTGGAACCTCCCCCTCCCCAAAACCCGACAAACTCGACAACTTAGAAGTACCCAATCTTGAGTCTGAAGAAAGAATTAATGAATATGAGCTTAGTGAGAATATAGACAACTATTCTTTCTCATCATATCTTCCAAAATCTATAGAATTGCCAGGTAAGACATC--ATGGGAAGATAGATATT----------------TATTAAAAGCTACTAAAGATTTTGAATATAT---------------------------ATGCAGGGAAATGGCTTCACAGAAGTCTG----------AATGGCTCACAAATATGAGTTCATGGAGACTGCCCCAACTGCCCAGAGGCCATGGAGAACGATTTAATCACAATTTCAGA-----ATAACAGAGCTAC---AACATGGGTTATTAA----------------------------ATCTTTTGTGGCAAACAAAAA----------------------------------ACAAAAAAGAAAAAGCTC-------------------ATGCCTTAAATAGCT----------------------------------TGGCATATTATTTCAAAAATTT-----------CGTGCCCTCAGATCAAAAGATAACAGAAAA--------------------------------------------AAGGGCT----------------------------------------------AAAATGCAAGATATCCCTCATCATGAAGAAAGGT---TACTAGATTATCGCGAGGA---------------GAAATCCCGTGATGGCCA------------AGATAAACTTCTCATGGAAGTCGAACAA------TCTATGGCAACAGATAAGAATACCAAGGTATTCTCAGATAAGATTTTGATCTCAGCAGATCCTGCTTCGA----------------GCATGGTTGCTTTCCACATAAATATCAATAACCTATTGCAATCTTTCCCACATAATAAACCATCATCATCCACAAAAAGGCATGATATCATTCCCCAAACACCATACATACTGC--ATAATCATCC---TAATTTATTCCTTCCACAA-----TATATACTCCGGACTCAGCCAAAAGCACCATGTAGATCTTGTGCCTACA--------------AAGATTCTTGCAAAAAGAAACTTAAAAGCCAAAATC----------CCATGAG--------TACTACAT-------ACGAAAATCTCCAACCCAGATTAAGCTTC------------AAAACGGAACAAACTTTATCCTGCTTTGGGCAAGACA--------------TCCTCGATCTTGT----------TTGGCAAAAGTTTAAGGAGAGA--------CAAATGAAAATATTCCTTGGACTCCAAGATTATTTCTTTGATCTT------------TTAGAAGGG--------------------------------------AGAGAAAGAAACCCAGCCATACGAGTAATCATATATATGCTCCCTCTCTTAAGACTAGATAATCAGGCAATTTCTGACC------------------------CATCCTATA-GATTCCTGGT---------TCTCAAAGCTGAGATAAATCTTCAAAGATTCCGGAACCTA----CCCACATACAACCATGA----------AGAAATATCTCTCCAAACCATTATAGATCATGGTCTTGTGAATTCCATATATGCAACCCTCGATCAGATCCTTCAATCTGATTTAGGAAATGCTGTG-----------------AAAGATGTCTGCAGGAGACTTG-----GACATGGAAGA---TACAGGATTATCTTCTCCTCAATA------CCACCAA--------AATTCACACCACCTGTTCGTCCAGCAATTCATTATATATATATCA--TGAAGGGACAAT--------------TTAATTTTCAAGAAGACGGTCTTAGCAAACT-------------ATCGGATGAAGA----GGAAGAAATATATACAACAGTTGCTAATCATGAAA---------------ATTGG----AGATTATTTTCTGAAGC--------------------------TGCAGAAA--TTGAAGAAGCTATCACCACAGATTATGAATATC-----AGCTGGTTTTCCAAAACAAGATCACAAGGATTTTTATCAGCAAATTCTACAACCAAAGTTATGAATACTTCAAGGGAGCAGGGCGCATAATTAAACCGGATT-------TTGGAAATGAATGCTCCAAGAAAAGTTACTACAGAAACCTGGCTCAGTGGTTTCAGAAAACAGAGCCATCAGAGATTGACACGGTACAATCAGCACCAATGATAATCAACGAAGATAATGAATAAAGATTTTGTCATCCCCGACAAAGATCACGATTCAAGATAAGGAATCTATA----CTATTCCAGAT-----AAGTATGGATCTTGGTGGCCATGGGCAACCAGATGAATAAATTAATATAAGCTAAATATGTTTTTCAATATATATTGATAATAGAATATCAATAATTTGGGCGTGGAAGAAGAATAAACGAATTTCAGAAGACTACTCAAGAAGGAATCCAGAAGAAGGAATCCAGAAGGACACCCTATAAAGCATAAAGGAACAATATAGGGTGCGGTGAATGACATATCCCTGTGAAGAATAAAACTTTCGGTGGAAAGGCCCCGGCTTTAGCTAGCTCTCGTGAATCCACAGTAGCGAAGAGATAAGCAGGAGACACAGGCGACGCCATCCCTGGCCTCTATAAAAGGAGACGTTGGCCTTCACTCCGAGGAGGAAGACACCATTCAGAGCAAAGCTTTCAAGCGCGCTCTCACCCTCCATTCCACCGTTCTTAGTAGTAGTGACTTTAGCCTACCTTGCATAGTATATTGAAGCAAGGAGTTGTGTAATAACGCTGTGTAAGGTAAGAACAGCTTGCTTGTACCTACCTTCGGGTTTCCCGAAAGGGAAAACCGTATGTAAGCTTATCTGTTTAATATGAAGTAATTTTCCTTAAGTATTCCTGCACGTTTGTTCTAGACAAGTGTTTATGCTAAGGACCCTATAGGAGAAACCTCTTCGGTTTGTTCTCGTTTTTAGCCTGCATCTTGCATAGGCGTCTGGAGAATCGGTATCCGTAGAGAAGTGTTCCCTTCGGGTGGAACTGCCTGGGGAGACGATAAACTCTTAGCTAGAACAAGTGTGACTTGGAATATCTTTTTAAGTTGCTTCTAAAAAGACAGATAGGTGAGGCATACGGTGAGTACCGAGTAGGACTTTATATCATCTGAAACAAGCTTCTGAGGCTGTCTAAATAGGATTCGCCACCCTGCAAAGATCCTAAAGTTAAAATATCTCTCGAAGTGAACAGTAGTGAACAGTAATT--------------------------------------------TAAACAGTAAACTGAATAGTATTCAGCCGAATAAATAGT
>chr08:11187207-11194062F
TGGTATCAGAGCC-AGTCATCATAGAGAAATCAAATTCAGAAGCTAATATTGGAAAGGTAATTACTACTAAAGATAATTTGAATATAAGGTGTAGACTAAATCATATTGAAGACCATAGTTGGCACTCTAACAATAGTCAATTAAATTTAATTGTTGATCTGATATATAATTTTTATATAAATTGGGATAAAAAGCAGGTAGATTTAGAGCAAAAGTTAGAAGATATATATAAAGAACAAAAGCAATTTGTAGAACAATATTCTTTTCTTAATAATAAGCTAAATACTACATTAGAATTATTAGAAGATTATAAGATAAGGCAAAATAAAATTTCACAGAATAGTGATTATATTAAAGAATTACTAGACAAAATCAACTCTAGTAAAGGTAAGGAAATAGTTTTGGCTTCAACAGGCATAATTACCTCGTCTCAAGCTATTAATTCAGAAAAATGGACCTATCTAGGAGTTTGTTTAGAAGAATAGCAAGCAGAGACGATAATTGTATTGATAAACAAAAAGGTAAAAATGAAGACATAGATGAGCTTGAGGATATTGCAGAAGTAGACAAACAGCTCGAAAGATATCAACGAGATACTTTAAGGGCAATAAGACCTCAACAAATATATTGCATGGGATTTTTTGAGAATAAAAATGGGTTATACAGAATATCTAGAGAAGTAGAGTTAAGCGTTTTAACAAAGCCAGTTGAGTTAAAAATTGTAGCCAAGGAATTTGAAAATGGATTAAAGTATTCAGGGTATAAATATATTCACCAAGGTATGTATATAATAGGAATCAAAGGTATGACAAGAAAGAAATTAGGAGCTAAAGTTCTAATAACTCTGTTAGATAAAAGGTGGGACACAATAGATAAAGCAGCATTAGGATTTTTAGAAGGAGACATGAATGAGAATATGTTGATAACATATATAGCCCCAGATCTAATGATGCCTATAAAAGAATTTATAGATAAAATGAGTTTTGGTTTTCAAACAAAGGGATACGAGGAATTTAAAGGAACAAATTTGCTAGTAAGCATAGAATTTATAGGAAGATTAACTAATAGAAGTGCCTCCAAATACAAAATAAATGTAAATGACGTGATTGAAAATATGCACTCTAAGGGAATAACTTTCATGAGCCCTTTAAAAATAAGTTCTGAAGAAAGGGCAGGAGAAGAATGGAAAATTAGTGATTTAATTGAAAGCAAAACTTTGAGTCAACCTGAAAATTATATAAGTTATCAAAATAGTAAAGGAAATACCAGCATTAGATTTATAAATTACAAACCCAGAACCACAGATGACTTAGAAACAGAAGCATCTGATAGAAATATAATAGATAATAGAAGACATAGTGTTTCAGAGTTTATGGAAAAATTAGATCAAGAAAGTGAGATAAAATATTACGAAAATAAATTAAAGGAAATAAATGAAGAATATAATAACTCTATGAAGTGTGAGTGGCCTAAAATAAGAGATAAAGAACTTTATTTCTATAGAGAATTAGCTAGAGTAAAGAAAGTAAAGAAGAACGAAGATATGGCAGTAGAAATTTTTAAAAACCA---------------------AGAGCAAGATAAGCATGACAAAGAAGAGCAAAATCTTGGTAAAATTTTAAGTGAAGAAGAGCAATGGGCAGAGAATGAAAGATTATTTCTTGAAAGTTATGAAGAAGAAATTAATCTAATAAATGAGATGGAGAATATAGAAAATGAAATAGACAATACAGAACAATATAATGATTTTATAAACACATTAGATGAAGTAGGGTTACATAATCTTGATAATGCAATGGAAGCTATGGAAGTGGACTTAGGAACAGGAAAGAGAAAAAGATATGGAGAAGGTACTGTGAAAAACGAAGGAGAAAGAGAAAGACCAGCTAGGGCAGCAGGAAAATGGCCCCCTGATAGAGAAGAATTTTCATATAACTATATACCAGGTCAATATAGGCATATGGGTACAAAGAGAAGAGACTTTGAGAAGCCTGTTAAATTTCAAAACCAGAGGAGTGATGGTGCTATATTAAATTTAGCCGCACATGACCCTATTGATTGGCCTAATATTATTAGTATTTGGAAAGGTTTAATAGTTCAAAAATATATTCAAAACCAGCACAATATAGGAAGTAAAGTTGAAGATATGATAACCTACTTAGAAACATTCTTAGGTGAATCTGCTAAGATTCTATGGGAACAATGGGTTGAAAAGAATCCTAATAATTATGAAGAATTGAAAAGAGCTGGTAGCAATCCGCATAATTTTGCAAATGTTATATCTAACATTATTATAGCTGAAGATCCGGAATTAGGTTATACAACTTTGCAAAATGAAAGGTTAAAAGAAATAGAAAAATTAACGTTAACAAGTTGGAAAGGCATAAAAGAATTCTCCCAACATTATTTATATAATGCTACAACTGCTAAACAAGGATATAACAGGGGAATAGTTGAACGTTACTTTAATAAACTACCTGACCCATTAGGTAGTATGATTTTTGAGGAATATAAAAAGGAAACTGAAGGAGCTGAAATTAATATTTCCCAAGCCATAACCTTCGTGTTCAAACAATTAAGAAAAATATGCACAGGAATACAAGCCCAAAGGTCAATGAAACATTCTGATTATAATTTTTGCAATAAAATAGTTCAAATACCCTTGTCATATGGAGAAGACAAGCCTAGAAGTAAAAGGATTTATAAACATCAAAATAGAAACCATAATAATATTAGAACAAAGAAAAGGTATTTCTTAAGAAGATCAGATAATAGAGCACCCTTCTTACATAAAAGAAATGTAAGAAGATATAATCCAAAGAAAACCTATGACAAAACATGCAGATGTTTTATATGCAACTCGCCAGATCATTTAAGTAGAACATGCCCAAATAAAGATCAAAAGAGATATTCTAGTAAATATGAAGAACAAGAGAGGGTTCTAATTATAGATAGCGTAAATGAAAATATATTAGTATGTGATGATGAAATAAAAGATGACGAGTCAATATATTCTATCATAGAAACAGACGAAGTTGAAACCATCAACGAAGAATATGAATCATCCGATGAAGAGTTAGATTTAATTGACGAATTAGCAGGTTTAAAGGTTGAAATGATGGATCAATTAAATTGTGAACATGATTGGATTAGAGGAAAGGGTGACTATAATATCAAATGTGCTTTTTGCATATATTATCCAAGTCAAGAAAATAGAGTGACTTGTAGTATATGTCTAAAACAAGCTTGTGCTGAATGTATAAAAGCAAATAAACAAAAATGGAGAAAAGAAATAGAATTAGAATCAGATGAAAAGACTTTATCTAGTAGAGTACGAGTGTTAGAAAATAGACTAAATAAACTAGAAGTAGAATTAGAGAACCTAAAAAATAATTGCGATATTAAGGCACTACCAGAGAATAAGGACATACAAAACACCGAATTTAAAGAGCAATTGATAACATTAAAAGACAGTAATACTGCTAAAATAATTCAACTAAGAGATGCCATAACTAATTTTGGAAATAAATATATAGTAAGATTGCCTTTCAAAGAAATATTAGGTATAAGAATCCCTGTTAAAATAAAATTGACACCCAAAGTATCTTATAAAATATTAGCACTAGTAGACACTGGGTGTACAAAGAATATTATTCATGACAAATATTTCACAAGATGTCCTGAAATAGTTCACACAATTGACGACAATAAGGCAGAAGTTTCCACAGACATGTCCGGAATAAAGAAAATTCATAATCAGTTAGCTTATAATATGGAGGTTTACATTAATGCAACTAAATATATAATAGATGAGATTACAATAAGAGATTTGTCAATGATTAATGATGACATGATAATTGGCCTAAGGTTCCTTCAACAATCAGTACAAATCACAGTAATACATGAGCAAGGAATTACTTTTATCCCATATCAAAATACTGTTCCATATATCTCAGAGGTACGAAAGCGTGGTGGAACCTCCCCCTCCCCAAAACCCGACAAACTCGACAACTTAGAAGTACCCAATCTTGAGTCTGAAGAAAGAATTAATGAATATGAGCTTAGTGAGAATATAGACAACTATTCTTTCTCATCATATCTTCCAAAATCTATAGAATTGCCAGGTAAGACATC--ATGGGAAGATAGATATT----------------TATTAAAAGCTACTAAAGATTTTGAATATAT---------------------------ATGCAGGGAAATGGCTTCACAGAAGTCTG----------AATGGCTCACAAATATGAGTTCATGGAGACTGCCCCAACTGCCCAGAGGCCATGGAGAACGATTTAATCACAATTTCAGA-----ATAACAGAGCTAC---AACAAGGGTTATTAA----------------------------ATCTTTTGTGGCAAACAAAAA----------------------------------ACAAAAAAGAAAAAGCTC-------------------ATGCCTTAAATGGCT----------------------------------TGGCATATTATTTCAAAAATTT-----------CGTGCCCTCAGATCAAAAGATAACAGAAAA--------------------------------------------AAGGGCT----------------------------------------------AAAATGCAAGATATCCCTCATCATGAAGAAAGGT---TACTAGATTATCGCGAGGA---------------GAAATCCCGTGATGGCCA------------AGATAAACTTCTCATGGAAGTCGAACAA------TCTATGGCAACAGATAAGAATACCAAGGTATTCTCAGATAAGATTTTGATCTCAGCAGATCCTGCTTCGA----------------GCATGGTTGCTTTCCACATAAATATCAATAACCTATTGCAATCTTTCCCACATAATAAACCATCATCATCCACAAAAAGGCATGATATCATTCCCCAAACACCATACATACTGC--ATAATCATCC---TAATTTATTCCTTCCACAA-----TATATACTCCGGACTCAGCCAAAAGCACCATGTAGATCTTGTGCCTACA--------------AAGATTCTTGCAAAAAGAAACTTAAAAGCCAAAATC----------CCATGAG--------TACTACAT-------ACGAAAATCTCCAACCCAGATTAAGCTTC------------AAAACGGAACAAACTTTATCCTGCTTTGGGCAAGACA--------------TCCTCGATCTTGT----------TTGGCAAAAGTTTAAGGAGAGA--------CAAATGAAAATATTCCTTGGACTCCAAGATTATTTCTTTGATCTT------------TTAGAAGGG--------------------------------------AGAGAAAGAAACCCAGCCATACGAGTAATCATATATATGCTCCCTCTCTTAAGACTAGATAATCAGGCAATTTCTGACC------------------------CATCCTATA-GATTCCTGGT---------TCTCAAAGCTGAGATAAATCTTCAAAGATTCCGGAACCTA----CCCACATACAACCATGA----------AGAAATATCTCTCCAAACCATTATAGATCATGGTCTTGTGAATTCCATATATGCAACCCTCGATCAGATCCTTCAATCTGATTTAGGAAATGCTGTG-----------------AAAGATGTCTGCAGGAGACTTG-----GACATGGAAGA---TACAGGATTATCTTCTCCTCAATA------CCACCAA--------AATTCACACCACCTGTTCGTCCAGCAATTCATTATATATATATCA--TGAAGGGACAAT--------------TTAATTTTCAAGAAGACGGTCTTAGCAAACT-------------ATCGGATGAAGA----GGAAGAAATATATACAACAGTTGCTAATCATGAAA---------------ATTGG----AGATTATTTTCTGAAGC--------------------------TGCAGAAA--TTGAAGAAGCTATCACCACAGATTATGAATATC-----AGCTGGTTTTCCAAAACAAGATCACAAGGATTTTTATCAGCAAATTCTACAACCCAAGTTATGAATACTTCAAGGGAGCAGGGCGCATAATTAAACCGGATT-------TTGGAAATGAATGCTCCAAGAAAAGTTACTACAGAAACCTGGCTCAGTGGTTTCAGAAAACAGAGCCATCAGAGATTGACACGGTACAATCAGCACCAATGATAATCAACGAAGATAATGAATAAAGATTTTGTCATCCCCGACAAAGATCACTATTCAAGATAAGGAATCTACA----CTATT-CAGAT-----AAGTATGGATCTTGGTGGTCATGGGCAGCCAGATGAATAGAATTCTTTAAGCTAAATATGTTTTTCAATATATATTGATAATAGAATATCAATAATTTGGGCGTGGAAGAAGAATAAACGAATTTCAGAAGACTACTCAAGAAGGAATCCAGAAGAAGGAATCCAGAAGGACACCCTATAAAGCATAAAGGAACAATATAGGGTGCGGTGAATGACATATCCCTGTGAAGAATAAAACTTTCGGTGGAAAGGCCCCGGCTTTAGCTAGCTCTCGTGAATCCACAGTAGCGAAGAGATAAGCAGGAGACACAGGCGACGCCATCCCTGGCCTCTATAAAAGGAGACGTTGGCCTTCACTCCGAGGAGGAAGACACCATTCAGAGCAAAGCTTTCAAGCGCGCTCTCACCCTCCATTCCACCGTTCTTAGTAGTAGTGACTTTAGCCTACCTTGCATAGTATATTGAAGCAAGGAGTGGTGTAATAACGCTGTGTAAGGTAAGAACAGCTTGCTTGTACCTACCTTCGGGTTTCCCGAAAGGGAAAACCGTATGTAAGCTTATCTGTTTAATATGAAGTAATTTTCCTTAAGTATTCCTGCACGTTTGTTCTAGACAAGTGTTTATGCTAAGGACCCTATAGGAGAAACCTCTTCGGTTTGTTCTCGTTTTTAGCCTGCATCCTGCATAGGCGTCTGGAGAACCGGTATCCGTAGAGAAGTGTTCCCTTCGGGTGGAACTGTCTGGGGAGACGATAAACTCTTAGCTAGAACAAGTGTGACTTGGAATATCTTTTTAAGTTGCTTCTAAAAAGACAGATAGGTGAGGCATACGGTAAGTACCGAGTAGGACTTTACATCATCCGAAACAAGCTTCTGAGGCTGTCTAAATAGGATTCGCCACCCTGCAAAGATCCTAAAGTTAAAATATCTCTCGAAGTGAACAGTACTGAACAGTAATT--------------------------------------------TAAACAGTAAACTGAATAGTATTCAGCCGAATAAATAGT
>chr09:14493662-14495268F
-------------------------------------------------------------------------------------------------------------------------------------------------------------------------------------------------------------------------------------------------------------------------------------------------------------------------------------------------------------------------------------------------------------------------------------------------------------------------------------------------------------------------------------------------------------------------------------------------------------------------------------------------------------------------------------------------------------------------------------------------------------------------------------------------------------------------------------------------------------------------------------------------------------------------------------------------------------------------------------------------------------------------------------------------------------------------------------------------------------------------------------------------------------------------------------------------------------------------------------------------------------------------------------------------------------------------------------------------------------------------------------------------------------------------------------------------------------------------------------------------------------------------------------------------------------------------------------------------------------------------------------------------------------------------------------------------------------------------------------------------------------------------------------------------------------------------------------------------------------------------------------------------------------------------------------------------------------------------------------------------------------------------------------------------------------------------------------------------------------------------------------------------------------------------------------------------------------------------------------------------------------------------------------------------------------------------------------------------------------------------------------------------------------------------------------------------------------------------------------------------------------------------------------------------------------------------------------------------------------------------------------------------------------------------------------------------------------------------------------------------------------------------------------------------------------------------------------------------------------------------------------------------------------------------------------------------------------------------------------------------------------------------------------------------------------------------------------------------------------------------------------------------------------------------------------------------------------------------------------------------------------------------------------------------------------------------------------------------------------------------------------------------------------------------------------------------------------------------------------------------------------------------------------------------------------------------------------------------------------------------------------------------------------------------------------------------------------------------------------------------------------------------------------------------------------------------------------------------------------------------------------------------------------------------------------------------------------------------------------------------------------------------------------------------------------------------------------------------------------------------------------------------------------------------------------------------------------------------------------------------------------------------------------------------------------------------------------------------------------------------------------------------------------------------------------------------------------------------------------------------------------------------------------------------------------------------------------------------------------------------------------------------------------------------------------------------------------------------------------------------------------------------------------------------------------------------------------------------------------------------------------------------------------------------------------------------------------------------------------------------------------------------------------------------------------------------------------------------------------------------------------------------------------------------------------------------------------------------------------------------------------------------------------------------------------------------------------------------------------------------------------------------------------------------------------------------------------------------------------------------------------------------------------------------------------------------------------------------------------------------------------------------------------------------------------------------------------------------------------------------------------------------------------------------------------------------------------------------------------------------------------------------------------------------------------------------------------------------------------------------------------------------------------------------------------------CTTG-----GACATGGAAGA---TACAGGATTATCTTCTCCTCAATA------CCACCAA--------AATTCACACCACCTGTTCGTCCAGCAATTCATTATATATATATCA--TGAAGGGACAAT--------------TTAATTTTCAAGAAGACGGTCTTAGCAAACT-------------ATCGGATGAAGA----GGAAGAAATATATACAACAGTTGCTAATCATGAAA---------------ATTGG----AGATTATTTTCTGAAGC--------------------------TGCAGAAA--TTGAAGAAGCTATCACCACAGATTATGAATATC-----AGCTGGTTTTCCAAAACAAGATCACAAGGATTTTTATCAGCAAATTCTACAACCAAAGTTATGAATACTTCAAGGGAGCAGGGCGCATAATTAAACCGGATT-------TTGGAAATGAATGCTCCAAGAAAAGTTACTACAGAAGCCTGGCTCAGTGGTTTCAGAAAACAGAACCATCAGAGATTGACACGGTACAATCAGCACCAATGATAATCAACGAAGATAATGAATAAAGATCTTGTCATCCCCGACAAAGATCACTATTCAAGATCAGGAATCTACA----CTATTCCAGAT-----AACAATGGATCTTGGTGGCCATGGGCAGCCAGATGAATAGAATTCTTTAAGCTAAATATGTTTTTCAATATATATTGATAATAGAATATCAATAATTTGGGCGTGGAAGAAGAATAAACGAATTTCAGAAGACTACTCAAGAAGGAATCCAGAAGAAGGAATCCAGAAAGACACCCTATAAAGCATAAAGGAACAATATAGGGTGCGGTGAATGACATATCCCTGTGAAGAATAAAACTTTCGGTGGAAAGGCCTCGACTTTAGCTAGCTCTCGTGAATCCACAGTAGCGAAGAGATAAGCAGGAGACACAGGCGAAGCCATCTCTGGCCTCTATAAAAGGAGACGTTGGCCTTCACTCCGAAGACGAAGACACCATTCAGAGCAAAGCTTCCAAGCGCGCTCTCACCCTCCATTCCACCGTTCTTAGTAGTAGTGACTTTAGCCTACCTTGCATAGTATATTGAAGCAAGGAGTTGTGTTATAACGCTGTGTAAGGTAAGAACAGCTTGCTTGTACCTACCTTCGGGTTTCCCGAAAGGGAAAACCGTATGTAAGCTTATCTGTTTAATATGAAGTAATTTTCCTTAAGTATTCCTGCACGTTTGTTCTAGACAAGTGTTTATGCTAAGGACCCTATAGGAGAAACCTCTTCGGTTTGTTCTCGTTTTTAGCCTGCATCTTGCATAGGCGTCTGGAGAATCGGTATCCGTAGAGAAGTGTTCCCTTCGGGTGGAACTGCCTGGGGAGACGATAAACTCTTAGCTAGAACAAGTGTGGCTTGGAATATCTTTTTAAGTTGCTTCTAAAAAGACAGATAGGTGAGGCATACGGTGAGTACCGAGTAGGACTTTATATCATCTGAAGCAAGCTTCTGAGGCTGTCTAAATAGGATTCGCCACCCTGCAAAGATCCTAAAGTTAAAATATCTCTCGAAGTGAACAGTATTGAACAGTAATTTAAACAGTAAACTGAATAGTGTTTTTGAATAGTAATCAGCCGAATAAACAGTAAACTGAATAGTATTCAGCCGAATAAATAGT
>chr10:22712881-22719732R
TGGTATCAGAGCCTGGTAATCATAGAGAAGCTAAATTTAGAAGCTAATATTGGAAAGTTAATAAATACCAAAGATAATATCGACATAAGGTGTAGACTAAGCCATACTGAAGAACATAGTTGGCACTCTAATAATAGCCAACTAAATTTAATTGTAGATTTAATATATAATTTCTATATAAATTGGAGTAAGAGACAAGAAGATTTAGAGCAAAAGTTAGAAGATATATATAAAGAACAAAAGCAATTTGTAGAACAATATTCTTTTCTTAATAATAAGCTAAATACTACATTAGAATTATTAGAAGATTATAAGATAAGGCAAAATAAAATTTCACAGAATAGTGATTATATTAAAGAATTACTAGACAAAATCAACTCTAGTAAAGGTAAGGAAATAGTTTTGGCTTCATCTGGCATAGTCTCATCTTCACAAGCCATTAATTCTGAAAAATGGACATATCTAGGAGTCTCTTTAGAAGAATAGCAAGCAGAGATGATAACTGTTCTGATAAACAAAAAGGCAAATATGATGACATAGATGAGCTGAAAGATGTTGCACAAGTAGATAAGCAGCTCGAAAGATATCAACGAGATACTTTAAGGGCAATAAGGCCTCAACAAGTATACTGCATGGGATTTTTTGAGAATAAGAATGGGCTTTATAGAATATCTAGAGAAGTAGAATTAAGTGTTCTAACAAAGCCAGTAGAATTAAAAATAGTAGCTAAAGAATTTGAAAATAGTTTAAAATATTCAGGATATAAGTATATTCACCAAGGTATGTACATAATAGGAATCAAAGGAATGACAAGAAAGAAATTAGGAGCTAAAGTGCTAATAACCTTATTAGATAAAAGATGGGACACAATAAACAAAGCATCTTTAGGCTATCTAGAAGGAGATATGAATGAAAATATGTTGATAACCTATATAGCGCCTGATTTAATGATGCCTGTAAATGAATTCATAGATAAAATGAGTTTTGGTTTCCAAACAAAAGGATACGAAGAGTTTAAGGGAACAAATTTATTAATAAGTATAGAATTTATAGGAAGATTGACTAATAGAAGTGCCTCCAAATACAAAATCAATGTAAATGATGTGATAGAAAAAATGCATTCTAAAGGAATAAAATTCATGAGCCCTTTAATAATAGACTCTGAAGAAAGAGCAGGAGAAAAATGGCCAATTAGTGAATTTATAAAAAATAAAACCTTGAGTCAGCCTGAAAACTTCATAAGTTACCAAGACAGCAAAGGGAATGTTAGTATTAGATTTACAAATTATAAAACCAGAGCTTCGGATGATTTGGATGCAGAATCATCTGACAGAGATATTATAGATAACAGAAGACATAGTATATCTGAATTGATGGAAAAATTAGACCATGAAAGTGAAATAAAATATTATGAAGATAAATTAAGAGATATAGCAGATGAATATAATAACTCTATGAAAAGTGAGTGGCCTAAAATTAGAGACAAGGAACTTTATTTCTATAGAGAACTATCCAGGATTAAGAAACAAAAAAAAGAGAAAAGCTTGGTCATAGAAATCCCCAGAACCCAGGAAATTAAAATAGAACAAATAAAGTCAGAAGAACCAAGAGAAGAAATCCAAAAGTTAGATAAGGTATTAAGTGAGGAAGAGCAATGGGAAGTAAATGAGAAATTATTACTAGAGAGTTATGAAGAAGAAAACAACCTGATAGAGGAAATAGAGAATATAGAA---GAAGAAGATAATGCAGAACAATATAATGATTTTATAGACTCATTGGATGAGGAAGGTTTGCATAATCTAGATAATGCAATGGAAGCTATGGAAGTAGATTTGGGAACAGGAAAAAGGAAAAGATACGGAGAGGGTTCTGTAAAAAATGAAGGAGAAAGAGAAAGACCAGCCAGGGCAGCAGGAAGATGGCCTCCAGAAAAAGAAGAATATTCATATCATTATATCCCAGGACAGTATAGGCACATGGGCACTAAAAGAAGAGATTTTGAGAAACCAATAAAATTTCAAAATCAAAAAAGTGATGGGGCTATACTAAATCTAGCAGCACATGATCCCATAGACTGGCCAAATATCATTAGTATTTGGAAGGGGTTAATAGTTCAAAAATACATACAAAATCAGCATAATATAGGGAATAAGGTGGAGGATATGATAACTTATTTAGAAACATTTTTGGGTGAATCTGCTAAAGTCCTATGGGAACAATGGGTTGAAAAGAATCCTAATAACTATGAAGAGCTAAAAAGAGCAGGAAGTAATCCTCACAACTTTGAAAATATAGTATCTAATATTATCATAGCTGAAGACCCAGAATTAGGATATACAACCCTGCAAAATGAAAGATTAAAAGAAATAGAAAAATTAACTTTAACAAGCTGGAAAGGTATAAAGGAATTTTCTCAACATTATCTATATAATGCAACAACTGCTAAGCAAGGATACAATAAGGGAATAGTTGAGCGATATTTTAATAAACTACCTGACCCATTAGGTAGTATGATTTTTGAGGAATATAAAAAGGAAACTGAAGGAGCTGAAATTAATATTTCCCAAGCCATAACCTTCGTGTTCAAACAATTAAGAAAAATATGCACAGGAATACAAGCCCAAAGGTCAATGAAACATTCTGATTATAATTTTTGCAATAAAATAATACAAATACCTTTATCATATGGAGAAGATAGGCCTAGAAATAAAAGAAACCATAGATATCAAAGTAGAAATAGCAATAATATAAAGACAAAGAAAAGGTACTTCTTAAGAAGATCAGATAATAGAGCACCTTTCTTACATAAACGAAATGTAAGAAGATATAACCCAAAGAAAACTTATGATAAGACATGCAGATGTTTCATATGTAATTCACCAGATCATTTAAGTAGAACTTGCCCAAATAAAGATCAAAAAAGATATTCTAGTACATATGAAGAACAAGAGAGAGTTTTAATTATAGATAGCGTAAATGAAAATATATTAGTATGTGATGATGAAATAAAAGATGACGAATCAATATATTCTATCATAGAAACAGATGAAATTGAAAACACCAATGAAGAGTATGAATCAACCGATGAAGAGTTAGATTTAATTGACGAACTAGCCGGTTTAAAAATAGAATTGATGGATCAGTTAAATTGTGAACATGATTGGATTAGAGGAAAAGGAGATTATAACATTAAATGTGCTTTTTGCATCTATTACCCAAGCCAAGATAATAGAGTAACCTGTAGTATATGCTTAAAACAAGCTTGTGCTGAATGTATAAAAGCAAATAAACAAAAATGGAGAAAAGAGATAGAATTAGAATCAGATGAAAGGATATTATCTAGTAGAGTACGAGTTTTAGAAAACAGAATAAATAAACTAGAAGTGGAACTAGAGAATCTAAAAATTAACTATGATATTAAGGCATTACCAGAAAATAAGGATATACAAAATACCGAATTTAAAGAGCAAGTGATAACATTAAAAGACAGTAATACTGCTAAAATAATTCAACTAAAAGATGCCATAACTAATTTTGGAAATAAATATATAGTAAAACTGCCTTTCAAAGAAATTTTGGGAATAAGAATACCGGTAAAAGTAAAACTATCACCCAAGGTATCATATAAAATTCTAGCACTAGTAGACACTGGGTGTACAAAAAATATTATTCATGATAAGTACTTCATAAAATGTCCAGAAATAGTTCATACAATTGATGATAATAAGGCAGAAGTCTCTACAGACATGTCCGGAATAAAGAAAATTCATAATCAGCTAGCTCATAATGTTGAAGTATACATTAATGGAACTAAATATATAATAGATGAGATTACAATAAGAAACTTATCCATGATAAGTGATGACATGATAATTGGCCTAAGGTTTTTACAACAATCGGTACAAACCACAGTAATACATGAGCAAGGAATTACTTTTATCCCATATCAAAACAATGTGCCATATATCTCAGAGGTACGAAAGCGTGGTGGAGCCAGAAT---------------CAAACCCGACAACCTTGAAGCACTTAATCTTGAGTCTGAAGAAAGAATTAATGAATATGAGCTTAGTGAGAATATAGACAACTATTCTTTCTCATCATATCTTCCAAAATCTATGGAATTGCCAGGTAAGACATC--ATGGGAAGATAGATATT----------------TATTAAAAGCTACTAAAGATTTTGAATATAT---------------------------ATGCAGGGAAATGGCTTCACAGAAGTCTG----------AATGGCTCACAAATATGAGTTCATGGAGACTGCCCCAACTGCCTAGAGGCCATGGAGAACGATTTAATCACAATTTCAGA-----ATAACAGAGCTAC---AACAAGGGTTATTAA----------------------------ACCTCTTGTGGCAAACAAAAA----------------------------------ACAAAAAAGAAAAAGCTC-------------------ATGCCTTAAATGGCC----------------------------------TGGCATATTATTTCAAAAATTT-----------CGTGCCCTCAGATCAAAAGATAACAGAAAA--------------------------------------------AAGGGCT----------------------------------------------AAAATACAAGATATCCCTCATCATGAGGAAAGGT---TACTAGATTATCGCGAGGA---------------GAAATCCCGTGATGGCCA------------AGATAAACTTCCCATGGAAGTTGAACAA------TCTATGGCAACAGATAAGAATACCAAGGTATTCTCAGATAAGATTTTGATCTCAGCAGATCCTGCTTCGA----------------GCATGGTTGCTTTCCACATAAATATCAATAACCTATTGCAATCTTTTCCACATAATAAACCATCATCATCCACAAAAAGGCATGATACCATTCCCCAAACACCATACATACTGC--ATAATCATCC---TAATTTATTCCTTCCACAA-----TATATACTCCGGACCCAGCCAAAAGCACCATGTAGATCTTGTGCCTACA--------------AAGATTCTTGCAAAAAGAAACTTAAAAGCCAAAATC----------CCATGAG--------TACTACAT-------ACGAAAATCTCCAACCCAGATTAAGCTTC------------AAAACGGAACAAACTTTATCCTGCTTTGGGCAAGACA--------------TCCTCGATCTTGT----------TTGGCAAAAGTTTAAGGAGAGA--------CAAATGAAAATATTCCTTGGACTCCAAGATTATTTCTTTGATCTC------------TTAGAAGGG--------------------------------------AGAGAAAGAAACCCAGCCATACGAGTAATCATATATATGCTCCCTCTCTTAAGACTAGATGATCAGGCAATTTCTGACC------------------------CATCCTATA-GATTCCTGGT---------TCTCAAAGCTGAGATAAATCTTCAAAGATTCCGGAACCTA----CCCACATACAACCATGA----------AGAAATATCTCTCCAAACCATTATAGATCATGGTCTTGTGAATTCCATATATGCAACCCTCGATCAGATCCTTCAATCTGATTTAGGAAACGCTGTG-----------------AAAGATGTATGCAGGAGACTTG-----GACATGGAAGA---TACAGGATTATCTTCTCCTCAATA------CCACCAA--------AATTCACACCACCTGTTCGTCCAGCAATTCATTATATATATATCA--TGAAGGGACAAT--------------TTAATTTTCAAGAAGACGGTCCTAGCAAACT-------------ATCGGATGAAGA----GGAAGAAATATATACAACAGTTGCTAATCATGAAA---------------ATTGG----AGATTATTTTCTGAAGC--------------------------TGCAGAAA--TTGAAGAAGCTATCACCACAGATTATGAATATC-----AGCTGGTTTTCCAAAACAAGATCACAAGGATTTTTATCAGCAAATTCTACAACCAAAGTTATGAATACTTCAAGGGAGCAGGGCGCATAATTAAACCGGATT-------TTGGAAATGAATGCTCCAAGAAAAGTTACTACAGAAGCCTGGCTCAGTGGTTTCAGAAAACAGAGCCATCAGAGATTGACACGGTGCAATCAGCACCAATGATAATCAACGAAGATAATGAATAAAGATCTTGTCATCCCCGACAAAGATCACTATTCAAGATAAGGAATCTACA----CTATTCCAGAT-----AAGTATGGATCTTGGTGGTCATGGGCAGCCAGATGAATAGAATTCTTTAAGCTAAATATGTTTTTCAATATATATTGATAATAGAATATCAATAATTTGGGCGTGGAAGAAGAAAAAACGAATTTCAGAAGACTACTCAAGGAGGAATCCAGAAGAAGGAATCCAGAAGGACACCCTAT-AAGCATAAAGGAACAATATAGGGTGCGGTGAATGACATATCACTGTGAAGAGTAAAACTTTCGGTGAAAAGGCCTCGACTTTAGCCAGCTCCCGTGAAGATACAGTAGCGAAGAGATAAGCAGGAGGCACAGGCGACGCCATCCCTGGCCTCTATAAAAGGAGACGTTGGCCTTCACTCCGGAGACGAAGACACCATTCAGAGCAAAGCTTCCAAGCGCGCTCTCACCCTCCATTCCACCGTTCTTAGTAGTAGTGACTTTAGCCTACCTTGCATAGTATATTGAAGCAAGGAGTTGTGTAATAACGCTGTGTAAGGTAAGAACAGCTTGCTTGTACCTACCTTCGGGTTTCCCGAAAGGGAAAACCGTATGTAAGCTTATCTGTTTAATATGAAGTAATTTTCCTTAAGTATTCCTGCACGTTTGTTCTAGACAAGTGTTTATGCTAAGGACCCTATAGGAGAAACCTCTTCGGTTTGTTCTCGTTTTTAGCCTGCATCTTGCATAGGCGTCTGGAGAATCGGTATCCGTAGAGAAGTGTTCCCTTTGGGTGGAACTGCCTGGGGAGACGATAAACTCTTAGCTAGAACAAGTGTGACTTGGAATATCTTGTTAAGTTGCTTCTAAAAAGATAGATAGGTGAGGCATACGGTGAGTACCGAGTAGGACTTTACATCATCCGAAGCAAGCTTCTAAGGCTGTCTAAATAGGATTCGCCACCCTGCAAAGATCCTAAAGTTAAAATATCTCTCGAAG----------TGAACAGTAATTTAAACAGTAAACTGAATAGTGTTTTTGAATAGTAATCAGCCGAATAAACAGTAAACTGAATAGTATTCAGCCGAATAAATAGT
>chr11:9620949-9626981R
TGGTATCAGAGCCTGGTAATCATAGAGAAGCTAAATTTAGAAGCTAATATTGGAAAGTTAATAAATACCAAAGATAATATCAACATAAGGTGTAGACTAAGCCATACTGAAGAACATAGTTGGCACTCTAATAATAGCCAACTAAATTTAATTGTAGATTTAATATATAATTTCTATATAAATTGGAGTAAGAGACAAGAAGATTTAGAGCAAAAGTTAGAAGATATATATAAAGAACAAAAGCAATTTGTAGAACAATATTCTTTTCTTAATAATAAGCTAAATACTACATTAGAATTATTAGAAGATTATAAGATAAGGCAAAATAAAATTTCACAGAATAGTGATTATATTAAAGAATTACTAGACAAAATCAACTCTAGTAAAGGTAAGGAAATAGTTTTGGCTTCATCTGGCATAGTCTCATCTTCACAAGCCATTAATTCTGAAAAATGGACATATCTAGGAGTCTCTTTAGAAGAATAGCAAGCAGAGATGATAACTGTTCTGATAAACAAAAAGGCAAATATGATGACATAGATGAGCTGAAAGATGTTGCACAAGTAGATAAGCAGCTCGAAAGATATCAACGAGATACTTTAAGGGCAATAAGGCCTCAACAAGTATACTGCATGGGATTTTTTGAGAATAAGAATGGGCTTTATAGAATATCTAGAGAAGTAGAATTAAGTGTTCTAACAAAGCCAGTAGAATTAAAAATAGTAGCTAAAGAATTTGAAAATAGTTTAAAATATTCAGGATATAAGTATATTCACCAAGGTATGTACATAATAGGAATCAAAGGAATGACAAGAAAGAAATTAGGAGCTAAAGTGCTAATAACCTTATTAGATAAAAGATGGGACACAATAAACAAAGCATCTTTAGGCTATCTAGAAGGAGATATGAATGGAAATATGTTGATAACCTATATAGCGCCTGATTTAATGATGCCTGTAAATGAATTCATAGATAAAATGAGTTTTGGTTTCCAAACAAAAGGATACGAAGAGTTTAAGGGAACAAATTTATTAATAAGTATAGAATTTATAGGAAGATTGACTAATAGAAGTGCCTCCAAATACAAAATCAATGTAAATGATGTGATAGAAAAAATGCATTCTAAAGGAATAAAATTCATGAGCCCTTTAATAATAGACTCTGAAGAAAGAGCAGGAGAAAAATGGCCAATTAGTGAATTTATAAAAAATAAAACCTTGAGTCAGCCTGAAAACTTCATAAGTTACCAAGACAGCAAAGGGAATGTTAGTATTAGATTTACAAATTATAAAACCAGAGCTTCGGATGATTTGGATGCAGAATCATCTGACAGAGATATTATAGATAACAGAAGACATAGTATATCTGAATTGATGGAAAAATTAGACCATGAAAGTGAAATAAAATATTATGAAGATAAATTAAGAGATATAGCAGATGAATATAATAACTCTATGAAAAGTGAGTGGCCTAAAATTAGAGACAAGAAACTTTATTTCTATAGAGAACTATCCAGGATTAAGAAACAAAAAAAAGAGAAAAGCTTGGCCATAGAAACCCCCAGAACCCAGGAAATTAAAATAGAACAAATAAAGTCAGAAGAACCAAGAGAAGAAATCCAAAAGTTAGATAAGGTATTAAGTGAGGAAGAGCAATGGGAAGTAAATGAGAAATTATTACTAGAGAGTTATGAAGAAGAAAATAACCTGATAGAGGAAATAGAGAATATAGAA---GAAGAAGATAATGCAGAACAATATAATGATTTTATAGACTCATTGGATGAGGAAGGTTTGCATAATCTAGATAATGCAATGGAAGCTATGGAAGTAGATTTGGGAACAGGAAAAAGGAAAAGATACGGAGAGGGTTCTGTAAAAAATGAAGGAGAAAGAGAAAGACCAGCCAGGGCAGCAGGAAGATGGCCTCCAGAAAAAGAAGAATATTCATATCATTATATCCCAGGACAGTATAGGCACATGGGCACTAAAAGAAGAGATTTTGAGAAACCAATAAAATTTCAAAATCAAAAAAGTGATGGGGCTATACTAAATCTAGCAGCACATGATCCCATAGACTGGCCTAATATTATTAGTATTTGGAAAGGTTTAATAGTTCAAAAATATATACAAAACCAGCACAATATAGGAAGTAAAGTTGAAGATATGATAACCTACTTAGAAACATTTTTAGGTGAATCTGCTAAGGTTCTATGGGAACAATGGGTTGAAAAGAATCCTAATAATTATGAAGAATTGAAAAGAGCTGGTAGCAATCCGCATAATTTTGCAAATGTTATATCTAACATTATTATAGCTGAAGATCCGGAATTAGGTTATACAACTTTGCAAAATGAAAGGTTAAAAGAAATAGAAAAATTAACGTTAACAAGTTGGAAAGGCATAAAAGAATTCTCCCAACATTATTTATATAATGCTACAACTGCTAAACAAGGATATAACAGGGGAATAGTTGAACGTTACTTCAATAAATTACCTGACCCACTAGGAAGTATGATATTTGAAGAATATAAAAAGGAAACTGAAGGAGCTGAAATCAATATCTCTCAAGCCATAACTTTTGTGTTTAAGCAACTAAGAAAAATATGCACGGGTATCCAAGCCCAAAGATCTATGAAACACTCGGATTACAATTTCTGCAATAAAATAGTTCAAATACCCTTGTCATATGGAGAAGACAAGCCTAGAAGTAAAAGGATTTATAAACATCAAAATAGAAACCATAATAATATTAGAACAAAGAAAAGGTATTTCTTAAGAAGATCAGATAATAGAGCACCATTCTTACATAAAAGAAATGTAAGAAGATATAATCCAAAGAAAACCTATGACAAAACATGCAGATGTTTTATATGCAACTCGCCAGATCATTTAAGTAGAACATGCCCAAATAAAGATCAAAAGAGATATTCTAGTAAATATGAAGAACAAGAGAGGGTTCTAATTATAGATAGCGTAAATGAAAACATATTAGTATGTGATGATGAAATAAAAGATGACGAGTCAATATATTCTATCATAGAAACAGACGAAGTTGAAACTATCAACGAAGAATATGAATCATCCGATGAAGAGTTAGATTTAATTGACGAATTAGCAGGTCTAAAGGTTGAAATGATGGATCAATTAAATTGTGAACATGATTGGATTAGAGGAAAGGGTGACTATAATATCAAATGTGCTTTTTGCATATATTACCCTAGTCAAGAAAATAGAGTGACTTGTAGTATATGTCTAAAACAAGCTTGTGCTGAATGTATAAAAGCAAATAAACAAAAATGGAGAAAAGAAATAGAATTAGAATCAGATGAAAAGATTTTATCTAGTAGAGTACGAGTGTTAGAAAATAGACTAAATAAATTAGAAATAGAATTAGAGAACCTAAAAAATAATTGTGATATTAAAGCATTACCAGAAAATAAGGACATACAAAACACCGAATTTAAAGAGCAATTGATAACACTAAAAGACAGTAATACTGCTAAAATAATTCAACTAAGAGATGCCATAACTAATTTTGGAAATAAATATATAGTAAGATTGCCTTTCAAAGAAATATTAGGTATAAGAATCCCTGTTAAAGTAAAATTGACACCCAAAGTATCTTATAAAATATTAGCACTAGTAGACACTGGGTGTACAAAGAATATTATTCATGACAAATATTTCACAAGATGTCCTGAAATAGTTCACACAATTGACGACAATAAGGCAGAAGTTTCCACAGACATGTCCGGAATAAAGAAAATTCATAATCAGTTAGCTTATAATATGGAGGTTTACATTAATGCAACTAAATATATAATAGATGAGATTACAATAAGAGATTTGTCAATGATTAATGATGACATGATAATTGGCCTAAGGTTCCTTCAACAATCAGTACAAACCACAGTAATACATGAGCAAGGAATTACTTTTATCCCATATCAAAATAATGTTCCATATATCTCAGAGGTACGAAAGTGTGGTGGAGTCTCCCC---------------CAAACTCGACAACTTAGAAGTACCTAATCTTGAGTCTGAAGAAAGAATTAATGAATATGAGCTTAGTGAGAATATAGACAACTATTCTTTCTCATCATATCTTCCAAAATCTATGGAATTGCCAGGTAAGACATC--ATGGGAAGATAGATATT----------------TATTAAAAGCTACTAAAGATTTTGAATATAT---------------------------ATGCAGGGAAATGGCTTCACAGAAGTCTG----------AATGGCTCACAAATATGAGTTCATGGAGACTGCCCCAACTGCCCAGAGGCCATGGAGAACGATTTAATCACAATTTCAGA-----ATAACAGAGCTAC---AACAAGGGTTATTAA----------------------------ACCTCTTGTGGCAAACAAAAA----------------------------------ACAAAAAAGAAAAAGCTC-------------------ATGCCTTAAATGGCC----------------------------------TGGCATATTATTTCAAAAATTT-----------CGTGCCCTCAGATCAAAAGATAACAGAAAA--------------------------------------------AAGGGCT----------------------------------------------AAAATACAAGATATCCCTCATCATGAGGAAAGGT---TACTAGATTATCGCGAGGA---------------GAAATCCCGTGATGGCCA------------AGATATACTTCCCATGGAAGTTGAACAA------TCTATGGCAACAGATAAGAATACCAAGGTATTCTCAGATAAGATTTTGATCTCAGCAGATCCTGCTTCGA----------------GCATGGTTGCTTTCCACATAAATATCAATAACCTATTGCAATCTTTTCCACATAATAAACCATCATCATCCACAAAAAGGCATGATACCATTCCCCAAACACCATACATACTGC--ATAATCATCC---TAATTTATTCCTTCCACAA-----TATATACTCCGGACCCAGCCAAAAGCACCATGTAGATCTTGTGCCTACA--------------AAGATTCTTGCAAAAAGAAACTTAAAAGCCAAAATC----------CCATGAG--------TACTACAT-------ACGAAAATCTCCAACCCAGATTAAGCTTC------------AAAACGGAACAAACTTTATCCTGCTTTGGGCAAGACA--------------TCCTCGATCTTGT----------TTGGCAAAAGTTTAAGGAGAGA--------CAAATGAAAATATTCCTTGGACTCCAAGATTATTTCTTTGATCTC------------TTAGAAGGG--------------------------------------AGAGAAAGAAACCCAGCCATACGAGTAATCATATATATGCTCCCTCTCTTAAGACTAGATGAACAGGCAATTTCTGACC------------------------CATCCTATA-GATTCCTGGT---------TCTCAAAGCTGAGATAAATCTTCAAAGATTCCGGAACCTA----CCCACATACAACCATGA----------AGAAATATCTCTCCAAACCATTATAGATCATGGTCTTGTGAATTCCATATATGCAACCCTCGATCAGATCCTTCAATCTGATTTAGGAAACGCTGTG-----------------AAAGATGTATGCAGGAGACTTG-----GACATGGAAGA---TACAGGATTATCTTCTCCTCAATA------CCACCAA--------AATTCACACCACCTGTTCGTCCAGCAATTCATTATATATATATCA--TGAAGGGACAAT--------------TTAATTTTCAAGAAGACGGTCCTAGCAAACT-------------ATTGGATGAAGA----GGAAGAAATATATACAACAGTTGCTAATCATGAAA---------------ATTGG----AGATTATTTTCTGAAGC--------------------------TGCAGAAA--TTGAAGAAGCTATCACCACAGATTATGAATATC-----AGCTGGTTTTCCAAAACAAGATCACAAGGATTTTTATCAGCAAATTCTACAACCAAAGTTATGAATACTTCAAGGGAGCAGGGCGCATAATTAAACCGGATT-------TTGGAAATGAATGCTCCAAGAAAAGTTACTACAGAAGCCTGGCTCAGTGGTTTCAGAAAACAGAGCCATCAGAGATTGACACGGTGCAATCAGCACCAATGATAATCAACGAAGATAATGAATAAAGATCTTGTCATCCCCGACAAAGATCACTATTCAAGATAAGGAATCTACA----CTATTCCAGAT-----AAGTATGGATCTTGGTGGTCATGGGCAGCCAGATGAATAGAATTCTTTAAGCTAAATATGTTTTTCAATATATATTGATAATAGAATATCAATAATTTGGGCGTGGAAGAAGAATAAAAGAAATTCAGAAGATTACTC--------------AAGAAAGAATCCAAAAGGACACCCTATAAAGGATAAGGGAACAATATAAGGTGCGGTGAATGACATATCACTGTGAAGAATAA--------------------------------------------------------------------------------------------------------------------------------------------------------------------------------------------------------------------------------------------------------------------------------------------------------------------------------------------------------------------------------------------------------------------------------------------------------------------------------------------------------------------------------------------------------------------------------------------------------------------------------------------------------------------------------------------------------------------------------------------------------------------------------------------------------------------------------------
>chr12:22979220-22982951R
----------------------------------------------------------------------------------------------------------------------------------------------------------------------------------------------------------------------------------------------------------------------------------------------------------------------------------------------------------------------------------------------------------------------------------------------------------------------------------------------------------------------------------------------------------------------------------------------------------------------------------------------------------------------------------------------------------------------------------------------------------------------------------------------------------------------------------------------------------------------------------------------------------------------------------------------------------------------------------------------------------------------------------------------------------------------------------------------------------------------------------------------------------------------------------------------------------------------------------------------------------------------------------------------------------------------------------------------------------------------------------------------------------------------------------------------------------------------------------------------------------------------------------------------------------------------------------------------------------------------------------------------------------------------------------------------------------------------------------------------------------------------------------------------------------------------------------------------------------------------------------------------------------------------------------------------------------------------------------------------------------------------------------------------------------------------------------------------------------------------------------------------------------------------------------------------------------------------------------------------------------------------------------------------------------------------------------------------------------------------------------------------------------------------------------------------------------------------------------------------------------------------------------------------------------------------------------------------------------------------------------------------------------------------------------------------------------------------------------------------------------------------------------------------------------------------------------------------------------------------------------------------------------------------------------------------------------------------------------------------------------------------------------------------------------------------------------------------------------------------------------------------------------------------------------------------------------------------------------------------------------------GATGGATCAATTAAATTGTGAACATGATTGGATTAGAGGAAAGGGTGACTATAATATCAAATGTGCTTTTTGCATATATTACCCTAGTCAAGAAAATAGAGTGACTTGTAGTATATGTCTAAAACAAGCTTGTGCTGAATGTATAAAAGCAAATAAACAAAAATGGAGAAAAGAAATAGAATTAGAATCAGATGAAAAGATTTTATCTAGTAGAGTACGAGTGTTAGAAAATAGACTAAATAAATTAGAAATAGAATTAGAGAACCTAAAAAATAATTGTGATATTAAAGCATTACCAGAAAATAAGGACATACAAAACACCGAATTTAAAGAGCAATTGATAACACTAAAAGACAGTAATACTGCTAAAATAATTCAACTAAGAGATGCCATAACTAATTTTGGAAATAAATATATAGTAAGATTGCCTTTCAAAGAAATATTAGGTATAAGAATCCCTGTTAAAGTAAAATTGACACCCAAAGTATCTTATAAAATATTAGCACTAGTAGACACTGGGTGTACAAAGAATATTATTCATGACAAATATTTCACAAGATGTCCTGAAATAGTTCACACAATTGACGACAATAAGGCAGAAGTTTCCACAGACATGTCCGGAATAAAGAAAATTCATAATCAGTTAGCTTATAATATGGAGGTTTACATTAATGCAACTAAATATATAATAGATGAGATTACAATAAGAGATTTGTCAATGATTAATGATGACATGATAATTGGCCTAAGGTTCCTTCAACAATCAGTACAAACCACAGTAATACATGAGCAAGGAATTACTTTTATCCCATATCAAAATAATGTTCCATATATCTCAGAGGTACGAAAGCGTGGTGGAATCTCCCC---------------CAAACTCGACAACTTAGAAGTACCTAATCTTGAGTCTGAAGAAAGAATTAATGAATATGAGCTTAGTGAGAATATAGACAACTATTCTTTCTCATCATATCTTCCAAAATCTATGGAATTGCCAGGTAAGACATC--ATGGGAAGATAGATATT----------------TATTAAAAGCTACTAAAGATTTTGAATATAT---------------------------ATGCAGGGAAATGGCTTCACAGAAGTCTG----------AATGGCTCACAAATATGAGTTCATGGAGACTGCCCCAACTGCCCAGAGGCCATGGAGAACGATTTAATCACAATTTCAGA-----ATAACAGAGCTAC---AACAAGGGTTATTAA----------------------------ACCTCTTGTGGCAAACAAAAA----------------------------------ACAAAAAAGAAAAAGCTC-------------------ATGCCTTAAATGGCC----------------------------------TGGCATATTATTTCAAAAATTT-----------CGTGCCCTCAGATCAAAAGATAACAGAAAA--------------------------------------------AAGGGCT----------------------------------------------AAAATACAAGATATCCCTCATCATGAGGAAAGGT---TACTAGATTATCGCGAGGA---------------GAAATCCCGTGATGGCCA------------AGATAAACTTCGCATGGAAGTTGAACAA------TCTATGGCAACAGATAAGAATACCAAGGTATTCTCAGATAAGATTTTGATCTCAGCAGATCCTGCTTCGA----------------GCATGGTTGCTTTCCACATAAATATCAATAACCTATTGCAATCTTTTCCACATAATAAACCATCATCATCCACAAAAAGGCATGATACCATTCCCCAAACACCATACATACTGC--ATAATCATCC---TAATTTATTCCTTCCACAA-----TATATACTCCGGACCCAGCCAAAAGCACCATGTAGATCTTGTGCCTACA--------------AAGATTCTTGCAAAAAGAAACTTAAAAGCCAAAATC----------CCATGAG--------TACTACAT-------ACGAAAATCTCCAACCCAGATTAAGCTTC------------AAAACGGAACAAACTTTATCCTGCTTTGGGCAAGACA--------------TCCTCGATCTTGT----------TTGGCAAAAGTTTAAGGAGAGA--------CAAATGAAAATATTCCTTGGACTCCAAGATTATTTCTTTGATCTC------------TTAGAAGGG--------------------------------------AGAGAAAGAAACCCAGCCATACGAGTAATCATATATATGCTCCCTCTCTTAAGACTAGATGATCAGGCAATTTCTGACC------------------------CATCCTATA-GATTCCTGGT---------TCTCAAAGCTGAGATAAATCTTCAAAGATTCCGGAACCTA----CCCACATACAACCATGA----------AGAAATATCTCTCCAAACCATTATAGATCATGGTCTTGTGAATTCCATATATGCAACCCTCGATCAGATCCTTCAATCTGATTTAGGAAACGCTGTG-----------------AAAGATGTATGCAGGAGACTTG-----GACATGGAAGA---TACATGATTATCTTCTCCTCAATA------CCACCAA--------AATTCACACCACCTGTTCGTCCAGCAATTCATTATATATATATCA--TGAAGGGACAAT--------------TTAATTTTCAAGAAGACGGTCCTAGCAAACT-------------ATCGGATGAAGA----GGAAGAAATATATACAACAGTTGCTAATCATGAAA---------------ATTGG----AGATTATTTTCTGAAGC--------------------------TGCAGAAA--TTGAAGAAGCTATCACCACAGATTATGAATATC-----AGCTGGTTTTCCAAAACAAGATCACAAGGATTTTTATCAGCAAATTCTACAACCAAAGTTATGAATACTTCAAGGGAGCAGGGCGCATAATTAAACCGGATT-------TTGGAAATGAATGCTCCAAGAAAAGTTACTACAGAAGCCTGGCTCAGTGGTTTCAGAAAACAGAGCCATCAGAGATTGACACGGTGCAATCAGCACCAATGATAATCAACGAAGATAATGAATAAAGATCTTGTCATCCCCGACAAAGATCACTATTCAAGATAAGGAATCTACA----CTATTCCAGAT-----AAGTATGGATCTTGGTGGTCATGGGCAGCCAGATGAATAGAATTCTTTAAGCTAAATATGTTTTTCAATATATATTGATAATAGAATATCAATAATTTGGGCGTGGAAGAAGAAAAAACGAATTTCAGAAGACTACTCAAGGAGGAATCCAGAAGAAGGAATCCAGAAGGACACCCTAT-AAGCATAAAGGAACAATATAGGGTGCGGTGAATGACATATCCCTGTGAAGAATAAAACTTTCGGCGGAAAGGCCTCAACTTTAGCCTGCTCTCGTGAATCCACAGTAGCGAAGAGATAAGCAGGAGGCACAGGCGACGCCACCCCTGACCTCTATAAAAGGAGGGGTTTGCCC---AGCTGAGAAAGAAGACACCATTCAGAGCAAAGCTTCCAAGCGCGCTCTCACCCTCCATTCCACCGTTCTTAGTAGTAGTGACTTTAGCCTACCTTGCATAGTATATTGAAGCAAGGAGGTGTGTTATAACGCTGTGTAAGGTAAGAACAGCTTGCTTGTACCTACCTTCGGGTTTCCCGAAAGGGAAAACCGTATGTAAGCTTATCTGTTTAATATGAAGTAATTTTCCTTAAGTATTCCTGCACGTTTGTTCTAGACAAGTGTTTATGCTAAGGACCCTATAGGAGAAACCTCTTCGGTTTGTTCTCGTTTTTAGCCTGCATCTTGCATAGGCGTCTGGAGAATCGGTATCCGTAGAGAAGTGTTCCCTTCGGGTGGAACTGCCTGGGGAGACGATAAACTCTTAGCTAGAACAAGTGTGACTTGGAATATCTTTTTAAGTTGCTTCTAAAAAGACAGATAGGTGAGGCATACGGTGAGTACCGAGTAGGACTTTACATCATCCGAAGCAAGCTTCTGAGGCTGTCTAAATAGGATTCGCCACCCTGCAAAGATCCTAAAGTTAAAATATCTCTCGAAGTGAACAGTACTGAACAGTAATTTGAACAGTAAAC-------------TGAATAGTAATCAGCCGAATAAACAGTAAACTGAATAGTAATCAGCCGAATAAATAGT
>chr09:1109745-1117256R
TGGTATCAGAGCCTGGTAATCATAGAGAAGCTAAATTTAGAAGCTAATATTGGAAAGTTAATAAATACCAAAGATAATATCAACATAAGGTGTAGACTAAGCCATACTGAAGAACATAGTTGGCACTCTAATAATAGCCAACTAAATTTAATTGTAGATTTAATATATAATTTCTATATAAATTGGAGTAAGAGACAAGAAGATTTAGAGCAAAAGTTAGAAGATATATATAAAGAACAAAAGCAATTTGTAGAACAATATTCTTTTCTTAATAATAAGCTAAATACTACATTAGAATTATTAGAAGATTATAAGATAAGGCAAAATAAAATTTCACAGAATAGTGATTATATTAAAGAATTACTAGACAAAATCAACTCTAGTAAAGGTAAGGAAATAGTTTTGGCTTCATCTGGCATAGTCTCATCTTCACAAGCCATTAATTCTGAAAAATGGACATATCTAGGAGTCTCTTTAGAAGAATAGCAAGCAGAGATGATAACTGTTCTGATAAACAAAAAGGCAAATATGATGACATAGATGAGCTGAAAGATGTTGCACAAGTAGATAAGCAGCTCGAAAGATATCAACGAGATACTTTAAGGGCAATAAGGCCTCAACAAGTATACTGCATGGGATTTTTTGAGAATAAGAATGGGCTTTATAGAATATCTAGAGAAGTAGAATTAGGTGTTCTAACAAAGCCAGTAGAATTAAAAATAGTAGCTAAAGAATTTGAAAATAGTTTAAAATATTCAGGATATAAGTATATTCACCAAGGTATGTACATAATAGGAATCAAAGGAATGACAAGAAAGAAATTAGGAGCTAAAGTGCTAATAACCTTATTAGATAAAAGATGGGACACAATAAACAAAGCATCTTTAGGCTATCTAGAAGGAGATATGAATGAAAATATGTTGATAACCTATATAGCGCCTGATTTAATGATGCCTGTAAATGAATTCATAGATAAAATGAGTTTTGGTTTCCAAACAAAAGGATACGAAGAGTTTAAGGGAACAAATTTATTAATAAGTATAGAATTTATAGGAAGATTGACTAATAGAAGTGCCTCCAAATACAAAATCAATGTAAATGATGTGATAGAAAAAATGCATTCTAAAGGAATAAAATTCATGAGCCCTTTAATAATAGACTCTGAAGAAAGAGCAGGAGAAAAATGGCCAATTAGTGAATTTATAAAAAATAAAACCTTGAGTCAGCCTGAAAACTTCATAAGTTACCAAGACAGCAAAGGGAATGTTAGTATTAGATTTACAAATTATAAAACCAGAGCTTCGGATGATTTGGATGCAGAATCATCTGACAGAGATATTATAGATAACAGAAGACATAGTATATCTGAATTGATGGAAAAATTAGACCATGAAAGTGAAATAAAATATTATGAAGATAAATTAAGAGATATAGCAGATGAATATAATAACTCTATGAAAAGTGAGTGGCCTAAAATTAGAGACAAGGAACTTTATTTCTATAGAGAACTATCCAGGATTAACAAACAAAAAAAAGAGAAAAGCTTGGTCATAGAAACCCCCAGAACCCAGGAAATTAAAATAGAACAAATAAAGTCAGAAGAACCAAGAGAAGAAATCCAAAAGTTAGATAAGGTATTAAGTGAGGAAGAGCAATGGGAAGTAAATGAGAAATTATTACTAGAGAGTTATGAAGAAGAAAACAACCTGATAGAGGAAATAGAGAATATAGAA---GAAGAAGATAATGCAGAACAATATAATGATTTTATAGACTCATTGGATGAGGAAGGTTTGCATAATCTAGATAATGCAATGGAAGCTATGGAAGTAGATTTGGGAACAGGAAAAAGGAAAAGATACGGAGAGGGTTCTGTAAAAAATGAAGGAGAAAGAGAAAGACCAGCCAGGGCAGCAGGAAGATGGCCTCCAGAAAAAGAAGAATATTCATATCATTATATCCCAGGACAGTATAGGCACATGGGCACTAAAAGAAGAGATTTTGAGAAACCAATAAAATTTCAAAATCAAAAAAGTGATGGGGCTATACTAAATCTAGCAGCACATGATCCCATAGACTGGCCAAATATCATTAGTATTTGGAAGGGGTTAATAGTTCAAAAATACATACAAAATCAGCATAATATAGGGAATAAGGTGGAGGATATGATAACTTATTTAGAAACATTTTTGGGTGAATCTGCTAAAGTCCTATGGGAACAATGGGTTGAAAAGAATCCTAATAACTATGAAGAGCTAAAAAGAGCAGGAAGTAATCCTCACAACTTTGCAAATATAGTATCTAATATTATCATAGCTGAAGACCCAGAATTAGGATATACAACCCTGCAAAATGAAAGATTAAAAGAAATAGAAAAATTAACTTTAACAAGCTGGAAAGGTATAAAGGAATTTTCTCAACATTATCTATATAATGCAACAACTGCTAAGCAAGGATACAATAAGGGAATAGTTGAGCGATATTTTAATAAACTACCTGACCCATTAGGTAGTATGATTTTTGAGGAATATAAAAAGGAAACTGAAGGAGCTGAAATTAATATTTCCCAAGCCATAACCTTCGTGTTCAAACAATTAAGAAAAATATGCACAGGAATACAAGCCCAAAGGTCAATGAAACATTCTGATTATAATTTTTGCAATAAAATAATACAAATACCTTTATCATATGGAGAAGATAGGCCTAGAAATAAAAGAAACCATAGATATCAAAGTAGAAATAGCAATAATATAAAGACAAAGAAAAGGTACTTCTTAAGAAGATCAGATAATAGAGCACCTTTCTTACATAAACGAAATGTAAGAAGATATAACCCAAAGAAAACTTATGATAAGACATGCAGATGTTTCATATGTAATTCACCAGATCATTTAAGTAGAACTTGCCCAAATAAAGATCAAAAAAGATATTCTAGTAAATATGAAGAACAAGAGAGAGTTTTAATTATAGATAGCGTAAATGAAAATATATTAGTATGTGATGATGAAATAAAAGATGACGAATCAATATATTCTATCATAGAAACAGATGAAATTGAAAACACCAATGAAGAGTATGAATCAACCGATGAAGAGTTAGATTTAATTGACGAACTAGCCGGTTTAAAAATAGAATTGATGGATCAGTTAAATTGTGAACATGATTGGATTAGAGGAAAAGGAGATTATAACATTAAATGTGCTTTTTGCATCTATTACCCAAGCCAAGATAATAGAGTAACCTGTAGTATATGCTTAAAACAAGCTTGTGCTGAATGTATAAAAGCAAATAAACAAAAATGGAGAAAAGAGATAGAATTAGAATCAGATGAAAGGATATTATCTAGTAGAGTACGAGTTTTAGAAAACAGAATAAATAAACTAGAAGTGGAACTAGAGAATCTAAAAATTAACTATGATATTAAGGCATTACCAGAAAATAAGGATATACAAAATACCGAATTTAAAGAGCAAGTGATAACATTAAAAGACAGTAATACTGCTAAAATAATTCAACTAAAAGATGCCATAACTAATTTTGGAAATAAATATATAGTAAAACTGCCTTTCAAAGAAATTTTGGGAATAAGAATACCGGTAAAAGTAAAACTATCACCCAAGGTATCATATAAAATTCTAGCACTAGTAGACACTGGGTGTACAAAAAATATTATTCATGATAAGTACTTCATAAAATGTCCAGAAATAGTTCATACAATTGATGATAATAAGGCAGAAGTCTCTACAGACATGTCCGGAATAAAGAAAATTCATAATCAGCTAGCTCATAATGTTGAAGTATACATTAATGGAACTAAATATATAATAGATGAGATTACAATAAGAAACTTATCCATGATAAGTGATGACATGATAATTGGCCTAAGGTTTTTACAACAATCGGTACAAACCACAGTAATACATGAGCAAGGAATTACTTTTATCCCATATCAAAACAATGTGCCATATATCTCAGAGGTACGAAAGCGTGGTGGAGCCAGAAT---------------CAAACCCGACAACCTTGAAGCACTCAACCTTGAGTCTGAAGAAAGAATTAATGAATATGAACTTAGTGAGAATATAGACATCTATTATATATCAAATTCCAATATAGAGTGCATAGGATTACAAGCATTTGCACCAAATTGGTATAGGGATATTAAGTCTAAAAAGGATATAGAAAAAATTGTTCAAAGATTAGAGGATATCCAAATTATAGGAGAAATTCCTATGAAATATTGGGAGAAAAATGCTATCGAGTGTAAAATTAATATAATAAACCTAGAATATA---TTATTAAGACCAGCCCAA-----TAGAAGCAACTCCGAAAGATATAG-AAGAATTTAAGATGCATATAGAAGAACTGCTGAAACTAGGAGCAATAAGAGAGAGTAGAAGTCCACATAGGTCTGCAGCATTTATAGTAAGAAATCATGCGGAAGAAGTTAGAGGAAAATCTAGGATGGTCATAAATTATAAAAGGCTAAATGATAATACTATAGAAGATGCCTATAATATCCCAAATAAGCAAGAATGGATTAATAGGATACAAGGTAGCAAATATTTCTCGAAATTTGACTTAAAAGCTGGGTTTTGGCAAGTAAAAATGGCAGAAGAGTCTATAGAATGGACTGCATTCACATGTCCCCAGGGACACTATGAATGGCTAGTAATGCCACTAGGATTAAAAAATGCACCTGCCCTATTTCAAAGAAAAATGCAAAACATTTTTAACGATAATCAAGAATTTGTGTTAGTATATATAGATGACTTGTTAATATTTTCAAAAACTTATAAGCATCATATTGCTCACCTAGAATTATTTTTTAGAAAGGTTGAGCAAAATGGTTTAATCCTATCAAAAAAGAAGATGGAGATATGCAAAGAAAAAGTT-------------AACTTCCTTGGACATGAAATAGGAGAAGGCAAAATTCATTTGCAAGAACATATTGCTAAGAAAATTTTACAATTTCCTGATGCT--------ATGAATGACAAAAAGAAATTACAGCAATTCCTAGGACTTGTAAATTATGCTAGAAATCACATCAACAATTTAGCAAAGCTAGCAGGACCTTTATATGCTAAATTAAGAAAAAATGGTCAGAAATATTTTAATTCTGAAGACATTAAATTAGTAAGATTAATAAAAGAAAAAGTGAAAGAACTAAAACCTCTAGAATTACCATTAGAAGAAAGTTACTTTATCATTGAAACCGATGCATCACAACAAGGTTGGGGTGCTATATTAAAGCAAAGACCTACTAAATTTTCCGCTAAATCAGAAGAAAAAATATGTAGGTATGCTTCTGGAAGTTATAAATTAAAAACTGTCAATAATACAGATAGAGAGATCATGGCAATTATCAATGCAATTAATGCCTTTAGGTTATACCTAGGGTTTAAAGAATTCACGGTTAGAACTGATTGTGAAGCCATCTGTAGATATTATAACCAGCTTAATAGCAAGAAAAGCTCAACTAGAAGATGGATTTTATTTGAAGATATTATTACAGGAAATGGTTATAGAGTTATATTTGAACATATTAAGGGGAAAGATAATAGTTTACCTGACATGCTTTCTCGTTTAACCATATTTCAGGTATGAAAAGATCAATGAATTACGCCGGAGTCGAGTGCTTCACATTTGGAGATGACAACAAACTCAGAATATTCCCACCAAATTCATATAAATTTAAGCCAAAGGA---CCATAT----AATCCTAGATGAAGTTCAAGAGTGCATCTTGGATAATTTCTGGTACCAATACAATAATAAAAGGGAAGAAAAAGGGTATTTGTTATCAATATTGAATAGCCTCTCTGAATATTTTCACCT-AATAAATGGGTCATTAATGCCTGCCAATGAAGATCATGAAGTAATCCAACAAAAGCCTATATATGTAGTATTTGATGGAAAGCTCCCTGGGGTCTACATTTCTTTTGAAGAAATTGTGGCTCA-AAAATAGATGCTAAATTAATGGGAGGAATATCTTGGAAGAAATATA-AGGATATTGATGAAGCATTAAGCCAAGCTAGAAAAATATTAGGAATAAATTATTATCTAGAGCCTGCTGCAAAAGAATATATTCAAAAATGCAAAAAAGCTAAAGGAAAGAAGACTTCAGA-----AATACCCATTAAGATGACTAT--AAAAGAAGA----AGGGTTTTTTA----AAAAACCCACATACAAG-----GAATGCTTAACAAAAGGAGTGGATCCATTAGATGGGGAATATATTGATTGGAAGATAAT------AGAAAAATT--TGAAGAAGCCT--CCCCACAGTTAAAGA-------------AGGAATTGAA-----GGAAGAAATACTTAAAGAATTAAAACAAGAAATGGATCAGAAATTTGAGCA-----AATAAAAAAGGCAGT---AGATGAGAAATTAGAAGTTTCTTTTTCTGATTTGGACACAATGGATCTTGGTGGCCATGGGCAACCAGATGAATAAATTAATATAAGCTAAATATGTTTTTCAATATATATTGATAATAGAATATCAACAATTTGGGCGTGGAAGAAGAATAAAAGAAATTCAGAAGATTACCC--------------AAGAAAGAATCCAGAAGGACACCCTATAAAGGATAAGGGGACAATATAGGGTGCGGTGAATGACATATCACTGTGAAGAGTAAAACTTTCGGTGGAAAGGCCTCGACTTTAGCCAGCTCCCGTGAAGATACAGTAGCGAAGAGATAAGCAGGAGGCACAGGCGACGCCATCCCTGGCCTCTATAAAAGGAGACGTTGGCCTTCACTCCGGAGACGAAGACACCATTCAGAGCAAAGCTTCCAAGCGCGCTCTCACCCTCCATTCCACCGTTCTTAGTAGTAGTGACTTTAGCCTACCTTGCATAGTATATTGAAGCAAGGAGTTGTGTAATAACGCTGTGTAAGGTAAGAACAGCTTGCTTGTACCTACCTTCGGGTTTCCCGAAAGGGAAAACCGTATGTAAGCTTATCTGTTTAATATGAAGTAATTTTCCTTAAGTATTCCTGCACGTTTGTTCTAGACAAGTGTTTATGCTAAGGACCCTATAGGAGAAACCTCTTCGGTTTGTTCTCGTTTTTAGCCTGCATCTTGCATAGGTGTCTGGAGAATCGGTATCCGTAGAGAAGTGTTCCCTTCGGGTGGAACTGCCTGGGGAGACGATAAACTCTTAGCTAGAACAAGTGTGACTTGGAATATCTTGTTAAGTTGCTTCTAAAAAGATAGATAGGTGAGGCATACGGTGAGTACCGAGTAGGACTTTACATCATCCGAAGCAAGCTTCTGAGGCTGTCTAAATAGGATTCGCCACCCTGCAAAGATCCTAAAGTTAAAATATCTCTCGAAGTGAACAGTATTGAACAGTAATTTAAACAGTAAACTGAATAGTGTTTTTGAATAGTAATCAGCCGAATAAACAGTAAACTGAATAGTATTCAGCCGAATAAATAGT
>chr10:14374936-14378451R
--------------------------------------------------------------------------------------------------------------------------------------------------------------------------------------------------------------------------------------------------------------------------------------------------------------------------------------------------------------------------------------------------------------------------------------------------------------------------------------------------------------------------------------------------------------------------------------------------------------------------------------------------------------------------------------------------------------------------------------------------------------------------------------------------------------------------------------------------------------------------------------------------------------------------------------------------------------------------------------------------------------------------------------------------------------------------------------------------------------------------------------------------------------------------------------------------------------------------------------------------------------------------------------------------------------------------------------------------------------------------------------------------------------------------------------------------------------------------------------------------------------------------------------------------------------------------------------------------------------------------------------------------------------------------------------------------------------------------------------------------------------------------------------------------------------------------------------------------------------------------------------------------------------------------------------------------------------------------------------------------------------------------------------------------------------------------------------------------------------------------------------------------------------------------------------------------------------------------------------------------------------------------------------------------------------------------------------------------------------------------------------------------------------------------------------------------------------------------------------------------------------------------------------------------------------------------------------------------------------------------------------------------------------------------------------------------------------------------------------------------------------------------------------------------------------------------------------------------------------------------------------------------------------------------------------------------------------------------------------------------------------------------------------------------------------------------------------------------------------------------------------------------------------------------------------------------------------------------------------------------------------------------------------------------------------------------------------------------------------------------------------------------------------------------------------------------------------------------------------------------------------------------------------------------------------------------------------------------------------------------------------------------------------------------------------------------------------------------------------------------------------------------------------------------------------------------------------------------------------------------------------------------------------------------------------------------------------------------------------------------------------------------------------------------------------------------------------------------------------------------------------------------------------------------------------------AACCTTGAAGCACTCAACCTTGAGTCTGAAGAAAGAATTAATGAATATGAACTTAGTGAGAATATAGACATCTATTATATATCAAATTCCAATATAGAGTGCATAGGATTACAAGCATTTACACCAAATTGGTATAGGGATATTAAGTCTAAAAAGGATATAGAAAAAATTGTTCAAAGATTAGAGGATATCCAAATTATAGGAGAAATTCCTATGAAATATTGGGAGAAAAATGCTATCGAGTGTAAAATTAATATAATAAACCCAGAATATA---TTATTAAGACCAGCCCAA-----TAGAAGCAACTCCGAAAGATATAG-AAGAATTTAAGATGCATATAGAAGAACTGCTGAAACTAGGAGCAATAAGAGAGAGTAGAAGTCCACATAGGTCTGCAGCATTTATAGTAAGAAATCATGCGGAAGAAGTTAGAGGTAAATCTAGGATGGTCATAAATTATAAAAGGCTAAATGATAATACTATAGAAGATGCCTATAATATCCCAAATAAGCAAGAATGGATTAATAGGATACAAGGTAGCAAATATTTCTCGAAATTTGACTTAAAAGCTGGGTTTTGGCAAGTAAAAATGGCAGAAGAGTCTATAGAATGGACTGCATTCACCTGTCCCCAGGGACACTATGAATGGCTAGTAATGCCACTAGGATTAAAAAATGCACCTGCCCTATTTCAAAGAAAAATGCAAAACATTTTTAACGATAATCAAGAATTTGTGTTAGTATATATAGATGACTTGTTAATATTTTCAAAAACTTATAAGGATCATATTGCTCACCTAGAATTATTTTTTAGAAAGGTTGAGCAAAATGGTTTAATCCTATCAAAAAAGAAGATGGAGATATGCAAAGAAAAAGTT-------------AACTTCCTTGGACATGAAATAGGAGAAGGCAAAATTCATTTGCAAGAACATATTGCTAAGAAAATTTTACAATTTCCTGATGCT--------ATGAATGACAAAAAGAAATTACAGCAATTCCTAGGACTTGTAAATTATGCTAGAAATCACATCAACAATTTAGCAAAGCTAGCAGGACCTTTATACACTAAATTAAGAAAAAATGGTCAGAAATATTTTAATTCTGAAGACATTAAATTAGTAAGATTAATAAAAGAAAAAGTGAAAGAACTAAAACCTCTAGAATTACCATTAGAAGAAAGTTACTTTATCATTGAAACCGATGCATCACAACAAGGTTGGGGTGCTATATTAAAGCAAAGACCTACTAAATTTTCCGCTAAATCAGAAGAAAAAATATGTAGGTATGCTTCTGGAAGTTATAAATTAAAAACTGTCAATAATACAGATAGAGAGATCATGGCAATTATCAATGCAATTAATGCCTTTAGGTTATACCTAGGGTTTAAAGAATTCACGGTTAGAACTGATTGTGAAGCCATCTGTAGATATTATAACCAGCTTAATAGCAAGAAAAGCTCAACTAGAAGATGGATTTTATTTGAAGATATTATTACAGGAAATGGTTATAGAGTTATATTTGAACATATTAAGGGGAAAGATAATAGTTTACCTGACATGCTTTCTCGTTTAACCATATTTCAGGTATGAAAAGATCAATGAATTACGCCGGAGTCGAGTGCTTCACATTTGGAGATGACAACAAACTCAGAATATTCCCACCAAATTCATATAAATTTAAGCCAAAGGA---CCATAT----AATCCTAGATGAAGTTCAAGAGTGCATCTTGGATAATTTCTGGTACCAATACAATAATAAAAGGGAAGAAAAAGGGTATTTGTTATCAATATTGAATAGCCTCTCTGAATATTTTCACCT-AATAAATGGGTCATTAATGCCTGCCAATGAAGATCATGAAGTAATCCAACAAAAGCCTATATATGTAGTATTTGATGGAAAGCTCCCTGGGGTCTACATTTCTTTTGAAGAAATTGTGGCTCAAAAAATAGATGCTAAATTAATGGGAGGAATATCTTGGAAGAAATATA-AGGATATTGATGAAGCATTAAGCCAAGCTAGAAAAATATTAGGAATAAATTATTATCTAGAGCCTGCTGCAAAAGAATATATTCAAAAATGCAAAAAAGCTAAAGGAAAGAAGACTTCAGA-----AATACCCATTAAGATGACTAT--AAAAGAAGA----AGGGTTTTTTA----AAAAACCCACATACAAG-----GAATGCTTAACAAAAGGAGTGGATCCATTAGATGGGGAATATATTGATTGGAAGATAAT------AGAAAAATT--TGAAGAAGCCT--CCCCACAGTTAAAGA-------------AGGAATTGAA-----GGAAGAAATACTTAAAGAATTAAAACAAGAAATGGATCAGAAATTTGAGCA-----AATAAAAAAGGCAGT---AGATGAGAAATTAGAAGTTTCTTTTTCTGATTTGGACACAATGGATCTTGGTGGCCATGGGCAACCAGATGAATAAATTAATATAAGCTAAATATGTTTTTCAATATATATTGATAATAGAATATCAACAATTTGGGCGTGGAAGAAGAATAAAAGAAATTCAGAAGATTACCC--------------AAGAAAGAATCCAGAAGGACACCCTATAAAGGATAAGGGGACAATATAGGGTGCGGTGAATGACATATCACTGTGAAGAGTAAAACTTTCGGTGGAAAGGCCTCGACTTTAGCCAGCTCCCGTGAAGATACAGTAGCGAAGAGATAAGCAGGAGGCACAGGCGACGCCATCCCTGGCCTCTATAAAAGGAGACGTTGGCCTTCACTCTGGAGACGAAGACACCATTCAGAGCAAAGCTTCCAAGCGCGCTCTCACCCTCCATTCCACCGTTCTTAGTAGTAGTGACTTTAGCCTACCTTGCATAGTATATTGAAGCAAGGAGTTGTGTAATAACGCTGTGTAAGGTAAGAACAGCTTGCTTGTACCTACCTTCGGGTTTCCCGAAAGGGAAAACCGTATGTAAGCTTATCTGTTTAATATGAAGTAATTTTCCTTAAGTATTCCTGCACGTTTGTTCTAGACAAGTGTTTATGCTAAGGACCCTATAGGAGAAACCTCTTCGGTTTGTTCTCGTTTTTAGCCTGCATCTTGCATAGGCGTCTGGAGAATCGGTATCCGTAGAGAAGTGTTCCCTTCGGGTGGAACTGCCTGGGGAGACGATAAACTCTTAGCTAGAACAAGTGTGACTTGGAATATCTTGTTAAGTTGCTTCTAAAAAGATAGATAGGTGAGGCTTACGGTGAGTACCGAGTAGGACTTTACATCATCCGAAGCAAGCTTCTGAGGCTGTCTAAATAGGATTCGCCACCCTGCAAAGATCCTAAAGTTAAAATATCTCTCGAAGTGAACAGTATTGAACAGTAATTTAAACAGTAAACTGAATAGTGTTTTTGAATAGTAATCAGCCGAATAAACAGTAAACTGAATAGTATTCAGCCGAATAAATAGT
>chr10:22719732-22720776R
------------------------------------------------------------------------------------------------------------------------------------------------------------------------------------------------------------------------------------------------------------------------------------------------------------------------------------------------------------------------------------------------------------------------------------------------------------------------------------------------------------------------------------------------------------------------------------------------------------------------------------------------------------------------------------------------------------------------------------------------------------------------------------------------------------------------------------------------------------------------------------------------------------------------------------------------------------------------------------------------------------------------------------------------------------------------------------------------------------------------------------------------------------------------------------------------------------------------------------------------------------------------------------------------------------------------------------------------------------------------------------------------------------------------------------------------------------------------------------------------------------------------------------------------------------------------------------------------------------------------------------------------------------------------------------------------------------------------------------------------------------------------------------------------------------------------------------------------------------------------------------------------------------------------------------------------------------------------------------------------------------------------------------------------------------------------------------------------------------------------------------------------------------------------------------------------------------------------------------------------------------------------------------------------------------------------------------------------------------------------------------------------------------------------------------------------------------------------------------------------------------------------------------------------------------------------------------------------------------------------------------------------------------------------------------------------------------------------------------------------------------------------------------------------------------------------------------------------------------------------------------------------------------------------------------------------------------------------------------------------------------------------------------------------------------------------------------------------------------------------------------------------------------------------------------------------------------------------------------------------------------------------------------------------------------------------------------------------------------------------------------------------------------------------------------------------------------------------------------------------------------------------------------------------------------------------------------------------------------------------------------------------------------------------------------------------------------------------------------------------------------------------------------------------------------------------------------------------------------------------------------------------------------------------------------------------------------------------------------------------------------------------------------------------------------------------------------------------------------------------------------------------------------------------------------------------------------------------------------------------------------------------------------------------------------------------------------------------------------------------------------------------------------------------------------------------------------------------------------------------------------------------------------------------------------------------------------------------------------------------------------------------------------------------------------------------------------------------------------------------------------------------------------------------------------------------------------------------------------------------------------------------------------------------------------------------------------------------------------------------------------------------------------------------------------------------------------------------------------------------------------------------------------------------------------------------------------------------------------------------------------------------------------------------------------------------------------------------------------------------------------------------------------------------------------------------------------------------------------------------------------------------------------------------------------------------------------------------------------------------------------------------------------------------------------------------------------------------------------------------------------------------------------------------------------------------------------------------------------------------------------------------------------------------------------------------------------------------------------------------------------------------------------------------------------------------------------------------------------------------------------------------------------------------------------------------------------------------------------------------------------------------------------------------------------------------------------------------------------------------------------------------------------------------------------------------------------------------------------------------------------------------------------------------------------------------------------------------------------------------------------------------------------------------------------------------------------------------------------------------------------------------------------------------------------------------------------------------ATTTGGGCGTGGAAGAAGAAAAAACGAATTTCAGAAGACTACTCAAGGAGGAATCCAGAAGAAGGAATCCAGAAGGACACCCTAT-AAGCATAAAGGAACAATATAGGGTGCGGTGAATGACATATCACTGTGAAGAGTAAAACTTTCGGTGGAAAGGCCTCGACTTTAGCCAGCTCCCGTGAAGATACAGTAGCGAAGAGATAAGCAGGAGGCACAGGCGACGCCATCCCTGGCCTCTATAAAAGGAGACGTTGGCCTTCACTCCGGAGACGAAGACACCATTCAGAGCAAAGCTTCCAAGCGCGCTCTCACCCTCCATTCCACCGTTCTTAGTAGTAGTGACTTTAGCCTACCTTGCATAGTATATTGAAGCAAGGAGTTGTGTAATAACGCTGTGTAAGGTAAGAACAGCTTGCTTGTACCTACCTTCGGGTTTCCCGAAAGGGAAAACCGTATGTAAGCTTATCTGTTTAATATGAAGTAATTTTCCTTAAGTATTCCTGCACGTTTGTTCTAGACAAGTGTTTATGCTAAGGACCCTATAGGAGAAACCTCTTCGGTTTGTTCTCGTTTTTAGCCTGCATCTTGCATAGGCGTCTGGAGAATTGGTATCCGAAGAGAAGTGTTCCCTTTGGGTGGAACTGCCTGGGGAGACGATAAACTCTTAGCTAGAACAAGTGTGACTTGGAATATCTTGTTAAGTTGCTTCTAAAAAGATAGATAGGTGAGGCATACGGTGAGTACCGAGTAGGACTTTACATCATCCGAAGCAAGCTTCTGAGGCTGTCTAAATAGGATTCGCCACCCTGCAAAGATCCTAAAGTTAAAATATCTCTCGAAGTGAACAGTATTGAACAGTAATTTAAACAGTAAACTGAATAGTGTTTTTGAATAGTAATCAGCCGAATAAACAGTAAACTGAATAGTATTCAGCCGAATAAATAGT
>chr02:8787268-8793168F
------------------------------------------------------------------------------------------------------------------------------------------------------------------------------------------------------------------------------------------------------------------------------------------------------------------------------------------------------------------------------------------------------------------------------------------------------------------------------------------------------------------------------------------------------------------------------------------------------------------------------------------------------------------------------------------------------------------------------------------------------------------------------------------------------------------------------------------------------------------------------------------------------------------------------------------------------------------------------------------------------------------------------------------------------------------------------------------------------------------------------------------------------------------------------------------------------------------------------------------------------------------------------------------------------------------------------------------------------------------------------------------------------------------------------------------------------------------------------------------------------------------------------------------------------------------------------------------------------------------------------------------AAATAGAACAAATAAAGTCAGAAGAACCAAGAGAAGAAATCCAAAAGTTAGATAAGGTATTAAGTGAGGAAGAGCAATGGGAAGTAAATGAGAAATTATTACTAGAGAGTTATGAAGAAGAAAACAACCTGATAGAGGAAATAGAGAATATAGAA---GAAGAAGATAATGCAGAACAATATAATGATTTTATAGACTCATTGGATGAGGAAGGTTTGCATAATCTAGATAATGCAATGGAAGCTATGGAAGTAGATTTGGGAACAGGAAAAAGGAAAAGATACGGAGAGGGTTCTGTAAAAAATGAAGGAGAAAGAGAAAGACCAGCCAGGGCAGCAGGAAGATGGCCTCCAGAAAAAGAAGAATATTCATATCATTATATCCCAGGACAGTATAGGCACATGGGCACTAAAAGAAGAGATTTTGAGAAACCAATAAAATTTCAAAATCAAAAAAGTGATGGGGCTATACTAAATCTAGCAGCACATGATCCCATAGACTGGCCAAATATCATTAGTATTTGGAAGGGGTTAATAGTTCAAAAATACATACAAAATCAGCATAATATAGGGAATAAGGTGGAGGATATGATAACTTATTTAGAAACATTTTTGGGTGAATCTGCTAAAGTCCTATGGGAACAATGGGTTGAAAAGAATCCTAATAACTATGAAGAGCTAAAAAGAGCAGGAAGTAATCCTCACAACTTTGCAAATATAGTATCTAATATTATCATAGCTGAAGACCCAGAATTAGGATATATAACCCTGCAAAATGAAAGATTAAAAGAAATAGAAAAATTAACTTTAACAAGCTGGAAAGGTATAAAGGAATTTTCTCAACATTATCTATATAATGCAACAACTGCTAAGCAAGGATACAATAAGGGAATAGTTGAGCGATATTTTAATAAACTACCTGACCCATTAGGTAGTATGATTTTTGAGGAATATAAAAAGGAAACTGAAGGAGCTGAAATTAATATTTCCCAAGCCATAACCTTCGTGTTCAAACAATTAAGAAAAATATGCACAGGAATACAAGCCCAAAGGTCAATGAAACATTCTGATTATAATTTTTGCAATAAAATAATACAAATACCTTTATCATATGGAGAAGATAGGCCTAGAAATAAAAGAAACCATAGATATCAAAGTAGAAATAGCAATAATATAAAGACAAAGAAAAGGTACTTCTTAAGAAGATCAGATAATAGAGCACCTTTCTTACATAAACGAAATGTAAGAAGATATAACCCAAAGAAAACTTATGATAAGACATGCAGATGTTTCATATGTAATTCACCAGATCATTTAAGTAGAACTTGCCCAAATAAAGATCAAAAAAGATATTCTAGTAAATATGAAGAACAAGAGAGAGTTTTAATTATAGATAGCGTAAATGAAAATATATTAGTATGTGATGATGAAATAAAAGATGACGAATCAATATATTCTATCATAGAAACAGATGAAATTGAAAACACCAATGAAGAGTATGAATCAACCGATGAAGAGTTAGATTTAATTGACGAACTAGCCGGTTTAAAAATAGAATTGATGGATCAGTTAAATTGTGAACATGATTGGATTAGAGGAAAAGGAGATTATAACATTAAATGTGCTTTTTGCATCTATTACCCAAGCCAAGATAATAGAGTAACCTGTAGTATATGCTTAAAACAAGCTTGTGTTGAATGTATAAAAGCAAATAAACAAAAATGGAGAAAAGAGATAGAATTAGAATCAGATGAAAGGATATTATCTAGTAGAGTACGAGTTTTAGAAAACAGAATAAATAAACTAGAAGTGGAACTAGAGAATCTAAAAATTAACTATGATATTAAGGCATTACCAGAAAATAAGGATATACAAAATACCGAATTTAAAGAGCAAGTGATAACATTAAAAGACAGTAATACTGCTAAAATAATTCAACTAAAAGATGCCATAACTAATTTTGGAAATAAATATATAGTAAAACTGCCTTTCAAAGAAATTTTGGGAATAAGAATACCGGTAAAAGTAAAACTATCACCCAAGGTATCATATAAAATTCTAGCACTAGTAGACACTGGGTGTACAAAAAATATTATTCATGATAAGTACTTCATAAAATGTCCAGAAATAGTTCATACAATTGATGATAATAAGGCAGAAGTCTCTACAGACATGTCCGGAATAAAGAAAATTCATAATCAGCTAGCTCATAATGTTGAAGTATACATTAATGGAACTAAATATATAATAGATGAGATTACAATAAGAAACTTATCCATGATAAGTGATGACATGATAATTGGCCTAAGGTTTTTACAACAATCGGTACAAACCACAGTAATACATGAGCAAGGAATTACTTTTATCCCATATCAAAACAATGTGCCATATATCTCAGAGGTACGAAAGCGTGGTGGAGCCAGAAT---------------CAAACCCAACAACCTTGAAGCACTCAACCTTGAGTCTGAAGAAAGAATTAATGAATATGAACTTAGTGAGAATATAGACATCTATTATATATCAAATTCCAATATAGAGTGCATAGGATTACAAGCATTTGCACCAAATTGGTATAGGGATATTAAGTCTAAAAAGGATATAGAAAAAATTGTTCAAAGATTAGAGGATATCCAAATTATAGGAGAAATTCCTATGAAATATTGGGAGAAAAATGCTATCGAGTGTAAAATTAATATAATAAACCCAGAATATA---TTATTAAGACCAGCCCAA-----TAGAAGCAACTCCGAAAGATATAG-AAGAATTTAAGATGCATATAGAAGAACTGCTGAAACTAGGAGCAATAAGAGAGAGTAGAAGTCCACATAGGTCTACAGCATTTATAGTAAGAAATCATGCGGAAGAAGTTATAGGTAAATCTAGGATGGTCATAAATTATAAAAGGCTAAATGATAATACTATAGAAGATGCCTATAATATCCCAAATAAGCAAGAATGGATTAATAGGATACAAGGTAGCAAATATTTCTCGAAATTTGACTTAAAAGCTGGGTTTTGGCAAGTAAAAATGGCAGAAGAGTCTATAGAATGGACTGCATTCACCTGTCCCCAGGGACACTATGAATGGCTAGTAATGCCACTAGGATTAAAAAATGCACCTGCCCTATTTCAAAGAAAAATGCAAAACATTTTTAACGATAATCAAGAATTTGTGTTAGTATATATAGATGACTTGTTAATATTTTCAAAAACTTATAAGGATCATATTGCTCACCTAGAATTATTTTTTAGAAAGGTTGAGCAAAATGGTTTAATCCTATCAAAAAAGAAGATGGAGATATGCAAAGAAAAAGTT-------------AACTTCCTTGGACATGAAATAGGAGAAGGCAAAATTCATTTGCAAGAACATATTGCTAAGAAAATTTTACAATTTCCTGATGCT--------ATGAATGACAAAAAGAAATTACAGCAATTCCTAGGACTTGTAAATTATGCTAGAAATCACATCAACAATTTAGCAAAGCTAGCAGGACCTTTATACGCTAAATTAAGAAAAAATGGTCAGAAATATTTTAATTCTGAAGACATTAAATTAGTAAGATTAATAAAAGAAAAAGTGAAAGAACTAAAACCTCTAGAATTACCATTAGAAGAAAGTTACTTTATCATTGAAACCGATGCATCACAACAAGGTTGGGGTGCTATATTAAAGCAAAGACCTACTAAATTTTCCGCTAAATCAGAAGAAAAAATATGTAGGTATGCTTCTGGAAGTTATAAATTAAAAACTGTCAATAATACAGATAGAGAGATCATGGCAATTATCAATGCAATTAATGCCTTTAGGTTATACCTAGGGTTTAAAGAATTCACGGTTAGAACTGATTGTGAAGCCATCTGTAGATATTATAACCAGCTTAATAGCAAGAAAAGCTCAACTAGAAGATGGATTTTATTTGAAGATATTATTACAGGAAATGGTTATAGAGTTATATTTGAACATATTAAGGGGAAAGATAATAGTTTACCTGACATGCTTTCTCGTTTAACCATATTTCAGGTATGAAAAGATCAATGAATTACGCCGGAGTCGAGTGCTTCACATTTGGAGATGACAACAAACTCAGAATATTCCCACCAAATTCATATAAATTTAAGCCAAAGGA---CCATAT----AATCCTAGATGAAGTTCAAGAGTGCATCTTGGATAATTTCTGGTACCAATACAATAATAAAAGGGAAGAAAAAGGGTATTTGTTATCAATATTGAATAGCCTCTCTGAATATTTTTACCT-AATAAATGGGTCATTAATGCCTGCCAATGAAGATCATGAAGTAATCCAACAAAAGCCTATATATGTAGTATTTGATGGAAAGCTCCCTGGGGTCTACATTTCTTTTGAAGAAATTGTGGCTCAAAAAATAGATGCTAAATTAATGGGAGGAATATCTTGGAAGAAATATA-AGGATATTGATGAAGCATTAAGCCAAGCTAGAAAAATATTAGGAATAAATTATTATCTAGAGCCTGCTGCAAAAGAATATATTCAAAAATGCAAAAAAGCTAAAGGAAAGAAGACTTCAGA-----AATACCCATTAAGATGACTAT--AAAAGAAGA----AGGGTTTTTTA----AAAAACCCACATACAAG-----GAATGCTTAACAAAAGGAGTGGATCCATTAGATGGGGAATATATTGATTGGAAGATAAT------AGAAAAATT--TGAAGAAGCCT--CCCCACAGTTAAAGA-------------AGGAATTGAA-----GGAAGAAATACTTAAAGAATTAAAACAAGAAATGGATCAGAAATTTGAGCA-----AATAAAAAAGGCAGT---AGATGAGAAATTAGAAGTTTCTTTTTCTGATTTGGACACAATGGATCTTGGTGGCCATGGGCAACCAGATGAATAAATTAATATAAGCTAAATATGTTTTTCAATATATATTGATAATAGAATATCAACAATTTGGGCGTGGAAGAAGAATAAAAGAAATTCAGAAGATTACCC--------------AAGAAAGAATCCAGAAGGACACCCTATAAAGGATAAGGGGACAATATAGGGTGCGGTGAATGACATATCACTGTGAAGAGTAAAACTTTCGGTGGAAAGGCCTCGACTTTAGCCAGCTCCCGTGAAGATACAGTAGCGAAGAGATAAGCAGGAGGCACAGGCGACGCCATCCCTGGCCTCTATAAAAGGAGACGTTGGCCTTCACTCCGGAGACGAAGACACCATTCAGAGCAAAGCTTCCAAGCGCGCTCTCACCCTCCATTCCACCGTTCTTAGTAGTAGTGACTTTAGCCTACCTTGCATAGTATATTGAAGCAAGGAGTTGTGTAATAGCGCTGTGTAAGGTAAGAACAGCTTGCTTGTACCTACCTTCGGGTTTCCCGAAAGGGAAAACCGTATGTAAGCTTATCTGTTTAATATGAAGTAATTTTCCTTAAGTATTCCTGCACGTTTGTTCTAGACAAGTGTTTATGCTAAGGACCCTATAGGAGAAACCTCTTCGGTTTGTTCTCGTTTTTAGCCTGCATCTTGCATAGGCGTCTGGAGAATCGGTATCCGTAGAGAAGTGTTCCCTTCGGGTGGAACTGCCTGGGGAGACGATAAACTCTTAGCTAGAACAAGTGTGACTTGGAATATCTTGTTAAGTTGCTTCTAAAAAGATAGATAGGTGAGGCTTACGGTGAGTACCGAGTAGGACTTTACATCATCCGAAGCAAGCTTCTGAGGCTGTCTAAATAGGATTCGCCACCCTGCAAAGATCCTAAAGTTAAAATATCTCTCGAAGTGAACAGTATTGAACAGTAATTTAAACAGTAAACTGAATAGTGTTTTTGAATAGTAATCAGCCGAATAAA-------------------------------TAGT

#for S7 Fig. (eRTBVL2 related to eRTBVL-B)
>chr08:11236546-11243393R
GATGGATCAATTAAATTGTGAACATGATTGGATTAAAGGAAAGGGTGACTATAATATCAAATGTGCTTTTTGCATATATTATCCAAGTCAAGAAAATAGAGTGACTTGTAGTATATGTCTAAAACAAGCTTGTGCTGAATGTATAAAAGCAAATAAACAAAAATGGAGAAAAGAAATAGAATTAGAATCAGATGAAAAGACTTTATCTAGTAGAGTACGAGTGTTAGAAAATAGACTAAATAAACTAGAAGTAGAATTAGAGAACCTAAAAAATAATTGCGATATTAAGGCACTACCAGAGAATAAGGACATACAAAACACCGAATTTAAAGAGCAATTGATAACATTAAAAGACAGTAATACTGCTAAAATAATTCAACTAAGAGATGCCATAACTAATTTTGGAAATAAATATATAGTAAGATTGCCTTTCAAAGAAATATTAGGTATAAGAATCCCTGTTAAAATAAAATTGACACCCAAAGTATCTTATAAAATATTAGCACTAGTAGACACTGGGTGTACAAAGAATATTATTCATGACAAATATTTCACAAGATGTCCTGAAATAGTTCACACAATTGACGACAATAAGGCAGAAGTTTCCACAGACATGTCCGGAATAAAGAAAATTCATAATCAGTTAGCTTATAATATGGAGGTTTACATTAATGCAACTAAATATATAATAGATGAGATTACAATAAGAGATTTGTCAATGATTAATGATGACATGATAATTGGCCTAAGGTTCCTTCAACAATCAGTACAAACCACAGTAATACATGAGCAAGGAATTACTTTTATCCCATATCAAAATACTGTTCCATATATCTCAGAGGTACGAAAGCGTGGTGGAACCTCCCCCTCCCCAAAACCCGACAAACTCGACAACTTAGAAGTACCCAATCTTGAGTCTGAAGAAAGAATTAATGAATATGAGCTTAGTGAGAATATAGACAACTATTCTTTCTCATCATATCTTCCAAAATCTATAGAATTGCCAGGTAAGACATCATGGGAAGATAGA------------------TATTTATTAAAAGCTACTAAAGATTTTGAATATATATGCA------------------------------------------------GGGAAATGGCTTCACAGAAGTCTGAATGGCTCACAAATATGAGTTC-ATGGAGACTGCCCCAACTGCCCAGAGGCCATGGAGAACGATTTAATCACAATTTCAGAATAACAGAGCTACAACAAGGGTTATTAAATCTTTTGTGGC-----------AAACAAAAAACAAAAAAGAAAAAGCTCATGCCTTAAATGGCTTGGCATATTATTTCAAAAA----------------------------TTTCGTGCCCTCAGATCAAAAGATAACAGAAAAAAGGGCTAAAATGCAAGATATCCCTCATCATGAAGAAAGGTTACTAGATTATCGCGAGGAGAAATCCCG--------------------------------------------------------------------------------------------------------------------------------------------------------------------------------------------------TGATGGCCAAGATAAACTTCTCATGGAAGTCGAACAATCTATGGCAACA------GATAAGAATACCAAGGTATTCTCAGATAAGATTTTGATCTCAGCA---GATCCTGCTTCGAGCATGGTTGCTTTCCACATAAATATCAATAACCTATTGCAATCTTTCCCACATA--ATAAACCATCATCATCCACAAAAAGGCATGATATCATTCCCCAAACACCATACATACTGCATAATCATCCTAATTTATTCCTTCCACAATATATACTCCGGACTCAGCCAAAAGCACCATGTAGATCTTGTGCCTACAAAGATTCTTGCAAAAAGAAACTTAAAAGCCAAAATCCCATGAGTACTACATACGAAAAT------------------CTCCAACCCAGATTAAGCTTCAAAACGGAACAAACTTTATCCTGCTTTGGGCAAGACATCCTCGATCTTGTTTGGCAAAAGTTTAAGGAGAGACAAATGAAAATATTCCTTGGACTCCAAGATTA--------------------------------------------------------------------------------------------------------------------TTTCTTTGATCTTTTAGAAGGGAGAGAAAGAAACCCAGCCATACGAGTAATCATATATATGCTCCCTCTCTTAAGACTAGATAATCAGGCAATTTCTGACCCATCCTATAGA----------------------------------TTCCTGGTTCTCAAAGCTGAGATAAATCTTCAAAGATTCCGGAACCTACCCACATACAACCATGA--------------AGAAATATCTCTCCAAACCATTATAGATCATGGTCTTGTGAATTCCATATATGCAACCCTCGATCAGATCCTTCAATCTGATTTAGGAAATGCTGTGAAAGATGTCTGCAGGAGACTTGGACATGGAAGATACAGGATTATCTTCTCCTCAATACCACCAAAATTCACACCACCTGTTCGTCCAGCAATTCAT--TATATATATATCATGAAGGGACAATTTAA-------------------TTTTCAAGAAGACGGTCTTAG----CAAACTATCGGATGAAGAGGAAGAAATATATACAACAGTTGCTAATCATGAAAATTGGAGATTATTTTCTGAAGCTGCAGAAATTGAAGAAGCTATCACC--------ACAGATTATGAATATCAGCTGGTTTTCCAAAACAAGATCACAAGGATTTTTATCAGCAAATTCTACAACCAAAGTTATGAATACTTCAAGGGAGCAGGGCGCATAATTAAACCGGATTTTGGAAATGAA---TGCTCCAAGAAA---AGTTACTACAGAAACCTGGCTC----AGTGGTTTCA-------GAAAACAGAGCCATCAGAGATTGACA-------CGGTACAATCAGCACCAATGATAATCAACGAAGATAATGAATAAAGATTTTGTCATCCCCGACAAAGATCACGATTCAAGATAAGGAATCTATACTATTCCAGATA------------------------------------------AGTATGGATCTTGGTGGCCATGGGCAACCAGATGAATAAATTAATATAAGCTAAATATGTTTTTCAATATATATTGATAATAGAATATCAATAATTTGGGCGTGGAAGAAGAATAAACGAATTTCAGAAGACTACTCAAGAAGGAATCCAGAAGAAGGAATCCAGAAGGACACCCTATAAAGCATAAAGGAACAATATAGGGT-------------------------------------------------GCGGTGAATGACATATCCCTGTGAAGAATAAAACTTTCGGT-GGAAAGGCCCCGGCTTTAGCTAGCTCTCGTGAATCCACAGTAGCGAAGAGATAAGCAGGAGACACAGGCGACGCCATCCCTGGCCTCTATAAAAGGAGACGTTGGCCTTCACTCCG--GAGGAAGACACCATTCAGAGCAAAGCTTTCAAGCGCGCTCTCACCCTCCATTCCACCGTTCTTAGTAGTAGTGACTTTAGCCTACCTTGCATAGTATATTGAAGCAAGGAGTTGTGTAATAACGCTGTGTAAGGTAAGAACAGCTTGCTTGTACCTACCTTCGGGTTTCCCGAAAGGGAAAACCGTATGTAAGCTTATCTGTTTAATATGAAGTAATTTTCCTTAAGTATTCCTGCACGTTTGTTCTAGACAAGTGTTTATGCTAAGGACCCTATAGGAGAAACCTCTTCGGTTTGTTCTCGTTTTTAGCCTGCATCTTGCATAGGCGTCTGGAGAATCGGTATCCGTAGAAAAGTGTTCCCTTCGGGTGGAACTGCCTGGGGAGACGATAAACTCTTAGCTAGAACAAGTGTGACTTGGAATATCTTGTTAAGTTGCTTCTAAAAAGATAGATAGGTGAGGCATACGGTAAGTACCGAGTAGGACTTTATATCATCTGAAGCAAGCTTCTGAGGCTGTCTAAATAGGATTCGCCACCCTGCAAAGATCCTAAAGTTAAAATATCTCTCGAAGTGAACAGTACTGAACAGTAATTTAAACAGTAAACTGAATAGTATTCAGCCGAATAAATAGT
>chr08:11155205-11157994R
---------------------------------------------------------------------------------------------------------------------------------------------------------------------------------------------------------------------------------------------------------------------------------------------------------------------------------------------------------------------------------------------------------------------------------------------------------------------------------------------------------------------------------------------------------------------------------------------------------------------------------------------------------------------------------------------------------------------------------------------------------------------------------------------------------------------------------------------------------------------------------------------------------------------------------------------------------------------------------------------------------------------------AAAAGCTATGGAATTGCCAGGTAAGACATCATGGGAAGATAGA------------------TATTTATTAAAAGCTACTAAAGATTTTGAATATATATGCA------------------------------------------------GGGAAATGGCTTCACAGAAGTCTGAATGGCTCACAAATATGAGTTC-ATGGAGACTGCCCCAACTGCCCAGAGGCCATGGAGAACGATTTAATCACAATTTCAGAATAACAGAGCTACAACAAGGGTTATTAAACCTCTTGTGGC-----------AAACAAAAAACAAAAAAGAAAAAGCTCATGCCTTAAATGGCTTGGCATATTATTTCAAAAA----------------------------TTTCGTGCCCTCAGATCAAAAGATAACAGAAAAAAGGGCTAAAATACAAGATATCCCTCATCATGAGGACAGGTTACTAGATTATCGCGAGGAGAAATCCCG--------------------------------------------------------------------------------------------------------------------------------------------------------------------------------------------------TGATGGCCAAGATAAACTTCCCATGGAAGTTGAACAATCTATGGCAACA------GATAAGAATACCAAGGTATTCTCAGATAAGATTTTGATCTCAGCA---GATCCTGCTTCGAGCATGGTTGCTTTCCACATAAATATCAATAACCTATTGCAATCTTTTCCACATA--ATAAACCATCATCATCCACAAAAAGGCATGATACCATTCCCCAAACACCATACATACTGCATAATCATCCTAATTTATTCCTTCCACAATATATACTCCGGACCCAGCCAAAAGCACCATGTAGATCTTGTGCCTACAAAGATTCTTGCAAAAAGAAACTTAAAAGCCAAAATCCCATGAGTACTACATACGAAAAT------------------CTCCAACCCAGATTAAGCTTCAAAACGGAACAAACTTTATCCTGCTTTGGGCAAGACATCCTCGATCTTGTTTGGCAAAAGTTTAAGGAGAGACAAATGAAAATATTCCTTGGACTCCAAGATTA--------------------------------------------------------------------------------------------------------------------TTTCTTTGATCTCTTAGAAGGGAGAGAAAGAAACCCAGCCATACGAGTAATCATATATATGCTCCCTCTCTTAAGACTAGATGAACAGGCAATTTCTGACCCATCCTATAGA----------------------------------TTCCTGGTTCTCAAAGCTGAGATAAATCTTCAAAGATTCCGGAACCTACCCACATACAACCATGA--------------AGAAATATCTCTCCAAACCATTATAGATCATGGTCTTGTGAATTCCATATATGCAACCCTCGATCAGATCCTTCAATCTGATTTAGGAAACGCTGTGGAAGATGTCTGCAGGAGACTTGGACATGGAAGATACAGGATTATCTTCTCCTCAATACCACCAAAATTCACACCACCTGTTCGTCCAGCAATTCAT--TATATATATATCATGAAGGGACAATTTAA-------------------TTTTCAAGAAGACGGTCTTAG----CAAACTATCGGATGAAGAGGAAGAAATATATACAACAGTTGCTAATCATGAAAATTGGAGATTATTTTCTGAAGCTGCAGAAATTGAAGAAGCTATCACC--------ACAGATTATGAATATCAGCTGGTTTTCCAAAACAAGATCACAAGGATTTTTATCAGCAAATTCTACAACCCAAGTTATGAATACTTCAAGGGAGCAGGGCGCATAATTAAACCGGATTTTGGAAATGAA---TGCTCCAAGAAA---AGTTACTACAGAAACCTGGCTC----AGTGGTTTCA-------GAAAACAGAGCCATCAGAGATTGACA-------CGGTACAATCAGCACCAATGATAATCAACGAAGATAATGAATAAAGATTTTGTCATCCCCGACAAAGATCACTATTCAAGATAAGGAATCTACACTATT-CAGATA------------------------------------------AGTATGGATCTTGGTGGTCATGGGCAGCCAGATGAATAGAATTCTTTAAGCTAAATATGTTTTTCAATATATATTGATAATAGAATATCAATAATTTGGGCGTGGAAGAAGAATAAACGAATTTCAGAAGACTACTCAAGAAGGAATACAGAAGAAGGAATCCAGAAGGACACCCTATAAAGCATAAAGGAACAATATAGGGT-------------------------------------------------GCGGTGAATGACATATCCCTGTGAAGAATAAAACTTTCGGT-GGAAAGGCCCCGGCTTTAGCTAGCTCTCGTGAATCCACAGTAGCGAAGAGATAAGCAGGAGACACAGGCGACGCCATCCCTGGCCTCTATAAAAGGAGACGTTGGCCTTCACTCCGAGGAGGAAGACACCATCCAGAGCAAAGCTTTCAAGCGCGCTCTCACCCTCCATTCCACCATTCTTAGTAGTAGTGACTTTAGCATACCTTGCATAGTATATTGAAGCAAGGAGTTGTGTAATAACGCTGTGTAAGGTAAGAACAGCTTGCTTGTACCTACCTTCGGGCTTCCCGAAAGGGAAAACCGTATGTAAGCTTATCTGTTTAATATGAAGTAATTTTCCTTAAGTATTCCTGCACGTTTGTTCTAGACAAGTGTTTATGCTAAGGACCCTATAGGAGAAACCTCTTCGGTTTGTTCTCGTTTTTAGCCTGCATCTTGCATAGGCGTCTGGAGAATCGGTATCCGTAGAGAAGTGTTCCCTTCGGGTGGAACTGCCTGGGGAGACGATAAACTCTTAGCTAGAACAAGTGTGACTTGGAATATCTTGTTAAGTTGCTTCTAAAAAGATAGATAGGTGAGGCATACGGTGAGTACCGAGTAGGACTTTACATCATCTGAAACAAGCTTCTGAGGCTGTCTAAGTAGGATTCGCCACCCTGCAAAGATCCTAAAGTTAAAATATCTCTCGAAGTGAACAGTATTGAACAGTAATTTAAACAGTAATTTGAATAGTAATCAGCCGAATAAACAGT
>chr08:11198926-11200223F
--------------------------------------------------------------------------------------------------------------------------------------------------------------------------------------------------------------------------------------------------------------------------------------------------------------------------------------------------------------------------------------------------------------------------------------------------------------------------------------------------------------------------------------------------------------------------------------------------------------------------------------------------------------------------------------------------------------------------------------------------------------------------------------------------------------------------------------------------------------------------------------------------------------------------------------------------------------------------------------------------------------------------------------------------------------------------------------------------------------------------------------------------------------------------------------------------------------------------------------------------------------------------------------------------------------------------------------------------------------------------------------------------------------------------------------------------------------------------------------------------------------------------------------------------------------------------------------------------------------------------------------------------------------------------------------------------------------------------------------------------------------------------------------------------------------------------------------------------------------------------------------------------------------------------------------------------------------------------------------------------------------------------------------------------------------------------------------------------------------------------------------------------------------------------------------------------------------------------------------------------------------------------------------------------------------------------------------------------------------------------------------------------------------------------------------------------------------------------------------------------------------------------------------------------------------------------------------------------------------------------------------------------------------------------------------------------------------------------------------------------------------------------------------------------------------------------------------------------------------------------------------------------------------------------------------------------------------------------------------------------------------------------------------------------------AATAAGATCACAAGGATTTTTATCAGCAAATTCTACAACCAAAGCTATGAATACTTCAAGGGAGCAGGGCGCATAATTAAACCGGATTTTGGAAATGAA---TGCTCCAAGAAA---AGTTACTACAGAAGCCTGGCTC----AGTGGTTTCA-------GAAAACAGAGCCATCAGAGATTGACA-------CGGTACAATCAGCACCAATGATAATCAACGAAGATAATGAATAAAGATTTTGTCATCCCCGACAAAGATCACAATTCAAGATAAGGAATCTATACTATTCCAGATA------------------------------------------AGTATGGATCTTGGTGGCCATGGGCAGCCAGATGAATAGAATTCTTTAAGCTAAATATGTTTTTCAATATATATTGATAATAGAATATCAATAATTTGGGCGTGGAAGAAGAATAAACGAATTTCAAAACACTACTCAAGAAAGGTTATCCAAGAAAGAATCCAGAAGGACACCCTATAAAGTATAAGGGGACAATATAGGAT-------------------------------------------------GCGGTGAATGACATATCCCTGTGAAGAATAAAACTTTCGGT-GGAAAGGCCTCGACTTCAGCAAGCTCTCGTGAATCCACAGTAGCGAAGAGATAAGCAGGAGACACAGGCGAAGCCATCCCTGGCCTCTATAAAAGGAAACAACAACGAAACAACGAAAAGAGAAGACACCATTCAGAGCAAAGCTTCCAAGCGCGCTCTCACCCTCCATTCCACCATTCTTAGTAGTAGTGACTTTAGACTACCTTGCATAGTATATTGAAGCAAGGAGGTGTGTTATAACGCTGTGTAAGGTAAGAACAGCTTGCTTGTACCTACCTTCGGGTTTCCCGAAAGGGAAAACCGTATGTAAGCTTATCTGTTTAATATGAAGTAATTTTCCTTAAGTATTCCTGCACGTTTGTTCTAGACAAGTGTTTATGCTAAGGACCCTATAGGAGAAACCTCTTCGGTTTGTTCTCGTTTTTAGCCTGCATCTTGCATAGGCGTCTGGAGAATCGGTATCCGTAGAGAAGTGTTCCCTTCGGGTGGAACTGCCTGGGGAGACGATAAACTCTTAGCTAGAACAAGTGTGGCTTGGAATATCTTTTTAAGTTGCTTCTAAAAAGACAGATAGGTGAGGCATACGGTGAGTACCGAGTAGGACTTTATATCATCTGAAGCAAGCTTCTGAGGCTGTCTAAATAGGATTCGCCACCCTGCAAAGATCCTAAAGTTAAAATATCTCTCGAAGTGAACAGTACTGAACAGT--------------ACTGAACAGTATTCAGCCGAATAAATAGT
>chr08:11211872-11214728F
------------------------------------------------------------------------------------------------------------------------------------------------------------------------------------------------------------------------------------------------------------------------------------------------------------------------------------------------------------------------------------------------------------------------------------------------------------------------------------------------------------------------------------------------------------------------------------------------------------------------------------------------------------------------------------------------------------------------------------------------------------------------------------------------------------------------------------------------------------------------------------------------------CCCAAAACCCGACAAACTCGACAACTTAGAAGTACCCAATCTTGAGTCTGAAGAAAGAATTAATGAATATGAGCTTAGTGAGAATATAGACAACTATTCTTTCTCATCATATCTTCCAAAATCTATAGAATTGCCAGGTAAGACATCATGGGAAGATAGA------------------TATTTATTAAAAGCTACTAAAGATTTTGAATATATATGCA------------------------------------------------GGGAAATGGCTTCACAGAAGTCTGAATGGCTCACAAATATGAGTTC-ATGGAGACTGCCCCAACTGCCCAGAGGCCATGGAGAACGATTTAATCACAATTTCAGAATAACAGAGCTACAACAAGGGTTATTAAATCTTTTGTGGC-----------AAACAAAAAACAAAAAAGAAAAAGCTCATGCCTTAAATAGCTTGGCATATTATTTCAAAAA----------------------------TTTCGTGCCCTCAGATCAAAAGATAACAGAAAAAAGGGCTAAAATGCAAGATATCCCTCATCATGGAGAAAGGTTACTAGATTATCGCGAGGAGAAATCCCG--------------------------------------------------------------------------------------------------------------------------------------------------------------------------------------------------TGATGGCCAAGATAAACTTCTCATGGAAGTCGAACAATCTATGGCAACA------GATAAGAATACCAAGGTATTCTCAGATAAGATTTTGATCTCAGCA---GATCCTGCTTCGAGCATGGTTGCTTTCCACATAAATATCAATAACCTATTGCAATCTTTCCCACATA--ATAAACCATCATCATCCACAAAAAGGCATGATATCATTCCCCAAACACCATACATACTGCATAATCATCCTAATTTATTCCTTCCACAATATATACTCCGGACTCAGCCAAAAGCACCATGTAGATCTTGTGCCTACAAAGATTCTTGCAAAAAGAAACTTAAAAGCCAAAATCCCATGAGTACTACATACGAAAAT------------------CTCCAACCCAGATTAAGCTTCAAAACGGAACAAACTTTATCCTGCTTTGGGCAAGACATCCTCGATCTTGTTTGGCAAAAGTTTAAGGAGAGACAAATGAAAATATTCCTTGGACTCCAAGATTA--------------------------------------------------------------------------------------------------------------------TTTCTTTGATCTTTTAGAAGGGAGAGAAAGAAACCCAGCCATACGAGTAATCATATATATGCTCCCTCTCTTAAGACTAGATAATCAGGCAATTTCTGACCCATCCTATAGA----------------------------------TTCCTGGTTCTCAAAGCTGAGATAAATCTTCAAAGATTCCGGAACCTACCCACATACAACCATGA--------------AGAAATATCTCTCCAAACCATTATAGATCATGGTCTTGTGAATTCCATATATGCAACCCTCGATCAGATCCTTCAATCTGATTTAGGAAATGCTGTGAAAGATGTCTGCAGGAGACTTGGACATGGAAGATACAGGATTATCTTCTCCTCAATACCACCAAAATTCACACCACCTGTTCGTCCAGCAATTCAT--TATATATATATCATGAAGGGACAATTTAA-------------------TTTTCAAGAAGACGGTCTTAG----CAAACTATCGGATGAAGAGGAAGAAATATATACAACAGTTGCTAATCATGAAAATTGGAGATTATTTTCTGAAGCTGCAGAAATTGAAGAAGCTATCACC--------ACAGATTATGAATATCAGCTGGTTTTCCAAAACAAGATCACAAGGATTTTTATCAGCAAATTCTACAACCAAAGTTATGAATACTTCAAGGGAGCAGGGCGCATAATTAAACCGGATTTTGGAAATGAA---TGCTCCAAGAAA---AGTTACTACAGAAACCTGGCTC----AGTGGTTTCA-------GAAAACAGAGCCATCAGAGATTGACA-------CGGTACAATCAGCACCAATGATAATCAACGAAGATAATGAATAAAGATTTTGTCATCCCCGACAAAGATCACTATTCAAGATAAGGAATCTACACTATT-CAGATA------------------------------------------AGTATGGATCTTGGTGGCCATGGGCAACCAGATGAATAAATTAATATAAGCTAAATATGTTTTTCAATATATATTGATAATAGAATATCAATAATTTGGGCGTGGAAGAAGAATAAACGAATTTCAGAAGACTACTCAAGAAGGAATCCAGAAGAAGGAATCCAGAAGGACACCCTATAAAGCATAAAGGAACAATATAGGGT-------------------------------------------------GCGGTGAATGACATATCCATGTGAAGAATAAAACTTTCGGT-GGAAAGGCCCCGGCTTTAGCTAGCTCTCGTGAATCCACAGTAGCGAAGAGATAAGCAGGAGACACAGGCGACGCCATCCCTGGCCTCTATAAAAGGAGACGTTGGCCTTCACTCCGAGGAGGAAGACACCATCCAGAGCAAAGCTTTCAAGCGCGCTCTCACCCTCCATTCCACCGTTCTTAGTAGTAGTGACTTTAGCCTACCTTGCATAGTATATTGAAGCAAGGAGTTGTGTAATAACGCTGTGTAAGGTAAGAACAGCTTGCTTGTACCTACCTTCGGGTTTCCCGAAAGGGAAAACCGTATGTAAGCTTATCTGTTTAATATGAAGTAATTTTCCTTAAGTATTCCTGCACGTTTGTTCTAGACAAGTGTTTATGCTAAGGACCCTATAGGAGAAACCTCTTCGGTTTGTTCTCGTTTTTAGCCTGCATCCTGCATAGGCGTCTGGAGAACCGGTATCCGTAGAGAAGTGTTCCCTTCGGGTGGAACTGCCTGGGGAGACGATAAACTCTTAGCTAGAACAAGTGTGACTTGGAATATCTTTTTAAGTTGCTTCTAAAAAGACAGATAGGTGAGGCATACGGTAAGTACCGAGTAGGACTTTACATCATCCGAAACAAGCTTCTGAGGCTGTCTAAATAGGATTCGCCACCCTGCAAAGATCCTAAAGTTAAAATATCTCTCGAAGTGAACAGTACTGAACAGTAATTTAAACAGTAAACTGAATAGTATTCAGCCGAATAAATAGT
>chr08:11180477-11186865F
GATGGATCAATTAAATTGTGAACATGATTGGATTAGAGGAAAGGGTGACTATAATATCAAATGTGCTTTTTGCATATATTATCCAAGTCAAGAAAATAGAGTGACTTGTAGTATATGTCTAAAACAAGCTTGTGCTGAATGTATAAAAGCAAATAAACAAAAATGGAGAAAAGAAATAGAATTAGAATCAGATGAAAAGACTTTATCTAGTAGAGTACGAGTGTTAGAAAATAGACTAAATAAACTAGAAGTAGAATTAGAGAACCTAAAAAATAATTGCGATATTAAGGCACTACCAGAGAATAAGGACATACAAAACACCGAATTTAAAGAGCAATTGATAACATTAAAAGACAGTAATACTGTTAAAATAATTCAACTAAGAGATGCCATAACTAATTTTGGAAATAAATATATAGTAAGATTGCCTTTCAAAGAAATATTAGGTATAAGAATCCCTGTTAAAATAAAATTGACACCCAAAGTATCTTATAAAATATTAGCACTAGTAGACACTGGGTGTACAAAGAATATTATTCATGACAAATATTTCACAAGATGTCCTGAAATAGTTCACACAATTGACGACAATAAGGCAGAAGTTTCCACAGACATGTCCGGAATAAAGAAAATTCATAATCAGTTAGCTTATAATATGGAGGTTTACATTAATGCAACTAAATATATAATAGATGAGATTACAATAAGAGATTTGTCAATGATTAATGATGACATGATAATTGGCCTAAGGTTCCTTCAACAATCAGTACAAACCACAGTAATACATGAGCAAGGAATTACTTTTATCCCATATCAAAATACTGTTCCATATATCTCAGAGGTACGAAAGCGTGGTGGAACCTCCCCCTCCCCAAAACCCGACAAACTCGACAACTTAGAAGTACCCAATCTCGAGCCTGAAGAAAGAATTAATGAATATGAGCTTAGTAAGAATATAGACAACTATTCTTTCTCATTATATCTTCCAAAATCTATAGAATTGCCAGGTAAGACATCATGGGAAGATAGA------------------TATTTATTAAAAGCTACTAAAGATTTTGAATATATATGCA------------------------------------------------GGGAAATGGCTTCACAGAAGTCTGAATGGCTCACAAATATGAGTTC-ATGGAGACTGCCCCAACTGCCCAGAGGCCATGGAGAACGATTTAATCACAATTTCAGAATAACAGAGCTACAACAAGGGTTATTAAACCTCTTGTGGC-----------AAACAAAAAACAAAAAAGAAAAAGCTCATGCCTTAAATGGCTTGGCATATTATTTCAAAAA----------------------------TTTCGTGCCCTCAGAACAAAAGATAACAGAAAAAAGGGCTAAAATGCAAGATATCCCTCATCATGAAGAAAGGTTACTAGATTATCGCGAGGAGAAATCCCG--------------------------------------------------------------------------------------------------------------------------------------------------------------------------------------------------TGATGGCCAAGATAAACTTCTCATGGAAGTCGAACAATCTATGGCAACA------GATAAGAATACCAAGGTATTCTCAGATAAGATTTTGATCTCAGCA---GATCCTGCTTCGAGCATGGTTGCTTTCCACATAAATATCAATAACCTATTGCAATCTTTCCCACATA--ATAAACCATCATCATCCACAAAAAGGCATGATATCATTCCCCAAACACCATACATACTGCATAATCATCCTAATTTATTCCTTCCACAATATATACTCCGGACTCAGCCAAAAGCACCATGTAGATCTTGTGCCTACAAAGATTCTTGCAAAAAGAAACTTAAAAGCCAAAATCCCATGAGTACTACATACGAAAAT------------------CTCCAACCCAGATTAAGCTTCAAGACGGAACAAACTTTATCCTGCTTTGGGCAAGACATCCTCGATCTTATTTGGCAAAAGTTTAAGGAGAGACAAATGAAAATATTCCTTGGACTCCAAGATTA--------------------------------------------------------------------------------------------------------------------TTTCTTTGATCTCTTAGAAGGGAGAGAAAGAAACCCAGCCATACGAGTAATCATATATATGCTCCCTCTCTTAAGACTAGATAATCAGGCAATTTCTGACCCATCCTATAGA----------------------------------TTCCTGGTTCTCAAAGCTGAGATAAATCTTCAAAGATTCCGGAACCTACCCACATACAACCATGA--------------AGAAATATCTCTCCAAACCATTATAGATCATGGTCTTGTGAATTCCATATATGCAACCCTCGATCAGATCCTTCAATCTGATTTAGGAAATGCTGTGAAAGATGTCTGCAGGAGACTTGGACATGGAAGATACAGGATTATCTTCTCCTCAATACCACCAAAATTCACACCACCTGTTCGTCCAGCAATTCAT--TATATATATATCATGAAGGGACAATTTAA-------------------TTTTCAAGAAGACGGTCTTAG----CAAACTATCGGATGAAGAGGAAGAAATATATACAACAGTTGCTAATCATGAAAATTGGAGATTATTTTCTGAAGCTGCAGAAATTGAAGAAGCTATCACC--------ACAGATTATGAATATCAGCTGGTTTTCCAAAACAAGATCACAAGGATTTTTATCAGCAAATTCTACAACCAAAGTTATGAATACTTCAAGGGAGCAGGGCGCATAATTAAACCGGATTTTGGAAATGAA---TGCTCCAAGAAA---AGTTACTACAGAAACCTGGCTC----AGTGGTTTCA-------GAAAACAGAGCCATCAGAGATTGACA-------CGGTACAATCAGCACCAATGATAATCAACGAAGATAATGAATAAAGATTTTGTCATCCCCGACAAAGATCACGATTCAAGATAAGGAATCTATACTATTCCAGATA------------------------------------------AGTATGGATCTTGGTGGCCATGGGCAACCAGATGAATAAATTAATATAAGCTAAATATGTTTTTCAATATATATTGATAATAGAATATCAATAATTTGGGCGTGGAAGAAGAATAAACGAATTTCAGAAGACTACTCAAGAAGGAATCCAGAAGAAGGAATCCAGAAGGACACCCTATAAAGCATAAAGGAACAATATAGGGT-------------------------------------------------GCGGTGAATGACATATCCCTGTGAAGAATAAAACTTTCGGT-GGAAAGGCCCCGGCTTTAGCTAGCTCTCGTGAATCCACAGTAGCGAAGAGATAAGCAGGAGACACAGGCGACGCCATCCCTGGCCTCTATAAAAGGAGACGTTGGCCTTCACTCCGAGGAGGAAGACACCATTCAGAGCAAAGCTTTCAAGCGCGCTCTCACCCTCCATTCCACCGTTCTTAGTAGTAGTGACTTTAGCCTACCTTGCATAGTATATTGAAGCAAGGAGTGGTGTAATAACGCTGTGTAAGGTAAGAACAGCTTGCTTGTACCTACCTTCGGGTTTCCCGAAAGGGAAAACCGTATGTAAGCTTATCTGTTTAATATGAAGTAATTTTCCTTAAGTATTCCTGCACGTTTGTTCTAGACAAGTGTTTATGCTAAGGACCCTATAGGAGAAACCTCTTCGGTTTGTTCTCGTTTTTAGCCTGCATCTTGCATAGGCGTCTGGAGAATCGGTATCCGTAGAGAAGTGTTCCCTTCGGGTGGAACTGCCTGGGGAGACGATAAACTCTTAGCTAGAACAAGTGTGACTTGGAATATCTTGTTAAGTTGCTTCTAAAAAGATAGATAGGTGAGGCATACGGTAAGTACCGAGTAGGACTTTACATCATCCGAAACAAGCTTCTGAGGCTGTCTAAATAGGATTCGCCACCCTGCAAAGATCCTAAAGTTAAAATATCTCTCGAAGTGAACAGTATTGAACAGTAATTTAAACAGTAACTTGAATAGTAATCAGCCGAATAAACAGT
>chr08:11227503-11234349F
GATGGATCAATTAAATTGTGAACATGATTGGATTAGAGGAAAGGGTGACTATAATATCAAATGTGCTTTTTGCATATATTATCCAAGTCAAGAAAATAGAGTGACTTGTAGTATATGTCTAAAACAAGCTTGTGCTGAATGTATAAAAGCAAATAAACAAAAATGGAGAAAAGAAATAGAATTAGAATCAGATGAAAAGACTTTATCTAGTAGAGTACGAGTGTTAGAAAATAGACTAAATAAACTAGAAGTAGAATTAGAGAACCTAAAAAATAATTGCGATATTAAGGCACTACCAGAGAATAAGGACATACAAAACACCGAATTTAAAGAGCAATTGATAACATTAAAAGACAGTAATACTGCTAAAATAATTCAACTAAGAGATGCCATAACTAATTTTGGAAATAAATATATAGTAAGATTGCCTTTCAAAGAAATATTAGGTATAAGAATCCCTGTTAAAATAAAATTGACACCCAAAGTATCTTATAAAATATTAGCACTAGTAGACACTGGGTGTACAAAGAATATTATTCATGACAAATATTTCACAAGATGTCCTGAAATAGTTCACACAATTGACGACAATAAGGCAGAAGTTTCCACAGACATGTCCGGAATAAAGAAAATTCATAATCAGTTAGCTTATAATATGGAGGTTTACATTAATGCAACTAAATATATAATAGATGAGATTACAATAAGAGATTTGTCAATGATTAATGATGACATGATAATTGGCCTAAGGTTCCTTCAACAATCAGTACAAACCACAGTAATACATGAGCAAGGAATTACTTTTATCCCATATCAAAATACTGTTCCATATATCTCAGAGGTACGAAAGCGTGGTGGAACCTCCCCCTCCCCAAAACCCGACAAACTCGACAACTTAGAAGTACCCAATCTTGAGTCTGAAGAAAGAATTAATGAATATGAGCTTAGTGAGAATATAGACAACTATTCTTTCTCATCATATCTTCCAAAATCTATAGAATTGCCAGGTAAGACATCATGGGAAGATAGA------------------TATTTATTAAAAGCTACTAAAGATTTTGAATATATATGCA------------------------------------------------GGGAAATGGCTTCACAGAAGTCTGAATGGCTCACAAATATGAGTTC-ATGGAGACTGCCCCAACTGCCCAGAGGCCATGGAGAACGATTTAATCACAATTTCAGAATAACAGAGCTACAACATGGGTTATTAAATCTTTTGTGGC-----------AAACAAAAAACAAAAAAGAAAAAGCTCATGCCTTAAATAGCTTGGCATATTATTTCAAAAA----------------------------TTTCGTGCCCTCAGATCAAAAGATAACAGAAAAAAGGGCTAAAATGCAAGATATCCCTCATCATGAAGAAAGGTTACTAGATTATCGCGAGGAGAAATCCCG--------------------------------------------------------------------------------------------------------------------------------------------------------------------------------------------------TGATGGCCAAGATAAACTTCTCATGGAAGTCGAACAATCTATGGCAACA------GATAAGAATACCAAGGTATTCTCAGATAAGATTTTGATCTCAGCA---GATCCTGCTTCGAGCATGGTTGCTTTCCACATAAATATCAATAACCTATTGCAATCTTTCCCACATA--ATAAACCATCATCATCCACAAAAAGGCATGATATCATTCCCCAAACACCATACATACTGCATAATCATCCTAATTTATTCCTTCCACAATATATACTCCGGACTCAGCCAAAAGCACCATGTAGATCTTGTGCCTACAAAGATTCTTGCAAAAAGAAACTTAAAAGCCAAAATCCCATGAGTACTACATACGAAAAT------------------CTCCAACCCAGATTAAGCTTCAAAACGGAACAAACTTTATCCTGCTTTGGGCAAGACATCCTCGATCTTGTTTGGCAAAAGTTTAAGGAGAGACAAATGAAAATATTCCTTGGACTCCAAGATTA--------------------------------------------------------------------------------------------------------------------TTTCTTTGATCTTTTAGAAGGGAGAGAAAGAAACCCAGCCATACGAGTAATCATATATATGCTCCCTCTCTTAAGACTAGATAATCAGGCAATTTCTGACCCATCCTATAGA----------------------------------TTCCTGGTTCTCAAAGCTGAGATAAATCTTCAAAGATTCCGGAACCTACCCACATACAACCATGA--------------AGAAATATCTCTCCAAACCATTATAGATCATGGTCTTGTGAATTCCATATATGCAACCCTCGATCAGATCCTTCAATCTGATTTAGGAAATGCTGTGAAAGATGTCTGCAGGAGACTTGGACATGGAAGATACAGGATTATCTTCTCCTCAATACCACCAAAATTCACACCACCTGTTCGTCCAGCAATTCAT--TATATATATATCATGAAGGGACAATTTAA-------------------TTTTCAAGAAGACGGTCTTAG----CAAACTATCGGATGAAGAGGAAGAAATATATACAACAGTTGCTAATCATGAAAATTGGAGATTATTTTCTGAAGCTGCAGAAATTGAAGAAGCTATCACC--------ACAGATTATGAATATCAGCTGGTTTTCCAAAACAAGATCACAAGGATTTTTATCAGCAAATTCTACAACCAAAGTTATGAATACTTCAAGGGAGCAGGGCGCATAATTAAACCGGATTTTGGAAATGAA---TGCTCCAAGAAA---AGTTACTACAGAAACCTGGCTC----AGTGGTTTCA-------GAAAACAGAGCCATCAGAGATTGACA-------CGGTACAATCAGCACCAATGATAATCAACGAAGATAATGAATAAAGATTTTGTCATCCCCGACAAAGATCACGATTCAAGATAAGGAATCTATACTATTCCAGATA------------------------------------------AGTATGGATCTTGGTGGCCATGGGCAACCAGATGAATAAATTAATATAAGCTAAATATGTTTTTCAATATATATTGATAATAGAATATCAATAATTTGGGCGTGGAAGAAGAATAAACGAATTTCAGAAGACTACTCAAGAAGGAATCCAGAAGAAGGAATCCAGAAGGACACCCTATAAAGCATAAAGGAACAATATAGGGT-------------------------------------------------GCGGTGAATGACATATCCCTGTGAAGAATAAAACTTTCGGT-GGAAAGGCCCCGGCTTTAGCTAGCTCTCGTGAATCCACAGTAGCGAAGAGATAAGCAGGAGACACAGGCGACGCCATCCCTGGCCTCTATAAAAGGAGACGTTGGCCTTCACTCCGAGGAGGAAGACACCATTCAGAGCAAAGCTTTCAAGCGCGCTCTCACCCTCCATTCCACCGTTCTTAGTAGTAGTGACTTTAGCCTACCTTGCATAGTATATTGAAGCAAGGAGTTGTGTAATAACGCTGTGTAAGGTAAGAACAGCTTGCTTGTACCTACCTTCGGGTTTCCCGAAAGGGAAAACCGTATGTAAGCTTATCTGTTTAATATGAAGTAATTTTCCTTAAGTATTCCTGCACGTTTGTTCTAGACAAGTGTTTATGCTAAGGACCCTATAGGAGAAACCTCTTCGGTTTGTTCTCGTTTTTAGCCTGCATCTTGCATAGGCGTCTGGAGAATCGGTATCCGTAGAGAAGTGTTCCCTTCGGGTGGAACTGCCTGGGGAGACGATAAACTCTTAGCTAGAACAAGTGTGACTTGGAATATCTTTTTAAGTTGCTTCTAAAAAGACAGATAGGTGAGGCATACGGTGAGTACCGAGTAGGACTTTATATCATCTGAAACAAGCTTCTGAGGCTGTCTAAATAGGATTCGCCACCCTGCAAAGATCCTAAAGTTAAAATATCTCTCGAAGTGAACAGTAGTGAACAGTAATTTAAACAGTAAACTGAATAGTATTCAGCCGAATAAATAGT
>chr08:11187207-11194062F
GATGGATCAATTAAATTGTGAACATGATTGGATTAGAGGAAAGGGTGACTATAATATCAAATGTGCTTTTTGCATATATTATCCAAGTCAAGAAAATAGAGTGACTTGTAGTATATGTCTAAAACAAGCTTGTGCTGAATGTATAAAAGCAAATAAACAAAAATGGAGAAAAGAAATAGAATTAGAATCAGATGAAAAGACTTTATCTAGTAGAGTACGAGTGTTAGAAAATAGACTAAATAAACTAGAAGTAGAATTAGAGAACCTAAAAAATAATTGCGATATTAAGGCACTACCAGAGAATAAGGACATACAAAACACCGAATTTAAAGAGCAATTGATAACATTAAAAGACAGTAATACTGCTAAAATAATTCAACTAAGAGATGCCATAACTAATTTTGGAAATAAATATATAGTAAGATTGCCTTTCAAAGAAATATTAGGTATAAGAATCCCTGTTAAAATAAAATTGACACCCAAAGTATCTTATAAAATATTAGCACTAGTAGACACTGGGTGTACAAAGAATATTATTCATGACAAATATTTCACAAGATGTCCTGAAATAGTTCACACAATTGACGACAATAAGGCAGAAGTTTCCACAGACATGTCCGGAATAAAGAAAATTCATAATCAGTTAGCTTATAATATGGAGGTTTACATTAATGCAACTAAATATATAATAGATGAGATTACAATAAGAGATTTGTCAATGATTAATGATGACATGATAATTGGCCTAAGGTTCCTTCAACAATCAGTACAAATCACAGTAATACATGAGCAAGGAATTACTTTTATCCCATATCAAAATACTGTTCCATATATCTCAGAGGTACGAAAGCGTGGTGGAACCTCCCCCTCCCCAAAACCCGACAAACTCGACAACTTAGAAGTACCCAATCTTGAGTCTGAAGAAAGAATTAATGAATATGAGCTTAGTGAGAATATAGACAACTATTCTTTCTCATCATATCTTCCAAAATCTATAGAATTGCCAGGTAAGACATCATGGGAAGATAGA------------------TATTTATTAAAAGCTACTAAAGATTTTGAATATATATGCA------------------------------------------------GGGAAATGGCTTCACAGAAGTCTGAATGGCTCACAAATATGAGTTC-ATGGAGACTGCCCCAACTGCCCAGAGGCCATGGAGAACGATTTAATCACAATTTCAGAATAACAGAGCTACAACAAGGGTTATTAAATCTTTTGTGGC-----------AAACAAAAAACAAAAAAGAAAAAGCTCATGCCTTAAATGGCTTGGCATATTATTTCAAAAA----------------------------TTTCGTGCCCTCAGATCAAAAGATAACAGAAAAAAGGGCTAAAATGCAAGATATCCCTCATCATGAAGAAAGGTTACTAGATTATCGCGAGGAGAAATCCCG--------------------------------------------------------------------------------------------------------------------------------------------------------------------------------------------------TGATGGCCAAGATAAACTTCTCATGGAAGTCGAACAATCTATGGCAACA------GATAAGAATACCAAGGTATTCTCAGATAAGATTTTGATCTCAGCA---GATCCTGCTTCGAGCATGGTTGCTTTCCACATAAATATCAATAACCTATTGCAATCTTTCCCACATA--ATAAACCATCATCATCCACAAAAAGGCATGATATCATTCCCCAAACACCATACATACTGCATAATCATCCTAATTTATTCCTTCCACAATATATACTCCGGACTCAGCCAAAAGCACCATGTAGATCTTGTGCCTACAAAGATTCTTGCAAAAAGAAACTTAAAAGCCAAAATCCCATGAGTACTACATACGAAAAT------------------CTCCAACCCAGATTAAGCTTCAAAACGGAACAAACTTTATCCTGCTTTGGGCAAGACATCCTCGATCTTGTTTGGCAAAAGTTTAAGGAGAGACAAATGAAAATATTCCTTGGACTCCAAGATTA--------------------------------------------------------------------------------------------------------------------TTTCTTTGATCTTTTAGAAGGGAGAGAAAGAAACCCAGCCATACGAGTAATCATATATATGCTCCCTCTCTTAAGACTAGATAATCAGGCAATTTCTGACCCATCCTATAGA----------------------------------TTCCTGGTTCTCAAAGCTGAGATAAATCTTCAAAGATTCCGGAACCTACCCACATACAACCATGA--------------AGAAATATCTCTCCAAACCATTATAGATCATGGTCTTGTGAATTCCATATATGCAACCCTCGATCAGATCCTTCAATCTGATTTAGGAAATGCTGTGAAAGATGTCTGCAGGAGACTTGGACATGGAAGATACAGGATTATCTTCTCCTCAATACCACCAAAATTCACACCACCTGTTCGTCCAGCAATTCAT--TATATATATATCATGAAGGGACAATTTAA-------------------TTTTCAAGAAGACGGTCTTAG----CAAACTATCGGATGAAGAGGAAGAAATATATACAACAGTTGCTAATCATGAAAATTGGAGATTATTTTCTGAAGCTGCAGAAATTGAAGAAGCTATCACC--------ACAGATTATGAATATCAGCTGGTTTTCCAAAACAAGATCACAAGGATTTTTATCAGCAAATTCTACAACCCAAGTTATGAATACTTCAAGGGAGCAGGGCGCATAATTAAACCGGATTTTGGAAATGAA---TGCTCCAAGAAA---AGTTACTACAGAAACCTGGCTC----AGTGGTTTCA-------GAAAACAGAGCCATCAGAGATTGACA-------CGGTACAATCAGCACCAATGATAATCAACGAAGATAATGAATAAAGATTTTGTCATCCCCGACAAAGATCACTATTCAAGATAAGGAATCTACACTATT-CAGATA------------------------------------------AGTATGGATCTTGGTGGTCATGGGCAGCCAGATGAATAGAATTCTTTAAGCTAAATATGTTTTTCAATATATATTGATAATAGAATATCAATAATTTGGGCGTGGAAGAAGAATAAACGAATTTCAGAAGACTACTCAAGAAGGAATCCAGAAGAAGGAATCCAGAAGGACACCCTATAAAGCATAAAGGAACAATATAGGGT-------------------------------------------------GCGGTGAATGACATATCCCTGTGAAGAATAAAACTTTCGGT-GGAAAGGCCCCGGCTTTAGCTAGCTCTCGTGAATCCACAGTAGCGAAGAGATAAGCAGGAGACACAGGCGACGCCATCCCTGGCCTCTATAAAAGGAGACGTTGGCCTTCACTCCGAGGAGGAAGACACCATTCAGAGCAAAGCTTTCAAGCGCGCTCTCACCCTCCATTCCACCGTTCTTAGTAGTAGTGACTTTAGCCTACCTTGCATAGTATATTGAAGCAAGGAGTGGTGTAATAACGCTGTGTAAGGTAAGAACAGCTTGCTTGTACCTACCTTCGGGTTTCCCGAAAGGGAAAACCGTATGTAAGCTTATCTGTTTAATATGAAGTAATTTTCCTTAAGTATTCCTGCACGTTTGTTCTAGACAAGTGTTTATGCTAAGGACCCTATAGGAGAAACCTCTTCGGTTTGTTCTCGTTTTTAGCCTGCATCCTGCATAGGCGTCTGGAGAACCGGTATCCGTAGAGAAGTGTTCCCTTCGGGTGGAACTGTCTGGGGAGACGATAAACTCTTAGCTAGAACAAGTGTGACTTGGAATATCTTTTTAAGTTGCTTCTAAAAAGACAGATAGGTGAGGCATACGGTAAGTACCGAGTAGGACTTTACATCATCCGAAACAAGCTTCTGAGGCTGTCTAAATAGGATTCGCCACCCTGCAAAGATCCTAAAGTTAAAATATCTCTCGAAGTGAACAGTACTGAACAGTAATTTAAACAGTAAACTGAATAGTATTCAGCCGAATAAATAGT
>chr09:14493662-14495268F
-----------------------------------------------------------------------------------------------------------------------------------------------------------------------------------------------------------------------------------------------------------------------------------------------------------------------------------------------------------------------------------------------------------------------------------------------------------------------------------------------------------------------------------------------------------------------------------------------------------------------------------------------------------------------------------------------------------------------------------------------------------------------------------------------------------------------------------------------------------------------------------------------------------------------------------------------------------------------------------------------------------------------------------------------------------------------------------------------------------------------------------------------------------------------------------------------------------------------------------------------------------------------------------------------------------------------------------------------------------------------------------------------------------------------------------------------------------------------------------------------------------------------------------------------------------------------------------------------------------------------------------------------------------------------------------------------------------------------------------------------------------------------------------------------------------------------------------------------------------------------------------------------------------------------------------------------------------------------------------------------------------------------------------------------------------------------------------------------------------------------------------------------------------------------------------------------------------------------------------------------------------------------------------------------------------------------------------------------------------------------------------------------------------------------------------------------------------------------------------------------------------------------------------------------------------------------------------------------------------------------------------------------------------------------------------------------------------------------------------------------------CTTGGACATGGAAGATACAGGATTATCTTCTCCTCAATACCACCAAAATTCACACCACCTGTTCGTCCAGCAATTCAT--TATATATATATCATGAAGGGACAATTTAA-------------------TTTTCAAGAAGACGGTCTTAG----CAAACTATCGGATGAAGAGGAAGAAATATATACAACAGTTGCTAATCATGAAAATTGGAGATTATTTTCTGAAGCTGCAGAAATTGAAGAAGCTATCACC--------ACAGATTATGAATATCAGCTGGTTTTCCAAAACAAGATCACAAGGATTTTTATCAGCAAATTCTACAACCAAAGTTATGAATACTTCAAGGGAGCAGGGCGCATAATTAAACCGGATTTTGGAAATGAA---TGCTCCAAGAAA---AGTTACTACAGAAGCCTGGCTC----AGTGGTTTCA-------GAAAACAGAACCATCAGAGATTGACA-------CGGTACAATCAGCACCAATGATAATCAACGAAGATAATGAATAAAGATCTTGTCATCCCCGACAAAGATCACTATTCAAGATCAGGAATCTACACTATTCCAGATA------------------------------------------ACAATGGATCTTGGTGGCCATGGGCAGCCAGATGAATAGAATTCTTTAAGCTAAATATGTTTTTCAATATATATTGATAATAGAATATCAATAATTTGGGCGTGGAAGAAGAATAAACGAATTTCAGAAGACTACTCAAGAAGGAATCCAGAAGAAGGAATCCAGAAAGACACCCTATAAAGCATAAAGGAACAATATAGGGT-------------------------------------------------GCGGTGAATGACATATCCCTGTGAAGAATAAAACTTTCGGT-GGAAAGGCCTCGACTTTAGCTAGCTCTCGTGAATCCACAGTAGCGAAGAGATAAGCAGGAGACACAGGCGAAGCCATCTCTGGCCTCTATAAAAGGAGACGTTGGCCTTCACTCCGAAGACGAAGACACCATTCAGAGCAAAGCTTCCAAGCGCGCTCTCACCCTCCATTCCACCGTTCTTAGTAGTAGTGACTTTAGCCTACCTTGCATAGTATATTGAAGCAAGGAGTTGTGTTATAACGCTGTGTAAGGTAAGAACAGCTTGCTTGTACCTACCTTCGGGTTTCCCGAAAGGGAAAACCGTATGTAAGCTTATCTGTTTAATATGAAGTAATTTTCCTTAAGTATTCCTGCACGTTTGTTCTAGACAAGTGTTTATGCTAAGGACCCTATAGGAGAAACCTCTTCGGTTTGTTCTCGTTTTTAGCCTGCATCTTGCATAGGCGTCTGGAGAATCGGTATCCGTAGAGAAGTGTTCCCTTCGGGTGGAACTGCCTGGGGAGACGATAAACTCTTAGCTAGAACAAGTGTGGCTTGGAATATCTTTTTAAGTTGCTTCTAAAAAGACAGATAGGTGAGGCATACGGTGAGTACCGAGTAGGACTTTATATCATCTGAAGCAAGCTTCTGAGGCTGTCTAAATAGGATTCGCCACCCTGCAAAGATCCTAAAGTTAAAATATCTCTCGAAGTGAACAGTATTGAACAGTAATTTAAACAGTAATTTGAATAGTAATCAGCCGAATAAACAGT
>chr10:22712881-22719732R
GATGGATCAGTTAAATTGTGAACATGATTGGATTAGAGGAAAAGGAGATTATAACATTAAATGTGCTTTTTGCATCTATTACCCAAGCCAAGATAATAGAGTAACCTGTAGTATATGCTTAAAACAAGCTTGTGCTGAATGTATAAAAGCAAATAAACAAAAATGGAGAAAAGAGATAGAATTAGAATCAGATGAAAGGATATTATCTAGTAGAGTACGAGTTTTAGAAAACAGAATAAATAAACTAGAAGTGGAACTAGAGAATCTAAAAATTAACTATGATATTAAGGCATTACCAGAAAATAAGGATATACAAAATACCGAATTTAAAGAGCAAGTGATAACATTAAAAGACAGTAATACTGCTAAAATAATTCAACTAAAAGATGCCATAACTAATTTTGGAAATAAATATATAGTAAAACTGCCTTTCAAAGAAATTTTGGGAATAAGAATACCGGTAAAAGTAAAACTATCACCCAAGGTATCATATAAAATTCTAGCACTAGTAGACACTGGGTGTACAAAAAATATTATTCATGATAAGTACTTCATAAAATGTCCAGAAATAGTTCATACAATTGATGATAATAAGGCAGAAGTCTCTACAGACATGTCCGGAATAAAGAAAATTCATAATCAGCTAGCTCATAATGTTGAAGTATACATTAATGGAACTAAATATATAATAGATGAGATTACAATAAGAAACTTATCCATGATAAGTGATGACATGATAATTGGCCTAAGGTTTTTACAACAATCGGTACAAACCACAGTAATACATGAGCAAGGAATTACTTTTATCCCATATCAAAACAATGTGCCATATATCTCAGAGGTACGAAAGCGTGGTGGAGCCAGAAT---------------CAAACCCGACAACCTTGAAGCACTTAATCTTGAGTCTGAAGAAAGAATTAATGAATATGAGCTTAGTGAGAATATAGACAACTATTCTTTCTCATCATATCTTCCAAAATCTATGGAATTGCCAGGTAAGACATCATGGGAAGATAGA------------------TATTTATTAAAAGCTACTAAAGATTTTGAATATATATGCA------------------------------------------------GGGAAATGGCTTCACAGAAGTCTGAATGGCTCACAAATATGAGTTC-ATGGAGACTGCCCCAACTGCCTAGAGGCCATGGAGAACGATTTAATCACAATTTCAGAATAACAGAGCTACAACAAGGGTTATTAAACCTCTTGTGGC-----------AAACAAAAAACAAAAAAGAAAAAGCTCATGCCTTAAATGGCCTGGCATATTATTTCAAAAA----------------------------TTTCGTGCCCTCAGATCAAAAGATAACAGAAAAAAGGGCTAAAATACAAGATATCCCTCATCATGAGGAAAGGTTACTAGATTATCGCGAGGAGAAATCCCG--------------------------------------------------------------------------------------------------------------------------------------------------------------------------------------------------TGATGGCCAAGATAAACTTCCCATGGAAGTTGAACAATCTATGGCAACA------GATAAGAATACCAAGGTATTCTCAGATAAGATTTTGATCTCAGCA---GATCCTGCTTCGAGCATGGTTGCTTTCCACATAAATATCAATAACCTATTGCAATCTTTTCCACATA--ATAAACCATCATCATCCACAAAAAGGCATGATACCATTCCCCAAACACCATACATACTGCATAATCATCCTAATTTATTCCTTCCACAATATATACTCCGGACCCAGCCAAAAGCACCATGTAGATCTTGTGCCTACAAAGATTCTTGCAAAAAGAAACTTAAAAGCCAAAATCCCATGAGTACTACATACGAAAAT------------------CTCCAACCCAGATTAAGCTTCAAAACGGAACAAACTTTATCCTGCTTTGGGCAAGACATCCTCGATCTTGTTTGGCAAAAGTTTAAGGAGAGACAAATGAAAATATTCCTTGGACTCCAAGATTA--------------------------------------------------------------------------------------------------------------------TTTCTTTGATCTCTTAGAAGGGAGAGAAAGAAACCCAGCCATACGAGTAATCATATATATGCTCCCTCTCTTAAGACTAGATGATCAGGCAATTTCTGACCCATCCTATAGA----------------------------------TTCCTGGTTCTCAAAGCTGAGATAAATCTTCAAAGATTCCGGAACCTACCCACATACAACCATGA--------------AGAAATATCTCTCCAAACCATTATAGATCATGGTCTTGTGAATTCCATATATGCAACCCTCGATCAGATCCTTCAATCTGATTTAGGAAACGCTGTGAAAGATGTATGCAGGAGACTTGGACATGGAAGATACAGGATTATCTTCTCCTCAATACCACCAAAATTCACACCACCTGTTCGTCCAGCAATTCAT--TATATATATATCATGAAGGGACAATTTAA-------------------TTTTCAAGAAGACGGTCCTAG----CAAACTATCGGATGAAGAGGAAGAAATATATACAACAGTTGCTAATCATGAAAATTGGAGATTATTTTCTGAAGCTGCAGAAATTGAAGAAGCTATCACC--------ACAGATTATGAATATCAGCTGGTTTTCCAAAACAAGATCACAAGGATTTTTATCAGCAAATTCTACAACCAAAGTTATGAATACTTCAAGGGAGCAGGGCGCATAATTAAACCGGATTTTGGAAATGAA---TGCTCCAAGAAA---AGTTACTACAGAAGCCTGGCTC----AGTGGTTTCA-------GAAAACAGAGCCATCAGAGATTGACA-------CGGTGCAATCAGCACCAATGATAATCAACGAAGATAATGAATAAAGATCTTGTCATCCCCGACAAAGATCACTATTCAAGATAAGGAATCTACACTATTCCAGATA------------------------------------------AGTATGGATCTTGGTGGTCATGGGCAGCCAGATGAATAGAATTCTTTAAGCTAAATATGTTTTTCAATATATATTGATAATAGAATATCAATAATTTGGGCGTGGAAGAAGAAAAAACGAATTTCAGAAGACTACTCAAGGAGGAATCCAGAAGAAGGAATCCAGAAGGACACCCTAT-AAGCATAAAGGAACAATATAGGGT-------------------------------------------------GCGGTGAATGACATATCACTGTGAAGAGTAAAACTTTCGGT-GAAAAGGCCTCGACTTTAGCCAGCTCCCGTGAAGATACAGTAGCGAAGAGATAAGCAGGAGGCACAGGCGACGCCATCCCTGGCCTCTATAAAAGGAGACGTTGGCCTTCACTCCGGAGACGAAGACACCATTCAGAGCAAAGCTTCCAAGCGCGCTCTCACCCTCCATTCCACCGTTCTTAGTAGTAGTGACTTTAGCCTACCTTGCATAGTATATTGAAGCAAGGAGTTGTGTAATAACGCTGTGTAAGGTAAGAACAGCTTGCTTGTACCTACCTTCGGGTTTCCCGAAAGGGAAAACCGTATGTAAGCTTATCTGTTTAATATGAAGTAATTTTCCTTAAGTATTCCTGCACGTTTGTTCTAGACAAGTGTTTATGCTAAGGACCCTATAGGAGAAACCTCTTCGGTTTGTTCTCGTTTTTAGCCTGCATCTTGCATAGGCGTCTGGAGAATCGGTATCCGTAGAGAAGTGTTCCCTTTGGGTGGAACTGCCTGGGGAGACGATAAACTCTTAGCTAGAACAAGTGTGACTTGGAATATCTTGTTAAGTTGCTTCTAAAAAGATAGATAGGTGAGGCATACGGTGAGTACCGAGTAGGACTTTACATCATCCGAAGCAAGCTTCTAAGGCTGTCTAAATAGGATTCGCCACCCTGCAAAGATCCTAAAGTTAAAATATCTCTCGAAG----------TGAACAGTAATTTAAACAGTAATTTGAATAGTAATCAGCCGAATAAACAGT
>chr11:9620949-9626981R
GATGGATCAATTAAATTGTGAACATGATTGGATTAGAGGAAAGGGTGACTATAATATCAAATGTGCTTTTTGCATATATTACCCTAGTCAAGAAAATAGAGTGACTTGTAGTATATGTCTAAAACAAGCTTGTGCTGAATGTATAAAAGCAAATAAACAAAAATGGAGAAAAGAAATAGAATTAGAATCAGATGAAAAGATTTTATCTAGTAGAGTACGAGTGTTAGAAAATAGACTAAATAAATTAGAAATAGAATTAGAGAACCTAAAAAATAATTGTGATATTAAAGCATTACCAGAAAATAAGGACATACAAAACACCGAATTTAAAGAGCAATTGATAACACTAAAAGACAGTAATACTGCTAAAATAATTCAACTAAGAGATGCCATAACTAATTTTGGAAATAAATATATAGTAAGATTGCCTTTCAAAGAAATATTAGGTATAAGAATCCCTGTTAAAGTAAAATTGACACCCAAAGTATCTTATAAAATATTAGCACTAGTAGACACTGGGTGTACAAAGAATATTATTCATGACAAATATTTCACAAGATGTCCTGAAATAGTTCACACAATTGACGACAATAAGGCAGAAGTTTCCACAGACATGTCCGGAATAAAGAAAATTCATAATCAGTTAGCTTATAATATGGAGGTTTACATTAATGCAACTAAATATATAATAGATGAGATTACAATAAGAGATTTGTCAATGATTAATGATGACATGATAATTGGCCTAAGGTTCCTTCAACAATCAGTACAAACCACAGTAATACATGAGCAAGGAATTACTTTTATCCCATATCAAAATAATGTTCCATATATCTCAGAGGTACGAAAGTGTGGTGGAGTCTCCCC---------------CAAACTCGACAACTTAGAAGTACCTAATCTTGAGTCTGAAGAAAGAATTAATGAATATGAGCTTAGTGAGAATATAGACAACTATTCTTTCTCATCATATCTTCCAAAATCTATGGAATTGCCAGGTAAGACATCATGGGAAGATAGA------------------TATTTATTAAAAGCTACTAAAGATTTTGAATATATATGCA------------------------------------------------GGGAAATGGCTTCACAGAAGTCTGAATGGCTCACAAATATGAGTTC-ATGGAGACTGCCCCAACTGCCCAGAGGCCATGGAGAACGATTTAATCACAATTTCAGAATAACAGAGCTACAACAAGGGTTATTAAACCTCTTGTGGC-----------AAACAAAAAACAAAAAAGAAAAAGCTCATGCCTTAAATGGCCTGGCATATTATTTCAAAAA----------------------------TTTCGTGCCCTCAGATCAAAAGATAACAGAAAAAAGGGCTAAAATACAAGATATCCCTCATCATGAGGAAAGGTTACTAGATTATCGCGAGGAGAAATCCCG--------------------------------------------------------------------------------------------------------------------------------------------------------------------------------------------------TGATGGCCAAGATATACTTCCCATGGAAGTTGAACAATCTATGGCAACA------GATAAGAATACCAAGGTATTCTCAGATAAGATTTTGATCTCAGCA---GATCCTGCTTCGAGCATGGTTGCTTTCCACATAAATATCAATAACCTATTGCAATCTTTTCCACATA--ATAAACCATCATCATCCACAAAAAGGCATGATACCATTCCCCAAACACCATACATACTGCATAATCATCCTAATTTATTCCTTCCACAATATATACTCCGGACCCAGCCAAAAGCACCATGTAGATCTTGTGCCTACAAAGATTCTTGCAAAAAGAAACTTAAAAGCCAAAATCCCATGAGTACTACATACGAAAAT------------------CTCCAACCCAGATTAAGCTTCAAAACGGAACAAACTTTATCCTGCTTTGGGCAAGACATCCTCGATCTTGTTTGGCAAAAGTTTAAGGAGAGACAAATGAAAATATTCCTTGGACTCCAAGATTA--------------------------------------------------------------------------------------------------------------------TTTCTTTGATCTCTTAGAAGGGAGAGAAAGAAACCCAGCCATACGAGTAATCATATATATGCTCCCTCTCTTAAGACTAGATGAACAGGCAATTTCTGACCCATCCTATAGA----------------------------------TTCCTGGTTCTCAAAGCTGAGATAAATCTTCAAAGATTCCGGAACCTACCCACATACAACCATGA--------------AGAAATATCTCTCCAAACCATTATAGATCATGGTCTTGTGAATTCCATATATGCAACCCTCGATCAGATCCTTCAATCTGATTTAGGAAACGCTGTGAAAGATGTATGCAGGAGACTTGGACATGGAAGATACAGGATTATCTTCTCCTCAATACCACCAAAATTCACACCACCTGTTCGTCCAGCAATTCAT--TATATATATATCATGAAGGGACAATTTAA-------------------TTTTCAAGAAGACGGTCCTAG----CAAACTATTGGATGAAGAGGAAGAAATATATACAACAGTTGCTAATCATGAAAATTGGAGATTATTTTCTGAAGCTGCAGAAATTGAAGAAGCTATCACC--------ACAGATTATGAATATCAGCTGGTTTTCCAAAACAAGATCACAAGGATTTTTATCAGCAAATTCTACAACCAAAGTTATGAATACTTCAAGGGAGCAGGGCGCATAATTAAACCGGATTTTGGAAATGAA---TGCTCCAAGAAA---AGTTACTACAGAAGCCTGGCTC----AGTGGTTTCA-------GAAAACAGAGCCATCAGAGATTGACA-------CGGTGCAATCAGCACCAATGATAATCAACGAAGATAATGAATAAAGATCTTGTCATCCCCGACAAAGATCACTATTCAAGATAAGGAATCTACACTATTCCAGATA------------------------------------------AGTATGGATCTTGGTGGTCATGGGCAGCCAGATGAATAGAATTCTTTAAGCTAAATATGTTTTTCAATATATATTGATAATAGAATATCAATAATTTGGGCGTGGAAGAAGAATAAAAGAAATTCAGAAGATTACTC--------------AAGAAAGAATCCAAAAGGACACCCTATAAAGGATAAGGGAACAATATAAGGT-------------------------------------------------GCGGTGAATGACATATCACTGTGAAGAATAA-------------------------------------------------------------------------------------------------------------------------------------------------------------------------------------------------------------------------------------------------------------------------------------------------------------------------------------------------------------------------------------------------------------------------------------------------------------------------------------------------------------------------------------------------------------------------------------------------------------------------------------------------------------------------------------------------------------------------------------------------------------------------------------------
>chr12:22979220-22982951R
GATGGATCAATTAAATTGTGAACATGATTGGATTAGAGGAAAGGGTGACTATAATATCAAATGTGCTTTTTGCATATATTACCCTAGTCAAGAAAATAGAGTGACTTGTAGTATATGTCTAAAACAAGCTTGTGCTGAATGTATAAAAGCAAATAAACAAAAATGGAGAAAAGAAATAGAATTAGAATCAGATGAAAAGATTTTATCTAGTAGAGTACGAGTGTTAGAAAATAGACTAAATAAATTAGAAATAGAATTAGAGAACCTAAAAAATAATTGTGATATTAAAGCATTACCAGAAAATAAGGACATACAAAACACCGAATTTAAAGAGCAATTGATAACACTAAAAGACAGTAATACTGCTAAAATAATTCAACTAAGAGATGCCATAACTAATTTTGGAAATAAATATATAGTAAGATTGCCTTTCAAAGAAATATTAGGTATAAGAATCCCTGTTAAAGTAAAATTGACACCCAAAGTATCTTATAAAATATTAGCACTAGTAGACACTGGGTGTACAAAGAATATTATTCATGACAAATATTTCACAAGATGTCCTGAAATAGTTCACACAATTGACGACAATAAGGCAGAAGTTTCCACAGACATGTCCGGAATAAAGAAAATTCATAATCAGTTAGCTTATAATATGGAGGTTTACATTAATGCAACTAAATATATAATAGATGAGATTACAATAAGAGATTTGTCAATGATTAATGATGACATGATAATTGGCCTAAGGTTCCTTCAACAATCAGTACAAACCACAGTAATACATGAGCAAGGAATTACTTTTATCCCATATCAAAATAATGTTCCATATATCTCAGAGGTACGAAAGCGTGGTGGAATCTCCCC---------------CAAACTCGACAACTTAGAAGTACCTAATCTTGAGTCTGAAGAAAGAATTAATGAATATGAGCTTAGTGAGAATATAGACAACTATTCTTTCTCATCATATCTTCCAAAATCTATGGAATTGCCAGGTAAGACATCATGGGAAGATAGA------------------TATTTATTAAAAGCTACTAAAGATTTTGAATATATATGCA------------------------------------------------GGGAAATGGCTTCACAGAAGTCTGAATGGCTCACAAATATGAGTTC-ATGGAGACTGCCCCAACTGCCCAGAGGCCATGGAGAACGATTTAATCACAATTTCAGAATAACAGAGCTACAACAAGGGTTATTAAACCTCTTGTGGC-----------AAACAAAAAACAAAAAAGAAAAAGCTCATGCCTTAAATGGCCTGGCATATTATTTCAAAAA----------------------------TTTCGTGCCCTCAGATCAAAAGATAACAGAAAAAAGGGCTAAAATACAAGATATCCCTCATCATGAGGAAAGGTTACTAGATTATCGCGAGGAGAAATCCCG--------------------------------------------------------------------------------------------------------------------------------------------------------------------------------------------------TGATGGCCAAGATAAACTTCGCATGGAAGTTGAACAATCTATGGCAACA------GATAAGAATACCAAGGTATTCTCAGATAAGATTTTGATCTCAGCA---GATCCTGCTTCGAGCATGGTTGCTTTCCACATAAATATCAATAACCTATTGCAATCTTTTCCACATA--ATAAACCATCATCATCCACAAAAAGGCATGATACCATTCCCCAAACACCATACATACTGCATAATCATCCTAATTTATTCCTTCCACAATATATACTCCGGACCCAGCCAAAAGCACCATGTAGATCTTGTGCCTACAAAGATTCTTGCAAAAAGAAACTTAAAAGCCAAAATCCCATGAGTACTACATACGAAAAT------------------CTCCAACCCAGATTAAGCTTCAAAACGGAACAAACTTTATCCTGCTTTGGGCAAGACATCCTCGATCTTGTTTGGCAAAAGTTTAAGGAGAGACAAATGAAAATATTCCTTGGACTCCAAGATTA--------------------------------------------------------------------------------------------------------------------TTTCTTTGATCTCTTAGAAGGGAGAGAAAGAAACCCAGCCATACGAGTAATCATATATATGCTCCCTCTCTTAAGACTAGATGATCAGGCAATTTCTGACCCATCCTATAGA----------------------------------TTCCTGGTTCTCAAAGCTGAGATAAATCTTCAAAGATTCCGGAACCTACCCACATACAACCATGA--------------AGAAATATCTCTCCAAACCATTATAGATCATGGTCTTGTGAATTCCATATATGCAACCCTCGATCAGATCCTTCAATCTGATTTAGGAAACGCTGTGAAAGATGTATGCAGGAGACTTGGACATGGAAGATACATGATTATCTTCTCCTCAATACCACCAAAATTCACACCACCTGTTCGTCCAGCAATTCATTATATATATATATCATGAAGGGACAATTTAA-------------------TTTTCAAGAAGACGGTCCTAG----CAAACTATCGGATGAAGAGGAAGAAATATATACAACAGTTGCTAATCATGAAAATTGGAGATTATTTTCTGAAGCTGCAGAAATTGAAGAAGCTATCACC--------ACAGATTATGAATATCAGCTGGTTTTCCAAAACAAGATCACAAGGATTTTTATCAGCAAATTCTACAACCAAAGTTATGAATACTTCAAGGGAGCAGGGCGCATAATTAAACCGGATTTTGGAAATGAA---TGCTCCAAGAAA---AGTTACTACAGAAGCCTGGCTC----AGTGGTTTCA-------GAAAACAGAGCCATCAGAGATTGACA-------CGGTGCAATCAGCACCAATGATAATCAACGAAGATAATGAATAAAGATCTTGTCATCCCCGACAAAGATCACTATTCAAGATAAGGAATCTACACTATTCCAGATA------------------------------------------AGTATGGATCTTGGTGGTCATGGGCAGCCAGATGAATAGAATTCTTTAAGCTAAATATGTTTTTCAATATATATTGATAATAGAATATCAATAATTTGGGCGTGGAAGAAGAAAAAACGAATTTCAGAAGACTACTCAAGGAGGAATCCAGAAGAAGGAATCCAGAAGGACACCCTAT-AAGCATAAAGGAACAATATAGGGT-------------------------------------------------GCGGTGAATGACATATCCCTGTGAAGAATAAAACTTTCGGCAGGAAAGGCCTCAACTTTAGCCTGCTCTCGTGAATCCACAGTAGCGAAGAGATAAGCAGGAGGCACAGGCGACGCCACCCCTGACCTCTATAAAAGGAGGGGTTTGCCC---AGCTGAGAAAGAAGACACCATTCAGAGCAAAGCTTCCAAGCGCGCTCTCACCCTCCATTCCACCGTTCTTAGTAGTAGTGACTTTAGCCTACCTTGCATAGTATATTGAAGCAAGGAGGTGTGTTATAACGCTGTGTAAGGTAAGAACAGCTTGCTTGTACCTACCTTCGGGTTTCCCGAAAGGGAAAACCGTATGTAAGCTTATCTGTTTAATATGAAGTAATTTTCCTTAAGTATTCCTGCACGTTTGTTCTAGACAAGTGTTTATGCTAAGGACCCTATAGGAGAAACCTCTTCGGTTTGTTCTCGTTTTTAGCCTGCATCTTGCATAGGCGTCTGGAGAATCGGTATCCGTAGAGAAGTGTTCCCTTCGGGTGGAACTGCCTGGGGAGACGATAAACTCTTAGCTAGAACAAGTGTGACTTGGAATATCTTTTTAAGTTGCTTCTAAAAAGACAGATAGGTGAGGCATACGGTGAGTACCGAGTAGGACTTTACATCATCCGAAGCAAGCTTCTGAGGCTGTCTAAATAGGATTCGCCACCCTGCAAAGATCCTAAAGTTAAAATATCTCTCGAAGTGAACAGTACTGAACAGTAATTTGAACAGTAAACTGAATAGTAATCAGCCGAATAAACAGT
>chr10:9477496-9489483R
GATGGATCAATTAAATTGTGAACATGATTGGATTAGAGGAAAGGGTGACTATAATATCAAATGTGCTTTTTGCATATATTACCCAAGTCAAGAAAATAGAGTGACTTGTAGTATATGTCTAAAACAAGCTTGTGCTGAATGTATAAAAGTAAATAAACAAAAATGGAGAAAAGAAATAGAATTAGAATCAGATGAAAAGACTTTATCTAGTAGAGTACGAGTGTTAGAAAATAGACTAAATAAATTAGAAGTAGAATTAGAGAACCTAAAAAATAATTGTGATATTAAGGCATTACCAGAGAATTAGGACATACAAAACACCGAATTTAAAGAGCAATTGGTAACACTAAAAGACAGTAATACTGCTAAAATAATTCAACTAAGAGAGGCCATAACTAATTTTGGAAATAAATATATAGTAAGATTGCCTTTCAAAGAAATATTAGGTATAAGAATCCCTGTTAAAATAAAATTGACACCCAAAGTATCTTATAAAATATTAGCACTAGTAGACACCGGGTGTACAAAGAATATTATTTATGACAAATATTTCATAAGATGTCCTGAAATAGTTCACACAATTGACGACAATAAGGCAGAAGTTTCCACAGACATGTCCGGAATAAAGAAAATTCATAATCAGTTAGCTTATAATATTGAGGTTTACATTAATGCAACTAAATATATAATAGATGAGATTACAATAAGAGATTTGTCAATGATTAATGATGACATGATAATTGGCCTAAGGTTCCTTCAACAATCAGTACAAACCACAGTAATACATGAGCAAGGAATTACTTTTATCCCATATCAAAATAATGTTCCATACATCTCAAAGGTACGAAAGCGTGGTGGAACCTCCCC---------------CAAACTCGACAACTTAGAAGTACCTAATCTTGAGTCTGAAGAAAGAATTAATGAATATGAGCTTAGTGAGAATATAGACAACTATTATATATCAAATTCCAATATAGAGTGCATAGGACTACAAGCATTTGCACCAAATTGGTATAGGGATATTAAGTCTAAAAGGGATATAGAAAAAATTATTCAAAGATTAGAAGATATCCAAATTATAGGAGAAATTCCTATGAAATATTGGGAAAAAAATGCTATTGAGTGCAAAATTAATATAATAAACCCAGAGTATATTATTAAGACTAGCCCAATAGAAGCAACTTCGAAGACATAGAAG-AATTTAAGATGCATATAGAAGAACTGTTGAAACTAGGAGCCATAAGAGAAAGCAGAAGTCCACATAGGTCTGCAGCGTTCATAGTAAGAAATCATGTAGAAGAAGTTAGAGGTAAATCTAGGATGATCATAAACTATAAAAGACTAAATGATAATACTATAGAAGATGCCTATAATATCCCAAATAAGCAAGAATGGATTAATAGAATACAAGGTAGTAAATATTTCTCAAAATTTGACTTGAAAGCTGGATTCTGGCAAGTAAAGATGGCAGAAGAATCTATAGAATGGACTGCATTTACATGTCCTCAAGGACATTATGAATGGCTTGTTATGCCATTAGGATTAAAAAATGCACCAGCAATTTTCCAAAGGAAAATGCAGAATATATTTAACGAAAACCAAGAATTCATATTAGTCTACATAGATGACCTGTTAGTCTTCTCAAGGACTTACAAAGAACATATTGCTCATCTTGAAATATTTTTTAGAAAGGTGGAACAAAATAGGTTAATATTATCCAAAAAGAAAATGGAAATATGCAAAGAAAAAATTAACTTCCTTGGACATGAAATAGGAGAGGGCAAAATTCATTTGCAAGAACATATTGCTAAGAAAATTTTACAATTTCCTGATGCTATGAATGATAAAAAGAAATTACAGCAATTCTTAGGACTTGTAAATTATGCTAGAAATCACATCAATAATTTAGCAAAGTTAGCAGGACCGTTATATGCTAAATTAATAAAAAATGGTCAGAGATATTTTAATTCTGAAGACATTTAATTAGTAAGATTAATAAAAGAGAGGGTGAAAGAATTAAAACCTCTAGAATTACCATTAGAAGAAAGTTACTTTATCATTGAAACTGATGCATCACAACACGGTTGGGGTGCTATATTAAAGCAAAGACCTACTAAATT-TTCCGCTAAATCAGAAGAAAAAATATGTAGATATGCTTCTGGAAGTTATAAATTAAAAACTGTCAATAATACAGATAGAGAGATCATGGCAATAATCAATGCAATCAATGCCTTTAGGTTGTACTTAGGATTTAAAGAACTCACGGTTAGAACCGATTGTGAAGCCATTTGTAGGTACTATAATCAGCTAAATAGCAAGAAAAGCTCAACTAGAAGATGGGTTTTATTTGAAGATATTATAACAGGAAACGGCTATAAAGTTATATTTGAACATATTAAGGGGAAATATAATAATTTGGCTGACATGCTTTCTCGTTTACCTGAATTGCAGGTATGAAAAGATCAATGAATTACAGCGGAATTGAATGCTTCACATTTGGAGATGACAACAAGCTCAGAATATTCCCACCAAATTCATATAAATTTAAGCCAAAAGA-------CCATATAATCTTAGATGAAGTGCAAGAATGCATCTTGGATAATTTTTGGTACCAATACAATAATAAAAGGGAAGAAAAAGGATATATG-TTATCAATATTGAATAGCCTCTCTGAATATTTTCACTTAATAAACGGGTTATTAATGCCAGCTAATGAAGATCATGAAATAATCCAACAGAAGCCTATATATGTCGTATTTGATGGAAAGCTCCCAGGGGTCTATATATCTTTTGAAGAAATTGTGGCCCAAAAGATAGATGCTAAATTATTGGGAGGAATATCTTGGAAGAAATATAAAGACATTGATGAAGCACTAAGCCAGGCTAGAAAAATAGTAGGAATAAATTATTATCTAGAGCCTGCTGCAAAAGAATATATTCAAAAATGCAAAAAAGCTAAAGGAAAGAAGACTCTAGAAATAC--------CCATTAAAACGACTATAAAAGAAGAAGGGTATTCTAAAAAACCCACATACAAGGAATGCCTAACAAAAGGAGTGGATCCATTAGATGGGGAATATATTGATTGGAAAATAATAGAAAAATTTGAAGAAGCCTCCCCATAATTAAAGAAGGAATTAAAGGAAGAAATACTTAAAGAATTAAAACAAGAAAT--------GGATCAGAAATTTGAACAAATAAAAAAGGCAGTAGATGAGAAATTAGAAGTTTCTTTTTCTGATCTGGACACTATGGATCTTGGTGGTCATGGGCAACCAGATGAATAGAATTCTTTAAGCTAAATATGTTTTTCAATATATATTGATAATAGAATATCAACAATTTGGGCGTGGAAGAAGAATAAACGAATTTCAGAAGACTACTCAAGAAGGAATCCAGAAGAAGGAATCCAGAAGGACACCCTATAAAGCATAAAGGAACAATATAGGGTGCGGTGAATGACATATCCCTGTGAAGAATATAATTTTCGGCAACTTTCGGCGGTGAATGACATATCCCTGTGAAGAATAAAACTTTCGGTAGGAAAGGCCTCAACTTTAGCCTGCTCTCGTGACTCCACAGTAGCGAAGAGATAAGCAGGAGGCACAGGCGACGCCACCCCTGACCTGTATAAAAGGAGGGGCCTGCCC---AGCTGAGGGGAGAGACAGCATTCAGAGCAAAGCTTCCAAGCGCGCTCTCACCCTCCATTCCACCGTTCTTAGTAGTAGTGACTTTAGCCTACCTTGCGTAGTATATTGAAGCAAGGAGTTGTATTATAACGCTGTGTAAGGTAAGAACAACTTGCTTGTACCTACCTTCGGGTTTCCAGAAAGGGAAAACCGTATGTAAGCTTATCTGTTTAATATGAAGTAATTTTCCTTAAGTATTCCTGCACGTTTGTTCTAGAGAAGTGTTTATGCTAAGGACCCTATAGGAGAAACCTCTTCGGTTTGTTCTCGTTTTTAGCCTGCATCTTGCATAGGCGTCTGGAGAATCGGTATCCGTAGAGAAGTGTTCCCTTCGGGTGGAACCGCCT-GGGAGACGATAAACTCTTAGCTAGAACAAGTGTGACTTGGAATATCTTTTTAAGTTGCTTCTAAAAAGACAGATAGGTGAGGCATACGGTGAGTACCGAGTAGGACTTTACATCATCTGAAACAAGCTTCTGAGGCTGTCTAAGTAGGATTCGCCACCCTGCAAAGATCCTAAAGTTAAAATATCTCTCGAAGTGAACAGTATTGAACAGTAATTTGAACAGTAAACTGAATAGTAATCTGCCGAATAAATAGT
>chr05:19005728-19006690R
------------------------------------------------------------------------------------------------------------------------------------------------------------------------------------------------------------------------------------------------------------------------------------------------------------------------------------------------------------------------------------------------------------------------------------------------------------------------------------------------------------------------------------------------------------------------------------------------------------------------------------------------------------------------------------------------------------------------------------------------------------------------------------------------------------------------------------------------------------------------------------------------------------------------------------------------------------------------------------------------------------------------------------------------------------------------------------------------------------------------------------------------------------------------------------------------------------------------------------------------------------------------------------------------------------------------------------------------------------------------------------------------------------------------------------------------------------------------------------------------------------------------------------------------------------------------------------------------------------------------------------------------------------------------------------------------------------------------------------------------------------------------------------------------------------------------------------------------------------------------------------------------------------------------------------------------------------------------------------------------------------------------------------------------------------------------------------------------------------------------------------------------------------------------------------------------------------------------------------------------------------------------------------------------------------------------------------------------------------------------------------------------------------------------------------------------------------------------------------------------------------------------------------------------------------------------------------------------------------------------------------------------------------------------------------------------------------------------------------------------------------------------------------------------------------------------------------------------------------------------------------------------------------------------------------------------------------------------------------------------------------------------------------------------------------------------------------------------------------------------------------------------------------------------------------------------------------------------------------------------------------------------------------------------------------------------------------------------------------------------------------------------------------------------------------------------------------------------------------------------------------------------------------------AGAAGA---------------TCCAGAAGAAGGAACCCAGAAGGACACCCTATAAAGCATAAAGGAACAATATAGGGT-------------------------------------------------GCGGTGAATGACATATCCCTGTGAAGAATAAAACTTTCGGCAGGAAAGGCCTCAACTTTAGCCTGCTCTCGTGAATCCACAGTAGCGAAGAGATAAGCAGGAGGCACAGGCGACGCCACCCCTGACCTCTATAAAAGGAGGGGCCTGCCC---AGCTGAGGAGGAAGACACCATTCAGAGCAAAGCTTCCAAGCGCGCTCTCACCCTCCATTCCACCGTTCTTAGTAGTAGTGACTTTAGCCTACCTTGCATAGTGTATTGAAGCAAGGAGTTGTGTTATAACGCTGTGTAAGGTAAGAACAGCTTGCTTGTACCTACCTTCGGGTTTCCCAAAAGGGAAAACCGTATGTAAGCTTATCTATTTAATATGAAGTAATTTTCCTTAAGTATTCCTGCACGTTAGTTCTAGACAAGTGTTTATGCTAAGGACCCTATAGGAGAAACCTCTTCGGTTTGTTCTCGTTTTTAGCCTGCATCTTGCATAGGCGTCTGGAGAATCGGTATCCGTAGAGAAGTGTTCCCTTCGGTTGGAACTGCCTGGGGAGACGATAAACTCTTAGCTAGAACAAGTGTGACTTGGAATATCTTTTTAAGTTGCTTCTAAAAAGACAGATAGGTGAGGCATACGGTGAGTACCGAGTAGGACTTTACATCATCTGAAACAAGCTTCTGAGGCTGTCTAAGTAGGATTCGCCACCCTGCAAAGATCCTAAAGTTAAAATATCTCTCGAAGTGAACAATATTGAACAGTAATTTGAACAGTAAACTGAATAGTAATCAGCCGAATAAACAGT
>chr08:21255332-21262779R
GATGGATCAATTAAATTGTGAACATGATTGGATTAGAGGAAAGGGTGACTATAATATCAAATGTGCTTTTTGCATATATTACCCAAGTCAAGAAAATAGAGTGACTTGTAGTATATGTCTAAAACAAGCTTGTGCTGAATGTATAAAAGCAAATAAACAAAAATAGAGAAAAGAAATAGAATTAGAATCAGATGAAAAGACTTTATCTAGTAGAGTACGAGTGTTAAAAAATAGACTAAATAAACTAGAAGTAGAATTAGAGAACCTAAAAAATAATTGTGATATTAAGGCATTACCAGAGAACAAGGACATACAAAACACCGAATTTAAAGAGCAATTGATAACACTAAAAGACAGTAATACTGCTAAAATAATTCAACTAAGAGAGGCCATAACTAATTTTGGAAATAAATATATAGTAAGATTGCCTTTCAAAGAAATATTAGGTATAAGAATCCCTGTTAAAATAAAATTGACACCCAAAGTATCTTATAAAATATTAGCACTAGTAGACACCGGGTGTACAAAGAATATTATTCATGACAAATATTTCATAAGATGTCCTGAAATAGTTCACACAATTGACGACAATAAGGCAGAAGTTTCCACAGACATGTCCGGAATAAAGAAAATTCATAATCAGTTAGCTTATAATATTGAGGTTTACATTAATTCAACTAAATATATAATAGATGAGATTACAATAAGAGATTTGTCAATGATTAATGATGACATGATAATTGGCCTAAGGTTCCTTCAACAATCAGTACAAACCACAGTAATACATGAGCAAGGAATTACTTTTATCCCATATCAAAATAATGTTCCATATATCTCAGAGGTACGAAAGCGTGGTGGAACCTCCCC---------------CAAACTCGACAACTTAGAAGTACCTAATCTTGAGTCTGAAGAAAGAATTAATGAATATGAGCTTAGTGAGAATATAGACAACTATTATATATCAAATTCCAATATAGAGTGCATAGGACTACAAGCATTTGCACCAAATTGGTATAGGGATATTAAGTCTAAAAGGGATATAGAAAAAATTATTCAAAGATTAGAAGATATCCAAATTATAGGAGAAATTCCTATGAAATATTGG-AAAAAAATGCTATTGAGTGCAAAATTAATATAATAAACCCAGAATATATTATTAAGACTAGCCCAATAGAAGCAACTCCGAAAGACATAGAAGAATTTAAGATGCATATAGAAGAACTGTTGAAACTAGGAGCCATAAGAGAAAGCAGAAGTCCACATAGGTCTGCAGCGTTCATAGTAAGAAATCATGCAGAAGAAGTTAGAGGTAAATCTAGGATGGTCATAAATTATAAAAGACTAAATGATAATACTATAGAAGATGCCTATAATATCCCAAATAAGCAAGAATGGATTAATAGAATACAAGGTAGTAAATATTTCTCAAAATTTGACTTGAAAGTTGGATTCTGGCAAGTAAAGATGGCAGAAGAATCTATAGAATGGACTGCATTTACATGTCCTCAAGGACATTATGAATGGCTTGTTATGCCATTAGGATTAAAAAATGCACCAGCAATTTTCCAAAGGAAAATGCAGAATATATTTAACGAAAACCAAGAATTCATATTAGTCTACATAGATGACCTGTTAGTCTTCTCAAGGACTTACAAAGAACATATTGCTCATCTTGAAATATTTTTTAGAAAGGTGGAACAAAATGGGTTAATATTATCCAAAAAGAAAATGGAAATATGCAAAGAAAAAATTAACTTCCTTGGACATGAAATAGGAGAGGGCAAAATTCATTTGCAAGAACATATTGCTAAGAAAATTTTACAATTTCTTTATGCTATGAATGATAAAAAGAAATTACAACAATTCTTAGGACTTGTAAATTATGCTAGAAATCACATCAATAATTTAGCAAAGTTAGCAGGACCGTTATATGCTAAATTAAGAAAAAATGGTCAGAGATATTTTAATTCTGAAGACATTAAATTAGTAAGATTAATAAAAGAGAGGGTGAAAGAATTAAAACCTCTAGAATTACCATTAGAAGAAAGTTACTTTATCATTGAAACTGATGCATTACAACACGGTTGGGGTGCTATATTAAAGCAAAGACCTACTAAATT-TTCCGCTAAATTAGAAGAAAAAATATGTAGATATGCTTCTGGAAGTTATAAATTAAAAACTGTCAATAATACAGATAGAGAGATCATGGCAATAATCAATGCAATCAATGCCCTTAGGTTGTACTTAGGATTTAAAGAATTCACGGTTAGAACCGATTGTGAAGCCATTTGTAGGTGCTATAATCAGCTAAATAGCAAGAAAAGCTCAACTAGAAGATGGGTTTTATTTGAAGATATTATAACAGGAAACGGCTATAAAGTTATATTTGAACATATTAAGGGGAAAGATAATAATTTGCCTGACATGCTTTCTCGTTTACCTGAATTGCAGGTATGAAAAGATCAATGAATTACAGCGGAATTGAATGCTTCATATTTGGAGATGACAACAAGCTCAGAATATTCCCACCAAATTCATATAAATTTAAGCCAAAAGA-------CCATATAATCTTAGATGAAGTGCAAGAATGCATCTTGGATAATTTTTGGTACCAATACAATAATAAAAGGGAAGAAAAAGGATATATG-TTATCAATATTGAATAGCCTCTCTGAATATTTTCACTTAATAAACGGGTTATTAATGCCAGCTAATAAAGATCATGAAATAATCCAACAGAAGCCTATATATGTCGTATTTGATGGAAAGCTCCCAGGGGTCTATATATCTTTTGAAGAAATTGTGGCCCAAAAGATAGATGCTAAATTAATGGGAGGAATATCTTGGAAGAAATATAAAGACATTGATGAAGCACTAAGCCAGGCTAGAAAAATACTAGGAATAAATTATTATCTAGAGCCTACTACAAAAGAATATATTCAAAAATACAAAAAAGCTAAAGGAAAGAAGACTCCAGAAATAC--------CCATTAAAACGACTATAAAAGAAGAAGGGTATTCTAAAAAACCCACATACAAGGAATGCCTAACAAAAGGAGTGGATCCATTAGATGGGGAATATATTGATTGGAAAATAATAGAAAAATTTGAAGAAGCCTCCCCACAATTAAAGAACGAATTAAAGGAAGAAATACTTAAAGAATTAAAACAAGAAAT--------GGATCAGAAATTTGAACAAATAAAAAAGGCAGTAGATGAGAAATTAGAAGTTTCTTTTTCTGATCTGGACACTATGGATCTTGGTGGTCATGGGCAACCAGATGAATAGAATTCTTTAAGCTAAATATGTTTTTCAATATATATTGATAATAGAATATCAACAATTTGGGCGTGGAAGAAGAATAAACGAATTTCAGAAGACTACTCAAGAAGGAATCCAGAAGAAGGAATCCAGAAGGACACCCTATAAAGCATAAAGGAACAATATAGGGTGCGGTGAATGACATATCCCTGTGAAGATTATAATTTTCGGCAACTTTCGGCAGTGAATGACATATCCCTGTGAAGAATAAAACTTTCGGCAGGAAAGGCCTCAACTTTAGCCTGCTCTCGTGAATCCACAGTAGCGAAGAGATAAGCAGGAGGCACAGGCGACGCCACCCCTCACCTTTATAAAAGGAGGGGCCTGCCC---AGCTGAGGAGAAAGACACCATTCAGAGCAAAGCTTCCAAGCGCGCTCTCACCCTCCATTCCACCGTTCTTAGTAGTAGTGACTTTAGCCTACCTTGCATAGTATATTGAAGCAAGAAGTTGTGTTATAACGCTGTGTAAGGTAAGAACAGCTTGCTTGTACCTACCTTCGGATTTCCCGAAAGGGAAAACCGTAAGTAAGCTTATCTGTTTAATATGAAGTAATTTTCCTTAAGTATTCCTGCACGTTTGTTATAGACAAGTGTTTATGCTAAGGACCCTATAGGAGAAACATCTTCGGTTTGTTCTCGTTTTTAGCCTGCATCTTGCATAGGCGTCTGGAGAATCGGTATCCGTAGAGAAGTGTTCCCTTCGGGTGGAACTGCCTAGGGAGACGATAAACTCTTAGCTAGAACAAGTGTGACTTGAAATATCTTTTTAAGTTGCTTCTAAAAAGACAGATAGGTGAGGCATACGGTGAGTACCGAGTAGGACTTTACATCATCTGAAACAAGCTTCTGAGGCTGTCTAAGTAGGATTCGCCACCCTGCAAAGATCCTAAAGTTAAAATATCTCTCGAAGTGAACAGTATTGAACAGTAA------------ACTGAATAGTAATCAGCCGAATAAACAGT
>chr05:18225167-18226558R
-----------------------------------------------------------------------------------------------------------------------------------------------------------------------------------------------------------------------------------------------------------------------------------------------------------------------------------------------------------------------------------------------------------------------------------------------------------------------------------------------------------------------------------------------------------------------------------------------------------------------------------------------------------------------------------------------------------------------------------------------------------------------------------------------------------------------------------------------------------------------------------------------------------------------------------------------------------------------------------------------------------------------------------------------------------------------------------------------------------------------------------------------------------------------------------------------------------------------------------------------------------------------------------------------------------------------------------------------------------------------------------------------------------------------------------------------------------------------------------------------------------------------------------------------------------------------------------------------------------------------------------------------------------------------------------------------------------------------------------------------------------------------------------------------------------------------------------------------------------------------------------------------------------------------------------------------------------------------------------------------------------------------------------------------------------------------------------------------------------------------------------------------------------------------------------------------------------------------------------------------------------------------------------------------------------------------------------------------------------------------------------------------------------------------------------------------------------------------------------------------------------------------------------------------------------------------------------------------------------------------------------------------------------------------------------------------------------------------------------------------------------------------------------------------------------------------------------------------------------------------------------------------------------------------------------------------------------------------------------------------------------------------------------------------------------------------------------------------------------------AGAATTAC--------CCATTAAAACGACTATAAAAGAAGAAGGGTATTCTAAAAAACCCACATACAAGGAATGCCTAACAAAAGGAGTGGATCCATTAGATGGGGAATATATTGATTGGAAAATAATAGAAAAATTTGTAGAAGCCTCCCCACAATTAAAGAAGGAATTAAAGGAAGAAATACTTAAAGAATTAAAACAAGAAAT--------GGATCAGAAATTTGAACAAATAAAAAAGGCAGTAAATGAGAAATTAGAAGTTTCTTTTTCTGATCTGGACACTATGGATCTTGGTGGTCATGGGCAACCAGATGAATAGAATTCTTTAAGCTAAATATGTTTTTCAATATATATTGATAATAGAATATCAACAATTTGGGCGTGGAAGAAGAATAAACGAATTTCAGAAGACTACTCAAGAAGGAATCCAGAAGAAGGAATCCAGAAGGACACCCTATAAAGCATAAAGGAACAATATAGGGTGCGGTGAATGACATATCCCTGTGAAGAATATAATTTTCAGCAACTTTCGGCGGTGAATGACATATCCCTGTGAAGAATAAAACTTTAGGCAGGAAAGGCATCAACTTTAGCCTGCTCTCGTGAATCCACAGTAGCGAAGAGATAAGCAGGAGGCACAAGCGACGCCACCCCTGACCTCTATAAAAGGAGGGGCCTGCCC---AGCTGAGGGAGAAGACACCATTCAGAGCAAAGCTTCCAAGCGCACTCTCACCCTCCATTCCACCGTTTTTAGTAGTAGTGACTTTAGCCTACCTTGCATAGTATATTGAAGCAAGGAGTTCTGTTATAACGCTGTGTGAGGTAAGAACAGCTTGCTTGTACCTACCTTCGGGTTTCCCGAAAGGGAAAACCGTATGTAAGCTTATCTGTTTAATATGAAGTAATTTTCCTTAAGTATTCCTGCACGTTTGTTCTAGACAAGTGTTTATGCTAAGGACCCTATAGAAGAAACCTCTTCGGTTTGTTCTCGTTTTTAGCCTGCATCTTGCATAGGCGTTTGGAGAATCGGTATCCGTAGAGAAGTGTTCCCTTCGGGTGGAACTGCTTAGGGAGACGATAAACTCTTAGCTAGAACAAGTGTGATTTGGAATATCTTTTTAAGTTGCTTTTAAAAAGACAGATAGGTGAGGCATACGGTGAGTACCGAGTAGGACTTTACATCATCTGAAACAAGCTTCTGAGGCTGTCTAAGTAGGATTCGCCACCCTGCAAAGATCCTAAAGTTAAAATATCTCTCGAAGTGAACAGTATTGAACAATAATTTGAACAGTAAACTGAATAGTAATCAGCCGAATAAAAA--
>chr06:1713979-1714980R
------------------------------------------------------------------------------------------------------------------------------------------------------------------------------------------------------------------------------------------------------------------------------------------------------------------------------------------------------------------------------------------------------------------------------------------------------------------------------------------------------------------------------------------------------------------------------------------------------------------------------------------------------------------------------------------------------------------------------------------------------------------------------------------------------------------------------------------------------------------------------------------------------------------------------------------------------------------------------------------------------------------------------------------------------------------------------------------------------------------------------------------------------------------------------------------------------------------------------------------------------------------------------------------------------------------------------------------------------------------------------------------------------------------------------------------------------------------------------------------------------------------------------------------------------------------------------------------------------------------------------------------------------------------------------------------------------------------------------------------------------------------------------------------------------------------------------------------------------------------------------------------------------------------------------------------------------------------------------------------------------------------------------------------------------------------------------------------------------------------------------------------------------------------------------------------------------------------------------------------------------------------------------------------------------------------------------------------------------------------------------------------------------------------------------------------------------------------------------------------------------------------------------------------------------------------------------------------------------------------------------------------------------------------------------------------------------------------------------------------------------------------------------------------------------------------------------------------------------------------------------------------------------------------------------------------------------------------------------------------------------------------------------------------------------------------------------------------------------------------------------------------------------------------------------------------------------------------------------------------------------------------------------------------------------------------------------------------------------------------------------------------------------------------------------------------------------------------------------------------------------------------------------------AATTTCAGAAGACTACTCAAGAAGGAATCCAGAAGAAGGAATCCAGAAGGACACCCTATAAAGCATAAAGGAACAATATAGGGTGCGGTGAATGACATATCCCTGTGAAGAATATAATTTTCGGCAACTTTCGGCGGTGAATGACATATCCCTGTGAAGAATAAAACTTTCGGCAGGAAAGGCCTCAACTTTAGCCTGCTCTCGTGAATCCACAGTAGCGAAGAGATAAGCAGGAGGCACAGGCGACGCCACCCCTGACCTCTATAAAAGGAGGGGCCTGCCC---AGCTGAGGAGGAAGACACCATTCAGAGCAAAGCTTCAAAGCGCGCTCTCACCCTCCATTCCACCGTTCTTAGTAGTGGTGACTTTAGCCTACCTTGCATAGTATATTGAAGCAAGGAGTTGTGTTATAACGCTGTGTAAGGTAAGAACAGCTTGCTTGTACCTACCTTCGGGTTTCCCGAAAGGGAAAACCATATGTAAGCTTATCTGTTTAATATGAAGTAATTTTCCTTAAGTATTCCTGCACGTTTGTTCTAGACAAATGTTTATGCTAAGGACCCTATAGGAGAAACCTCTACGGTTTGTTCTCGTTTTTAGCCTGCATCTTGCATAGGCGCCTAGAGAATCGGTATCCGTAGAGAAGTGTTCCCTTCGGGTGGAACTGCCTGGGGAGACGATAAACTCTTAGCTAGAACAAGTGTGACTTGGAATATCTTTTTAAGTTGCTTCTAAAAAGACAGATAGGTGAGGCATACGGTGAGTACCGAGTAGGACTTTACATCATCTGAAACAAGCTTCTGAGGCTGTCTAAGTAGGATTCGCCACCCTGCAAAGATCCTAAAGTTAAAATATCTCTCGAAGTGAACAGTATTGAACAGTAATTTGAACAGTAAACTGAATAGTAATCAGCCGAACAAACAGT
>chr12:25148867-25152671R
-----------------------------------------------------------------------------------------------------------------------------------------------------------------------------------------------------------------------------------------------------------------------------------------------------------------------------------------------------------------------------------------------------------------------------------------------------------------------------------------TGACACCCAAAGCATCTTATAAAATATTAGCACTAGTAGACACCGGGTGTACAAAGAATATTATTCATGACAAATATTTCATAAGATGTCCTGAAATAGTTCACACAATTCATGACAATAAGGCAGAAGTTTCCACAGACATGTCCGGAATAAAGAAAATTCATAATCAGTTAGCTTATAATATTGAGGTTTACATTAATGCAACTAAATATATAATAGATGAGATTACAATAAGAGATTTGTCAATGATTAATGATGACATGATAATTGGCCTAAGGTTCCTTCAACAATCAGTACAAACCACAGTAATACATTAGCAAGGAATTACTTTTATCCCATATCAAAATAATGTTCCATATATCTCAGAGGTACGAAAGCGTGGTGGAACCTCCCC---------------CAAACTCGACAACTTAGAAGTACCTAATCTTGAGTCTGAAGAAAGAATTAATGAATATGAGCTTAGTGAGAATATAGACAACTATTATATATCAAATTCTAATATAGAGTGCATAGGATTACAAGCATTTGCACCAAATTGGTATAGGGATATTAAGTCTAAAAGGGATATAGAAAAAATTATTCAAAGATTAGAAGATATCCAAATTATAGGAGAAATTCCTATGAAATATTGGAAAAAAAATGCTATTGAGTGCAAAATTAATATAATAAACCCAGAGTATATTATTAAGACTAGCCCAATAGAAGCAACTCCGAAAGACATAGAAGAATTTAAGATGCATATAGAAGAACTGTTGAAACTAGGAGCCATAAGAGAAAGCAGAAGTCCACATAGGTCTGCAGCGTTCATAGTAAGAAATCATGCAGAAGAAGTTAGAGGTAAATCTAGGATGGTCATAAATTATAAAAGACTAAATGATAATACTATAGAAGATGCCTATAATATCCCAAATAAGCAAGAATGGATTAATAGAATACAAGGTAGTAAATATTTCTCAAAATTTGACTTGAAAGCTGGATTCTGGTAAGTAAAGATGACAGAAGAATCTATAGAATGGACTGCATTTACATGTCCTCAAGGACATTATGAATGGCTTGTTATGCCATTAGGATTAAAAAATGCACCAGCAATTTTCCAAAGGAAAATGCAGAATATATTTAACGAAAACCAAGAATTCATATTAGTCTACATAGATGACCTGTTAGTCTTCTCAAGGACTTACAAAGAACATATTGCTCATCTTGAAATATTTTTTAGAAAGGTGGAACAAAATGGGTTAATATTATCCAAAAAGAAAATGGAAATATGCAAAGAAAAAATTAACTTCCTTGGACATGAAATAGGAGAGGGCAAAATTCATTTGCAAGAACATATTGCTAAGAAAATTTTACAATTTCCTGATGCTATGAATGATAAAAAGAAATTACAACAATTCTTAGGACTTGTAAATTATGCTAGAAATCACATCAATAATTTAGCAAAGTTAGGAGGACCGTTATATGCTAAATTAAGAAAAAATGGTCAGAGATATTTTAATTCTGAAGACATTAAATTAGTAAGATTAATAAAAGAGAGGGTGAAAGAATTAAAATCTCTAGAATTACCATTAGAAGAAAGTTACTTTATCATTGAAACTGATGCATCATAACACGGTTGGGGTGCTATATTAAAGCAAAGACCTACTAAATT-TTCCGCTAAATCAGAAGAAAAAATATGTAGATATGCTTCTGGAAGTTATAAATTAAAAACTGTCAATAATACAGATAGAGAGATCATGGCAATAATCAATGCAATCAATGCCTTTAGGTTGTACTTAGGATTTAAAGAATTCACGGTTAGAATCGATTGTGAAGCCATTTGTAGGTACTATAATCAGCTAAATAGCAAGAAAAGCTCAACTAGAAGATGGGTTTTATTTGAAGATATTATAACAGGAAACGGCTATAAAGTTATATTTGAACATATTAAGGGGAAAGATAATAATTTGCCTGACATGCTTTCTCGTTTATCTGAATTACAGGTATGAAAAGATCAATGAATTACAGCGGAATTGAATGCTTCACATTTGGAGATGACAACAAGCTCAGAATATTCCCACCAAATTCATATAAATTTAAGCCAAAAGA-------CCATATAATCTTAGATGAAGTGCAAGAATGCATCTTGGATAATTTTTGGTACCAATACAATAATAAAAGGGAAGAAAAAGGATATATG-TTATCAATATTGAATAGCCTCTCTGAATATTTTCACTTAATAAACGGGTTATTAATGCCAGCTAATGAAGATCATGAAATAATCCAACAGAAGCCTATATATGTCGTATTTGATGGAAAGCTCCCAGGGGTCTATGTATCTTTTGAAGAAATTGTGGCCCAAAAGATAGATGCTAAATTAATAGGAGGAATATCTTGGAAGAAATATAAAGACATCGATGAAGCACTAAGCCAGGCTAGAAAAATACTAGGAATAAATTATTATCTAGAGCTTGCTGCAAAAGAATATATTCAAAAATGCAAAAAAGCTAAAGGAAAGAAGACTCCAGAAATAC--------CCATTAAAACGACTATAAAAGAAGAAGGGTATTCTAAAAAACCCACATACAAGGAATGCCTAACAAAAGGAGTGGATCCATTAGATGGGGAATATATTCATTGGAAAATAATAGAAAAATTTGAAGAAGCCTCCCCACAATTAAAGAAGGAATTAAAGGAAGAAATACTTAAAGAATTAAAACAAGAAAT--------GGATCAGAAATTTGAACAAATGAAAAAGGCAGTAGATGAGAAATTAGAAGTTTCTTTTTCTGATCTGGACACTATGGATCTTGGTGGTCATGGGCAACCAGATGAATAGAATTCTTTAAGCTAAATATGTTTTTCAATATATATTGATAATAGAATATCAACAATTTGGACGTAGAAGAAGAATAAACGAATTTCAGAAGACTACTC--------------AAGAAAGAATCCAGAAGGACACCCTATAAAGCATAAAGGAACAATATAGGGTGCGGTGAATGACATATCCCTGTGAAGAATATAATTTTCGGCAACTTTC-GCGGTGAATGACATATCCCTGTGAAGAATAAAACTTTCGGCAGGAAAGGCCTCAACTTTAGCCTGCTCTCGTGAATCCACAGTAGCGAAGAGATAAGCAGGAGGCACATGCGACGCCACCCCTGATCTCTATAAAAGGAGGGGCCTGCCC---AGCTGAGAACGAGGACACCATTCAGAGCAAAGCTTCCAAGCGCGCTCTCACCCTCCATTCCACCGTTCTTAGTAGTAGTGACTTTAGCCTACCTTGCATAGTATATTGAAGCAAGGAGTTGTATTATAACGCTGTGTAAGGTAAGAACAGCTTGCTTGTACCTACCTTCGGGTTTCCCGAAAGGGAAAACCGTATGTAAGCTTATCTGTTTAATATGAAGTAATTTTCCTTAAGTATTCCTGCACGTTTGTTCTAGACAAGTGTTTATGCTAAGGACCCTATAGGAGAAACCTCTTCGGTTTGTTCTCGTTTTTAGCCTGCATCTTGCATAGGCGTCTGGAGAATCGGTATCCATAGAGAAGTGTTCCCTTCGGGTGGAACTGCCTGGGGAGACGATAAACTCTTAGCTAGAACAAGTGTGACTTGGAATATCTTTTTAAGTTGCTTCTAAAAAGACAGATAGGTAAGGCATACGGTGAATACCGAGTAGGACTTTACATCATCTGAAACAAACTTCTGAGGCTGTCTAAGTAGGATTCGCCACCCTGCAAAGATCCTAAAGTTAAAATATCTCTCGAAGTGAACAGTATTGAACAGTAATTTGAACAGTAAACTGAATAGTAATCAGCCGAATAAATAGT
>chr12:26542429-26545864R
------------------------------------------------------------------------------------------------------------------------------------------------------------------------------------------------------------------------------------------------------------------------------------------------------------------------------------------------------------------------------------------------------------------------------------------------------------------------------------------------------------------------------------------------------------------------------------------------------------------------------------------------------------------------------------------------------------------------------------------------------------------------------------------------------------------------------------------------------------------------------------------------------------------------------CTTAGAAGTACCTAATCTTGAGTCTGAAGAAAGAATTAATGAATATGAGCTTAGTGAGAATATAGACAACTATTATATATCAAATTCCAATATAGAGTGCATAGGACTACAAGCATTTGCACCAAATTGGTATAGGGATATTAAGTCTAAAAGGGATATAGAAAAAATTATTCAAAGATTAGAAGATATCCAAATTATAGGAGAAATTCCTATGAAATATTGGGAAAAAAATGCTATTGAGTGCAAAATTAATATAATAAACCCAGAGTATATTATTAAGACTAGCCCAATAGAAGCAACTCCGAAAGACATAAAAGAATTTAAGATGCATATAGAAGAACTGTTGAAACTAGGAGCCATAAGAGAAAGCAGAAGTCCACATAGGTCTGCAGCGTTCATAGTAAGAAATCATGCAGAAGAAGTTAGAGGTAAATCTAGGATGGTCATAAATTATAAAAGACTAAATGATAATACTATAGAAGATGCCTATAATATCCCAAATAAGCAAGAATGGATTAATAGAATACAAGGTAGTAAATATTTCTCAAAATTTGACTTGAAAGCTGGATTCTGGCAAGTAAAGATGGCAGAAGAATCTATAGAATGGACTGCATTTACATGTCCTCAAGGACATTATGAATGGCTTGTTATGCCATTAGGATTAAAAAATGCACCAGCAATTTTCCAAAGGAAAATGCAGAATATATTTAACGAAAACCAAGAATTCATATTAGTCTACATAGATGACCTGTTAGTCTTCTCAAGGACTTACAAAGAACATATTGCTCATCTTGAAATATTCTTTAGAAAGGTGGAACAAAATGGGTTAATATTATCCAAAAAGAAAATGGAAATATGCAAAGAAAAAATTAACTTCCTTGGACATGAAATAGGAGAGGGCAAAATTCATTTGCAAGAACATATTGCTAAGAAAATTTTACAATTTCCTGATGCTATGAATGATAAAAAGAAATTACAGCAATTCTTAGGACTTGTAAATTATGCCAGAAATTACATCAATAATTTAGCAAAGTTAGCAGGACCGTTATATGCTAAATTAAGAAAAAATAGTCAGAGATATTTTAATTCTGAAGACATTAAATTAGTAAGACTAATAAAAGAGAAGGTGAAAGAATTAAAACCTCTAGAATTACCATTAGAAGAAAGTTACTTTATCATTGAAACTGATGCATCACAATACGGTTGGGGTGCTATATTAAAGCAAAGACCTACTAAATT-TTCCGCTAAATCAGAAGAAAAAATATGTAGATATGCTTCTGGAAGTTATAAATTAAAAACTGTCAATAATACAGATAGAGAGATCATGGCAATAATCAATGCAATCAATGCCTTTAGGTTGTACTTAGGATTTAAAGAATTCACGGTTAGAACCGATTGTGAAGCCATTTGTAGGTACTATAATCAGCTAAATAGCAAGAAAAGCTCAACTAGAAGATGGGTTTTATTTGAAGATATTATAACAGGAAACGGTTATAAAGTTATATTTGAACATATTAAGGGGAAAGATAATAATTTGCCTGACATGCTTTCTCGTTTACCTGAATTGCAGGTATGAAAAGATCAATGAATTACAGCGGAATTGAATGCTTCACATTTGGAGATGACAACAAGCTCAGAATATTCCCACCAAATTCATATAAATTTAAGCCAAAAGA-------CCATATAATCTTAGATGAAGTGAAAGAATGCATCTTGGATAATTTTTGGTACCAATACAATAATAAAAGGGAAGAAAAAGGATATATG-TTATCAATATTGAATAGCCTCTCTGAATATTTTCACTTAATAAACGGGTTATTAATGCCAGCTAATGAAGATCATGAAATAATCCAACAGAAGCCTATATATGTCGTATTTGATGGAAAGCTCCCAGGGGTCTATATATCTTTTGAAGAAATTGTGGCCCAAAAGATAGATGCTAAATTAATGGGAGGAATATCTTGGAAGAAATATAAAGACATTGATGAAGCATTAAGCCAGGCTAGAAAAATACTAGGAATAAATTATTATCTAGAGCCTGCTGCAAAAGAATATATTCAAAAATGCAAAAAAGCTAAAGGAAAGAAGACTCCAGAAATAC--------CCATTAAAACGACTATAAAAGAAGAAGGGTATTCTAAAAAACCCACATACAAGGAATGCCTAACAAAAGGAGTGGATCCATTAGATGGGGAATATATTGATTGGAAAATAATAGAAAAATTTGAAGAAGCCTCCCCACAATTAAAGAAGGAATTAAAGGAGGAAATACTTAAAGAATTAAAACAAGAGAT--------GGATCAGAAATTTGAACAAATAAAAAAGGCAGTAGATGAGAAATTAGAAGTTTCTTTTTCTGATCTGGACACTATAGATCTTGGTGGTCATGGGCAGCCAGATGAATAGAATTCTTTAAGCTAAATATGTTTCTCAATATATATTGATAATAGAATATCAATAATTTGGGCGTGGAAGAAGAATAAACGAATTTCAGAAGACTACTCAAGAAGGAATCCAGAAGAAGGAATCCAGAAGGACACCCTAT-AAGCATAAAGGAACAATATAGGGT-------------------------------------------------GCGGTGAATGACATATCCCTGTGAAGAATAAAACTTTCGGCAGGAAAGGCCTCAACTTTAGCCTGCTCTCGTGAATCCACAGTAGCGAAGAGATAAGCAGGAGGCACAGGCGACGCCACCCCTGACCTCTATAAAAGGAGGGGCCTGCCC---AGCTGAGGAAGAAGACACCATTCAGAGCAAAGCTTCCAAGCGCGCTCTCACCCTCCATTCCACCGTTCTTAGTAGTAGTGACTTTAGCCTACCTTGCATAGTATATTGAAGCAAGGAGTTGTGTTATAACGCTGTGTAAGGTAAGAACAGCTTGCTTGTACCTACCTTCGGGTTTCCCGAAAGGGAAAACCGTATGTAAGCTTATCTGTTTAATATGAAGTAATTTTCCTTAAGTATTCCTGCACGTTTGTTCTAGACAAGTGTTTATGCTAAGGACCCTATAGGAGAAACCTCTTCGGTTTGTTCTCGTTTTTAGCCTGCATCTTGCATAGGCGTCTGGAGAATCGGTATCCGTAGAGAAGTGTTCCCTTCGGGTGGAACTGCCTGGGGAGACGATAAACTCTTAGCTAGAACAAGTGTGACTTGGAATATCTTTTTAAGTTGCTTCTAAAAAGACAGATAGGTGAGGCATACGGTGAGTACCGAGTAGGACTTTACATCATCTGAAGCAAGCTTCTGAGGCTGTCTAAATAGGATTCGCCACCCTGCAAAGATCCTAAAGTTAAAATATCTCTGAAAGTGAACAGTATTGAACAGTAATTTAAACAGTAATTTGAATAGTAATCAGCCGAATAAACAGT
>chr10:9489482-9490550R
-----------------------------------------------------------------------------------------------------------------------------------------------------------------------------------------------------------------------------------------------------------------------------------------------------------------------------------------------------------------------------------------------------------------------------------------------------------------------------------------------------------------------------------------------------------------------------------------------------------------------------------------------------------------------------------------------------------------------------------------------------------------------------------------------------------------------------------------------------------------------------------------------------------------------------------------------------------------------------------------------------------------------------------------------------------------------------------------------------------------------------------------------------------------------------------------------------------------------------------------------------------------------------------------------------------------------------------------------------------------------------------------------------------------------------------------------------------------------------------------------------------------------------------------------------------------------------------------------------------------------------------------------------------------------------------------------------------------------------------------------------------------------------------------------------------------------------------------------------------------------------------------------------------------------------------------------------------------------------------------------------------------------------------------------------------------------------------------------------------------------------------------------------------------------------------------------------------------------------------------------------------------------------------------------------------------------------------------------------------------------------------------------------------------------------------------------------------------------------------------------------------------------------------------------------------------------------------------------------------------------------------------------------------------------------------------------------------------------------------------------------------------------------------------------------------------------------------------------------------------------------------------------------------------------------------------------------------------------------------------------------------------------------------------------------------------------------------------------------------------------------------------------------------------------------------------------------------------------------------------------------------------------------------------------------------------------------------------------------------------------------------------------------------------------------------------------------------------------------------------------------------------------------ATAAACGAATTTCAGAAGACTACTC--------------AAGAAGGAATCCAGAAGGACACCCTATAAAGCATAAAGGAACAATATAGGGTGCTGTGAATGAGATATCCCTGTGAAGAATATAATTTTCGGCAACTTTCAGCGGTGAATGACATATCCCTGTGAAGAATAAAACTTTCGGCAGGAAAGGCCTCAACTTTAGCCTGCTCTCGTGAATCCACAGTAGCGAAGAGATAAGCAGGAGGCACAGGCGACGCCACCCCTGACCTGTATAAAAGGAGGGGCCTGCCC---AGCTGAGGGGAGAGATACCATTCAGAGCAAAGCTTCCAAGCGCGCTCTCACCCTCTATTCCACCGTTCTTAGTAGTAGTGACTTTAGCCTACCTTACATAGTATATTGAAGTAAGGAGTTGTGTTATAACGGTGTGTAAGGTAAGAACAGCTTGCTTGTACCTACCTTCGGGTTTCCAGAAAGGAAAAACCGTATGTAAGCTTATCTGTTTAATATGAAGTAATTTTCCTTAAGTATTCCTGCACGTTTGTTCTAAACAAGTGTTTATGCTAAGGACCCTATAGGAGAAACCTCTTCGGTTTGTTCTCGTTTTTAGCCTGCATCTTGCATAGGCGTCTGGAGAATCGGTATCCGTAGAGAAGTGTTCCCTTCGGGTGGAACCGCCTGGGGAGACGATAAACTCTTAGCTAGAACAAGTGTGACTTGGAATATCTTTTTAAGTTGCTTCTAAAAAGACAGATAGGTGAGGCATACGGTGAGTACCGAGTAGGACTTTACATCATCTGAAACAAGCTTCTGAGGCTGTCTAAGTAGGATTCGCCACCCTGCAAAGATCCTAAAGTTAAAATATCTCTCGAAGTGAACAGTATTGAACAGTAATTTGAACAGTAAACTGAATAGTAATCAGCCGAATAAACAGT
>chr08:21262816-21263742R
---------------------------------------------------------------------------------------------------------------------------------------------------------------------------------------------------------------------------------------------------------------------------------------------------------------------------------------------------------------------------------------------------------------------------------------------------------------------------------------------------------------------------------------------------------------------------------------------------------------------------------------------------------------------------------------------------------------------------------------------------------------------------------------------------------------------------------------------------------------------------------------------------------------------------------------------------------------------------------------------------------------------------------------------------------------------------------------------------------------------------------------------------------------------------------------------------------------------------------------------------------------------------------------------------------------------------------------------------------------------------------------------------------------------------------------------------------------------------------------------------------------------------------------------------------------------------------------------------------------------------------------------------------------------------------------------------------------------------------------------------------------------------------------------------------------------------------------------------------------------------------------------------------------------------------------------------------------------------------------------------------------------------------------------------------------------------------------------------------------------------------------------------------------------------------------------------------------------------------------------------------------------------------------------------------------------------------------------------------------------------------------------------------------------------------------------------------------------------------------------------------------------------------------------------------------------------------------------------------------------------------------------------------------------------------------------------------------------------------------------------------------------------------------------------------------------------------------------------------------------------------------------------------------------------------------------------------------------------------------------------------------------------------------------------------------------------------------------------------------------------------------------------------------------------------------------------------------------------------------------------------------------------------------------------------------------------------------------------------------------------------------------------------------------------------------------------------------------------------ATATATACATA----------------TTGGGCGTGGAAGAAGAATAAACGAATTTCAGAAGACTACTC--------------AAGAAGGAATCCAGAAGGACACCCTATAAAGCATAAAGGAACAATATAGGGTGCGGTGAATGACA------------------------------------GCGGTGAATGACATATCCCTGTGAAGAATAAAACTTTCGGCAGGAAAGGCCTCAACTTTAGCCTGCTCTCGTGAATCCACAGTAGCGAAGAGATAAGTAGGAGGCACAGGCGACGCCACCCCTGACCTCTATAAAAGGAGGGGCCTGCCC---AGCTGAGGAGAAAGACACCATTCAGAGCAAAGCTTCCAAGCGCGCTCTCACCCTCCATTCCACCGTTCTTAGTAGTAGTGACTTTAGCCTATCTTGCATAGTATATTGAAGCAAGAAGTTGTGTTATAACGCTGTGTAAGGTAAGAACAGCTTGCTTGTACCTACCTTCGGGTTTCCCGAAAGGGAAAACCGTATGTAAGCTTATCTGTTTAATATGAAGTAATTTTCCTTAAGTATTCCTGCACGTTTGTTTTAGACAAGTGTTTATGCTAAGGACCCTATAGGAGAAACCTCTTCGGTTTGTTCTCGTTTTTAGCCTGCATCTTGCATAGGCGTCTGGAGAATCGGTATCCGTAGAGAAGTGTTCCCTTCGGGTGGAACTGCCTGGGGAGACGATAAACTCTTAGCTAGAACAAGTGTGACTTGGAATATCTTTTTAAGTTGCTTCTAAAAAGACAGATAGGTGAGGCATACGGTGAGTACCGAGTAGAACTTTACATCATCTGAAACAAGCTTCTGAGGCTGTCTAAGTAGGATTCGCCACCCTGCAAAGATCCTAAAGTTAAAATATCTCTCGAAGTGAACAGTATTGAACAGTAA------------ACTGAATAGTAATCAGCCGAATAAACAGT
>chr03:5233019-5234620F
-----------------------------------------------------------------------------------------------------------------------------------------------------------------------------------------------------------------------------------------------------------------------------------------------------------------------------------------------------------------------------------------------------------------------------------------------------------------------------------------------------------------------------------------------------------------------------------------------------------------------------------------------------------------------------------------------------------------------------------------------------------------------------------------------------------------------------------------------------------------------------------------------------------------------------------------------------------------------------------------------------------------------------------------------------------------------------------------------------------------------------------------------------------------------------------------------------------------------------------------------------------------------------------------------------------------------------------------------------------------------------------------------------------------------------------------------------------------------------------------------------------------------------------------------------------------------------------------------------------------------------------------------------------------------------------------------------------------------------------------------------------------------------------------------------------------------------------------------------------------------------------------------------------------------------------------------------------------------------------------------------------------------------------------------------------------------------------------------------------------------------------------------------------------------------------------------------------------------------------------------------------------------------------------------------------------------------------------------------------------------------------------------------------------------------------------------------------------------------------------------------------------------------------------------------------------------------------------------------------------------------------------------------------------------------------------------------------------------------------------------------------------------ATG-TTATCAATATTGAATAGCCTCTCTGAATATTTTCACTTAATAAACGGGTTATTAATGCCAGCTAATGAAGATCATGAAATAATCCAACAGAAGCCTATATATGTTGTATTTGATGGAAAGCTCCCAGGGGTCTATATATCTTTTGAAGAAATTGTGGCCCAAAAGATAGATGCTAAATTAATGGGAGGAATATCTTGGAAGAAATATAAAGACATTGATGAAGCACTAAGCCAGGCTAGAAAAATACTAGGAATAAATTATTATCTAGAGCCTGCTGCAAAAGAATATATTCAAAAATGCAAAAAAGCTAAAGGAAAGAAGACTCCAGAAATAC--------CCATTAAAACGACTATAAAAGAAGAAGGGTATTCTAAAAAACCCACATACAAAGAATGCCTAACAAAAGGAGTGGATCCATTAGATGGGGAATATATTGATTGGAAAATAATAGAAAAATTTAAAGAAGCCTCCCCACAATTAAAGAAGGAATTAAAGGAAGAAATACTTAAAGAATTAAAACAAGAAAT--------GGATCATAAATTTGAACAAATAAAAAAGGCAGTAGATGAGAAATTAGAAGTTTCTTTTTCTAATCTGGACACTATGGATCTTGGTGGTCATGGGCAACCAGATGAATAGAATTCTTTAAGCTAAATATGTTTTTCAATATATATTGATAATAGAATATCAACAATTTAGGCGTGGAAGAAGAATAAACGAATTTCAGAAGACTACTCAAGAAGGAATCCAGAAGAAGGAATCCAGAAGGACACCCTATAAAGCATAAAGGAACAATATAGGGT-------------------------------------------------GCGGTGAATGACATATCCCTGTGAAGAATAAAACTTTCGGCAGGAAAGGCCTCAACTTTAGCCTGCTCTCGTGAATCCACAGTAGCGAAGAGATAAGCAGGAGGCACAGGCGACGCCACCCCTGACCTCTATAAAAGGAGGGGCCTGCCC---AGCTGAGGAGGAAGACACCATTCAGAGCAAAGCTTCCAAGCACGCTCTCACCCTCCATTCCACCGTTCTTAGTAGTAGTGACTTTAGCCTACCTTGCATAGTATATTGAAGCAAGGAGTTGTGTTATAACGCTGTATAAGGTAAGAACAGCTTGCTTGTACCTACCTTCGGGTTTCCCGAAAGGGAAAACCGTATGTAAGCTTATCTGTTTAATATGAAGTAATTTTCCTTAAGTATTCCTGCACGTTTGTTCTAGACAAGTGTTTATGCTAAGGACCCTATAGGAGAAACCTCTTCGGTTTGTTCTCGTTTTTAGCCTGCATCTTACATAGGCGTCTAGAGAATCGGTATCCGTAGAGAAGTGTTCCCTTCGGGTGGAACTGTCTGGGGAGACGATAAACTCTTAGCTAGAACAAGTGTAACTTGGAATATCTTTTTAAGTTGCTTCTAAAAAGACAGATAGGTGAGACATACGATGAGTACCGAGTAGGACTTTACATCATCTGAAACAAGCTTCTGAGGCTGTCTAAGTAGGATTCGCCACCCTGCAAAGATCCTAAAGTTAAAATATCTCTCGAAGTGAACAGTACTGAACAGTAATTTGAACAGTAAACTGAATAGTAATCAGCCGAATAAATAGT
>chr12:23037623-23039619F
-------------------------------------------------------------------------------------------------------------------------------------------------------------------------------------------------------------------------------------------------------------------------------------------------------------------------------------------------------------------------------------------------------------------------------------------------------------------------------------------------------------------------------------------------------------------------------------------------------------------------------------------------------------------------------------------------------------------------------------------------------------------------------------------------------------------------------------------------------------------------------------------------------------------------------------------------------------------------------------------------------------------------------------------------------------------------------------------------------------------------------------------------------------------------------------------------------------------------------------------------------------------------------------------------------------------------------------------------------------------------------------------------------------------------------------------------------------------------------------------------------------------------------------------------------------------------------------------------------------------------------------------------------------------------------------------------------------------------------------------------------------------------------------------------------------------------------------------------------------------------------------------------------------------------------------------------------------------------------------------------------------------------------------------------------------------------------------------------------------------------------------------------------------------------------------------------------------------------------------------------------------------------------------------------------------------------------------------------------------------------------------------------------------------------------------------------------------------------------------------TATATTTGAACATATTAAGGGGAAAGATAATAATTTGCCTGACATGCTTTCTCGTTTACCTGAATTGCAGGTATGAAAAGATCAATGAATTACAGCGGAATTGAATGCTTCACATTTGGAGATGACAACAAGCTCAGAATATTCCCACCAAATTCATATAAATTTAAACCAAAAGA-------CCATATAATCTTAGATGAAGTGCAAGAATGCATCTTGGATAATTTTTGGTACCAATACAATAATAAAATGGAAGAAAAAGGATATATG-TTATCAATATTGAATAGCCTCTCTGAATATTTTCACTTAATAAACGGGTTATTAATGCCAGCTAATGAAGATCATGAAATAATCCAACAGAAGCCTATATATGTCGTATTTGATGGAAAGCTCCCAGGGGTCTATATATCTTTTGAAGAAATTGTGGCCCAAAAGATAGATGCTAAATTAATGGGAGGAATATCTTGGAAGAAATATAAAGACATTGATGAAGCACTAAGCCAGCCTAGAAAAATACTAGGAATAAATTATTATCTAGAGCCTGCTGCAAAAGAATATATTCAAAAATGCAAAAAAGCTAAAGGAAACAAGACTCCAGAAATAC--------CCATTAAAACGACTATAAAAGAAGAAGGGTATTCTAAAAAACCCACATACAAGGAATGCCTAACAAAAGGAGTGGATCCATTAGATGGGGAATATATTGATTAGAAAATAATAGAAAATTTTGAAGAAGCCTCCCCACAATTAAAGAAGGAATTAAAGGAAGAAATACTTAAAGAATTAAAACAAGAAAT--------GGATCAGAAGTTTGAACAAATAAAAAAGGCAGTAGATGAGAAATTATAAGTTTCTTTTTCTGATCTAGACACTATGGATCTTGGTGGTCATGGGCAACCAGATGAATAGAATTCTTTAAGCTAAATATGTTTTTCAATATATATTGATAATAGAATATCAACAATTTGGGCGTGGAAGAAGAATAAACGAATTTCAGAAGACTACTC--------------AAGAAGGAATCCAGAAGGACACCCTATAAAGCATAAAGGAACAATATAGGGTGCGGTGAATGACATATCCCTGTGAATAATATAATTTTCGGCAACTTTCGGCGGTGAATGACATATCCCTGTGAAGAATAAAACTTTCGGCAGGAAAGGCCTCAACTTTAGCCTGCTCTCGTGAATCCACAGTAGCGAAGAGATAAGCAGGAGGCACAGACGACGCCACCCCTGACCTCTATAAAAGGAGGGGCCTGCCC---AGCTGAGGAGAAAGACACCATTCAGAGCAAAGCTTCCAAGCGCGCTCTCACCCTTCATTCCACCGTTCTTAGTAGTAGTGACTTTAGCCTACCTTGCATAGTATATTGAAGCAAGGAGTTGTGTTATAACGCTGTGTAAGGTAAGAACAGCTTGCTTGTACCTACCTTCGGGTTTCCCGAAAGGGAAAACTGTATGTAAGCTTATCTGTTTAATATGAAGTAATTTTCCTTAAGTATTCCTGCACGTTTGTTCTAGACAAGTGTTTATGCTAAGGACCCTATAGGAGAAACCTCTTCGGTTTGTTTTCGTTTTTAGCCTGCATCTTGCATAGGCGTCTGGAGAATCGGTATCCGTAGAGAAGTGTTCCCTTCGGGTGGAACTGCCTGGGGAGACGATAAACTCTTAGCTAGAATAAGTGTGACTTGGAATATCTTTTTAAGTTGCTTCTAAAAAGACAGATAAGTGAGGCATACGGTGAGTACCGAGTAGGACTTTACATCATCTGAAACAAGCTTCTGAGGCTGTCTAAGTAGGATTCGCCACCCTGCAAAGATCCTAAAGTTAAAATATCTCTCGAAGTGAACAGTATTGAACAGTAATTTGAACAGTAAACTGAATAGTAATCAGCCGAATAAACAGT
>chr04:21716309-21720442F
---------------------------------------------------------------------------------------------------------------TATATATATATAACAAGCTTGTGCTGAATGTATAAAAGTAAATAAACAAAAATGGAGAAAAGAAATAGAATTAGAATCAGATGAAAAGACTTTATCTAGTAGAGTACGAGTGTTAGAAAATAGACTAAATAAACTAGAAGTAGAATTAGAGAACCTAAAAAATAATTGTGATATTAAGGCATTACTAAAGAATAAGAACATACAAAACACCGAATTTAAAGAGCAATTGATAACACTAAAAGACAGTAATACTGCTAAAATAATTCAACTAAGAGAGGCCATAACTAATTTTGGAAATAAATATATAGTAAGATTGCCTTTCAAAGAAATATTAGGTATAAGAATTCCTGTTAAAATAAAGTTGACACCCAAAGTATCTTATAAAGTATTAGCACTAGTAGACACCGGGTGTACAAAGAATATTATTCATGACAAATATTTCATAAGATGTCCTGAAATAGTTCACACAATTGACGACAATAAGGCAGAAGTTTCCACAGACATGTCCGGAATAAAGAAAATTCATAATCAGTTAGCTTATAATATTGAGGTTTACATTAATGCAACTAAATATATAATAGATGAGATTACAATAAGAGATTTGTCAATGATTAATGATGACATGATAATTGGCCTAAGGTTCCTTCAACAATCAGTACAAACCATAGTAATACATGAGCAAGGAATTACTTTTATCCCATATCAAAATAATGTTCCATATATCTCAGAGGTACGAAAGCGTGGTGGAACCTCCCC---------------CAAACTCGACAACTTAGAAGTACCTAATCTTGAGTCTGAAGAAAGAATTAATGAATATGAGCTTAGTGAGAATATAGACAACTATTATATATCAAATTCCAATATAGAGTGCATAGGACTACAAACATTTGCACCAAATTGGTATAGAGATATTAAGTCTAAAAGGGATATAGAAAAAATTATTCAAAGATTAGAAGATATCCAAATTATAGGAGAAATTCCTATAAAATATTGGGGAAAAAATGCTATTGAGTGCAAAATTAATATAATAAACCCAGAGTATATTATTAAGACTAGCCCAATAGAAGCAACTCCGAAAGACATAGAAGAATTTAAGATGCATATAGAAGAGCTGTTGAAACTAGGAGCCATAAGAGAAAGCAGAAGTCCACATAGGTCTGCAGCGTTCATAGTAAGAAATCATGCAGAAGAAGTTAGAGGTAAATCTAGGATGGTCATAAATTATAAAAGACTAAACAATAATACTATAGAAGATGCCTATAATATCCCAAATAAACAAGAATGGATTAATAGAATACAAGGTAGTAAATATTTCTCAAAATTTGACTTGAAAGCTGGATTCTGGCAAGTAAAGATGGCAGAAGAATCTATAGAATGGACTGCATTTACATGTCCTCAAGGACATTATGAATGGCTTGTTATGCCATTAGGATTAAAAAATGCACCAGCAATTTTCCAAAGAAAAATGCAGAATATATTTAACGAAAACCAAGAATTCATATTAGTCTACATAGATGACCTGTTAGTCTTCTCAAGGACTTACAAAGAACATATTGCTCATCTTGAAATATTTATTAGAAAGGTGGAACAAAATGGGTTAATATTATCCAAAAAGAAAATGGAAATATGCAAAGAAAAAATTAACTTCCTTGGACATGAAATAGGAGAGGGCAAAATTCATTTGCAAGAACATATTGCTAAGAAAATTTTACAATTTCCTGATGCTATGAATGATAAAAAGAAATTACAGCAATTCTTAGGACTTGTAAATTATGCTAGAAATCACATCAATAATTTAGCAAAGTTAGCAGGACCGTTATATGCTAAATTAAGAAAAAATGGTCAGAGATATTTTAATTCTGAAGACATTAAATTAGTAAGATTAATAAAAGAGAGGGTAAAAGAATTAAAACCTCTAGAATTACCATTAGAAGAAAGTTACTTTATCATTGAAACTGATGCATCACAACACGGTTGGGGTGCTATATTAAAGCAAAGACCTACTAAATT-TTCCGCTAAATCAGAAGAAAAAATATGTAGATATGCTTCTGGAAGTTATAAATTAAAAACTGTCAATAATACAGATAGAGAGATCATGGCAATAATCAATGCAATCAATGCCTTTAGGTTGTACTTAGGATTTAAAGAATTCACGGTTATAACCGATTGTGAAGCCATTTGTAGGTACTATAATCAGCTAAATAGCAAGAAAAGCTCAACTAGAAGATGGGTTTTATTTGAAGATATTATAACAGGAAACGGCTATAAAGTTATATTTGAACATATTAAGGGGAAAGATAATAATTTGCCTGACATGCTTTCTCGTTTACCTGAATTGCAGGTATGAAAAGATCAATGAATTACAGCGGAATTGAATGCTTCACATTTGGAGATGACAACAAGCTCAGAATATTCCCACCAAATTCATATAAATTTAAGGCAAAAGA-------CCATATAATCTTAGATGAAGTGCAAGAATGCATCTTGGATAATTTTTGGTACCAATACAATAATAAAAGGGAAGAAAAAGGATATATG-TTATCAATATTGAATAGCCTCTCTGAATATTTTCACTTAATAAATGGGTTATTAATGTCAGCTAATGAAGATCATGAAATAATCCAACAGAAGCCTATATATGTCGTATTTGATGGAAAGCTCCCAGGGGTCTATATATCTCTTGAAGAAATTGTGGCCCAAAAGATAGATGCTAAATTAATGGGAGGAATATCTTGGAAGAAAGATAAAGACATTGATGAAGCACTAAGCCAGGCTAGAAAAATACTAGGAATAAATTATTATCTAGAGCCTGCTGCAAATGAATATATTCAAAAATGCAAAAAAGCTAAAGGAAAGAAGACTCCAGAAATAC--------CCATTAAAACGACTATAAAAGAAGAAGGGTATTCTAAAAAACCCACATACAAGGAATGCCTAACAAAAGGAGTGGATCCATTAGATGGGGAATATATTGATTGGAAAATAATAGAAAAATTTGAAGAAGCCTCCCCACAATTAAAGAAGGAATTAAAGGAAGAAATACTTAAAGAATTAAAACAAGAAAT--------GGATCAGAAATTTGAATAAATAAAAAAGGCAGTAGATGAGAAATTAGAAGTTTCTTTTTCTGATCTGGACACTATGGATCTTGGTGGTCATGGGCAACCAGATGAATAGAATTCTTTAAGCTAAATATGTTTTTCAATATATATTGATAATAGAATATCAACAATTTGGGCGTGGAAGAAGAATAAACGAATTTCAGAAGACTACTCAAGAAGGAATCCAGAAGAAGGAATCCAGAAGGACACCCTATAAAGCATAAAGGAACAATATAGGGT-------------------------------------------------GCGGTGAATGACATATCCCTGTGAAGAATAAAACTTTCGGCAGGAAAGGCCTCAACTTTAGCCTGCTCTCGTGAATCCACAGTAGCGAAGAGATAAGCAGGAGGCACAGTCGACGCCACCCCTGACCTCTATAAAAGGAGGGGCCTGCCC---AGCTGAGGGGAAAGACACCATTCAGAGCAAAGCTTCCAAGCGCGCTCTCACCCTCCATTCCACCGTTCTTAGTAGTAGTGACTTTAGCCTACCTTGCATAGTATATTGAAGCAAGGAGTTGTGTTATAACGCTGTGTAAGGTAAGAACAGCTTGCTTGTACCTACCTTCGGGTTTCCCGAAAGGGAAAACCGTATGTAAGCTTATCTGTTTAATATGAAGTAATTTTCCTTAAGTATTCCTGCACGTTTGTTCTAGACAAGTGTTTATGCTAAGGACCCTATAGGAGAAACCTCTTCGGTTTGTTCTCGTTTTTAGCCTGCATCTTGCATAGGCGTCTGGAGAATCGGTATCCGTAGAGAAGTGTTTCCTTCGGGTGGAACTGCCTGGGGAGACGATAAACTCTTAGCTAGAACAAGTGTGACTTGGAATATCTTTTTAAATTGCTTCTAAAAAGACAGATAGGTGAGGCATACGGTGAGTACCGAGTAGGACTTTACATCATCTGAAATAAGCTTCCGAGGCTGTCTAAGTAGGATTCGCCACCCTGCAAAGATCCTAAAGTTAAAATATCTCTCGAAGTGAACAGTACTGAACAGTAATTTGAACAGTAAACTGAATAGTAATCAGCCGAATAAATAGT

#for S7 Fig. (eRTBVL2 related to eRTBVL-X)
>chr08:11236546-11243393R
AAAATCTATAGAATTGCCA--GGTAAGACATCATGGGAAGATAGATATT----------------TATTAAAAGCTACTAAAGATTTTGAATATATATGCA------GGGAAATGGCTTCACAGAAGT---------------CTGAATGGCTCACAAATATGAGT-------------TCATGGAGACTGCCCCAACTG-------CCCAGAGGCCATGGAGAACGATTTAATCACAATTTCAGAATAAC-----------AGAGCTACAACAAGGGTTATTAAATCTT------TTGTGGCA-----AACAAAAAACAAAAAAGAAAAAGCTCATGCCTTAAAT---GGCTTGGCATATTATTTCAAAAATTTCGTGCCCTCAGATCAAAAGATAAC--------------------AGAAAAAAGGGCTAAAATGCAAG-------ATATCCCTCATCATGAAGAAAGGTTACTAGATTATCGCGAGGAGAAATCCCGTGATGGCCAAGATAAACTTCTCATGGAAGTCGAACAATCTATGGCA------ACAGATAAGAATACCAAGGTATTCTCAGATAAGATTTTGATCTCAGCAGATCCTGCTTCGAGCATG-----GTTGCTTTCCACATAAATATCAATAACCTATT----GCAATCTTTCCCACATAATAAACCATCATCATCCACA-AAAAGGCATGATATCATTCCCCAA-----ACACCATACATACTGCATAATCATCCTAATTTATTCCTTCCACAAT-------ATATACTCCGGACTCAGCCAAAAGCACCATGTAGATCTTGTGCCTACAAAGA-------TTCTTGCAAAAAGAAACTTAAAAGCCAAAATCCCATGAGTACTACATAC------GAAAATCTCCAA---CCCAGAT----TAAGCTTCAAAACGGAA------CAAACTTTA----TCCTGCTTTGGGCAAGACATCCTCGATCTTGTTTGGCAAAAGT----------------------TTAAGGAGAGACAAATGAAAATATTCCTTGGACTCCAAGATTATTTCTTTGAT----CTTTTAGAAGGGAGA--GAAAGAAACCCAGCCATACGAGTAATCAT------ATATATGCTCCCTCTCTTAAGACTAGATAATCAGGCAATTT---------------------CTGACCCATCCTATAGATTCCTGGTTCTCAAAGCTGAGATAAATCTTCAAAGA-----TTCCGGAACCTACCCACATACAACC-------------ATGAAGAAATATCT-------------CTCCAAACCATTATAGATCAT------GGTCTTGTGAATTC----------CATATATGCAACCCTCGAT-CAGATCCTTCAATCTGATT-----TAGGAAATGCT----------GTGAAAGATGTCTGCAGG----------------------------AGACTTGGACATG-GAAGATACAGGATTATCTTCTCCTCAATACCACCAAAATTCAC-ACCACCTGTTCGTCCAGCAATTCAT-TATATATATATCATGAAGGGACAA-----TTTAATTTTCAAGAAGACGGT-------------------------CTTA--------------------GCAAACTATCGGATGAAG------------------------------------------------AGGAAGAAA-----TATATACAACAGTTGCTAATCATGAAAATTGGAGATTATTTTCTGA----------------AGCTGCAGAAATTGAAGAAGCTATCACCACA--------------------------------------GATTATGAATATC--------AGCTGGTTTTCCAAAACAAGATCACAA-----------GGATTTTTATCAGCAAATT------------------CTACAACCAAAGTTATGAATACTTCAAG---------------GGAGCAGGGCGCATAATTAAACCGGATTTTGGAAATG----AATGCTCCAAGAAAAGTTACTACAGAAACCTGGCTCAGTGG------------------------TTTCAGAAAAC-------------------------------AGAGCCATCAG---------AGATTGAC---------ACGGTACAATCAG---------CACCAATGATAATCAACGAAGATAATGAATAAAGATTTTGTCATCCCCGACAA-----AGATCACGATTC--------------------AAGATAAGGAATCTATA----CTATTCCAGAT-----AAGTATGGATCTTGGTGGCCATGGGCAACCAGATGAATAAATTAATATAAGCTAAATATGTTTTTCAATATATATTGATAATAGAATATCAATAATTTGGGCGTGGAAGAAGAATAAACGAATTTCAGAAGACTACTCAAGAAGGAATCCAGAAGAAGGAATCCAGAAGGACACCCTATAAAGCATAAAGGAACAATATAGGGTGCGGTGAATGACATATCCCTGTGAAGAATAAAACTTTCGGTGGAAAGGCCCCGGCTTTAGCTAGCTCTCGTGAATCCACAGTAGCGAAGAGATAAGCAGGAGACACAGGCGACGCCATCCCTGGCCTCTATAAAAGGAGACGTTGGCCTTCACTCC--GGAGGAAGACACCATTCAGAGCAAAGCTTTCAAGCGCGCTCTCACCCTCCATTCCACCGTTCTTAGTAGTAGTGACTTTAGCCTACCTTGCATAGTATATTGAAGCAAGGAGTTGTGTAATAACGCTGTGTAAGGTAAGAACAGCTTGCTTGTACCTACCTTCGGGTTTCCCGAAAGGGAAAACCGTATGTAAGCTTATCTGTTTAATATGAAGTAATTTTCCTTAAGTATTCCTGCACGTTTGTTCTAGACAAGTGTTTATGCTAAGGACCCTATAGGAGAAACCTCTTCGGTTTGTTCTCGTTTTTAGCCTGCATCTTGCATAGGCGTCTGGAGAATCGGTATCCGTAGAAAAGTGTTCCCTTCGGGTGGAACTGCCTGGGGAGACGATAAACTCTTAGCTAGAACAAGTGTGACTTGGAATATCTTGTTAAGTTGCTTCTAAAAAGATAGATAGGTGAGGCATACGGTAAGTACCGAGTAGGACTTTATATCATCTGAAGCAAGCTTCTGAGGCTGTCTAAATAGGATTCGCCACCCTGCAAAGATCCTAAAGTTAAAATATCTCTCGAAGTGAACAGTACTGAACAGTAA-------------------TAAACAGTAAACTGAATAGTATTCAGCCGAATAAATAGT
>chr08:11155205-11157994R
AAAAGCTATGGAATTGCCA--GGTAAGACATCATGGGAAGATAGATATT----------------TATTAAAAGCTACTAAAGATTTTGAATATATATGCA------GGGAAATGGCTTCACAGAAGT---------------CTGAATGGCTCACAAATATGAGT-------------TCATGGAGACTGCCCCAACTG-------CCCAGAGGCCATGGAGAACGATTTAATCACAATTTCAGAATAAC-----------AGAGCTACAACAAGGGTTATTAAACCTC------TTGTGGCA-----AACAAAAAACAAAAAAGAAAAAGCTCATGCCTTAAAT---GGCTTGGCATATTATTTCAAAAATTTCGTGCCCTCAGATCAAAAGATAAC--------------------AGAAAAAAGGGCTAAAATACAAG-------ATATCCCTCATCATGAGGACAGGTTACTAGATTATCGCGAGGAGAAATCCCGTGATGGCCAAGATAAACTTCCCATGGAAGTTGAACAATCTATGGCA------ACAGATAAGAATACCAAGGTATTCTCAGATAAGATTTTGATCTCAGCAGATCCTGCTTCGAGCATG-----GTTGCTTTCCACATAAATATCAATAACCTATT----GCAATCTTTTCCACATAATAAACCATCATCATCCACA-AAAAGGCATGATACCATTCCCCAA-----ACACCATACATACTGCATAATCATCCTAATTTATTCCTTCCACAAT-------ATATACTCCGGACCCAGCCAAAAGCACCATGTAGATCTTGTGCCTACAAAGA-------TTCTTGCAAAAAGAAACTTAAAAGCCAAAATCCCATGAGTACTACATAC------GAAAATCTCCAA---CCCAGAT----TAAGCTTCAAAACGGAA------CAAACTTTA----TCCTGCTTTGGGCAAGACATCCTCGATCTTGTTTGGCAAAAGT----------------------TTAAGGAGAGACAAATGAAAATATTCCTTGGACTCCAAGATTATTTCTTTGAT----CTCTTAGAAGGGAGA--GAAAGAAACCCAGCCATACGAGTAATCAT------ATATATGCTCCCTCTCTTAAGACTAGATGAACAGGCAATTT---------------------CTGACCCATCCTATAGATTCCTGGTTCTCAAAGCTGAGATAAATCTTCAAAGA-----TTCCGGAACCTACCCACATACAACC-------------ATGAAGAAATATCT-------------CTCCAAACCATTATAGATCAT------GGTCTTGTGAATTC----------CATATATGCAACCCTCGAT-CAGATCCTTCAATCTGATT-----TAGGAAACGCT----------GTGGAAGATGTCTGCAGG----------------------------AGACTTGGACATG-GAAGATACAGGATTATCTTCTCCTCAATACCACCAAAATTCAC-ACCACCTGTTCGTCCAGCAATTCAT-TATATATATATCATGAAGGGACAA-----TTTAATTTTCAAGAAGACGGT-------------------------CTTA--------------------GCAAACTATCGGATGAAG------------------------------------------------AGGAAGAAA-----TATATACAACAGTTGCTAATCATGAAAATTGGAGATTATTTTCTGA----------------AGCTGCAGAAATTGAAGAAGCTATCACCACA--------------------------------------GATTATGAATATC--------AGCTGGTTTTCCAAAACAAGATCACAA-----------GGATTTTTATCAGCAAATT------------------CTACAACCCAAGTTATGAATACTTCAAG---------------GGAGCAGGGCGCATAATTAAACCGGATTTTGGAAATG----AATGCTCCAAGAAAAGTTACTACAGAAACCTGGCTCAGTGG------------------------TTTCAGAAAAC-------------------------------AGAGCCATCAG---------AGATTGAC---------ACGGTACAATCAG---------CACCAATGATAATCAACGAAGATAATGAATAAAGATTTTGTCATCCCCGACAA-----AGATCACTATTC--------------------AAGATAAGGAATCTACA----CTATT-CAGAT-----AAGTATGGATCTTGGTGGTCATGGGCAGCCAGATGAATAGAATTCTTTAAGCTAAATATGTTTTTCAATATATATTGATAATAGAATATCAATAATTTGGGCGTGGAAGAAGAATAAACGAATTTCAGAAGACTACTCAAGAAGGAATACAGAAGAAGGAATCCAGAAGGACACCCTATAAAGCATAAAGGAACAATATAGGGTGCGGTGAATGACATATCCCTGTGAAGAATAAAACTTTCGGTGGAAAGGCCCCGGCTTTAGCTAGCTCTCGTGAATCCACAGTAGCGAAGAGATAAGCAGGAGACACAGGCGACGCCATCCCTGGCCTCTATAAAAGGAGACGTTGGCCTTCACTCCGAGGAGGAAGACACCATCCAGAGCAAAGCTTTCAAGCGCGCTCTCACCCTCCATTCCACCATTCTTAGTAGTAGTGACTTTAGCATACCTTGCATAGTATATTGAAGCAAGGAGTTGTGTAATAACGCTGTGTAAGGTAAGAACAGCTTGCTTGTACCTACCTTCGGGCTTCCCGAAAGGGAAAACCGTATGTAAGCTTATCTGTTTAATATGAAGTAATTTTCCTTAAGTATTCCTGCACGTTTGTTCTAGACAAGTGTTTATGCTAAGGACCCTATAGGAGAAACCTCTTCGGTTTGTTCTCGTTTTTAGCCTGCATCTTGCATAGGCGTCTGGAGAATCGGTATCCGTAGAGAAGTGTTCCCTTCGGGTGGAACTGCCTGGGGAGACGATAAACTCTTAGCTAGAACAAGTGTGACTTGGAATATCTTGTTAAGTTGCTTCTAAAAAGATAGATAGGTGAGGCATACGGTGAGTACCGAGTAGGACTTTACATCATCTGAAACAAGCTTCTGAGGCTGTCTAAGTAGGATTCGCCACCCTGCAAAGATCCTAAAGTTAAAATATCTCTCGAAGTGAACAGTATTGAACAGTAATGAATAGTAATCAGCCGAATAAACAGTAAACTGAATAGTATTCAGCCGAATAAATAGT
>chr08:11211872-11214728F
AAAATCTATAGAATTGCCA--GGTAAGACATCATGGGAAGATAGATATT----------------TATTAAAAGCTACTAAAGATTTTGAATATATATGCA------GGGAAATGGCTTCACAGAAGT---------------CTGAATGGCTCACAAATATGAGT-------------TCATGGAGACTGCCCCAACTG-------CCCAGAGGCCATGGAGAACGATTTAATCACAATTTCAGAATAAC-----------AGAGCTACAACAAGGGTTATTAAATCTT------TTGTGGCA-----AACAAAAAACAAAAAAGAAAAAGCTCATGCCTTAAAT---AGCTTGGCATATTATTTCAAAAATTTCGTGCCCTCAGATCAAAAGATAAC--------------------AGAAAAAAGGGCTAAAATGCAAG-------ATATCCCTCATCATGGAGAAAGGTTACTAGATTATCGCGAGGAGAAATCCCGTGATGGCCAAGATAAACTTCTCATGGAAGTCGAACAATCTATGGCA------ACAGATAAGAATACCAAGGTATTCTCAGATAAGATTTTGATCTCAGCAGATCCTGCTTCGAGCATG-----GTTGCTTTCCACATAAATATCAATAACCTATT----GCAATCTTTCCCACATAATAAACCATCATCATCCACA-AAAAGGCATGATATCATTCCCCAA-----ACACCATACATACTGCATAATCATCCTAATTTATTCCTTCCACAAT-------ATATACTCCGGACTCAGCCAAAAGCACCATGTAGATCTTGTGCCTACAAAGA-------TTCTTGCAAAAAGAAACTTAAAAGCCAAAATCCCATGAGTACTACATAC------GAAAATCTCCAA---CCCAGAT----TAAGCTTCAAAACGGAA------CAAACTTTA----TCCTGCTTTGGGCAAGACATCCTCGATCTTGTTTGGCAAAAGT----------------------TTAAGGAGAGACAAATGAAAATATTCCTTGGACTCCAAGATTATTTCTTTGAT----CTTTTAGAAGGGAGA--GAAAGAAACCCAGCCATACGAGTAATCAT------ATATATGCTCCCTCTCTTAAGACTAGATAATCAGGCAATTT---------------------CTGACCCATCCTATAGATTCCTGGTTCTCAAAGCTGAGATAAATCTTCAAAGA-----TTCCGGAACCTACCCACATACAACC-------------ATGAAGAAATATCT-------------CTCCAAACCATTATAGATCAT------GGTCTTGTGAATTC----------CATATATGCAACCCTCGAT-CAGATCCTTCAATCTGATT-----TAGGAAATGCT----------GTGAAAGATGTCTGCAGG----------------------------AGACTTGGACATG-GAAGATACAGGATTATCTTCTCCTCAATACCACCAAAATTCAC-ACCACCTGTTCGTCCAGCAATTCAT-TATATATATATCATGAAGGGACAA-----TTTAATTTTCAAGAAGACGGT-------------------------CTTA--------------------GCAAACTATCGGATGAAG------------------------------------------------AGGAAGAAA-----TATATACAACAGTTGCTAATCATGAAAATTGGAGATTATTTTCTGA----------------AGCTGCAGAAATTGAAGAAGCTATCACCACA--------------------------------------GATTATGAATATC--------AGCTGGTTTTCCAAAACAAGATCACAA-----------GGATTTTTATCAGCAAATT------------------CTACAACCAAAGTTATGAATACTTCAAG---------------GGAGCAGGGCGCATAATTAAACCGGATTTTGGAAATG----AATGCTCCAAGAAAAGTTACTACAGAAACCTGGCTCAGTGG------------------------TTTCAGAAAAC-------------------------------AGAGCCATCAG---------AGATTGAC---------ACGGTACAATCAG---------CACCAATGATAATCAACGAAGATAATGAATAAAGATTTTGTCATCCCCGACAA-----AGATCACTATTC--------------------AAGATAAGGAATCTACA----CTATT-CAGAT-----AAGTATGGATCTTGGTGGCCATGGGCAACCAGATGAATAAATTAATATAAGCTAAATATGTTTTTCAATATATATTGATAATAGAATATCAATAATTTGGGCGTGGAAGAAGAATAAACGAATTTCAGAAGACTACTCAAGAAGGAATCCAGAAGAAGGAATCCAGAAGGACACCCTATAAAGCATAAAGGAACAATATAGGGTGCGGTGAATGACATATCCATGTGAAGAATAAAACTTTCGGTGGAAAGGCCCCGGCTTTAGCTAGCTCTCGTGAATCCACAGTAGCGAAGAGATAAGCAGGAGACACAGGCGACGCCATCCCTGGCCTCTATAAAAGGAGACGTTGGCCTTCACTCCGAGGAGGAAGACACCATCCAGAGCAAAGCTTTCAAGCGCGCTCTCACCCTCCATTCCACCGTTCTTAGTAGTAGTGACTTTAGCCTACCTTGCATAGTATATTGAAGCAAGGAGTTGTGTAATAACGCTGTGTAAGGTAAGAACAGCTTGCTTGTACCTACCTTCGGGTTTCCCGAAAGGGAAAACCGTATGTAAGCTTATCTGTTTAATATGAAGTAATTTTCCTTAAGTATTCCTGCACGTTTGTTCTAGACAAGTGTTTATGCTAAGGACCCTATAGGAGAAACCTCTTCGGTTTGTTCTCGTTTTTAGCCTGCATCCTGCATAGGCGTCTGGAGAACCGGTATCCGTAGAGAAGTGTTCCCTTCGGGTGGAACTGCCTGGGGAGACGATAAACTCTTAGCTAGAACAAGTGTGACTTGGAATATCTTTTTAAGTTGCTTCTAAAAAGACAGATAGGTGAGGCATACGGTAAGTACCGAGTAGGACTTTACATCATCCGAAACAAGCTTCTGAGGCTGTCTAAATAGGATTCGCCACCCTGCAAAGATCCTAAAGTTAAAATATCTCTCGAAGTGAACAGTACTGAACAGTAA-------------------TAAACAGTAAACTGAATAGTATTCAGCCGAATAAATAGT
>chr08:11180477-11186865F
AAAATCTATAGAATTGCCA--GGTAAGACATCATGGGAAGATAGATATT----------------TATTAAAAGCTACTAAAGATTTTGAATATATATGCA------GGGAAATGGCTTCACAGAAGT---------------CTGAATGGCTCACAAATATGAGT-------------TCATGGAGACTGCCCCAACTG-------CCCAGAGGCCATGGAGAACGATTTAATCACAATTTCAGAATAAC-----------AGAGCTACAACAAGGGTTATTAAACCTC------TTGTGGCA-----AACAAAAAACAAAAAAGAAAAAGCTCATGCCTTAAAT---GGCTTGGCATATTATTTCAAAAATTTCGTGCCCTCAGAACAAAAGATAAC--------------------AGAAAAAAGGGCTAAAATGCAAG-------ATATCCCTCATCATGAAGAAAGGTTACTAGATTATCGCGAGGAGAAATCCCGTGATGGCCAAGATAAACTTCTCATGGAAGTCGAACAATCTATGGCA------ACAGATAAGAATACCAAGGTATTCTCAGATAAGATTTTGATCTCAGCAGATCCTGCTTCGAGCATG-----GTTGCTTTCCACATAAATATCAATAACCTATT----GCAATCTTTCCCACATAATAAACCATCATCATCCACA-AAAAGGCATGATATCATTCCCCAA-----ACACCATACATACTGCATAATCATCCTAATTTATTCCTTCCACAAT-------ATATACTCCGGACTCAGCCAAAAGCACCATGTAGATCTTGTGCCTACAAAGA-------TTCTTGCAAAAAGAAACTTAAAAGCCAAAATCCCATGAGTACTACATAC------GAAAATCTCCAA---CCCAGAT----TAAGCTTCAAGACGGAA------CAAACTTTA----TCCTGCTTTGGGCAAGACATCCTCGATCTTATTTGGCAAAAGT----------------------TTAAGGAGAGACAAATGAAAATATTCCTTGGACTCCAAGATTATTTCTTTGAT----CTCTTAGAAGGGAGA--GAAAGAAACCCAGCCATACGAGTAATCAT------ATATATGCTCCCTCTCTTAAGACTAGATAATCAGGCAATTT---------------------CTGACCCATCCTATAGATTCCTGGTTCTCAAAGCTGAGATAAATCTTCAAAGA-----TTCCGGAACCTACCCACATACAACC-------------ATGAAGAAATATCT-------------CTCCAAACCATTATAGATCAT------GGTCTTGTGAATTC----------CATATATGCAACCCTCGAT-CAGATCCTTCAATCTGATT-----TAGGAAATGCT----------GTGAAAGATGTCTGCAGG----------------------------AGACTTGGACATG-GAAGATACAGGATTATCTTCTCCTCAATACCACCAAAATTCAC-ACCACCTGTTCGTCCAGCAATTCAT-TATATATATATCATGAAGGGACAA-----TTTAATTTTCAAGAAGACGGT-------------------------CTTA--------------------GCAAACTATCGGATGAAG------------------------------------------------AGGAAGAAA-----TATATACAACAGTTGCTAATCATGAAAATTGGAGATTATTTTCTGA----------------AGCTGCAGAAATTGAAGAAGCTATCACCACA--------------------------------------GATTATGAATATC--------AGCTGGTTTTCCAAAACAAGATCACAA-----------GGATTTTTATCAGCAAATT------------------CTACAACCAAAGTTATGAATACTTCAAG---------------GGAGCAGGGCGCATAATTAAACCGGATTTTGGAAATG----AATGCTCCAAGAAAAGTTACTACAGAAACCTGGCTCAGTGG------------------------TTTCAGAAAAC-------------------------------AGAGCCATCAG---------AGATTGAC---------ACGGTACAATCAG---------CACCAATGATAATCAACGAAGATAATGAATAAAGATTTTGTCATCCCCGACAA-----AGATCACGATTC--------------------AAGATAAGGAATCTATA----CTATTCCAGAT-----AAGTATGGATCTTGGTGGCCATGGGCAACCAGATGAATAAATTAATATAAGCTAAATATGTTTTTCAATATATATTGATAATAGAATATCAATAATTTGGGCGTGGAAGAAGAATAAACGAATTTCAGAAGACTACTCAAGAAGGAATCCAGAAGAAGGAATCCAGAAGGACACCCTATAAAGCATAAAGGAACAATATAGGGTGCGGTGAATGACATATCCCTGTGAAGAATAAAACTTTCGGTGGAAAGGCCCCGGCTTTAGCTAGCTCTCGTGAATCCACAGTAGCGAAGAGATAAGCAGGAGACACAGGCGACGCCATCCCTGGCCTCTATAAAAGGAGACGTTGGCCTTCACTCCGAGGAGGAAGACACCATTCAGAGCAAAGCTTTCAAGCGCGCTCTCACCCTCCATTCCACCGTTCTTAGTAGTAGTGACTTTAGCCTACCTTGCATAGTATATTGAAGCAAGGAGTGGTGTAATAACGCTGTGTAAGGTAAGAACAGCTTGCTTGTACCTACCTTCGGGTTTCCCGAAAGGGAAAACCGTATGTAAGCTTATCTGTTTAATATGAAGTAATTTTCCTTAAGTATTCCTGCACGTTTGTTCTAGACAAGTGTTTATGCTAAGGACCCTATAGGAGAAACCTCTTCGGTTTGTTCTCGTTTTTAGCCTGCATCTTGCATAGGCGTCTGGAGAATCGGTATCCGTAGAGAAGTGTTCCCTTCGGGTGGAACTGCCTGGGGAGACGATAAACTCTTAGCTAGAACAAGTGTGACTTGGAATATCTTGTTAAGTTGCTTCTAAAAAGATAGATAGGTGAGGCATACGGTAAGTACCGAGTAGGACTTTACATCATCCGAAACAAGCTTCTGAGGCTGTCTAAATAGGATTCGCCACCCTGCAAAGATCCTAAAGTTAAAATATCTCTCGAAGTGAACAGTATTGAACAGTAATGAATAGTAATCAGCCGAATAAACAGTAAACTGAATAGTATTCAGCCGAATAAATAGT
>chr08:11227503-11234349F
AAAATCTATAGAATTGCCA--GGTAAGACATCATGGGAAGATAGATATT----------------TATTAAAAGCTACTAAAGATTTTGAATATATATGCA------GGGAAATGGCTTCACAGAAGT---------------CTGAATGGCTCACAAATATGAGT-------------TCATGGAGACTGCCCCAACTG-------CCCAGAGGCCATGGAGAACGATTTAATCACAATTTCAGAATAAC-----------AGAGCTACAACATGGGTTATTAAATCTT------TTGTGGCA-----AACAAAAAACAAAAAAGAAAAAGCTCATGCCTTAAAT---AGCTTGGCATATTATTTCAAAAATTTCGTGCCCTCAGATCAAAAGATAAC--------------------AGAAAAAAGGGCTAAAATGCAAG-------ATATCCCTCATCATGAAGAAAGGTTACTAGATTATCGCGAGGAGAAATCCCGTGATGGCCAAGATAAACTTCTCATGGAAGTCGAACAATCTATGGCA------ACAGATAAGAATACCAAGGTATTCTCAGATAAGATTTTGATCTCAGCAGATCCTGCTTCGAGCATG-----GTTGCTTTCCACATAAATATCAATAACCTATT----GCAATCTTTCCCACATAATAAACCATCATCATCCACA-AAAAGGCATGATATCATTCCCCAA-----ACACCATACATACTGCATAATCATCCTAATTTATTCCTTCCACAAT-------ATATACTCCGGACTCAGCCAAAAGCACCATGTAGATCTTGTGCCTACAAAGA-------TTCTTGCAAAAAGAAACTTAAAAGCCAAAATCCCATGAGTACTACATAC------GAAAATCTCCAA---CCCAGAT----TAAGCTTCAAAACGGAA------CAAACTTTA----TCCTGCTTTGGGCAAGACATCCTCGATCTTGTTTGGCAAAAGT----------------------TTAAGGAGAGACAAATGAAAATATTCCTTGGACTCCAAGATTATTTCTTTGAT----CTTTTAGAAGGGAGA--GAAAGAAACCCAGCCATACGAGTAATCAT------ATATATGCTCCCTCTCTTAAGACTAGATAATCAGGCAATTT---------------------CTGACCCATCCTATAGATTCCTGGTTCTCAAAGCTGAGATAAATCTTCAAAGA-----TTCCGGAACCTACCCACATACAACC-------------ATGAAGAAATATCT-------------CTCCAAACCATTATAGATCAT------GGTCTTGTGAATTC----------CATATATGCAACCCTCGAT-CAGATCCTTCAATCTGATT-----TAGGAAATGCT----------GTGAAAGATGTCTGCAGG----------------------------AGACTTGGACATG-GAAGATACAGGATTATCTTCTCCTCAATACCACCAAAATTCAC-ACCACCTGTTCGTCCAGCAATTCAT-TATATATATATCATGAAGGGACAA-----TTTAATTTTCAAGAAGACGGT-------------------------CTTA--------------------GCAAACTATCGGATGAAG------------------------------------------------AGGAAGAAA-----TATATACAACAGTTGCTAATCATGAAAATTGGAGATTATTTTCTGA----------------AGCTGCAGAAATTGAAGAAGCTATCACCACA--------------------------------------GATTATGAATATC--------AGCTGGTTTTCCAAAACAAGATCACAA-----------GGATTTTTATCAGCAAATT------------------CTACAACCAAAGTTATGAATACTTCAAG---------------GGAGCAGGGCGCATAATTAAACCGGATTTTGGAAATG----AATGCTCCAAGAAAAGTTACTACAGAAACCTGGCTCAGTGG------------------------TTTCAGAAAAC-------------------------------AGAGCCATCAG---------AGATTGAC---------ACGGTACAATCAG---------CACCAATGATAATCAACGAAGATAATGAATAAAGATTTTGTCATCCCCGACAA-----AGATCACGATTC--------------------AAGATAAGGAATCTATA----CTATTCCAGAT-----AAGTATGGATCTTGGTGGCCATGGGCAACCAGATGAATAAATTAATATAAGCTAAATATGTTTTTCAATATATATTGATAATAGAATATCAATAATTTGGGCGTGGAAGAAGAATAAACGAATTTCAGAAGACTACTCAAGAAGGAATCCAGAAGAAGGAATCCAGAAGGACACCCTATAAAGCATAAAGGAACAATATAGGGTGCGGTGAATGACATATCCCTGTGAAGAATAAAACTTTCGGTGGAAAGGCCCCGGCTTTAGCTAGCTCTCGTGAATCCACAGTAGCGAAGAGATAAGCAGGAGACACAGGCGACGCCATCCCTGGCCTCTATAAAAGGAGACGTTGGCCTTCACTCCGAGGAGGAAGACACCATTCAGAGCAAAGCTTTCAAGCGCGCTCTCACCCTCCATTCCACCGTTCTTAGTAGTAGTGACTTTAGCCTACCTTGCATAGTATATTGAAGCAAGGAGTTGTGTAATAACGCTGTGTAAGGTAAGAACAGCTTGCTTGTACCTACCTTCGGGTTTCCCGAAAGGGAAAACCGTATGTAAGCTTATCTGTTTAATATGAAGTAATTTTCCTTAAGTATTCCTGCACGTTTGTTCTAGACAAGTGTTTATGCTAAGGACCCTATAGGAGAAACCTCTTCGGTTTGTTCTCGTTTTTAGCCTGCATCTTGCATAGGCGTCTGGAGAATCGGTATCCGTAGAGAAGTGTTCCCTTCGGGTGGAACTGCCTGGGGAGACGATAAACTCTTAGCTAGAACAAGTGTGACTTGGAATATCTTTTTAAGTTGCTTCTAAAAAGACAGATAGGTGAGGCATACGGTGAGTACCGAGTAGGACTTTATATCATCTGAAACAAGCTTCTGAGGCTGTCTAAATAGGATTCGCCACCCTGCAAAGATCCTAAAGTTAAAATATCTCTCGAAGTGAACAGTAGTGAACAGTAA-------------------TAAACAGTAAACTGAATAGTATTCAGCCGAATAAATAGT
>chr08:11187207-11194062F
AAAATCTATAGAATTGCCA--GGTAAGACATCATGGGAAGATAGATATT----------------TATTAAAAGCTACTAAAGATTTTGAATATATATGCA------GGGAAATGGCTTCACAGAAGT---------------CTGAATGGCTCACAAATATGAGT-------------TCATGGAGACTGCCCCAACTG-------CCCAGAGGCCATGGAGAACGATTTAATCACAATTTCAGAATAAC-----------AGAGCTACAACAAGGGTTATTAAATCTT------TTGTGGCA-----AACAAAAAACAAAAAAGAAAAAGCTCATGCCTTAAAT---GGCTTGGCATATTATTTCAAAAATTTCGTGCCCTCAGATCAAAAGATAAC--------------------AGAAAAAAGGGCTAAAATGCAAG-------ATATCCCTCATCATGAAGAAAGGTTACTAGATTATCGCGAGGAGAAATCCCGTGATGGCCAAGATAAACTTCTCATGGAAGTCGAACAATCTATGGCA------ACAGATAAGAATACCAAGGTATTCTCAGATAAGATTTTGATCTCAGCAGATCCTGCTTCGAGCATG-----GTTGCTTTCCACATAAATATCAATAACCTATT----GCAATCTTTCCCACATAATAAACCATCATCATCCACA-AAAAGGCATGATATCATTCCCCAA-----ACACCATACATACTGCATAATCATCCTAATTTATTCCTTCCACAAT-------ATATACTCCGGACTCAGCCAAAAGCACCATGTAGATCTTGTGCCTACAAAGA-------TTCTTGCAAAAAGAAACTTAAAAGCCAAAATCCCATGAGTACTACATAC------GAAAATCTCCAA---CCCAGAT----TAAGCTTCAAAACGGAA------CAAACTTTA----TCCTGCTTTGGGCAAGACATCCTCGATCTTGTTTGGCAAAAGT----------------------TTAAGGAGAGACAAATGAAAATATTCCTTGGACTCCAAGATTATTTCTTTGAT----CTTTTAGAAGGGAGA--GAAAGAAACCCAGCCATACGAGTAATCAT------ATATATGCTCCCTCTCTTAAGACTAGATAATCAGGCAATTT---------------------CTGACCCATCCTATAGATTCCTGGTTCTCAAAGCTGAGATAAATCTTCAAAGA-----TTCCGGAACCTACCCACATACAACC-------------ATGAAGAAATATCT-------------CTCCAAACCATTATAGATCAT------GGTCTTGTGAATTC----------CATATATGCAACCCTCGAT-CAGATCCTTCAATCTGATT-----TAGGAAATGCT----------GTGAAAGATGTCTGCAGG----------------------------AGACTTGGACATG-GAAGATACAGGATTATCTTCTCCTCAATACCACCAAAATTCAC-ACCACCTGTTCGTCCAGCAATTCAT-TATATATATATCATGAAGGGACAA-----TTTAATTTTCAAGAAGACGGT-------------------------CTTA--------------------GCAAACTATCGGATGAAG------------------------------------------------AGGAAGAAA-----TATATACAACAGTTGCTAATCATGAAAATTGGAGATTATTTTCTGA----------------AGCTGCAGAAATTGAAGAAGCTATCACCACA--------------------------------------GATTATGAATATC--------AGCTGGTTTTCCAAAACAAGATCACAA-----------GGATTTTTATCAGCAAATT------------------CTACAACCCAAGTTATGAATACTTCAAG---------------GGAGCAGGGCGCATAATTAAACCGGATTTTGGAAATG----AATGCTCCAAGAAAAGTTACTACAGAAACCTGGCTCAGTGG------------------------TTTCAGAAAAC-------------------------------AGAGCCATCAG---------AGATTGAC---------ACGGTACAATCAG---------CACCAATGATAATCAACGAAGATAATGAATAAAGATTTTGTCATCCCCGACAA-----AGATCACTATTC--------------------AAGATAAGGAATCTACA----CTATT-CAGAT-----AAGTATGGATCTTGGTGGTCATGGGCAGCCAGATGAATAGAATTCTTTAAGCTAAATATGTTTTTCAATATATATTGATAATAGAATATCAATAATTTGGGCGTGGAAGAAGAATAAACGAATTTCAGAAGACTACTCAAGAAGGAATCCAGAAGAAGGAATCCAGAAGGACACCCTATAAAGCATAAAGGAACAATATAGGGTGCGGTGAATGACATATCCCTGTGAAGAATAAAACTTTCGGTGGAAAGGCCCCGGCTTTAGCTAGCTCTCGTGAATCCACAGTAGCGAAGAGATAAGCAGGAGACACAGGCGACGCCATCCCTGGCCTCTATAAAAGGAGACGTTGGCCTTCACTCCGAGGAGGAAGACACCATTCAGAGCAAAGCTTTCAAGCGCGCTCTCACCCTCCATTCCACCGTTCTTAGTAGTAGTGACTTTAGCCTACCTTGCATAGTATATTGAAGCAAGGAGTGGTGTAATAACGCTGTGTAAGGTAAGAACAGCTTGCTTGTACCTACCTTCGGGTTTCCCGAAAGGGAAAACCGTATGTAAGCTTATCTGTTTAATATGAAGTAATTTTCCTTAAGTATTCCTGCACGTTTGTTCTAGACAAGTGTTTATGCTAAGGACCCTATAGGAGAAACCTCTTCGGTTTGTTCTCGTTTTTAGCCTGCATCCTGCATAGGCGTCTGGAGAACCGGTATCCGTAGAGAAGTGTTCCCTTCGGGTGGAACTGTCTGGGGAGACGATAAACTCTTAGCTAGAACAAGTGTGACTTGGAATATCTTTTTAAGTTGCTTCTAAAAAGACAGATAGGTGAGGCATACGGTAAGTACCGAGTAGGACTTTACATCATCCGAAACAAGCTTCTGAGGCTGTCTAAATAGGATTCGCCACCCTGCAAAGATCCTAAAGTTAAAATATCTCTCGAAGTGAACAGTACTGAACAGTAA-------------------TAAACAGTAAACTGAATAGTATTCAGCCGAATAAATAGT
>chr09:14493662-14495268F
----------------------------------------------------------------------------------------------------------------------------------------------------------------------------------------------------------------------------------------------------------------------------------------------------------------------------------------------------------------------------------------------------------------------------------------------------------------------------------------------------------------------------------------------------------------------------------------------------------------------------------------------------------------------------------------------------------------------------------------------------------------------------------------------------------------------------------------------------------------------------------------------------------------------------------------------------------------------------------------------------------------------------------------------------------------------------------------------------------------------------------------------------------------------------------------------------------------------------------------------------------------------------------------------------------------------------------------------------------------------------------------------------------------------------------------------------------------------------------------------------------------------------------------CTTGGACATG-GAAGATACAGGATTATCTTCTCCTCAATACCACCAAAATTCAC-ACCACCTGTTCGTCCAGCAATTCAT-TATATATATATCATGAAGGGACAA-----TTTAATTTTCAAGAAGACGGT-------------------------CTTA--------------------GCAAACTATCGGATGAAG------------------------------------------------AGGAAGAAA-----TATATACAACAGTTGCTAATCATGAAAATTGGAGATTATTTTCTGA----------------AGCTGCAGAAATTGAAGAAGCTATCACCACA--------------------------------------GATTATGAATATC--------AGCTGGTTTTCCAAAACAAGATCACAA-----------GGATTTTTATCAGCAAATT------------------CTACAACCAAAGTTATGAATACTTCAAG---------------GGAGCAGGGCGCATAATTAAACCGGATTTTGGAAATG----AATGCTCCAAGAAAAGTTACTACAGAAGCCTGGCTCAGTGG------------------------TTTCAGAAAAC-------------------------------AGAACCATCAG---------AGATTGAC---------ACGGTACAATCAG---------CACCAATGATAATCAACGAAGATAATGAATAAAGATCTTGTCATCCCCGACAA-----AGATCACTATTC--------------------AAGATCAGGAATCTACA----CTATTCCAGAT-----AACAATGGATCTTGGTGGCCATGGGCAGCCAGATGAATAGAATTCTTTAAGCTAAATATGTTTTTCAATATATATTGATAATAGAATATCAATAATTTGGGCGTGGAAGAAGAATAAACGAATTTCAGAAGACTACTCAAGAAGGAATCCAGAAGAAGGAATCCAGAAAGACACCCTATAAAGCATAAAGGAACAATATAGGGTGCGGTGAATGACATATCCCTGTGAAGAATAAAACTTTCGGTGGAAAGGCCTCGACTTTAGCTAGCTCTCGTGAATCCACAGTAGCGAAGAGATAAGCAGGAGACACAGGCGAAGCCATCTCTGGCCTCTATAAAAGGAGACGTTGGCCTTCACTCCGAAGACGAAGACACCATTCAGAGCAAAGCTTCCAAGCGCGCTCTCACCCTCCATTCCACCGTTCTTAGTAGTAGTGACTTTAGCCTACCTTGCATAGTATATTGAAGCAAGGAGTTGTGTTATAACGCTGTGTAAGGTAAGAACAGCTTGCTTGTACCTACCTTCGGGTTTCCCGAAAGGGAAAACCGTATGTAAGCTTATCTGTTTAATATGAAGTAATTTTCCTTAAGTATTCCTGCACGTTTGTTCTAGACAAGTGTTTATGCTAAGGACCCTATAGGAGAAACCTCTTCGGTTTGTTCTCGTTTTTAGCCTGCATCTTGCATAGGCGTCTGGAGAATCGGTATCCGTAGAGAAGTGTTCCCTTCGGGTGGAACTGCCTGGGGAGACGATAAACTCTTAGCTAGAACAAGTGTGGCTTGGAATATCTTTTTAAGTTGCTTCTAAAAAGACAGATAGGTGAGGCATACGGTGAGTACCGAGTAGGACTTTATATCATCTGAAGCAAGCTTCTGAGGCTGTCTAAATAGGATTCGCCACCCTGCAAAGATCCTAAAGTTAAAATATCTCTCGAAGTGAACAGTATTGAACAGTAATGAATAGTAATCAGCCGAATAAACAGTAAACTGAATAGTATTCAGCCGAATAAATAGT
>chr08:11200723-11206750R
AGAATGCATAGGACTACAATCATTTGCACCAAATTGGTATAGAGATATTAAGTCTAAAAGGGATATAGAAAAAATTATTCAAAGATTAGAAGATATCCAAATTATAGGAGAAATTCCTATGAAATATTGGGAGAAAAATGCTATTGAGTGTAAAATTAATATAATCAACCCAGAATATATCATTAAGACTAGCCCAATAGAGGCAACTCCGAAAGACAT--AGAAGAATTTAA-AATGCATATAGAAGAACTGTTGAAACTAGGAGCCATAAGAGAGAGCAGAAGTCCACACAGGTCTGCAGCATTCATAGTAAGAAATCATGCAGAAGAAGTTAGAG--GTAAATCTAGGATGGTCATAAATTATAAAAGACTAAATGATAATACTATAGAAGATGCCTATAATATTCCAAATAAGCAAGAATGGATTAATAGAATACAAGGTAGTAAATATTTCTCAAAATTTGACTTGAAAGCTGGATTCTGGCAAATAAAGAT-------------------------------GGCAGAAGAATCTATAGAATGGACTGCATTTACATGTCCTCAAGGACATTATGAATGGCTTGTTATGCCATTAG-----GATTAAAAAATGCACCAGCAATTTTCCAAAGGAAAATGCAGAATATATTTAACGAAAAC---------CAAGAATTCATATTAGTCCACATAGATGACCTGTTAGTCTTCTCAAGGACTTACAAAGAACATATTGC----TCATCTTGAAATATTTTTTAGAAAGGTGGAACAAAATGGGTTAATATTATCCAAAAAGAAAATGGAAA---TATGCAAAGAAAAAATTAATTTCCTTGGACATGAAATAGGAGAGGGCAAAATTCATTTGCAAGAACATATTGCTAAGAAAATTTTAGAATTTCCTGATGCTATGAATGATAAAAAGAAATTACAGCAATTCTTAGGGCTTGTAAATTATGCTAGAAATCACATCAATAATTTAGCAAAGTTAGCAGGACCGTTATATGCTAAATTAAGAAAAAATGGTCAGAGATAT---TTTAATTCTGAAGACATCAAATTAGTAAGATTAATAAAAGAGAGGGTGAAAGAATTAAAACCTCTAGAATTACCATTAGAAGAGAGTTACTTTAT-TATTGAAACTGATGCATC--GCAGCTTGGTTGGGGTGCTGTATTAAAACAAAGGCCTACTAAATATTCAT-----CTAAGTCAGAAGAAAAAGTTTGTAGGTATGCTTCTGGAAGCTATAAATTAAAAACCGTAGGCAATACAGATAGAGAAATACTTGCAATAATCAATGCGATAAATGCCTTTAGGTTATATTTAGGGTTCAAAGAATTTACGGTTAGAACAGAT-TGCGAAGCTATATGTAGATATTATAATCAGCTTAATAGCAAGAAGAGTTCCACTAGGAGGTGGATTTTATTTGAAGATATCATTACTGGCAACGGATATAAAGTTATATTTGAACATATTAAGGGAAAAGATAATCATTTACCTGAT-----CTACTCTCGCGATCGCCTATTT-TGCAGGAATGAAGAAGTCCATGAATTATAATGGAATTGAGTTCTTCACGTTTGGAGAAGACAATAAGCTCAAAGTATTCCCACCGAATACCTATAAGTTTAAGCCAAAAACCCACATAATATTAGATGAAGTCCAAGAATGCATTTTAGATAATTTCTGGTATCAATACAATAATAAGAGGGAAGAAAAAGGCTATATGCTATCAATATTAAACAGTCTTGCTGAATATTTCCATCTAATGAATGATATAATGCCAACATCAGAAAATAATGAAGTGAT-ACCGCAAAAACCCATATATGTTGTTTTTGACGGAAAGCTTCCTGGAGTGTACATATCTTTTGAAGAGATAGTAGCCCAAAAAATAGATGCAAAATTAATGGGTGGATTGTCATGGAAAAAATATATAGATTTTGATGAAGCTTTAACTCAGGCTAGAAAAATATTAGGAATAAATTATTATCTAGAGCCTGCTGCAAAAGAATATA----TTCAAAAATGCAAAAAAGCTAAAGGAAAGAAGACTTCAGAAAT---ACCCATTAAGATGACTATAAAAGAAGAAGGGTTTTTTAAAAAACCCACATACAAGGAATGCTTAACAAAAGGAGTGGATCCATTAGATGGGGAATATATTGATTGGAAGATAATAGAAAAATTTGAAGAAGCCTCCCCACAGTTAAAGAAGGAATTGAAGGAAGAAATACTTAAAGAATTAAAACAAGAAATGGATCAGAAATTTGAGCAAATAAAAAAGGCAATAGATGAGAAATTAGAAGTTTCTTTTTCTGATTTGGACACAATGGATCTTGGTGGCCATGGGCAACCAGATGAATAAATTAATATAAGCTAAATATGTTTTTCAATATATATTGATAATAGAATATCAATAATTTGGGCGTGGAAGAAGAATAAACGAATTTCAGAAGACTACTCAAGAAGGAATCCAGAAGAAGGAATCCAGAAGGACACCCTATAAAGCATAAAGGAACAATATAGGGTGCGGTGAATGACATATCCCTGTGAAGAATAAAACTTTCGGTGGAAAGGCCCCGGCTTTAGCTAGCTCTCGTGAATCCACAGTAGCGAAGAGATAAGCAGGAGACACAGGCGACGCCATCCCTGGCCTCTATAAAAGGAGACGTTGGCCTTCACTCCGAGGAGGAAGACACCATTCAGAGCAAAGCTTTCAAGCGCGCTCTCACCCTCCATTCCACCGTTCTTAGTAGTAGTGACTTTAGCCTACCTTGCATAGTATATTGAAGCAAGGAGTGGTGTAATAACGCTGTGTAAGGTAAGAACAGCTTGCTTGTACCTACCTTCGGGTTTCCCGAAAGGGAAAACCGTATGTAAGCTTATCTGTTTAATATGAAGTAATTTTCCTTAAGTATTCCTGCACGTTTGTTCTAGACAAGTGTTTATGCTAAGGACCCTATAGGAGAAACCTCTTCGGTTTGTTCTCGTTTTTAGCCTGCATCTTGCATAGGCGTCTGGAGAATCGGTATCCGTAGAGAAGTGTTCCCTTCGGGTGGAACTGCCTGGGGAGACGATAAACTCTTAGCTAGAACAAGTGTGACTTGGAATATCTTGTTAAGTTGCTTCTAAAAAGATAGATAGGTGAGGCATACGGTGAGTACCGAGTAGGACTTTACATCATCCGAAATAAGCTTCTGAGGCTGTCTAAATAGGATTCGCCACCCTGCAAAGATCCTAAAGTTAAAATATCTCTCGAAGTGAACAGTATTGAACAGTAATGAATAGTAATCAGCCGAATAAACAGTAAACTGAATAGTATTCAGCCGAATAAATAGT
>chr08:11243780-11247517F
AGAATGCATAGGACTACAATCATTTGCACCAAATTGGTATAGAGATATTAAGTCTAAAAGGGATATAGAAAAAATTATTCAAAGATTAGAAGATATCCAAATTATAGGAGAAATTCCTATGAAATATTGGGAGAAAAATGCTATTGAGTGTAAAATTAATATAATCAACCCAGAATATATCATTAAGACTAGCCCAATAGAGGCAACTCCGAAAGACAT--AGAAGAATTTAA-AATGCATATAGAAGAACTGTTGAAACTAGGAGCCATAAGAGAGAGCAGAAGTCCACACAGGTCTGCAGCATTCATAGTAAGAAATCATGCAGAAGAAGTTAGAG--GTAAATCTAGGATGGTCATAAATTATAAAAGACTAAATGATAATACTATAGAAGATGCCTATAATATTCCAAATAAGCAAGAATGGATTAATAGAATACAAGGTAGTAAATATTTCTCAAAATTTGACTTGAAAGCTGGATTCTGGCAAATAAAGAT-------------------------------GGCAGAAGAATCTATAGAATGGACTGCATTTACATGTCCTCAAGGACATTATGAATGGCTTGTTATGCCATTAG-----GATTAAAAAATGCACCAGCAATTTTCCAAAGGAAAATGCAGAATATATTTAACGAAAAC---------CAAGAATTCATATTAGTCCACATAGATGACCTGTTAGTCTTCTCAAGGACTTACAAAGAACATATTGC----TCATCTTGAAATATTTTTTAGAAAGGTGGAACAAAATGGGTTAATATTATCCAAAAAGAAAATGGAAA---TATGCAAAGAAAAAATTAATTTCCTTGGACATGAAATAGGAGAGGGCAAAATTCATTTGCAAGAACATATTGCTAAGAAAATTTTAGAATTTCCTGATGCTATGAATGATAAAAAGAAATTACAGCAATTCTTAGGGCTTGTAAATTATGCTAGAAATCACATCAATAATTTAGCAAAGTTAGCAGGACCGTTATATGCTAAATTAAGAAAAAATGGTCAGAGATAT---TTTAATTCTGAAGACATCAAATTAGTAAGATTAATAAAAGAGAGGGTGAAAGAATTAAAACCTCTAGAATTACCATTAGAAGAGAGTTACTTTAT-TATTGAAACTGATGCATC--GCAGCTTGGTTGGGGTGCTGTATTAAAACAAAGGCCTACTAAATATTCAT-----CTAAGTCAGAAGAAAAAGTTTGTAGGTATGCTTCTGGAAGCTATAAATTAAAAACCGTAGGCAATACAGATAGAGAAATACTTGCAATAATCAATGCGATAAATGCCTTTAGGTTATATTTAGGGTTCAAAGAATTTACGGTTAGAACAGAT-TGCGAAGCTATATGTAGATATTATAATCAGCTTAATAGCAAGAAGAGTTCCACTAGGAGGTGGATTTTATTTGAAGATATCATTACTGGCAACGGATATAAAGTTATATTTGAACATATTAAGGGAAAAGATAATCATTTACCTGAT-----CTACTCTCGCGATCGCCTATTT-TGCAGGAATGAAGAAGTCCATGAATTATAATGGAATTGAGTTCTTCACGTTTGGAGAAGACAATAAGCTCAAAGTATTCCCACCGAATACCTATAAGTTTAAGCCAAAAACCCACATAATATTAGATGAAGTCCAAGAATGCATTTTAGATAATTTCTGGTATCAATACAATAATAAGAGGGAAGAAAAAGGCTATATGCTATCAATATTAAACAGTCTTGCTGAATATTTCCATCTAATGAATGATATAATGCCAACATCAGAAAATAATGAAGTGAT-ACCGCAAAAACCCATATATGTTGTTTTTGACGGAAAGCTTCCTGGAGTGTACATATCTTTTGAAGAGATAGTAGCCCAAAAAATAGATGCAAAATTAATGGGTGGATTGTCATGGAAAAAATATATAGATTTTGATGAAGCTTTAACTCAGGCTAGAAAAATATTAGGAATAAATTATTATCTAGAGCCTGCTGCAAAAGAATATA----TTCAAAAATGCAAAAAAGCTAAAGGAAAGAAGACTTCAGAAAT---ACCCATTAAGATGACTATAAAAGAAGAAGGGTTTTTTAAAAAACCCACATACAAGGAATGCTTAACAAAAGGAGTGGATCCATTAGATGGGGAATATATTGATTGGAAGATAATAGAAAAATTTGAAGAAGCCTCCCCACAGTTAAAGAAGGAATTGAAGGAAGAAATACTTAAAGAATTAAAACAAGAAATGGATCAGAAATTTGAGCAAATAAAAAAGGCAATAGATGAGAAATTAGAAGTTTCTCTTTCTGATTTGGACACAATGGATCTTGGTGGCCATGGGCAACCAGATGAATAAATTAATATAAGCTAAATATGTTTTTCAATATATATTGATAATAGAATATCAATAATTTGGGCGTGGAAGAAGAATAAACGAATTTCAGAAGACTACTCAAGAAGGAATCCAGAAGAAGGAATCCAGAAGGACACCCTATAAAGCATAAAGGAACAATATAGGGTGCGGTGAATGACATATCCCTGTGAAGAATAAAACTTTCGGTGGAAAGGCCCCGGCTTTAGCTAGCTCTCGTGAATCCACAGTAGCGAAGAGATAAGCAGGAGACACAGGCGACGCCATCCCTGGCCTCTATAAAAGGAGACGTTGGCCTTCACTCCGGAGACGAAGACACCATTCAGAGCAAAGCTTTCAAGCGCGCTCTCACCCTCCATTCCACCGTTCTTAGTAGTAGTGATTTTAGCCTACCTTGCATAGTATATTGAAGCAAGGAGTTGTGTAATAACGCTGTGTAAGGTAAGAACAGCTTGCTTGTACCTACCTTCGGGTTTCCCGAAAGGGAAAACCGTATGTAAGCTTATCTGTTTAATATGAAGTAATTTTCCTTAAGTATTCCTGCACGTTTGTTCTAGACAAGTGTTTATGCTAAGGACCCTATAGGAGAAACCTCTTCGGTTTGTTCTCGTTTTTAGCCTGCATCTTGCATAGGCGTCTGGAGAATCGGTATCCGTAGAGAAGTGTTCCCTTCGGGTGGAACTGCCTGGGGAGACGATAAACTCTTAGCTAGAACAAGTGTGACTTGGAATATCTTGTTAAGTTGCTTCTAAAAAGATAGATAGGTGAGGCATACGGTAAGTACCGAGTAGGACTTTACATCATCCGAAACAAGCTTCTGAGGCTGTCTAAATAGGATTCGCCACCCTGCAAAGATCCTAAAGTTAAAATATCTCTCGAAGTGAACAGTATTGAACAGTAATGAATAGTAATCAGCCGAATAAACAGTAAACTGAATAGTATTCAGCCGAATGAACAGT
>chr08:11206747-11211758F
AGAATGCATAGGACTACAATCATTTGCACCAAATTGGTATAGAGATATTAAGTCTAAAAGGGATATAGAAAAAATTATTCAAAGATTAGAAGATATCCAAATTATAGGAGAAATTCCTATGAAATATTGGGAGAAAAATGCTATTGAGTGTAAAATTAATATAATCAACCCAGAATATATCATTAAGACTAGCCCAATAGAGGCAACTCCGAAAGACAT--AGAAGAATTTAA-AATGCATATAGAAGAACTGTTGAAACTAGGAGCCATAAGAGAGAGCAGAAGTCCACACAGGTCTGCAGCATTCATAGTAAGAAATCATGCAGAAGAAGTTAGAG--GTAAATCTAGGATGGTCATAAATTATAAAAGACTAAATGATAATACTATAGAAGATGCCTATAATATTCCAAATAAGCAAGAATGGATTAATAGAATACAAGGTAGTAAATATTTCTCAAAATTTGACTTGAAAGCTGGATTCTGGCAAATAAAGAT-------------------------------GGCAGAAGAATCTATAGAATGGACTGCATTTACATGTCCTCAAGGACATTATGAATGGCTTGTTATGCCATTAG-----GATTAAAAAATGCACCAGCAATTTTCCAAAGGAAAATGCAGAATATATTTAACGAAAAC---------CAAGAATTCATATTAGTCTACATAGATGACCTGTTAGTCTTCTCAAGGACTTACAAAGAACATATTGC----TCATCTTGAAATATTTTTTAGAAAGGTGGAACAAAATGGGTTAATATTATCCAAAAAGAAAATGGAAA---TATGCAAAGAAAAAATTAATTTCCTTGGACATGAAATAGGAGAGGGCAAAATTCATTTGCAAGAACATATTGCTAAGAAAATTTTAGAATTTCCTGATGCTATGAATGATAAAAAGAAATTACAGCAATTCTTAGGGCTTGTAAATTATGCTAGAAATCACATCAATAATTTAGCAAAGTTAGCAGGACCGTTATATGCTAAATTAAGAAAAAATGGTCAGAGATAT---TTTAATTCTGAAGACATCAAATTAGTAAGATTAATAAAAGAGAGGGTGAAAGAATTAAAACCTCTAGAATTACCATTAGAAGAGAGTTACTTTAT-TATTGAAACTGATGCATC--GCAGCTTGGTTGGGGTGCTGTATTAAAACAAAGGCCTACTAAATATTCAT-----CTAAGTCAGAAGAAAAAGTTTGTAGGTATGCTTCTGGAAGCTATAAATTAAAAACCGTAGGCAATACAGATAGAGAAATACTTGCAATAATCAATGCGATAAATGCCTTTAGGTTATATTTAGGGTTCAAAGAATTTACGGTTAGAACAGAT-TGCGAAGCTATATGTAGATATTATAATCAGCTTAATAGCAAGAAGAGTTCCACTAGGAGGTGGATTTTATTTGAAGATATCATTACTGGCAACGGATATAAAGTTATATTTGAACATATTAAGGGAAAAGATAATCATTTACCTGAT-----CTACTCTCGCGATCGCCTATTT-TGCAGGAATGAAGAAGTCCATGAATTATAATGGAATTGAGTTCTTCACGTTTGGAGAAGACAATAAGCTCAAAGTATTCCCACCGAATACCTATAAGTTTAAGCCAAAAACCCACATAACATTAGATGAAGTCCAAGAATGCATTTTAGATAATTTCTGGTATCAATACAATAATAAGAGGGAAGAAAAAGGCTATATGCTATCAATATTAAACAGTCTTGCTGAATATTTCCATCTAATGAATGATATAATGCCAACATCAGAAAATAATGAAGTGAT-ACCGCAAAAACCCATATATGTTGTTTTTGACGGAAAGCTTCCTGGAGTGTACATATCTTTTGAAGAGATAGTAGCCCAAAAAATAGATGCAAAATTAATGGGTGGATTGTCATGGAAAAAATATATAGATTTTGATGAAGCTTTAACTCAGGCTAGAAAAATATTAGGAATAAATTATTATCTAGAGCCTGCTGCAAAAGAATATA----TTCAAAAATGCAAAAAAGCTAAAGGAAAGAAGACTTCAGAAAT---ACCCATTAAGATGACTATAAAAGAAGAAGGGTTTTTTAAAAAACCCACATACAAGGAATGCTTAACAAAAGGAGTGGATCCATTAG-------ATATATTGATTGGAAGATAATAGAAAAATTTGAAGAAGCCTCCCCACAGTTAAAGAAGGAATTGAAGGAAGAAATACTTAAAGAATTAAAACAAGAAATGGATCAGAAATTTGAGCAAATAAAAAAGGCAATAGATGAGAAATTAGAAGTTTCTTTTTCTGATTTGGACACAATGGATCTTGGTGGCCATGGGCAACCAGATGAATAAATTAATATAAGCTAAATATGTTTTTCAATATATATTGATAATAGAATATCAATAATTTGGGCGTGGAAGAAGAATAAACGAATTTCAGAAGACTACTCAAGAAGGAATCCAGAAGAAGGAATCCAGAAGGACACCCTATAAAGCATAAAGGAACAATATAGGGTGCGGTGAATGACATATCCCTGTGAAGAATAAAACTTTCGGCGGAAAGGCCTCGGCTTTAGCTAGCTCTCGTGAATCCACAGTAGCGAAGAGATAAGCAGGAGACACAGGCGACGCCATCCCTGGCCTCTATAAAAGGAGACGTTGGCCTTCACTCCGAGGAGGAAGACACCATTCAGAGCAAAGCTTTCAAGCGCGCTCTCACCCTCCATTCCACCGTTCTTAGTAGTAGTGATTTTAGCCTACCTTGCATAGTATATTGAAGCAAGGAGTTGTGTAATAACGCTGTGTAAGGTAAGAACAGCTTGCTTGTACCTACCTTCGGGTTTCCCGAAAGGGAAAACCGTATGTAAGCTTATCTGTTTAATATGAAGTAATTTTCCTTAAGTATTCCTGCACGTTTGTTCTAGACAAGTGTTTATGCTAAGGACCCTATAGGAGAAACCTCTTCGGTTTGTTCTCGTTTTTAGCCTGCATCTTGCATAGGCGTCTGGAGAATCGGTATCCGTAGAGAAGTGTTCCCTTCGGGTGGAACTGCCTGGGGAGACGATAAACTCTTAGCTAGAACAAGTGTGACTTGGAATATCTTGTTAAGTTGCTTCTAAAAAGATAGATAGGTGAGGCATACGGTAAGTACCGAGTAGGACTTTACATCATCCGAAACAAGCTTCTGAGGCTGTCTAAATAGGATTCGCCACCCTGCAAAGATCCTAAAGTTAAAATATCTCTCGAAGTGAATAGTATTGAACAGTAA-------------------TGAACAGTAAACTGAATAGTAATCAGCCGAATAAATAGT
[truncated: 125,040 more chars]
