# Supplementary material
Source: publisher figshare collection journal article supplement (https://plos.figshare.com/articles/dataset/_/5160220)
Supplement: Supplementary file 1 [file 1 › S4 Fig.pdf]

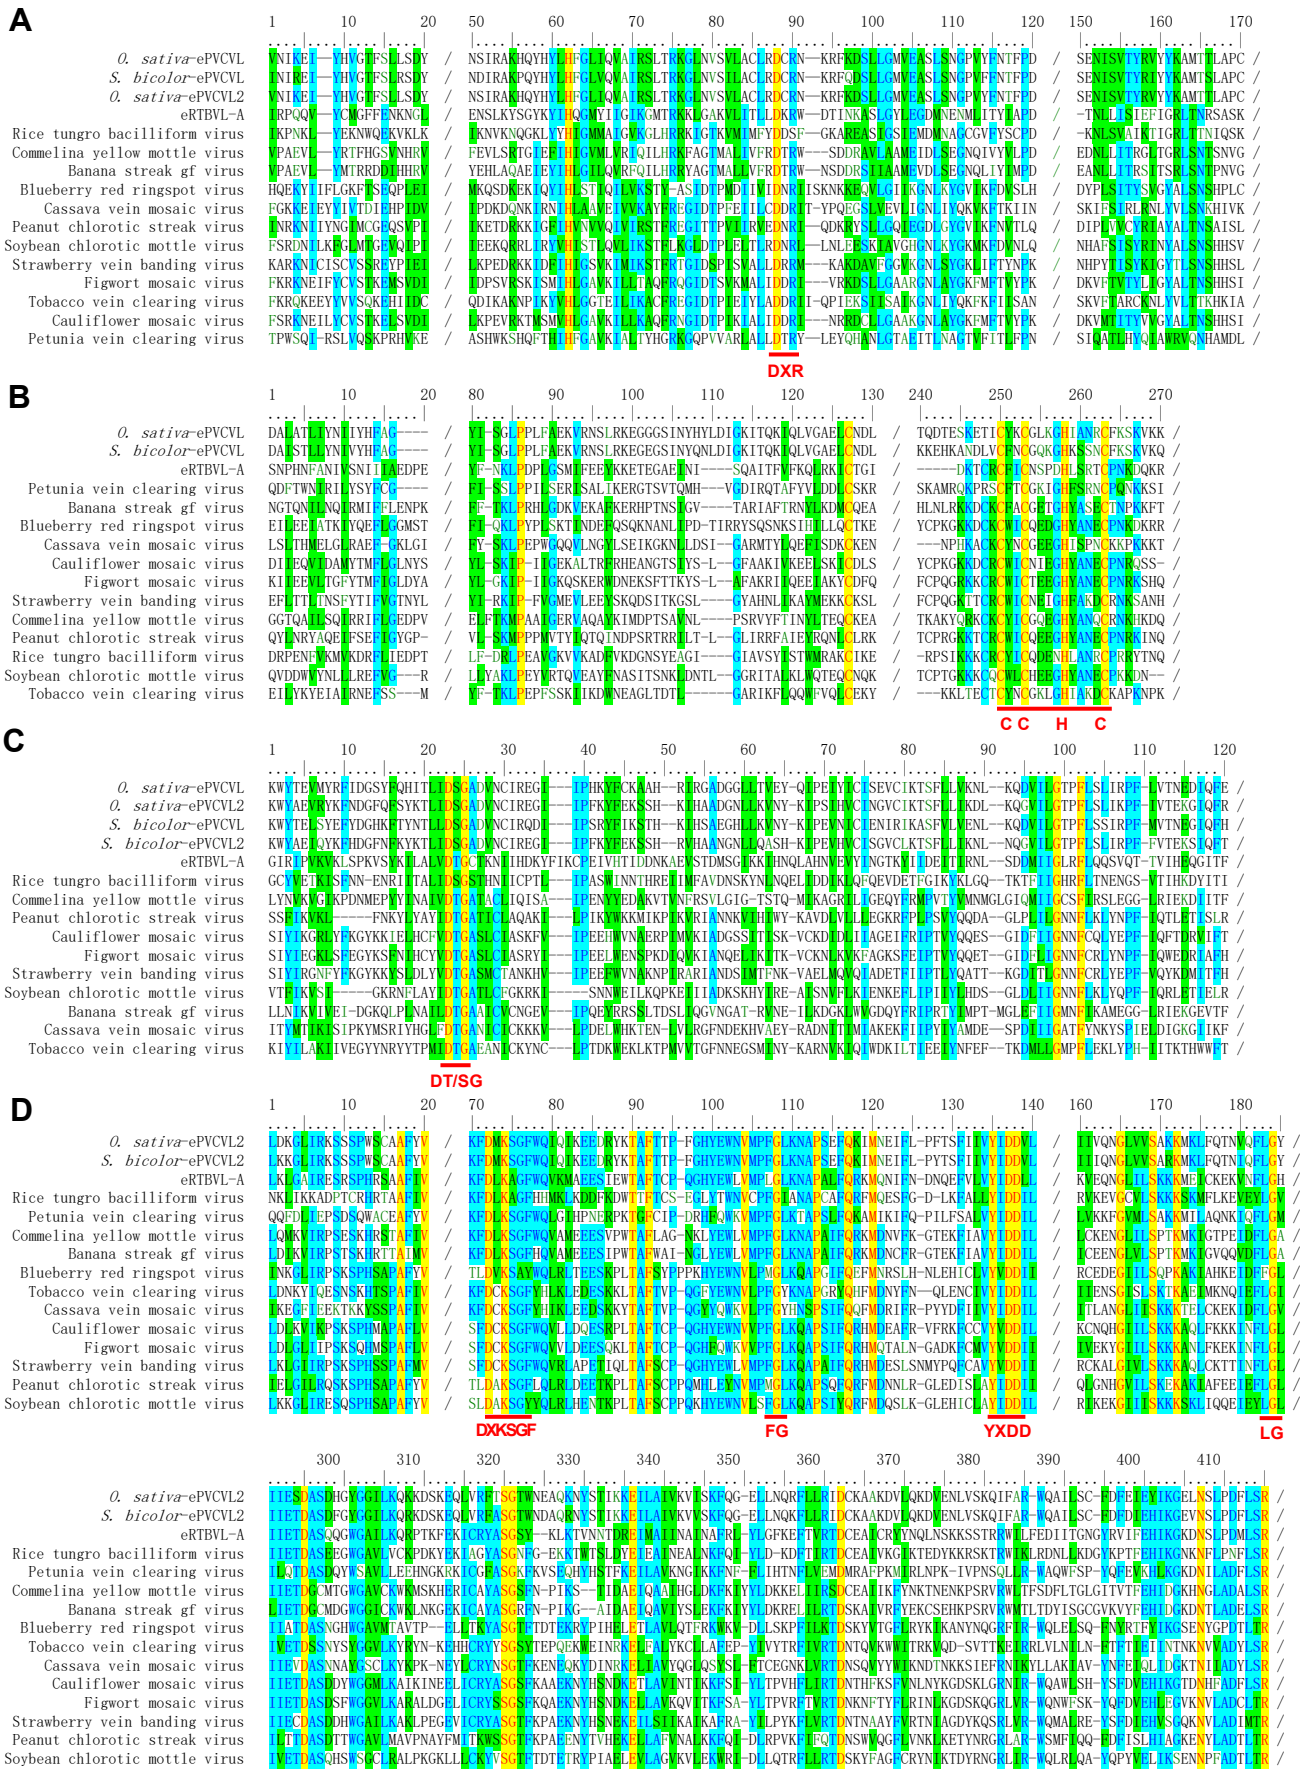

**S4 Fig. Motif alignments for the four essential domains of grass endogenous PRVs and various extant PRVs.** Portions of sequence alignments are shown for conserved motifs in MP (A), CP (B), PR (C), and RT/RH (D) domains. Each conserved motif is indicated by a red line. Slashes represent sequence omissions.
