# Supplementary material
Source: publisher figshare collection journal article supplement (https://plos.figshare.com/articles/dataset/_/5160220)
Supplement: Supplementary file 1 [file 1 › S4 Table.pdf]

**S4 Table. Mapping of ePVCVL and ePVCVL2 loci in the *O. sativa* genome to other *Oryza* genomes.**

| Information of ePVCVL and ePVCVL2 loci in the <i>O. sativa</i> genome |                                                               | Mapping into the other <i>Oryza</i> genomes <sup>c</sup> |                            |                                 |                           |                          | Remark       |
|-----------------------------------------------------------------------|---------------------------------------------------------------|----------------------------------------------------------|----------------------------|---------------------------------|---------------------------|--------------------------|--------------|
| Locus number (position) <sup>a</sup>                                  | Segments <sup>b</sup>                                         | <i>O. glaberrima</i>                                     | <i>O. glumaepatula</i>     | <i>O. longistaminata</i>        | <i>O. meridionalis</i>    | <i>O. punctata</i>       |              |
| Locus1 (1:8840504-8849149)                                            | ePVCVL-OS1, ePVCVL2-OS1                                       | NO (1:6923482-6923778)                                   | NO (1:10192607-10194752)   | NO (Scaffold140566:≈267573)     | NO (1:≈8993855)           | NO (1:≈8415586)          | specific     |
| Locus2 (1:23902732-23908392)                                          | ePVCVL-OS2                                                    | NO (1:16686414-16686464)                                 | NO (1:26043345-26062879)   | NO (Scaffold133964:≈230019)     | NO (1:21706486-21706494)  | NO (1:≈25718279)         | specific     |
| Locus3 (1:34121219-34126305)                                          | ePVCVL-OS3, ePVCVL-OS4                                        | YES (1:24847398-24850826)                                | NO (1:37035535-37039966)   | NO (Scaffold127363:20467-20936) | NO (1:≈32368856)          | NO (1:≈36538050)         | shared       |
| Locus4 (2:11304685-11314199)                                          | ePVCVL-OS5, ePVCVL-OS6, ePVCVL2-OS2, ePVCVL2-OS3, ePVCVL2-OS4 | NO (2:≈9990278)                                          | NO (2:≈10786295)           | NA                              | NO (2:≈12965281)          | NO (2:≈11085428)         | specific     |
| Locus5 (3:22472858-22478535)                                          | ePVCVL-OS7, ePVCVL-OS8, ePVCVL-OS9                            | NO (3:21127466-21144299)                                 | NO (3:24188491-24207759)   | NO (Scaffold133936:≈11952)      | NO (3:23820900-23831718)  | NO (3:≈24683602)         | specific     |
| Locus6 (4:23049961-23052909)                                          | ePVCVL-OS10, ePVCVL-OS11                                      | YES (4:15507736-15510963)                                | YES (4:20425145-20428093)  | YES(Scaffold136348:8367-11276)  | YES (by PCR)              | NO (4:20701665-20702064) | shared       |
| Locus7 (5:20224846-20231116)                                          | ePVCVL2-OS5                                                   | YES (5:15494086-15500612)                                | NO (5:20226666-20226726)   | NA                              | NO (5:≈17927496)          | NA                       | shared       |
| Locus8 (6:2756579-2756800)                                            | ePVCVL-OS12                                                   | NA                                                       | NA                         | NA                              | NA                        | NA                       | undetermined |
| Locus9 (7:11601272-11609584)                                          | ePVCVL-OS13, ePVCVL2-OS6, ePVCVL2-OS7                         | NO (7:≈9685762)                                          | NO (7:≈10281454)           | NO (Scaffold135424:≈13135)      | NA                        | NO (7:≈12715201)         | specific     |
| Locus10 (7:27571939-27575480)                                         | ePVCVL2-OS8                                                   | NO (7:19735543-19735565)                                 | NO (7:26263270-26263297)   | NO (Scaffold136766:46190-52571) | NO (7:24129203-24129252)  | NO (7:29102683-29102710) | specific     |
| Locus11 (8:25041604-25047553)                                         | ePVCVL-OS14, ePVCVL-OS15                                      | NO (8:18879456-18879465)                                 | NO (8:23608448-23608461)   | NO (Scaffold133581:28131-28144) | NO (8:19905457-19905466)  | NA                       | specific     |
| Locus12 (9:20408412-20408865)                                         | ePVCVL-OS16                                                   | NO (9:≈15164188)                                         | NO (9:≈20532533)           | NO (Scaffold127286:≈53721)      | NO (9:≈16147417)          | NO (9:≈23782384)         | specific     |
| Locus13 (9:20415024-20421219)                                         | ePVCVL-OS17                                                   | NO (9:≈15166306)                                         | NO (9:≈20549604)           | NO (Scaffold134818:≈47966)      | NO (9:≈16163653)          | NO (9:≈23789563)         | specific     |
| Locus14 (9:21423506-21432081)                                         | ePVCVL-OS18, ePVCVL-OS19, ePVCVL-OS20                         | NA                                                       | NO (9:≈21601883)           | NO (Scaffold136665:≈296524)     | NO (9:≈17419017)          | NA                       | undetermined |
| Locus15 (10:8405909-8410513)                                          | ePVCVL-OS21                                                   | NO (10:≈12586160)                                        | NO (10:7693053-7693094)    | NO (Scaffold134487:≈52955)      | NA                        | NA                       | specific     |
| Locus16 (11:8293415-8299957)                                          | ePVCVL-OS22                                                   | NO (11:≈6580050)                                         | NO (11:≈8208302)           | NA                              | NA                        | NA                       | specific     |
| Locus17 (11:11860427-11865464)                                        | ePVCVL2-OS9                                                   | YES (11:9219391-9224687)                                 | YES (11:11665031-11666533) | NO (Scaffold135116:≈8865)       | NO (11:≈12525767)         | NO (by PCR)              | shared       |
| Locus18 (11:19845104-19848248)                                        | ePVCVL2-OS10                                                  | NO (11:≈15223836)                                        | NO (11:≈19127289)          | NO (Scaffold138725:≈12970)      | NO (11:16885801-16885858) | NA                       | specific     |
| Locus19 (11:28541504-28591917)                                        | ePVCVL-OS23, ePVCVL-OS24                                      | NO (6:≈11963074)                                         | NA                         | NO (Scaffold127573:63004-63012) | NA                        | NO (7:≈12374530)         | specific     |
| Locus20 (12:19505111-19511369)                                        | ePVCVL2-OS11                                                  | NO (Oglab12_unplaced156:40610-41300)                     | NO (12:19470470-19470551)  | NO (Scaffold124318:≈104739)     | NO (12:≈13183476)         | NO (12:≈20578764)        | specific     |

<sup>a</sup>The segments close to each other (interval < 5kb) in the chromosomes are taken as a locus in the mapping analysis (locus positions are provided in the brackets).

<sup>b</sup>Names of the segments within a locus.

<sup>c</sup>Mapping results are of three kinds: YES, presence of a orthologous insertion at the corresponding locus (positions of orthologous insertions are shown in the brackets); NO, absence of a orthologous insertion at the corresponding locus (predicted position or range of empty sites are shown in the brackets); NA, not available due to a mass of uncharacterized bases (missing data), or a large deletion or rearrangement at the corresponding locus.
