# Supplementary material
Source: publisher figshare collection journal article supplement (https://plos.figshare.com/articles/dataset/_/5160220)
Supplement: Supplementary file 1 [file 1 › S5 Fig.pdf]

eRTBVL and eRTBVL2

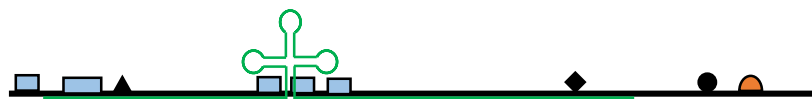

ePVCVL and ePVCVL2

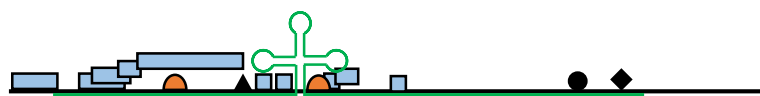

**S5 Fig. Predicted elements of noncoding regulatory sequences in IGRs.** The putative short ORF (blue box), stem-loop structure (green line), promoter (orange semi-circle), polyadenylation signal (black triangle), primer binding site (black circle), and polypurine tract (black diamond) in the IGR (black line) are shown for eRTBVL/eRTBVL2 and ePVCVL/ePVCVL2. Consensus sequences of eRTBVL-X, eRTBVL2, ePVCVL, and ePVCVL2 constructed from the *O. sativa* genome were used for predictions.
