# Supplementary material
Source: publisher figshare collection journal article supplement (https://plos.figshare.com/articles/dataset/_/5160220)
Supplement: Supplementary file 1 [file 1 › S5 Table.pdf]

**S5 Table. Mapping of ePVCVL and ePVCVL2 loci in the genomes of *O. glaberrima*, *O. glumaepatula*, *O. longistaminata*, *O. meridionalis* and *O. punctata* to the genome of *O. sativa*.**

| Genome                   | Information of ePVCVL and ePVCVL2 loci in the genomes |                                                                                                | Mapping into the <i>O. sativa</i> genome <sup>c</sup> | Remark       |
|--------------------------|-------------------------------------------------------|------------------------------------------------------------------------------------------------|-------------------------------------------------------|--------------|
|                          | Locus number (position) <sup>a</sup>                  | Segments <sup>b</sup>                                                                          |                                                       |              |
| <i>O. glaberrima</i>     | Locus1 (1:24847398-24850826)                          | ePVCVL-OG1, ePVCVL-OG2                                                                         | YES (1:34121219-34126305)                             | shared       |
|                          | Locus2 (4:15507736-15510963)                          | ePVCVL-OG3, ePVCVL-OG4, ePVCVL-OG5                                                             | YES (4:23049961-23052909)                             | shared       |
|                          | Locus3 (4:26253608-26265878)                          | ePVCVL-OG6, ePVCVL-OG7, ePVCVL2-OG1                                                            | NO (4:35405701-35405717)                              | specific     |
|                          | Locus4 (5:15494086-15500612)                          | ePVCVL2-OG2                                                                                    | YES (5:20224846-20231116)                             | shared       |
|                          | Locus5 (6:16933152-16940152)                          | ePVCVL-OG8                                                                                     | NO (6:22693382-22693889)                              | specific     |
|                          | Locus6 (7:7758503-7764924)                            | ePVCVL2-OG3                                                                                    | NO (7:9011784-9011913)                                | specific     |
|                          | Locus7 (9:16969612-16971982)                          | ePVCVL2-OG4, ePVCVL2-OG5                                                                       | NA                                                    | undetermined |
|                          | Locus8 (10:6511230-6516569)                           | ePVCVL-OG9                                                                                     | A(10:≈8419468)                                        | specific     |
|                          | Locus9 (10:8392335-8405594)                           | ePVCVL-OG10, ePVCVL-OG11, ePVCVL2-OG6                                                          | NO (10:10945698-10945702)                             | specific     |
|                          | Locus10 (11:6044654-6045997)                          | ePVCVL2-OG7                                                                                    | NO (11:7617002-7617023)                               | specific     |
|                          | Locus11 (11:6585334-6592706)                          | ePVCVL-OG12, ePVCVL2-OG8                                                                       | NO (11:≈8377686)                                      | specific     |
|                          | Locus12 (11:9219391-9224687)                          | ePVCVL2-OG9                                                                                    | YES (11:11860427-11865464)                            | shared       |
|                          | Locus13 (11:15893277-15899867)                        | ePVCVL-OG13, ePVCVL-OG14, ePVCVL-OG15, ePVCVL2-OG10, ePVCVL2-OG11                              | NO (11:20971323-20971750)                             | specific     |
|                          | Locus14 (12:13433323-13438696)                        | ePVCVL-OG16, ePVCVL-OG17, ePVCVL-OG18                                                          | NA                                                    | undetermined |
|                          | Locus15 (Oglab02_unplaced013:17967-22131)             | ePVCVL2-OG12, ePVCVL2-OG13                                                                     | NA                                                    | undetermined |
|                          | Locus16 (Oglab12_unplaced047:1-4574)                  | ePVCVL-OG19                                                                                    | NA                                                    | undetermined |
| <i>O. glumaepatula</i>   | Locus1 (1:25260891-25261149)                          | ePVCVL2-OU1                                                                                    | NO (1:23156362-23156379)                              | specific     |
|                          | Locus2 (3:4729510-4730602)                            | ePVCVL-OU1                                                                                     | NO (3:4680875-4688150)                                | specific     |
|                          | Locus3 (4:20425145-20428093)                          | ePVCVL-OU2, ePVCVL-OU3                                                                         | YES (4:23049961-23052909)                             | shared       |
|                          | Locus4 (6:25697867-25698260)                          | ePVCVL-OU4                                                                                     | NO (6:25598182-23052912)                              | specific     |
|                          | Locus5 (10:15995870-15996112)                         | ePVCVL2-OU2                                                                                    | NO (10:16866946-16867588)                             | specific     |
|                          | Locus6 (11:11665031-11665533)                         | ePVCVL2-OU3                                                                                    | YES (11:11860427-11865464)                            | shared       |
|                          | Locus7 (12:21618343-21619520)                         | ePVCVL-OU5                                                                                     | NA                                                    | undetermined |
|                          | Locus8 (12:21626409-21626532)                         | ePVCVL-OU6                                                                                     | NO (12:≈22229076)                                     | specific     |
| <i>O. longistaminata</i> | Locus1 (Scaffold122663:42094-42442)                   | ePVCVL-OL1                                                                                     | NO (11:≈18951159)                                     | specific     |
|                          | Locus2 (Scaffold136348:8367-11298)                    | ePVCVL-OL2, ePVCVL-OL3                                                                         | YES (4:23049961-23052931)                             | shared       |
|                          | Locus3 (Scaffold126431:170647-170724)                 | ePVCVL2-OL1                                                                                    | NO (3:≈26353077)                                      | specific     |
|                          | Locus4 (Scaffold136293:6407-6470)                     | ePVCVL2-OL2                                                                                    | NO (7:4570128-4570212)                                | specific     |
| <i>O. meridionalis</i>   | Locus1 (1:843164-844272)                              | ePVCVL-OM1                                                                                     | NO (1:≈1361354)                                       | specific     |
|                          | Locus2 (1:19176596-19176727)                          | ePVCVL-OM2                                                                                     | NO (1:20650545-20652372)                              | specific     |
|                          | Locus3 (2:19424534-19424933)                          | ePVCVL-OM3                                                                                     | NO (2:≈18184236)                                      | specific     |
|                          | Locus4 (3:2366827-2370890)                            | ePVCVL-OM4, ePVCVL-OM5                                                                         | NO (3:≈1981605)                                       | specific     |
|                          | Locus5 (4:23169068-23170204)                          | ePVCVL2-OM1                                                                                    | NO (4:≈28177610)                                      | specific     |
|                          | Locus6 (6:11359819-11361254)                          | ePVCVL2-OM2                                                                                    | NO (6:9374355-9374493)                                | specific     |
|                          | Locus7 (7:18949008-18949381)                          | ePVCVL2-OM3                                                                                    | NO (7:≈22528997)                                      | specific     |
|                          | Locus8 (8:5996654-5999649)                            | ePVCVL2-OM4, ePVCVL2-OM5                                                                       | NO (8:6195297-6195410)                                | specific     |
|                          | Locus9 (8:9583173-9583690)                            | ePVCVL2-OM6                                                                                    | NA                                                    | undetermined |
|                          | Locus10 (8:9592885-9593588)                           | ePVCVL-OM6                                                                                     | NA                                                    | undetermined |
|                          | Locus11 (8:10029035-10030167)                         | ePVCVL-OM7, ePVCVL2-OM7                                                                        | NO (8:≈13106697)                                      | specific     |
|                          | Locus12 (9:3194279-3194422)                           | ePVCVL-OM8                                                                                     | NO (9:≈4554048)                                       | specific     |
|                          | Locus13 (9:11798813-11799894)                         | ePVCVL2-OM8                                                                                    | NO (9:14820313-14820314)                              | specific     |
|                          | Locus14 (11:7758179-7759163)                          | ePVCVL2-OM9, ePVCVL2-OM10                                                                      | NO (11:≈13741299)                                     | specific     |
| <i>O. punctata</i>       | Locus1 (1:36462406-36468381)                          | ePVCVL2-OP1                                                                                    | NO (1:≈34032877)                                      | specific     |
|                          | Locus2 (2:18173741-18182535)                          | ePVCVL-OP1, ePVCVL-OP2, ePVCVL-OP3, ePVCVL-OP4, ePVCVL-OP5, ePVCVL-OP6, ePVCVL-OP7, ePVCVL-OP8 | NO (2:≈16229047)                                      | specific     |
|                          | Locus3 (3:1870791-1877899)                            | ePVCVL-OP9, ePVCVL-OP10                                                                        | NO (3:1950314-1952016)                                | specific     |
|                          | Locus4 (4:11089082-11094038)                          | ePVCVL-OP11                                                                                    | NA                                                    | undetermined |
|                          | Locus5 (7:14018987-14022570)                          | ePVCVL-OP12, ePVCVL-OP13, ePVCVL-OP14                                                          | NO (7:≈13073519)                                      | specific     |
|                          | Locus6 (7:14512232-14518685)                          | ePVCVL2-OP2                                                                                    | NO (7:≈13488047)                                      | specific     |
|                          | Locus7 (9:2488988-2494897)                            | ePVCVL-OP15                                                                                    | NA                                                    | undetermined |
|                          | Locus8 (9:2508244-2515543)                            | ePVCVL-OP16, ePVCVL-OP17, ePVCVL-OP18, ePVCVL-OP19, ePVCVL-OP20                                | NA                                                    | undetermined |
|                          | Locus9 (12:17239641-17250240)                         | ePVCVL-OP21, ePVCVL-OP22, ePVCVL-OP23, ePVCVL2-OP3, ePVCVL2-OP4                                | NO (12:≈19505111)                                     | specific     |

<sup>a</sup>The segments close to each other (interval < 5kb) in the chromosomes are taken as a locus in the mapping analysis (locus positions are provided in the brackets).

<sup>b</sup>Names of the segments within a locus.

<sup>c</sup>Mapping results are of three kinds: YES, presence of a orthologous insertion at the corresponding locus (positions of orthologous insertions are shown in the brackets); NO, absence of a orthologous insertion at the corresponding locus (predicted position or range of empty sites are shown in the brackets); NA, not available due to a mass of uncharacterized bases (missing data), or a large deletion or rearrangement at the corresponding locus.
