# Supplementary material
Source: publisher figshare collection journal article supplement (https://plos.figshare.com/articles/dataset/_/5160220)
Supplement: Supplementary file 1 [file 1 › S6 Fig.pdf]

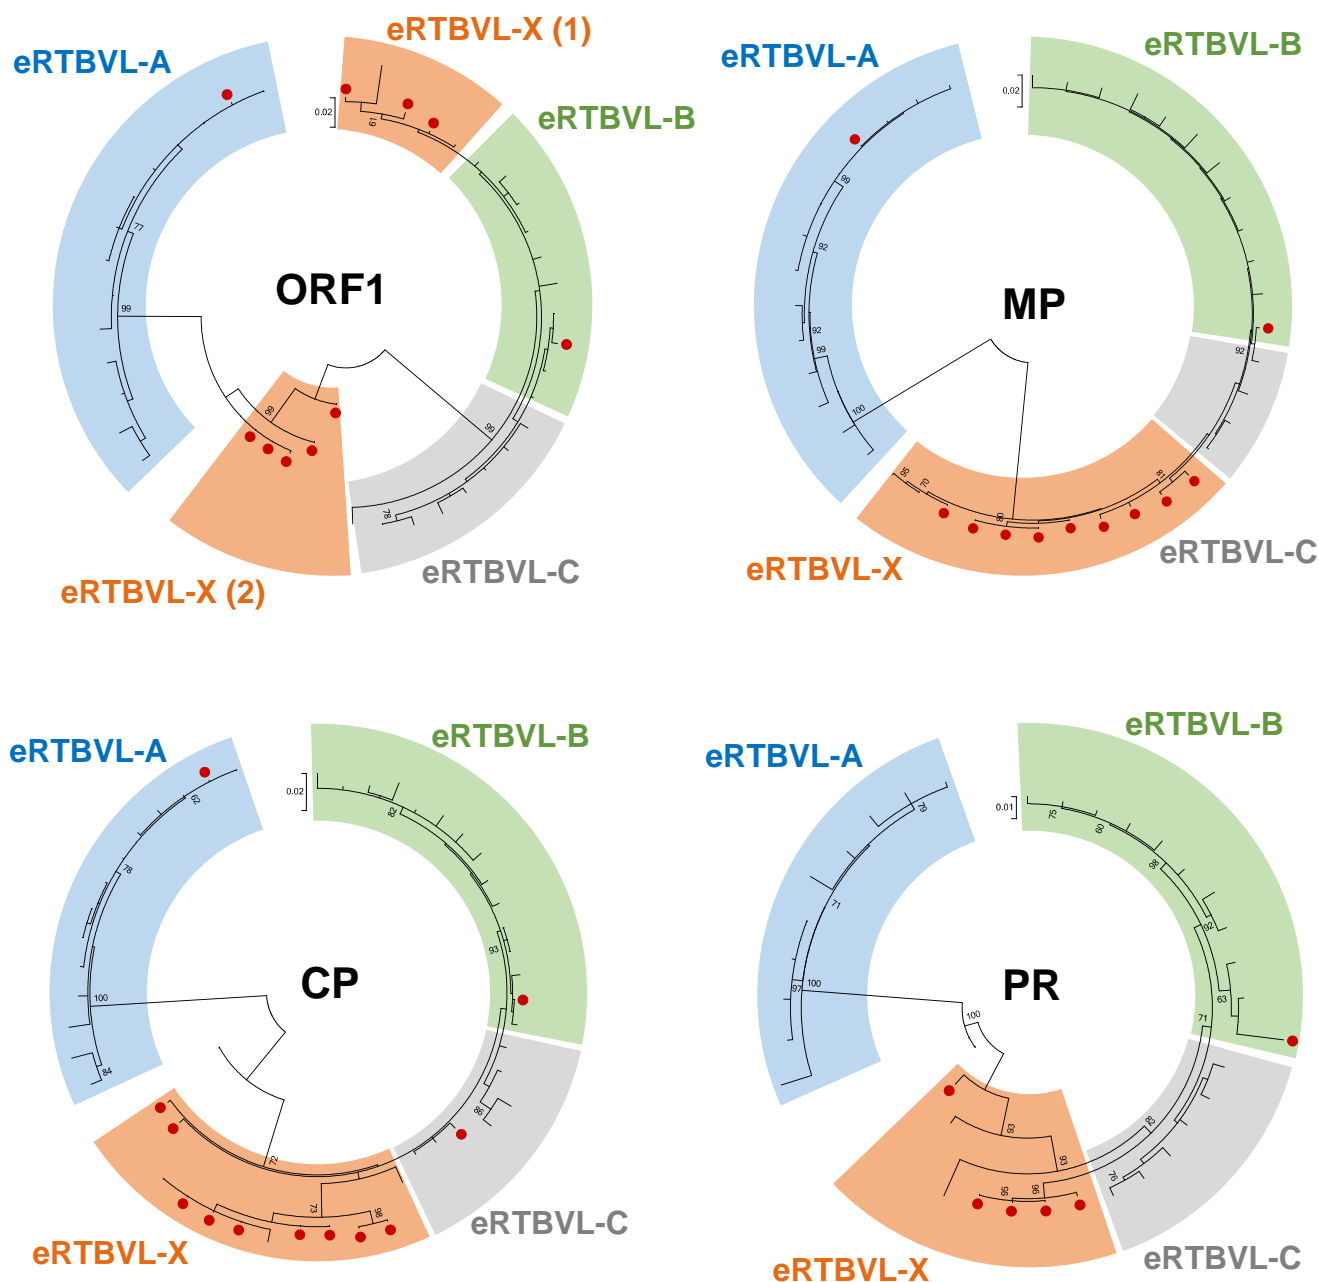

**S6 Fig. Phylogenetic relationships of other homologous regions between eRTBVL and eRTBVL2.** Maximum-likelihood (ML) trees were constructed based on ORF1, MP, CP, and PR domains (with alignment lengths of 438, 1407, 992, and 1260 nt, respectively). Bootstrap support values greater than 60% based on 1,000 replicates are shown above branches of each midpoint-rooted tree. Scale bars represent evolutionary distances in terms of substitutions per site. Sequences corresponding to different eRTBVL groups [30] are indicated by different background colors (topologies of the four phylogenetic trees show local variations due to the recombination between the viral lineages of eRTBVL groups previously reported [30]). Red circles indicate sequences corresponding to eRTBVL2.
