# Supplementary material
Source: publisher figshare collection journal article supplement (https://plos.figshare.com/articles/dataset/_/5160220)
Supplement: Supplementary file 1 [file 1 › S6 Table.pdf]

**S6 Table. Information on the primers used in this study.**

| Target                                | Primer name   | Primer sequence (from 5' to 3') | Remark  |
|---------------------------------------|---------------|---------------------------------|---------|
| Orthologous ePVCVL2-OS9               | eRPV1-st6-1b  | TGGTATGTGGCAATTGGATGG           | forward |
|                                       | eRPV1-st6-2   | TAAAGATCCTGTCATCCCCGA           | reverse |
|                                       | eRPV1-st6-2b  | ATTGCAAGGCAGCAAAAAGAT           | reverse |
|                                       | eRPV1-st6-3   | CCCTTTTGCTGTTCGTTGTTGGC         | forward |
|                                       | eRPV1-st6-4   | TGCTCACCTCCCCACCTCGC            | reverse |
| Orthologous ePVCVL-OS10 & ePVCVL-OS11 | eRPV2-st6-1a  | CCACTGGGTATCAGCGTTCAATC         | forward |
|                                       | eRPV2-st6-2   | CCTATATAAGGGGCTCAGGAACAC        | reverse |
|                                       | eRPV2-st6-M1  | TAGACTCTCACACTTAGACTTTC         | forward |
|                                       | eRPV2-st6-M2a | CGGTCTAGGTGTTCAATCATATAC        | reverse |
|                                       | eRPV2-st6-M2b | CTTGATAGGTTGAAGGTAGATCC         | reverse |
|                                       | eRPV2-st6-3   | GAAGACTTATGAAAGTCAAGTGTGAG      | forward |
|                                       | eRPV2-st6-4   | GCATATCTTGCAAGAAAATCGTAAGTC     | reverse |
| Orthologous ePVCVL2-OS5               | eRPV1-ga2-1   | TTGAGGGGCGATTCAATTAG            | forward |
|                                       | eRPV1-ga2-2   | GGCTCACCATCACACTTCGG            | reverse |
| Orthologous ePVCVL-OS3 & ePVCVL-OS4   | eRPV2-ga1-3   | CACTGGTTGTCTCCCATTCTATAG        | forward |
|                                       | eRPV2-ga1-4   | CGTTCGTTGCTGTAAATCAG            | reverse |
| Orthologous ePVCVL2-OS8               | eRPV1-st5-1   | GCAATTAGGCTCCACGAAGGATTTA       | forward |
|                                       | eRPV1-st5-4   | GTTGGCTCCTGGCCCTTCACAC          | reverse |
| Orthologous ePVCVL-OS2                | eRPV2-st2-1   | GAGAAATCGGAGTTCATCGTCT          | forward |
|                                       | eRPV2-st2-4   | CGTTTCCGTGTAAGGGCTAC            | reverse |
