# Supplementary material
Source: publisher figshare collection journal article supplement (https://plos.figshare.com/articles/dataset/_/5160220)
Supplement: Supplementary file 1 [file 1 › S7 Fig.pdf]

A

eRTBVL2-OS10

| Methods  | Breakpoint |       | Parent      |                    | Probability      |
|----------|------------|-------|-------------|--------------------|------------------|
|          | Left       | Right | Major       | Minor              |                  |
| RDP      | 6689       | 4044  | eRTBVL2-OS8 | eRTBVL-JaE9-1 (A2) | 3.77E-178        |
| GENECONV | 6689       | 4044  | eRTBVL2-OS8 | eRTBVL-JaE9-1 (A2) | 4.02E-169        |
| BootScan | 6689       | 4044  | eRTBVL2-OS8 | eRTBVL-JaE9-1 (A2) | <b>1.44E-181</b> |
| MaxChi   | 6689       | 4044  | eRTBVL2-OS8 | eRTBVL-JaE9-1 (A2) | 2.25E-60         |
| Chimaera | 6689       | 4044  | eRTBVL2-OS8 | eRTBVL-JaE9-1 (A2) | 6.38E-43         |
| SiScan   | 6689       | 4044  | eRTBVL2-OS8 | eRTBVL-JaE9-1 (A2) | 5.67E-99         |

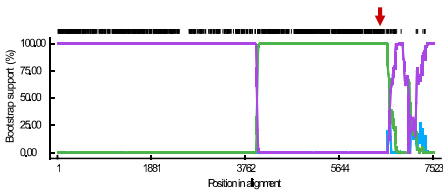

eRTBVL2-OS11

| Methods  | Breakpoint |       | Parent      |                    | Probability      |
|----------|------------|-------|-------------|--------------------|------------------|
|          | Left       | Right | Major       | Minor              |                  |
| RDP      | 6580       | 2081  | eRTBVL2-OS8 | eRTBVL-JaE7-7 (A1) | 1.23E-164        |
| GENECONV | 6580       | 2081  | eRTBVL2-OS8 | eRTBVL-JaE7-7 (A1) | <b>1.74E-166</b> |
| BootScan | 6580       | 2081  | eRTBVL2-OS8 | eRTBVL-JaE7-7 (A1) | 3.70E-159        |
| MaxChi   | 6590       | 2081  | eRTBVL2-OS8 | eRTBVL-JaE6-5 (A1) | 2.43E-42         |
| Chimaera | 6580       | 2081  | eRTBVL2-OS8 | eRTBVL-JaE7-7 (A1) | 1.36E-42         |
| SiScan   | 6580       | 2081  | eRTBVL2-OS8 | eRTBVL-JaE7-7 (A1) | 7.17E-71         |

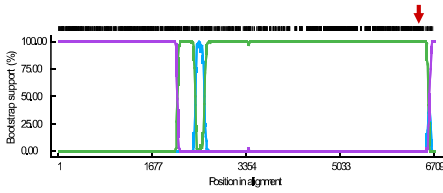

eRTBVL2-OS12

| Methods  | Breakpoint |       | Parent       |                    | Probability     |
|----------|------------|-------|--------------|--------------------|-----------------|
|          | Left       | Right | Major        | Minor              |                 |
| RDP      | 3366       | 992   | eRTBVL2-OS2  | eRTBVL-JaE12-9 (B) | 3.87E-26        |
| GENECONV | 3366       | 992   | eRTBVL2-OS2  | eRTBVL-JaE12-9 (B) | 1.82E-24        |
| BootScan | 3366       | 992   | eRTBVL2-OS2  | eRTBVL-JaE12-9 (B) | <b>2.67E-31</b> |
| MaxChi   | NS         | NS    | NS           | NS                 | NS              |
| Chimaera | 3540       | 938   | eRTBVL2-OS10 | eRTBVL-JaE12-9 (B) | 3.58E-21        |
| SiScan   | NS         | NS    | NS           | NS                 | NS              |

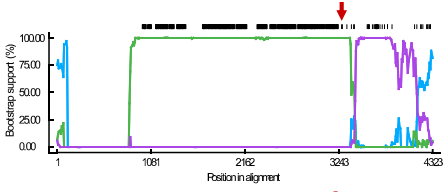

eRTBVL2-OS2

| Methods  | Breakpoint |       | Parent      |                    | Probability     |
|----------|------------|-------|-------------|--------------------|-----------------|
|          | Left       | Right | Major       | Minor              |                 |
| RDP      | 2442       | 3282  | eRTBVL2-OS9 | eRTBVL-JaE8-11 (X) | 1.74E-08        |
| GENECONV | NS         | NS    | NS          | NS                 | NS              |
| BootScan | 2442       | 2785  | eRTBVL2-OS9 | eRTBVL-JaE8-8 (X)  | <b>1.37E-09</b> |
| MaxChi   | 2442       | 3282  | eRTBVL2-OS9 | eRTBVL-JaE8-11 (X) | 1.03E-05        |
| Chimaera | NS         | NS    | NS          | NS                 | NS              |
| SiScan   | NS         | NS    | NS          | NS                 | NS              |

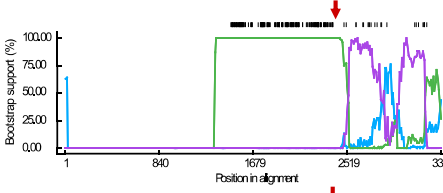

eRTBVL2-OS3

| Methods  | Breakpoint |       | Parent      |                    | Probability     |
|----------|------------|-------|-------------|--------------------|-----------------|
|          | Left       | Right | Major       | Minor              |                 |
| RDP      | NS         | NS    | NS          | NS                 | NS              |
| GENECONV | 2346       | 3282  | eRTBVL2-OS9 | eRTBVL-JaE8-11 (X) | 6.70E-17        |
| BootScan | 2346       | 3282  | eRTBVL2-OS9 | eRTBVL-JaE8-11 (X) | <b>6.08E-18</b> |
| MaxChi   | 2346       | 3282  | eRTBVL2-OS9 | eRTBVL-JaE8-11 (X) | 3.02E-08        |
| Chimaera | 2346       | 3282  | eRTBVL2-OS9 | eRTBVL-JaE8-11 (X) | 4.80E-07        |
| SiScan   | NS         | NS    | NS          | NS                 | NS              |

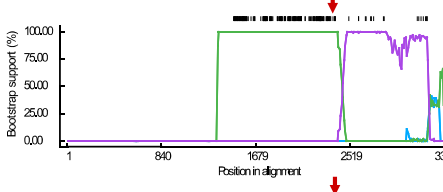

eRTBVL2-OS4

| Methods  | Breakpoint |       | Parent      |                    | Probability     |
|----------|------------|-------|-------------|--------------------|-----------------|
|          | Left       | Right | Major       | Minor              |                 |
| RDP      | 2452       | 3306  | eRTBVL2-OS9 | eRTBVL-JaE8-8 (X)  | 1.77E-11        |
| GENECONV | 2442       | 2949  | eRTBVL2-OS2 | eRTBVL-JaE8-11 (X) | 1.55E-06        |
| BootScan | 2452       | 3247  | eRTBVL2-OS9 | eRTBVL-JaE8-8 (X)  | <b>1.58E-11</b> |
| MaxChi   | 2442       | 3282  | eRTBVL2-OS9 | eRTBVL-JaE8-11 (X) | 3.29E-05        |
| Chimaera | 2452       | 3247  | eRTBVL2-OS9 | eRTBVL-JaE8-8 (X)  | 2.03E-03        |
| SiScan   | NS         | NS    | NS          | NS                 | NS              |

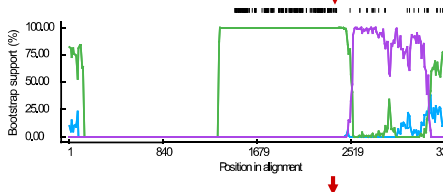

eRTBVL2-OS6

| Methods  | Breakpoint |       | Parent      |                    | Probability     |
|----------|------------|-------|-------------|--------------------|-----------------|
|          | Left       | Right | Major       | Minor              |                 |
| RDP      | 2356       | 3207  | eRTBVL2-OS2 | eRTBVL-JaE8-11 (X) | <b>2.35E-11</b> |
| GENECONV | 2360       | 2716  | eRTBVL2-OS9 | eRTBVL-JaE8-11 (X) | 2.71E-08        |
| BootScan | 2360       | 3129  | eRTBVL2-OS9 | eRTBVL-JaE8-11 (X) | 3.33E-10        |
| MaxChi   | NS         | NS    | NS          | NS                 | NS              |
| Chimaera | NS         | NS    | NS          | NS                 | NS              |
| SiScan   | NS         | NS    | NS          | NS                 | NS              |

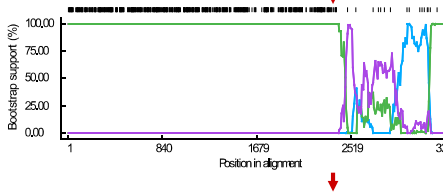

eRTBVL2-OS7

| Methods  | Breakpoint |       | Parent      |                    | Probability     |
|----------|------------|-------|-------------|--------------------|-----------------|
|          | Left       | Right | Major       | Minor              |                 |
| RDP      | 2356       | 3004  | eRTBVL2-OS2 | eRTBVL-JaE8-11 (X) | <b>4.79E-15</b> |
| GENECONV | 2360       | 3129  | eRTBVL2-OS9 | eRTBVL-JaE8-11 (X) | 4.06E-12        |
| BootScan | 2360       | 3129  | eRTBVL2-OS9 | eRTBVL-JaE8-11 (X) | 1.27E-13        |
| MaxChi   | 2283       | 3129  | eRTBVL2-OS9 | eRTBVL-JaE8-11 (X) | 2.24E-03        |
| Chimaera | NS         | NS    | NS          | NS                 | NS              |
| SiScan   | NS         | NS    | NS          | NS                 | NS              |

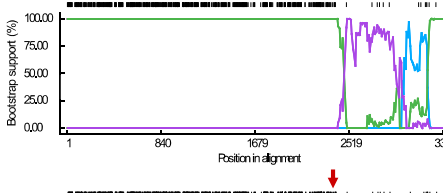

eRTBVL2-OS8

| Methods  | Breakpoint |       | Parent      |                    | Probability     |
|----------|------------|-------|-------------|--------------------|-----------------|
|          | Left       | Right | Major       | Minor              |                 |
| RDP      | 2356       | 2966  | eRTBVL2-OS2 | eRTBVL-JaE8-11 (X) | <b>4.56E-15</b> |
| GENECONV | 2360       | 3167  | eRTBVL2-OS9 | eRTBVL-JaE8-11 (X) | 1.28E-09        |
| BootScan | 2360       | 3167  | eRTBVL2-OS9 | eRTBVL-JaE8-11 (X) | 1.59E-14        |
| MaxChi   | NS         | NS    | NS          | NS                 | NS              |
| Chimaera | NS         | NS    | NS          | NS                 | NS              |
| SiScan   | 2360       | 3167  | eRTBVL2-OS9 | eRTBVL-JaE8-11 (X) | 1.59E-14        |

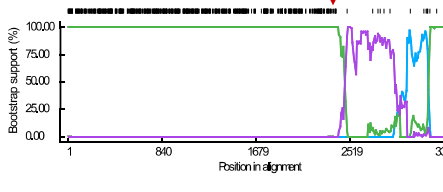

B

ePVCVL-OS2

| Methods  | Breakpoint |       | Parent      |              | Probability     |
|----------|------------|-------|-------------|--------------|-----------------|
|          | Left       | Right | Major       | Minor        |                 |
| RDP      | 738        | 1276  | ePVCVL-OS18 | ePVCVL2-OS11 | 3.63E-13        |
| GENECONV | 745        | 1276  | ePVCVL-OS18 | ePVCVL2-OS11 | 9.35E-10        |
| BootScan | 726        | 1276  | Unknown     | ePVCVL2-OS11 | <b>9.23E-16</b> |
| MaxChi   | NS         | NS    | NS          | NS           | NS              |
| Chimaera | 738        | 1410  | ePVCVL-OS18 | ePVCVL2-OS8  | 4.90E-03        |
| SiScan   | 738        | 1276  | ePVCVL-OS18 | ePVCVL2-OS11 | 9.42E-09        |

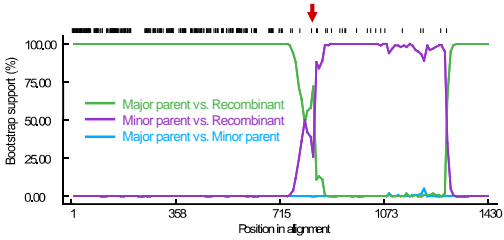

ePVCVL-OS8

| Methods  | Breakpoint |       | Parent      |              | Probability     |
|----------|------------|-------|-------------|--------------|-----------------|
|          | Left       | Right | Major       | Minor        |                 |
| RDP      | 738        | 1314  | ePVCVL-OS18 | ePVCVL2-OS11 | 1.56E-13        |
| GENECONV | 738        | 1314  | ePVCVL-OS18 | ePVCVL2-OS11 | 4.65E-11        |
| BootScan | 726        | 1348  | Unknown     | ePVCVL2-OS11 | <b>7.26E-16</b> |
| MaxChi   | NS         | NS    | NS          | NS           | NS              |
| Chimaera | 738        | 1368  | ePVCVL-OS18 | ePVCVL2-OS8  | 1.35E-03        |
| SiScan   | 738        | 1314  | ePVCVL-OS18 | ePVCVL2-OS11 | 2.70E-09        |

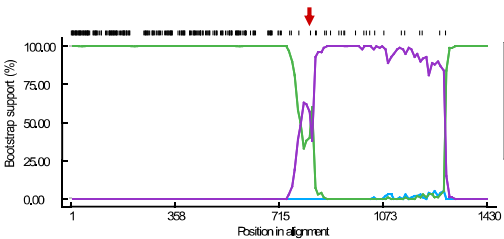

ePVCVL-OS21

| Methods  | Breakpoint |       | Parent      |              | Probability     |
|----------|------------|-------|-------------|--------------|-----------------|
|          | Left       | Right | Major       | Minor        |                 |
| RDP      | 738        | 1070  | ePVCVL-OS18 | ePVCVL2-OS11 | <b>1.28E-08</b> |
| GENECONV | 745        | 943   | ePVCVL-OS18 | ePVCVL2-OS11 | 9.58E-08        |
| BootScan | 726        | 1010  | Unknown     | ePVCVL2-OS11 | 2.83E-06        |
| MaxChi   | NS         | NS    | NS          | NS           | NS              |
| Chimaera | 800        | 1375  | ePVCVL-OS5  | ePVCVL2-OS8  | 2.18E-04        |
| SiScan   | 738        | 1070  | ePVCVL-OS18 | ePVCVL2-OS11 | 1.62E-07        |

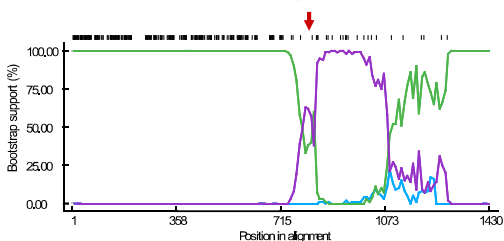

ePVCVL2-OS5

| Methods  | Breakpoint |       | Parent  |            | Probability     |
|----------|------------|-------|---------|------------|-----------------|
|          | Left       | Right | Major   | Minor      |                 |
| RDP      | 739        | 1290  | Unknown | ePVCVL-OS8 | 2.23E-09        |
| GENECONV | 787        | 1000  | Unknown | ePVCVL-OS8 | 6.16E-07        |
| BootScan | 787        | 1396  | Unknown | ePVCVL-OS8 | <b>7.97E-11</b> |
| MaxChi   | NS         | NS    | NS      | NS         | NS              |
| Chimaera | NS         | NS    | NS      | NS         | NS              |
| SiScan   | NS         | NS    | NS      | NS         | NS              |

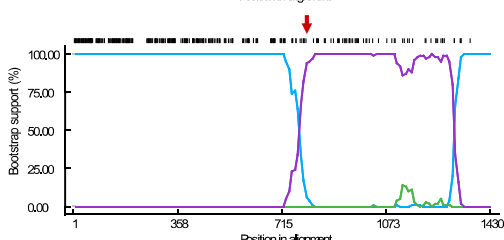

ePVCVL2-OS8

| Methods  | Breakpoint |       | Parent  |            | Probability     |
|----------|------------|-------|---------|------------|-----------------|
|          | Left       | Right | Major   | Minor      |                 |
| RDP      | 735        | 1429  | Unknown | ePVCVL-OS8 | 3.40E-18        |
| GENECONV | 764        | 1429  | Unknown | ePVCVL-OS8 | 9.18E-15        |
| BootScan | 764        | 1429  | Unknown | ePVCVL-OS8 | <b>1.09E-18</b> |
| MaxChi   | NS         | NS    | NS      | NS         | NS              |
| Chimaera | NS         | NS    | NS      | NS         | NS              |
| SiScan   | NS         | NS    | NS      | NS         | NS              |

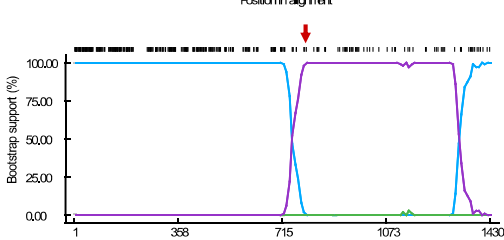

ePVCVL2-OS10

| Methods  | Breakpoint |       | Parent  |            | Probability     |
|----------|------------|-------|---------|------------|-----------------|
|          | Left       | Right | Major   | Minor      |                 |
| RDP      | 701        | 1167  | Unknown | ePVCVL-OS8 | 7.73E-14        |
| GENECONV | 723        | 1388  | Unknown | ePVCVL-OS8 | 5.17E-10        |
| BootScan | 725        | 1341  | Unknown | ePVCVL-OS8 | <b>1.51E-14</b> |
| MaxChi   | NS         | NS    | NS      | NS         | NS              |
| Chimaera | NS         | NS    | NS      | NS         | NS              |
| SiScan   | NS         | NS    | NS      | NS         | NS              |

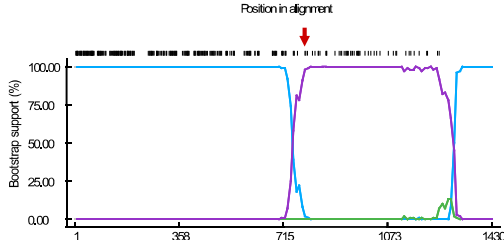

ePVCVL2-OS11

| Methods  | Breakpoint |       | Parent      |            | Probability     |
|----------|------------|-------|-------------|------------|-----------------|
|          | Left       | Right | Major       | Minor      |                 |
| RDP      | 722        | 1346  | Unknown     | ePVCVL-OS8 | 1.20E-21        |
| GENECONV | 722        | 1346  | Unknown     | ePVCVL-OS8 | 6.45E-23        |
| BootScan | 722        | 1346  | Unknown     | ePVCVL-OS8 | <b>2.90E-23</b> |
| MaxChi   | NS         | NS    | NS          | NS         | NS              |
| Chimaera | 726        | 1340  | ePVCVL2-OS5 | ePVCVL-OS2 | 7.58E-06        |
| SiScan   | NS         | NS    | NS          | NS         | NS              |

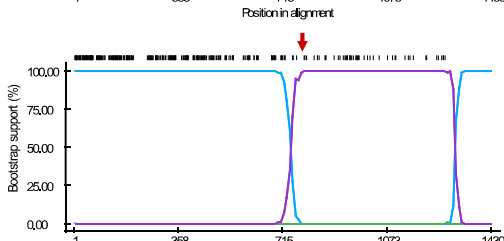

C

ePVCVL-OG6

| Methods  | Breakpoint |       | Parent  |              | Probability     |
|----------|------------|-------|---------|--------------|-----------------|
|          | Left       | Right | Major   | Minor        |                 |
| RDP      | 665        | 1193  | Unknown | ePVCVL2-OG12 | 2.03E-05        |
| GENECONV | NS         | NS    | NS      | NS           | NS              |
| BootScan | 692        | 1193  | Unknown | ePVCVL2-OG12 | 3.95E-05        |
| MaxChi   | 546        | 1194  | Unknown | ePVCVL2-OG3  | <b>1.27E-06</b> |
| Chimera  | 577        | 1194  | Unknown | ePVCVL2-OG12 | 9.64E-04        |
| SiScan   | NS         | NS    | NS      | NS           | NS              |

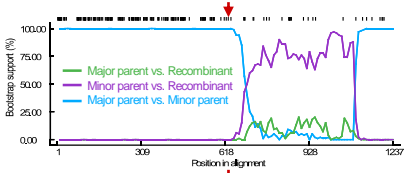

ePVCVL-OG8

| Methods  | Breakpoint |       | Parent      |              | Probability     |
|----------|------------|-------|-------------|--------------|-----------------|
|          | Left       | Right | Major       | Minor        |                 |
| RDP      | 577        | 1214  | Unknown     | ePVCVL2-OG12 | <b>1.57E-10</b> |
| GENECONV | 623        | 1082  | ePVCVL-OG11 | ePVCVL2-OG12 | 1.01E-06        |
| BootScan | 577        | 1214  | Unknown     | ePVCVL2-OG12 | 1.05E-09        |
| MaxChi   | 577        | 1198  | Unknown     | ePVCVL2-OG3  | 1.06E-07        |
| Chimera  | 577        | 1214  | Unknown     | ePVCVL2-OG12 | 2.32E-06        |
| SiScan   | 768        | 1218  | ePVCVL-OG18 | ePVCVL2-OG12 | 7.33E-03        |

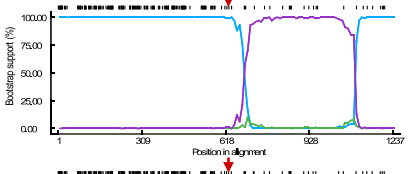

ePVCVL-OG9

| Methods  | Breakpoint |       | Parent  |              | Probability     |
|----------|------------|-------|---------|--------------|-----------------|
|          | Left       | Right | Major   | Minor        |                 |
| RDP      | 620        | 1193  | Unknown | ePVCVL2-OG12 | <b>3.82E-07</b> |
| GENECONV | NS         | NS    | NS      | NS           | NS              |
| BootScan | 692        | 1193  | Unknown | ePVCVL2-OG12 | 9.89E-06        |
| MaxChi   | NS         | NS    | NS      | NS           | NS              |
| Chimera  | 577        | 1215  | Unknown | ePVCVL2-OG12 | 1.40E-04        |
| SiScan   | NS         | NS    | NS      | NS           | NS              |

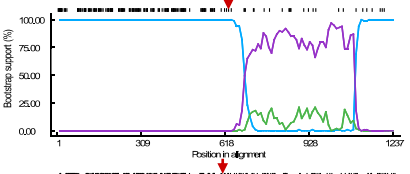

ePVCVL2-OG1

| Methods  | Breakpoint |       | Parent  |            | Probability     |
|----------|------------|-------|---------|------------|-----------------|
|          | Left       | Right | Major   | Minor      |                 |
| RDP      | 616        | 1338  | Unknown | ePVCVL-OG8 | 2.62E-07        |
| GENECONV | NS         | NS    | NS      | NS         | NS              |
| BootScan | 616        | 1338  | Unknown | ePVCVL-OG8 | <b>3.19E-18</b> |
| MaxChi   | NS         | NS    | NS      | NS         | NS              |
| Chimera  | 616        | 1338  | Unknown | ePVCVL-OG8 | 6.25E-14        |
| SiScan   | NS         | NS    | NS      | NS         | NS              |

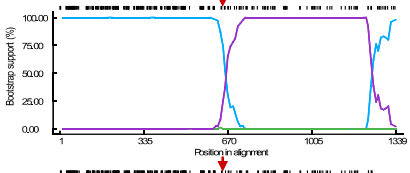

ePVCVL2-OG2

| Methods  | Breakpoint |       | Parent  |            | Probability     |
|----------|------------|-------|---------|------------|-----------------|
|          | Left       | Right | Major   | Minor      |                 |
| RDP      | 616        | 1291  | Unknown | ePVCVL-OG8 | 2.97E-19        |
| GENECONV | NS         | NS    | NS      | NS         | NS              |
| BootScan | 616        | 1291  | Unknown | ePVCVL-OG8 | <b>2.57E-19</b> |
| MaxChi   | NS         | NS    | NS      | NS         | NS              |
| Chimera  | 616        | 1291  | Unknown | ePVCVL-OG8 | 7.82E-13        |
| SiScan   | NS         | NS    | NS      | NS         | NS              |

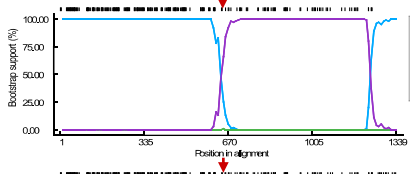

ePVCVL2-OG3

| Methods  | Breakpoint |       | Parent  |            | Probability     |
|----------|------------|-------|---------|------------|-----------------|
|          | Left       | Right | Major   | Minor      |                 |
| RDP      | 616        | 1338  | Unknown | ePVCVL-OG8 | <b>3.66E-18</b> |
| GENECONV | NS         | NS    | NS      | NS         | NS              |
| BootScan | 616        | 1338  | Unknown | ePVCVL-OG8 | 6.39E-18        |
| MaxChi   | NS         | NS    | NS      | NS         | NS              |
| Chimera  | 616        | 1338  | Unknown | ePVCVL-OG8 | 3.77E-13        |
| SiScan   | NS         | NS    | NS      | NS         | NS              |

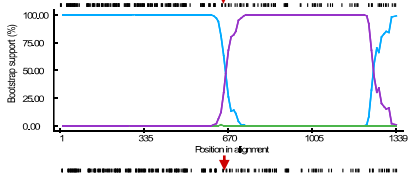

ePVCVL2-OG8

| Methods  | Breakpoint |       | Parent  |            | Probability     |
|----------|------------|-------|---------|------------|-----------------|
|          | Left       | Right | Major   | Minor      |                 |
| RDP      | 616        | 1338  | Unknown | ePVCVL-OG8 | 1.84E-18        |
| GENECONV | NS         | NS    | NS      | NS         | NS              |
| BootScan | 616        | 1338  | Unknown | ePVCVL-OG8 | <b>1.11E-18</b> |
| MaxChi   | NS         | NS    | NS      | NS         | NS              |
| Chimera  | 616        | 1338  | Unknown | ePVCVL-OG8 | 2.35E-13        |
| SiScan   | NS         | NS    | NS      | NS         | NS              |

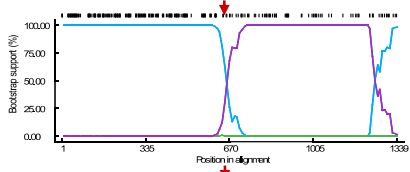

ePVCVL2-OG12

| Methods  | Breakpoint |       | Parent      |            | Probability     |
|----------|------------|-------|-------------|------------|-----------------|
|          | Left       | Right | Major       | Minor      |                 |
| RDP      | 616        | 1339  | Unknown     | ePVCVL-OG8 | <b>6.87E-23</b> |
| GENECONV | NS         | NS    | NS          | NS         | NS              |
| BootScan | 616        | 1339  | Unknown     | ePVCVL-OG8 | 4.05E-22        |
| MaxChi   | 650        | 1284  | ePVCVL2-OG3 | ePVCVL-OG8 | 6.23E-04        |
| Chimera  | 616        | 1339  | Unknown     | ePVCVL-OG8 | 3.50E-14        |
| SiScan   | NS         | NS    | NS          | NS         | NS              |

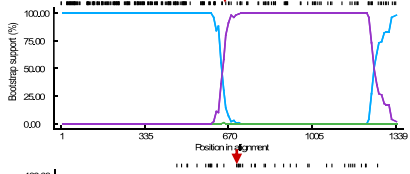

ePVCVL-OP16

| Methods  | Breakpoint |       | Parent      |         | Probability     |
|----------|------------|-------|-------------|---------|-----------------|
|          | Left       | Right | Major       | Minor   |                 |
| RDP      | NS         | NS    | NS          | NS      | NS              |
| GENECONV | 1118       | 1335  | ePVCVL-OP15 | Unknown | 1.53E-03        |
| BootScan | 1118       | 1335  | ePVCVL-OP15 | Unknown | <b>4.06E-04</b> |
| MaxChi   | NS         | NS    | NS          | NS      | NS              |
| Chimera  | NS         | NS    | NS          | NS      | NS              |
| SiScan   | 1118       | 1335  | ePVCVL-OP15 | Unknown | 4.23E-03        |

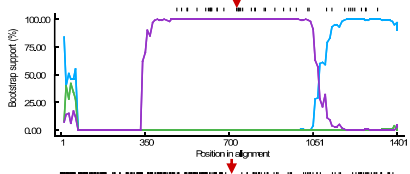

ePVCVL2-OP1

| Methods  | Breakpoint |       | Parent      |             | Probability     |
|----------|------------|-------|-------------|-------------|-----------------|
|          | Left       | Right | Major       | Minor       |                 |
| RDP      | 726        | 1388  | ePVCVL2-OP2 | ePVCVL-OP13 | 4.48E-10        |
| GENECONV | NS         | NS    | NS          | NS          | NS              |
| BootScan | 726        | 1388  | ePVCVL2-OP2 | ePVCVL-OP13 | 2.55E-09        |
| MaxChi   | 673        | 1388  | ePVCVL2-OP2 | ePVCVL-OP21 | <b>1.25E-11</b> |
| Chimera  | 726        | 1388  | ePVCVL2-OP2 | ePVCVL-OP13 | 3.50E-09        |
| SiScan   | NS         | NS    | NS          | NS          | NS              |

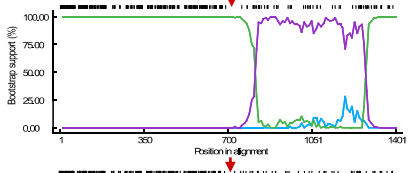

ePVCVL2-OP4

| Methods  | Breakpoint |       | Parent      |             | Probability     |
|----------|------------|-------|-------------|-------------|-----------------|
|          | Left       | Right | Major       | Minor       |                 |
| RDP      | 714        | 1386  | ePVCVL2-OP2 | ePVCVL-OP9  | <b>1.33E-13</b> |
| GENECONV | 1247       | 1386  | ePVCVL2-OP2 | ePVCVL-OP9  | 1.96E-08        |
| BootScan | 1021       | 1386  | ePVCVL2-OP2 | ePVCVL-OP13 | 2.27E-03        |
| MaxChi   | 714        | 1386  | ePVCVL2-OP2 | ePVCVL-OP9  | 2.27E-10        |
| Chimera  | 753        | 1386  | Unknown     | ePVCVL-OP9  | 2.64E-09        |
| SiScan   | 1072       | 1386  | ePVCVL2-OP2 | ePVCVL-OP9  | 4.15E-06        |

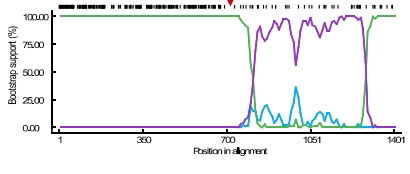

D

## ePVCVL-SB1

| Methods  | Breakpoint |       | Parent     |             | Probability     |
|----------|------------|-------|------------|-------------|-----------------|
|          | Left       | Right | Major      | Minor       |                 |
| RD       | 675        | 1321  | ePVCVL-SB3 | ePVCVL2-SB6 | 1.35E-08        |
| GENECONV | NS         | NS    | NS         | NS          | NS              |
| BootScan | NS         | NS    | NS         | NS          | NS              |
| MaxChi   | 656        | 1268  | Unknown    | ePVCVL2-SB6 | 2.70E-09        |
| Chimaera | 665        | 1414  | ePVCVL-SB3 | ePVCVL2-SB6 | <b>5.39E-10</b> |
| SiScan   | NS         | NS    | NS         | NS          | NS              |

## ePVCVL-SB6

| Methods  | Breakpoint |       | Parent     |             | Probability     |
|----------|------------|-------|------------|-------------|-----------------|
|          | Left       | Right | Major      | Minor       |                 |
| RD       | 675        | 1264  | ePVCVL-SB3 | ePVCVL2-SB6 | <b>2.44E-10</b> |
| GENECONV | NS         | NS    | NS         | NS          | NS              |
| BootScan | NS         | NS    | NS         | NS          | NS              |
| MaxChi   | 665        | 1234  | Unknown    | ePVCVL2-SB6 | 3.83E-08        |
| Chimaera | 666        | 1398  | ePVCVL-SB3 | ePVCVL2-SB6 | 6.67E-04        |
| SiScan   | NS         | NS    | NS         | NS          | NS              |

## ePVCVL-SB7

| Methods  | Breakpoint |       | Parent     |             | Probability     |
|----------|------------|-------|------------|-------------|-----------------|
|          | Left       | Right | Major      | Minor       |                 |
| RD       | 675        | 1276  | ePVCVL-SB3 | ePVCVL2-SB6 | 4.93E-11        |
| GENECONV | NS         | NS    | NS         | NS          | NS              |
| BootScan | NS         | NS    | NS         | NS          | NS              |
| MaxChi   | 656        | 1244  | Unknown    | ePVCVL2-SB6 | 3.38E-09        |
| Chimaera | 665        | 1414  | ePVCVL-SB3 | ePVCVL2-SB6 | <b>4.53E-11</b> |
| SiScan   | NS         | NS    | NS         | NS          | NS              |

## ePVCVL-SB10

| Methods  | Breakpoint |       | Parent     |             | Probability     |
|----------|------------|-------|------------|-------------|-----------------|
|          | Left       | Right | Major      | Minor       |                 |
| RD       | 665        | 1286  | ePVCVL-SB3 | ePVCVL2-SB6 | <b>7.81E-12</b> |
| GENECONV | NS         | NS    | NS         | NS          | NS              |
| BootScan | NS         | NS    | NS         | NS          | NS              |
| MaxChi   | 660        | 1244  | Unknown    | ePVCVL2-SB6 | 1.28E-09        |
| Chimaera | 665        | 1428  | ePVCVL-SB3 | ePVCVL2-SB6 | 4.48E-11        |
| SiScan   | NS         | NS    | NS         | NS          | NS              |

## ePVCVL-SB13

| Methods  | Breakpoint |       | Parent     |             | Probability     |
|----------|------------|-------|------------|-------------|-----------------|
|          | Left       | Right | Major      | Minor       |                 |
| RD       | 675        | 1348  | ePVCVL-SB3 | ePVCVL2-SB6 | <b>6.30E-10</b> |
| GENECONV | NS         | NS    | NS         | NS          | NS              |
| BootScan | NS         | NS    | NS         | NS          | NS              |
| MaxChi   | 651        | 1260  | Unknown    | ePVCVL2-SB6 | 6.36E-09        |
| Chimaera | 666        | 1402  | ePVCVL-SB3 | ePVCVL2-SB6 | 1.23E-04        |
| SiScan   | NS         | NS    | NS         | NS          | NS              |

## ePVCVL-SB17

| Methods  | Breakpoint |       | Parent     |             | Probability     |
|----------|------------|-------|------------|-------------|-----------------|
|          | Left       | Right | Major      | Minor       |                 |
| RD       | 729        | 1274  | ePVCVL-SB3 | ePVCVL2-SB6 | 2.20E-11        |
| GENECONV | NS         | NS    | NS         | NS          | NS              |
| BootScan | NS         | NS    | NS         | NS          | NS              |
| MaxChi   | 656        | 1241  | Unknown    | ePVCVL2-SB6 | 5.21E-09        |
| Chimaera | 665        | 1414  | ePVCVL-SB3 | ePVCVL2-SB6 | <b>1.10E-11</b> |
| SiScan   | NS         | NS    | NS         | NS          | NS              |

## ePVCVL-SB19

| Methods  | Breakpoint |       | Parent     |             | Probability     |
|----------|------------|-------|------------|-------------|-----------------|
|          | Left       | Right | Major      | Minor       |                 |
| RD       | 675        | 1339  | ePVCVL-SB3 | ePVCVL2-SB6 | <b>1.01E-10</b> |
| GENECONV | NS         | NS    | NS         | NS          | NS              |
| BootScan | NS         | NS    | NS         | NS          | NS              |
| MaxChi   | 656        | 1259  | Unknown    | ePVCVL2-SB6 | 2.18E-09        |
| Chimaera | 666        | 1398  | ePVCVL-SB3 | ePVCVL2-SB6 | 6.90E-04        |
| SiScan   | NS         | NS    | NS         | NS          | NS              |

## ePVCVL-SB20

| Methods  | Breakpoint |       | Parent     |             | Probability     |
|----------|------------|-------|------------|-------------|-----------------|
|          | Left       | Right | Major      | Minor       |                 |
| RD       | 675        | 1347  | ePVCVL-SB3 | ePVCVL2-SB6 | <b>1.92E-10</b> |
| GENECONV | NS         | NS    | NS         | NS          | NS              |
| BootScan | NS         | NS    | NS         | NS          | NS              |
| MaxChi   | 656        | 1260  | Unknown    | ePVCVL2-SB6 | 5.25E-09        |
| Chimaera | 665        | 1414  | ePVCVL-SB3 | ePVCVL2-SB6 | 1.13E-09        |
| SiScan   | NS         | NS    | NS         | NS          | NS              |

## ePVCVL2-SB1

| Methods  | Breakpoint |       | Parent  |             | Probability     |
|----------|------------|-------|---------|-------------|-----------------|
|          | Left       | Right | Major   | Minor       |                 |
| RD       | 672        | 1446  | Unknown | ePVCVL-SB1  | <b>1.23E-22</b> |
| GENECONV | 672        | 1267  | Unknown | ePVCVL-SB10 | 2.35E-22        |
| BootScan | 672        | 1425  | Unknown | ePVCVL-SB10 | 2.15E-20        |
| MaxChi   | 672        | 1267  | Unknown | ePVCVL-SB1  | 6.24E-14        |
| Chimaera | 672        | 1446  | Unknown | ePVCVL-SB1  | 7.47E-15        |
| SiScan   | 672        | 1438  | Unknown | ePVCVL-SB6  | 8.09E-19        |

## ePVCVL2-SB4

| Methods  | Breakpoint |       | Parent  |             | Probability     |
|----------|------------|-------|---------|-------------|-----------------|
|          | Left       | Right | Major   | Minor       |                 |
| RD       | NS         | NS    | NS      | NS          | NS              |
| GENECONV | 850        | 1218  | Unknown | ePVCVL-SB10 | 3.99E-06        |
| BootScan | 850        | 1218  | Unknown | ePVCVL-SB17 | <b>2.04E-10</b> |
| MaxChi   | NS         | NS    | NS      | NS          | NS              |
| Chimaera | NS         | NS    | NS      | NS          | NS              |
| SiScan   | 850        | 1218  | Unknown | ePVCVL-SB10 | 1.40E-05        |

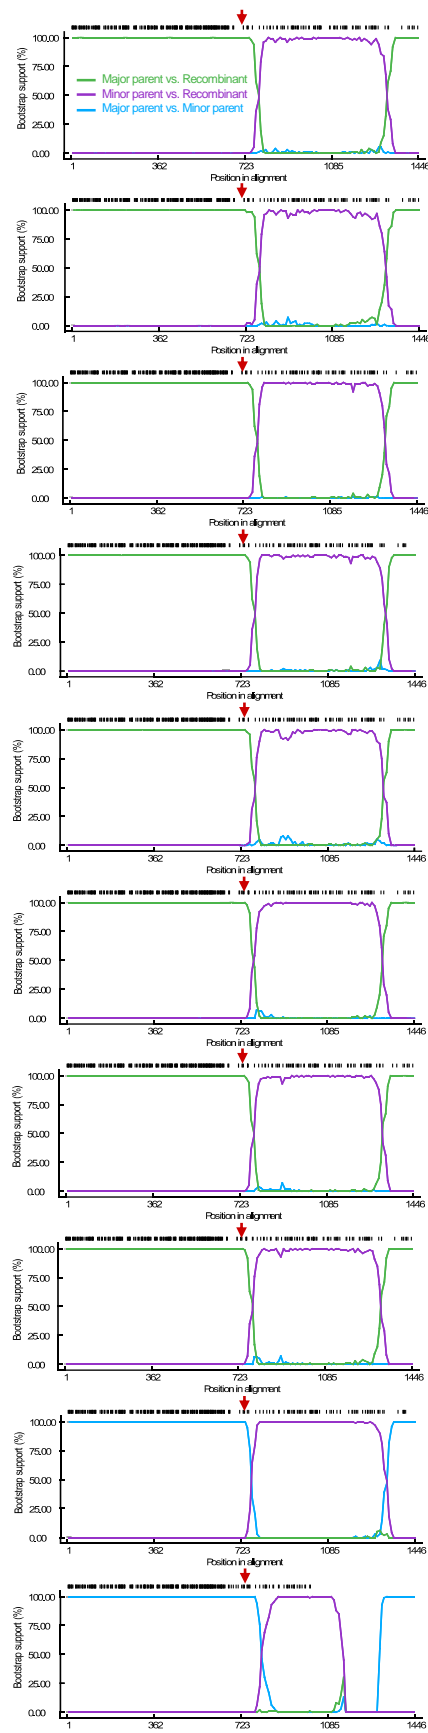

**S7 Fig. Results of recombination analyses of the viral sequences of endogenous PRVs.** Recombination analyses were performed for eRTBVL and eRTBVL2 (A), *Oryza* groups of ePVCVL and ePVCVL2 in the genomes of *O. sativa* (B) and other *Oryza* species (C), and non-*Oryza* groups of ePVCVL and ePVCVL2 in the *S. bicolor* genome (D), respectively. Different alignments for the analyses were produced because of the different lengths of examined segments having truncations. Recombination events detected with significant probabilities by more than three methods are summarized in the tables on the left. NS, not significant. Because of high sequence similarity, suggested breakpoint boundaries and possible parental sequences are variable and ambiguous for some recombination events. Recombination events were checked using BootScan plots shown on the right. In these plots, the vertical axis indicates the supporting percentage of pairwise distance measurements based on 100 bootstrap replicates, and the horizontal axis indicates relative positions in the alignments. Bars at the top of each plot indicate informative sites in each alignment. Red arrows mark the beginning site of IGRs.
