# Supplementary material
Source: publisher figshare collection journal article supplement (https://plos.figshare.com/articles/dataset/_/5160220)
Supplement: Supplementary file 1 [file 1 › S9 Fig.pdf]

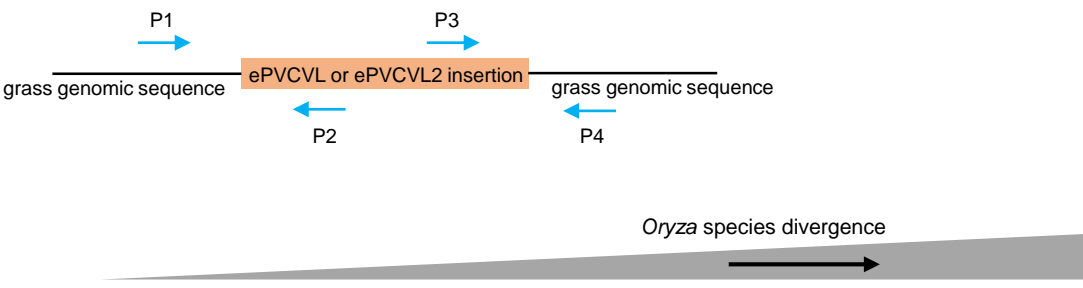

| Locus                     | Primer pairs | FF-genome group                  | BB-genome group               | AA-genome group                   |                                     |                                   |                                      |                                  |
|---------------------------|--------------|----------------------------------|-------------------------------|-----------------------------------|-------------------------------------|-----------------------------------|--------------------------------------|----------------------------------|
|                           |              | <i>O. brachyantha</i><br>(W1402) | <i>O. punctata</i><br>(W1514) | <i>O. meridionalis</i><br>(W2112) | <i>O. longistaminata</i><br>(W1413) | <i>O. glumaepatula</i><br>(W1169) | <i>O. glaberrima</i><br>(IRGC103777) | <i>O. sativa</i><br>(Nipponbare) |
| ePVCVL2-OS9               | P1 + P2      | -                                | -                             | -                                 | -                                   | +                                 | +                                    | +                                |
|                           | P3 + P4      | -                                | -                             | -                                 | -                                   | +                                 | +                                    | +                                |
| ePVCVL-OS10 & ePVCVL-OS11 | P1 + P2      | -                                | -                             | +                                 | +                                   | +                                 | +                                    | +                                |
|                           | P3 + P4      | -                                | -                             | +                                 | +                                   | +                                 | +                                    | +                                |
| ePVCVL2-OS5               | P1 + P2      | -                                | -                             | -                                 | -                                   | -                                 | +                                    | +                                |
| ePVCVL-OS3 & ePVCVL-OS4   | P3 + P4      | -                                | -                             | -                                 | -                                   | -                                 | +                                    | +                                |
| ePVCVL2-OS8               | P1 + P4      | -                                | -                             | -                                 | -                                   | -                                 | -                                    | +                                |
| ePVCVL-OS2                | P1 + P4      | -                                | -                             | -                                 | -                                   | -                                 | -                                    | +                                |

**S9 Fig. Genomic PCR and Sanger sequencing validation of the presence/absence of representative ePVCVL and ePVCVL2 segments (orthologous loci) in *Oryza* genomes.** The PCR strategy used to detect the presence/absence of a given ePVCVL or ePVCVL2 locus is shown at the top. Blue arrows indicate primers used for PCR detection. PCR and sequencing results are summarized in the table (+, presence; −, absence). Accessions of *Oryza* species used in the analysis are indicated in parentheses. Primer information is given in S6 Table.
