# Supplementary material
Source: publisher figshare collection journal article supplement (https://plos.figshare.com/articles/dataset/_/5160220)
Supplement: Supplementary file 1 [file 1 › S11 Fig.pdf]

**A**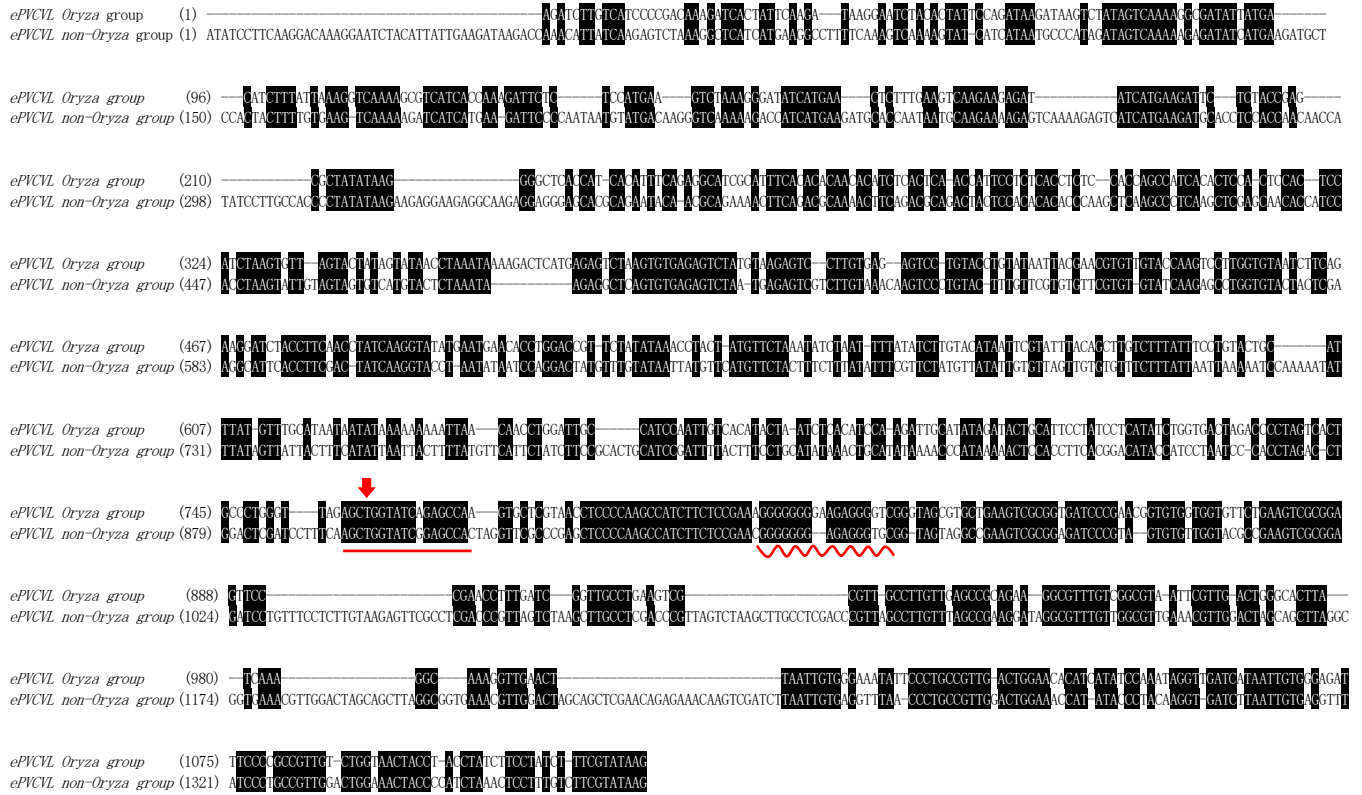**B**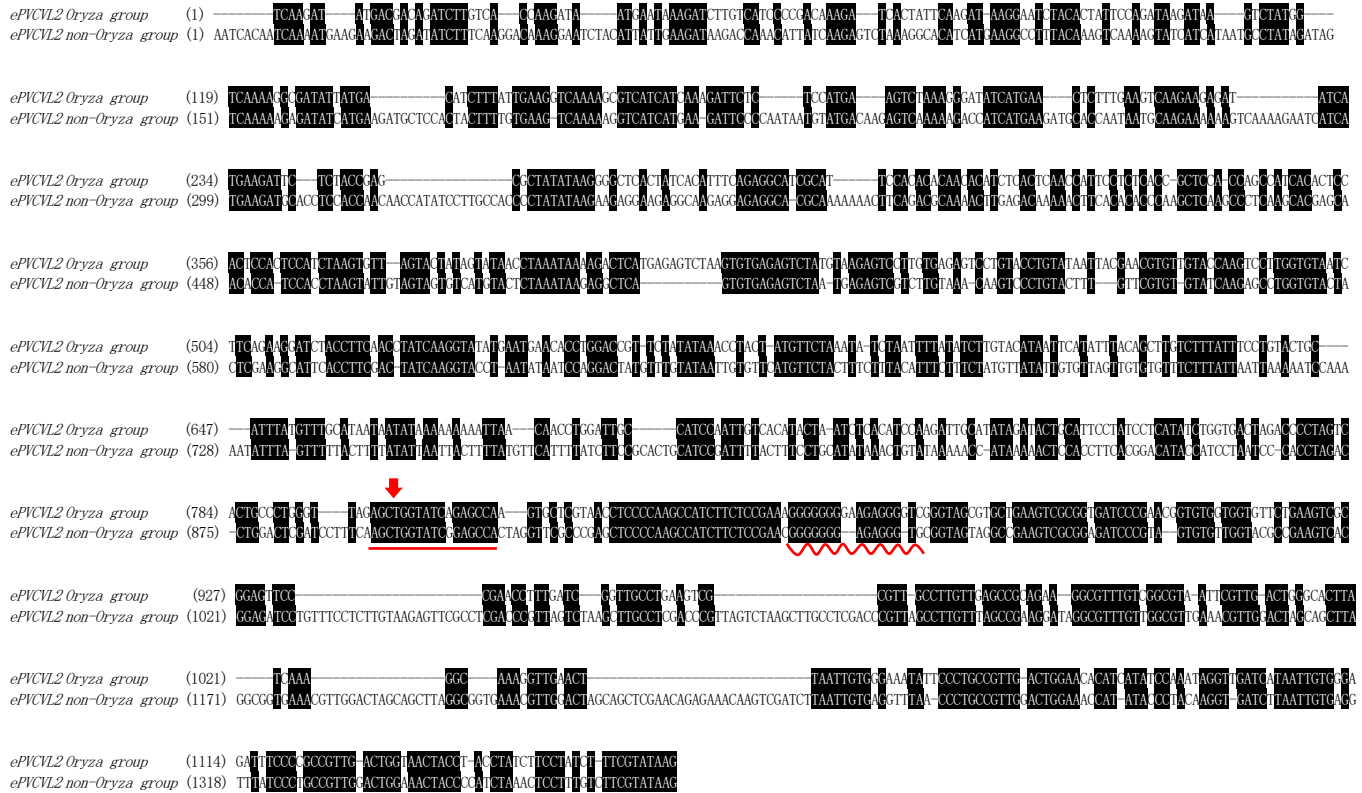

**S11 Fig. Sequence comparisons of IGRs between *Oryza* and non-*Oryza* ePVCVL/ePVCVL2 groups.** Pairwise alignments were generated between ePVCVL *Oryza* and non-*Oryza* groups (A) and between ePVCVL2 *Oryza* and non-*Oryza* groups (B) using consensus sequences constructed from *O. sativa* and *S. bicolor* genomes, respectively. Identical sites are indicated by black backgrounds. The relative position of the first nucleotide in each row of the alignment is given in parentheses. Red arrows, straight lines, and wavy lines indicate predicted strand discontinuity (i.e., the start of the minus-strand 5'-terminal), primer binding sites, and polypurine tracts, respectively.
